# Supplementary material for: Proteomic landscape of porcine induced neural stem cell reprogramming and differentiation
Source: PeerJ. 2025 Oct 3;13:e20120. doi: 10.7717/peerj.20120 (PMC12499565; doi:10.7717/peerj.20120)
Supplement: Supplemental Information 1 [file peerj-13-20120-s001.xlsx]

## Sheet: Sheet1
Protein IDs	Proteins name	Fasta headers	Number of proteins	Peptides	Sequence coverage [%]	Mol. weight [kDa]	Sequence length	Q-value	Score	MS/MS count	LFQ intensity_PEF R1	LFQ intensity_PEF R2	LFQ intensity_PEF R3	LFQ intensity_iNS7_R1	LFQ intensity_iNS7_R2	LFQ intensity_iNS7_R3	LFQ intensity_iNS15_R1	LFQ intensity_iNS15_R2	LFQ intensity_iNS15_R3	LFQ intensity_Diff7_R1	LFQ intensity_Diff7_R2	LFQ intensity_Diff7_R3	LFQ intensity_Diff15_R1	LFQ intensity_Diff15_R2	LFQ intensity_Diff15_R3
Label											PTFs	PTFs	PTFs	VSMUi002-B	VSMUi002-B	VSMUi002-B	VSMUi002-E	VSMUi002-E	VSMUi002-E	x VSMUi002-B-NGs	x VSMUi002-B-NGs	x VSMUi002-B-NGs	x VSMUi002-E-NGs	x VSMUi002-E-NGs	x VSMUi002-E-NGs
A0A480LMB4	ZZ-type zinc finger-containing protein 3 isoform X1	tr|A0A480LMB4|A0A480LMB4_PIG ZZ-type zinc finger-containing protein 3 isoform X1 OS=Sus scrofa OX=9823 PE=4 SV=1;tr|A0A4X1UQW2|A0A4X1UQW2_PIG Uncharacterized protein OS=Sus scrofa OX=9823 GN=ZZZ3 PE=4 SV=1;tr|F1S9R4|F1S9R4_PIG ZZ-type zinc finger-containin	4	1	1.2	75.874	679	0.60727	0.17333	1	0	0	0	35748	180260	25542	0	0	0	0	0	0	0	0	0
A0A480VMZ2	Zyxin	tr|A0A480VMZ2|A0A480VMZ2_PIG Zyxin OS=Sus scrofa OX=9823 PE=4 SV=1;tr|A0A481AUZ6|A0A481AUZ6_PIG Zyxin OS=Sus scrofa OX=9823 PE=4 SV=1;tr|A0A480HIX6|A0A480HIX6_PIG Zyxin OS=Sus scrofa OX=9823 PE=4 SV=1;tr|A0A480ZBU4|A0A480ZBU4_PIG Zyxin OS=Sus scrofa OX=982	12	11	28.4	59.767	556	0.0025381	11.345	29	336210	928570	777690	111550	165510	198380	161450	123580	236210	32247	28485	44710	0	0	0
I3LAI8	ZW10 interacting kinetochore protein	tr|I3LAI8|I3LAI8_PIG ZW10 interacting kinetochore protein OS=Sus scrofa OX=9823 GN=ZWINT PE=4 SV=1;tr|A0A4X1VCE7|A0A4X1VCE7_PIG Uncharacterized protein OS=Sus scrofa OX=9823 GN=ZWINT PE=4 SV=1	2	1	4.4	33.245	294	0.37044	0.43473	2	0	0	0	33700	39794	70778	0	0	0	0	0	0	0	0	0
A0A5G2QPD6	ZP domain-containing protein	tr|A0A5G2QPD6|A0A5G2QPD6_PIG ZP domain-containing protein OS=Sus scrofa OX=9823 PE=4 SV=1	1	1	1.8	70.297	665	0.65905	0.050816	1	0	0	0	203210	639250	654150	127720	127560	104040	0	0	0	0	0	0
A0A4X1UB33	Zonadhesin	tr|A0A4X1UB33|A0A4X1UB33_PIG Zonadhesin OS=Sus scrofa OX=9823 GN=ZAN PE=4 SV=1;tr|A0A4X1UFB2|A0A4X1UFB2_PIG Zonadhesin OS=Sus scrofa OX=9823 GN=ZAN PE=4 SV=1;tr|F1RMX7|F1RMX7_PIG Zonadhesin OS=Sus scrofa OX=9823 GN=ZAN PE=4 SV=4;sp|Q28983|ZAN_PIG Zonadhesi	6	2	1.3	270.16	2474	0.4275	0.37298	2	0	0	0	0	0	0	41041	30832	11047	0	0	0	1476300	541980	677910
A0A4X1TCG5	Zona pellucida-binding protein 1	tr|A0A4X1TCG5|A0A4X1TCG5_PIG Zona pellucida-binding protein 1 OS=Sus scrofa OX=9823 GN=ZPBP PE=3 SV=1	1	1	5	36.462	318	0.63555	0.12007	1	20372	44553	30263	0	0	0	0	0	0	0	0	0	0	0	0
A0A4X1U6C6	ZIP4_domain domain-containing protein	tr|A0A4X1U6C6|A0A4X1U6C6_PIG ZIP4_domain domain-containing protein OS=Sus scrofa OX=9823 PE=3 SV=1;tr|A0A287AX53|A0A287AX53_PIG Solute carrier family 39 member 12 OS=Sus scrofa OX=9823 GN=SLC39A12 PE=3 SV=1;tr|A0A4X1UB81|A0A4X1UB81_PIG ZIP4_domain domain-c	4	1	1.4	77.184	691	0.61134	0.16557	1	700560	704753	680150	0	0	0	0	0	0	0	0	0	0	0	0
F1RR15	Zinc fingers and homeoboxes 1	tr|F1RR15|F1RR15_PIG Zinc fingers and homeoboxes 1 OS=Sus scrofa OX=9823 GN=ZHX1 PE=3 SV=1;tr|A0A4X1T161|A0A4X1T161_PIG Uncharacterized protein OS=Sus scrofa OX=9823 GN=ZHX1 PE=3 SV=1	2	1	1.1	97.88	872	0.49617	0.29148	1	0	0	0	0	0	0	65561	43713	15371	0	0	0	0	0	0
A0A0B8RS53	Zinc finger, CCHC domain containing 11 (Fragment)	tr|A0A0B8RS53|A0A0B8RS53_PIG Zinc finger, CCHC domain containing 11 (Fragment) OS=Sus scrofa domesticus OX=9825 GN=ZCCHC11 PE=4 SV=1;tr|A0A4X1WAU0|A0A4X1WAU0_PIG Uncharacterized protein OS=Sus scrofa OX=9823 PE=4 SV=1;tr|A0A286ZZL2|A0A286ZZL2_PIG Terminal	13	1	1.1	139.66	1239	0.53168	0.25343	1	0	0	0	0	0	0	17674	29297	8548.6	0	0	0	0	0	0
A0A287B0L4	Zinc finger ZZ-type and EF-hand domain containing 1	tr|A0A287B0L4|A0A287B0L4_PIG Zinc finger ZZ-type and EF-hand domain containing 1 OS=Sus scrofa OX=9823 GN=ZZEF1 PE=4 SV=1;tr|A0A4X1UG74|A0A4X1UG74_PIG Uncharacterized protein OS=Sus scrofa OX=9823 PE=4 SV=1;tr|A0A4X1ULI4|A0A4X1ULI4_PIG Uncharacterized prot	3	1	0.5	320.55	2877	0.64533	0.098973	1	0	0	0	14803	94071	22189	0	0	0	0	0	0	0	0	0
A0A5G2QZD8	Zinc finger SWIM-type containing 6	tr|A0A5G2QZD8|A0A5G2QZD8_PIG Zinc finger SWIM-type containing 6 OS=Sus scrofa OX=9823 GN=ZSWIM6 PE=4 SV=1	1	1	3.5	35.407	313	0.6604	0.025519	1	0	0	0	0	0	0	94029	108290	250240	0	0	0	0	0	0
A0A286ZZ19	Zinc finger SWIM-type containing 5	tr|A0A286ZZ19|A0A286ZZ19_PIG Zinc finger SWIM-type containing 5 OS=Sus scrofa OX=9823 GN=ZSWIM5 PE=4 SV=1;tr|A0A4X1W9P9|A0A4X1W9P9_PIG SWIM-type domain-containing protein OS=Sus scrofa OX=9823 PE=4 SV=1;tr|A0A480JDS5|A0A480JDS5_PIG Zinc finger SWIM domain-	4	1	1.4	123.6	1128	0.45392	0.33945	1	87907	119180	290880	0	0	0	0	0	0	0	0	0	0	0	0
A0A480U818	Zinc finger SWIM domain-containing protein 8 isoform X3	tr|A0A480U818|A0A480U818_PIG Zinc finger SWIM domain-containing protein 8 isoform X3 OS=Sus scrofa OX=9823 PE=4 SV=1;tr|A0A480TRF2|A0A480TRF2_PIG Zinc finger SWIM domain-containing protein 8 isoform X5 OS=Sus scrofa OX=9823 PE=4 SV=1;tr|A0A480W0G4|A0A480W0	20	3	2.4	120.3	1140	0.19956	0.64037	3	0	0	0	63798	57784	56116	30897	22636	13908	0	0	0	0	0	0
A0A480W131	Zinc finger Ran-binding domain-containing protein 2	tr|A0A480W131|A0A480W131_PIG Zinc finger Ran-binding domain-containing protein 2 OS=Sus scrofa OX=9823 PE=3 SV=1;tr|A0A5G2RM88|A0A5G2RM88_PIG Zinc finger Ran-binding domain-containing protein 2 OS=Sus scrofa OX=9823 GN=ZRANB2 PE=3 SV=1;tr|A0A5S6FXB9|A0A5S6	5	2	7.8	29.24	257	0.057143	1.1337	10	0	0	0	102840	114910	224780	41903	111900	204880	65410	82407	85240	0	0	0
A0A480N9H0	Zinc finger protein with KRAB and SCAN domains 4 isoform X1	tr|A0A480N9H0|A0A480N9H0_PIG Zinc finger protein with KRAB and SCAN domains 4 isoform X1 OS=Sus scrofa OX=9823 PE=4 SV=1;tr|A0A480N9D2|A0A480N9D2_PIG Zinc finger protein with KRAB and SCAN domains 4 isoform X1 OS=Sus scrofa OX=9823 PE=4 SV=1;tr|F1S1S1|F1S1	4	1	2.4	61.512	541	0.63215	0.12606	1	0	0	0	156710	22141	22196	0	0	0	0	0	0	0	0	0
A0A287ANS9	Zinc finger protein OZF-like	tr|A0A287ANS9|A0A287ANS9_PIG Zinc finger protein OZF-like OS=Sus scrofa OX=9823 PE=4 SV=1	1	1	3.4	59.373	526	0.59985	0.18184	1	57823	98769	72533	0	0	0	0	0	0	0	0	0	0	0	0
A0A287BMP2	Zinc finger protein 836	tr|A0A287BMP2|A0A287BMP2_PIG Zinc finger protein 836 OS=Sus scrofa OX=9823 GN=LOC100624467 PE=4 SV=1	1	1	2.4	63.983	553	0.65171	0.080611	1	0	0	0	0	0	0	114180	190460	141410	0	0	0	0	0	0
A0A5K1UKL9	Zinc finger protein 821	tr|A0A5K1UKL9|A0A5K1UKL9_PIG Zinc finger protein 821 OS=Sus scrofa OX=9823 GN=ZNF821 PE=4 SV=1;tr|A0A4X1SMR7|A0A4X1SMR7_PIG Uncharacterized protein OS=Sus scrofa OX=9823 GN=ZNF821 PE=4 SV=1;tr|F1S3C6|F1S3C6_PIG Zinc finger protein 821 OS=Sus scrofa OX=9823	4	1	15.8	16.269	146	0.65768	0.063126	1	0	0	0	0	0	0	0	0	0	291840	130090	246100	0	0	0
F1SAE2	Zinc finger protein 786	tr|F1SAE2|F1SAE2_PIG Zinc finger protein 786 OS=Sus scrofa OX=9823 GN=ZNF786 PE=4 SV=4	1	1	1.2	81.771	735	0.4696	0.31861	1	0	0	0	0	0	0	137860	175560	91938	0	0	0	0	0	0
A0A480VPA6	Zinc finger protein 777 isoform X2	tr|A0A480VPA6|A0A480VPA6_PIG Zinc finger protein 777 isoform X2 OS=Sus scrofa OX=9823 PE=4 SV=1;tr|A0A4X1UN94|A0A4X1UN94_PIG Uncharacterized protein OS=Sus scrofa OX=9823 GN=ZNF777 PE=4 SV=1;tr|F1SRN9|F1SRN9_PIG Uncharacterized protein OS=Sus scrofa OX=982	3	1	2.2	78.206	690	0.53338	0.25584	1	0	0	0	0	0	0	0	0	0	0	0	0	197080	96930	61071
A0A481D7Q5	Zinc finger protein 771	tr|A0A481D7Q5|A0A481D7Q5_PIG Zinc finger protein 771 OS=Sus scrofa OX=9823 PE=4 SV=1;tr|A0A4X1TYV7|A0A4X1TYV7_PIG Uncharacterized protein OS=Sus scrofa OX=9823 GN=ZNF771 PE=4 SV=1;tr|A0A287B3R4|A0A287B3R4_PIG Zinc finger protein 771 OS=Sus scrofa OX=9823 G	3	1	2.9	35.186	309	0.39592	0.40749	1	24589	50733	7392.1	0	0	0	0	0	0	0	0	0	0	0	0
A0A287AHN6	Zinc finger protein 740	tr|A0A287AHN6|A0A287AHN6_PIG Zinc finger protein 740 OS=Sus scrofa OX=9823 GN=ZNF740 PE=4 SV=2;tr|A0A4X1WBF9|A0A4X1WBF9_PIG Uncharacterized protein OS=Sus scrofa OX=9823 GN=ZNF740 PE=4 SV=1;tr|A0A5G2R7M6|A0A5G2R7M6_PIG Zinc finger protein 740 OS=Sus scrofa	3	1	8.3	21.943	193	0.18646	0.69058	1	0	0	0	726637	7770100	829510	0	0	0	0	0	0	0	0	0
A0A480HZ06	Zinc finger protein 709	tr|A0A480HZ06|A0A480HZ06_PIG Zinc finger protein 709 OS=Sus scrofa OX=9823 PE=4 SV=1;tr|A0A287A0K5|A0A287A0K5_PIG Zinc finger protein 709 OS=Sus scrofa OX=9823 GN=LOC102167351 PE=4 SV=1	2	1	2.4	74.55	636	0.60776	0.17435	1	0	0	0	0	0	0	91663	75277	22898	0	0	0	0	0	0
F1S5U0	Zinc finger protein 672 isoform X1	tr|F1S5U0|F1S5U0_PIG Zinc finger protein 672 isoform X1 OS=Sus scrofa OX=9823 GN=ZNF672 PE=4 SV=1;tr|A0A4X1TZY6|A0A4X1TZY6_PIG Uncharacterized protein OS=Sus scrofa OX=9823 GN=ZNF672 PE=4 SV=1	2	1	1.9	52.061	464	0.62487	0.13887	1	0	0	0	0	0	0	0	0	0	0	0	0	21770	78075	41693
A0A287AF13	Zinc finger protein 671	tr|A0A287AF13|A0A287AF13_PIG Zinc finger protein 671 OS=Sus scrofa OX=9823 GN=ZNF671 PE=4 SV=1;tr|A0A4X1SJP6|A0A4X1SJP6_PIG Uncharacterized protein OS=Sus scrofa OX=9823 PE=4 SV=1;tr|A0A4X1SJ50|A0A4X1SJ50_PIG Uncharacterized protein OS=Sus scrofa OX=9823 P	4	1	2.2	52.841	459	0.48674	0.301	1	0	0	0	0	0	0	69264	45553	25726	0	0	0	0	0	0
A0A480K0K3	Zinc finger protein 667 isoform X1 (Fragment)	tr|A0A480K0K3|A0A480K0K3_PIG Zinc finger protein 667 isoform X1 (Fragment) OS=Sus scrofa OX=9823 PE=4 SV=1;tr|A0A5G2R4V3|A0A5G2R4V3_PIG Zinc finger protein 667 OS=Sus scrofa OX=9823 GN=ZNF667 PE=4 SV=1;tr|A0A4X1T2Y9|A0A4X1T2Y9_PIG Uncharacterized protein O	6	1	2.2	62.269	537	0.59376	0.19057	1	0	0	0	0	0	0	0	0	0	1717800	1098000	1133500	0	0	0
F2Z502	Zinc finger protein 664	tr|F2Z502|F2Z502_PIG Zinc finger protein 664 OS=Sus scrofa OX=9823 GN=ZNF664 PE=1 SV=1	1	1	7.3	30.283	261	0.6483	0.092489	1	0	0	0	0	0	0	0	0	0	560990	261180	352660	0	0	0
F1S673	Zinc finger protein 648	tr|F1S673|F1S673_PIG Zinc finger protein 648 OS=Sus scrofa OX=9823 GN=ZNF648 PE=4 SV=3	1	1	2.1	57.61	524	0.58205	0.20372	1	594058	905710	440374	0	0	0	0	0	0	0	0	0	0	0	0
A0A480PKM2	Zinc finger protein 618	tr|A0A480PKM2|A0A480PKM2_PIG Zinc finger protein 618 OS=Sus scrofa OX=9823 PE=4 SV=1;tr|A0A5G2R5N3|A0A5G2R5N3_PIG Zinc finger protein 618 OS=Sus scrofa OX=9823 GN=ZNF618 PE=4 SV=1;tr|A0A4X1V3N7|A0A4X1V3N7_PIG Uncharacterized protein OS=Sus scrofa OX=9823 P	15	1	2.3	94.562	856	0.64636	0.097967	1	0	0	0	0	0	0	65881	43992	15894	0	0	0	0	0	0
F1RJG7	Zinc finger protein 582	tr|F1RJG7|F1RJG7_PIG Zinc finger protein 582 OS=Sus scrofa OX=9823 GN=ZNF582 PE=4 SV=3;tr|A0A4X1T0J4|A0A4X1T0J4_PIG Uncharacterized protein OS=Sus scrofa OX=9823 GN=ZNF582 PE=4 SV=1	2	1	2.7	60.036	517	0.1875	0.68349	2	0	0	0	69907	64419	126970	145990	205190	184036	0	0	0	0	0	0
F1RMW5	Zinc finger protein 575	tr|F1RMW5|F1RMW5_PIG Zinc finger protein 575 OS=Sus scrofa OX=9823 GN=ZNF575 PE=4 SV=4	1	1	7	35.294	327	0.56575	0.21557	1	0	0	0	0	0	0	64847	43592	15179	0	0	0	0	0	0
A0A5G2RAW9	Zinc finger protein 568	tr|A0A5G2RAW9|A0A5G2RAW9_PIG Zinc finger protein 568 OS=Sus scrofa OX=9823 GN=ZNF568 PE=4 SV=1;tr|F1RKP8|F1RKP8_PIG Zinc finger protein 568 OS=Sus scrofa OX=9823 GN=ZNF568 PE=4 SV=2;tr|A0A480ST08|A0A480ST08_PIG Zinc finger protein 568 OS=Sus scrofa OX=9823	3	1	15.4	18.396	156	0.62686	0.13735	1	0	0	0	0	0	0	0	0	0	147510	50397	158650	0	0	0
A0A480TT34	Zinc finger protein 521 isoform X4 (Fragment)	tr|A0A480TT34|A0A480TT34_PIG Zinc finger protein 521 isoform X4 (Fragment) OS=Sus scrofa OX=9823 PE=4 SV=1;tr|A0A4X1VN01|A0A4X1VN01_PIG Uncharacterized protein OS=Sus scrofa OX=9823 PE=4 SV=1;tr|A0A4X1VHF0|A0A4X1VHF0_PIG Uncharacterized protein OS=Sus scro	8	1	1.4	80.464	716	0.34799	0.45841	1	0	0	0	79699	11899	77971	0	0	0	0	0	0	0	0	0
A0A480Y4Y9	Zinc finger protein 516 isoform X1	tr|A0A480Y4Y9|A0A480Y4Y9_PIG Zinc finger protein 516 isoform X1 OS=Sus scrofa OX=9823 PE=4 SV=1;tr|A0A480K7U7|A0A480K7U7_PIG Zinc finger protein 516 isoform X1 OS=Sus scrofa OX=9823 PE=4 SV=1;tr|A0A287BIA4|A0A287BIA4_PIG Zinc finger protein 516 OS=Sus scro	4	1	1.7	66.856	629	0.56541	0.21475	1	0	0	0	0	0	0	0	0	0	612550	316320	393610	0	0	0
A0A480IHF3	Zinc finger protein 516	tr|A0A480IHF3|A0A480IHF3_PIG Zinc finger protein 516 OS=Sus scrofa OX=9823 PE=4 SV=1	1	1	1.8	66.558	614	0.43021	0.37025	1	0	0	0	43103	16000	30712	0	0	0	0	0	0	0	0	0
A0A480TDC2	Zinc finger protein 512B isoform X1	tr|A0A480TDC2|A0A480TDC2_PIG Zinc finger protein 512B isoform X1 OS=Sus scrofa OX=9823 PE=4 SV=1;tr|A0A480UGL5|A0A480UGL5_PIG Zinc finger protein 512B isoform X4 OS=Sus scrofa OX=9823 PE=4 SV=1;tr|A0A4X1TH51|A0A4X1TH51_PIG Uncharacterized protein OS=Sus sc	9	3	6.6	60.434	562	0.0051746	1.8338	2	211510	385890	186250	0	0	0	0	0	0	2347500	1445900	1522000	0	0	0
A0A5G2QQK0	Zinc finger protein 512	tr|A0A5G2QQK0|A0A5G2QQK0_PIG Zinc finger protein 512 OS=Sus scrofa OX=9823 GN=ZNF512 PE=1 SV=1	1	1	2.6	53.787	470	0.65705	0.058347	1	0	0	0	0	0	0	67932	46657	18874	0	0	0	0	0	0
A0A480E4G6	Zinc finger protein 474	tr|A0A480E4G6|A0A480E4G6_PIG Zinc finger protein 474 OS=Sus scrofa OX=9823 PE=4 SV=1;tr|A0A4X1UBH1|A0A4X1UBH1_PIG Uncharacterized protein OS=Sus scrofa OX=9823 GN=LOC100525452 PE=4 SV=1;tr|F1RLC3|F1RLC3_PIG Uncharacterized protein OS=Sus scrofa OX=9823 GN=	3	1	4.4	50.98	455	0.66035	0.042492	1	0	0	0	0	0	0	39874	100180	184380	0	0	0	0	0	0
A0A287A7V0	Zinc finger protein 469	tr|A0A287A7V0|A0A287A7V0_PIG Zinc finger protein 469 OS=Sus scrofa OX=9823 GN=ZNF469 PE=4 SV=1	1	1	0.4	395.68	3811	0.65011	0.08581	1	0	0	0	194450	990220	169403	0	0	0	0	0	0	0	0	0
A0A481BZ41	Zinc finger protein 423 isoform X2 (Fragment)	tr|A0A481BZ41|A0A481BZ41_PIG Zinc finger protein 423 isoform X2 (Fragment) OS=Sus scrofa OX=9823 PE=4 SV=1;tr|A0A481CHS4|A0A481CHS4_PIG Zinc finger protein 423 isoform X2 (Fragment) OS=Sus scrofa OX=9823 PE=4 SV=1;tr|A0A480TQ46|A0A480TQ46_PIG Zinc finger p	11	1	1.1	106.23	940	0.51464	0.27021	1	0	0	0	0	0	0	0	0	0	791190	392670	489780	0	0	0
F1RJR0	Zinc finger protein 395	tr|F1RJR0|F1RJR0_PIG Zinc finger protein 395 OS=Sus scrofa OX=9823 GN=ZNF395 PE=4 SV=4	1	1	1.8	55.461	514	0.63068	0.12903	1	0	0	0	0	0	0	444850	329650	294110	0	0	0	17599	70466	37031
A0A5G2RLF4	Zinc finger protein 385C	tr|A0A5G2RLF4|A0A5G2RLF4_PIG Zinc finger protein 385C OS=Sus scrofa OX=9823 GN=ZNF385C PE=4 SV=1	1	2	3.7	54.486	512	0.029756	1.3417	1	0	0	0	0	0	0	0	0	0	0	0	0	40911	2981.5	14485
I3LPH9	Zinc finger protein 385B	tr|I3LPH9|I3LPH9_PIG Zinc finger protein 385B OS=Sus scrofa OX=9823 GN=ZNF385B PE=4 SV=3;tr|A0A4X1TX11|A0A4X1TX11_PIG Uncharacterized protein OS=Sus scrofa OX=9823 GN=ZNF385B PE=4 SV=1	2	1	4.7	52.099	486	0.45558	0.33575	1	0	0	0	0	0	0	0	0	0	0	0	0	132180	67796	42258
F1RLB7	Zinc finger protein 382	tr|F1RLB7|F1RLB7_PIG Zinc finger protein 382 OS=Sus scrofa OX=9823 GN=ZNF382 PE=4 SV=4;tr|A0A4X1TES5|A0A4X1TES5_PIG Uncharacterized protein OS=Sus scrofa OX=9823 PE=4 SV=1;tr|A0A4X1TCN8|A0A4X1TCN8_PIG Uncharacterized protein OS=Sus scrofa OX=9823 PE=4 SV=1	4	1	2.8	57.385	492	0.45389	0.33978	1	0	0	0	0	0	0	0	0	0	0	0	0	75285	294130	242990
A0A5G2R6E8	Zinc finger protein 341	tr|A0A5G2R6E8|A0A5G2R6E8_PIG Zinc finger protein 341 OS=Sus scrofa OX=9823 GN=ZNF341 PE=4 SV=1	1	1	1.9	98.693	907	0.63748	0.1107	1	0	0	0	20011	109510	32936	0	0	0	0	0	0	0	0	0
A0A287A6T4	Zinc finger protein 311	tr|A0A287A6T4|A0A287A6T4_PIG Zinc finger protein 311 OS=Sus scrofa OX=9823 GN=ZNF311 PE=4 SV=2;tr|A0A4X1VF14|A0A4X1VF14_PIG Uncharacterized protein OS=Sus scrofa OX=9823 GN=ZNF311 PE=4 SV=1;tr|A0A480DQI2|A0A480DQI2_PIG Zinc finger protein 311 isoform X5 OS	3	1	2.2	76.868	667	0.53641	0.24825	1	0	0	0	0	0	0	684290	528060	129210	0	0	0	0	0	0
A0A481APA1	Zinc finger protein 287 isoform X1-like	tr|A0A481APA1|A0A481APA1_PIG Zinc finger protein 287 isoform X1-like OS=Sus scrofa OX=9823 PE=4 SV=1;tr|A0A480K705|A0A480K705_PIG Zinc finger protein 287 isoform X1-like OS=Sus scrofa OX=9823 PE=4 SV=1;tr|F1SDE5|F1SDE5_PIG Zinc finger protein 287 OS=Sus sc	4	1	5.8	29.36	257	0.60986	0.16847	1	0	0	0	0	0	0	0	0	0	1202300	655390	774390	0	0	0
A0A286ZVJ5	Zinc finger protein 280C	tr|A0A286ZVJ5|A0A286ZVJ5_PIG Zinc finger protein 280C OS=Sus scrofa OX=9823 GN=ZNF280C PE=4 SV=2;tr|A0A480TFL2|A0A480TFL2_PIG Zinc finger protein 280C OS=Sus scrofa OX=9823 PE=4 SV=1;tr|A0A4X1W9E7|A0A4X1W9E7_PIG C2H2-type domain-containing protein OS=Sus s	9	2	3.7	77.1	681	0.38209	0.42108	2	0	0	0	13485	5824	25966	190840	342470	46848	0	0	0	0	0	0
I3LN81	Zinc finger protein 239	tr|I3LN81|I3LN81_PIG Zinc finger protein 239 OS=Sus scrofa OX=9823 GN=ZNF239 PE=4 SV=2;tr|A0A4X1V708|A0A4X1V708_PIG Uncharacterized protein OS=Sus scrofa OX=9823 GN=ZNF239 PE=4 SV=1	2	1	3.5	46.098	405	0.44448	0.34636	1	0	0	0	0	0	0	66718	45646	17191	0	0	0	0	0	0
I3LGC5	Zinc finger protein 232	tr|I3LGC5|I3LGC5_PIG Zinc finger protein 232 OS=Sus scrofa OX=9823 GN=ZNF232 PE=4 SV=2	1	1	4.4	49.024	429	0.45835	0.33109	1	0	0	0	0	0	0	155130	56422	43057	0	0	0	0	0	0
A0A287A9L4	Zinc finger protein 207	tr|A0A287A9L4|A0A287A9L4_PIG Zinc finger protein 207 OS=Sus scrofa OX=9823 GN=ZNF207 PE=1 SV=2;tr|A0A287AD24|A0A287AD24_PIG Zinc finger protein 207 OS=Sus scrofa OX=9823 GN=ZNF207 PE=1 SV=2	2	1	3	41.91	398	0.32369	0.50531	1	0	0	0	0	0	0	0	0	0	73165	76190	143520	0	0	0
A0A286ZKT2	Zinc finger protein 177-like isoform X1	tr|A0A286ZKT2|A0A286ZKT2_PIG Zinc finger protein 177-like isoform X1 OS=Sus scrofa OX=9823 GN=LOC110259338 PE=4 SV=2	1	1	1.7	65.148	573	0.62987	0.1341	1	0	0	0	405790	23288	15395	0	0	0	0	0	0	0	0	0
K7GSJ6	Zinc finger protein 157	tr|K7GSJ6|K7GSJ6_PIG Zinc finger protein 157 OS=Sus scrofa OX=9823 GN=ZNF157 PE=4 SV=1;tr|A0A4X1VJ26|A0A4X1VJ26_PIG Uncharacterized protein OS=Sus scrofa OX=9823 PE=4 SV=1;tr|I3LML1|I3LML1_PIG Zinc finger protein 157 OS=Sus scrofa OX=9823 GN=ZNF157 PE=4 SV	3	1	3.4	50.425	439	0.58596	0.19884	1	0	0	0	11378	88326	14930	0	0	0	0	0	0	0	0	0
A0A480Y2S0	Zinc finger protein 14 homolog isoform X1	tr|A0A480Y2S0|A0A480Y2S0_PIG Zinc finger protein 14 homolog isoform X1 OS=Sus scrofa OX=9823 PE=4 SV=1;tr|A0A4X1TE60|A0A4X1TE60_PIG Uncharacterized protein OS=Sus scrofa OX=9823 GN=ZFP14 PE=4 SV=1;tr|A0A4X1TC42|A0A4X1TC42_PIG Uncharacterized protein OS=Sus	6	1	2.1	55.837	466	0.50277	0.2865	1	0	0	0	0	0	0	71490	47575	28035	0	0	0	0	0	0
A0A480K5X4	Zinc finger protein 106 isoform X1	tr|A0A480K5X4|A0A480K5X4_PIG Zinc finger protein 106 isoform X1 OS=Sus scrofa OX=9823 PE=4 SV=1;tr|A0A480TF27|A0A480TF27_PIG Zinc finger protein 106 isoform X1 OS=Sus scrofa OX=9823 PE=4 SV=1;tr|A0A287B2D1|A0A287B2D1_PIG Zinc finger protein 106 OS=Sus scro	8	1	0.9	139.34	1254	0.58117	0.20452	1	63598	289210	2170600	0	0	0	0	0	0	0	0	0	0	0	0
Q29294	Zinc finger protein (Fragment)	tr|Q29294|Q29294_PIG Zinc finger protein (Fragment) OS=Sus scrofa OX=9823 PE=2 SV=1	1	1	15.9	15.266	138	0.61995	0.14708	1	70541	5508.4	48646	0	0	0	0	0	0	0	0	0	0	0	0
A0A480XN46	Zinc finger MYM-type protein 5 isoform X1	tr|A0A480XN46|A0A480XN46_PIG Zinc finger MYM-type protein 5 isoform X1 OS=Sus scrofa OX=9823 PE=4 SV=1;tr|A0A480QQT3|A0A480QQT3_PIG Zinc finger MYM-type containing 5 OS=Sus scrofa OX=9823 GN=ZMYM5 PE=4 SV=1	2	1	1	78.407	708	0.50988	0.27628	1	25090	42869	7738.2	0	0	0	0	0	0	0	0	0	0	0	0
A0A480IKH0	Zinc finger MYM-type protein 2 isoform X1	tr|A0A480IKH0|A0A480IKH0_PIG Zinc finger MYM-type protein 2 isoform X1 OS=Sus scrofa OX=9823 PE=4 SV=1;tr|A0A480MZC4|A0A480MZC4_PIG Zinc finger MYM-type protein 2 isoform X5 OS=Sus scrofa OX=9823 PE=4 SV=1;tr|A0A480TYC7|A0A480TYC7_PIG Zinc finger MYM-type	9	1	3.8	77.284	706	0.47616	0.31335	1	0	0	0	0	0	0	0	0	0	0	0	0	100200	21844	31917
I3LK12	Zinc finger matrin-type 3	tr|I3LK12|I3LK12_PIG Zinc finger matrin-type 3 OS=Sus scrofa OX=9823 GN=ZMAT3 PE=4 SV=2;tr|A0A4X1V612|A0A4X1V612_PIG Uncharacterized protein OS=Sus scrofa OX=9823 GN=ZMAT3 PE=4 SV=1;tr|A0A287BFA4|A0A287BFA4_PIG Zinc finger matrin-type 3 OS=Sus scrofa OX=98	3	1	4.2	31.857	288	0.56465	0.21793	1	0	0	0	0	0	0	0	0	0	0	0	0	217310	83860	59729
F1RYG6	Zinc finger matrin-type 1	tr|F1RYG6|F1RYG6_PIG Zinc finger matrin-type 1 OS=Sus scrofa OX=9823 GN=ZMAT1 PE=4 SV=2;tr|A0A287BSF0|A0A287BSF0_PIG Zinc finger matrin-type 1 OS=Sus scrofa OX=9823 GN=ZMAT1 PE=4 SV=2;tr|A0A4X1SIY2|A0A4X1SIY2_PIG C2H2-type domain-containing protein OS=Sus	7	2	4.1	74.445	634	0.32602	0.49594	2	0	0	0	0	0	0	0	0	0	144470	47202	155730	400990	1340800	273100
A0A287BJC0	Zinc finger homeobox 4	tr|A0A287BJC0|A0A287BJC0_PIG Zinc finger homeobox 4 OS=Sus scrofa OX=9823 GN=ZFHX4 PE=4 SV=1;tr|A0A4X1UK52|A0A4X1UK52_PIG Uncharacterized protein OS=Sus scrofa OX=9823 PE=4 SV=1	2	3	1.5	394.55	3585	0.0099133	1.7144	4	26526	80435	8647	0	0	0	0	0	0	372650	274846	406490	46165	56881	96027
F1RQU8	Zinc finger HIT-type containing 2	tr|F1RQU8|F1RQU8_PIG Zinc finger HIT-type containing 2 OS=Sus scrofa OX=9823 GN=ZNHIT2 PE=4 SV=2;tr|A0A4X1V129|A0A4X1V129_PIG HIT-type domain-containing protein OS=Sus scrofa OX=9823 PE=4 SV=1	2	1	2.3	55.64	523	0.39695	0.40624	1	0	0	0	0	0	0	0	0	0	0	0	0	69066	247730	210320
A0A480Y3I6	Zinc finger FYVE domain-containing protein 26	tr|A0A480Y3I6|A0A480Y3I6_PIG Zinc finger FYVE domain-containing protein 26 OS=Sus scrofa OX=9823 PE=4 SV=1;tr|A0A4X1U579|A0A4X1U579_PIG Zinc finger FYVE domain-containing protein 26 OS=Sus scrofa OX=9823 PE=4 SV=1;tr|A0A4X1U7V2|A0A4X1U7V2_PIG Zinc finger F	12	2	1.1	250.09	2242	0.1	0.94593	2	907669	500170	575353	0	0	0	86292	64653	54053	0	0	0	0	0	0
I3LAN0	Zinc finger E-box binding homeobox 2	tr|I3LAN0|I3LAN0_PIG Zinc finger E-box binding homeobox 2 OS=Sus scrofa OX=9823 GN=ZEB2 PE=3 SV=2;tr|A0A4X1TCF8|A0A4X1TCF8_PIG Uncharacterized protein OS=Sus scrofa OX=9823 GN=ZEB2 PE=3 SV=1	2	1	2.1	123.98	1102	0.65827	0.052483	1	0	0	0	0	0	0	0	0	0	148090	80102	62394	0	0	0
I3LJR5	Zinc finger CCHC-type containing 8	tr|I3LJR5|I3LJR5_PIG Zinc finger CCHC-type containing 8 OS=Sus scrofa OX=9823 GN=ZCCHC8 PE=1 SV=3;tr|F1REW6|F1REW6_PIG TRAMP-like complex RNA-binding factor ZCCHC8 OS=Sus scrofa OX=9823 GN=ZCCHC8 PE=1 SV=4	2	1	1.6	75.608	690	0.54775	0.23836	1	0	0	0	0	0	0	95438	94325	48664	0	0	0	0	0	0
F1ST82	Zinc finger CCHC-type containing 7	tr|F1ST82|F1ST82_PIG Zinc finger CCHC-type containing 7 OS=Sus scrofa OX=9823 GN=ZCCHC7 PE=4 SV=4;tr|A0A480LYZ2|A0A480LYZ2_PIG Zinc finger CCHC domain-containing protein 7 OS=Sus scrofa OX=9823 PE=4 SV=1;tr|A0A4X1VGC9|A0A4X1VGC9_PIG Uncharacterized protein	5	1	3.3	63.626	545	0.62986	0.13195	1	0	0	0	0	0	0	8723.6	25775	4594.6	0	0	0	0	0	0
A0A288CG04	Zinc finger CCCH-type containing, antiviral 1	tr|A0A288CG04|A0A288CG04_PIG Zinc finger CCCH-type containing, antiviral 1 OS=Sus scrofa OX=9823 GN=ZC3HAV1 PE=1 SV=2;tr|A0A4X1VFE4|A0A4X1VFE4_PIG Uncharacterized protein OS=Sus scrofa OX=9823 GN=ZC3HAV1 PE=4 SV=1;tr|A0A4X1VAZ4|A0A4X1VAZ4_PIG Uncharacteriz	9	1	1.4	76.353	693	0.34229	0.46368	3	19770	59556	34490	0	0	0	0	0	0	0	0	0	0	0	0
F1SUA1	Zinc finger CCCH-type containing 8	tr|F1SUA1|F1SUA1_PIG Zinc finger CCCH-type containing 8 OS=Sus scrofa OX=9823 GN=ZC3H8 PE=4 SV=3;tr|A0A4X1V8I9|A0A4X1V8I9_PIG Uncharacterized protein OS=Sus scrofa OX=9823 PE=4 SV=1;tr|A0A287A746|A0A287A746_PIG Zinc finger CCCH-type containing 8 OS=Sus scr	7	2	7.5	35.601	308	0.051808	1.1854	2	0	0	0	0	0	0	189420	507610	185700	0	0	0	0	0	0
A0A5G2QQC3	Zinc finger CCCH-type containing 4	tr|A0A5G2QQC3|A0A5G2QQC3_PIG Zinc finger CCCH-type containing 4 OS=Sus scrofa OX=9823 GN=ZC3H4 PE=1 SV=1;tr|F1RM04|F1RM04_PIG Zinc finger CCCH-type containing 4 OS=Sus scrofa OX=9823 GN=ZC3H4 PE=1 SV=3;tr|A0A4X1VW17|A0A4X1VW17_PIG Uncharacterized protein O	6	1	2.2	116.38	1065	0.65932	0.046708	1	0	0	0	35321	84107	18076	0	0	0	0	0	0	0	0	0
A0A480NB78	Zinc finger CCCH domain-containing protein 3 isoform X2	tr|A0A480NB78|A0A480NB78_PIG Zinc finger CCCH domain-containing protein 3 isoform X2 OS=Sus scrofa OX=9823 PE=4 SV=1;tr|A0A480N7G5|A0A480N7G5_PIG Zinc finger CCCH domain-containing protein 3 isoform X2 OS=Sus scrofa OX=9823 PE=4 SV=1;tr|M3VH53|M3VH53_PIG Z	16	1	1.8	89.229	830	0.6158	0.1503	1	0	0	0	0	0	0	21303	77365	97020	0	0	0	0	0	0
A0A287BGG5	Zinc finger CCCH domain-containing protein 14	tr|A0A287BGG5|A0A287BGG5_PIG Zinc finger CCCH domain-containing protein 14 OS=Sus scrofa OX=9823 GN=ZC3H14 PE=1 SV=2;tr|A0A4X1SXD7|A0A4X1SXD7_PIG Zinc finger CCCH domain-containing protein 14 OS=Sus scrofa OX=9823 GN=ZC3H14 PE=3 SV=1;tr|A0A287B8R9|A0A287B8	10	4	8.9	81.878	727	0.19542	0.65618	4	379790	183970	1430743	0	0	0	0	0	0	130640	74614	126470	0	0	0
F1S6B2	Zinc finger CCCH domain-containing protein 11A isoform X1	tr|F1S6B2|F1S6B2_PIG Zinc finger CCCH domain-containing protein 11A isoform X1 OS=Sus scrofa OX=9823 GN=ZC3H11A PE=4 SV=3;tr|A0A4X1V298|A0A4X1V298_PIG Uncharacterized protein OS=Sus scrofa OX=9823 GN=ZC3H11A PE=4 SV=1;tr|A0A0B8RYZ4|A0A0B8RYZ4_PIG Zinc fing	4	2	2.8	89.616	816	0.51108	0.27805	3	0	0	0	23450	39473	10450	16244	28210	17800	0	0	0	0	0	0
F1S2Q5	Zinc finger C2HC domain-containing protein 1C	tr|F1S2Q5|F1S2Q5_PIG Zinc finger C2HC domain-containing protein 1C OS=Sus scrofa OX=9823 GN=ZC2HC1C PE=3 SV=1;tr|A0A4X1T926|A0A4X1T926_PIG Uncharacterized protein OS=Sus scrofa OX=9823 GN=ZC2HC1C PE=3 SV=1	2	1	4	59.875	524	0.63206	0.12467	1	0	0	0	322000	16697	6611.5	0	0	0	0	0	0	0	0	0
F1RWM0	Zinc finger C2HC domain-containing protein 1A isoform X3	tr|F1RWM0|F1RWM0_PIG Zinc finger C2HC domain-containing protein 1A isoform X3 OS=Sus scrofa OX=9823 GN=ZC2HC1A PE=1 SV=1;tr|A0A4X1UH23|A0A4X1UH23_PIG Uncharacterized protein OS=Sus scrofa OX=9823 GN=ZC2HC1A PE=4 SV=1;tr|A0A5G2QDB4|A0A5G2QDB4_PIG Zinc finge	3	1	5.9	35.083	323	0.65022	0.084024	1	0	0	0	0	0	0	105650	409150	143110	0	0	0	0	0	0
A0A480XW14	Zinc finger BED domain-containing protein 1	tr|A0A480XW14|A0A480XW14_PIG Zinc finger BED domain-containing protein 1 OS=Sus scrofa OX=9823 PE=4 SV=1;tr|A0A480VV08|A0A480VV08_PIG Zinc finger BED domain-containing protein 1 OS=Sus scrofa OX=9823 PE=4 SV=1;tr|A0A480VHE1|A0A480VHE1_PIG Zinc finger BED d	7	1	1.8	78.449	706	0.40181	0.4006	1	0	0	0	0	0	0	0	0	0	314980	135520	259410	0	0	0
A0A5G2QQF1	Zinc finger and SCAN domain containing 31	tr|A0A5G2QQF1|A0A5G2QQF1_PIG Zinc finger and SCAN domain containing 31 OS=Sus scrofa OX=9823 GN=ZSCAN31 PE=4 SV=1;tr|A0A481DUU4|A0A481DUU4_PIG Zinc finger and SCAN domain-containing protein 31 isoform 1 OS=Sus scrofa OX=9823 PE=4 SV=1;tr|I3LQQ7|I3LQQ7_PIG	4	1	5.3	28.71	247	0.39302	0.41042	1	0	0	0	0	0	0	49254	86743	27894	0	0	0	0	0	0
F1S1R9	Zinc finger and SCAN domain containing 26	tr|F1S1R9|F1S1R9_PIG Zinc finger and SCAN domain containing 26 OS=Sus scrofa OX=9823 GN=ZSCAN26 PE=4 SV=2;tr|A0A4X1VM12|A0A4X1VM12_PIG Uncharacterized protein OS=Sus scrofa OX=9823 PE=4 SV=1;tr|A0A480F4A6|A0A480F4A6_PIG Zinc finger and SCAN domain-containi	4	1	1.9	54.366	478	0.47297	0.31612	3	0	0	0	392733	436990	443903	131850	200610	249520	166140	216980	210430	0	0	0
A0A480L9Q1	Zinc finger and BTB domain-containing protein 41	tr|A0A480L9Q1|A0A480L9Q1_PIG Zinc finger and BTB domain-containing protein 41 OS=Sus scrofa OX=9823 PE=4 SV=1;tr|F1S638|F1S638_PIG Uncharacterized protein OS=Sus scrofa OX=9823 GN=ZBTB41 PE=4 SV=4;tr|A0A4X1SR03|A0A4X1SR03_PIG Uncharacterized protein OS=Sus	4	1	1.8	83.392	717	0.50646	0.28165	1	0	0	0	0	0	0	0	0	0	0	0	0	40165	115630	100170
A0A5G2R0R4	Zinc finger and BTB domain containing 43	tr|A0A5G2R0R4|A0A5G2R0R4_PIG Zinc finger and BTB domain containing 43 OS=Sus scrofa OX=9823 GN=ZBTB43 PE=4 SV=1;tr|A0A4X1U683|A0A4X1U683_PIG Uncharacterized protein OS=Sus scrofa OX=9823 GN=ZBTB43 PE=4 SV=1;tr|A0A287A6M7|A0A287A6M7_PIG Zinc finger and BTB	3	1	3.1	50.283	446	0.55441	0.2277	1	19173	77379	25494	0	0	0	0	0	0	0	0	0	0	0	0
A0A5G2QXM4	Zinc finger and BTB domain containing 38	tr|A0A5G2QXM4|A0A5G2QXM4_PIG Zinc finger and BTB domain containing 38 OS=Sus scrofa OX=9823 GN=ZBTB38 PE=4 SV=1	1	1	2.7	135.32	1202	0.65667	0.062588	1	37005	78541	14381	0	0	0	0	0	0	0	0	0	0	0	0
F1RLH6	Zinc finger and BTB domain containing 32	tr|F1RLH6|F1RLH6_PIG Zinc finger and BTB domain containing 32 OS=Sus scrofa OX=9823 GN=ZBTB32 PE=4 SV=3;tr|A0A4X1TG31|A0A4X1TG31_PIG BTB domain-containing protein OS=Sus scrofa OX=9823 GN=ZBTB32 PE=4 SV=1;tr|A0A4X1TK41|A0A4X1TK41_PIG C2H2-type domain-conta	4	1	3.6	34.213	309	0.56883	0.21317	1	159170	142020	728393	0	0	0	0	0	0	0	0	0	0	0	0
A0A5G2QLT7	Zinc finger and BTB domain containing 10	tr|A0A5G2QLT7|A0A5G2QLT7_PIG Zinc finger and BTB domain containing 10 OS=Sus scrofa OX=9823 GN=ZBTB10 PE=4 SV=1;tr|F1RXA0|F1RXA0_PIG Zinc finger and BTB domain containing 10 OS=Sus scrofa OX=9823 GN=ZBTB10 PE=4 SV=2	2	1	1.1	92.257	849	0.45493	0.33649	1	0	0	0	100100	42974	13096	0	0	0	0	0	0	0	0	0
F1RH10	ZFP62 zinc finger protein	tr|F1RH10|F1RH10_PIG ZFP62 zinc finger protein OS=Sus scrofa OX=9823 GN=ZFP62 PE=4 SV=3;tr|A0A4X1TD97|A0A4X1TD97_PIG Uncharacterized protein OS=Sus scrofa OX=9823 GN=ZFP62 PE=4 SV=1;tr|A0A5G2QYK8|A0A5G2QYK8_PIG ZFP62 zinc finger protein OS=Sus scrofa OX=98	5	2	2.5	104.54	919	0.39069	0.41376	2	0	0	0	0	0	0	40360	62668	52614	0	0	0	3247900	1796500	1292500
A0A287AE35	ZFP30 zinc finger protein	tr|A0A287AE35|A0A287AE35_PIG ZFP30 zinc finger protein OS=Sus scrofa OX=9823 GN=ZFP30 PE=4 SV=2;tr|A0A5G2Q7Q5|A0A5G2Q7Q5_PIG ZFP30 zinc finger protein OS=Sus scrofa OX=9823 GN=ZFP30 PE=4 SV=1;tr|A0A5G2QQ82|A0A5G2QQ82_PIG ZFP30 zinc finger protein OS=Sus sc	7	2	6.3	64.107	541	0.59697	0.18534	2	0	0	0	0	0	0	0	0	0	570580	263740	353810	0	0	0
A0A4X1VQG5	zf-Tim10_DDP domain-containing protein	tr|A0A4X1VQG5|A0A4X1VQG5_PIG zf-Tim10_DDP domain-containing protein OS=Sus scrofa OX=9823 PE=4 SV=1;tr|A0A286ZVD0|A0A286ZVD0_PIG Translocase of inner mitochondrial membrane 10 OS=Sus scrofa OX=9823 GN=TIMM10 PE=1 SV=1	2	1	26.7	10.333	90	0.4024	0.39875	5	0	0	0	10901	86572	15576	0	0	0	110406	81205	144350	41048	56837	52220
A0A5G2QDG0	zf-rbx1 domain-containing protein	tr|A0A5G2QDG0|A0A5G2QDG0_PIG zf-rbx1 domain-containing protein OS=Sus scrofa OX=9823 GN=RBX1 PE=4 SV=1;tr|A0A4X1W289|A0A4X1W289_PIG zf-rbx1 domain-containing protein OS=Sus scrofa OX=9823 GN=RBX1 PE=4 SV=1;tr|A0A4X1VWC9|A0A4X1VWC9_PIG RING-type domain-cont	4	1	17.5	11.31	103	0.0044643	2.3932	4	0	0	0	55433	56897	66270	44192	57981	62815	0	0	0	0	0	0
A0A287AXU4	zf-3CxxC domain-containing protein	tr|A0A287AXU4|A0A287AXU4_PIG zf-3CxxC domain-containing protein OS=Sus scrofa OX=9823 GN=RTP5 PE=4 SV=2	1	1	3.4	53.512	497	0.63931	0.10746	1	158494	141160	723830	25582	38899	64971	0	0	0	0	0	0	0	0	0
A0A287AD32	YTH N6-methyladenosine RNA binding protein 2	tr|A0A287AD32|A0A287AD32_PIG YTH N6-methyladenosine RNA binding protein 2 OS=Sus scrofa OX=9823 GN=YTHDF2 PE=2 SV=2;tr|A0A5G2R4W5|A0A5G2R4W5_PIG YTH N6-methyladenosine RNA binding protein 2 OS=Sus scrofa OX=9823 GN=YTHDF2 PE=4 SV=1	2	1	1.9	62.397	580	0.31561	0.52039	2	0	0	0	79899	74373	146840	97066	45891	59579	0	0	0	0	0	0
A0A5G2R9M2	YTH N6-methyladenosine RNA binding protein 1	tr|A0A5G2R9M2|A0A5G2R9M2_PIG YTH N6-methyladenosine RNA binding protein 1 OS=Sus scrofa OX=9823 GN=YTHDF1 PE=4 SV=1;tr|A0A4X1SKC3|A0A4X1SKC3_PIG Uncharacterized protein OS=Sus scrofa OX=9823 GN=YTHDF1 PE=4 SV=1;tr|A0A4X1SK49|A0A4X1SK49_PIG YTH domain-conta	6	1	17.3	5.8762	52	0.44125	0.35074	1	200273	151880	897056	0	0	0	0	0	0	0	0	0	0	0	0
A0A4X1U4J8	YjeF N-terminal domain-containing protein	tr|A0A4X1U4J8|A0A4X1U4J8_PIG YjeF N-terminal domain-containing protein OS=Sus scrofa OX=9823 PE=4 SV=1	1	1	6.4	27.218	249	0.13478	0.82223	2	85553	116770	247020	0	0	0	22645	191850	56456	0	0	0	0	0	0
A0A5G2RAL7	Yip1 interacting factor homolog B, membrane trafficking protein	tr|A0A5G2RAL7|A0A5G2RAL7_PIG Yip1 interacting factor homolog B, membrane trafficking protein OS=Sus scrofa OX=9823 GN=YIF1B PE=3 SV=1;tr|A0A4X1T739|A0A4X1T739_PIG Uncharacterized protein OS=Sus scrofa OX=9823 PE=3 SV=1;tr|A0A4X1TAG5|A0A4X1TAG5_PIG Uncharac	8	1	7.3	26.931	248	0.64859	0.092018	1	40737	3806.5	18393	0	0	0	0	0	0	0	0	0	0	0	0
A0A286ZNK4	Yes1 associated transcriptional regulator	tr|A0A286ZNK4|A0A286ZNK4_PIG Yes1 associated transcriptional regulator OS=Sus scrofa OX=9823 GN=YAP1 PE=1 SV=1;tr|A0A4X1TQ01|A0A4X1TQ01_PIG WW domain-containing protein OS=Sus scrofa OX=9823 PE=4 SV=1;tr|A0A480V9U5|A0A480V9U5_PIG Transcriptional coactivato	7	5	22.2	47.253	432	0	65.189	10	0	0	0	79837	179690	94000	102700	89374	227530	169770	79818	196470	0	0	0
A0A286ZR56	YEATS domain containing 2	tr|A0A286ZR56|A0A286ZR56_PIG YEATS domain containing 2 OS=Sus scrofa OX=9823 GN=YEATS2 PE=4 SV=2	1	1	0.9	143.99	1368	0.61497	0.15228	1	0	0	0	80619	23090	44444	0	0	0	0	0	0	0	0	0
F1SQ46	Y-box binding protein 3	tr|F1SQ46|F1SQ46_PIG Y-box binding protein 3 OS=Sus scrofa OX=9823 GN=YBX3 PE=1 SV=2;tr|A0A4X1V343|A0A4X1V343_PIG CSD domain-containing protein OS=Sus scrofa OX=9823 GN=YBX3 PE=4 SV=1;tr|A0A5G2QPK7|A0A5G2QPK7_PIG Y-box binding protein 3 OS=Sus scrofa OX=98	6	3	17.6	32.694	312	0	36.882	19	58748	105390	77194	24633	41740	42697	31644	14475	14283	27858	21336	35859	0	0	0
A0A4X1UZX5	XRN2-binding (XTBD) domain-containing protein	tr|A0A4X1UZX5|A0A4X1UZX5_PIG XRN2-binding (XTBD) domain-containing protein OS=Sus scrofa OX=9823 GN=CDKN2AIPNL PE=3 SV=1;tr|A0A287ACW8|A0A287ACW8_PIG CDKN2A interacting protein N-terminal like OS=Sus scrofa OX=9823 GN=CDKN2AIPNL PE=1 SV=1	2	1	15.5	13.182	116	0.10156	0.93603	1	0	0	0	7608.1	12771	63696	0	0	0	0	0	0	0	0	0
A0A287ABD7	XPC complex subunit, DNA damage recognition and repair factor	tr|A0A287ABD7|A0A287ABD7_PIG XPC complex subunit, DNA damage recognition and repair factor OS=Sus scrofa OX=9823 GN=XPC PE=1 SV=1	1	1	1.3	112.26	1018	0.63978	0.10621	1	0	0	0	0	0	0	0	0	0	0	0	0	244580	945270	164110
K7GMG2	XK-related protein	tr|K7GMG2|K7GMG2_PIG XK-related protein OS=Sus scrofa OX=9823 GN=XKRX PE=3 SV=2;tr|A0A5G2RDV4|A0A5G2RDV4_PIG XK-related protein OS=Sus scrofa OX=9823 GN=XKRX PE=3 SV=1;tr|A0A4X1W3I3|A0A4X1W3I3_PIG XK-related protein OS=Sus scrofa OX=9823 GN=XKRX PE=3 SV=1	3	1	18	16.077	139	0.52184	0.26648	1	0	0	0	0	0	0	471700	359950	337580	0	0	0	649520	2125100	435010
A0A5S6GBB0	Xaa-Pro aminopeptidase 2	tr|A0A5S6GBB0|A0A5S6GBB0_PIG Xaa-Pro aminopeptidase 2 OS=Sus scrofa OX=9823 GN=XPNPEP2 PE=3 SV=1;sp|Q95333|XPP2_PIG Xaa-Pro aminopeptidase 2 OS=Sus scrofa OX=9823 GN=XPNPEP2 PE=1 SV=1	2	1	1.6	75.114	667	0.42443	0.38054	1	73879	14936	54936	0	0	0	0	0	0	0	0	0	0	0	0
A0A287BJ37	X-box binding protein 1	tr|A0A287BJ37|A0A287BJ37_PIG X-box binding protein 1 OS=Sus scrofa OX=9823 GN=XBP1 PE=4 SV=2;tr|A0A287AY46|A0A287AY46_PIG X-box binding protein 1 OS=Sus scrofa OX=9823 GN=XBP1 PE=4 SV=2	2	1	9.6	26.353	240	0.25717	0.63158	0	0	0	0	35748	179820	43894	0	0	0	0	0	0	0	0	0
F1SJP0	WW domain containing transcription regulator 1	tr|F1SJP0|F1SJP0_PIG WW domain containing transcription regulator 1 OS=Sus scrofa OX=9823 GN=WWTR1 PE=4 SV=4;tr|A0A4X1SZP1|A0A4X1SZP1_PIG WW domain-containing protein OS=Sus scrofa OX=9823 GN=WWTR1 PE=4 SV=1	2	1	2	43.811	398	0.65157	0.08135	1	0	0	0	0	0	0	128280	128740	108140	0	0	0	0	0	0
A0A5G2QB42	WW domain binding protein 2	tr|A0A5G2QB42|A0A5G2QB42_PIG WW domain binding protein 2 OS=Sus scrofa OX=9823 GN=WBP2 PE=1 SV=1;tr|A0A4X1UYG8|A0A4X1UYG8_PIG GRAM domain-containing protein OS=Sus scrofa OX=9823 PE=4 SV=1;tr|A0A4X1UW28|A0A4X1UW28_PIG GRAM domain-containing protein OS=Sus	3	1	6.8	24.907	234	0.64839	0.095806	1	0	0	0	0	0	0	40516	63525	55448	0	0	0	0	0	0
A0A287AZS4	WW and C2 domain containing 2	tr|A0A287AZS4|A0A287AZS4_PIG WW and C2 domain containing 2 OS=Sus scrofa OX=9823 GN=WWC2 PE=4 SV=2;tr|A0A4X1VYQ5|A0A4X1VYQ5_PIG Uncharacterized protein OS=Sus scrofa OX=9823 GN=WWC2 PE=4 SV=1	2	1	2.4	96.323	873	0.62502	0.13825	1	0	0	0	0	0	0	83926	128890	481210	0	0	0	0	0	0
A0A287BFZ3	Wolframin ER transmembrane glycoprotein	tr|A0A287BFZ3|A0A287BFZ3_PIG Wolframin ER transmembrane glycoprotein OS=Sus scrofa OX=9823 GN=WFS1 PE=1 SV=2;tr|A0A480PU65|A0A480PU65_PIG Wolframin isoform X1 OS=Sus scrofa OX=9823 PE=4 SV=1;tr|A0A480SAH0|A0A480SAH0_PIG Wolframin (Fragment) OS=Sus scrofa O	19	1	1	99.144	889	0.42686	0.37588	1	17217	60992	4303.2	0	0	0	0	0	0	0	0	0	0	0	0
A0A5G2QIZ4	Wiskott-Aldrich syndrome protein family member	tr|A0A5G2QIZ4|A0A5G2QIZ4_PIG Wiskott-Aldrich syndrome protein family member OS=Sus scrofa OX=9823 GN=WASF2 PE=1 SV=1;tr|A0A4X1U801|A0A4X1U801_PIG Wiskott-Aldrich syndrome protein family member OS=Sus scrofa OX=9823 GN=WASF2 PE=3 SV=1;tr|A0A5G2QHA3|A0A5G2QH	6	1	3.9	31.956	281	0.59754	0.1844	1	0	0	0	141210	91165	321320	0	0	0	0	0	0	0	0	0
A0A4X1TTA5	WH2 domain-containing protein	tr|A0A4X1TTA5|A0A4X1TTA5_PIG WH2 domain-containing protein OS=Sus scrofa OX=9823 PE=4 SV=1;tr|A0A286ZUJ0|A0A286ZUJ0_PIG Uncharacterized protein OS=Sus scrofa OX=9823 GN=INF2 PE=4 SV=1	2	1	2.7	57.485	546	0.33765	0.47649	2	44318	38191	110790	0	0	0	0	0	0	0	0	0	0	0	0
A0A4X1T3H9	WH1 domain-containing protein	tr|A0A4X1T3H9|A0A4X1T3H9_PIG WH1 domain-containing protein OS=Sus scrofa OX=9823 PE=3 SV=1;tr|A0A4X1T604|A0A4X1T604_PIG WH1 domain-containing protein OS=Sus scrofa OX=9823 PE=3 SV=1;tr|A0A5G2QNU8|A0A5G2QNU8_PIG WH1 domain-containing protein OS=Sus scrofa O	13	3	9.5	61.105	548	0.0027174	13.294	33	89781	206040	35237	135870	152480	186750	203890	260160	326320	484257	584957	341320	184973	112010	178860
A0A4X1VYH7	WD_REPEATS_REGION domain-containing protein	tr|A0A4X1VYH7|A0A4X1VYH7_PIG WD_REPEATS_REGION domain-containing protein OS=Sus scrofa OX=9823 PE=4 SV=1;tr|A0A4X1VY39|A0A4X1VY39_PIG WD_REPEATS_REGION domain-containing protein OS=Sus scrofa OX=9823 PE=4 SV=1;tr|A0A5K1VU58|A0A5K1VU58_PIG Histone-binding p	7	3	8.3	45.939	409	0	36.517	66	191300	215770	120280	571770	448540	554400	516470	506450	438980	404210	299740	406490	161830	184050	258712
A0A5G2QZU6	WD repeat, SAM and U-box domain-containing protein 1	tr|A0A5G2QZU6|A0A5G2QZU6_PIG WD repeat, SAM and U-box domain-containing protein 1 OS=Sus scrofa OX=9823 GN=WDSUB1 PE=4 SV=1;tr|A0A4X1VPE4|A0A4X1VPE4_PIG WD repeat, SAM and U-box domain-containing protein 1 OS=Sus scrofa OX=9823 GN=WDSUB1 PE=4 SV=1;tr|A0A5G	10	1	4.9	47.543	429	0.51079	0.27431	1	0	0	0	0	0	0	0	0	0	629320	708740	931300	0	0	0
A0A5G2QEA0	WD repeat-containing protein 89	tr|A0A5G2QEA0|A0A5G2QEA0_PIG WD repeat-containing protein 89 OS=Sus scrofa OX=9823 GN=WDR89 PE=4 SV=1	1	1	4.5	44.653	402	0.43043	0.36956	1	67493	104110	144489	0	0	0	42255	32108	12018	0	0	0	0	0	0
F1SSM8	WD repeat-containing protein 86 isoform 2	tr|F1SSM8|F1SSM8_PIG WD repeat-containing protein 86 isoform 2 OS=Sus scrofa OX=9823 GN=WDR86 PE=4 SV=3	1	1	2.1	40.558	376	0.41779	0.38387	1	51977	55480	26875	0	0	0	0	0	0	0	0	0	0	0	0
A0A480QLQ8	WD repeat-containing protein 81 isoform 1	tr|A0A480QLQ8|A0A480QLQ8_PIG WD repeat-containing protein 81 isoform 1 OS=Sus scrofa OX=9823 PE=4 SV=1;tr|A0A480TGE7|A0A480TGE7_PIG WD repeat-containing protein 81 isoform 1 OS=Sus scrofa OX=9823 PE=4 SV=1;tr|A0A481CBX4|A0A481CBX4_PIG WD repeat-containing	18	1	0.9	143.25	1308	0.55136	0.23128	1	0	0	0	377410	21549	11520	0	0	0	0	0	0	0	0	0
A0A481CNQ7	WD repeat-containing protein 70 isoform 2	tr|A0A481CNQ7|A0A481CNQ7_PIG WD repeat-containing protein 70 isoform 2 OS=Sus scrofa OX=9823 PE=4 SV=1;tr|A0A5G2R8L5|A0A5G2R8L5_PIG WD repeat domain 70 OS=Sus scrofa OX=9823 GN=WDR70 PE=4 SV=1;tr|A0A287B3W0|A0A287B3W0_PIG WD repeat domain 70 OS=Sus scrofa	4	1	10.6	10.307	94	0.27794	0.59449	1	0	0	0	0	0	0	0	0	0	258980	113070	208990	0	0	0
Q8HXL3	WD repeat-containing protein 62	sp|Q8HXL3|WDR62_PIG WD repeat-containing protein 62 OS=Sus scrofa OX=9823 GN=WDR62 PE=3 SV=1;tr|F1RLF2|F1RLF2_PIG WD repeat-containing protein 62 OS=Sus scrofa OX=9823 GN=WDR62 PE=4 SV=2;tr|A0A4X1TDS0|A0A4X1TDS0_PIG WD repeat-containing protein 62 OS=Sus s	9	2	1.6	168.9	1541	0.53269	0.25523	2	594654	226370	667740	0	0	0	0	0	0	93614	50013	94319	0	0	0
A0A287BKJ4	WD repeat-containing protein 60 isoform X1	tr|A0A287BKJ4|A0A287BKJ4_PIG WD repeat-containing protein 60 isoform X1 OS=Sus scrofa OX=9823 GN=WDR60 PE=4 SV=1;tr|A0A287B519|A0A287B519_PIG Uncharacterized protein OS=Sus scrofa OX=9823 GN=WDR60 PE=4 SV=1;tr|A0A4X1TSX7|A0A4X1TSX7_PIG Uncharacterized prot	5	2	2.2	116.18	1026	0.46509	0.32283	2	431120	569070	360490	26636	142430	22394	0	0	0	0	0	0	0	0	0
A0A4X1SG13	WD repeat-containing protein 55	tr|A0A4X1SG13|A0A4X1SG13_PIG WD repeat-containing protein 55 OS=Sus scrofa OX=9823 GN=WDR55 PE=3 SV=1;tr|F1RGE2|F1RGE2_PIG WD repeat-containing protein 55 OS=Sus scrofa OX=9823 GN=WDR55 PE=3 SV=3	2	2	9.6	46.764	429	0.07874	1.0193	1	352150	459360	98201	0	0	0	0	0	0	0	0	0	654380	204610	287620
A0A480MCR0	WD repeat-containing protein 35 isoform 2	tr|A0A480MCR0|A0A480MCR0_PIG WD repeat-containing protein 35 isoform 2 OS=Sus scrofa OX=9823 PE=4 SV=1;tr|A0A5G2QI77|A0A5G2QI77_PIG WD repeat domain 35 OS=Sus scrofa OX=9823 GN=WDR35 PE=4 SV=1;tr|A0A287A2F8|A0A287A2F8_PIG WD repeat domain 35 OS=Sus scrofa	13	1	1.7	71.285	634	0.34695	0.46032	1	439473	191020	1792980	0	0	0	0	0	0	0	0	0	0	0	0
F1S6R5	WD repeat-containing protein 18	tr|F1S6R5|F1S6R5_PIG WD repeat-containing protein 18 OS=Sus scrofa OX=9823 GN=WDR18 PE=3 SV=1;tr|A0A4X1VV69|A0A4X1VV69_PIG WD repeat-containing protein 18 OS=Sus scrofa OX=9823 PE=3 SV=1	2	1	2.8	47.476	432	0.65104	0.07796	1	41948	8089	18950	0	0	0	0	0	0	0	0	0	0	0	0
A0A4X1T6I7	WD repeat domain phosphoinositide-interacting protein 4	tr|A0A4X1T6I7|A0A4X1T6I7_PIG WD repeat domain phosphoinositide-interacting protein 4 OS=Sus scrofa OX=9823 PE=3 SV=1	1	1	3.6	27.47	250	0.61973	0.14623	3	44574	70581	16272	1480400	2480100	2442100	1544800	1568000	1544200	0	0	0	205090	285080	253900
F2Z5U3	WD repeat domain 82	tr|F2Z5U3|F2Z5U3_PIG WD repeat domain 82 OS=Sus scrofa OX=9823 GN=WDR82 PE=1 SV=2;tr|A0A4X1VQG0|A0A4X1VQG0_PIG WD_REPEATS_REGION domain-containing protein OS=Sus scrofa OX=9823 GN=WDR82 PE=3 SV=1	2	1	7	34.957	313	0.5777	0.20698	1	0	0	0	0	0	0	134370	111650	303880	0	0	0	0	0	0
F1S1X8	WD repeat domain 7	tr|F1S1X8|F1S1X8_PIG WD repeat domain 7 OS=Sus scrofa OX=9823 GN=WDR7 PE=1 SV=3;tr|A0A4X1U2H5|A0A4X1U2H5_PIG Uncharacterized protein OS=Sus scrofa OX=9823 GN=WDR7 PE=4 SV=1;tr|A0A4X1U2G0|A0A4X1U2G0_PIG Uncharacterized protein OS=Sus scrofa OX=9823 GN=WDR7	7	1	0.7	152.25	1380	0.64658	0.097842	1	54221	86402	28620	0	0	0	0	0	0	0	0	0	0	0	0
A0A5G2RFS8	WD repeat domain 5	tr|A0A5G2RFS8|A0A5G2RFS8_PIG WD repeat domain 5 OS=Sus scrofa OX=9823 GN=WDR5 PE=1 SV=1;tr|A0A4X1SWB3|A0A4X1SWB3_PIG WD_REPEATS_REGION domain-containing protein OS=Sus scrofa OX=9823 GN=WDR5 PE=4 SV=1	2	1	2.1	41.184	389	0.64012	0.10509	1	0	0	0	0	0	0	45542	33415	14326	0	0	0	0	0	0
A0A286ZME6	WD repeat domain 17	tr|A0A286ZME6|A0A286ZME6_PIG WD repeat domain 17 OS=Sus scrofa OX=9823 GN=WDR17 PE=1 SV=1;tr|A0A4X1VS96|A0A4X1VS96_PIG Uncharacterized protein OS=Sus scrofa OX=9823 GN=WDR17 PE=4 SV=1;tr|A0A287B089|A0A287B089_PIG WD repeat domain 17 OS=Sus scrofa OX=9823 G	11	1	1.2	128.48	1146	0.64846	0.09133	1	0	0	0	0	0	0	0	0	0	437470	452320	587940	0	0	0
F1S3Z9	WD repeat domain 11	tr|F1S3Z9|F1S3Z9_PIG WD repeat domain 11 OS=Sus scrofa OX=9823 GN=WDR11 PE=1 SV=3;tr|A0A5G2QMU0|A0A5G2QMU0_PIG WD repeat domain 11 OS=Sus scrofa OX=9823 GN=WDR11 PE=1 SV=1;tr|A0A4X1SRS3|A0A4X1SRS3_PIG Uncharacterized protein OS=Sus scrofa OX=9823 GN=WDR11	5	1	0.8	133.61	1199	0.65082	0.076968	1	0	0	0	23895	136500	28468	0	0	0	0	0	0	0	0	0
A0A5G2R8D7	WD repeat domain 1	tr|A0A5G2R8D7|A0A5G2R8D7_PIG WD repeat domain 1 OS=Sus scrofa OX=9823 GN=WDR1 PE=4 SV=1;tr|A0A4X1SGJ0|A0A4X1SGJ0_PIG WD_REPEATS_REGION domain-containing protein OS=Sus scrofa OX=9823 GN=WDR1 PE=4 SV=1;tr|A0A480HAE4|A0A480HAE4_PIG WD repeat-containing prote	7	3	8.7	59.512	551	0.0017889	3.6545	16	281310	513730	493046	301900	182020	438160	302160	230650	388590	0	0	0	58603	75365	63150
A0A5G2RBC9	WD repeat and SOCS box containing 2	tr|A0A5G2RBC9|A0A5G2RBC9_PIG WD repeat and SOCS box containing 2 OS=Sus scrofa OX=9823 GN=WSB2 PE=4 SV=1;tr|F1RKG5|F1RKG5_PIG WD repeat and SOCS box containing 2 OS=Sus scrofa OX=9823 GN=WSB2 PE=4 SV=2;tr|A0A4X1TQN4|A0A4X1TQN4_PIG Uncharacterized protein O	3	1	4.2	45.663	407	0.32573	0.49674	1	0	0	0	0	0	0	195330	189980	134780	230470	106630	188110	0	0	0
A0A287AK72	WASP actin nucleation promoting factor	tr|A0A287AK72|A0A287AK72_PIG WASP actin nucleation promoting factor OS=Sus scrofa OX=9823 GN=WAS PE=4 SV=1;tr|A0A4X1VJ38|A0A4X1VJ38_PIG Uncharacterized protein OS=Sus scrofa OX=9823 PE=4 SV=1;tr|A0A286ZTG3|A0A286ZTG3_PIG WASP actin nucleation promoting fac	4	1	1.7	49.885	473	0.37071	0.43498	1	0	0	0	0	0	0	47295	70419	76190	0	0	0	0	0	0
A0A480KQW2	WASH complex subunit 2A isoform 1	tr|A0A480KQW2|A0A480KQW2_PIG WASH complex subunit 2A isoform 1 OS=Sus scrofa OX=9823 PE=4 SV=1;tr|A0A4X1VAB2|A0A4X1VAB2_PIG CAP-ZIP_m domain-containing protein OS=Sus scrofa OX=9823 GN=LOC100522401 PE=4 SV=1;tr|A0A5G2QJ50|A0A5G2QJ50_PIG CAP-ZIP_m domain-co	17	1	1.3	107.27	966	0.55609	0.2247	1	0	0	0	0	0	0	0	0	0	58344	36423	77588	0	0	0
A0A4X1TZG2	WAP domain-containing protein	tr|A0A4X1TZG2|A0A4X1TZG2_PIG WAP domain-containing protein OS=Sus scrofa OX=9823 PE=4 SV=1	1	1	11.8	17.199	161	0.66021	0.034641	1	0	0	0	0	0	0	150860	137590	655010	0	0	0	0	0	0
A0A4X1TA57	VWFC domain-containing protein	tr|A0A4X1TA57|A0A4X1TA57_PIG VWFC domain-containing protein OS=Sus scrofa OX=9823 PE=4 SV=1;tr|F1SF29|F1SF29_PIG Brorin OS=Sus scrofa OX=9823 GN=VWC2 PE=4 SV=2	2	1	4.3	34.996	324	0.35496	0.4501	1	0	0	0	390978	219098	277620	0	0	0	0	0	0	0	0	0
A0A5G2QY22	VWFA domain-containing protein	tr|A0A5G2QY22|A0A5G2QY22_PIG VWFA domain-containing protein OS=Sus scrofa OX=9823 PE=3 SV=1;tr|A0A4X1VH41|A0A4X1VH41_PIG VWFA domain-containing protein OS=Sus scrofa OX=9823 GN=ANTXRL PE=3 SV=1	2	1	7.2	22.906	208	0.40404	0.39574	1	87865	201643	31421	154677	78087	102898	50660	75785	23723	231160	106710	188900	120740	600460	560860
A0A287BJB2	VRK serine/threonine kinase 1	tr|A0A287BJB2|A0A287BJB2_PIG VRK serine/threonine kinase 1 OS=Sus scrofa OX=9823 GN=VRK1 PE=1 SV=2;tr|F1SAQ6|F1SAQ6_PIG VRK serine/threonine kinase 1 OS=Sus scrofa OX=9823 GN=VRK1 PE=1 SV=3	2	1	7.3	45.1	396	0.0026316	12.352	2	0	0	0	20455	26690	38980	74970	58664	77326	0	0	0	0	0	0
A0A4X1TB22	VPS9 domain-containing protein	tr|A0A4X1TB22|A0A4X1TB22_PIG VPS9 domain-containing protein OS=Sus scrofa OX=9823 GN=VPS9D1 PE=4 SV=1;tr|A0A480T4R1|A0A480T4R1_PIG VPS9 domain-containing protein 1 OS=Sus scrofa OX=9823 PE=4 SV=1;tr|A0A481D968|A0A481D968_PIG VPS9 domain-containing protein	6	1	2.6	70.608	649	0.1616	0.76613	1	0	0	0	0	0	0	0	0	0	566220	872890	1159600	0	0	0
I3LK39	VPS50 subunit of EARP/GARPII complex	tr|I3LK39|I3LK39_PIG VPS50 subunit of EARP/GARPII complex OS=Sus scrofa OX=9823 GN=VPS50 PE=4 SV=3	1	1	1.1	100.41	871	0.64577	0.098397	1	0	0	0	0	0	0	44277	33028	13247	0	0	0	0	0	0
F1REY0	VPS37B subunit of ESCRT-I	tr|F1REY0|F1REY0_PIG VPS37B subunit of ESCRT-I OS=Sus scrofa OX=9823 GN=VPS37B PE=1 SV=2	1	1	4.2	35.786	331	0.078553	1.0266	1	0	0	0	0	0	0	299390	624920	251440	0	0	0	0	0	0
A0A5G2R5E1	VPS35 endosomal protein-sorting factor-like	tr|A0A5G2R5E1|A0A5G2R5E1_PIG VPS35 endosomal protein-sorting factor-like OS=Sus scrofa OX=9823 GN=VPS35L PE=3 SV=1;tr|A0A4X1VEA4|A0A4X1VEA4_PIG VPS35 endosomal protein-sorting factor-like OS=Sus scrofa OX=9823 GN=VPS35L PE=3 SV=1;tr|I3L667|I3L667_PIG VPS35	5	2	7.7	18.747	168	0.38222	0.42118	2	59434	99730	60474	0	0	0	109410	906240	518040	0	0	0	0	0	0
F1SUG3	VPS26, retromer complex component A	tr|F1SUG3|F1SUG3_PIG VPS26, retromer complex component A OS=Sus scrofa OX=9823 GN=VPS26A PE=1 SV=4;tr|A0A5G2QWC1|A0A5G2QWC1_PIG VPS26, retromer complex component A OS=Sus scrofa OX=9823 GN=VPS26A PE=1 SV=1;tr|A0A4X1TL10|A0A4X1TL10_PIG Uncharacterized prote	8	1	7.7	32.353	274	0.55847	0.22282	1	0	0	0	0	0	0	57084	86266	39135	0	0	0	0	0	0
A0A5G2QA49	von Willebrand factor A domain containing 8	tr|A0A5G2QA49|A0A5G2QA49_PIG von Willebrand factor A domain containing 8 OS=Sus scrofa OX=9823 GN=VWA8 PE=1 SV=1;tr|I3LJL2|I3LJL2_PIG von Willebrand factor A domain containing 8 OS=Sus scrofa OX=9823 GN=VWA8 PE=1 SV=2;tr|A0A4X1VGC7|A0A4X1VGC7_PIG Uncharact	8	1	1	191.73	1709	0.48152	0.30684	1	0	0	0	1837000	217292	21036	0	0	0	0	0	0	0	0	0
A0A287BMF4	von Willebrand factor A domain containing 3B	tr|A0A287BMF4|A0A287BMF4_PIG von Willebrand factor A domain containing 3B OS=Sus scrofa OX=9823 GN=VWA3B PE=4 SV=2;tr|A0A286ZNV1|A0A286ZNV1_PIG von Willebrand factor A domain containing 3B OS=Sus scrofa OX=9823 GN=VWA3B PE=4 SV=2;tr|A0A287AX32|A0A287AX32_P	4	2	4.4	51.541	458	0.17428	0.73448	2	0	0	0	65386	82916	96309	0	0	0	0	0	0	0	0	0
Q28833	von Willebrand factor (Fragment)	sp|Q28833|VWF_PIG von Willebrand factor (Fragment) OS=Sus scrofa OX=9823 GN=VWF PE=2 SV=2;tr|F5XVC2|F5XVC2_PIG von Willebrand factor OS=Sus scrofa OX=9823 GN=VWF PE=2 SV=1	2	1	0.4	272.39	2482	0.43367	0.36348	1	74181	20745	17893	0	0	0	0	0	0	0	0	0	0	0	0
A0A4X1UG12	Vomeronasal type-1 receptor	tr|A0A4X1UG12|A0A4X1UG12_PIG Vomeronasal type-1 receptor OS=Sus scrofa OX=9823 PE=3 SV=1	1	1	3.9	33.016	284	0.40423	0.39567	1	67597	25092	7758.6	0	0	0	0	0	0	0	0	0	0	0	0
A0A480M5G6	Voltage-dependent T-type calcium channel subunit alpha-1H isoform a	tr|A0A480M5G6|A0A480M5G6_PIG Voltage-dependent T-type calcium channel subunit alpha-1H isoform a OS=Sus scrofa OX=9823 PE=4 SV=1	1	1	1.1	151.86	1366	0.37255	0.43079	1	0	0	0	127750	115810	113840	0	0	0	0	0	0	0	0	0
A0A5G2RLN3	Voltage-dependent R-type calcium channel subunit alpha	tr|A0A5G2RLN3|A0A5G2RLN3_PIG Voltage-dependent R-type calcium channel subunit alpha OS=Sus scrofa OX=9823 GN=CACNA1E PE=3 SV=1;tr|A0A4X1U1E3|A0A4X1U1E3_PIG Voltage-dependent R-type calcium channel subunit alpha OS=Sus scrofa OX=9823 GN=CACNA1E PE=3 SV=1;tr	10	4	2.6	272.63	2417	0.59761	0.18432	5	45934	93984	57191	116100	139034	195780	214920	327440	166040	423470	685644	366590	0	0	0
A0A4X1SZS3	Voltage-dependent P/Q-type calcium channel subunit alpha	tr|A0A4X1SZS3|A0A4X1SZS3_PIG Voltage-dependent P/Q-type calcium channel subunit alpha OS=Sus scrofa OX=9823 PE=3 SV=1;tr|A0A4X1SYC4|A0A4X1SYC4_PIG Voltage-dependent P/Q-type calcium channel subunit alpha OS=Sus scrofa OX=9823 PE=3 SV=1;tr|A0A4X1SZG7|A0A4X1	3	2	1.1	255.23	2245	0.19912	0.64167	2	0	0	0	0	0	0	0	0	0	30030	12748	32507	203840	82231	54018
A0A480MZX4	Voltage-dependent L-type calcium channel subunit alpha	tr|A0A480MZX4|A0A480MZX4_PIG Voltage-dependent L-type calcium channel subunit alpha OS=Sus scrofa OX=9823 PE=3 SV=1;tr|A0A4X1VNT1|A0A4X1VNT1_PIG Voltage-dependent L-type calcium channel subunit alpha OS=Sus scrofa OX=9823 GN=CACNA1D PE=3 SV=1;tr|A0A4X1VL02	19	2	1	153.12	1353	0.047141	1.2199	1	0	0	0	0	0	0	508640	275370	12698	0	0	0	156880	65941	30999
Q29380	Voltage-dependent anion-selective channel protein 3	sp|Q29380|VDAC3_PIG Voltage-dependent anion-selective channel protein 3 OS=Sus scrofa OX=9823 GN=VDAC3 PE=2 SV=2;tr|A0A481D4E6|A0A481D4E6_PIG Voltage-dependent anion-selective channel protein 3 (Fragment) OS=Sus scrofa OX=9823 PE=3 SV=1;tr|F1SE26|F1SE26_PI	8	4	21.6	30.577	283	0.074208	1.0537	13	176010	88867	278100	160920	143660	141130	153910	187810	112790	117630	403700	454550	0	0	0
A0A4X1SP14	Voltage-dependent anion-selective channel protein 2	tr|A0A4X1SP14|A0A4X1SP14_PIG Voltage-dependent anion-selective channel protein 2 OS=Sus scrofa OX=9823 GN=SAMD8 PE=3 SV=1;tr|F1S2F6|F1S2F6_PIG Voltage-dependent anion-selective channel protein 2 OS=Sus scrofa OX=9823 GN=VDAC2 PE=3 SV=3;tr|A0A287B452|A0A287	3	11	48.6	31.604	294	0	121.28	99	1077700	810150	904763	1124400	644120	621580	978960	655600	769010	569180	274440	268100	142290	480430	275086
Q9MZ16	Voltage-dependent anion-selective channel protein 1	sp|Q9MZ16|VDAC1_PIG Voltage-dependent anion-selective channel protein 1 OS=Sus scrofa OX=9823 GN=VDAC1 PE=2 SV=3;tr|A0A4X1UX71|A0A4X1UX71_PIG Voltage-dependent anion-selective channel protein 1 OS=Sus scrofa OX=9823 GN=VDAC1 PE=3 SV=1;tr|A0A287AVV2|A0A287A	9	13	64.3	30.726	283	0	35.342	142	808390	1062300	1232900	725530	395270	667400	834140	832500	534360	1446400	1041100	1604480	1442000	1560300	1463300
A0A4X1TFB8	VKc domain-containing protein	tr|A0A4X1TFB8|A0A4X1TFB8_PIG VKc domain-containing protein OS=Sus scrofa OX=9823 GN=VKORC1 PE=4 SV=1;tr|A0A4X1TJK6|A0A4X1TJK6_PIG VKc domain-containing protein OS=Sus scrofa OX=9823 GN=VKORC1 PE=4 SV=1;tr|A0A4X1TJA8|A0A4X1TJA8_PIG Vitamin-K-epoxide reducta	4	1	14.1	9.9066	92	0.34543	0.46073	2	155130	104660	76038	91021	144394	129020	0	0	0	0	0	0	0	0	0
A0A5G2RI62	Vitelline membrane outer layer 1 homolog	tr|A0A5G2RI62|A0A5G2RI62_PIG Vitelline membrane outer layer 1 homolog OS=Sus scrofa OX=9823 GN=VMO1 PE=1 SV=1;tr|A0A4X1UYR2|A0A4X1UYR2_PIG Uncharacterized protein OS=Sus scrofa OX=9823 PE=4 SV=1;tr|A0A4X1UXI7|A0A4X1UXI7_PIG Uncharacterized protein OS=Sus s	3	1	7.5	25.584	239	0.53672	0.24774	1	48528	52846	144835	0	0	0	0	0	0	0	0	0	0	0	0
A0A5G2QGJ7	Vitamin D(3) 25-hydroxylase	tr|A0A5G2QGJ7|A0A5G2QGJ7_PIG Vitamin D(3) 25-hydroxylase OS=Sus scrofa OX=9823 GN=CYP2D25 PE=3 SV=1;tr|A0A4X1W522|A0A4X1W522_PIG Vitamin D(3) 25-hydroxylase OS=Sus scrofa OX=9823 GN=CYP2D25 PE=3 SV=1;tr|Q6LEL6|Q6LEL6_PIG Cytochrome P-450 OS=Sus scrofa dome	6	1	2.4	50.896	449	0.56638	0.21442	1	0	0	0	0	0	0	85663	84213	35756	0	0	0	0	0	0
A0A4X1U6N5	VIR_N domain-containing protein	tr|A0A4X1U6N5|A0A4X1U6N5_PIG VIR_N domain-containing protein OS=Sus scrofa OX=9823 GN=VIRMA PE=3 SV=1;tr|A0A287ADU7|A0A287ADU7_PIG Vir like m6A methyltransferase associated OS=Sus scrofa OX=9823 GN=VIRMA PE=1 SV=1;tr|A0A4X1U606|A0A4X1U606_PIG Uncharacteriz	8	1	0.7	196.34	1761	0.547	0.23929	1	52336	97032	55340	0	0	0	0	0	0	0	0	0	0	0	0
P02543	Vimentin	sp|P02543|VIME_PIG Vimentin OS=Sus scrofa OX=9823 GN=VIM PE=1 SV=2;tr|A0A0B8RVD8|A0A0B8RVD8_PIG Vimentin OS=Sus scrofa domesticus OX=9825 GN=VIM PE=3 SV=1;tr|A0A4X1UCE3|A0A4X1UCE3_PIG Vimentin OS=Sus scrofa OX=9823 GN=VIM PE=3 SV=1;tr|A0A5S6H025|A0A5S6H025	16	72	97	53.667	466	0	323.31	4409	44712000	37402000	35044000	14208000	13319000	12210900	19348000	21952000	26175300	6598800	7428900	6935300	14291000	14485000	16718700
A0A480PZS2	Vigilin isoform X1	tr|A0A480PZS2|A0A480PZS2_PIG Vigilin isoform X1 OS=Sus scrofa OX=9823 PE=4 SV=1;tr|B8XZY6|B8XZY6_PIG HDL binding protein (Fragment) OS=Sus scrofa OX=9823 GN=HDLBP PE=2 SV=1;tr|A0A0B8S073|A0A0B8S073_PIG High density lipoprotein binding protein OS=Sus scrofa	7	2	2.9	113.63	1022	0.0018797	4.1343	35	462560	237470	349034	83815	105190	136970	106640	102740	136760	54235	44974	69206	66820	82240	30089
A0A287B049	VGF nerve growth factor inducible	tr|A0A287B049|A0A287B049_PIG VGF nerve growth factor inducible OS=Sus scrofa OX=9823 GN=VGF PE=4 SV=2	1	17	43.7	67.15	618	0	90.174	71	1581600	1610700	1284034	0	0	0	0	0	0	0	0	0	0	0	0
I3LPB1	Vestigial like family member 1	tr|I3LPB1|I3LPB1_PIG Vestigial like family member 1 OS=Sus scrofa OX=9823 GN=VGLL1 PE=4 SV=1	1	1	4.6	26.081	241	0.65909	0.045577	1	0	0	0	78305	98617	111140	0	0	0	0	0	0	0	0	0
F1SMW4	Vesicle-fusing ATPase	tr|F1SMW4|F1SMW4_PIG Vesicle-fusing ATPase OS=Sus scrofa OX=9823 GN=VPS4B PE=1 SV=3;tr|A0A4X1TUU6|A0A4X1TUU6_PIG Vesicle-fusing ATPase OS=Sus scrofa OX=9823 GN=VPS4B PE=3 SV=1;tr|A0A4X1TUZ7|A0A4X1TUZ7_PIG Vesicle-fusing ATPase OS=Sus scrofa OX=9823 GN=VPS4	4	1	4.3	44.398	397	0.63572	0.11503	1	8325100	1080300	9597000	0	0	0	121520	178770	48158	0	0	0	100940	472740	433490
A0A5G2QSD0	Vesicle-associated membrane protein-associated protein B	tr|A0A5G2QSD0|A0A5G2QSD0_PIG Vesicle-associated membrane protein-associated protein B OS=Sus scrofa OX=9823 GN=VAPB PE=4 SV=1;tr|A0A480VA91|A0A480VA91_PIG Vesicle-associated membrane protein-associated protein B/C isoform 1 OS=Sus scrofa OX=9823 PE=4 SV=1;	6	1	16	10.972	100	0.30833	0.54287	2	255790	60448	54752	0	0	0	22284	16147	14347	0	0	0	0	0	0
A0A480QIH1	Vesicle-associated membrane protein 1	tr|A0A480QIH1|A0A480QIH1_PIG Vesicle-associated membrane protein 1 OS=Sus scrofa OX=9823 PE=4 SV=1;tr|A0A5G2QT82|A0A5G2QT82_PIG Vesicle associated membrane protein 1 OS=Sus scrofa OX=9823 GN=VAMP1 PE=1 SV=1;tr|A0A4X1UR06|A0A4X1UR06_PIG V-SNARE coiled-coil	3	1	27.1	12.812	118	0.16811	0.75106	0	0	0	0	0	0	0	30798	53995	27475	0	0	0	0	0	0
F1S6Z8	Vesicle trafficking 1	tr|F1S6Z8|F1S6Z8_PIG Vesicle trafficking 1 OS=Sus scrofa OX=9823 GN=VTA1 PE=1 SV=3;tr|A0A4X1VQ06|A0A4X1VQ06_PIG Uncharacterized protein OS=Sus scrofa OX=9823 GN=VTA1 PE=3 SV=1;tr|A0A4X1VMU3|A0A4X1VMU3_PIG Uncharacterized protein OS=Sus scrofa OX=9823 GN=VT	6	2	12.2	31.024	279	0.14997	0.78768	47	151730	98345	132047	177660	245690	257610	51249	67739	87047	276695	299408	257020	138670	164900	58042
A0A5G2RH77	Vesicle associated membrane protein 7	tr|A0A5G2RH77|A0A5G2RH77_PIG Vesicle associated membrane protein 7 OS=Sus scrofa OX=9823 GN=VAMP7 PE=1 SV=1	1	1	3.8	23.949	210	0.4972	0.2909	1	59043	98815	117073	0	0	0	0	0	0	0	0	0	0	0	0
A0A5G2QTJ4	Very-long-chain enoyl-CoA reductase	tr|A0A5G2QTJ4|A0A5G2QTJ4_PIG Very-long-chain enoyl-CoA reductase OS=Sus scrofa OX=9823 GN=TECR PE=1 SV=1;tr|A0A481C0W7|A0A481C0W7_PIG Very-long-chain enoyl-CoA reductase OS=Sus scrofa OX=9823 PE=3 SV=1;tr|A0A480J4M0|A0A480J4M0_PIG Very-long-chain enoyl-CoA	7	2	5.7	37.945	332	0.29549	0.55961	2	126890	26564	258491	0	0	0	0	0	0	42664	69855	113550	0	0	0
F1SCN0	Vav guanine nucleotide exchange factor 1	tr|F1SCN0|F1SCN0_PIG Vav guanine nucleotide exchange factor 1 OS=Sus scrofa OX=9823 GN=VAV1 PE=4 SV=3	1	2	2.6	90.459	778	0.27891	0.59228	6	0	0	0	0	0	0	0	0	0	383880	397780	232220	0	0	0
A0A4X1VIG2	VASt domain-containing protein	tr|A0A4X1VIG2|A0A4X1VIG2_PIG VASt domain-containing protein OS=Sus scrofa OX=9823 GN=GRAMD1B PE=4 SV=1;tr|A0A480NBH8|A0A480NBH8_PIG GRAM domain-containing protein 1B isoform X7 OS=Sus scrofa OX=9823 PE=4 SV=1	2	1	3	80.599	695	0.59674	0.1857	1	338530	678435	97686	0	0	0	0	0	0	0	0	0	0	0	0
F1SF06	Vasopressin V1b receptor	tr|F1SF06|F1SF06_PIG Vasopressin V1b receptor OS=Sus scrofa OX=9823 GN=AVPR1B PE=3 SV=1;tr|A0A4X1USR6|A0A4X1USR6_PIG Vasopressin V1b receptor OS=Sus scrofa OX=9823 GN=AVPR1B PE=3 SV=1	2	1	5	46.707	422	0.26733	0.61369	0	0	0	0	0	0	0	98554	109690	61814	0	0	0	0	0	0
A0A286ZJ91	Vasodilator stimulated phosphoprotein	tr|A0A286ZJ91|A0A286ZJ91_PIG Vasodilator stimulated phosphoprotein OS=Sus scrofa OX=9823 GN=VASP PE=3 SV=2;tr|A0A480YTS8|A0A480YTS8_PIG Vasodilator-stimulated phosphoprotein isoform X1 OS=Sus scrofa OX=9823 PE=3 SV=1;tr|A0A480PSS8|A0A480PSS8_PIG Vasodilato	8	5	21.1	38.398	360	0.0019011	4.2054	23	171470	174190	218570	167150	171880	354290	58695	89398	31245	77446	168019	131830	135700	121060	108430
A0A5G2QFP7	Vasoactive intestinal peptide receptor 2	tr|A0A5G2QFP7|A0A5G2QFP7_PIG Vasoactive intestinal peptide receptor 2 OS=Sus scrofa OX=9823 GN=VIPR2 PE=1 SV=1;tr|A0A4X1TSQ1|A0A4X1TSQ1_PIG G_PROTEIN_RECEP_F2_3 domain-containing protein OS=Sus scrofa OX=9823 PE=3 SV=1	2	1	4.8	23.013	210	0.58389	0.20309	1	0	0	0	0	0	0	0	0	0	63619	38004	84605	0	0	0
A0A5G2R3S0	Vascular endothelial growth factor A	tr|A0A5G2R3S0|A0A5G2R3S0_PIG Vascular endothelial growth factor A OS=Sus scrofa OX=9823 GN=VEGFA PE=3 SV=1	1	1	9.2	21.659	184	0.56532	0.21478	1	0	0	0	34717	42162	75489	0	0	0	0	0	0	0	0	0
A0A480VJW8	Valyl-tRNA synthetase	tr|A0A480VJW8|A0A480VJW8_PIG Valyl-tRNA synthetase OS=Sus scrofa OX=9823 PE=3 SV=1;tr|A0A480QZ08|A0A480QZ08_PIG Valyl-tRNA synthetase OS=Sus scrofa OX=9823 PE=3 SV=1;tr|A0A480NM38|A0A480NM38_PIG Valyl-tRNA synthetase OS=Sus scrofa OX=9823 PE=3 SV=1;tr|A0A2	9	5	6	133.91	1198	0.025959	1.4711	11	148550	122160	144921	25038	141950	20016	103930	147384	94207	68464	78462	94651	149710	86197	125200
A0A4X1VDG8	Vacuolar proton pump subunit B	tr|A0A4X1VDG8|A0A4X1VDG8_PIG Vacuolar proton pump subunit B OS=Sus scrofa OX=9823 GN=ATP6V1B2 PE=3 SV=1;tr|A0A480UKG6|A0A480UKG6_PIG Vacuolar proton pump subunit B OS=Sus scrofa OX=9823 PE=3 SV=1;tr|F1RMZ8|F1RMZ8_PIG Vacuolar proton pump subunit B OS=Sus s	6	5	12.9	56.612	511	0.0053476	1.9395	23	100530	111020	274260	99850	72299	136750	57944	77684	90485	89651	122570	233850	66232	106950	42962
A0A5G2QVR2	Vacuolar protein-sorting-associated protein 36	tr|A0A5G2QVR2|A0A5G2QVR2_PIG Vacuolar protein-sorting-associated protein 36 OS=Sus scrofa OX=9823 GN=VPS36 PE=1 SV=1;tr|A0A4X1SQ57|A0A4X1SQ57_PIG Vacuolar protein-sorting-associated protein 36 OS=Sus scrofa OX=9823 GN=VPS36 PE=3 SV=1;tr|A0A4X1SRN6|A0A4X1SR	8	2	10.7	36.875	328	0.30796	0.54155	2	18566	48911	72806	0	0	0	0	0	0	0	0	0	0	0	0
A0A480WLW7	Vacuolar protein sorting-associated protein 53 homolog	tr|A0A480WLW7|A0A480WLW7_PIG Vacuolar protein sorting-associated protein 53 homolog OS=Sus scrofa OX=9823 PE=3 SV=1;tr|A0A5G2R3G9|A0A5G2R3G9_PIG Vacuolar protein sorting-associated protein 53 homolog OS=Sus scrofa OX=9823 GN=VPS53 PE=1 SV=1;tr|A0A287BRE2|A	10	1	2.8	48.614	422	0.57541	0.208	1	0	0	0	0	0	0	31649	55528	29338	0	0	0	0	0	0
A0A480PZQ4	Vacuolar protein sorting-associated protein 52 homolog	tr|A0A480PZQ4|A0A480PZQ4_PIG Vacuolar protein sorting-associated protein 52 homolog OS=Sus scrofa OX=9823 PE=3 SV=1;tr|A0A5G2R5G5|A0A5G2R5G5_PIG Vacuolar protein sorting-associated protein 52 homolog OS=Sus scrofa OX=9823 GN=VPS52 PE=1 SV=1;tr|A0A4X1TE41|A	10	1	2	61.67	549	0.43205	0.36717	1	0	0	0	0	0	0	0	0	0	128980	39082	118030	0	0	0
A0A480JJN4	Vacuolar protein sorting-associated protein 51 homolog	tr|A0A480JJN4|A0A480JJN4_PIG Vacuolar protein sorting-associated protein 51 homolog OS=Sus scrofa OX=9823 PE=3 SV=1;tr|A0A480I2U8|A0A480I2U8_PIG Vacuolar protein sorting-associated protein 51 homolog OS=Sus scrofa OX=9823 PE=3 SV=1;tr|A0A480MMN9|A0A480MMN9	8	1	3.6	57.409	526	0.64189	0.1026	1	0	0	0	0	0	0	0	0	0	306540	134410	249830	0	0	0
A0A5G2QTZ1	Vacuolar protein sorting-associated protein 35	tr|A0A5G2QTZ1|A0A5G2QTZ1_PIG Vacuolar protein sorting-associated protein 35 OS=Sus scrofa OX=9823 GN=VPS35 PE=1 SV=1;tr|A0A4X1TX91|A0A4X1TX91_PIG Vacuolar protein sorting-associated protein 35 OS=Sus scrofa OX=9823 PE=3 SV=1	2	1	2.7	83.93	729	0.47262	0.31569	1	0	0	0	0	0	0	37424	28519	20132	0	0	0	0	0	0
A0A480W1Z3	Vacuolar protein sorting-associated protein 16 homolog isoform 1	tr|A0A480W1Z3|A0A480W1Z3_PIG Vacuolar protein sorting-associated protein 16 homolog isoform 1 OS=Sus scrofa OX=9823 PE=4 SV=1	1	1	2.8	44.821	395	0.43865	0.35352	1	0	0	0	44831	36325	61374	0	0	0	0	0	0	0	0	0
F1SAH7	Vacuolar protein sorting-associated protein 11 homolog	tr|F1SAH7|F1SAH7_PIG Vacuolar protein sorting-associated protein 11 homolog OS=Sus scrofa OX=9823 GN=VPS11 PE=1 SV=2;tr|A0A4X1SIU4|A0A4X1SIU4_PIG Vacuolar protein sorting-associated protein 11 homolog OS=Sus scrofa OX=9823 GN=VPS11 PE=3 SV=1;tr|A0A480TL67|	3	2	2.2	107.64	941	0.37238	0.42964	2	0	0	0	0	0	0	0	0	0	78631	9645.2	180140	0	0	0
A0A4X1T689	V-type proton ATPase subunit H	tr|A0A4X1T689|A0A4X1T689_PIG V-type proton ATPase subunit H OS=Sus scrofa OX=9823 GN=ATP6V1H PE=3 SV=1	1	1	3.4	51.552	443	0.59929	0.18255	1	0	0	0	0	0	0	0	0	0	0	0	0	1513200	613500	705320
A0A4X1UZN2	V-type proton ATPase subunit G	tr|A0A4X1UZN2|A0A4X1UZN2_PIG V-type proton ATPase subunit G OS=Sus scrofa OX=9823 GN=ATP6V1G1 PE=3 SV=1;tr|A0A287AKZ9|A0A287AKZ9_PIG V-type proton ATPase subunit G OS=Sus scrofa OX=9823 GN=TMEM268 PE=1 SV=1;tr|A0A4X1UZN7|A0A4X1UZN7_PIG V-type proton ATPase	8	3	30.5	13.724	118	0.0076531	1.8063	30	305540	572210	791780	214990	154970	250700	260780	420770	451480	389020	477700	466750	412850	612330	409754
A0A4X1VZ98	V-type proton ATPase subunit F	tr|A0A4X1VZ98|A0A4X1VZ98_PIG V-type proton ATPase subunit F OS=Sus scrofa OX=9823 PE=3 SV=1;tr|F1SMN6|F1SMN6_PIG V-type proton ATPase subunit F OS=Sus scrofa OX=9823 GN=ATP6V1F PE=1 SV=1	2	1	7.6	13.212	118	0.64885	0.090573	1	0	0	0	118510	55295	274220	0	0	0	0	0	0	0	0	0
A0A5G2RB60	V-type proton ATPase subunit D	tr|A0A5G2RB60|A0A5G2RB60_PIG V-type proton ATPase subunit D OS=Sus scrofa OX=9823 GN=ATP6V1D PE=1 SV=1;tr|A0A4X1U9P8|A0A4X1U9P8_PIG V-type proton ATPase subunit D OS=Sus scrofa OX=9823 GN=ATP6V1D PE=3 SV=1;tr|A0A5G2R121|A0A5G2R121_PIG V-type proton ATPase	6	1	8.1	17.412	148	0.14405	0.79636	3	0	0	0	0	0	0	89605	57036	85743	175640	389475	294830	0	0	0
A0A5G2QG16	V-type proton ATPase subunit C	tr|A0A5G2QG16|A0A5G2QG16_PIG V-type proton ATPase subunit C OS=Sus scrofa OX=9823 GN=ATP6V1C2 PE=1 SV=1;tr|A0A4X1UDP1|A0A4X1UDP1_PIG V-type proton ATPase subunit C OS=Sus scrofa OX=9823 PE=3 SV=1;tr|A0A481B8F6|A0A481B8F6_PIG V-type proton ATPase subunit C	8	1	4.7	41.521	364	0.65024	0.088263	1	0	0	0	65427	87749	96901	0	0	0	0	0	0	0	0	0
F1SUH8	V-type proton ATPase proteolipid subunit	tr|F1SUH8|F1SUH8_PIG V-type proton ATPase proteolipid subunit OS=Sus scrofa OX=9823 GN=ATP6V0C PE=3 SV=2	1	1	9.8	11.53	112	0.4547	0.33792	1	86753	185904	28655	0	0	0	0	0	0	0	0	0	0	0	0
Q29048	V-type proton ATPase catalytic subunit A	sp|Q29048|VATA_PIG V-type proton ATPase catalytic subunit A OS=Sus scrofa OX=9823 GN=ATP6V1A PE=2 SV=2	1	3	7.8	68.317	617	0.48352	0.30394	1	0	0	0	0	0	0	0	0	0	0	0	0	991230	3545500	520720
A0A4X1W2S7	V-SNARE coiled-coil homology domain-containing protein	tr|A0A4X1W2S7|A0A4X1W2S7_PIG V-SNARE coiled-coil homology domain-containing protein OS=Sus scrofa OX=9823 GN=VAMP3 PE=4 SV=1;tr|A0A4X1W7U8|A0A4X1W7U8_PIG V-SNARE coiled-coil homology domain-containing protein OS=Sus scrofa OX=9823 GN=VAMP3 PE=4 SV=1;tr|A0A	4	2	30.8	11.463	104	0.1549	0.77781	4	88905	193080	1843700	0	0	0	0	0	0	0	0	0	0	0	0
I3LS91	V-set and transmembrane domain containing 2A	tr|I3LS91|I3LS91_PIG V-set and transmembrane domain containing 2A OS=Sus scrofa OX=9823 GN=VSTM2A PE=4 SV=3;tr|F1SF08|F1SF08_PIG V-set and transmembrane domain containing 2A OS=Sus scrofa OX=9823 GN=VSTM2A PE=4 SV=4;tr|A0A4X1T902|A0A4X1T902_PIG Ig-like dom	7	2	14.3	25.022	230	0.30479	0.54684	2	22493	51233	6623.9	0	0	0	0	0	0	49121	60215	96718	0	0	0
I3L926	V-set and immunoglobulin domain containing 8	tr|I3L926|I3L926_PIG V-set and immunoglobulin domain containing 8 OS=Sus scrofa OX=9823 GN=VSIG8 PE=1 SV=3;tr|A0A5G2QQS4|A0A5G2QQS4_PIG V-set and immunoglobulin domain containing 8 OS=Sus scrofa OX=9823 GN=VSIG8 PE=1 SV=1;tr|A0A4X1VV10|A0A4X1VV10_PIG Uncha	3	1	4	40.448	373	0.64019	0.1049	1	210273	577830	483864	0	0	0	0	0	0	0	0	0	0	0	0
F1RP94	V-set and immunoglobulin domain containing 10 like	tr|F1RP94|F1RP94_PIG V-set and immunoglobulin domain containing 10 like OS=Sus scrofa OX=9823 GN=VSIG10L PE=1 SV=3;tr|A0A4X1VMR9|A0A4X1VMR9_PIG Uncharacterized protein OS=Sus scrofa OX=9823 PE=4 SV=1;tr|A0A287BNK5|A0A287BNK5_PIG V-set and immunoglobulin do	4	1	1.6	90.589	858	0.63268	0.12245	1	0	0	0	0	0	0	868010	664930	165470	0	0	0	0	0	0
A0A287AKH9	Uveal autoantigen with coiled-coil domains and ankyrin repeats	tr|A0A287AKH9|A0A287AKH9_PIG Uveal autoantigen with coiled-coil domains and ankyrin repeats OS=Sus scrofa OX=9823 GN=UACA PE=1 SV=2	1	1	1.2	150.01	1298	0.43876	0.35291	1	0	0	0	0	0	0	0	0	0	1732300	1469100	1937200	0	0	0
A0A480VX00	UTP--glucose-1-phosphate uridylyltransferase isoform a	tr|A0A480VX00|A0A480VX00_PIG UTP--glucose-1-phosphate uridylyltransferase isoform a OS=Sus scrofa OX=9823 PE=4 SV=1;sp|P79303|UGPA_PIG UTP--glucose-1-phosphate uridylyltransferase OS=Sus scrofa OX=9823 GN=UGP2 PE=2 SV=3;tr|A0A4X1W5E9|A0A4X1W5E9_PIG UTP--gl	7	2	6.8	34.915	307	0.1681	0.7468	2	268750	508190	301430	0	0	0	0	0	0	0	0	0	628800	196970	266430
A0A4X1TQ15	USP1-associated factor 1	tr|A0A4X1TQ15|A0A4X1TQ15_PIG USP1-associated factor 1 OS=Sus scrofa OX=9823 GN=WDR48 PE=3 SV=1;tr|A0A287BFD4|A0A287BFD4_PIG USP1-associated factor 1 OS=Sus scrofa OX=9823 GN=WDR48 PE=1 SV=1;tr|A0A4X1TUZ9|A0A4X1TUZ9_PIG USP1-associated factor 1 OS=Sus scrof	10	1	1.7	70.758	630	0.6523	0.075011	1	0	0	0	0	0	0	0	0	0	1243000	1069200	1405900	0	0	0
A0A4X1UJ48	USP domain-containing protein	tr|A0A4X1UJ48|A0A4X1UJ48_PIG USP domain-containing protein OS=Sus scrofa OX=9823 GN=USP25 PE=4 SV=1	1	1	2.4	125.59	1086	0.52648	0.26303	2	483150	311036	420465	177110	230283	278250	0	0	0	47270	31556	82517	0	0	0
A0A287AZ09	USO1 vesicle transport factor	tr|A0A287AZ09|A0A287AZ09_PIG USO1 vesicle transport factor OS=Sus scrofa OX=9823 GN=USO1 PE=1 SV=1;tr|A0A287AJL0|A0A287AJL0_PIG USO1 vesicle transport factor OS=Sus scrofa OX=9823 GN=USO1 PE=1 SV=2;tr|A0A4X1T1W0|A0A4X1T1W0_PIG Uncharacterized protein OS=Su	10	1	1.7	97.158	861	0.13731	0.81753	6	31674	74825	158680	39763	66432	72557	0	0	0	0	0	0	0	0	0
A0A287B6R5	Usherin	tr|A0A287B6R5|A0A287B6R5_PIG Usherin OS=Sus scrofa OX=9823 GN=USH2A PE=4 SV=2;tr|A0A4X1TPG8|A0A4X1TPG8_PIG Uncharacterized protein OS=Sus scrofa OX=9823 PE=4 SV=1	2	2	1.7	169.91	1544	0.18727	0.68331	5	68846	75934	59605	0	0	0	26370	36209	11610	0	0	0	0	0	0
F1RVV1	USH1 protein network component sans	tr|F1RVV1|F1RVV1_PIG USH1 protein network component sans OS=Sus scrofa OX=9823 GN=USH1G PE=4 SV=2;tr|A0A4X1SGT8|A0A4X1SGT8_PIG ANK_REP_REGION domain-containing protein OS=Sus scrofa OX=9823 GN=USH1G PE=4 SV=1	2	1	2.6	51.591	461	0.3409	0.46523	1	23310	50375	7140.2	0	0	0	0	0	0	0	0	0	0	0	0
A0A5G2QTM6	USE1-like protein	tr|A0A5G2QTM6|A0A5G2QTM6_PIG USE1-like protein OS=Sus scrofa OX=9823 GN=USE1 PE=1 SV=1;tr|A0A5G2QRP2|A0A5G2QRP2_PIG USE1-like protein OS=Sus scrofa OX=9823 GN=USE1 PE=1 SV=1;tr|A0A4X1UJD3|A0A4X1UJD3_PIG USE1-like protein OS=Sus scrofa OX=9823 GN=USE1 PE=3	9	1	11	15.205	136	0.66435	0.016605	1	0	0	0	0	0	0	230170	568790	210600	0	0	0	0	0	0
A0A5G2QH64	Urokinase plasminogen activator surface receptor	tr|A0A5G2QH64|A0A5G2QH64_PIG Urokinase plasminogen activator surface receptor OS=Sus scrofa OX=9823 GN=PLAUR PE=4 SV=1;tr|A0A5G2RLW7|A0A5G2RLW7_PIG Urokinase plasminogen activator surface receptor OS=Sus scrofa OX=9823 GN=PLAUR PE=4 SV=1;tr|A0A287B9N1|A0A2	4	1	6	30.663	281	0.47572	0.31383	1	78209	112430	208720	0	0	0	0	0	0	0	0	0	0	0	0
A0A5G2R1J1	Uridine/cytidine kinase	tr|A0A5G2R1J1|A0A5G2R1J1_PIG Uridine/cytidine kinase OS=Sus scrofa OX=9823 GN=UCK1 PE=1 SV=1;tr|A0A4X1T8G6|A0A4X1T8G6_PIG Uridine/cytidine kinase OS=Sus scrofa OX=9823 GN=UCK1 PE=3 SV=1;tr|F1S0W2|F1S0W2_PIG Uridine-cytidine kinase OS=Sus scrofa OX=9823 GN=	4	1	7.1	28.292	252	0.66477	0.012783	1	0	0	0	0	0	0	100000	195790	94063	0	0	0	0	0	0
A0A5G2R304	URI1 prefoldin like chaperone	tr|A0A5G2R304|A0A5G2R304_PIG URI1 prefoldin like chaperone OS=Sus scrofa OX=9823 GN=URI1 PE=4 SV=1;tr|A0A5G2QPM6|A0A5G2QPM6_PIG URI1 prefoldin like chaperone OS=Sus scrofa OX=9823 GN=URI1 PE=4 SV=1;tr|A0A480JVM7|A0A480JVM7_PIG Unconventional prefoldin RPB5	5	3	6.1	53.328	478	0.28021	0.59053	3	67950	108540	153360	0	0	0	0	0	0	509920	230850	300190	0	0	0
A0A287ARM7	Urea transporter	tr|A0A287ARM7|A0A287ARM7_PIG Urea transporter OS=Sus scrofa OX=9823 GN=SLC14A1 PE=3 SV=2	1	1	2.9	45.314	414	0.11872	0.86774	1	0	0	0	0	0	0	525340	394640	509570	0	0	0	0	0	0
A0A287B3N7	URB2 ribosome biogenesis homolog	tr|A0A287B3N7|A0A287B3N7_PIG URB2 ribosome biogenesis homolog OS=Sus scrofa OX=9823 GN=URB2 PE=4 SV=2;tr|A0A287BQ67|A0A287BQ67_PIG URB2 ribosome biogenesis homolog OS=Sus scrofa OX=9823 GN=URB2 PE=4 SV=2	2	1	1.1	139.91	1257	0.56485	0.21663	2	0	0	0	0	0	0	228670	260350	143400	282120	335760	284650	0	0	0
A0A286ZYB9	URB1 ribosome biogenesis homolog	tr|A0A286ZYB9|A0A286ZYB9_PIG URB1 ribosome biogenesis homolog OS=Sus scrofa OX=9823 GN=URB1 PE=4 SV=2;tr|A0A481C2B2|A0A481C2B2_PIG Nucleolar pre-ribosomal-associated protein 1 OS=Sus scrofa OX=9823 PE=4 SV=1;tr|A0A481AZV5|A0A481AZV5_PIG Nucleolar pre-ribos	4	1	0.4	250.95	2255	0.63945	0.10773	1	0	0	0	134280	269430	163550	0	0	0	0	0	0	0	0	0
I3LNG6	UPF3A regulator of nonsense mediated mRNA decay	tr|I3LNG6|I3LNG6_PIG UPF3A regulator of nonsense mediated mRNA decay OS=Sus scrofa OX=9823 GN=UPF3A PE=4 SV=3;tr|A0A5G2QUW3|A0A5G2QUW3_PIG UPF3A regulator of nonsense mediated mRNA decay OS=Sus scrofa OX=9823 GN=UPF3A PE=4 SV=1;tr|A0A5G2RFN5|A0A5G2RFN5_PIG	9	1	5.2	33.252	289	0.65094	0.077938	1	0	0	0	481940	32294	62627	0	0	0	0	0	0	0	0	0
A0A4X1W3F4	UPAR/Ly6 domain-containing protein	tr|A0A4X1W3F4|A0A4X1W3F4_PIG UPAR/Ly6 domain-containing protein OS=Sus scrofa OX=9823 GN=LYPD4 PE=4 SV=1	1	1	3.3	30.191	275	0.45726	0.33211	1	134820	40374	66855	0	0	0	0	0	0	236380	180190	301740	50407	25452	23361
A0A480ZIM0	Unconventional myosin-VIIb isoform X3	tr|A0A480ZIM0|A0A480ZIM0_PIG Unconventional myosin-VIIb isoform X3 OS=Sus scrofa OX=9823 PE=3 SV=1;tr|A0A480JA70|A0A480JA70_PIG Unconventional myosin-VIIb OS=Sus scrofa OX=9823 PE=3 SV=1;tr|A0A4X1VTK2|A0A4X1VTK2_PIG Uncharacterized protein OS=Sus scrofa OX	6	1	0.5	164.55	1447	0.26397	0.61745	0	35222	66403	12908	0	0	0	0	0	0	0	0	0	0	0	0
A0A481BFA3	Unconventional myosin-Ic isoform a	tr|A0A481BFA3|A0A481BFA3_PIG Unconventional myosin-Ic isoform a OS=Sus scrofa OX=9823 PE=3 SV=1;tr|A0A480N643|A0A480N643_PIG Unconventional myosin-Ic isoform b OS=Sus scrofa OX=9823 PE=3 SV=1;tr|A0A4X1U622|A0A4X1U622_PIG Uncharacterized protein OS=Sus scro	12	1	0.9	109.79	951	0.51175	0.27634	1	344930	177750	1103740	0	0	0	0	0	0	0	0	0	0	0	0
A0A480NEC8	Unconventional myosin-Ib isoform 5	tr|A0A480NEC8|A0A480NEC8_PIG Unconventional myosin-Ib isoform 5 OS=Sus scrofa OX=9823 PE=3 SV=1;tr|A0A480ITR5|A0A480ITR5_PIG Unconventional myosin-Ib isoform 4 OS=Sus scrofa OX=9823 PE=3 SV=1;tr|A0A480IT90|A0A480IT90_PIG Unconventional myosin-Ib isoform 5	14	1	2	81.153	707	0.42687	0.37396	1	67411	306770	3003743	0	0	0	0	0	0	0	0	0	0	0	0
A0A480PMA8	Uncharacterized zinc finger protein 814	tr|A0A480PMA8|A0A480PMA8_PIG Uncharacterized zinc finger protein 814 OS=Sus scrofa OX=9823 PE=4 SV=1;tr|A0A480PL27|A0A480PL27_PIG Uncharacterized zinc finger protein 814 OS=Sus scrofa OX=9823 PE=4 SV=1;tr|A0A287BRP8|A0A287BRP8_PIG Uncharacterized protein O	5	2	3.5	86.508	746	0.17194	0.74197	5	0	0	0	706930	733430	1093000	0	0	0	1908500	1832600	1576500	0	0	0
A0A480MWJ4	Uncharacterized protein KIAA1755 isoform X6-like	tr|A0A480MWJ4|A0A480MWJ4_PIG Uncharacterized protein KIAA1755 isoform X6-like OS=Sus scrofa OX=9823 PE=4 SV=1	1	1	2.1	42.052	383	0.63754	0.10894	1	0	0	0	40355	199230	29635	0	0	0	0	0	0	0	0	0
A0A480M6A3	Uncharacterized protein KIAA1109 isoform X12-like	tr|A0A480M6A3|A0A480M6A3_PIG Uncharacterized protein KIAA1109 isoform X12-like OS=Sus scrofa OX=9823 PE=4 SV=1;tr|A0A480KLL4|A0A480KLL4_PIG Uncharacterized protein KIAA1109 isoform X5 OS=Sus scrofa OX=9823 PE=4 SV=1;tr|A0A4X1VBN0|A0A4X1VBN0_PIG FSA_C domai	15	1	1.2	176.93	1601	0.64272	0.10057	1	20263	42288	25748	0	0	0	0	0	0	0	0	0	0	0	0
A0A480I5R8	Uncharacterized protein C19orf60 homolog isoform X2	tr|A0A480I5R8|A0A480I5R8_PIG Uncharacterized protein C19orf60 homolog isoform X2 OS=Sus scrofa OX=9823 PE=4 SV=1	1	1	9.6	13.781	125	0.66049	0.025539	1	0	0	0	0	0	0	119660	201270	108360	0	0	0	0	0	0
A0A480UV19	Uncharacterized protein C10orf88	tr|A0A480UV19|A0A480UV19_PIG Uncharacterized protein C10orf88 OS=Sus scrofa OX=9823 PE=4 SV=1;tr|I3LBP2|I3LBP2_PIG Uncharacterized protein OS=Sus scrofa OX=9823 GN=LOC100154423 PE=4 SV=2;tr|F1SEE6|F1SEE6_PIG Uncharacterized protein OS=Sus scrofa OX=9823 GN	4	1	3.1	37.915	355	0.48167	0.30647	1	0	0	0	0	0	0	0	0	0	65504	55279	100480	0	0	0
A0A4X1UUP9	UNC80 domain-containing protein	tr|A0A4X1UUP9|A0A4X1UUP9_PIG UNC80 domain-containing protein OS=Sus scrofa OX=9823 GN=UNC80 PE=4 SV=1;tr|A0A4X1UWP4|A0A4X1UWP4_PIG UNC80 domain-containing protein OS=Sus scrofa OX=9823 GN=UNC80 PE=4 SV=1;tr|F1SSS4|F1SSS4_PIG Unc-80 homolog, NALCN channel c	4	3	1.3	360.43	3233	0.0056818	2.1904	3	328988	442050	879976	0	0	0	0	0	0	0	0	0	0	0	0
F1RX80	Unc-5 netrin receptor D	tr|F1RX80|F1RX80_PIG Unc-5 netrin receptor D OS=Sus scrofa OX=9823 GN=UNC5D PE=3 SV=4;tr|A0A4X1VUU2|A0A4X1VUU2_PIG Netrin receptor UNC5 OS=Sus scrofa OX=9823 PE=3 SV=1;tr|A0A4X1VQ03|A0A4X1VQ03_PIG Netrin receptor UNC5 OS=Sus scrofa OX=9823 PE=3 SV=1;tr|A0A	8	1	2.6	55.282	493	0.52915	0.25788	1	0	0	0	0	0	0	0	0	0	97713	88441	320300	0	0	0
A0A4X1UFN4	UmuC domain-containing protein	tr|A0A4X1UFN4|A0A4X1UFN4_PIG UmuC domain-containing protein OS=Sus scrofa OX=9823 GN=POLI PE=3 SV=1;tr|F1S1Z7|F1S1Z7_PIG DNA polymerase iota OS=Sus scrofa OX=9823 GN=POLI PE=4 SV=4;tr|A0A4X1UGF9|A0A4X1UGF9_PIG UmuC domain-containing protein OS=Sus scrofa O	6	1	2	71.656	638	0.59254	0.1932	1	0	0	0	58532	281510	59311	0	0	0	0	0	0	0	0	0
A0A4X1WAE0	UMP-CMP kinase	tr|A0A4X1WAE0|A0A4X1WAE0_PIG UMP-CMP kinase OS=Sus scrofa OX=9823 GN=CMPK1 PE=3 SV=1;sp|Q29561|KCY_PIG UMP-CMP kinase OS=Sus scrofa OX=9823 GN=CMPK1 PE=1 SV=1;tr|A0A5G2QCQ6|A0A5G2QCQ6_PIG Nucleoside-diphosphate kinase OS=Sus scrofa OX=9823 GN=CMPK1 PE=1 SV	8	3	20.8	21.717	192	0	29.523	8	0	0	0	118520	200384	232170	53253	133350	86085	70456	68502	126640	49792	73537	84973
A0A4X1UYP0	ULP_PROTEASE domain-containing protein	tr|A0A4X1UYP0|A0A4X1UYP0_PIG ULP_PROTEASE domain-containing protein OS=Sus scrofa OX=9823 GN=SENP6 PE=3 SV=1;tr|A0A287BKF9|A0A287BKF9_PIG SUMO specific peptidase 6 OS=Sus scrofa OX=9823 GN=SENP6 PE=3 SV=1;tr|A0A4X1UYB9|A0A4X1UYB9_PIG ULP_PROTEASE domain-co	5	1	1.9	124.95	1105	0.54953	0.23566	1	0	0	0	0	0	0	62132	74895	77882	0	0	0	0	0	0
A0A480Z418	UHRF1-binding protein 1	tr|A0A480Z418|A0A480Z418_PIG UHRF1-binding protein 1 OS=Sus scrofa OX=9823 PE=4 SV=1;tr|A0A480W3X6|A0A480W3X6_PIG UHRF1-binding protein 1 OS=Sus scrofa OX=9823 PE=4 SV=1	2	1	1.1	156.17	1414	0.62422	0.13964	1	0	0	0	230040	6953.8	9526.3	0	0	0	0	0	0	0	0	0
A0A5G2QWK3	UFM1-activating enzyme	tr|A0A5G2QWK3|A0A5G2QWK3_PIG UFM1-activating enzyme OS=Sus scrofa OX=9823 GN=UBA5 PE=1 SV=1;tr|A0A5G2RKR2|A0A5G2RKR2_PIG UFM1-activating enzyme OS=Sus scrofa OX=9823 GN=UBA5 PE=1 SV=1;tr|A0A287ATP9|A0A287ATP9_PIG UFM1-activating enzyme OS=Sus scrofa OX=982	5	1	2.9	38.874	347	0.53503	0.24989	1	0	0	0	0	0	0	0	0	0	0	0	0	75377	38105	43033
A0A286ZY96	UDP-N-acetylglucosamine--peptide N-acetylglucosaminyltransferase 110 kDa subunit	tr|A0A286ZY96|A0A286ZY96_PIG UDP-N-acetylglucosamine--peptide N-acetylglucosaminyltransferase 110 kDa subunit OS=Sus scrofa OX=9823 GN=OGT PE=4 SV=1;tr|A0A4X1W232|A0A4X1W232_PIG UDP-N-acetylglucosamine--peptide N-acetylglucosaminyltransferase 110 kDa subun	10	1	8.8	20.181	182	0.0099751	1.7341	3	39848	59974	135170	17600	20080	13846	0	0	0	0	0	0	0	0	0
Q29250	UDP-glucuronosyltransferase (Fragment)	tr|Q29250|Q29250_PIG UDP-glucuronosyltransferase (Fragment) OS=Sus scrofa OX=9823 PE=2 SV=1	1	1	14.9	11.523	101	0.21055	0.63435	0	0	0	0	0	0	0	0	0	0	0	0	0	50279	24029	22779
A0A480YR63	UDP-glucose:glycoprotein glucosyltransferase 1	tr|A0A480YR63|A0A480YR63_PIG UDP-glucose:glycoprotein glucosyltransferase 1 OS=Sus scrofa OX=9823 PE=4 SV=1;tr|A0A5G2QLB9|A0A5G2QLB9_PIG UDP-glucose glycoprotein glucosyltransferase 1 OS=Sus scrofa OX=9823 GN=UGGT1 PE=1 SV=1;tr|K9J4P3|K9J4P3_PIG UDP-glucos	9	2	2.2	140.72	1228	0.34228	0.46336	2	0	0	0	0	0	0	75094	106590	232780	120870	41694	72110	0	0	0
A0A5G2QD09	UDP-glucose glycoprotein glucosyltransferase 2	tr|A0A5G2QD09|A0A5G2QD09_PIG UDP-glucose glycoprotein glucosyltransferase 2 OS=Sus scrofa OX=9823 GN=UGGT2 PE=3 SV=1;tr|A0A480ISV2|A0A480ISV2_PIG UDP-glucose:glycoprotein glucosyltransferase 2 OS=Sus scrofa OX=9823 PE=3 SV=1;tr|A0A4X1UWP1|A0A4X1UWP1_PIG Un	5	1	0.7	167.54	1451	0.60814	0.17493	1	0	0	0	0	0	0	77350	66676	62445	0	0	0	0	0	0
A0A5G2Q7H2	UDP-glucose 6-dehydrogenase	tr|A0A5G2Q7H2|A0A5G2Q7H2_PIG UDP-glucose 6-dehydrogenase OS=Sus scrofa OX=9823 GN=UGDH PE=1 SV=1;tr|A0A4X1V3H3|A0A4X1V3H3_PIG UDP-glucose 6-dehydrogenase OS=Sus scrofa OX=9823 PE=3 SV=1;tr|I3LIM2|I3LIM2_PIG UDP-glucose 6-dehydrogenase OS=Sus scrofa OX=9823	6	3	9.4	47.624	427	0.16133	0.7712	11	0	0	0	176030	165062	207950	91189	57807	59140	0	0	0	0	0	0
A0A4X1UN05	UDENN FNIP1/2-type domain-containing protein	tr|A0A4X1UN05|A0A4X1UN05_PIG UDENN FNIP1/2-type domain-containing protein OS=Sus scrofa OX=9823 GN=FNIP1 PE=3 SV=1	1	1	0.8	135.44	1217	0.45528	0.3388	1	0	0	0	168670	86903	67784	0	0	0	0	0	0	0	0	0
A0A4X1UHA4	UDENN domain-containing protein	tr|A0A4X1UHA4|A0A4X1UHA4_PIG UDENN domain-containing protein OS=Sus scrofa OX=9823 GN=DENND1A PE=4 SV=1;tr|F1SKU2|F1SKU2_PIG DENN domain containing 1A OS=Sus scrofa OX=9823 GN=DENND1A PE=4 SV=2;tr|A0A287AVA3|A0A287AVA3_PIG DENN domain containing 1A OS=Sus	17	2	2.3	118.82	1075	0.57289	0.21081	2	0	0	0	354000	19303	13445	0	0	0	260340	113070	213480	505130	172160	201150
A0A4X1WAF4	UCR_hinge domain-containing protein	tr|A0A4X1WAF4|A0A4X1WAF4_PIG UCR_hinge domain-containing protein OS=Sus scrofa OX=9823 GN=LOC100524873 PE=3 SV=1;tr|A0A480S4Z8|A0A480S4Z8_PIG Cytochrome b-c1 complex subunit 6, mitochondrial isoform 2 OS=Sus scrofa OX=9823 PE=3 SV=1;tr|F1S3W0|F1S3W0_PIG Cy	6	2	31.8	9.8993	85	0	25.135	53	434470	473790	450476	991240	1133300	998400	865550	1248500	955100	1274100	1899000	1210732	899060	1126600	683250
D2K6L7	UCP3 (Fragment)	tr|D2K6L7|D2K6L7_PIG UCP3 (Fragment) OS=Sus scrofa OX=9823 GN=UCP3 PE=3 SV=1	1	1	20	5.9548	55	0.50538	0.28376	1	0	0	0	65158	73021	86515	0	0	0	0	0	0	0	0	0
A0A4X1WA74	UBZ2-type domain-containing protein	tr|A0A4X1WA74|A0A4X1WA74_PIG UBZ2-type domain-containing protein OS=Sus scrofa OX=9823 PE=4 SV=1;tr|A0A286ZSU9|A0A286ZSU9_PIG UBZ2-type domain-containing protein OS=Sus scrofa OX=9823 PE=4 SV=1	2	1	7.7	21.031	194	0.61393	0.15725	1	0	0	0	0	0	0	105690	144500	132200	0	0	0	0	0	0
A0A4X1TXD3	UBX domain-containing protein 7	tr|A0A4X1TXD3|A0A4X1TXD3_PIG UBX domain-containing protein 7 OS=Sus scrofa OX=9823 GN=UBXN7 PE=4 SV=1	1	1	2.7	54.83	489	0.66481	0.013222	1	0	0	0	43656	26042	41281	0	0	0	0	0	0	0	0	0
A0A480VYR5	UBX domain-containing protein 1 isoform 2 (Fragment)	tr|A0A480VYR5|A0A480VYR5_PIG UBX domain-containing protein 1 isoform 2 (Fragment) OS=Sus scrofa OX=9823 PE=4 SV=1;tr|A0A5G2RBL1|A0A5G2RBL1_PIG UBX domain protein 1 OS=Sus scrofa OX=9823 GN=UBXN1 PE=1 SV=1;tr|A0A4X1VKB0|A0A4X1VKB0_PIG Uncharacterized protei	10	1	8.6	15.314	139	0.42462	0.37991	3	0	0	0	89336	90685	155400	30411	85434	21492	0	0	0	0	0	0
F1SUN3	UBX domain protein 10	tr|F1SUN3|F1SUN3_PIG UBX domain protein 10 OS=Sus scrofa OX=9823 GN=UBXN10 PE=4 SV=1;tr|A0A4X1VZH0|A0A4X1VZH0_PIG UBX domain-containing protein OS=Sus scrofa OX=9823 PE=4 SV=1	2	1	5.4	30.802	280	0.6506	0.079618	1	0	0	0	0	0	0	0	0	0	0	0	0	55820	199880	181910
F1SD54	UBR-type domain-containing protein	tr|F1SD54|F1SD54_PIG UBR-type domain-containing protein OS=Sus scrofa OX=9823 GN=UBR7 PE=4 SV=2;tr|A0A4X1SKH3|A0A4X1SKH3_PIG UBR-type domain-containing protein OS=Sus scrofa OX=9823 GN=UBR7 PE=4 SV=1	2	1	2.3	44.075	393	0.43331	0.36312	1	0	0	0	0	0	0	0	0	0	262090	234180	356000	0	0	0
A0A286ZZT2	Ubiquitinyl hydrolase 1	tr|A0A286ZZT2|A0A286ZZT2_PIG Ubiquitinyl hydrolase 1 OS=Sus scrofa OX=9823 GN=USP32 PE=4 SV=2;tr|A0A4X1SXR5|A0A4X1SXR5_PIG Ubiquitinyl hydrolase 1 OS=Sus scrofa OX=9823 GN=USP32 PE=4 SV=1;tr|A0A4X1SWG0|A0A4X1SWG0_PIG Ubiquitinyl hydrolase 1 OS=Sus scrofa O	10	3	3.1	144.01	1276	0.099588	0.94266	6	296050	2001342	71293	134300	159475	180590	30303	36806	31538	0	0	0	0	0	0
I3LQG8	Ubiquitination factor E4B	tr|I3LQG8|I3LQG8_PIG Ubiquitination factor E4B OS=Sus scrofa OX=9823 GN=UBE4B PE=3 SV=3;tr|A0A4X1W7N0|A0A4X1W7N0_PIG U-box domain-containing protein OS=Sus scrofa OX=9823 GN=UBE4B PE=3 SV=1;tr|A0A480TJQ1|A0A480TJQ1_PIG Ubiquitin conjugation factor E4 B iso	5	1	1.3	126.83	1114	0.19508	0.6554	3	0	0	0	0	0	0	2003400	5326700	3294000	13299000	11731000	13692000	0	0	0
A0A480IJV6	Ubiquitin-protein ligase E3B isoform X1	tr|A0A480IJV6|A0A480IJV6_PIG Ubiquitin-protein ligase E3B isoform X1 OS=Sus scrofa OX=9823 PE=4 SV=1;tr|A0A480GX34|A0A480GX34_PIG Ubiquitin-protein ligase E3B isoform X1 OS=Sus scrofa OX=9823 PE=4 SV=1	2	1	3.1	27.23	258	0.63993	0.10539	1	0	0	0	12930	91156	14307	0	0	0	0	0	0	0	0	0
A0A4X1UEH8	Ubiquitin-protein ligase E3A	tr|A0A4X1UEH8|A0A4X1UEH8_PIG Ubiquitin-protein ligase E3A OS=Sus scrofa OX=9823 GN=UBE3A PE=4 SV=1	1	1	2.3	100.33	874	0.0053619	1.9419	4	92950	23039	17330	168177	267920	118590	0	0	0	160020	238464	499600	660940	548973	279580
F1SUG4	Ubiquitin-like domain-containing protein	tr|F1SUG4|F1SUG4_PIG Ubiquitin-like domain-containing protein OS=Sus scrofa OX=9823 GN=ELOB PE=1 SV=1;tr|A0A4X1VUF2|A0A4X1VUF2_PIG Ubiquitin-like domain-containing protein OS=Sus scrofa OX=9823 PE=4 SV=1	2	1	7.6	13.17	118	0.44532	0.34466	2	0	0	0	82039	129004	116290	0	0	0	84669	59245	86664	0	0	0
F2Z530	Ubiquitin-fold modifier-conjugating enzyme 1	tr|F2Z530|F2Z530_PIG Ubiquitin-fold modifier-conjugating enzyme 1 OS=Sus scrofa OX=9823 GN=UFC1 PE=1 SV=1;tr|A0A4X1VSC7|A0A4X1VSC7_PIG Ubiquitin-fold modifier-conjugating enzyme 1 OS=Sus scrofa OX=9823 GN=UFC1 PE=3 SV=1	2	1	7.8	19.458	167	0.43139	0.36768	1	0	0	0	0	0	0	257240	113410	68011	0	0	0	0	0	0
A0A5K1U589	Ubiquitin-activating enzyme E1	tr|A0A5K1U589|A0A5K1U589_PIG Ubiquitin-activating enzyme E1 OS=Sus scrofa OX=9823 GN=UBA1 PE=1 SV=1;tr|A0A4X1TIB9|A0A4X1TIB9_PIG Ubiquitin-activating enzyme E1 OS=Sus scrofa OX=9823 GN=UBA1 PE=3 SV=1;tr|K7GRY0|K7GRY0_PIG Ubiquitin-activating enzyme E1 OS=S	8	9	13.9	113.71	1018	0.0022173	7.1734	44	198060	99898	132900	847460	1296990	907658	462930	164190	374780	123860	144722	264820	42612	104650	81000
A0A480ZEB3	Ubiquitin thioesterase	tr|A0A480ZEB3|A0A480ZEB3_PIG Ubiquitin thioesterase OTU1 OS=Sus scrofa OX=9823 PE=4 SV=1	1	1	3.7	38.192	348	0.66481	0.013715	1	0	0	0	0	0	0	22289	56487	36396	0	0	0	0	0	0
A0A287BBK8	Ubiquitin specific peptidase 42	tr|A0A287BBK8|A0A287BBK8_PIG Ubiquitin specific peptidase 42 OS=Sus scrofa OX=9823 GN=USP42 PE=4 SV=1	1	1	1.3	145.11	1344	0.64376	0.099778	1	0	0	0	0	0	0	132060	146380	133080	0	0	0	0	0	0
A0A5G2QX14	Ubiquitin specific peptidase 39	tr|A0A5G2QX14|A0A5G2QX14_PIG Ubiquitin specific peptidase 39 OS=Sus scrofa OX=9823 GN=USP39 PE=1 SV=1;tr|A0A4X1W5U7|A0A4X1W5U7_PIG Uncharacterized protein OS=Sus scrofa OX=9823 GN=USP39 PE=4 SV=1;tr|I3LFS1|I3LFS1_PIG Ubiquitin specific peptidase 39 OS=Sus	8	2	4.5	56.41	488	0.039378	1.2754	2	0	0	0	912790	72982	12219	66771	46003	17367	0	0	0	0	0	0
A0A287AZU3	Ubiquitin specific peptidase 28	tr|A0A287AZU3|A0A287AZU3_PIG Ubiquitin specific peptidase 28 OS=Sus scrofa OX=9823 GN=USP28 PE=1 SV=1;tr|A0A4X1T5Z8|A0A4X1T5Z8_PIG USP domain-containing protein OS=Sus scrofa OX=9823 PE=4 SV=1;tr|A0A4X1T8K4|A0A4X1T8K4_PIG USP domain-containing protein OS=S	17	2	2.7	128.08	1130	0.6078	0.1744	2	0	0	0	649620	49375	7464.7	41343	100180	186030	0	0	0	0	0	0
A0A5G2QIR4	Ubiquitin specific peptidase 15	tr|A0A5G2QIR4|A0A5G2QIR4_PIG Ubiquitin specific peptidase 15 OS=Sus scrofa OX=9823 GN=USP15 PE=3 SV=1;tr|A0A4X1W3Z9|A0A4X1W3Z9_PIG DUSP domain-containing protein OS=Sus scrofa OX=9823 GN=USP15 PE=3 SV=1;tr|A0A4X1W550|A0A4X1W550_PIG Ubiquitin carboxyl-termi	6	1	6	27.152	235	0.61437	0.15763	1	0	0	0	0	0	0	22660	8880	37306	0	0	0	0	0	0
F1RTK0	Ubiquitin specific peptidase 12	tr|F1RTK0|F1RTK0_PIG Ubiquitin specific peptidase 12 OS=Sus scrofa OX=9823 GN=USP12 PE=4 SV=3;tr|A0A4X1TJ44|A0A4X1TJ44_PIG USP domain-containing protein OS=Sus scrofa OX=9823 GN=USP12 PE=4 SV=1;tr|A0A0B8RZ07|A0A0B8RZ07_PIG Ubiquitin specific peptidase 12 O	3	1	4.1	42.867	370	0.59739	0.18445	1	0	0	0	0	0	0	0	0	0	486720	465110	644090	0	0	0
A0A287A1S4	Ubiquitin recognition factor in ER associated degradation 1	tr|A0A287A1S4|A0A287A1S4_PIG Ubiquitin recognition factor in ER associated degradation 1 OS=Sus scrofa OX=9823 GN=UFD1 PE=1 SV=1;tr|F1RK61|F1RK61_PIG Ubiquitin recognition factor in ER associated degradation 1 OS=Sus scrofa OX=9823 GN=UFD1 PE=1 SV=2;tr|A0A	10	2	8.3	37.736	338	0.0045113	2.4907	16	0	0	0	41611	46035	21433	41626	50040	131230	0	0	0	389250	1284500	260600
F1RVE8	Ubiquitin like modifier activating enzyme 6	tr|F1RVE8|F1RVE8_PIG Ubiquitin like modifier activating enzyme 6 OS=Sus scrofa OX=9823 GN=UBA6 PE=1 SV=3;tr|A0A4X1TH82|A0A4X1TH82_PIG Gonadotropin-releasing hormone receptor OS=Sus scrofa OX=9823 PE=3 SV=1;tr|A0A4X1TFF0|A0A4X1TFF0_PIG Gonadotropin-releasin	12	2	2.2	115.6	1031	0.06015	1.1172	1	1239600	1055600	1404100	0	0	0	0	0	0	0	0	0	0	0	0
A0A5G2QLM8	Ubiquitin like 3	tr|A0A5G2QLM8|A0A5G2QLM8_PIG Ubiquitin like 3 OS=Sus scrofa OX=9823 GN=UBL3 PE=1 SV=1	1	1	4	30.57	275	0.58071	0.20545	1	0	0	0	0	0	0	42229	58969	45646	0	0	0	0	0	0
A0A5G2QG79	Ubiquitin conjugating enzyme E2 W	tr|A0A5G2QG79|A0A5G2QG79_PIG Ubiquitin conjugating enzyme E2 W OS=Sus scrofa OX=9823 GN=UBE2W PE=4 SV=1	1	1	9.5	18.316	158	0.50339	0.28587	1	0	0	0	0	0	0	0	0	0	38719	45610	65637	0	0	0
A0A5G2R6G7	Ubiquitin conjugating enzyme E2 V2	tr|A0A5G2R6G7|A0A5G2R6G7_PIG Ubiquitin conjugating enzyme E2 V2 OS=Sus scrofa OX=9823 GN=UBE2V2 PE=1 SV=1;tr|I3L6T2|I3L6T2_PIG Ubiquitin conjugating enzyme E2 V2 OS=Sus scrofa OX=9823 GN=UBE2V2 PE=1 SV=2;tr|A0A4X1U9A4|A0A4X1U9A4_PIG UBC core domain-contain	8	1	14.8	16.22	142	0.64289	0.10042	1	0	0	0	0	0	0	65948	44261	15964	0	0	0	0	0	0
A0A5G2QIZ7	Ubiquitin conjugating enzyme E2 V1	tr|A0A5G2QIZ7|A0A5G2QIZ7_PIG Ubiquitin conjugating enzyme E2 V1 OS=Sus scrofa OX=9823 GN=UBE2V1 PE=1 SV=1;tr|A0A4X1UIL1|A0A4X1UIL1_PIG UBC core domain-containing protein OS=Sus scrofa OX=9823 GN=UBE2V1 PE=4 SV=1	2	1	5.9	19.216	170	0.54529	0.24078	1	0	0	0	0	0	0	231080	1178900	418250	0	0	0	0	0	0
A0A5G2QNC2	Ubiquitin conjugating enzyme E2 C	tr|A0A5G2QNC2|A0A5G2QNC2_PIG Ubiquitin conjugating enzyme E2 C OS=Sus scrofa OX=9823 GN=UBE2C PE=4 SV=1;tr|A0A4X1U0F2|A0A4X1U0F2_PIG Uncharacterized protein OS=Sus scrofa OX=9823 GN=UBE2C PE=4 SV=1;tr|A0A5G2QCU2|A0A5G2QCU2_PIG Ubiquitin conjugating enzyme	6	1	32	5.0968	50	0.37101	0.43276	2	0	0	0	227140	290372	386890	133920	108730	139470	0	0	0	0	0	0
H8Y100	Ubiquitin conjugating enzyme E2 B	tr|H8Y100|H8Y100_PIG Ubiquitin conjugating enzyme E2 B OS=Sus scrofa OX=9823 GN=UBE2B PE=2 SV=1;tr|A0A4X1UY26|A0A4X1UY26_PIG UBC core domain-containing protein OS=Sus scrofa OX=9823 GN=UBE2B PE=3 SV=1	2	1	7.9	17.312	152	0.48189	0.30491	1	0	0	0	0	0	0	532330	147420	893460	0	0	0	0	0	0
A0A4X1VSG3	Ubiquitin carboxyl-terminal hydrolase 7	tr|A0A4X1VSG3|A0A4X1VSG3_PIG Ubiquitin carboxyl-terminal hydrolase 7 OS=Sus scrofa OX=9823 GN=USP7 PE=3 SV=1	1	1	0.8	125.74	1080	0.63199	0.12495	1	43326	13901	21001	0	0	0	0	0	0	0	0	0	0	0	0
A0A480VSC8	Ubiquitin carboxyl-terminal hydrolase 48 isoform X6	tr|A0A480VSC8|A0A480VSC8_PIG Ubiquitin carboxyl-terminal hydrolase 48 isoform X6 OS=Sus scrofa OX=9823 PE=3 SV=1;tr|A0A480M6L8|A0A480M6L8_PIG Ubiquitin carboxyl-terminal hydrolase 48 isoform X3 OS=Sus scrofa OX=9823 PE=3 SV=1;tr|A0A4X1VYI8|A0A4X1VYI8_PIG U	12	1	2.1	65.612	574	0.48417	0.30355	2	0	0	0	0	0	0	0	0	0	1661800	1936400	1772100	0	0	0
A0A480MP60	Ubiquitin carboxyl-terminal hydrolase 47 isoform X2	tr|A0A480MP60|A0A480MP60_PIG Ubiquitin carboxyl-terminal hydrolase 47 isoform X2 OS=Sus scrofa OX=9823 PE=4 SV=1;tr|A0A480MLS3|A0A480MLS3_PIG Ubiquitin carboxyl-terminal hydrolase 47 isoform a OS=Sus scrofa OX=9823 PE=4 SV=1;tr|A0A480Z314|A0A480Z314_PIG Ub	10	1	0.9	133.89	1175	0.53493	0.25058	1	0	0	0	32893	173740	32234	0	0	0	0	0	0	0	0	0
A0A480XP29	Ubiquitin carboxyl-terminal hydrolase 21 isoform X3	tr|A0A480XP29|A0A480XP29_PIG Ubiquitin carboxyl-terminal hydrolase 21 isoform X3 OS=Sus scrofa OX=9823 PE=4 SV=1;tr|A0A4X1VRG6|A0A4X1VRG6_PIG USP domain-containing protein OS=Sus scrofa OX=9823 GN=USP21 PE=4 SV=1;tr|A0A480PCQ2|A0A480PCQ2_PIG Ubiquitin carb	5	1	2.6	54.842	493	0.63018	0.13199	1	0	0	0	0	0	0	100590	131300	514880	0	0	0	0	0	0
A0A5G2RGW1	Ubiquitin carboxyl-terminal hydrolase	tr|A0A5G2RGW1|A0A5G2RGW1_PIG Ubiquitin carboxyl-terminal hydrolase OS=Sus scrofa OX=9823 GN=UCHL1 PE=1 SV=1;tr|A0A4X1UYC2|A0A4X1UYC2_PIG Ubiquitin carboxyl-terminal hydrolase OS=Sus scrofa OX=9823 GN=UCHL1 PE=3 SV=1;sp|Q6SEG5|UCHL1_PIG Ubiquitin carboxyl-t	7	6	34.8	23.209	207	0	72.354	50	951510	446840	665720	1262900	1003700	1508220	353140	278600	481148	176130	251250	237710	1311500	1140000	1860300
A0A287BRL3	Ubiquitin associated protein 2 like	tr|A0A287BRL3|A0A287BRL3_PIG Ubiquitin associated protein 2 like OS=Sus scrofa OX=9823 GN=UBAP2L PE=1 SV=2;tr|A0A4X1W0G2|A0A4X1W0G2_PIG Uncharacterized protein OS=Sus scrofa OX=9823 GN=UBAP2L PE=4 SV=1;tr|A0A5G2RFH0|A0A5G2RFH0_PIG Ubiquitin associated prot	18	3	5.5	93.626	896	0.0028902	15.856	42	183700	101640	113140	200850	123080	179620	172110	286270	170380	209210	304190	249520	0	0	0
A0A5G2QU50	Ubiquitin associated protein 2	tr|A0A5G2QU50|A0A5G2QU50_PIG Ubiquitin associated protein 2 OS=Sus scrofa OX=9823 GN=UBAP2 PE=4 SV=1;tr|A0A4X1UNP5|A0A4X1UNP5_PIG Uncharacterized protein OS=Sus scrofa OX=9823 GN=UBAP2 PE=4 SV=1;tr|A0A480RRA9|A0A480RRA9_PIG Ubiquitin-associated protein 2 i	15	2	3.7	83.626	814	0.0023148	8.5729	12	0	0	0	38117	49353	66449	29050	48758	68870	19747	38022	22969	0	0	0
F1S9R5	Ubiquitin associated and SH3 domain containing B	tr|F1S9R5|F1S9R5_PIG Ubiquitin associated and SH3 domain containing B OS=Sus scrofa OX=9823 GN=UBASH3B PE=4 SV=4;tr|A0A4X1VK77|A0A4X1VK77_PIG SH3 domain-containing protein OS=Sus scrofa OX=9823 GN=UBASH3B PE=4 SV=1;tr|A0A287BBF2|A0A287BBF2_PIG Ubiquitin as	5	1	2.4	70.805	631	0.37073	0.43304	1	0	0	0	0	0	0	0	0	0	331150	146000	290760	0	0	0
A0A5G2QGD9	Ubiquinone biosynthesis protein	tr|A0A5G2QGD9|A0A5G2QGD9_PIG Ubiquinone biosynthesis protein OS=Sus scrofa OX=9823 GN=COQ9 PE=1 SV=1;tr|A0A4X1UWV0|A0A4X1UWV0_PIG Ubiquinone biosynthesis protein OS=Sus scrofa OX=9823 GN=COQ9 PE=3 SV=1;tr|I3LHS7|I3LHS7_PIG Ubiquinone biosynthesis protein O	11	1	10.2	22.817	206	0.089117	0.99704	1	0	0	0	0	0	0	0	0	0	26421	44608	83179	0	0	0
A0A480TJZ5	Ubiquinone biosynthesis monooxygenase C	tr|A0A480TJZ5|A0A480TJZ5_PIG Ubiquinone biosynthesis monooxygenase COQ6, mitochondrial isoform X4 OS=Sus scrofa OX=9823 PE=4 SV=1;tr|A0A481CB33|A0A481CB33_PIG Ubiquinone biosynthesis monooxygenase COQ6, mitochondrial isoform X4 OS=Sus scrofa OX=9823 PE=3 S	7	1	3.4	28.792	267	0.66011	0.042929	1	0	0	0	0	0	0	0	0	0	9252.2	26792	16053	0	0	0
A0A5G2REY8	Ubiquinol-cytochrome c reductase core protein 2	tr|A0A5G2REY8|A0A5G2REY8_PIG Ubiquinol-cytochrome c reductase core protein 2 OS=Sus scrofa OX=9823 GN=UQCRC2 PE=1 SV=1;tr|F1RPD2|F1RPD2_PIG Cytochrome b-c1 complex subunit 2, mitochondrial OS=Sus scrofa OX=9823 GN=UQCRC2 PE=1 SV=3;tr|A0A480ZC83|A0A480ZC83_	4	4	13.5	47.346	445	0	26.5	80	122590	98000	110264	69858	94336	69830	93546	97191	106310	168090	265930	269344	195910	198150	412320
F1SKM0	Ubiquinol-cytochrome c reductase core protein 1	tr|F1SKM0|F1SKM0_PIG Ubiquinol-cytochrome c reductase core protein 1 OS=Sus scrofa OX=9823 GN=UQCRC1 PE=1 SV=3;tr|A0A4X1SZL6|A0A4X1SZL6_PIG Uncharacterized protein OS=Sus scrofa OX=9823 GN=LOC100156879 PE=4 SV=1;tr|A0A287A558|A0A287A558_PIG Ubiquinol-cytoc	9	3	8.5	52.698	480	0.10837	0.90537	5	95076	126180	125200	381230	21988	12771	25884	36070	18680	154370	55160	166650	28222	42952	21145
A0A0B8RVE1	Ubiquilin 4	tr|A0A0B8RVE1|A0A0B8RVE1_PIG Ubiquilin 4 OS=Sus scrofa domesticus OX=9825 GN=UBQLN4 PE=4 SV=1;tr|F1RLP9|F1RLP9_PIG Ubiquilin 4 OS=Sus scrofa OX=9823 GN=UBQLN4 PE=1 SV=3;tr|A0A4X1VYL3|A0A4X1VYL3_PIG Uncharacterized protein OS=Sus scrofa OX=9823 GN=UBQLN4 PE	4	4	12.8	45.939	423	0.61969	0.14689	1	0	0	0	40036	37626	82835	0	0	0	0	0	0	0	0	0
A0A287A8H1	Ubiquilin 1	tr|A0A287A8H1|A0A287A8H1_PIG Ubiquilin 1 OS=Sus scrofa OX=9823 GN=UBQLN1 PE=1 SV=2;tr|A0A4X1UTM5|A0A4X1UTM5_PIG Uncharacterized protein OS=Sus scrofa OX=9823 GN=UBQLN1 PE=4 SV=1;tr|A0A287B231|A0A287B231_PIG Ubiquilin 1 OS=Sus scrofa OX=9823 GN=UBQLN1 PE=1	8	4	8.8	55.417	524	0.045221	1.258	10	141860	70086	11867	76037	70256	138280	55015	55728	75606	57359	44713	73317	0	0	0
F1SR20	Ubinuclein 2	tr|F1SR20|F1SR20_PIG Ubinuclein 2 OS=Sus scrofa OX=9823 GN=UBN2 PE=3 SV=3;tr|A0A4X1V893|A0A4X1V893_PIG Uncharacterized protein OS=Sus scrofa OX=9823 GN=UBN2 PE=3 SV=1;tr|A0A4X1V883|A0A4X1V883_PIG UBN_AB domain-containing protein OS=Sus scrofa OX=9823 GN=UB	6	1	1.2	138.61	1285	0.5929	0.19414	1	0	0	0	0	0	0	0	0	0	0	0	0	242720	93578	69133
A0A5G2RGI4	UBC core domain-containing protein	tr|A0A5G2RGI4|A0A5G2RGI4_PIG UBC core domain-containing protein OS=Sus scrofa OX=9823 GN=UBE2N PE=1 SV=1;tr|A0A5G2QZC6|A0A5G2QZC6_PIG UBC core domain-containing protein OS=Sus scrofa OX=9823 GN=UBE2N PE=1 SV=1	5	3	30.6	16.512	144	0.0031447	2.6835	28	166380	779657	77921	128840	140850	165460	176803	211260	269341	120120	273145	342540	158630	98269	81524
A0A4X1W1Y4	UBA domain-containing protein	tr|A0A4X1W1Y4|A0A4X1W1Y4_PIG UBA domain-containing protein OS=Sus scrofa OX=9823 PE=4 SV=1	1	1	2.1	83.139	772	0.21098	0.63435	0	97930	580800	35030	0	0	0	0	0	0	0	0	0	0	0	0
F2Z5P9	U6 snRNA-associated Sm-like protein LSm8	tr|F2Z5P9|F2Z5P9_PIG U6 snRNA-associated Sm-like protein LSm8 OS=Sus scrofa OX=9823 GN=LSM8 PE=1 SV=1;tr|A0A4X1W3A0|A0A4X1W3A0_PIG U6 snRNA-associated Sm-like protein LSm8 OS=Sus scrofa OX=9823 GN=LSM8 PE=3 SV=1	2	1	10.4	10.403	96	0.41422	0.38961	3	204854	310280	210047	25286	60059	41780	0	0	0	0	0	0	0	0	0
A5A8V8	U6 snRNA-associated Sm-like protein LSm2	tr|A5A8V8|A5A8V8_PIG U6 snRNA-associated Sm-like protein LSm2 OS=Sus scrofa OX=9823 GN=LSM2 PE=1 SV=1;tr|A0A4X1V9D9|A0A4X1V9D9_PIG U6 snRNA-associated Sm-like protein LSm2 OS=Sus scrofa OX=9823 GN=LSM2 PE=3 SV=1	2	1	13.7	10.834	95	0.65757	0.055302	1	0	0	0	0	0	0	0	0	0	96044	177050	301130	0	0	0
A0A480YB73	U5 small nuclear ribonucleoprotein 200 kDa helicase-like	tr|A0A480YB73|A0A480YB73_PIG U5 small nuclear ribonucleoprotein 200 kDa helicase-like OS=Sus scrofa OX=9823 PE=4 SV=1;tr|A0A287B5W0|A0A287B5W0_PIG Uncharacterized protein OS=Sus scrofa OX=9823 GN=SNRNP200 PE=1 SV=1;tr|K9J4V0|K9J4V0_PIG Protogenin isoform X	4	1	1.7	73.744	646	0.41466	0.38931	1	0	0	0	0	0	0	0	0	0	60214	54881	110180	0	0	0
A0A480K4M9	U4/U6.U5 tri-snRNP-associated protein 1 isoform X2	tr|A0A480K4M9|A0A480K4M9_PIG U4/U6.U5 tri-snRNP-associated protein 1 isoform X2 OS=Sus scrofa OX=9823 PE=3 SV=1;tr|A0A5G2QY31|A0A5G2QY31_PIG Spliceosome associated factor 1, recruiter of U4/U6.U5 tri-snRNP OS=Sus scrofa OX=9823 GN=SART1 PE=1 SV=1;tr|A0A4X1	7	2	4.1	88.899	780	0.079017	1.0219	1	39720	120173	17301	0	0	0	0	0	0	59827	39838	77112	0	0	0
F1S2K2	U3 small nucleolar RNA-associated protein 15 homolog	tr|F1S2K2|F1S2K2_PIG U3 small nucleolar RNA-associated protein 15 homolog OS=Sus scrofa OX=9823 GN=UTP15 PE=4 SV=3;tr|A0A4X1SME3|A0A4X1SME3_PIG U3 small nucleolar RNA-associated protein 15 homolog OS=Sus scrofa OX=9823 GN=UTP15 PE=4 SV=1;tr|A0A481DBT9|A0A4	4	1	4.8	58.427	518	0.19617	0.64921	0	0	0	0	0	0	0	0	0	0	26097	44191	82900	0	0	0
A0A480ZXX5	U3 small nucleolar ribonucleoprotein IMP4 isoform X2	tr|A0A480ZXX5|A0A480ZXX5_PIG U3 small nucleolar ribonucleoprotein IMP4 isoform X2 OS=Sus scrofa OX=9823 PE=4 SV=1;tr|A0A480ZRE7|A0A480ZRE7_PIG U3 small nucleolar ribonucleoprotein IMP4 isoform X1 OS=Sus scrofa OX=9823 PE=4 SV=1	2	1	9.3	23.346	215	0.52265	0.26593	1	8905.8	180476	84539	0	0	0	0	0	0	0	0	0	0	0	0
A0A4X1TZD3	U2 snRNP auxiliary factor large subunit	tr|A0A4X1TZD3|A0A4X1TZD3_PIG U2 snRNP auxiliary factor large subunit OS=Sus scrofa OX=9823 GN=U2AF2 PE=3 SV=1;tr|A0A287BLH8|A0A287BLH8_PIG U2 snRNP auxiliary factor large subunit OS=Sus scrofa OX=9823 GN=U2AF2 PE=3 SV=1;tr|A0A4X1U165|A0A4X1U165_PIG U2 snRN	7	1	5.9	33.901	307	0.5128	0.27278	1	0	0	0	0	0	0	55180	158830	16629	0	0	0	0	0	0
A0A480MFN3	U2 small nuclear ribonucleoprotein auxiliary factor 35 kDa subunit-related protein 2 isoform X1	tr|A0A480MFN3|A0A480MFN3_PIG U2 small nuclear ribonucleoprotein auxiliary factor 35 kDa subunit-related protein 2 isoform X1 OS=Sus scrofa OX=9823 PE=4 SV=1;tr|I3LF64|I3LF64_PIG Uncharacterized protein OS=Sus scrofa OX=9823 GN=ZRSR2 PE=4 SV=4;tr|A0A4X1UTE9	4	1	4.5	41.689	352	0.61255	0.16251	1	0	0	0	0	0	0	12899	75786	79271	0	0	0	0	0	0
A0A4X1T4T3	U1 small nuclear ribonucleoprotein C	tr|A0A4X1T4T3|A0A4X1T4T3_PIG U1 small nuclear ribonucleoprotein C OS=Sus scrofa OX=9823 GN=SNRPC PE=3 SV=1;tr|A0A287BG27|A0A287BG27_PIG U1 small nuclear ribonucleoprotein C OS=Sus scrofa OX=9823 GN=SNRPC PE=1 SV=2;tr|F1RZ16|F1RZ16_PIG U1 small nuclear ribo	4	1	12.6	17.394	159	0.6304	0.13122	2	0	0	0	59301	72957	35416	0	0	0	143900	132320	204880	0	0	0
Q06AA4	U1 small nuclear ribonucleoprotein A	sp|Q06AA4|SNRPA_PIG U1 small nuclear ribonucleoprotein A OS=Sus scrofa OX=9823 GN=SNRPA PE=1 SV=1	1	2	10.6	31.279	282	0.0023866	9.0767	5	0	0	0	83602	46848	37220	38239	58414	36945	0	0	0	0	0	0
I3LNE5	U1 small nuclear ribonucleoprotein 70 kDa	tr|I3LNE5|I3LNE5_PIG U1 small nuclear ribonucleoprotein 70 kDa OS=Sus scrofa OX=9823 GN=SNRNP70 PE=1 SV=3;tr|A0A4X1VZ49|A0A4X1VZ49_PIG U1 small nuclear ribonucleoprotein 70 kDa OS=Sus scrofa OX=9823 PE=4 SV=1;tr|A0A287AJ85|A0A287AJ85_PIG U1 small nuclear r	5	1	7.9	23.806	202	0.38475	0.41924	1	0	0	0	350990	18393	12652	0	0	0	0	0	0	0	0	0
A0A287BRV8	Tyrosyl-DNA phosphodiesterase 2	tr|A0A287BRV8|A0A287BRV8_PIG Tyrosyl-DNA phosphodiesterase 2 OS=Sus scrofa OX=9823 GN=TDP2 PE=4 SV=2	1	1	4	41.353	373	0.4873	0.29933	1	0	0	0	0	0	0	0	0	0	176460	91714	92749	0	0	0
A0A4X1U0P9	Tyrosine-protein phosphatase non-receptor type 13	tr|A0A4X1U0P9|A0A4X1U0P9_PIG Tyrosine-protein phosphatase non-receptor type 13 OS=Sus scrofa OX=9823 GN=PTPN13 PE=3 SV=1;tr|A0A5G2R969|A0A5G2R969_PIG Tyrosine-protein phosphatase non-receptor type 13 OS=Sus scrofa OX=9823 GN=PTPN13 PE=3 SV=1;tr|A0A4X1U5Y4|	9	2	1.1	252.4	2280	0.37247	0.42936	2	0	0	0	0	0	0	1665300	926540	464210	0	0	0	0	0	0
A0A480MAU7	Tyrosine-protein phosphatase non-receptor type 12 isoform 1	tr|A0A480MAU7|A0A480MAU7_PIG Tyrosine-protein phosphatase non-receptor type 12 isoform 1 OS=Sus scrofa OX=9823 PE=4 SV=1;tr|A0A480VLY7|A0A480VLY7_PIG Tyrosine-protein phosphatase non-receptor type 12 OS=Sus scrofa OX=9823 PE=3 SV=1;tr|F1SB86|F1SB86_PIG Tyr	15	2	7.1	45.456	393	0.51477	0.27036	2	0	0	0	0	0	0	192420	1140300	339430	153360	80749	70133	0	0	0
F1S2Y4	Tyrosine-protein phosphatase non-receptor type	tr|F1S2Y4|F1S2Y4_PIG Tyrosine-protein phosphatase non-receptor type OS=Sus scrofa OX=9823 GN=PTPN14 PE=3 SV=4;tr|A0A4X1TK65|A0A4X1TK65_PIG Tyrosine-protein phosphatase non-receptor type OS=Sus scrofa OX=9823 PE=3 SV=1;tr|A0A480ICD0|A0A480ICD0_PIG Tyrosine-	3	2	3.2	134.27	1186	0.16079	0.76919	2	0	0	0	650250	50848	7596.9	0	0	0	0	0	0	0	0	0
A0A4X1UJM6	Tyrosine-protein phosphatase domain-containing protein	tr|A0A4X1UJM6|A0A4X1UJM6_PIG Tyrosine-protein phosphatase domain-containing protein OS=Sus scrofa OX=9823 GN=STYXL1 PE=4 SV=1	1	1	10	36.79	330	0.62317	0.1413	1	0	0	0	48868	70256	96515	0	0	0	432920	203940	223840	0	0	0
A0A4X1TCX9	Tyrosine-protein kinase receptor	tr|A0A4X1TCX9|A0A4X1TCX9_PIG Tyrosine-protein kinase receptor OS=Sus scrofa OX=9823 PE=3 SV=1;tr|A0A287ASK6|A0A287ASK6_PIG Tyrosine-protein kinase receptor OS=Sus scrofa OX=9823 GN=ROS1 PE=3 SV=2	2	3	1.8	262.39	2341	0.27701	0.59637	3	97172	34409	15489	0	0	0	504620	31943	10741	334560	148470	298340	0	0	0
Q9TTJ0	Tyrosine-protein kinase	tr|Q9TTJ0|Q9TTJ0_PIG Tyrosine-protein kinase OS=Sus scrofa OX=9823 GN=JAK2 PE=2 SV=1;tr|A0A4X1W738|A0A4X1W738_PIG Tyrosine-protein kinase OS=Sus scrofa OX=9823 GN=JAK2 PE=3 SV=1;tr|A0A5G2QGG0|A0A5G2QGG0_PIG Tyrosine-protein kinase OS=Sus scrofa OX=9823 GN=	8	2	2.9	99.031	861	0.3692	0.43565	2	141510	60576	11206	0	0	0	64833	43412	22556	174330	90975	87400	355280	125020	129620
A0A480W6Y7	Tyrosine--tRNA ligase	tr|A0A480W6Y7|A0A480W6Y7_PIG Tyrosine--tRNA ligase OS=Sus scrofa OX=9823 PE=3 SV=1;tr|I3L804|I3L804_PIG Tyrosine--tRNA ligase OS=Sus scrofa OX=9823 GN=YARS1 PE=1 SV=2;tr|A0A4X1VTE1|A0A4X1VTE1_PIG Tyrosine--tRNA ligase OS=Sus scrofa OX=9823 GN=YARS1 PE=3 SV	3	2	7.2	40.891	363	0.1163	0.87141	5	89389	176010	550940	368400	20102	14244	0	0	0	0	0	0	0	0	0
A0A287AXR5	Tyrosine 3-monooxygenase/tryptophan 5-monooxygenase activation protein zeta	tr|A0A287AXR5|A0A287AXR5_PIG Tyrosine 3-monooxygenase/tryptophan 5-monooxygenase activation protein zeta OS=Sus scrofa OX=9823 GN=YWHAZ PE=1 SV=1;tr|A0A4X1TQB0|A0A4X1TQB0_PIG 14_3_3 domain-containing protein OS=Sus scrofa OX=9823 GN=YWHAZ PE=3 SV=1;tr|G9F6	7	8	23.5	26.683	234	0	55.203	175	1421300	1609200	1368300	1400100	1017400	1689800	1241700	927800	1448390	790920	693530	405800	1515100	1409400	1285510
F2Z4Y1	Tyrosine 3-monooxygenase/tryptophan 5-monooxygenase activation protein eta	tr|F2Z4Y1|F2Z4Y1_PIG Tyrosine 3-monooxygenase/tryptophan 5-monooxygenase activation protein eta OS=Sus scrofa OX=9823 GN=YWHAH PE=1 SV=1;tr|A0A4X1V4V6|A0A4X1V4V6_PIG 14_3_3 domain-containing protein OS=Sus scrofa OX=9823 GN=YWHAH PE=3 SV=1	2	4	15	28.211	246	0.009816	1.6927	36	554910	367350	656390	186780	162240	346810	110680	232970	169770	315590	258080	235730	1257100	612710	876540
A0A5G2QTR9	Tyrosine 3-monooxygenase/tryptophan 5-monooxygenase activation protein beta	tr|A0A5G2QTR9|A0A5G2QTR9_PIG Tyrosine 3-monooxygenase/tryptophan 5-monooxygenase activation protein beta OS=Sus scrofa OX=9823 GN=YWHAB PE=1 SV=1	1	5	20.7	27.568	241	0.0053691	1.9433	11	147900	21028	11233	335910	384580	559320	197620	206100	403200	0	0	0	370500	291720	229010
A0A4X1VVH1	TYR_PHOSPHATASE_2 domain-containing protein	tr|A0A4X1VVH1|A0A4X1VVH1_PIG TYR_PHOSPHATASE_2 domain-containing protein OS=Sus scrofa OX=9823 GN=DUSP23 PE=4 SV=1;tr|A0A286ZQZ8|A0A286ZQZ8_PIG Dual specificity phosphatase 23 OS=Sus scrofa OX=9823 GN=DUSP23 PE=1 SV=1	2	1	14.7	16.794	150	0.33571	0.48056	1	0	0	0	13601	7411.1	28102	0	0	0	886060	54600	108960	0	0	0
C0LZ66	Type II collagen alpha 1 (Fragment)	tr|C0LZ66|C0LZ66_PIG Type II collagen alpha 1 (Fragment) OS=Sus scrofa OX=9823 PE=4 SV=1	1	1	29.6	2.3574	27	0.65487	0.068965	2	0	0	0	363020	240485	388090	34721	44193	32843	0	0	0	0	0	0
A0A480MI75	Type 2 DNA topoisomerase 6 subunit B-like isoform a	tr|A0A480MI75|A0A480MI75_PIG Type 2 DNA topoisomerase 6 subunit B-like isoform a OS=Sus scrofa OX=9823 PE=4 SV=1;tr|I3L9W2|I3L9W2_PIG Chromosome 2 C11orf80 homolog OS=Sus scrofa OX=9823 GN=C2H11orf80 PE=4 SV=3;tr|A0A4X1TEN2|A0A4X1TEN2_PIG Uncharacterized p	3	1	2.2	59.173	539	0.55525	0.22607	1	0	0	0	0	0	0	77590	90778	80635	0	0	0	0	0	0
I3LAZ6	Two pore calcium channel protein 2-like isoform X1	tr|I3LAZ6|I3LAZ6_PIG Two pore calcium channel protein 2-like isoform X1 OS=Sus scrofa OX=9823 GN=LOC100620627 PE=4 SV=2;tr|A0A4X1VUD3|A0A4X1VUD3_PIG Uncharacterized protein OS=Sus scrofa OX=9823 GN=LOC100620627 PE=4 SV=1;tr|A0A287A312|A0A287A312_PIG Unchar	3	1	1.6	88.835	773	0.55558	0.22554	1	0	0	0	0	0	0	0	0	0	27928	50506	96365	0	0	0
A0A287A6X7	Twinkle mtDNA helicase	tr|A0A287A6X7|A0A287A6X7_PIG Twinkle mtDNA helicase OS=Sus scrofa OX=9823 GN=TWNK PE=4 SV=1;tr|I3LNP8|I3LNP8_PIG Twinkle mtDNA helicase OS=Sus scrofa OX=9823 GN=TWNK PE=4 SV=2;tr|A0A4X1U2S5|A0A4X1U2S5_PIG SF4 helicase domain-containing protein OS=Sus scrof	3	1	2	66.29	590	0.65511	0.072059	1	0	0	0	0	0	0	73841	184780	57671	0	0	0	0	0	0
G9JM01	Tumor susceptibility 101 protein	tr|G9JM01|G9JM01_PIG Tumor susceptibility 101 protein OS=Sus scrofa OX=9823 PE=2 SV=1;tr|A0A4X1T8I9|A0A4X1T8I9_PIG Uncharacterized protein OS=Sus scrofa OX=9823 PE=3 SV=1;tr|A0A480IRX8|A0A480IRX8_PIG Tumor susceptibility gene 101 protein OS=Sus scrofa OX=9	6	2	6.6	44.054	391	0.16898	0.74436	2	0	0	0	0	0	0	218050	146390	785520	0	0	0	0	0	0
F1SP79	Tumor suppressor candidate 1	tr|F1SP79|F1SP79_PIG Tumor suppressor candidate 1 OS=Sus scrofa OX=9823 GN=TUSC1 PE=4 SV=2;tr|A0A4X1W6U2|A0A4X1W6U2_PIG Uncharacterized protein OS=Sus scrofa OX=9823 PE=4 SV=1	2	1	5.7	23.182	211	0.55353	0.22918	2	0	0	0	0	0	0	196030	210374	143974	0	0	0	94743	71490	103290
A0A5G2R7P8	Tumor necrosis factor receptor superfamily member 6	tr|A0A5G2R7P8|A0A5G2R7P8_PIG Tumor necrosis factor receptor superfamily member 6 OS=Sus scrofa OX=9823 GN=FAS PE=4 SV=1;tr|A0A5G2R2H2|A0A5G2R2H2_PIG Apo-1 antigen OS=Sus scrofa OX=9823 GN=FAS PE=4 SV=1;tr|A0A5G2R5K7|A0A5G2R5K7_PIG Apo-1 antigen OS=Sus scro	8	1	5.6	21.736	196	0.53676	0.24692	1	0	0	0	33287	32035	48903	0	0	0	0	0	0	0	0	0
A0A480Q061	Tuftelin-interacting protein 11	tr|A0A480Q061|A0A480Q061_PIG Tuftelin-interacting protein 11 OS=Sus scrofa OX=9823 PE=4 SV=1;sp|Q06AK6|TFP11_PIG Tuftelin-interacting protein 11 OS=Sus scrofa OX=9823 GN=TFIP11 PE=2 SV=1;tr|A0A480XBS3|A0A480XBS3_PIG Tuftelin-interacting protein 11 OS=Sus s	3	1	3.2	79.065	683	0.61356	0.16193	1	99052	123950	400944	0	0	0	0	0	0	0	0	0	0	0	0
A0A480KAH2	Tudor domain-containing protein 3 isoform X3	tr|A0A480KAH2|A0A480KAH2_PIG Tudor domain-containing protein 3 isoform X3 OS=Sus scrofa OX=9823 PE=4 SV=1;tr|A0A5G2QSB2|A0A5G2QSB2_PIG Tudor domain-containing protein 3 OS=Sus scrofa OX=9823 GN=TDRD3 PE=4 SV=1;tr|I3LC04|I3LC04_PIG Tudor domain-containing p	8	1	2.1	66.146	584	0.41161	0.39174	1	0	0	0	230780	7484.2	11501	0	0	0	0	0	0	0	0	0
A0A4X1TH37	Tudor domain-containing protein	tr|A0A4X1TH37|A0A4X1TH37_PIG Tudor domain-containing protein OS=Sus scrofa OX=9823 GN=SMNDC1 PE=4 SV=1;tr|A0A286ZR12|A0A286ZR12_PIG Survival motor neuron domain containing 1 OS=Sus scrofa OX=9823 GN=SMNDC1 PE=1 SV=1	2	1	4	22.428	199	0.58583	0.19835	1	0	0	0	0	0	0	122300	113690	69427	0	0	0	0	0	0
I3L8U6	Tudor domain containing 6	tr|I3L8U6|I3L8U6_PIG Tudor domain containing 6 OS=Sus scrofa OX=9823 GN=TDRD6 PE=1 SV=2	1	1	0.6	237.03	2113	0.37633	0.42734	1	0	0	0	0	0	0	96688	131170	514400	0	0	0	0	0	0
F1RNY5	Tudor domain containing 12	tr|F1RNY5|F1RNY5_PIG Tudor domain containing 12 OS=Sus scrofa OX=9823 GN=TDRD12 PE=4 SV=4;tr|A0A4X1TSU3|A0A4X1TSU3_PIG Uncharacterized protein OS=Sus scrofa OX=9823 GN=TDRD12 PE=4 SV=1	2	1	1.8	147.68	1304	0.65641	0.060298	1	45337	19592	21896	0	0	0	0	0	0	0	0	0	0	0	0
F1RZW1	Tubulointerstitial nephritis antigen	tr|F1RZW1|F1RZW1_PIG Tubulointerstitial nephritis antigen OS=Sus scrofa OX=9823 GN=TINAG PE=3 SV=3;tr|A0A4X1UMP2|A0A4X1UMP2_PIG SMB domain-containing protein OS=Sus scrofa OX=9823 GN=TINAG PE=3 SV=1;tr|I3L9E7|I3L9E7_PIG Tubulointerstitial nephritis antigen	6	1	5	50.042	438	0.34881	0.4564	1	302440	167690	1887075	0	0	0	0	0	0	0	0	0	0	0	0
F1S2G3	Tubulin-specific chaperone A	tr|F1S2G3|F1S2G3_PIG Tubulin-specific chaperone A OS=Sus scrofa OX=9823 GN=TBCA PE=1 SV=2;tr|A0A4X1SXX4|A0A4X1SXX4_PIG Tubulin-specific chaperone A OS=Sus scrofa OX=9823 GN=TBCA PE=3 SV=1	2	2	15.7	12.701	108	0.017773	1.5889	35	0	0	0	331500	419380	234900	402150	400320	694840	182040	201710	361320	507330	335350	446510
A0A287AE62	Tubulin-folding cofactor E	tr|A0A287AE62|A0A287AE62_PIG Tubulin-folding cofactor E OS=Sus scrofa OX=9823 GN=TBCE PE=1 SV=1;tr|A0A5G2R673|A0A5G2R673_PIG Tubulin-folding cofactor E OS=Sus scrofa OX=9823 GN=TBCE PE=1 SV=1;tr|A0A4X1UEC0|A0A4X1UEC0_PIG Tubulin-folding cofactor E OS=Sus s	12	1	3.1	51.452	459	0.59537	0.18782	1	0	0	0	0	0	0	0	0	0	0	0	0	461440	146440	169190
A0A480TZA8	Tubulin--tyrosine ligase-like protein 12	tr|A0A480TZA8|A0A480TZA8_PIG Tubulin--tyrosine ligase-like protein 12 OS=Sus scrofa OX=9823 PE=4 SV=1;tr|A0A4X1VYH2|A0A4X1VYH2_PIG Uncharacterized protein OS=Sus scrofa OX=9823 PE=4 SV=1;tr|F1SJR7|F1SJR7_PIG Tubulin tyrosine ligase like 12 OS=Sus scrofa OX	10	1	8.1	38.563	346	0.64836	0.091318	1	0	0	0	0	0	0	46852	34844	14977	0	0	0	0	0	0
A0A5G2QCQ5	Tubulin folding cofactor A	tr|A0A5G2QCQ5|A0A5G2QCQ5_PIG Tubulin folding cofactor A OS=Sus scrofa OX=9823 GN=TBCA PE=4 SV=1;tr|A0A4X1SZ08|A0A4X1SZ08_PIG Uncharacterized protein OS=Sus scrofa OX=9823 GN=TBCA PE=4 SV=1	2	1	30.8	2.9395	26	0.55056	0.23257	1	173130	320475	22745	0	0	0	0	0	0	0	0	0	0	0	0
F1SUH9	Tubulin epsilon and delta complex 2	tr|F1SUH9|F1SUH9_PIG Tubulin epsilon and delta complex 2 OS=Sus scrofa OX=9823 GN=TEDC2 PE=4 SV=4;tr|A0A480JTN0|A0A480JTN0_PIG Tubulin epsilon and delta complex protein 2 OS=Sus scrofa OX=9823 PE=4 SV=1;tr|A0A4X1VU62|A0A4X1VU62_PIG Uncharacterized protein	5	1	2.9	44.851	411	0.51162	0.27366	1	0	0	0	40342	44188	87151	0	0	0	0	0	0	0	0	0
Q767L7	Tubulin beta chain	sp|Q767L7|TBB5_PIG Tubulin beta chain OS=Sus scrofa OX=9823 GN=TUBB PE=2 SV=1;tr|A0A480TK33|A0A480TK33_PIG Tubulin beta chain OS=Sus scrofa OX=9823 PE=3 SV=1;tr|A0A4X1VI43|A0A4X1VI43_PIG Tubulin beta chain OS=Sus scrofa OX=9823 GN=TUBB PE=3 SV=1;tr|F2Z5B2|	6	34	81.3	49.67	444	0	323.31	1628	2797800	3173900	2125300	7072400	5828800	4032321	7403600	6118900	5869854	2146000	1852900	1944900	2449000	3423300	2222370
Q2XVP4	Tubulin alpha-1B chain	sp|Q2XVP4|TBA1B_PIG Tubulin alpha-1B chain OS=Sus scrofa OX=9823 GN=TUBA1B PE=1 SV=1;tr|A0A4X1WCU9|A0A4X1WCU9_PIG Tubulin alpha chain OS=Sus scrofa OX=9823 GN=TUBA1A PE=3 SV=1;tr|A0A4X1WCL9|A0A4X1WCL9_PIG Tubulin alpha chain OS=Sus scrofa OX=9823 GN=TUBA1A	20	23	65.6	50.151	451	0	323.31	834	3870000	3372900	3121760	6052900	5541100	5162300	8754000	6161000	6509620	2520100	2376900	1930273	2217400	4559700	2637590
B6A7R0	Tubulin alpha chain	tr|B6A7R0|B6A7R0_PIG Tubulin alpha chain OS=Sus scrofa OX=9823 PE=2 SV=1;tr|A0A480NAY0|A0A480NAY0_PIG Tubulin alpha chain OS=Sus scrofa OX=9823 PE=3 SV=1;tr|A0A480TEX9|A0A480TEX9_PIG Tubulin alpha chain OS=Sus scrofa OX=9823 PE=3 SV=1;tr|A0A4X1U9Z0|A0A4X1U	8	23	65.6	50.165	451	0.0024631	9.9487	66	188450	188560	143047	502730	302230	380100	560050	417400	844500	208480	185520	130202	219030	247860	299820
A0A5G2QAH1	TTK protein kinase	tr|A0A5G2QAH1|A0A5G2QAH1_PIG TTK protein kinase OS=Sus scrofa OX=9823 GN=TTK PE=4 SV=1;tr|A0A4X1V4B2|A0A4X1V4B2_PIG Protein kinase domain-containing protein OS=Sus scrofa OX=9823 GN=TTK PE=4 SV=1;tr|A0A286ZQJ7|A0A286ZQJ7_PIG TTK protein kinase OS=Sus scrof	6	1	1.6	91.068	806	0.51442	0.2704	1	76693	35674	62180	0	0	0	0	0	0	0	0	0	0	0	0
A0A4X1VVV4	TSNAXIP1_N domain-containing protein	tr|A0A4X1VVV4|A0A4X1VVV4_PIG TSNAXIP1_N domain-containing protein OS=Sus scrofa OX=9823 PE=4 SV=1	1	2	4.6	57.322	498	0.53312	0.25583	2	940200	704790	841065	0	0	0	122900	979010	278770	0	0	0	0	0	0
I3LF59	TSC22 domain family member 2	tr|I3LF59|I3LF59_PIG TSC22 domain family member 2 OS=Sus scrofa OX=9823 GN=TSC22D2 PE=3 SV=2;tr|A0A4X1SX54|A0A4X1SX54_PIG Uncharacterized protein OS=Sus scrofa OX=9823 GN=TSC22D2 PE=3 SV=1;tr|F1SJN6|F1SJN6_PIG TSC22 domain family member 2 OS=Sus scrofa OX=	4	1	1.6	76.365	763	0.17853	0.72776	5	0	0	0	20340	30674	26502	23533	29030	36617	0	0	0	0	0	0
A0A480N0A2	Tryptophanyl-tRNA synthetase	tr|A0A480N0A2|A0A480N0A2_PIG Tryptophanyl-tRNA synthetase OS=Sus scrofa OX=9823 PE=3 SV=1;tr|A0A4X1TKM1|A0A4X1TKM1_PIG T1-TrpRS OS=Sus scrofa OX=9823 GN=WARS1 PE=3 SV=1;tr|K9IVV5|K9IVV5_PIG T1-TrpRS OS=Sus scrofa OX=9823 GN=WARS1 PE=1 SV=1;tr|A0A4X1TNA0|A0	7	4	14.7	40.62	361	0.0026247	12.236	17	198010	228680	210596	61753	93047	104920	127820	71397	260430	7943000	5664200	5988100	0	0	0
F1SH22	Tryptophan 5-monooxygenase	tr|F1SH22|F1SH22_PIG Tryptophan 5-monooxygenase OS=Sus scrofa OX=9823 GN=TPH2 PE=3 SV=3;tr|A0A4X1W1P4|A0A4X1W1P4_PIG Tryptophan 5-monooxygenase OS=Sus scrofa OX=9823 PE=3 SV=1	2	3	3.3	55.992	491	0.012121	1.6413	3	60727	16989	4547.6	42715	10737	22933	0	0	0	0	0	0	77787	306060	254670
A0A5G2R059	Tryptophan 2,3-dioxygenase	tr|A0A5G2R059|A0A5G2R059_PIG Tryptophan 2,3-dioxygenase OS=Sus scrofa OX=9823 GN=TDO2 PE=4 SV=1	1	1	4	44.227	376	0.63628	0.11244	1	0	0	0	0	0	0	45489	33400	14058	0	0	0	0	0	0
P00761	Trypsin	sp|P00761|TRYP_PIG Trypsin OS=Sus scrofa OX=9823 PE=1 SV=1;;tr|A0A4X1V4D2|A0A4X1V4D2_PIG Peptidase S1 domain-containing protein OS=Sus scrofa OX=9823 GN=LOC100302368 PE=4 SV=1;tr|C5IWV5|C5IWV5_PIG Trypsinogen OS=Sus scrofa OX=9823 PE=2 SV=1;tr|A0A4X1V2S2|A	6	8	45.5	24.409	231	0	323.31	758	25989600	28418000	37596000	48937300	37405800	66250000	26907600	38083000	42239000	32821000	59474900	45820000	56876600	74787000	97374000
A0A2Z2YT41	Truncated von Willebrand factor (Fragment)	tr|A0A2Z2YT41|A0A2Z2YT41_PIG Truncated von Willebrand factor (Fragment) OS=Sus scrofa OX=9823 GN=VWF PE=4 SV=1	1	1	100	2.1136	21	0.63611	0.1196	1	42449	9266	19365	0	0	0	0	0	0	0	0	0	0	0	0
A0A4X1U8T2	Troponin T, fast skeletal muscle	tr|A0A4X1U8T2|A0A4X1U8T2_PIG Troponin T, fast skeletal muscle OS=Sus scrofa OX=9823 GN=TNNT3 PE=3 SV=1	1	1	6.7	44.017	390	0.6403	0.10554	1	96802	538160	124527	0	0	0	0	0	0	0	0	0	0	0	0
A0A287AVB7	Troponin I2, fast skeletal type	tr|A0A287AVB7|A0A287AVB7_PIG Troponin I2, fast skeletal type OS=Sus scrofa OX=9823 GN=TNNI2 PE=4 SV=1	1	1	3.6	27.635	249	0.65464	0.070543	2	0	0	0	0	0	0	0	0	0	169290	313817	361730	0	0	0
A0A287B1R0	Troponin C, skeletal muscle	tr|A0A287B1R0|A0A287B1R0_PIG Troponin C, skeletal muscle OS=Sus scrofa OX=9823 GN=TNNC2 PE=1 SV=1	1	1	4.3	23.668	211	0.47286	0.31583	1	0	0	0	0	0	0	0	0	0	27209	47029	87145	0	0	0
P67937	Tropomyosin alpha-4 chain	sp|P67937|TPM4_PIG Tropomyosin alpha-4 chain OS=Sus scrofa OX=9823 GN=TPM4 PE=2 SV=3;tr|D0G7F7|D0G7F7_PIG Tropomyosin 4 OS=Sus scrofa OX=9823 GN=TPM4 PE=2 SV=1;tr|A0A5G2RJ42|A0A5G2RJ42_PIG Tropomyosin alpha-4 chain OS=Sus scrofa OX=9823 GN=TPM4 PE=1 SV=1;t	16	14	56	28.521	248	0.0032051	20.642	19	5238300	4592900	3028564	0	0	0	70456	137760	84952	0	0	0	0	0	0
A0A287B5N7	Tropomyosin alpha-1 chain	tr|A0A287B5N7|A0A287B5N7_PIG Tropomyosin alpha-1 chain OS=Sus scrofa OX=9823 GN=TPM1 PE=1 SV=2;tr|A0A4X1TV76|A0A4X1TV76_PIG Tropomyosin alpha-1 chain OS=Sus scrofa OX=9823 GN=TPM1 PE=3 SV=1;tr|A0A4X1TY88|A0A4X1TY88_PIG Tropomyosin alpha-1 chain OS=Sus scro	7	14	42.2	40.065	351	0.0022472	7.5639	27	1725600	973640	527320	0	0	0	34909	56097	36945	39047	33701	59692	47535	67909	119364
Q6QA25	Tropomyosin 3	tr|Q6QA25|Q6QA25_PIG Tropomyosin 3 OS=Sus scrofa OX=9823 GN=TPM3 PE=2 SV=1;tr|A0A480SLY1|A0A480SLY1_PIG Tropomyosin alpha-3 chain isoform Tpm3.3cy OS=Sus scrofa OX=9823 PE=3 SV=1;tr|A0A5G2QIK0|A0A5G2QIK0_PIG Tropomyosin alpha-3 chain OS=Sus scrofa OX=9823	17	14	46.8	29.032	248	0	60.79	86	2984600	3912600	4784200	353460	719450	594754	610130	485810	1243300	0	0	0	495560	234270	155120
F1SG00	Tropomyosin 2	tr|F1SG00|F1SG00_PIG Tropomyosin 2 OS=Sus scrofa OX=9823 GN=TPM2 PE=1 SV=2;tr|A0A4X1VY40|A0A4X1VY40_PIG Uncharacterized protein OS=Sus scrofa OX=9823 GN=TPM2 PE=3 SV=1;tr|A0A4X1VWM4|A0A4X1VWM4_PIG Uncharacterized protein OS=Sus scrofa OX=9823 GN=TPM2 PE=3	15	13	41.9	32.8	284	0.075269	1.0429	4	460250	194180	300150	0	0	0	0	0	0	0	0	0	0	0	0
F1SSY3	Tropomodulin 4	tr|F1SSY3|F1SSY3_PIG Tropomodulin 4 OS=Sus scrofa OX=9823 GN=TMOD4 PE=1 SV=3	1	1	3.3	37.838	338	0.44323	0.34901	1	112860	5003.6	48004	0	0	0	0	0	0	0	0	0	0	0	0
A0A286ZJ54	Tropomodulin 2	tr|A0A286ZJ54|A0A286ZJ54_PIG Tropomodulin 2 OS=Sus scrofa OX=9823 GN=TMOD2 PE=1 SV=2;tr|A0A4X1T3M3|A0A4X1T3M3_PIG Uncharacterized protein OS=Sus scrofa OX=9823 GN=TMOD2 PE=4 SV=1;tr|A0A4X1T2X8|A0A4X1T2X8_PIG Uncharacterized protein OS=Sus scrofa OX=9823 GN	10	1	5.4	33.434	296	0.5318	0.25347	1	0	0	0	0	0	0	0	0	0	31405	12819	32695	0	0	0
A0A480L1A9	Trophinin isoform X1	tr|A0A480L1A9|A0A480L1A9_PIG Trophinin isoform X1 OS=Sus scrofa OX=9823 PE=4 SV=1	1	1	1.7	129.72	1258	0.5242	0.26443	1	0	0	0	0	0	0	0	0	0	0	0	0	238900	90966	66207
A0A287AT72	tRNA-splicing endonuclease subunit Sen34	tr|A0A287AT72|A0A287AT72_PIG tRNA-splicing endonuclease subunit Sen34 OS=Sus scrofa OX=9823 GN=TSEN34 PE=3 SV=1;tr|A0A4X1VPX1|A0A4X1VPX1_PIG tRNA-splicing endonuclease subunit Sen34 OS=Sus scrofa OX=9823 GN=TSEN34 PE=3 SV=1;tr|F1RNG9|F1RNG9_PIG tRNA-splici	3	1	7.1	33.802	311	0.59549	0.18751	1	0	0	0	0	0	0	110660	54062	38859	0	0	0	0	0	0
A0A4X1TH90	tRNA selenocysteine 1-associated protein 1	tr|A0A4X1TH90|A0A4X1TH90_PIG tRNA selenocysteine 1-associated protein 1 OS=Sus scrofa OX=9823 GN=TRNAU1AP PE=3 SV=1;tr|A0A287AQ52|A0A287AQ52_PIG tRNA selenocysteine 1-associated protein 1 OS=Sus scrofa OX=9823 GN=TRNAU1AP PE=3 SV=1	2	1	11.8	32.498	287	0.35173	0.45315	1	0	0	0	0	0	0	469210	345970	322530	0	0	0	0	0	0
A0A5G2QRC3	tRNA pseudouridine synthase	tr|A0A5G2QRC3|A0A5G2QRC3_PIG tRNA pseudouridine synthase OS=Sus scrofa OX=9823 GN=PUSL1 PE=3 SV=1	1	1	3.8	34.404	314	0.60464	0.17831	1	0	0	0	71968	47722	98476	0	0	0	0	0	0	0	0	0
A0A4X1T1S0	tRNA (guanine(26)-N(2))-dimethyltransferase	tr|A0A4X1T1S0|A0A4X1T1S0_PIG tRNA (guanine(26)-N(2))-dimethyltransferase OS=Sus scrofa OX=9823 PE=3 SV=1;tr|A0A4X1T009|A0A4X1T009_PIG tRNA (guanine(26)-N(2))-dimethyltransferase OS=Sus scrofa OX=9823 PE=3 SV=1;tr|F1SD98|F1SD98_PIG tRNA (guanine(26)-N(2))-d	3	2	3.3	68.945	635	0.33904	0.47077	3	0	0	0	118740	166954	200230	127990	112230	138380	0	0	0	246940	949270	168580
A0A480LYD1	tRNA (Cytosine(34)-C(5))-methyltransferase isoform 2	tr|A0A480LYD1|A0A480LYD1_PIG tRNA (Cytosine(34)-C(5))-methyltransferase isoform 2 OS=Sus scrofa OX=9823 PE=3 SV=1;tr|A0A481B2L4|A0A481B2L4_PIG NOL1/NOP2/Sun domain family member 2 OS=Sus scrofa OX=9823 PE=3 SV=1;tr|A0A5G2QRK5|A0A5G2QRK5_PIG NOL1/NOP2/Sun d	17	2	5.6	53.41	480	0.004451	2.3847	14	0	0	0	64893	37685	36892	53773	29025	36092	0	0	0	0	0	0
A0A4X1TS85	tRNA (adenine(58)-N(1))-methyltransferase catalytic subunit TRMT61A	tr|A0A4X1TS85|A0A4X1TS85_PIG tRNA (adenine(58)-N(1))-methyltransferase catalytic subunit TRMT61A OS=Sus scrofa OX=9823 GN=TRMT61A PE=3 SV=1;tr|A0A287BGP5|A0A287BGP5_PIG tRNA (adenine(58)-N(1))-methyltransferase catalytic subunit TRMT61A OS=Sus scrofa OX=98	2	1	5.3	31.14	285	0.65961	0.039876	1	0	0	0	0	0	0	50272	287260	19245	0	0	0	0	0	0
A0A4X1TQP4	TRMT1-like protein	tr|A0A4X1TQP4|A0A4X1TQP4_PIG TRMT1-like protein OS=Sus scrofa OX=9823 PE=3 SV=1;tr|A0A5G2QKR8|A0A5G2QKR8_PIG TRMT1-like protein OS=Sus scrofa OX=9823 GN=TRMT1L PE=1 SV=1;tr|A0A4X1TQQ6|A0A4X1TQQ6_PIG TRMT1-like protein OS=Sus scrofa OX=9823 PE=3 SV=1;tr|A0A	5	1	1.8	79.49	710	0.53186	0.25418	1	0	0	0	18283	29639	4422	0	0	0	0	0	0	0	0	0
Q6QAR1	TRK-fused protein (Fragment)	tr|Q6QAR1|Q6QAR1_PIG TRK-fused protein (Fragment) OS=Sus scrofa OX=9823 PE=2 SV=1;tr|A0A5G2QBI5|A0A5G2QBI5_PIG Trafficking from ER to golgi regulator OS=Sus scrofa OX=9823 GN=TFG PE=1 SV=1;tr|A0A5G2QRV2|A0A5G2QRV2_PIG Trafficking from ER to golgi regulator	5	1	9.3	19.568	183	0.12166	0.84932	6	0	0	0	111430	105320	157950	155010	227260	118380	0	0	0	0	0	0
A0A4X1U8S5	Tripeptidyl-peptidase 2	tr|A0A4X1U8S5|A0A4X1U8S5_PIG Tripeptidyl-peptidase 2 OS=Sus scrofa OX=9823 PE=4 SV=1;tr|A0A4X1UAM5|A0A4X1UAM5_PIG Tripeptidyl-peptidase 2 OS=Sus scrofa OX=9823 PE=4 SV=1;tr|A0A4X1U8I5|A0A4X1U8I5_PIG Tripeptidyl-peptidase 2 OS=Sus scrofa OX=9823 PE=4 SV=1;t	25	3	3.2	140.44	1273	0.0075758	1.7724	4	0	0	0	893570	673730	556301	0	0	0	567170	485947	738000	0	0	0
A0A5G2Q9Z7	Tripartite motif-containing protein 26	tr|A0A5G2Q9Z7|A0A5G2Q9Z7_PIG Tripartite motif-containing protein 26 OS=Sus scrofa OX=9823 GN=TRIM26 PE=4 SV=1;tr|F1RZ52|F1RZ52_PIG Tripartite motif-containing protein 26 OS=Sus scrofa OX=9823 GN=TRIM26 PE=4 SV=3;tr|A0A4X1VIU1|A0A4X1VIU1_PIG Tripartite moti	6	1	1.9	59.3	514	0.58616	0.20086	1	0	0	0	0	0	0	0	0	0	21613	50665	97171	0	0	0
A0A5G2QG59	Tripartite motif-containing protein 15	tr|A0A5G2QG59|A0A5G2QG59_PIG Tripartite motif-containing protein 15 OS=Sus scrofa OX=9823 GN=TRIM15 PE=4 SV=1	1	1	2.3	54.394	486	0.18107	0.71419	3	0	0	0	0	0	0	0	0	0	0	0	0	13756000	18345200	17493800
A0A5G2RJE9	Tripartite motif-containing protein 14 isoform X1	tr|A0A5G2RJE9|A0A5G2RJE9_PIG Tripartite motif-containing protein 14 isoform X1 OS=Sus scrofa OX=9823 GN=TRIM14 PE=4 SV=1;tr|A0A4X1TVU2|A0A4X1TVU2_PIG Uncharacterized protein OS=Sus scrofa OX=9823 GN=TRIM14 PE=4 SV=1	2	1	3.6	49.942	445	0.26755	0.61033	0	0	0	0	0	0	0	0	0	0	44431	53077	106000	0	0	0
I7FYV8	Tripartite motif-containing 10 isoform 1	tr|I7FYV8|I7FYV8_PIG Tripartite motif-containing 10 isoform 1 OS=Sus scrofa OX=9823 GN=TRIM10 PE=4 SV=1;sp|O19085|TRI10_PIG Tripartite motif-containing protein 10 OS=Sus scrofa OX=9823 GN=TRIM10 PE=3 SV=2;tr|F1RZ50|F1RZ50_PIG Tripartite motif-containing pr	6	1	3.4	47.295	407	0.61148	0.16552	1	0	0	0	0	0	0	0	0	0	0	0	0	43576	16852	19181
F1SN25	Tripartite motif containing 69	tr|F1SN25|F1SN25_PIG Tripartite motif containing 69 OS=Sus scrofa OX=9823 GN=TRIM69 PE=4 SV=3;tr|A0A4X1VDQ8|A0A4X1VDQ8_PIG Uncharacterized protein OS=Sus scrofa OX=9823 PE=4 SV=1	2	1	2.4	57.598	500	0.54315	0.24168	1	13749	59241	2193.3	0	0	0	0	0	0	0	0	0	0	0	0
A0A287BHH6	Tripartite motif containing 58	tr|A0A287BHH6|A0A287BHH6_PIG Tripartite motif containing 58 OS=Sus scrofa OX=9823 GN=TRIM58 PE=4 SV=1;tr|A0A4X1U148|A0A4X1U148_PIG Uncharacterized protein OS=Sus scrofa OX=9823 PE=4 SV=1;tr|A0A5G2QRS5|A0A5G2QRS5_PIG Tripartite motif containing 58 OS=Sus sc	3	1	3.1	54.918	480	0.42429	0.38053	2	0	0	0	0	0	0	114860	203120	174500	0	0	0	0	0	0
I3L6F4	Tripartite motif containing 55	tr|I3L6F4|I3L6F4_PIG Tripartite motif containing 55 OS=Sus scrofa OX=9823 GN=TRIM55 PE=4 SV=2;tr|F1B1R1|F1B1R1_PIG Muscle-specific RING finger protein 2, transcript variant 2 OS=Sus scrofa OX=9823 GN=muRF2 PE=2 SV=1;tr|A0A4X1UZW4|A0A4X1UZW4_PIG Uncharacter	9	1	3.8	49.641	442	0.65455	0.070242	1	0	0	0	108360	114260	59141	0	0	0	0	0	0	0	0	0
F1RVZ0	Tripartite motif containing 47	tr|F1RVZ0|F1RVZ0_PIG Tripartite motif containing 47 OS=Sus scrofa OX=9823 GN=TRIM47 PE=1 SV=1;tr|A0A4X1V003|A0A4X1V003_PIG Uncharacterized protein OS=Sus scrofa OX=9823 GN=TRIM47 PE=4 SV=1	2	1	1.9	70.416	646	0.48486	0.30266	1	256880	289543	282890	0	0	0	0	0	0	0	0	0	0	0	0
I3L6F2	Tripartite motif containing 45	tr|I3L6F2|I3L6F2_PIG Tripartite motif containing 45 OS=Sus scrofa OX=9823 GN=TRIM45 PE=3 SV=2	1	1	2.6	62.929	572	0.61213	0.16421	1	0	0	0	0	0	0	0	0	0	67314	38690	87392	0	0	0
A0A287AFZ1	Tripartite motif containing 37	tr|A0A287AFZ1|A0A287AFZ1_PIG Tripartite motif containing 37 OS=Sus scrofa OX=9823 GN=TRIM37 PE=4 SV=1;tr|A0A287A0H3|A0A287A0H3_PIG Tripartite motif containing 37 OS=Sus scrofa OX=9823 GN=TRIM37 PE=4 SV=2;tr|A0A286ZML2|A0A286ZML2_PIG Tripartite motif contai	7	1	0.9	105.48	940	0.65957	0.038486	1	0	0	0	0	0	0	0	0	0	69011	17718	44127	0	0	0
F1SMI2	Tripartite motif containing 32	tr|F1SMI2|F1SMI2_PIG Tripartite motif containing 32 OS=Sus scrofa OX=9823 GN=TRIM32 PE=1 SV=2;tr|A0A4X1UVJ6|A0A4X1UVJ6_PIG Uncharacterized protein OS=Sus scrofa OX=9823 GN=TRIM32 PE=3 SV=1	2	1	2.8	71.838	652	0.65074	0.079965	1	0	0	0	0	0	0	203450	344520	47065	0	0	0	0	0	0
A0A287BNE9	Tripartite motif containing 28	tr|A0A287BNE9|A0A287BNE9_PIG Tripartite motif containing 28 OS=Sus scrofa OX=9823 GN=TRIM28 PE=4 SV=2;tr|A0A4X1W3I5|A0A4X1W3I5_PIG Uncharacterized protein OS=Sus scrofa OX=9823 GN=TRIM28 PE=4 SV=1;tr|A0A286ZVA8|A0A286ZVA8_PIG Tripartite motif containing 28	6	12	26.9	88.558	836	0	206.74	165	408270	665910	701820	1023900	1292800	1872900	1203800	1132600	1725600	1115700	1062600	1833600	710210	874270	1481500
Q1W5B8	Triosephosphate isomerase	tr|Q1W5B8|Q1W5B8_PIG Triosephosphate isomerase OS=Sus scrofa OX=9823 GN=TPI1 PE=2 SV=1;tr|D0G7F6|D0G7F6_PIG Triosephosphate isomerase OS=Sus scrofa OX=9823 GN=TPI1 PE=1 SV=1;tr|A0A4X1UWQ7|A0A4X1UWQ7_PIG Triosephosphate isomerase OS=Sus scrofa OX=9823 PE=3	7	10	52	26.651	248	0	238.36	111	401400	524500	294003	1282680	1303600	1413200	263590	690420	458480	125120	96953	145620	1119500	589520	1155100
A0A480V084	Trinucleotide repeat-containing gene 6B protein isoform 1	tr|A0A480V084|A0A480V084_PIG Trinucleotide repeat-containing gene 6B protein isoform 1 OS=Sus scrofa OX=9823 PE=4 SV=1;tr|A0A4X1W155|A0A4X1W155_PIG TNRC6-PABC_bdg domain-containing protein OS=Sus scrofa OX=9823 GN=TNRC6B PE=4 SV=1;tr|A0A286ZSA8|A0A286ZSA8_	15	1	1.1	116.65	1109	0.41739	0.38515	2	102000	40843	37273	0	0	0	0	0	0	39791	48894	45659	0	0	0
A0A480RW06	Trinucleotide repeat-containing gene 18 protein	tr|A0A480RW06|A0A480RW06_PIG Trinucleotide repeat-containing gene 18 protein OS=Sus scrofa OX=9823 PE=4 SV=1	1	2	1.4	176.82	1672	0.46484	0.32278	1	0	0	0	0	0	0	0	0	0	3178.6	43385	80561	0	0	0
A0A287BNE0	Trinucleotide repeat containing adaptor 6A	tr|A0A287BNE0|A0A287BNE0_PIG Trinucleotide repeat containing adaptor 6A OS=Sus scrofa OX=9823 GN=TNRC6A PE=4 SV=1;tr|A0A4X1UY64|A0A4X1UY64_PIG Uncharacterized protein OS=Sus scrofa OX=9823 GN=TNRC6A PE=3 SV=1;tr|A0A287AVJ8|A0A287AVJ8_PIG Trinucleotide repe	16	1	0.8	192.97	1798	0.37602	0.42765	1	0	0	0	9947.3	83359	6794.7	0	0	0	0	0	0	0	0	0
I3L931	Trinucleotide repeat containing 18	tr|I3L931|I3L931_PIG Trinucleotide repeat containing 18 OS=Sus scrofa OX=9823 GN=TNRC18 PE=4 SV=2;tr|A0A286ZUR0|A0A286ZUR0_PIG Trinucleotide repeat containing 18 OS=Sus scrofa OX=9823 GN=TNRC18 PE=4 SV=1;tr|A0A4X1TMI7|A0A4X1TMI7_PIG Uncharacterized protein	10	2	0.9	252.62	2383	0.39012	0.41452	2	0	0	0	62284	297910	48392	0	0	0	0	0	0	107580	52270	24569
I3LTE9	Triggering receptor expressed on myeloid cells like 2	tr|I3LTE9|I3LTE9_PIG Triggering receptor expressed on myeloid cells like 2 OS=Sus scrofa OX=9823 GN=TREML2 PE=4 SV=2;tr|A0A4X1SK24|A0A4X1SK24_PIG Uncharacterized protein OS=Sus scrofa OX=9823 GN=TREML2 PE=4 SV=1	2	1	3.4	35.271	324	0.564	0.21919	1	0	0	0	0	0	0	0	0	0	0	0	0	33765	98595	57261
A0A480PP93	Trifunctional enzyme subunit alpha, mitochondrial	tr|A0A480PP93|A0A480PP93_PIG Trifunctional enzyme subunit alpha, mitochondrial OS=Sus scrofa OX=9823 PE=3 SV=1;tr|A0A480PE19|A0A480PE19_PIG Enoyl-CoA hydratase OS=Sus scrofa OX=9823 PE=3 SV=1;tr|A0A5G2RBW4|A0A5G2RBW4_PIG Enoyl-CoA hydratase OS=Sus scrofa O	8	3	8	55.918	514	0.10395	0.91592	11	79594	66101	208150	71582	92092	69160	74876	81286	43050	63066	73094	84469	0	0	0
Q0VTR2	Trefoil factor 2 (Fragment)	tr|Q0VTR2|Q0VTR2_PIG Trefoil factor 2 (Fragment) OS=Sus scrofa OX=9823 GN=TFF2 PE=2 SV=1	1	1	27.1	5.3902	48	0.36374	0.44296	1	354905	178890	1167800	0	0	0	0	0	0	0	0	0	0	0	0
A0A5G2R479	Treacle ribosome biogenesis factor 1	tr|A0A5G2R479|A0A5G2R479_PIG Treacle ribosome biogenesis factor 1 OS=Sus scrofa OX=9823 GN=TCOF1 PE=1 SV=1;tr|A0A4X1TBD4|A0A4X1TBD4_PIG LisH domain-containing protein OS=Sus scrofa OX=9823 GN=TCOF1 PE=4 SV=1;tr|A0A4X1T7P8|A0A4X1T7P8_PIG LisH domain-contain	10	2	3.3	130.88	1295	0.026018	1.4729	5	4386900	1078000	5675800	54915	111780	126520	0	0	0	59284	67999	75780	0	0	0
A0A4X1SG83	TRASH domain-containing protein	tr|A0A4X1SG83|A0A4X1SG83_PIG TRASH domain-containing protein OS=Sus scrofa OX=9823 GN=RPL24 PE=3 SV=1;tr|A0A287A286|A0A287A286_PIG TRASH domain-containing protein OS=Sus scrofa OX=9823 GN=RPL24 PE=1 SV=1;tr|A0A5G2QF82|A0A5G2QF82_PIG TRASH domain-containing	8	4	20.7	24.707	217	0.0098765	1.6971	14	729980	539010	769596	0	0	0	301540	208970	361320	477080	937940	817113	99851	472660	421820
A0A4X1U7P7	Transposase_22 domain-containing protein	tr|A0A4X1U7P7|A0A4X1U7P7_PIG Transposase_22 domain-containing protein OS=Sus scrofa OX=9823 PE=4 SV=1	1	1	7.7	16.765	143	0.61392	0.1596	1	68130	456058	41554	0	0	0	0	0	0	0	0	0	0	0	0
A0A5G2QND1	Transporter	tr|A0A5G2QND1|A0A5G2QND1_PIG Transporter OS=Sus scrofa OX=9823 GN=SLC6A14 PE=3 SV=1;tr|K7GNX7|K7GNX7_PIG Transporter OS=Sus scrofa OX=9823 GN=SLC6A14 PE=3 SV=1;tr|A0A4X1W4T9|A0A4X1W4T9_PIG Transporter OS=Sus scrofa OX=9823 GN=SLC6A14 PE=3 SV=1;tr|C8CBZ0|C8	7	1	3.3	71.28	632	0.61525	0.15329	1	316730	171060	2037423	0	0	0	0	0	0	0	0	0	0	0	0
A0A481BAF4	Transport and Golgi organization protein 6 homolog	tr|A0A481BAF4|A0A481BAF4_PIG Transport and Golgi organization protein 6 homolog OS=Sus scrofa OX=9823 PE=3 SV=1;tr|A0A4X1VPE7|A0A4X1VPE7_PIG RTP1_C1 domain-containing protein OS=Sus scrofa OX=9823 PE=3 SV=1;tr|A0A287BPU8|A0A287BPU8_PIG Uncharacterized prot	3	1	1.6	91.052	829	0.65506	0.066371	1	0	0	0	30274	160140	38294	0	0	0	0	0	0	0	0	0
I3LGQ6	Transmembrane serine protease 3	tr|I3LGQ6|I3LGQ6_PIG Transmembrane serine protease 3 OS=Sus scrofa OX=9823 GN=TMPRSS3 PE=4 SV=2	1	2	4.7	60.381	557	0.46839	0.31977	3	504735	1036600	1906453	0	0	0	165990	188040	363269	0	0	0	0	0	0
A0A0E3M2Q4	Transmembrane secretory component poly-Ig receptor (Fragment)	tr|A0A0E3M2Q4|A0A0E3M2Q4_PIG Transmembrane secretory component poly-Ig receptor (Fragment) OS=Sus scrofa OX=9823 PE=2 SV=1;tr|A0A5G2RA19|A0A5G2RA19_PIG Polymeric immunoglobulin receptor OS=Sus scrofa OX=9823 GN=PIGR PE=1 SV=1;tr|A0A4X1UL87|A0A4X1UL87_PIG P	12	1	2.6	67.307	614	0.65052	0.088745	1	204000	392080	283270	0	0	0	0	0	0	0	0	0	0	0	0
A0A287ABU7	Transmembrane protein 94	tr|A0A287ABU7|A0A287ABU7_PIG Transmembrane protein 94 OS=Sus scrofa OX=9823 GN=TMEM94 PE=4 SV=1	1	1	0.8	154.88	1399	0.61456	0.16056	1	0	0	0	0	0	0	168820	207740	123280	0	0	0	0	0	0
A0A5G2QWN7	Transmembrane protein 87A	tr|A0A5G2QWN7|A0A5G2QWN7_PIG Transmembrane protein 87A OS=Sus scrofa OX=9823 GN=TMEM87A PE=4 SV=1;tr|A0A481CDE1|A0A481CDE1_PIG Transmembrane protein 87A isoform 1 OS=Sus scrofa OX=9823 PE=4 SV=1;tr|F1SFK6|F1SFK6_PIG Transmembrane protein 87A OS=Sus scrofa	7	1	7.9	19.833	178	0.55017	0.23496	1	1647000	2206400	1394632	0	0	0	0	0	0	0	0	0	0	0	0
F1RRP8	Transmembrane protein 65	tr|F1RRP8|F1RRP8_PIG Transmembrane protein 65 OS=Sus scrofa OX=9823 GN=TMEM65 PE=1 SV=2;tr|A0A5G2Q8G1|A0A5G2Q8G1_PIG Transmembrane protein 65 OS=Sus scrofa OX=9823 GN=TMEM65 PE=1 SV=1;tr|A0A4X1T127|A0A4X1T127_PIG Uncharacterized protein OS=Sus scrofa OX=98	9	1	3.9	24.065	228	0.61063	0.16916	1	0	0	0	0	0	0	274440	126540	99581	0	0	0	0	0	0
A0A480FES0	Transmembrane protein 52 isoform X1	tr|A0A480FES0|A0A480FES0_PIG Transmembrane protein 52 isoform X1 OS=Sus scrofa OX=9823 PE=4 SV=1	1	1	6.1	22.736	214	0.55325	0.22939	1	0	0	0	0	0	0	0	0	0	158880	57934	173210	0	0	0
F2Z5B3	Transmembrane protein 47	tr|F2Z5B3|F2Z5B3_PIG Transmembrane protein 47 OS=Sus scrofa OX=9823 GN=TMEM47 PE=3 SV=1;tr|A0A4X1VH18|A0A4X1VH18_PIG Uncharacterized protein OS=Sus scrofa OX=9823 GN=TMEM47 PE=3 SV=1	2	1	6.1	19.997	181	0.65808	0.052399	1	0	0	0	0	0	0	93223	107880	248700	0	0	0	0	0	0
A0A287B182	Transmembrane protein 263	tr|A0A287B182|A0A287B182_PIG Transmembrane protein 263 OS=Sus scrofa OX=9823 GN=TMEM263 PE=1 SV=1;tr|A0A4X1WCX7|A0A4X1WCX7_PIG Uncharacterized protein OS=Sus scrofa OX=9823 GN=TMEM263 PE=3 SV=1;tr|A0A5G2QVT2|A0A5G2QVT2_PIG Transmembrane protein 263 OS=Sus	3	2	22.4	11.691	116	0.18911	0.67622	4	0	0	0	0	0	0	0	0	0	64668	129740	139880	187556	138320	141667
F1RWA5	Transmembrane protein 236	tr|F1RWA5|F1RWA5_PIG Transmembrane protein 236 OS=Sus scrofa OX=9823 GN=TMEM236 PE=1 SV=3;tr|A0A4X1U9X2|A0A4X1U9X2_PIG Uncharacterized protein OS=Sus scrofa OX=9823 GN=TMEM236 PE=4 SV=1	2	1	2.6	39.801	349	0.53295	0.25615	1	0	0	0	0	0	0	128840	128890	111450	0	0	0	0	0	0
A0A287AXK5	Transmembrane protein 234	tr|A0A287AXK5|A0A287AXK5_PIG Transmembrane protein 234 OS=Sus scrofa OX=9823 GN=TMEM234 PE=3 SV=2	1	1	4.9	29.978	284	0.48981	0.2969	1	0	0	0	53616	163330	263610	0	0	0	0	0	0	0	0	0
A0A5K1U2A8	Transmembrane protein 209	tr|A0A5K1U2A8|A0A5K1U2A8_PIG Transmembrane protein 209 OS=Sus scrofa OX=9823 GN=TMEM209 PE=4 SV=1	1	1	2.3	58.61	522	0.26326	0.61883	1	0	0	0	0	0	0	230680	196330	116760	0	0	0	0	0	0
A0A4X1UJI3	Transmembrane protein 208	tr|A0A4X1UJI3|A0A4X1UJI3_PIG Transmembrane protein 208 OS=Sus scrofa OX=9823 GN=TMEM208 PE=3 SV=1	1	1	31.1	11.786	103	0.17977	0.72372	1	0	0	0	226480	5748.3	6829.5	0	0	0	0	0	0	0	0	0
A0A287BP26	Transmembrane protein 200C	tr|A0A287BP26|A0A287BP26_PIG Transmembrane protein 200C OS=Sus scrofa OX=9823 GN=TMEM200C PE=3 SV=2	1	2	3.4	64.064	626	0.53579	0.24868	2	0	0	0	54936	254800	59036	0	0	0	0	0	0	181550	74094	43245
I3L741	Transmembrane protein 184C	tr|I3L741|I3L741_PIG Transmembrane protein 184C OS=Sus scrofa OX=9823 GN=TMEM184C PE=4 SV=3;tr|A0A4X1SGR0|A0A4X1SGR0_PIG Uncharacterized protein OS=Sus scrofa OX=9823 PE=4 SV=1;tr|A0A287ANR7|A0A287ANR7_PIG Transmembrane protein 184C OS=Sus scrofa OX=9823 G	6	1	3.8	30.681	262	0.6519	0.080814	1	0	0	0	0	0	0	32297	23990	14987	0	0	0	0	0	0
A0A480ZRE4	Transmembrane protein 176A isoform X4	tr|A0A480ZRE4|A0A480ZRE4_PIG Transmembrane protein 176A isoform X4 OS=Sus scrofa OX=9823 PE=3 SV=1;tr|A0A4X1UUY5|A0A4X1UUY5_PIG Uncharacterized protein OS=Sus scrofa OX=9823 GN=TMEM176A PE=3 SV=1;tr|A0A481B930|A0A481B930_PIG Transmembrane protein 176A isof	9	2	9.4	27.272	255	0.45402	0.33983	2	0	0	0	41227	42173	10787	115530	462180	147770	0	0	0	0	0	0
A0A287AQL7	Transmembrane protein 161A	tr|A0A287AQL7|A0A287AQL7_PIG Transmembrane protein 161A OS=Sus scrofa OX=9823 GN=TMEM161A PE=3 SV=1;tr|A0A4X1U5Y8|A0A4X1U5Y8_PIG Uncharacterized protein OS=Sus scrofa OX=9823 PE=3 SV=1;tr|A0A4X1U0S0|A0A4X1U0S0_PIG Uncharacterized protein OS=Sus scrofa OX=9	5	1	4.4	48.682	432	0.19368	0.66311	1	0	0	0	7457400	813770	24462	0	0	0	0	0	0	0	0	0
F1RM05	Transmembrane protein 160	tr|F1RM05|F1RM05_PIG Transmembrane protein 160 OS=Sus scrofa OX=9823 GN=TMEM160 PE=4 SV=1;tr|A0A4X1W337|A0A4X1W337_PIG Uncharacterized protein OS=Sus scrofa OX=9823 GN=TMEM160 PE=4 SV=1	2	1	5.3	19.465	188	0.52726	0.26001	1	0	0	0	0	0	0	0	0	0	0	0	0	334710	1198000	242060
A0A5G2QRE0	Transmembrane protein 151A	tr|A0A5G2QRE0|A0A5G2QRE0_PIG Transmembrane protein 151A OS=Sus scrofa OX=9823 GN=TMEM151A PE=3 SV=1;tr|F1RU42|F1RU42_PIG Transmembrane protein 151A OS=Sus scrofa OX=9823 GN=TMEM151A PE=3 SV=1;tr|A0A4X1TSM4|A0A4X1TSM4_PIG Uncharacterized protein OS=Sus scro	3	1	2.4	50.983	467	0.60376	0.17879	1	0	0	0	0	0	0	138350	176770	94241	0	0	0	0	0	0
A0A5G2Q7C2	Transmembrane protein 143	tr|A0A5G2Q7C2|A0A5G2Q7C2_PIG Transmembrane protein 143 OS=Sus scrofa OX=9823 GN=TMEM143 PE=4 SV=1;tr|A0A4X1W1Y0|A0A4X1W1Y0_PIG Uncharacterized protein OS=Sus scrofa OX=9823 GN=TMEM143 PE=4 SV=1;tr|A0A4X1W053|A0A4X1W053_PIG Uncharacterized protein OS=Sus sc	7	1	5.3	27.634	264	0.54109	0.24315	1	0	0	0	0	0	0	0	0	0	0	0	0	361840	1281200	254060
A0A287B9D9	Transmembrane protein 135	tr|A0A287B9D9|A0A287B9D9_PIG Transmembrane protein 135 OS=Sus scrofa OX=9823 GN=TMEM135 PE=3 SV=2	1	1	4.7	48.814	425	0.51824	0.26761	1	0	0	0	65440	88117	19625	12207	68845	60802	0	0	0	0	0	0
A0A5G2Q8V5	Transmembrane protein 128	tr|A0A5G2Q8V5|A0A5G2Q8V5_PIG Transmembrane protein 128 OS=Sus scrofa OX=9823 GN=TMEM128 PE=4 SV=1;tr|A0A4X1SHK0|A0A4X1SHK0_PIG Uncharacterized protein OS=Sus scrofa OX=9823 GN=TMEM128 PE=4 SV=1	2	1	5	16.232	141	0.51	0.27628	1	4503.1	3784.8	2536.7	0	0	0	0	0	0	0	0	0	0	0	0
A0A480SUY1	Transmembrane protein 119	tr|A0A480SUY1|A0A480SUY1_PIG Transmembrane protein 119 OS=Sus scrofa OX=9823 PE=4 SV=1	1	1	5.1	28.893	277	0.47249	0.31567	1	98148	716900	36206	0	0	0	0	0	0	0	0	0	0	0	0
F1RIA7	Transmembrane protein 109	tr|F1RIA7|F1RIA7_PIG Transmembrane protein 109 OS=Sus scrofa OX=9823 GN=TMEM109 PE=1 SV=1;tr|A0A4X1VLR1|A0A4X1VLR1_PIG Uncharacterized protein OS=Sus scrofa OX=9823 GN=TMEM109 PE=4 SV=1	4	3	20.2	26.11	243	0.28252	0.58601	3	123893	130900	536800	282020	13011	27792	0	0	0	159490	60173	177350	0	0	0
F1RUS3	Transmembrane protease serine	tr|F1RUS3|F1RUS3_PIG Transmembrane protease serine OS=Sus scrofa OX=9823 GN=TMPRSS11F PE=3 SV=3;tr|A0A4X1TEI3|A0A4X1TEI3_PIG Transmembrane protease serine OS=Sus scrofa OX=9823 GN=LOC100513296 PE=3 SV=1	2	1	3.2	49.984	438	0.34188	0.46258	1	0	0	0	0	0	0	253030	110290	62483	0	0	0	0	0	0
F1RNH1	Transmembrane channel-like protein	tr|F1RNH1|F1RNH1_PIG Transmembrane channel-like protein OS=Sus scrofa OX=9823 GN=TMC4 PE=3 SV=3;tr|A0A4X1VQF2|A0A4X1VQF2_PIG Transmembrane channel-like protein OS=Sus scrofa OX=9823 GN=TMC4 PE=3 SV=1	2	1	1.6	77.869	699	0.56107	0.21998	1	0	0	0	0	0	0	0	0	0	71380	59060	117460	0	0	0
I3L7J1	Transmembrane anterior posterior transformation 1	tr|I3L7J1|I3L7J1_PIG Transmembrane anterior posterior transformation 1 OS=Sus scrofa OX=9823 GN=TAPT1 PE=1 SV=3;tr|A0A4X1VCJ2|A0A4X1VCJ2_PIG Uncharacterized protein OS=Sus scrofa OX=9823 GN=TAPT1 PE=3 SV=1	2	1	1.3	84.806	779	0.58563	0.19778	1	0	0	0	0	0	0	0	0	0	0	0	0	1073300	422970	551020
F1RN69	Transmembrane and immunoglobulin domain containing 1	tr|F1RN69|F1RN69_PIG Transmembrane and immunoglobulin domain containing 1 OS=Sus scrofa OX=9823 GN=TMIGD1 PE=4 SV=3;tr|A0A4X1TY25|A0A4X1TY25_PIG Uncharacterized protein OS=Sus scrofa OX=9823 PE=4 SV=1;tr|A0A5G2RMH4|A0A5G2RMH4_PIG Transmembrane and immunogl	9	2	12.8	24.51	218	0.40107	0.39989	2	0	0	0	36238	33061	50307	0	0	0	913630	464170	610750	0	0	0
A0A286ZN56	Translocation protein SEC62	tr|A0A286ZN56|A0A286ZN56_PIG Translocation protein SEC62 OS=Sus scrofa OX=9823 GN=SEC62 PE=1 SV=2;tr|A0A5G2QSI1|A0A5G2QSI1_PIG Translocation protein SEC62 OS=Sus scrofa OX=9823 GN=SEC62 PE=1 SV=1;tr|A0A4X1V9M6|A0A4X1V9M6_PIG Translocation protein SEC62 OS=	9	1	2.5	41.254	360	0.45811	0.33314	2	35630	67667	13190	0	0	0	0	0	0	0	0	0	0	0	0
F1SA66	Translocase of inner mitochondrial membrane 44	tr|F1SA66|F1SA66_PIG Translocase of inner mitochondrial membrane 44 OS=Sus scrofa OX=9823 GN=TIMM44 PE=1 SV=2;tr|A0A4X1VID6|A0A4X1VID6_PIG Tim44 domain-containing protein OS=Sus scrofa OX=9823 GN=TIMM44 PE=3 SV=1;tr|A0A287ADX5|A0A287ADX5_PIG Mitochondrial	7	1	3	45.014	397	0.65721	0.057138	1	0	0	0	39976	34709	82390	0	0	0	0	0	0	0	0	0
A0A5G2QVA4	Translin associated factor X interacting protein 1	tr|A0A5G2QVA4|A0A5G2QVA4_PIG Translin associated factor X interacting protein 1 OS=Sus scrofa OX=9823 GN=TSNAXIP1 PE=4 SV=1;tr|A0A5G2QVU3|A0A5G2QVU3_PIG Translin associated factor X interacting protein 1 OS=Sus scrofa OX=9823 GN=TSNAXIP1 PE=4 SV=1;tr|A0A5G	6	2	3.8	79.515	679	0.18818	0.67953	2	196480	226230	31027	0	0	0	0	0	0	0	0	0	0	0	0
P61288	Translationally-controlled tumor protein	sp|P61288|TCTP_PIG Translationally-controlled tumor protein OS=Sus scrofa OX=9823 GN=TPT1 PE=2 SV=1;tr|A0A5G2QHY7|A0A5G2QHY7_PIG Translationally-controlled tumor protein OS=Sus scrofa OX=9823 GN=TPT1 PE=1 SV=1;tr|A0A4X1SEB9|A0A4X1SEB9_PIG TCTP domain-conta	8	2	15.7	19.595	172	0.25394	0.63368	4	210290	76321	10290	56281	42639	94601	204000	213850	197190	0	0	0	0	0	0
A0A4X1UIR6	Translation initiation factor eIF-2B subunit alpha	tr|A0A4X1UIR6|A0A4X1UIR6_PIG Translation initiation factor eIF-2B subunit alpha OS=Sus scrofa OX=9823 PE=3 SV=1	1	1	5.1	32.245	292	0.60022	0.18197	1	0	0	0	70744	42951	91151	0	0	0	0	0	0	0	0	0
A8U4R4	Transketolase	tr|A8U4R4|A8U4R4_PIG Transketolase OS=Sus scrofa OX=9823 GN=tkt PE=2 SV=1;tr|A0A480TX85|A0A480TX85_PIG Transketolase isoform 1 OS=Sus scrofa OX=9823 PE=4 SV=1;tr|A0A480H9Y3|A0A480H9Y3_PIG Transketolase OS=Sus scrofa OX=9823 PE=4 SV=1;tr|A0A480N609|A0A480N6	4	17	44.1	67.837	623	0	208.31	158	361300	204460	302732	1144000	1415900	1166150	1097400	1249300	1317000	808370	556460	441640	399120	624000	902260
A0A4X1VFM2	Transket_pyr domain-containing protein	tr|A0A4X1VFM2|A0A4X1VFM2_PIG Transket_pyr domain-containing protein OS=Sus scrofa OX=9823 PE=3 SV=1	1	2	3.4	109.76	974	0.4006	0.40188	1	0	0	0	192050	417410	333560	0	0	0	0	0	0	0	0	0
P03974	Transitional endoplasmic reticulum ATPase	sp|P03974|TERA_PIG Transitional endoplasmic reticulum ATPase OS=Sus scrofa OX=9823 GN=VCP PE=1 SV=5;tr|A0A4X1W1B7|A0A4X1W1B7_PIG 15S Mg(2+)-ATPase p97 subunit OS=Sus scrofa OX=9823 PE=3 SV=1;tr|A0A480IPJ6|A0A480IPJ6_PIG 15S Mg(2+)-ATPase p97 subunit OS=Sus	13	22	39.1	89.288	806	0	67.425	206	538980	780910	683990	1044700	969030	1172400	1083600	1093400	1484280	588230	495510	700060	381370	606790	421080
A0A480J8V6	Transient receptor potential cation channel subfamily V member 4 isoform X1	tr|A0A480J8V6|A0A480J8V6_PIG Transient receptor potential cation channel subfamily V member 4 isoform X1 OS=Sus scrofa OX=9823 PE=4 SV=1;tr|A0A5G2QZJ1|A0A5G2QZJ1_PIG Transient receptor potential cation channel subfamily V member 4 OS=Sus scrofa OX=9823 GN=	10	1	2.1	47.659	432	0.4397	0.35156	2	0	0	0	24848	32646	33930	39505	24970	35521	0	0	0	0	0	0
I3LAL1	Transient receptor potential cation channel subfamily M member 4	tr|I3LAL1|I3LAL1_PIG Transient receptor potential cation channel subfamily M member 4 OS=Sus scrofa OX=9823 GN=TRPM4 PE=4 SV=3;tr|A0A4X1W0Z4|A0A4X1W0Z4_PIG Uncharacterized protein OS=Sus scrofa OX=9823 PE=4 SV=1;tr|A0A480MY42|A0A480MY42_PIG Transient recep	5	1	1.2	118.29	1069	0.43651	0.35709	1	0	0	0	0	0	0	0	0	0	43754	71390	117290	0	0	0
A0A5G2QXS0	Transient receptor potential cation channel subfamily C member 7	tr|A0A5G2QXS0|A0A5G2QXS0_PIG Transient receptor potential cation channel subfamily C member 7 OS=Sus scrofa OX=9823 GN=TRPC7 PE=4 SV=1;tr|A0A4X1V0G0|A0A4X1V0G0_PIG Uncharacterized protein OS=Sus scrofa OX=9823 PE=4 SV=1;tr|A0A5G2QLF0|A0A5G2QLF0_PIG Transie	11	1	1.9	86.189	746	0.63803	0.10852	1	0	0	0	0	0	0	0	0	0	8779.2	25736	8110.3	0	0	0
F1SDX6	Transglutaminase 2	tr|F1SDX6|F1SDX6_PIG Transglutaminase 2 OS=Sus scrofa OX=9823 GN=TGM2 PE=1 SV=3;tr|A0A0B8RZZ6|A0A0B8RZZ6_PIG Transglutaminase 2 OS=Sus scrofa domesticus OX=9825 GN=TGM2 PE=3 SV=1;tr|A0A4X1TKD8|A0A4X1TKD8_PIG TGc domain-containing protein OS=Sus scrofa OX=9	4	1	1.5	77.057	685	0.50608	0.28155	1	0	0	0	105270	96333	49029	0	0	0	0	0	0	0	0	0
A0A287AIA2	Transgelin	tr|A0A287AIA2|A0A287AIA2_PIG Transgelin OS=Sus scrofa OX=9823 GN=TAGLN2 PE=1 SV=1;tr|A0A4X1VV05|A0A4X1VV05_PIG Transgelin OS=Sus scrofa OX=9823 GN=TAGLN2 PE=3 SV=1;tr|A0A287AK21|A0A287AK21_PIG Transgelin OS=Sus scrofa OX=9823 GN=TAGLN2 PE=1 SV=1;tr|A0A480U	7	3	19.3	20.963	187	0.0019417	4.5078	97	3103800	3522600	4508600	764980	913460	1197200	645290	870450	768470	323430	343450	446400	1430000	1704230	1845800
A0A480TIR0	Transforming growth factor-beta-induced protein ig-h3	tr|A0A480TIR0|A0A480TIR0_PIG Transforming growth factor-beta-induced protein ig-h3 OS=Sus scrofa OX=9823 PE=4 SV=1;tr|A0A4X1V413|A0A4X1V413_PIG Transforming growth factor-beta-induced protein ig-h3 OS=Sus scrofa OX=9823 PE=4 SV=1;tr|A0A4X1V3Z4|A0A4X1V3Z4_P	9	1	2	70.217	648	0.63051	0.13122	1	49223	39344	24638	0	0	0	0	0	0	0	0	0	0	0	0
A0A287AG59	Transforming growth factor beta receptor 3 like	tr|A0A287AG59|A0A287AG59_PIG Transforming growth factor beta receptor 3 like OS=Sus scrofa OX=9823 GN=TGFBR3L PE=4 SV=2	1	1	2.8	29.592	285	0.64025	0.10521	2	0	0	0	119380	136340	149210	51479	32886	48400	0	0	0	0	0	0
A0A4X1SKM8	Transforming growth factor beta	tr|A0A4X1SKM8|A0A4X1SKM8_PIG Transforming growth factor beta OS=Sus scrofa OX=9823 PE=3 SV=1;sp|P07200|TGFB1_PIG Transforming growth factor beta-1 proprotein OS=Sus scrofa OX=9823 GN=TGFB1 PE=1 SV=2	2	1	1.9	41.409	364	0.10164	0.93608	0	0	0	0	0	0	0	0	0	0	0	0	0	61483	212010	186790
A0A480XNQ3	Transforming acidic coiled-coil-containing protein 1 isoform 9	tr|A0A480XNQ3|A0A480XNQ3_PIG Transforming acidic coiled-coil-containing protein 1 isoform 9 OS=Sus scrofa OX=9823 PE=4 SV=1;tr|A0A287BJ18|A0A287BJ18_PIG Transforming acidic coiled-coil-containing protein 1 isoform 10 OS=Sus scrofa OX=9823 GN=TACC1 PE=3 SV=	23	1	2	46.769	440	0.64981	0.083004	1	0	0	0	0	0	0	131390	136720	615590	0	0	0	0	0	0
A0A5G2QFH4	Transformer 2 beta homolog	tr|A0A5G2QFH4|A0A5G2QFH4_PIG Transformer 2 beta homolog OS=Sus scrofa OX=9823 GN=TRA2B PE=1 SV=1;tr|A0A287B7C6|A0A287B7C6_PIG Transformer 2 beta homolog OS=Sus scrofa OX=9823 GN=TRA2B PE=1 SV=1;tr|Q06AA7|Q06AA7_PIG TRA2B OS=Sus scrofa OX=9823 GN=TRA2B PE=1	4	1	5.3	21.935	188	0.053537	1.1427	3	0	0	0	169090	230283	276500	139290	173937	129304	0	0	0	0	0	0
A0A480TZA5	Transferrin receptor protein 1 isoform X1	tr|A0A480TZA5|A0A480TZA5_PIG Transferrin receptor protein 1 isoform X1 OS=Sus scrofa OX=9823 PE=4 SV=1;sp|Q8HZV3|TFR1_PIG Transferrin receptor protein 1 OS=Sus scrofa OX=9823 GN=TFRC PE=2 SV=1;tr|D7RK08|D7RK08_PIG Transferrin receptor protein 1 OS=Sus scro	6	2	5.6	59.273	536	0.0046012	2.5838	14	210390	288690	232468	90323	79807	121917	0	0	0	0	0	0	0	0	0
A0A5G2R8X4	Transferrin receptor 2	tr|A0A5G2R8X4|A0A5G2R8X4_PIG Transferrin receptor 2 OS=Sus scrofa OX=9823 GN=TFR2 PE=4 SV=1;tr|A0A5G2RNI6|A0A5G2RNI6_PIG Transferrin receptor 2 OS=Sus scrofa OX=9823 GN=TFR2 PE=1 SV=1;tr|A0A5G2QD61|A0A5G2QD61_PIG Transferrin receptor 2 OS=Sus scrofa OX=982	6	1	3.1	43.336	392	0.62985	0.13283	1	0	0	0	1738400	198810	20381	0	0	0	0	0	0	0	0	0
F1S1J7	Transcriptional repressor GATA binding 1	tr|F1S1J7|F1S1J7_PIG Transcriptional repressor GATA binding 1 OS=Sus scrofa OX=9823 GN=TRPS1 PE=4 SV=4;tr|A0A4X1T9Q9|A0A4X1T9Q9_PIG Uncharacterized protein OS=Sus scrofa OX=9823 PE=4 SV=1;tr|A0A4X1TBC4|A0A4X1TBC4_PIG Uncharacterized protein OS=Sus scrofa O	6	1	1.1	127.75	1160	0.55417	0.22768	1	0	0	0	0	0	0	0	0	0	40728	58202	94306	0	0	0
A0A480LYL5	Transcription initiation factor TFIID 150 kDa subunit	tr|A0A480LYL5|A0A480LYL5_PIG Transcription initiation factor TFIID 150 kDa subunit OS=Sus scrofa OX=9823 PE=3 SV=1;tr|A0A480ZQL0|A0A480ZQL0_PIG Transcription initiation factor TFIID 150 kDa subunit OS=Sus scrofa OX=9823 PE=3 SV=1;tr|A0A481A4D9|A0A481A4D9_P	10	1	1.6	118.72	1036	0.63552	0.11358	1	0	0	0	0	0	0	208650	223120	219920	0	0	0	0	0	0
A0A4X1T4G1	Transcription initiation factor IIE subunit alpha	tr|A0A4X1T4G1|A0A4X1T4G1_PIG Transcription initiation factor IIE subunit alpha OS=Sus scrofa OX=9823 PE=3 SV=1	1	1	2.6	51.702	461	0.30075	0.55213	1	0	0	0	0	0	0	0	0	0	90332	63230	141200	325150	115810	110440
A5A764	Transcription factor S	tr|A5A764|A5A764_PIG Transcription factor SOX-18 (Fragment) OS=Sus scrofa OX=9823 GN=SOX18 PE=2 SV=1	1	1	3.3	31.948	299	0.33585	0.48079	1	0	0	0	0	0	0	0	0	0	142090	77759	57582	0	0	0
A0A4X1VKP4	Transcription factor PU.1	tr|A0A4X1VKP4|A0A4X1VKP4_PIG Transcription factor PU.1 OS=Sus scrofa OX=9823 GN=SPI1 PE=3 SV=1	1	1	10.1	30.772	268	0.59263	0.19208	1	257450	340386	50263	0	0	0	0	0	0	0	0	0	0	0	0
A0A481B2C2	Transcription factor GATA-4 isoform 2	tr|A0A481B2C2|A0A481B2C2_PIG Transcription factor GATA-4 isoform 2 OS=Sus scrofa OX=9823 PE=4 SV=1;tr|Q8MIM5|Q8MIM5_PIG Transcription factor GATA-4 OS=Sus scrofa OX=9823 PE=2 SV=1;tr|I3LUZ9|I3LUZ9_PIG GATA binding protein 4 OS=Sus scrofa OX=9823 GN=GATA4 P	3	1	2.7	41.114	408	0.57595	0.20976	1	0	0	0	50453	245120	55904	0	0	0	0	0	0	0	0	0
A0A5G2QNX6	Transcription factor EB	tr|A0A5G2QNX6|A0A5G2QNX6_PIG Transcription factor EB OS=Sus scrofa OX=9823 GN=TFEB PE=3 SV=1;tr|A0A4X1SKK8|A0A4X1SKK8_PIG BHLH domain-containing protein OS=Sus scrofa OX=9823 GN=TFEB PE=3 SV=1;tr|I3LH97|I3LH97_PIG Transcription factor EB OS=Sus scrofa OX=9	9	1	3.3	43.543	391	0.20183	0.63435	0	5547.8	73427	19570	0	0	0	0	0	0	0	0	0	0	0	0
A0A480LMS5	Transcription factor C	tr|A0A480LMS5|A0A480LMS5_PIG Transcription factor COE4 OS=Sus scrofa OX=9823 PE=3 SV=1	1	1	2.5	67.722	640	0.54339	0.24186	1	0	0	0	0	0	0	0	0	0	509380	220250	293520	0	0	0
A0A4X1SNH4	Transcription factor BTF3	tr|A0A4X1SNH4|A0A4X1SNH4_PIG Transcription factor BTF3 OS=Sus scrofa OX=9823 GN=BTF3 PE=3 SV=1;tr|F2Z5H8|F2Z5H8_PIG Transcription factor BTF3 OS=Sus scrofa OX=9823 GN=BTF3 PE=1 SV=3;tr|A0A4X1SML6|A0A4X1SML6_PIG Transcription factor BTF3 OS=Sus scrofa OX=98	7	4	50.6	17.699	162	0.0021053	6.0832	11	503870	509670	192073	396650	290500	703020	640540	394030	75841	546590	690010	734300	0	0	0
Q9GL64	Transcription factor A (Fragment)	tr|Q9GL64|Q9GL64_PIG Transcription factor A (Fragment) OS=Sus scrofa OX=9823 GN=Tfam PE=2 SV=1;sp|Q5D144|TFAM_PIG Transcription factor A, mitochondrial OS=Sus scrofa OX=9823 GN=TFAM PE=2 SV=1;tr|A0A5G2RGV8|A0A5G2RGV8_PIG Transcription factor A, mitochondri	4	2	20.1	17.883	149	0.31953	0.51304	2	0	0	0	12783	90538	15547	0	0	0	60060	40245	77931	0	0	0
A0A4X1TKU6	Transcription factor	tr|A0A4X1TKU6|A0A4X1TKU6_PIG Transcription factor OS=Sus scrofa OX=9823 PE=3 SV=1;tr|A0A287AEV5|A0A287AEV5_PIG Transcription factor OS=Sus scrofa OX=9823 GN=TFDP2 PE=3 SV=2;tr|A0A287AWD4|A0A287AWD4_PIG Transcription factor OS=Sus scrofa OX=9823 GN=TFDP2 PE	6	1	7.8	32.997	295	0.6161	0.15011	1	0	0	0	0	0	0	78625	49269	31139	0	0	0	0	0	0
A0A4X1TTU8	Transcription elongation factor spt6	tr|A0A4X1TTU8|A0A4X1TTU8_PIG Transcription elongation factor spt6 OS=Sus scrofa OX=9823 PE=3 SV=1;tr|A0A480XVE4|A0A480XVE4_PIG Transcription elongation factor spt6 OS=Sus scrofa OX=9823 PE=3 SV=1;tr|A0A0B8RS82|A0A0B8RS82_PIG Transcription elongation factor	4	1	0.9	199.13	1726	0.62749	0.13648	1	48419	26733	23895	0	0	0	0	0	0	0	0	0	0	0	0
A0A481D0Y1	Transcription elongation factor SPT5	tr|A0A481D0Y1|A0A481D0Y1_PIG Transcription elongation factor SPT5 OS=Sus scrofa OX=9823 PE=3 SV=1	1	1	1.2	118.89	1067	0.60855	0.17529	1	256900	161740	1282600	0	0	0	0	0	0	0	0	0	0	0	0
A0A4X1SL69	Transcription elongation factor SPT4	tr|A0A4X1SL69|A0A4X1SL69_PIG Transcription elongation factor SPT4 OS=Sus scrofa OX=9823 GN=SUPT4H1 PE=3 SV=1;tr|A0A480VIE8|A0A480VIE8_PIG Transcription elongation factor SPT4 OS=Sus scrofa OX=9823 PE=3 SV=1	2	1	8.5	13.193	117	0.43403	0.36122	1	0	0	0	0	0	0	0	0	0	63921	16758	42495	0	0	0
F1RSG8	Transcription elongation factor A1	tr|F1RSG8|F1RSG8_PIG Transcription elongation factor A1 OS=Sus scrofa OX=9823 GN=TCEA1 PE=1 SV=4;tr|A0A287BHY1|A0A287BHY1_PIG Transcription elongation factor A1 OS=Sus scrofa OX=9823 GN=TCEA1 PE=1 SV=2;tr|A0A5G2R313|A0A5G2R313_PIG Transcription elongation	19	3	35	13.397	117	0.0021142	6.1344	56	291780	118940	232560	178850	216850	418950	170210	209610	223484	128770	133070	252960	294020	202860	261790
F1RYC8	Transcription elongation factor A protein-like 1	tr|F1RYC8|F1RYC8_PIG Transcription elongation factor A protein-like 1 OS=Sus scrofa OX=9823 GN=TCEAL1 PE=3 SV=2	4	3	8.1	28.178	247	0.021789	1.5007	3	74102	20384	17500	92370	26134	29319	232777	148280	904670	0	0	0	0	0	0
F1SRI2	Transcription elongation factor A N-terminal and central domain containing	tr|F1SRI2|F1SRI2_PIG Transcription elongation factor A N-terminal and central domain containing OS=Sus scrofa OX=9823 GN=TCEANC PE=4 SV=2	1	1	5.7	39.539	352	0.6099	0.17002	1	55016	97717	100173	0	0	0	0	0	0	0	0	0	0	0	0
A0A4X1U732	Transcription and mRNA export factor ENY2	tr|A0A4X1U732|A0A4X1U732_PIG Transcription and mRNA export factor ENY2 OS=Sus scrofa OX=9823 GN=ENY2 PE=3 SV=1;tr|A0A4X1TFA2|A0A4X1TFA2_PIG Transcription and mRNA export factor ENY2 OS=Sus scrofa OX=9823 GN=ENY2 PE=3 SV=1;tr|A0A286ZK95|A0A286ZK95_PIG Trans	3	1	17.9	10.87	95	0.53289	0.25489	5	0	0	0	220590	288493	355070	188490	136690	239403	153280	328362	342830	0	0	0
F1RYY6	Transaldolase	tr|F1RYY6|F1RYY6_PIG Transaldolase OS=Sus scrofa OX=9823 GN=TALDO1 PE=1 SV=3;tr|A0A4X1VXM7|A0A4X1VXM7_PIG Transaldolase OS=Sus scrofa OX=9823 PE=3 SV=1;tr|A0A287BQ72|A0A287BQ72_PIG Transaldolase OS=Sus scrofa OX=9823 GN=TALDO1 PE=1 SV=1;tr|A0A4X1VY23|A0A4X	4	2	6.5	37.418	337	0.50352	0.28597	2	454953	197500	1961600	0	0	0	25218	97447	150860	0	0	0	0	0	0
A0A5G2RFU3	Trans-1,2-dihydrobenzene-1,2-diol dehydrogenase	tr|A0A5G2RFU3|A0A5G2RFU3_PIG Trans-1,2-dihydrobenzene-1,2-diol dehydrogenase OS=Sus scrofa OX=9823 GN=DHDH PE=4 SV=1;tr|A0A4X1VUC8|A0A4X1VUC8_PIG Trans-1,2-dihydrobenzene-1,2-diol dehydrogenase OS=Sus scrofa OX=9823 GN=DHDH PE=4 SV=1;tr|A0A5S6FWI2|A0A5S6FW	10	1	5.6	21.391	196	0.59436	0.19034	1	0	0	0	0	0	0	0	0	0	625610	702180	887620	0	0	0
A6P364	TRAJ49 protein (Fragment)	tr|A6P364|A6P364_PIG TRAJ49 protein (Fragment) OS=Sus scrofa OX=9823 GN=TRAJ49 PE=4 SV=1	1	1	52.9	1.9521	17	0.29266	0.56425	1	0	0	0	0	0	0	0	0	0	0	0	0	99797	48122	11411
A0A480HIN1	Trafficking protein particle complex subunit 9	tr|A0A480HIN1|A0A480HIN1_PIG Trafficking protein particle complex subunit 9 OS=Sus scrofa OX=9823 PE=3 SV=1;tr|A0A481DF74|A0A481DF74_PIG Trafficking protein particle complex subunit 9 OS=Sus scrofa OX=9823 PE=3 SV=1;tr|A0A481DC94|A0A481DC94_PIG Trafficking	18	1	1.6	109.56	982	0.63221	0.12348	1	0	0	0	0	0	0	12979	26721	7210.9	0	0	0	0	0	0
I3LIZ4	TRAF3 interacting protein 1	tr|I3LIZ4|I3LIZ4_PIG TRAF3 interacting protein 1 OS=Sus scrofa OX=9823 GN=TRAF3IP1 PE=4 SV=2;tr|A0A4X1T521|A0A4X1T521_PIG Uncharacterized protein OS=Sus scrofa OX=9823 PE=4 SV=1	2	1	2.1	70.763	632	0.53106	0.25714	1	0	0	0	0	0	0	103820	123590	86254	0	0	0	0	0	0
A6P382	TRADV7 protein (Fragment)	tr|A6P382|A6P382_PIG TRADV7 protein (Fragment) OS=Sus scrofa OX=9823 GN=TRADV7 PE=4 SV=1	1	2	33.3	11.474	99	0.36523	0.44126	2	0	0	0	0	0	0	0	0	0	0	0	0	2640900	1284000	1101500
Q06AA6	TRA2A	tr|Q06AA6|Q06AA6_PIG TRA2A OS=Sus scrofa OX=9823 PE=2 SV=1;tr|A0A4X1T3E7|A0A4X1T3E7_PIG RRM domain-containing protein OS=Sus scrofa OX=9823 GN=TRA2A PE=4 SV=1;tr|A0A288CG19|A0A288CG19_PIG Transformer 2 alpha homolog OS=Sus scrofa OX=9823 GN=TRA2A PE=1 SV=1	4	1	5	32.312	279	0.44274	0.34812	1	0	0	0	0	0	0	208940	227650	239340	0	0	0	0	0	0
A0A4X1VST4	Tr-type G domain-containing protein	tr|A0A4X1VST4|A0A4X1VST4_PIG Tr-type G domain-containing protein OS=Sus scrofa OX=9823 GN=EEF2 PE=3 SV=1;tr|A0A287AWI9|A0A287AWI9_PIG Elongation factor 2 OS=Sus scrofa OX=9823 PE=3 SV=1;tr|I3LII3|I3LII3_PIG Eukaryotic translation elongation factor 2 OS=Sus	6	33	49.8	95.353	858	0	223.93	416	1160500	1236500	1123500	1622100	1381100	1903624	1705000	1149900	1106000	612040	367480	597600	296740	381350	210290
A0A286ZT52	TPR_REGION domain-containing protein	tr|A0A286ZT52|A0A286ZT52_PIG TPR_REGION domain-containing protein OS=Sus scrofa OX=9823 GN=PSMC3 PE=1 SV=2;tr|A0A4X1VR62|A0A4X1VR62_PIG TPR_REGION domain-containing protein OS=Sus scrofa OX=9823 GN=RAPSN PE=3 SV=1;tr|A0A5G2QSU8|A0A5G2QSU8_PIG AAA domain-co	17	6	13.6	69.178	617	0.0056259	2.1249	21	0	0	0	157100	163380	209920	192150	118530	262550	112970	149700	318380	317640	190140	217620
A0A480PG16	TP53-binding protein 1 isoform X2	tr|A0A480PG16|A0A480PG16_PIG TP53-binding protein 1 isoform X2 OS=Sus scrofa OX=9823 PE=4 SV=1;tr|A0A480TMT8|A0A480TMT8_PIG TP53-binding protein 1 isoform X2 OS=Sus scrofa OX=9823 PE=4 SV=1;tr|A0A480LTE2|A0A480LTE2_PIG TP53-binding protein 1 isoform X2 OS=	13	1	0.7	146.67	1357	0.55544	0.22578	1	0	0	0	0	0	0	0	0	0	0	0	0	188840	95183	60467
A0A4X1TFB9	Tower domain-containing protein	tr|A0A4X1TFB9|A0A4X1TFB9_PIG Tower domain-containing protein OS=Sus scrofa OX=9823 PE=4 SV=1;tr|A0A4X1TDX4|A0A4X1TDX4_PIG Tower domain-containing protein OS=Sus scrofa OX=9823 PE=4 SV=1;tr|A0A4X1TEY0|A0A4X1TEY0_PIG Tower domain-containing protein OS=Sus sc	6	1	0.7	368.15	3282	0.65736	0.056794	1	0	0	0	199790	551930	534870	0	0	0	0	0	0	0	0	0
A0A287AVD5	Toll/interleukin-1 receptor domain-containing adapter protein	tr|A0A287AVD5|A0A287AVD5_PIG Toll/interleukin-1 receptor domain-containing adapter protein OS=Sus scrofa OX=9823 GN=TIRAP PE=4 SV=1	1	1	5.3	26.53	243	0.58016	0.2063	1	58073	103560	29046	0	0	0	0	0	0	0	0	0	0	0	0
D3JEM4	Toll-like receptor 9	tr|D3JEM4|D3JEM4_PIG Toll-like receptor 9 OS=Sus scrofa OX=9823 GN=TLR9 PE=2 SV=1	1	1	1	115.9	1030	0.65988	0.035261	1	0	0	0	0	0	0	53173	38945	19242	0	0	0	0	0	0
A5JVA2	Toll-like receptor 8	tr|A5JVA2|A5JVA2_PIG Toll-like receptor 8 OS=Sus scrofa OX=9823 GN=TLR8 PE=2 SV=1	1	1	1.5	118.87	1028	0.58226	0.20381	1	0	0	0	284800	13290	31179	0	0	0	0	0	0	0	0	0
Q5QJA1	Toll-like receptor 2 mutant	tr|Q5QJA1|Q5QJA1_PIG Toll-like receptor 2 mutant OS=Sus scrofa OX=9823 PE=2 SV=1;tr|A0A4X1SRY4|A0A4X1SRY4_PIG Toll-like receptor 2 OS=Sus scrofa OX=9823 GN=TLR2 PE=3 SV=1;tr|Q76L24|Q76L24_PIG Toll-like receptor 2 OS=Sus scrofa OX=9823 GN=TLR-2 PE=2 SV=1;tr	9	1	2.7	61.988	554	0.51466	0.27042	1	9893	14428	2368.2	0	0	0	0	0	0	0	0	0	0	0	0
A0A4X1U4P4	Tnp_22_dsRBD domain-containing protein	tr|A0A4X1U4P4|A0A4X1U4P4_PIG Tnp_22_dsRBD domain-containing protein OS=Sus scrofa OX=9823 PE=4 SV=1	1	1	13.1	9.9317	84	0.19573	0.65805	0	0	0	0	0	0	0	150960	269260	159740	0	0	0	0	0	0
A0A4X1UVM4	TNFR-Cys domain-containing protein	tr|A0A4X1UVM4|A0A4X1UVM4_PIG TNFR-Cys domain-containing protein OS=Sus scrofa OX=9823 GN=CD27 PE=4 SV=1	1	1	1.8	48.033	443	0.43365	0.36489	1	6274.8	91103	71306	0	0	0	0	0	0	0	0	0	0	0	0
A0A481CAM2	TNFAIP3-interacting protein 2 isoform 1	tr|A0A481CAM2|A0A481CAM2_PIG TNFAIP3-interacting protein 2 isoform 1 OS=Sus scrofa OX=9823 PE=4 SV=1;tr|A0A5G2R901|A0A5G2R901_PIG TNFAIP3 interacting protein 2 OS=Sus scrofa OX=9823 GN=TNIP2 PE=4 SV=1;tr|A0A4X1SZ64|A0A4X1SZ64_PIG CCHC NOA-type domain-conta	5	1	4.3	35.974	323	0.42521	0.37945	1	0	0	0	0	0	0	0	0	0	0	0	0	59603	32991	33737
A0A4X1TT78	TNF receptor-associated factor	tr|A0A4X1TT78|A0A4X1TT78_PIG TNF receptor-associated factor OS=Sus scrofa OX=9823 GN=TRAF3 PE=3 SV=1	1	1	1.8	61.911	541	0.58643	0.20009	1	0	0	0	0	0	0	140180	191300	148740	0	0	0	745600	229960	371070
A0A5G2QSC2	TNF receptor associated protein 1	tr|A0A5G2QSC2|A0A5G2QSC2_PIG TNF receptor associated protein 1 OS=Sus scrofa OX=9823 GN=TRAP1 PE=1 SV=1;tr|A0A4X1VSD3|A0A4X1VSD3_PIG HATPase_c domain-containing protein OS=Sus scrofa OX=9823 PE=3 SV=1;tr|A0A4X1VSY7|A0A4X1VSY7_PIG HATPase_c domain-containin	11	5	9.1	73.788	647	0.0054054	1.9595	23	0	0	0	140550	110680	166330	184970	101580	128393	62242	125650	148090	106240	48686	41048
A0A5G2RNN3	TNF alpha induced protein 2	tr|A0A5G2RNN3|A0A5G2RNN3_PIG TNF alpha induced protein 2 OS=Sus scrofa OX=9823 GN=TNFAIP2 PE=3 SV=1;tr|A0A4X1TTY6|A0A4X1TTY6_PIG Uncharacterized protein OS=Sus scrofa OX=9823 PE=3 SV=1;tr|A0A287AZQ5|A0A287AZQ5_PIG TNF alpha induced protein 2 OS=Sus scrofa	3	1	1.4	73.141	655	0.54543	0.24085	1	194100	191430	145640	0	0	0	0	0	0	0	0	0	0	0	0
A0A5G2RG24	TMEM9 domain family member B	tr|A0A5G2RG24|A0A5G2RG24_PIG TMEM9 domain family member B OS=Sus scrofa OX=9823 GN=TMEM9B PE=1 SV=1	1	2	9.3	28.928	257	0.16887	0.74428	2	162460	345220	76966	0	0	0	0	0	0	0	0	0	95879	44473	32871
A0A287A3F1	TLE_N domain-containing protein	tr|A0A287A3F1|A0A287A3F1_PIG TLE_N domain-containing protein OS=Sus scrofa OX=9823 GN=TLE5 PE=3 SV=1;tr|A0A4X1VS32|A0A4X1VS32_PIG TLE_N domain-containing protein OS=Sus scrofa OX=9823 PE=3 SV=1;tr|A0A4X1VUL3|A0A4X1VUL3_PIG TLE_N domain-containing protein O	3	1	7.1	21.97	197	0.51953	0.26729	1	0	0	0	0	0	0	0	0	0	0	0	0	50396	159650	169030
A0A4X1TFT1	TLC domain-containing protein	tr|A0A4X1TFT1|A0A4X1TFT1_PIG TLC domain-containing protein OS=Sus scrofa OX=9823 GN=TRAM2 PE=3 SV=1	1	1	2.5	58.163	522	0.18624	0.6861	1	0	0	0	76818	92103	61073	0	0	0	0	0	0	0	0	0
A0A480SPW8	Titin isoform novex-3	tr|A0A480SPW8|A0A480SPW8_PIG Titin isoform novex-3 OS=Sus scrofa OX=9823 PE=4 SV=1;tr|A0A480HZT1|A0A480HZT1_PIG Titin OS=Sus scrofa OX=9823 PE=4 SV=1;tr|A0A480RYN6|A0A480RYN6_PIG Titin isoform novex-3 OS=Sus scrofa OX=9823 PE=4 SV=1;tr|A0A480J3J1|A0A480J3J	5	3	0.9	615.9	5463	0.11207	0.89185	2	0	0	0	57441	16065	12720	571220	448550	103640	0	0	0	0	0	0
B5ST96	Tissue factor pathway inhibitor	tr|B5ST96|B5ST96_PIG Tissue factor pathway inhibitor OS=Sus scrofa OX=9823 GN=TFPI PE=2 SV=1;tr|A0A4X1TUD5|A0A4X1TUD5_PIG Tissue factor pathway inhibitor OS=Sus scrofa OX=9823 GN=TFPI PE=4 SV=1	2	1	6.6	34.784	303	0.36477	0.4418	1	31203	84152	38293	0	0	0	0	0	0	0	0	0	0	0	0
A0A5G2QG48	TIP120 domain-containing protein	tr|A0A5G2QG48|A0A5G2QG48_PIG TIP120 domain-containing protein OS=Sus scrofa OX=9823 GN=CAND2 PE=1 SV=1;tr|A0A481BJU4|A0A481BJU4_PIG Cullin-associated NEDD8-dissociated protein 2 isoform 1 OS=Sus scrofa OX=9823 PE=3 SV=1;tr|F1SQ89|F1SQ89_PIG TIP120 domain-c	4	1	1.1	122.45	1119	0.36619	0.44097	2	432750	1244800	680660	35745	34828	33260	0	0	0	0	0	0	0	0	0
I3L5H6	Tight junction protein 1	tr|I3L5H6|I3L5H6_PIG Tight junction protein 1 OS=Sus scrofa OX=9823 GN=TJP1 PE=1 SV=2;tr|A0A4X1UAK2|A0A4X1UAK2_PIG Uncharacterized protein OS=Sus scrofa OX=9823 GN=TJP1 PE=4 SV=1;tr|A0A4X1UBD2|A0A4X1UBD2_PIG Uncharacterized protein OS=Sus scrofa OX=9823 GN	15	6	5.6	170.07	1527	0	33.505	35	121430	56934	158710	157930	192153	346110	238480	327620	203744	92376	62103	50720	118070	74179	62132
A0A287AJD4	TIA1 cytotoxic granule associated RNA binding protein	tr|A0A287AJD4|A0A287AJD4_PIG TIA1 cytotoxic granule associated RNA binding protein OS=Sus scrofa OX=9823 GN=TIA1 PE=4 SV=1;tr|A0A4X1W3X7|A0A4X1W3X7_PIG RRM domain-containing protein OS=Sus scrofa OX=9823 GN=TIA1 PE=4 SV=1;tr|A0A287AW59|A0A287AW59_PIG TIA1	11	2	20.8	15.847	144	0.48147	0.3052	3	0	0	0	55598	48936	40360	0	0	0	0	0	0	0	0	0
D6NHN5	Thyroid peroxidase transcript variant 3	tr|D6NHN5|D6NHN5_PIG Thyroid peroxidase transcript variant 3 OS=Sus scrofa OX=9823 GN=TPO PE=2 SV=1;tr|A0A286ZYA2|A0A286ZYA2_PIG Thyroid peroxidase OS=Sus scrofa OX=9823 GN=TPO PE=3 SV=2;tr|D6NHN4|D6NHN4_PIG Thyroid peroxidase OS=Sus scrofa OX=9823 GN=TPO	4	1	1.9	69.852	633	0.49924	0.28901	1	0	0	0	0	0	0	0	0	0	0	0	0	179300	73318	41991
F1SV47	Thyroid hormone receptor associated protein 3	tr|F1SV47|F1SV47_PIG Thyroid hormone receptor associated protein 3 OS=Sus scrofa OX=9823 GN=THRAP3 PE=1 SV=4;tr|A0A287A2Y0|A0A287A2Y0_PIG Thyroid hormone receptor associated protein 3 OS=Sus scrofa OX=9823 GN=THRAP3 PE=1 SV=1;tr|A0A5K1VE26|A0A5K1VE26_PIG T	4	7	7.5	104.03	914	0.0022883	7.9526	27	131690	83622	43304	187700	405660	515920	343630	554970	215310	365500	258700	311060	0	0	0
A0A480Q663	Thyroid hormone receptor alpha isoform 1	tr|A0A480Q663|A0A480Q663_PIG Thyroid hormone receptor alpha isoform 1 OS=Sus scrofa OX=9823 PE=3 SV=1;tr|A0A287B1A5|A0A287B1A5_PIG Thyroid hormone receptor beta OS=Sus scrofa OX=9823 GN=THRB PE=3 SV=1;tr|A0A287AWP5|A0A287AWP5_PIG Thyroid hormone receptor b	13	1	4.4	46.799	410	0.66444	0.016608	1	0	0	0	78106	98077	106580	0	0	0	0	0	0	0	0	0
Q95274	Thymosin beta-4	sp|Q95274|TYB4_PIG Thymosin beta-4 OS=Sus scrofa OX=9823 GN=TMSB4 PE=3 SV=3;tr|B3XXC3|B3XXC3_PIG Thymosin beta OS=Sus scrofa OX=9823 GN=TMSB4X PE=3 SV=1;tr|A0A4X1SYF0|A0A4X1SYF0_PIG Thymosin beta OS=Sus scrofa OX=9823 GN=LOC110257905 PE=3 SV=1;tr|A0A286ZVG	5	3	75	5.0526	44	0.0019881	4.9413	55	636310	1234200	941930	1357900	1228000	1276200	2884100	4557600	2899800	365270	549098	331390	816560	1416630	1073300
P21753	Thymosin beta-10	sp|P21753|TYB10_PIG Thymosin beta-10 OS=Sus scrofa OX=9823 GN=TMSB10 PE=1 SV=2;tr|A0A5S6G4N7|A0A5S6G4N7_PIG Thymosin beta-10 OS=Sus scrofa OX=9823 GN=TMSB10 PE=3 SV=1	4	5	76.2	4.8234	42	0	31.234	124	2660200	4795700	5796200	3319800	3992000	1006800	3098600	4979800	1995200	902980	1574865	1418020	4129900	1708100	4223300
F1RYF1	Thymosin beta	tr|F1RYF1|F1RYF1_PIG Thymosin beta OS=Sus scrofa OX=9823 GN=TMSB15B PE=3 SV=2;tr|A0A4X1W6J3|A0A4X1W6J3_PIG Thymosin beta OS=Sus scrofa OX=9823 GN=TMSB15B PE=3 SV=1	2	2	73.3	5.2278	45	0.40725	0.39368	3	0	0	0	303773	205710	122193	244580	365940	210530	0	0	0	0	0	0
A0A286ZVR8	Thymocyte selection associated high mobility group box	tr|A0A286ZVR8|A0A286ZVR8_PIG Thymocyte selection associated high mobility group box OS=Sus scrofa OX=9823 GN=TOX PE=4 SV=2;tr|A0A4X1SM25|A0A4X1SM25_PIG HMG box domain-containing protein OS=Sus scrofa OX=9823 GN=TOX PE=4 SV=1;tr|A0A4X1SM68|A0A4X1SM68_PIG HM	11	1	1.7	51.823	477	0.29399	0.56251	1	0	0	0	0	0	0	20679	31681	10337	0	0	0	0	0	0
I3LCT2	Thymocyte selection associated	tr|I3LCT2|I3LCT2_PIG Thymocyte selection associated OS=Sus scrofa OX=9823 GN=THEMIS PE=3 SV=3;tr|A0A4X1U776|A0A4X1U776_PIG Uncharacterized protein OS=Sus scrofa OX=9823 PE=3 SV=1;tr|A0A287BFR8|A0A287BFR8_PIG Thymocyte selection associated OS=Sus scrofa OX=	3	1	1.5	68.846	605	0.54531	0.24085	1	0	0	0	21487	25503	41297	0	0	0	0	0	0	0	0	0
A0A287AC23	Thymocyte expressed, positive selection associated 1	tr|A0A287AC23|A0A287AC23_PIG Thymocyte expressed, positive selection associated 1 OS=Sus scrofa OX=9823 GN=TESPA1 PE=4 SV=1;tr|A0A4X1W9Y8|A0A4X1W9Y8_PIG KRAP_IP3R_bind domain-containing protein OS=Sus scrofa OX=9823 PE=4 SV=1;tr|A0A4X1W4B4|A0A4X1W4B4_PIG K	8	1	2.5	58.475	518	0.63504	0.12033	1	0	0	0	45000	41040	67040	0	0	0	0	0	0	0	0	0
A0A5G2R480	Thymidylate synthase	tr|A0A5G2R480|A0A5G2R480_PIG Thymidylate synthase OS=Sus scrofa OX=9823 GN=TYMS PE=1 SV=1;tr|A0A4X1VPD1|A0A4X1VPD1_PIG Thymidylate synthase OS=Sus scrofa OX=9823 PE=3 SV=1;tr|A0A4X1VQ71|A0A4X1VQ71_PIG Thymidylate synthase OS=Sus scrofa OX=9823 PE=3 SV=1;tr	6	2	7.9	40.31	366	0.32944	0.49148	5	0	0	0	77616	68565	86656	61290	87079	15700	0	0	0	0	0	0
A0A480IVS0	Thymic stromal cotransporter homolog	tr|A0A480IVS0|A0A480IVS0_PIG Thymic stromal cotransporter homolog OS=Sus scrofa OX=9823 PE=4 SV=1	1	1	4.4	19.87	181	0.66052	0.029007	1	0	0	0	41493	10156	29506	0	0	0	0	0	0	0	0	0
I3LLD6	THUMP domain containing 1	tr|I3LLD6|I3LLD6_PIG THUMP domain containing 1 OS=Sus scrofa OX=9823 GN=THUMPD1 PE=1 SV=1;tr|A0A4X1VGL0|A0A4X1VGL0_PIG THUMP domain-containing protein OS=Sus scrofa OX=9823 GN=THUMPD1 PE=4 SV=1;tr|A0A5G2QZ03|A0A5G2QZ03_PIG THUMP domain containing 1 OS=Sus	4	2	8.1	40.012	359	0.2932	0.56143	2	0	0	0	43920	219870	38923	0	0	0	47327	35085	64874	0	0	0
A0A480LI66	Thrombospondin-3 isoform X5	tr|A0A480LI66|A0A480LI66_PIG Thrombospondin-3 isoform X5 OS=Sus scrofa OX=9823 PE=3 SV=1	1	1	2.7	59.608	554	0.45062	0.3418	1	320560	403753	91027	0	0	0	0	0	0	0	0	0	0	0	0
A0A287AD97	Thrombospondin type 1 domain containing 1	tr|A0A287AD97|A0A287AD97_PIG Thrombospondin type 1 domain containing 1 OS=Sus scrofa OX=9823 GN=THSD1 PE=4 SV=1;tr|A0A287B9M5|A0A287B9M5_PIG Thrombospondin type 1 domain containing 1 OS=Sus scrofa OX=9823 GN=THSD1 PE=4 SV=1;tr|A0A4X1SQE4|A0A4X1SQE4_PIG Unc	8	3	5.9	80.616	743	0.075336	1.0431	4	148010	120365	14395	545420	685943	418200	924200	1045100	505420	906550	1072100	1477900	0	0	0
P42706	Thrombopoietin (Fragment)	sp|P42706|TPO_PIG Thrombopoietin (Fragment) OS=Sus scrofa OX=9823 GN=THPO PE=1 SV=1	1	2	53.8	2.9044	26	0.30211	0.54919	2	0	0	0	543150	35943	435769	36307	27902	19063	0	0	0	0	0	0
A0A480YQ78	Threonyl-tRNA synthetase	tr|A0A480YQ78|A0A480YQ78_PIG Threonyl-tRNA synthetase OS=Sus scrofa OX=9823 PE=3 SV=1;tr|A0A480YI80|A0A480YI80_PIG Threonyl-tRNA synthetase OS=Sus scrofa OX=9823 PE=3 SV=1	2	1	1.5	74.861	666	0.26794	0.61092	0	0	0	0	0	0	0	91609	74822	22769	0	0	0	0	0	0
A0A480X842	THO complex subunit 4	tr|A0A480X842|A0A480X842_PIG THO complex subunit 4 OS=Sus scrofa OX=9823 PE=4 SV=1	1	4	16	22.522	213	0.45882	0.33028	1	0	0	0	978300	82103	12505	0	0	0	0	0	0	0	0	0
A0A287B5X2	THO complex subunit 2	tr|A0A287B5X2|A0A287B5X2_PIG THO complex subunit 2 OS=Sus scrofa OX=9823 GN=THOC2 PE=1 SV=2;tr|A0A4X1W7B4|A0A4X1W7B4_PIG THO complex subunit 2 OS=Sus scrofa OX=9823 GN=THOC2 PE=3 SV=1;tr|A0A287BC48|A0A287BC48_PIG THO complex subunit 2 OS=Sus scrofa OX=9823	13	4	3.6	180.18	1572	0.13459	0.82129	4	112090	3448	45211	22260	25530	41530	0	0	0	167740	61980	194370	0	0	0
I3LJ88	Thiosulfate sulfurtransferase like domain containing 2	tr|I3LJ88|I3LJ88_PIG Thiosulfate sulfurtransferase like domain containing 2 OS=Sus scrofa OX=9823 GN=TSTD2 PE=4 SV=3;tr|A0A4X1UGI1|A0A4X1UGI1_PIG Rhodanese domain-containing protein OS=Sus scrofa OX=9823 GN=TSTD2 PE=4 SV=1;tr|A0A287BNX7|A0A287BNX7_PIG Thio	3	1	2.5	58.875	523	0.5764	0.20916	1	0	0	0	0	0	0	108250	417720	143860	0	0	0	0	0	0
A0A5G2QDB8	Thioredoxin-disulfide reductase	tr|A0A5G2QDB8|A0A5G2QDB8_PIG Thioredoxin-disulfide reductase OS=Sus scrofa OX=9823 GN=TXNRD1 PE=1 SV=1;tr|Q8HZQ4|Q8HZQ4_PIG Thioredoxin-disulfide reductase (Fragment) OS=Sus scrofa OX=9823 GN=TrxR1 PE=2 SV=1;tr|A0A4X1T8Q2|A0A4X1T8Q2_PIG Thioredoxin-disulfi	14	2	7.8	49.915	451	0.082109	1.0093	2	0	0	0	220950	3266	3162.2	69396	62656	50527	0	0	0	0	0	0
A0A5G2QW70	Thioredoxin related transmembrane protein 4	tr|A0A5G2QW70|A0A5G2QW70_PIG Thioredoxin related transmembrane protein 4 OS=Sus scrofa OX=9823 GN=TMX4 PE=1 SV=1;tr|A0A286ZIT3|A0A286ZIT3_PIG Thioredoxin related transmembrane protein 4 OS=Sus scrofa OX=9823 GN=TMX4 PE=1 SV=1;tr|A0A5G2QHB4|A0A5G2QHB4_PIG T	6	1	3.3	36.906	332	0.5472	0.2392	1	0	0	0	0	0	0	0	0	0	0	0	0	4578000	5998000	824380
A0A5G2RCW8	Thioredoxin reductase 2	tr|A0A5G2RCW8|A0A5G2RCW8_PIG Thioredoxin reductase 2 OS=Sus scrofa OX=9823 GN=TXNRD2 PE=1 SV=1;tr|A0A4X1URM2|A0A4X1URM2_PIG Uncharacterized protein OS=Sus scrofa OX=9823 PE=3 SV=1;tr|A0A5G2R434|A0A5G2R434_PIG Thioredoxin-disulfide reductase OS=Sus scrofa O	13	2	6.3	63.54	586	0.11261	0.89907	2	259010	323310	52047	0	0	0	0	0	0	0	0	0	0	0	0
A0A5G2QQH2	Thioredoxin domain-containing protein 17	tr|A0A5G2QQH2|A0A5G2QQH2_PIG Thioredoxin domain-containing protein 17 OS=Sus scrofa OX=9823 GN=TXNDC17 PE=1 SV=1;tr|A0A4X1UNC8|A0A4X1UNC8_PIG Thioredoxin domain-containing protein 17 OS=Sus scrofa OX=9823 GN=TXNDC17 PE=4 SV=1;tr|A0A286ZZM7|A0A286ZZM7_PIG T	3	2	41.2	9.1413	80	0.051485	1.1987	5	133540	108590	304790	81504	83176	47760	86744	126740	42140	0	0	0	0	0	0
F1S6G4	Thioredoxin domain-containing protein 12	tr|F1S6G4|F1S6G4_PIG Thioredoxin domain-containing protein 12 OS=Sus scrofa OX=9823 GN=TXNDC12 PE=1 SV=4;tr|A0A4X1WAN2|A0A4X1WAN2_PIG Thioredoxin domain-containing protein 12 OS=Sus scrofa OX=9823 GN=TXNDC12 PE=4 SV=1;tr|A0A481A893|A0A481A893_PIG Thioredox	4	4	28.8	17.869	160	0.026846	1.4597	9	74587	92673	413870	166850	141500	282270	139020	145540	195320	262080	113160	219090	0	0	0
A0A4X1WBH4	Thioredoxin domain-containing protein	tr|A0A4X1WBH4|A0A4X1WBH4_PIG Thioredoxin domain-containing protein OS=Sus scrofa OX=9823 PE=3 SV=1;tr|F1S3U9|F1S3U9_PIG Peroxiredoxin-1 OS=Sus scrofa OX=9823 GN=PRDX1 PE=1 SV=3;tr|A0A4X1WA21|A0A4X1WA21_PIG Thioredoxin domain-containing protein OS=Sus scrof	7	8	33.8	22.147	198	0.0025707	11.687	110	1360700	1081000	897987	2232000	2998400	1917300	2051500	2240000	1745300	1311900	1389000	1796058	1947540	1927800	1392732
A0A4X1VCM0	Thioredoxin domain-containing protein	tr|A0A4X1VCM0|A0A4X1VCM0_PIG Thioredoxin domain-containing protein OS=Sus scrofa OX=9823 GN=PRDX4 PE=4 SV=1;tr|A0A4X1V920|A0A4X1V920_PIG Thioredoxin domain-containing protein OS=Sus scrofa OX=9823 GN=PRDX4 PE=4 SV=1;tr|K7GLN4|K7GLN4_PIG Peroxiredoxin 4 OS=	7	3	17	29.871	264	0	28.403	19	500750	327565	560465	214910	408210	519400	276930	105370	226780	637220	985800	541300	321280	401020	564890
A0A287ARZ1	Thioredoxin domain containing 5	tr|A0A287ARZ1|A0A287ARZ1_PIG Thioredoxin domain containing 5 OS=Sus scrofa OX=9823 GN=TXNDC5 PE=1 SV=2;tr|A0A4X1SHE8|A0A4X1SHE8_PIG Uncharacterized protein OS=Sus scrofa OX=9823 PE=4 SV=1	2	6	18.3	47.14	431	0.0018553	4.025	57	692900	426090	896056	186040	172270	454530	208990	319120	375590	268510	385670	654690	130130	220150	158719
A0A5S6I2J5	Thioredoxin	tr|A0A5S6I2J5|A0A5S6I2J5_PIG Thioredoxin OS=Sus scrofa OX=9823 GN=TXN PE=4 SV=1;tr|A0A4X1VA90|A0A4X1VA90_PIG Thioredoxin domain-containing protein OS=Sus scrofa OX=9823 PE=4 SV=1;sp|P82460|THIO_PIG Thioredoxin OS=Sus scrofa OX=9823 GN=TXN PE=1 SV=3;tr|H6TB	10	5	56.5	9.557	85	0.003003	17.38	29	127630	34695	56977	456390	225750	318500	328870	327850	316660	250380	171570	285290	0	0	0
A0A4X1UBS1	THAP domain-containing protein 1	tr|A0A4X1UBS1|A0A4X1UBS1_PIG THAP domain-containing protein 1 OS=Sus scrofa OX=9823 GN=THAP1 PE=3 SV=1;tr|A0A286ZUK2|A0A286ZUK2_PIG THAP domain-containing protein 1 OS=Sus scrofa OX=9823 GN=THAP1 PE=3 SV=1	2	1	4.8	24.474	210	0.58621	0.20073	1	0	0	0	0	0	0	0	0	0	0	0	0	142730	60341	22525
F1S2K4	THAP domain containing 11	tr|F1S2K4|F1S2K4_PIG THAP domain containing 11 OS=Sus scrofa OX=9823 GN=THAP11 PE=1 SV=1;tr|A0A4X1UDN8|A0A4X1UDN8_PIG THAP-type domain-containing protein OS=Sus scrofa OX=9823 GN=THAP11 PE=4 SV=1	2	1	2.6	33.572	309	0.64016	0.10509	1	0	0	0	65864	10932	25652	0	0	0	0	0	0	0	0	0
A0A4X1UB85	TGS domain-containing protein	tr|A0A4X1UB85|A0A4X1UB85_PIG TGS domain-containing protein OS=Sus scrofa OX=9823 PE=4 SV=1	1	1	3.6	38.783	337	0.39906	0.40374	1	0	0	0	65562	89374	24271	0	0	0	0	0	0	0	0	0
A0A4X1V635	TGc domain-containing protein	tr|A0A4X1V635|A0A4X1V635_PIG TGc domain-containing protein OS=Sus scrofa OX=9823 GN=EPB42 PE=3 SV=1;tr|A0A287BJX0|A0A287BJX0_PIG Erythrocyte membrane protein band 4.2 OS=Sus scrofa OX=9823 GN=EPB42 PE=1 SV=1;tr|A0A5G2R6Y3|A0A5G2R6Y3_PIG Erythrocyte membran	8	2	3	67.48	607	0.078671	1.0187	1	80391	68223	66705	0	0	0	24600	50049	22277	196590	114150	251420	0	0	0
M1KDZ0	TFAP2C protein (Fragment)	tr|M1KDZ0|M1KDZ0_PIG TFAP2C protein (Fragment) OS=Sus scrofa OX=9823 GN=TFAP2C PE=2 SV=1	1	1	14.1	7.6279	71	0.28676	0.57895	1	0	0	0	0	0	0	0	0	0	0	0	0	176390	70977	40782
A0A5G2QN77	Tetratricopeptide repeat, ankyrin repeat and coiled-coil containing 2	tr|A0A5G2QN77|A0A5G2QN77_PIG Tetratricopeptide repeat, ankyrin repeat and coiled-coil containing 2 OS=Sus scrofa OX=9823 GN=TANC2 PE=4 SV=1;tr|F1RRV1|F1RRV1_PIG Tetratricopeptide repeat, ankyrin repeat and coiled-coil containing 2 OS=Sus scrofa OX=9823 GN=	7	3	1.6	220.71	1999	0.10386	0.91591	2	0	0	0	1911200	230273	21037	29520	97701	158420	0	0	0	21294	77235	40746
A0A481CEI5	Tetratricopeptide repeat protein 8 isoform D	tr|A0A481CEI5|A0A481CEI5_PIG Tetratricopeptide repeat protein 8 isoform D OS=Sus scrofa OX=9823 PE=4 SV=1;tr|A0A5G2R3M3|A0A5G2R3M3_PIG Tetratricopeptide repeat domain 8 OS=Sus scrofa OX=9823 GN=TTC8 PE=4 SV=1;tr|A0A4X1SX42|A0A4X1SX42_PIG TPR_REGION domain-	10	1	7.7	23.062	207	0.51352	0.27251	1	0	0	0	0	0	0	0	0	0	97777	88922	324710	0	0	0
A0A480JG69	Tetratricopeptide repeat protein 7B isoform X2	tr|A0A480JG69|A0A480JG69_PIG Tetratricopeptide repeat protein 7B isoform X2 OS=Sus scrofa OX=9823 PE=4 SV=1	1	1	1.7	78.404	696	0.18954	0.67252	1	0	0	0	0	0	0	0	0	0	180350	91778	92786	0	0	0
A0A480ZPI4	Tetratricopeptide repeat protein 5	tr|A0A480ZPI4|A0A480ZPI4_PIG Tetratricopeptide repeat protein 5 OS=Sus scrofa OX=9823 PE=4 SV=1	1	1	2.5	40.569	364	0.24709	0.63435	1	0	0	0	0	0	0	177050	150210	140590	0	0	0	0	0	0
A0A4X1WB70	Tetratricopeptide repeat protein 39B	tr|A0A4X1WB70|A0A4X1WB70_PIG Tetratricopeptide repeat protein 39B OS=Sus scrofa OX=9823 PE=3 SV=1	1	1	2.1	64.358	561	0.35159	0.453	1	0	0	0	0	0	0	0	0	0	0	0	0	185660	75535	44191
A0A480WCA2	Tetratricopeptide repeat protein 12 isoform 2	tr|A0A480WCA2|A0A480WCA2_PIG Tetratricopeptide repeat protein 12 isoform 2 OS=Sus scrofa OX=9823 PE=4 SV=1;tr|A0A4X1T7L8|A0A4X1T7L8_PIG TPR_REGION domain-containing protein OS=Sus scrofa OX=9823 GN=TTC12 PE=4 SV=1;tr|A0A4X1T992|A0A4X1T992_PIG TPR_REGION do	13	1	2.8	67.932	607	0.63961	0.10524	1	0	0	0	0	0	0	0	0	0	925930	468780	656600	0	0	0
A0A287B1J5	Tetratricopeptide repeat domain 31	tr|A0A287B1J5|A0A287B1J5_PIG Tetratricopeptide repeat domain 31 OS=Sus scrofa OX=9823 GN=TTC31 PE=4 SV=2;tr|A0A4X1W6U8|A0A4X1W6U8_PIG TPR_REGION domain-containing protein OS=Sus scrofa OX=9823 PE=4 SV=1;tr|A0A481C052|A0A481C052_PIG Tetratricopeptide repeat	7	1	2.6	54.175	494	0.65037	0.077388	1	56101	101730	28955	0	0	0	0	0	0	0	0	0	0	0	0
A0A287AQJ3	Tetratricopeptide repeat domain 29	tr|A0A287AQJ3|A0A287AQJ3_PIG Tetratricopeptide repeat domain 29 OS=Sus scrofa OX=9823 GN=TTC29 PE=4 SV=1;tr|A0A4X1SGB6|A0A4X1SGB6_PIG Uncharacterized protein OS=Sus scrofa OX=9823 GN=TTC29 PE=4 SV=1;tr|A0A4X1SH05|A0A4X1SH05_PIG Uncharacterized protein OS=S	3	1	2.8	53.634	467	0.52972	0.25773	1	67584	104280	154780	0	0	0	0	0	0	0	0	0	0	0	0
I3LJS9	Tetratricopeptide repeat domain 28	tr|I3LJS9|I3LJS9_PIG Tetratricopeptide repeat domain 28 OS=Sus scrofa OX=9823 GN=TTC28 PE=4 SV=3;tr|A0A4X1VBT9|A0A4X1VBT9_PIG TPR_REGION domain-containing protein OS=Sus scrofa OX=9823 PE=4 SV=1;tr|A0A4X1VGQ8|A0A4X1VGQ8_PIG TPR_REGION domain-containing pro	14	3	1.6	270.34	2478	0.18658	0.69109	4	0	0	0	10230	85951	9304.2	513320	56992	33833	0	0	0	0	0	0
A0A0B8RZZ1	Tetratricopeptide repeat domain 13	tr|A0A0B8RZZ1|A0A0B8RZZ1_PIG Tetratricopeptide repeat domain 13 OS=Sus scrofa domesticus OX=9825 GN=TTC13 PE=4 SV=1;tr|A0A4X1UC25|A0A4X1UC25_PIG TPR_REGION domain-containing protein OS=Sus scrofa OX=9823 GN=TTC13 PE=4 SV=1;tr|A0A287B6F7|A0A287B6F7_PIG Tetr	15	1	1.4	78.91	691	0.53413	0.25137	1	0	0	0	57035	8586.7	8947.7	0	0	0	0	0	0	0	0	0
A0A5G2R628	Tetratricopeptide repeat and ankyrin repeat containing 1	tr|A0A5G2R628|A0A5G2R628_PIG Tetratricopeptide repeat and ankyrin repeat containing 1 OS=Sus scrofa OX=9823 GN=TRANK1 PE=4 SV=1;tr|A0A4X1U2A6|A0A4X1U2A6_PIG Uncharacterized protein OS=Sus scrofa OX=9823 PE=4 SV=1;tr|A0A4X1TX05|A0A4X1TX05_PIG Uncharacterize	5	1	1.1	181.34	1603	0.65853	0.050228	1	0	0	0	963860	79374	12466	0	0	0	0	0	0	0	0	0
A0A287B8X2	Tetraspanin	tr|A0A287B8X2|A0A287B8X2_PIG Tetraspanin OS=Sus scrofa OX=9823 GN=TSPAN10 PE=3 SV=1;tr|A0A4X1U7N7|A0A4X1U7N7_PIG Tetraspanin OS=Sus scrofa OX=9823 PE=3 SV=1;tr|A0A480RQV6|A0A480RQV6_PIG Tetraspanin OS=Sus scrofa OX=9823 PE=3 SV=1	3	2	6.1	40.65	391	0.33493	0.48242	2	53404	53760	144856	0	0	0	37156	72027	67019	48656	35450	68504	1349000	536720	668020
I3L7T3	Testis-specific serine kinase 3	tr|I3L7T3|I3L7T3_PIG Testis-specific serine kinase 3 OS=Sus scrofa OX=9823 GN=TSSK3 PE=2 SV=1;tr|A0A4X1VZB9|A0A4X1VZB9_PIG Protein kinase domain-containing protein OS=Sus scrofa OX=9823 GN=TSSK3 PE=4 SV=1	2	1	10.1	30.108	268	0.65663	0.061803	1	0	0	0	0	0	0	0	0	0	1184700	999440	1375200	0	0	0
A0A287BGJ2	Testis specific 10	tr|A0A287BGJ2|A0A287BGJ2_PIG Testis specific 10 OS=Sus scrofa OX=9823 GN=TSGA10 PE=4 SV=1;tr|A0A4X1W4H9|A0A4X1W4H9_PIG Uncharacterized protein OS=Sus scrofa OX=9823 GN=TSGA10 PE=4 SV=1;tr|A0A287APC6|A0A287APC6_PIG Testis specific 10 OS=Sus scrofa OX=9823 G	6	1	2.1	76.873	660	0.40312	0.39749	1	102835	350320	223945	0	0	0	0	0	0	0	0	0	0	0	0
F1SPN6	Testis expressed 49	tr|F1SPN6|F1SPN6_PIG Testis expressed 49 OS=Sus scrofa OX=9823 GN=TEX49 PE=4 SV=3	1	1	8.9	14.467	124	0.41872	0.38319	1	0	0	0	285540	13635	31599	0	0	0	0	0	0	0	0	0
Q8HY61	Testis enhanced gene transcript (Fragment)	tr|Q8HY61|Q8HY61_PIG Testis enhanced gene transcript (Fragment) OS=Sus scrofa OX=9823 GN=TEGT PE=2 SV=1	1	1	63.2	2.3058	19	0.26324	0.62043	0	0	0	0	0	0	0	0	0	0	0	0	0	36688	106880	94241
A0A5G2RFJ9	Terminal nucleotidyltransferase 4A	tr|A0A5G2RFJ9|A0A5G2RFJ9_PIG Terminal nucleotidyltransferase 4A OS=Sus scrofa OX=9823 GN=TENT4A PE=4 SV=1;tr|A0A4X1TNB9|A0A4X1TNB9_PIG Uncharacterized protein OS=Sus scrofa OX=9823 GN=TENT4A PE=4 SV=1	2	1	2.2	59.684	541	0.55401	0.22738	1	0	0	0	329960	17771	8117.2	0	0	0	0	0	0	0	0	0
A0A480HPY3	Tensin-2	tr|A0A480HPY3|A0A480HPY3_PIG Tensin-2 OS=Sus scrofa OX=9823 PE=3 SV=1;tr|A0A480NE75|A0A480NE75_PIG Tensin-2 isoform 3 (Fragment) OS=Sus scrofa OX=9823 PE=4 SV=1;tr|A0A480QI46|A0A480QI46_PIG Tensin-2 isoform 2 OS=Sus scrofa OX=9823 PE=4 SV=1;tr|A0A480W924|A	24	2	1.8	150.67	1392	0.059869	1.1133	2	0	0	0	0	0	0	162610	117060	74086	0	0	0	628770	195940	266330
A0A287AVF2	Tenascin	tr|A0A287AVF2|A0A287AVF2_PIG Tenascin OS=Sus scrofa OX=9823 GN=TNC PE=1 SV=1;tr|I3LUI4|I3LUI4_PIG Tenascin OS=Sus scrofa OX=9823 GN=TNC PE=1 SV=3;tr|A0A4X1V065|A0A4X1V065_PIG Tenascin OS=Sus scrofa OX=9823 GN=TNC PE=3 SV=1;tr|A0A287BQB6|A0A287BQB6_PIG Tena	22	4	2.1	264.47	2420	0.0030488	18.407	6	71347	72029	76625	0	0	0	99049	52964	38448	0	0	0	0	0	0
A0A4X1SW33	Telomeric repeat-binding factor 2-interacting protein 1	tr|A0A4X1SW33|A0A4X1SW33_PIG Telomeric repeat-binding factor 2-interacting protein 1 OS=Sus scrofa OX=9823 PE=3 SV=1;tr|A0A287AL18|A0A287AL18_PIG Telomeric repeat-binding factor 2-interacting protein 1 OS=Sus scrofa OX=9823 GN=TERF2IP PE=1 SV=2;tr|F1S459|F	4	1	3.2	40.938	372	0.53336	0.25583	3	0	0	0	105620	184930	149720	62932	62120	95700	85749	100220	138465	0	0	0
A0A480UM61	Telomeric repeat-binding factor 2	tr|A0A480UM61|A0A480UM61_PIG Telomeric repeat-binding factor 2 OS=Sus scrofa OX=9823 PE=4 SV=1;tr|A0A4X1SFT9|A0A4X1SFT9_PIG Telomeric repeat-binding factor OS=Sus scrofa OX=9823 PE=4 SV=1;tr|F1S2L2|F1S2L2_PIG Telomeric repeat-binding factor 2 OS=Sus scrofa	4	1	4.5	51.456	470	0.3487	0.45676	1	0	0	0	0	0	0	0	0	0	31399	16584	113650	0	0	0
A0A480VWK0	Telomeric repeat-binding factor 1 isoform X2	tr|A0A480VWK0|A0A480VWK0_PIG Telomeric repeat-binding factor 1 isoform X2 OS=Sus scrofa OX=9823 PE=4 SV=1;tr|A0A480VR27|A0A480VR27_PIG Telomeric repeat-binding factor 1 isoform X1 OS=Sus scrofa OX=9823 PE=4 SV=1;tr|A0A480TSW0|A0A480TSW0_PIG Telomeric repea	9	2	6.8	34.987	309	0.30439	0.54634	2	70058	26405	9031.1	49544	86849	106390	0	0	0	0	0	0	0	0	0
F1RWI3	Telomeric repeat-binding factor	tr|F1RWI3|F1RWI3_PIG Telomeric repeat-binding factor OS=Sus scrofa OX=9823 GN=TERF1 PE=4 SV=3;tr|A0A4X1UP77|A0A4X1UP77_PIG Telomeric repeat-binding factor OS=Sus scrofa OX=9823 GN=TERF1 PE=4 SV=1	2	2	5.7	46.669	407	0.61684	0.1487	1	0	0	0	0	0	0	67094	179990	52519	0	0	0	0	0	0
A0A480ZI04	Telomere-associated protein RIF1 isoform 2	tr|A0A480ZI04|A0A480ZI04_PIG Telomere-associated protein RIF1 isoform 2 OS=Sus scrofa OX=9823 PE=4 SV=1;tr|A0A480ICY1|A0A480ICY1_PIG Telomere-associated protein RIF1 isoform 2 OS=Sus scrofa OX=9823 PE=4 SV=1	2	1	0.7	255.17	2285	0.13679	0.81955	5	0	0	0	745160	908800	897370	799800	826330	861020	518100	612730	622680	0	0	0
A0A481BXP7	Telomerase reverse transcriptase	tr|A0A481BXP7|A0A481BXP7_PIG Telomerase reverse transcriptase OS=Sus scrofa OX=9823 PE=3 SV=1	1	1	0.6	121.22	1088	0.078222	1.0363	0	0	0	0	0	0	0	0	0	0	81850	60380	132940	0	0	0
A0A480RZP9	Telomerase protein component 1 isoform 1-like	tr|A0A480RZP9|A0A480RZP9_PIG Telomerase protein component 1 isoform 1-like OS=Sus scrofa OX=9823 PE=4 SV=1	1	1	1.7	99.09	918	0.10623	0.90841	1	0	0	0	0	0	0	0	0	0	0	0	0	156760	65593	30863
A0A480X1M7	Telomerase Cajal body protein 1	tr|A0A480X1M7|A0A480X1M7_PIG Telomerase Cajal body protein 1 OS=Sus scrofa OX=9823 PE=4 SV=1;tr|A0A4X1V1X0|A0A4X1V1X0_PIG WD_REPEATS_REGION domain-containing protein OS=Sus scrofa OX=9823 GN=WRAP53 PE=4 SV=1;tr|A0A287B6M4|A0A287B6M4_PIG WD_REPEATS_REGION d	5	1	2.1	52.651	484	0.5388	0.24501	1	0	0	0	0	0	0	0	0	0	0	0	0	126540	66825	41815
F1RX77	TELO2 interacting protein 2	tr|F1RX77|F1RX77_PIG TELO2 interacting protein 2 OS=Sus scrofa OX=9823 GN=TTI2 PE=4 SV=3;tr|A0A4X1VWE1|A0A4X1VWE1_PIG Uncharacterized protein OS=Sus scrofa OX=9823 PE=4 SV=1;tr|A0A481CH28|A0A481CH28_PIG TELO2-interacting protein 2 isoform 1 OS=Sus scrofa O	6	1	2.9	53.013	476	0.321	0.50934	1	0	0	0	237260	7893.3	16269	0	0	0	0	0	0	0	0	0
A0A5G2QGT8	Tektin	tr|A0A5G2QGT8|A0A5G2QGT8_PIG Tektin OS=Sus scrofa OX=9823 GN=LOC110259951 PE=3 SV=1;tr|I6QM90|I6QM90_PIG Tektin OS=Sus scrofa OX=9823 GN=Tekt4 PE=2 SV=1;tr|A0A4X1SYW5|A0A4X1SYW5_PIG Tektin OS=Sus scrofa OX=9823 GN=LOC110259951 PE=3 SV=1;tr|A0A287A3S5|A0A28	4	1	2.5	50.579	439	0.5662	0.21455	1	0	0	0	16887	19844	50267	589500	494870	109220	0	0	0	0	0	0
A0A480RU63	Tectonin beta-propeller repeat-containing protein 1	tr|A0A480RU63|A0A480RU63_PIG Tectonin beta-propeller repeat-containing protein 1 OS=Sus scrofa OX=9823 PE=3 SV=1;tr|A0A480NEM0|A0A480NEM0_PIG Tectonin beta-propeller repeat-containing protein 1 OS=Sus scrofa OX=9823 PE=3 SV=1;tr|A0A287B8J1|A0A287B8J1_PIG T	6	2	2.5	113.63	1023	0.50425	0.28444	3	0	0	0	149340	178560	754710	0	0	0	164930	133610	210530	133510	74709	132840
A0A5G2QMY7	TEA domain transcription factor 1	tr|A0A5G2QMY7|A0A5G2QMY7_PIG TEA domain transcription factor 1 OS=Sus scrofa OX=9823 GN=TEAD1 PE=4 SV=1;tr|A0A286ZS62|A0A286ZS62_PIG TEA domain transcription factor 1 OS=Sus scrofa OX=9823 GN=TEAD1 PE=4 SV=1;tr|A0A5G2QTI1|A0A5G2QTI1_PIG TEA domain transcri	6	1	2.2	64.247	584	0.37114	0.43277	1	0	0	0	0	0	0	0	0	0	0	0	0	204750	885440	865850
A0A480PI21	TBP-associated factor 8	tr|A0A480PI21|A0A480PI21_PIG TBP-associated factor 8 OS=Sus scrofa OX=9823 PE=3 SV=1;tr|A0A5G2QYT8|A0A5G2QYT8_PIG TBP-associated factor 8 OS=Sus scrofa OX=9823 GN=TAF8 PE=3 SV=1;tr|A0A4X1SHM7|A0A4X1SHM7_PIG TBP-associated factor 8 OS=Sus scrofa OX=9823 PE=	10	2	14.6	26.198	239	0.31601	0.52086	2	0	0	0	0	0	0	3518200	1880800	722040	0	0	0	0	0	0
A0A4X1VNC0	TBD domain-containing protein	tr|A0A4X1VNC0|A0A4X1VNC0_PIG TBD domain-containing protein OS=Sus scrofa OX=9823 GN=TANK PE=4 SV=1;tr|A0A4X1VJ74|A0A4X1VJ74_PIG UBZ1-type domain-containing protein OS=Sus scrofa OX=9823 GN=TANK PE=4 SV=1	2	1	2.5	44.911	400	0.32556	0.49974	1	0	0	0	421720	24383	18155	0	0	0	0	0	0	0	0	0
A0A4X1SH66	TBCC domain-containing protein 1	tr|A0A4X1SH66|A0A4X1SH66_PIG TBCC domain-containing protein 1 OS=Sus scrofa OX=9823 PE=3 SV=1	1	1	4.5	45.531	404	0.58628	0.19864	1	0	0	0	0	0	0	0	0	0	393310	402840	520560	0	0	0
A0A480QVK9	TBC1 domain family member 8B isoform a	tr|A0A480QVK9|A0A480QVK9_PIG TBC1 domain family member 8B isoform a OS=Sus scrofa OX=9823 PE=4 SV=1;tr|K7GLS0|K7GLS0_PIG TBC1 domain family member 8B OS=Sus scrofa OX=9823 GN=TBC1D8B PE=4 SV=2;tr|A0A4X1W6L8|A0A4X1W6L8_PIG Uncharacterized protein OS=Sus scr	3	1	1.3	72.418	632	0.25818	0.62996	0	23574	27776	9307.1	0	0	0	0	0	0	0	0	0	0	0	0
A0A480YPC9	TBC1 domain family member 8 isoform 2	tr|A0A480YPC9|A0A480YPC9_PIG TBC1 domain family member 8 isoform 2 OS=Sus scrofa OX=9823 PE=4 SV=1;tr|A0A480LSV0|A0A480LSV0_PIG TBC1 domain family member 8 isoform 2 OS=Sus scrofa OX=9823 PE=4 SV=1;tr|F1STG0|F1STG0_PIG TBC1 domain family member 8 OS=Sus sc	5	1	1	119.97	1042	0.56051	0.22103	1	2749	55189	207232	0	0	0	0	0	0	0	0	0	0	0	0
A0A480QHD0	TBC1 domain family member 10B	tr|A0A480QHD0|A0A480QHD0_PIG TBC1 domain family member 10B OS=Sus scrofa OX=9823 PE=4 SV=1;tr|A0A480L569|A0A480L569_PIG TBC1 domain family member 10B OS=Sus scrofa OX=9823 PE=4 SV=1;tr|A0A4X1TX42|A0A4X1TX42_PIG Rab-GAP TBC domain-containing protein OS=Sus	4	1	1.6	86.441	799	0.62247	0.14233	1	0	0	0	0	0	0	108640	163350	200160	0	0	0	0	0	0
A0A480M0X9	TBC1 domain family member 1 isoform X14	tr|A0A480M0X9|A0A480M0X9_PIG TBC1 domain family member 1 isoform X14 OS=Sus scrofa OX=9823 PE=4 SV=1	1	1	1.5	124.74	1111	0.52267	0.26628	1	0	0	0	0	0	0	0	0	0	107390	111820	374400	0	0	0
A0A286ZTU8	Taxilin alpha	tr|A0A286ZTU8|A0A286ZTU8_PIG Taxilin alpha OS=Sus scrofa OX=9823 GN=TXLNA PE=3 SV=2;tr|A0A4X1VYQ9|A0A4X1VYQ9_PIG Uncharacterized protein OS=Sus scrofa OX=9823 GN=TXLNA PE=3 SV=1;tr|A0A0B8RT16|A0A0B8RT16_PIG Taxilin alpha OS=Sus scrofa domesticus OX=9825 GN	5	1	1.6	61.738	547	0.11556	0.87675	0	144880	138880	663410	0	0	0	0	0	0	0	0	0	0	0	0
I3LFP6	TATA-box binding protein associated factor 9b	tr|I3LFP6|I3LFP6_PIG TATA-box binding protein associated factor 9b OS=Sus scrofa OX=9823 GN=TAF9B PE=3 SV=2;tr|A0A4X1VWY8|A0A4X1VWY8_PIG Uncharacterized protein OS=Sus scrofa OX=9823 GN=TAF9B PE=3 SV=1;tr|A0A4X1W2B3|A0A4X1W2B3_PIG Uncharacterized protein O	8	1	4.4	27.56	251	0.46071	0.32592	1	0	0	0	0	0	0	0	0	0	0	0	0	489870	159440	190620
A0A287BI89	TATA-box binding protein associated factor 6	tr|A0A287BI89|A0A287BI89_PIG TATA-box binding protein associated factor 6 OS=Sus scrofa OX=9823 GN=TAF6 PE=3 SV=2;tr|A0A4X1U8Z3|A0A4X1U8Z3_PIG TAF domain-containing protein OS=Sus scrofa OX=9823 GN=TAF6 PE=3 SV=1	2	1	2.2	71.285	646	0.51232	0.27292	1	0	0	0	0	0	0	0	0	0	170150	84730	201450	0	0	0
A0A287BH34	TATA-box binding protein associated factor 4b	tr|A0A287BH34|A0A287BH34_PIG TATA-box binding protein associated factor 4b OS=Sus scrofa OX=9823 GN=TAF4B PE=3 SV=1;tr|A0A5G2Q9F4|A0A5G2Q9F4_PIG TATA-box binding protein associated factor 4b OS=Sus scrofa OX=9823 GN=TAF4B PE=3 SV=1;tr|A2I7K8|A2I7K8_PIG TAT	6	1	1.1	85.87	822	0.54619	0.24005	2	0	0	0	1305600	1786954	2390500	0	0	0	1576500	2051700	1372000	0	0	0
I3LSM9	TATA-box binding protein associated factor 4	tr|I3LSM9|I3LSM9_PIG TATA-box binding protein associated factor 4 OS=Sus scrofa OX=9823 GN=TAF4 PE=3 SV=3	1	3	4	105.28	1031	0.66035	0.042156	1	0	0	0	0	0	0	0	0	0	65449	56523	112690	0	0	0
A0A5G2QE48	TATA-box binding protein associated factor 13	tr|A0A5G2QE48|A0A5G2QE48_PIG TATA-box binding protein associated factor 13 OS=Sus scrofa OX=9823 GN=TAF13 PE=4 SV=1;tr|A0A5G2QFS1|A0A5G2QFS1_PIG TATA-box binding protein associated factor 13 OS=Sus scrofa OX=9823 GN=TAF13 PE=4 SV=1	2	1	10.1	14.901	129	0.66057	0.028727	1	0	0	0	0	0	0	51354	102330	218050	0	0	0	0	0	0
A0A480RQ36	TATA element modulatory factor	tr|A0A480RQ36|A0A480RQ36_PIG TATA element modulatory factor OS=Sus scrofa OX=9823 PE=4 SV=1;tr|A0A480QKF6|A0A480QKF6_PIG TATA element modulatory factor OS=Sus scrofa OX=9823 PE=4 SV=1;tr|A0A4X1VBH7|A0A4X1VBH7_PIG TMF_TATA_bd domain-containing protein OS=Su	8	1	1	101.2	903	0.43065	0.36851	1	0	0	0	0	0	0	0	0	0	0	0	0	71801	36219	37567
I3LRL0	TATA box-binding protein-like 1	tr|I3LRL0|I3LRL0_PIG TATA box-binding protein-like 1 OS=Sus scrofa OX=9823 GN=TBPL1 PE=1 SV=3	1	1	3.9	23.676	206	0.56883	0.21336	1	0	0	0	0	0	0	0	0	0	0	0	0	20974	76200	39181
Q00P22	TATA box binding protein (Fragment)	tr|Q00P22|Q00P22_PIG TATA box binding protein (Fragment) OS=Sus scrofa OX=9823 GN=TBP PE=2 SV=1	1	1	26.8	4.7055	41	0.57793	0.20704	1	53025	97098	65118	0	0	0	0	0	0	0	0	0	0	0	0
I3LNA4	TAR DNA-binding protein 43	tr|I3LNA4|I3LNA4_PIG TAR DNA-binding protein 43 OS=Sus scrofa OX=9823 GN=TARDBP PE=1 SV=2;tr|A0A4X1W8J3|A0A4X1W8J3_PIG TAR DNA-binding protein 43 OS=Sus scrofa OX=9823 PE=4 SV=1;tr|A0A287B8N6|A0A287B8N6_PIG TAR DNA-binding protein 43 OS=Sus scrofa OX=9823	5	5	13	44.578	414	0.0045455	2.5264	13	97922	64528	90097	85470	88852	66990	85398	50922	69638	0	0	0	81075	99846	41066
A0A5G2RB57	TAO kinase 1	tr|A0A5G2RB57|A0A5G2RB57_PIG TAO kinase 1 OS=Sus scrofa OX=9823 GN=TAOK1 PE=4 SV=1;tr|F1RN84|F1RN84_PIG Serine/threonine-protein kinase TAO1 isoform 1 OS=Sus scrofa OX=9823 GN=TAOK1 PE=4 SV=3;tr|A0A4X1TUA5|A0A4X1TUA5_PIG Protein kinase domain-containing pr	3	1	1.2	109.59	939	0.6112	0.16584	1	1940375	3499600	2456685	0	0	0	0	0	0	0	0	0	0	0	0
A0A4X1TR06	Tantalus domain-containing protein	tr|A0A4X1TR06|A0A4X1TR06_PIG Tantalus domain-containing protein OS=Sus scrofa OX=9823 GN=PRR14 PE=4 SV=1;tr|A0A287ADY8|A0A287ADY8_PIG Proline rich 14 OS=Sus scrofa OX=9823 GN=PRR14 PE=4 SV=1	2	1	2	64.796	586	0.18142	0.71148	0	102140	1203753	128360	50904	117090	166220	0	0	0	0	0	0	0	0	0
A0A287ACN0	Tankyrase_bdg_C domain-containing protein	tr|A0A287ACN0|A0A287ACN0_PIG Tankyrase_bdg_C domain-containing protein OS=Sus scrofa OX=9823 GN=KIAA1671 PE=4 SV=2	1	1	1.6	54.436	492	0.64841	0.094795	1	0	0	0	0	0	0	0	0	0	0	0	0	5411.1	57409	29417
F1SFZ8	Talin-1	tr|F1SFZ8|F1SFZ8_PIG Talin-1 OS=Sus scrofa OX=9823 GN=TLN1 PE=2 SV=3;tr|A0A481CZZ1|A0A481CZZ1_PIG Talin-1 OS=Sus scrofa OX=9823 PE=4 SV=1;tr|A0A480QBY4|A0A480QBY4_PIG Talin-1 OS=Sus scrofa OX=9823 PE=4 SV=1;tr|A0A480KC92|A0A480KC92_PIG Talin-1 OS=Sus scrof	16	19	14.6	269.83	2541	0	150.55	77	557360	780930	640640	230180	144450	192590	132890	163495	199084	37326	11475	45756	86656	50912	33939
A0A4X1UXD9	TAFH domain-containing protein	tr|A0A4X1UXD9|A0A4X1UXD9_PIG TAFH domain-containing protein OS=Sus scrofa OX=9823 PE=3 SV=1	2	3	6	77.534	721	0.18521	0.68782	3	0	0	0	151170	7465.7	6323.2	0	0	0	404780	188310	187380	0	0	0
A0A4X1T6N3	Tafazzin family protein	tr|A0A4X1T6N3|A0A4X1T6N3_PIG Tafazzin family protein OS=Sus scrofa OX=9823 GN=TAZ PE=3 SV=1;tr|A0A480PEU1|A0A480PEU1_PIG Tafazzin family protein OS=Sus scrofa OX=9823 GN=TAZ PE=3 SV=1;tr|A0A0B8RZZ7|A0A0B8RZZ7_PIG Tafazzin family protein OS=Sus scrofa domes	5	1	4.2	30.117	262	0.6564	0.061058	1	0	0	0	0	0	0	0	0	0	570440	556290	779940	0	0	0
A0A4X1VK30	TAF domain-containing protein	tr|A0A4X1VK30|A0A4X1VK30_PIG TAF domain-containing protein OS=Sus scrofa OX=9823 PE=3 SV=1;tr|A0A4X1VKF4|A0A4X1VKF4_PIG TAF domain-containing protein OS=Sus scrofa OX=9823 PE=3 SV=1;tr|A0A480PKY2|A0A480PKY2_PIG TAF6-like RNA polymerase II p300/CBP-associat	4	2	4	62.712	576	0.19628	0.64957	2	0	0	0	0	0	0	0	0	0	0	0	0	55996	105140	90110
A0A287AK30	TACC_C domain-containing protein	tr|A0A287AK30|A0A287AK30_PIG TACC_C domain-containing protein OS=Sus scrofa OX=9823 GN=TACC1 PE=3 SV=1	1	1	3.1	29.636	259	0.19323	0.66253	1	0	0	0	0	0	0	0	0	0	0	0	0	154750	64315	29717
A0A5G2QTQ2	t-SNARE domain containing 1	tr|A0A5G2QTQ2|A0A5G2QTQ2_PIG t-SNARE domain containing 1 OS=Sus scrofa OX=9823 GN=TSNARE1 PE=4 SV=1;tr|A0A5G2RGS1|A0A5G2RGS1_PIG t-SNARE domain containing 1 OS=Sus scrofa OX=9823 GN=TSNARE1 PE=4 SV=1;tr|A0A5G2QZ39|A0A5G2QZ39_PIG t-SNARE domain containing 1	3	1	2.9	63.539	585	0.61328	0.16325	1	0	0	0	23334	37968	61093	0	0	0	0	0	0	0	0	0
A0A4X1VQQ8	t-SNARE coiled-coil homology domain-containing protein	tr|A0A4X1VQQ8|A0A4X1VQQ8_PIG t-SNARE coiled-coil homology domain-containing protein OS=Sus scrofa OX=9823 GN=STX11 PE=3 SV=1	1	1	4.8	36.421	312	0.43516	0.35914	1	20420	61844	6854.3	0	0	0	110580	180030	98467	0	0	0	0	0	0
A0A481D8E5	T-lymphoma invasion and metastasis-inducing protein 1 isoform 4	tr|A0A481D8E5|A0A481D8E5_PIG T-lymphoma invasion and metastasis-inducing protein 1 isoform 4 OS=Sus scrofa OX=9823 PE=4 SV=1;tr|A0A287B313|A0A287B313_PIG TIAM Rac1 associated GEF 1 OS=Sus scrofa OX=9823 GN=TIAM1 PE=4 SV=1;tr|A0A287ASL2|A0A287ASL2_PIG TIAM	8	1	1.5	92.663	821	0.6508	0.081542	1	0	0	0	0	0	0	0	0	0	0	0	0	89459	411670	371180
A0A480PLI7	T-complex protein 1 subunit zeta isoform a	tr|A0A480PLI7|A0A480PLI7_PIG T-complex protein 1 subunit zeta isoform a OS=Sus scrofa OX=9823 PE=3 SV=1;tr|A0A5G2QHR6|A0A5G2QHR6_PIG Uncharacterized protein OS=Sus scrofa OX=9823 GN=CCT6A PE=1 SV=1;tr|A0A4X1T1R3|A0A4X1T1R3_PIG Uncharacterized protein OS=Su	13	11	29.5	54.693	499	0.0030211	17.529	99	344390	226390	280596	329890	355290	879760	235990	227010	135970	221010	184380	275030	173880	183300	181331
A0A4X1VT61	T-complex protein 1 subunit gamma	tr|A0A4X1VT61|A0A4X1VT61_PIG T-complex protein 1 subunit gamma OS=Sus scrofa OX=9823 GN=CCT3 PE=3 SV=1;tr|A0A287AMZ2|A0A287AMZ2_PIG T-complex protein 1 subunit gamma OS=Sus scrofa OX=9823 GN=CCT3 PE=1 SV=1;tr|A0A4X1VYZ0|A0A4X1VYZ0_PIG CCT-gamma OS=Sus scro	12	10	26.6	60.653	545	0	22.703	114	267650	494490	328564	768070	671410	973200	639890	531910	523660	253840	337030	158290	246512	128960	195800
D0G0C9	T-complex protein 1 subunit eta	tr|D0G0C9|D0G0C9_PIG T-complex protein 1 subunit eta OS=Sus scrofa OX=9823 GN=CCT7 PE=1 SV=1;tr|A0A4X1W7V3|A0A4X1W7V3_PIG T-complex protein 1 subunit eta OS=Sus scrofa OX=9823 GN=CCT7 PE=3 SV=1;tr|A0A480IMF8|A0A480IMF8_PIG T-complex protein 1 subunit eta O	13	13	34.4	59.473	543	0.0021598	6.4919	53	133920	54749	48894	654090	731620	526300	440600	126230	348395	198117	167418	227530	41509	46462	96600
F1SQN1	T-complex protein 1 subunit delta	tr|F1SQN1|F1SQN1_PIG T-complex protein 1 subunit delta OS=Sus scrofa OX=9823 GN=CCT4 PE=1 SV=1;tr|A0A4X1WBL9|A0A4X1WBL9_PIG T-complex protein 1 subunit delta OS=Sus scrofa OX=9823 GN=CCT4 PE=3 SV=1;tr|A0A5G2QN54|A0A5G2QN54_PIG T-complex protein 1 subunit d	4	12	39.7	58.056	539	0	64.917	60	194056	349430	329404	554470	407330	710390	357450	329740	438594	209390	162107	486705	0	0	0
D5KJJ0	T-complex 11-like protein (Fragment)	tr|D5KJJ0|D5KJJ0_PIG T-complex 11-like protein (Fragment) OS=Sus scrofa OX=9823 GN=TCP11 PE=3 SV=1;tr|A0A5G2QC67|A0A5G2QC67_PIG T-complex 11 OS=Sus scrofa OX=9823 GN=TCP11 PE=3 SV=1;tr|A0A4X1T3K9|A0A4X1T3K9_PIG Uncharacterized protein OS=Sus scrofa OX=9823	5	1	9.1	10.788	99	0.65972	0.037098	1	0	0	0	65456	88715	19636	0	0	0	0	0	0	0	0	0
F1RPQ4	T-box brain transcription factor 1	tr|F1RPQ4|F1RPQ4_PIG T-box brain transcription factor 1 OS=Sus scrofa OX=9823 GN=TBR1 PE=4 SV=2;tr|A0A4X1VN91|A0A4X1VN91_PIG T-box_assoc domain-containing protein OS=Sus scrofa OX=9823 GN=TBR1 PE=4 SV=1	2	1	1.8	73.964	682	0.16181	0.76786	1	0	0	0	255000	10812	30952	0	0	0	0	0	0	0	0	0
A0A480ZYP8	Syntaxin-binding protein 3	tr|A0A480ZYP8|A0A480ZYP8_PIG Syntaxin-binding protein 3 OS=Sus scrofa OX=9823 PE=3 SV=1;tr|A0A5G2QIG7|A0A5G2QIG7_PIG Uncharacterized protein OS=Sus scrofa OX=9823 GN=STXBP3 PE=1 SV=1;tr|F1S5Y5|F1S5Y5_PIG Uncharacterized protein OS=Sus scrofa OX=9823 GN=STX	14	1	2	56.244	489	0.50647	0.28218	1	61136	101610	260484	0	0	0	0	0	0	0	0	0	0	0	0
A0A5G2RAG7	Syntaxin-binding protein 2	tr|A0A5G2RAG7|A0A5G2RAG7_PIG Syntaxin-binding protein 2 OS=Sus scrofa OX=9823 GN=STXBP2 PE=1 SV=1;tr|A0A4X1VR55|A0A4X1VR55_PIG Syntaxin-binding protein 2 OS=Sus scrofa OX=9823 GN=STXBP2 PE=3 SV=1;tr|A0A480I0J4|A0A480I0J4_PIG Syntaxin-binding protein 2 isof	11	3	6.3	62.305	557	0.015476	1.6045	6	48576	30532	23923	0	0	0	0	0	0	112320	67278	32507	0	0	0
A0A287AYV6	Syntaxin binding protein 5 like	tr|A0A287AYV6|A0A287AYV6_PIG Syntaxin binding protein 5 like OS=Sus scrofa OX=9823 GN=STXBP5L PE=3 SV=2;tr|A0A287AVH1|A0A287AVH1_PIG Syntaxin binding protein 5 like OS=Sus scrofa OX=9823 GN=STXBP5L PE=3 SV=2;tr|A0A287A5A6|A0A287A5A6_PIG Syntaxin binding pr	13	3	2.8	130.13	1163	0.18636	0.68616	3	0	0	0	0	0	0	203800	206750	178700	2106800	1293000	1346600	274340	162150	123760
A0A287AH59	Syntaxin 3	tr|A0A287AH59|A0A287AH59_PIG Syntaxin 3 OS=Sus scrofa OX=9823 GN=STX3 PE=1 SV=1;tr|A0A4X1VIE3|A0A4X1VIE3_PIG t-SNARE coiled-coil homology domain-containing protein OS=Sus scrofa OX=9823 GN=STX3 PE=4 SV=1;tr|A0A5G2QR75|A0A5G2QR75_PIG Syntaxin 3 OS=Sus scrof	18	1	3.4	30.2	262	0.52342	0.26516	1	0	0	0	349310	18393	11768	0	0	0	0	0	0	0	0	0
A0A5G2QUL3	Syntaxin 1A	tr|A0A5G2QUL3|A0A5G2QUL3_PIG Syntaxin 1A OS=Sus scrofa OX=9823 GN=STX1A PE=4 SV=1;tr|A0A480JZN5|A0A480JZN5_PIG Syntaxin-1A isoform 1 OS=Sus scrofa OX=9823 PE=4 SV=1;tr|A0A5G2QVH0|A0A5G2QVH0_PIG Syntaxin 1A OS=Sus scrofa OX=9823 GN=STX1A PE=1 SV=1;tr|A0A4X1	7	1	6.5	26.884	245	0.43283	0.36616	1	0	0	0	0	0	0	0	0	0	0	0	0	332290	1197400	216740
A0A480VRY6	Synemin isoform A	tr|A0A480VRY6|A0A480VRY6_PIG Synemin isoform A OS=Sus scrofa OX=9823 PE=3 SV=1;tr|A0A4X1UHN0|A0A4X1UHN0_PIG IF rod domain-containing protein OS=Sus scrofa OX=9823 PE=3 SV=1;tr|A0A4X1UKQ2|A0A4X1UKQ2_PIG IF rod domain-containing protein OS=Sus scrofa OX=9823	4	4	4.2	173.64	1561	0.0045732	2.5633	11	0	0	0	0	0	0	0	0	0	0	0	0	882210	793690	416020
A0A5G2QXW6	Syndecan binding protein	tr|A0A5G2QXW6|A0A5G2QXW6_PIG Syndecan binding protein OS=Sus scrofa OX=9823 GN=SDCBP PE=1 SV=1;tr|A0A4X1SP12|A0A4X1SP12_PIG Uncharacterized protein OS=Sus scrofa OX=9823 GN=SDCBP PE=4 SV=1;tr|F1RT83|F1RT83_PIG Syndecan binding protein OS=Sus scrofa OX=9823	7	2	9.4	26.521	244	0.1056	0.91056	13	193780	253770	120573	28937	45533	32952	0	0	0	222250	333600	203256	144869	412350	244797
A0A5G2R9B0	Syndecan	tr|A0A5G2R9B0|A0A5G2R9B0_PIG Syndecan OS=Sus scrofa OX=9823 GN=SDC2 PE=1 SV=1;tr|A0A5G2QQ46|A0A5G2QQ46_PIG Syndecan OS=Sus scrofa OX=9823 GN=SDC2 PE=1 SV=1;tr|A0A4X1U1Q5|A0A4X1U1Q5_PIG Syndecan OS=Sus scrofa OX=9823 PE=3 SV=1;tr|M3V822|M3V822_PIG Syndecan	6	1	9	18.584	166	0.62309	0.14175	1	0	0	0	0	0	0	0	0	0	96784	190940	307810	0	0	0
A0A287B4H0	Syncoilin, intermediate filament protein	tr|A0A287B4H0|A0A287B4H0_PIG Syncoilin, intermediate filament protein OS=Sus scrofa OX=9823 GN=SYNC PE=4 SV=1	1	1	4.7	56.39	491	0.57981	0.20615	1	26956	82164	32839	0	0	0	0	0	0	0	0	0	0	0	0
A0A480DIX3	Synaptotagmin-16 isoform X2	tr|A0A480DIX3|A0A480DIX3_PIG Synaptotagmin-16 isoform X2 OS=Sus scrofa OX=9823 PE=4 SV=1	1	1	6	59.496	535	0.37637	0.42701	1	850484	1000400	711034	0	0	0	0	0	0	0	0	0	0	0	0
F1SBR7	Synaptotagmin 6	tr|F1SBR7|F1SBR7_PIG Synaptotagmin 6 OS=Sus scrofa OX=9823 GN=SYT6 PE=4 SV=3;tr|A0A4X1T0R4|A0A4X1T0R4_PIG Uncharacterized protein OS=Sus scrofa OX=9823 GN=SYT6 PE=4 SV=1;tr|A0A4X1SYB3|A0A4X1SYB3_PIG Uncharacterized protein OS=Sus scrofa OX=9823 GN=SYT6 PE=	4	1	1.9	59.02	527	0.27959	0.59175	2	0	0	0	0	0	0	218740	245480	114090	0	0	0	0	0	0
A0A287AXY6	Synaptosome associated protein 29	tr|A0A287AXY6|A0A287AXY6_PIG Synaptosome associated protein 29 OS=Sus scrofa OX=9823 GN=SNAP29 PE=1 SV=1;tr|F1RKY1|F1RKY1_PIG Synaptosome associated protein 29 OS=Sus scrofa OX=9823 GN=SNAP29 PE=1 SV=1;tr|A0A4X1UXK3|A0A4X1UXK3_PIG t-SNARE coiled-coil homol	5	3	19.6	25.232	225	0.38528	0.41852	3	0	0	0	108010	55367	210375	74549	47933	28496	73330	76448	150550	0	0	0
A0A287ACF3	Synaptopodin 2 like	tr|A0A287ACF3|A0A287ACF3_PIG Synaptopodin 2 like OS=Sus scrofa OX=9823 GN=SYNPO2L PE=4 SV=1	1	1	1.8	84.683	812	0.64878	0.090915	1	53775	78065	28594	0	0	0	0	0	0	0	0	0	0	0	0
A0A287AXS3	Synaptophysin like 2	tr|A0A287AXS3|A0A287AXS3_PIG Synaptophysin like 2 OS=Sus scrofa OX=9823 GN=SYPL2 PE=1 SV=2;tr|F1S5Z8|F1S5Z8_PIG Synaptophysin like 2 OS=Sus scrofa OX=9823 GN=SYPL2 PE=1 SV=2;tr|A0A4X1TF57|A0A4X1TF57_PIG MARVEL domain-containing protein OS=Sus scrofa OX=982	3	1	4.4	30.154	272	0.53324	0.25583	2	127900	101770	155130	0	0	0	1208100	1746300	1954902	0	0	0	0	0	0
A0A5G2QVK4	Synaptogyrin	tr|A0A5G2QVK4|A0A5G2QVK4_PIG Synaptogyrin OS=Sus scrofa OX=9823 GN=SYNGR2 PE=3 SV=1;tr|M3UZ93|M3UZ93_PIG Synaptogyrin OS=Sus scrofa OX=9823 GN=SYNGR2 PE=2 SV=1;tr|A0A4X1UQJ6|A0A4X1UQJ6_PIG Synaptogyrin OS=Sus scrofa OX=9823 GN=SYNGR2 PE=3 SV=1;tr|A0A287ACY	4	2	11.1	24.931	226	0.31923	0.51421	2	63085	204990	33265	428250	25235	24223	0	0	0	0	0	0	94456	442790	396080
I3L9V2	Synaptic vesicle membrane protein VAT-1 homolog	tr|I3L9V2|I3L9V2_PIG Synaptic vesicle membrane protein VAT-1 homolog OS=Sus scrofa OX=9823 GN=VAT1 PE=1 SV=1;tr|A0A4X1TWX8|A0A4X1TWX8_PIG PKS_ER domain-containing protein OS=Sus scrofa OX=9823 GN=VAT1 PE=4 SV=1;tr|A0A5G2QWN0|A0A5G2QWN0_PIG Vesicle amine tr	4	8	31.5	42.687	400	0	24.847	40	269930	778870	248770	407520	174570	472480	1172000	524250	761680	447540	499550	292732	669220	1049600	1259600
A0A5G2Q796	Synapsin II	tr|A0A5G2Q796|A0A5G2Q796_PIG Synapsin II OS=Sus scrofa OX=9823 GN=SYN2 PE=1 SV=1;tr|A0A480W9E4|A0A480W9E4_PIG Synapsin-2 isoform IIb OS=Sus scrofa OX=9823 PE=3 SV=1;tr|A0A5G2QAY3|A0A5G2QAY3_PIG Synapsin II OS=Sus scrofa OX=9823 GN=SYN2 PE=1 SV=1;tr|A0A4X1U	5	1	4.1	52.606	482	0.54935	0.23531	1	172440	144330	776960	0	0	0	0	0	0	0	0	0	0	0	0
F1SEW6	Synapse defective Rho GTPase homolog 2	tr|F1SEW6|F1SEW6_PIG Synapse defective Rho GTPase homolog 2 OS=Sus scrofa OX=9823 GN=SYDE2 PE=4 SV=4;tr|A0A4X1UF43|A0A4X1UF43_PIG Rho-GAP domain-containing protein OS=Sus scrofa OX=9823 GN=SYDE2 PE=4 SV=1	2	1	0.9	131	1190	0.19721	0.64495	1	0	0	0	0	0	0	0	0	0	69586	64292	121990	0	0	0
A0A5G2QVQ9	Switching B cell complex subunit SWAP70	tr|A0A5G2QVQ9|A0A5G2QVQ9_PIG Switching B cell complex subunit SWAP70 OS=Sus scrofa OX=9823 GN=SWAP70 PE=1 SV=1;tr|A0A4X1TWA6|A0A4X1TWA6_PIG PH domain-containing protein OS=Sus scrofa OX=9823 GN=SWAP70 PE=4 SV=1;tr|F1S6V0|F1S6V0_PIG Switching B cell complex	6	1	3.2	61.889	527	0.54623	0.24027	1	162940	458945	77817	0	0	0	0	0	0	0	0	0	0	0	0
A0A287BDB9	SWI/SNF related, matrix associated, actin dependent regulator of chromatin, subfamily b, member 1	tr|A0A287BDB9|A0A287BDB9_PIG SWI/SNF related, matrix associated, actin dependent regulator of chromatin, subfamily b, member 1 OS=Sus scrofa OX=9823 GN=SMARCB1 PE=1 SV=1;tr|A0A4X1V171|A0A4X1V171_PIG Uncharacterized protein OS=Sus scrofa OX=9823 GN=SMARCB1	5	1	3.6	37.706	329	0.19945	0.63872	1	0	0	0	0	0	0	20355	31595	10010	0	0	0	0	0	0
A0A5G2RH57	SWI/SNF related, matrix associated, actin dependent regulator of chromatin, subfamily a, member 4	tr|A0A5G2RH57|A0A5G2RH57_PIG SWI/SNF related, matrix associated, actin dependent regulator of chromatin, subfamily a, member 4 OS=Sus scrofa OX=9823 GN=SMARCA4 PE=1 SV=1;tr|A0A4X1VJ39|A0A4X1VJ39_PIG Uncharacterized protein OS=Sus scrofa OX=9823 GN=SMARCA4	14	1	0.9	177.47	1575	0.5576	0.22321	1	11403	39665	20364	0	0	0	0	0	0	0	0	0	0	0	0
F1S1M3	Sushi repeat-containing protein SRPX2	tr|F1S1M3|F1S1M3_PIG Sushi repeat-containing protein SRPX2 OS=Sus scrofa OX=9823 GN=SRPX2 PE=4 SV=1;tr|A0A4X1W4A0|A0A4X1W4A0_PIG Sushi repeat-containing protein SRPX2 OS=Sus scrofa OX=9823 GN=SRPX2 PE=4 SV=1	2	1	2.8	52.916	465	0.55774	0.22347	1	165894	143150	776895	0	0	0	0	0	0	0	0	0	0	0	0
A0A480X761	Survival motor neuron protein isoform d	tr|A0A480X761|A0A480X761_PIG Survival motor neuron protein isoform d OS=Sus scrofa OX=9823 PE=4 SV=1	1	1	3.4	32.183	293	0.66468	0.012736	1	0	0	0	0	0	0	0	0	0	276010	124030	228770	0	0	0
A0A287B433	Surfeit 6	tr|A0A287B433|A0A287B433_PIG Surfeit 6 OS=Sus scrofa OX=9823 GN=SURF6 PE=3 SV=2;tr|A0A4X1SZR9|A0A4X1SZR9_PIG SURF6 domain-containing protein OS=Sus scrofa OX=9823 PE=3 SV=1	2	1	3.4	35.661	321	0.61001	0.17011	1	0	0	0	0	0	0	0	0	0	428700	428910	564120	0	0	0
A0A287B663	Suppressor of SWI4 1 homolog isoform 1	tr|A0A287B663|A0A287B663_PIG Suppressor of SWI4 1 homolog isoform 1 OS=Sus scrofa OX=9823 PE=4 SV=1;tr|F1S3I2|F1S3I2_PIG Suppressor of SWI4 1 homolog isoform 1 OS=Sus scrofa OX=9823 GN=PPAN PE=4 SV=1;tr|A0A4X1UXW0|A0A4X1UXW0_PIG Brix domain-containing prot	4	2	4.1	46.275	412	0.12128	0.85235	1	0	0	0	27656	28680	46386	89341	51846	34487	0	0	0	0	0	0
A0A480Y0B3	Suppressor of fused homolog	tr|A0A480Y0B3|A0A480Y0B3_PIG Suppressor of fused homolog OS=Sus scrofa OX=9823 PE=3 SV=1;tr|A0A4X1TUB8|A0A4X1TUB8_PIG Suppressor of fused homolog OS=Sus scrofa OX=9823 PE=3 SV=1	2	1	2.9	53.628	477	0.5931	0.19138	1	0	0	0	30245	29782	48117	0	0	0	0	0	0	0	0	0
Q153Y9	Suppressor of cytokine signaling 3 (Fragment)	tr|Q153Y9|Q153Y9_PIG Suppressor of cytokine signaling 3 (Fragment) OS=Sus scrofa OX=9823 GN=socs3 PE=2 SV=1;tr|E5EZY0|E5EZY0_PIG Suppressor of cytokine signaling 3 OS=Sus scrofa OX=9823 GN=SOCS3 PE=2 SV=1;tr|B1H0V9|B1H0V9_PIG Suppressor of cytokine signali	3	2	9.4	24.342	223	0.44568	0.34506	2	0	0	0	1794300	209650	20991	1074000	752070	298980	0	0	0	0	0	0
A0A480YZ47	Supervillin isoform 1	tr|A0A480YZ47|A0A480YZ47_PIG Supervillin isoform 1 OS=Sus scrofa OX=9823 PE=3 SV=1;tr|A0A287BHD1|A0A287BHD1_PIG Supervillin OS=Sus scrofa OX=9823 GN=SVIL PE=3 SV=2;tr|A0A4X1UIA3|A0A4X1UIA3_PIG HP domain-containing protein OS=Sus scrofa OX=9823 PE=3 SV=1;tr	11	2	1.9	181.81	1617	0.37103	0.43431	3	0	0	0	56051	275390	64738	0	0	0	0	0	0	35908	103780	92119
P04178	Superoxide dismutase [Cu-Zn]	sp|P04178|SODC_PIG Superoxide dismutase [Cu-Zn] OS=Sus scrofa OX=9823 GN=SOD1 PE=1 SV=2;tr|D9D839|D9D839_PIG Superoxide dismutase [Cu-Zn] OS=Sus scrofa OX=9823 GN=SOD1 PE=2 SV=1;tr|Q95ME5|Q95ME5_PIG Superoxide dismutase 1 (Fragment) OS=Sus scrofa OX=9823 G	6	5	43.1	15.892	153	0.0017483	3.4526	39	38916	212460	104635	1167100	1747240	1895200	680640	1243100	1071700	390580	1055900	685743	179040	329090	181331
A0A5G2RDT4	Superoxide dismutase	tr|A0A5G2RDT4|A0A5G2RDT4_PIG Superoxide dismutase OS=Sus scrofa OX=9823 GN=SOD2 PE=1 SV=1;tr|A0A4X1VUM2|A0A4X1VUM2_PIG Superoxide dismutase OS=Sus scrofa OX=9823 PE=3 SV=1;tr|A0A4X1VUL7|A0A4X1VUL7_PIG Superoxide dismutase OS=Sus scrofa OX=9823 PE=3 SV=1;tr	12	2	17.9	18.199	162	0.33981	0.46984	14	0	0	0	57549	34841	18920	0	0	0	253830	196410	466810	134100	152110	69960
A0A5G2QPG6	SUMO1 activating enzyme subunit 1	tr|A0A5G2QPG6|A0A5G2QPG6_PIG SUMO1 activating enzyme subunit 1 OS=Sus scrofa OX=9823 GN=SAE1 PE=1 SV=1;tr|A0A4X1W312|A0A4X1W312_PIG ThiF domain-containing protein OS=Sus scrofa OX=9823 GN=SAE1 PE=3 SV=1;tr|A0A5G2QMD1|A0A5G2QMD1_PIG SUMO1 activating enzyme	11	2	16.7	28	252	0.0031348	19.706	11	0	0	0	37391	66764	73028	69877	142290	110308	102050	67508	118510	56377	49054	57471
I3LMW0	SUMO specific peptidase 2	tr|I3LMW0|I3LMW0_PIG SUMO specific peptidase 2 OS=Sus scrofa OX=9823 GN=SENP2 PE=3 SV=3;tr|F1SFK1|F1SFK1_PIG SUMO specific peptidase 2 OS=Sus scrofa OX=9823 GN=SENP2 PE=3 SV=3;tr|A0A4X1UD77|A0A4X1UD77_PIG ULP_PROTEASE domain-containing protein OS=Sus scrof	5	1	3.1	63.804	556	0.64802	0.093999	1	0	0	0	219990	3244.8	2213.6	0	0	0	0	0	0	0	0	0
I3L5H4	SUMO peptidase family member, NEDD8 specific	tr|I3L5H4|I3L5H4_PIG SUMO peptidase family member, NEDD8 specific OS=Sus scrofa OX=9823 GN=SENP8 PE=3 SV=2;tr|A0A4X1SVU0|A0A4X1SVU0_PIG ULP_PROTEASE domain-containing protein OS=Sus scrofa OX=9823 GN=SENP8 PE=3 SV=1	2	1	6.6	24.18	212	0.072993	1.0704	2	47484	52452	129394	0	0	0	92105	402510	89375	0	0	0	0	0	0
A0A480KFP8	Sulfurtransferase	tr|A0A480KFP8|A0A480KFP8_PIG Sulfurtransferase OS=Sus scrofa OX=9823 PE=4 SV=1;tr|F1SKL2|F1SKL2_PIG Sulfurtransferase OS=Sus scrofa OX=9823 GN=TST PE=1 SV=2;tr|A0A4X1U9F0|A0A4X1U9F0_PIG Sulfurtransferase OS=Sus scrofa OX=9823 GN=TST PE=4 SV=1;tr|A0A287BPT5	4	1	4.1	33.396	294	0.13993	0.80798	4	0	0	0	50670	14709	10202	37765	39993	55587	0	0	0	0	0	0
A0A5G2RL24	Sulfotransferase	tr|A0A5G2RL24|A0A5G2RL24_PIG Sulfotransferase OS=Sus scrofa OX=9823 GN=LOC100623656 PE=1 SV=1;tr|A0A4X1W1I2|A0A4X1W1I2_PIG Sulfotransferase OS=Sus scrofa OX=9823 PE=3 SV=1;tr|I3LC84|I3LC84_PIG Sulfotransferase OS=Sus scrofa OX=9823 GN=LOC100623656 PE=1 SV=	5	1	5.1	27.687	235	0.63413	0.12075	1	20274344	30181000	34037545	18393	102680	21281	0	0	0	0	0	0	0	0	0
A0A4X1TTM9	Sulfotransfer_1 domain-containing protein	tr|A0A4X1TTM9|A0A4X1TTM9_PIG Sulfotransfer_1 domain-containing protein OS=Sus scrofa OX=9823 GN=DSEL PE=3 SV=1;tr|A0A287AQA5|A0A287AQA5_PIG Dermatan sulfate epimerase like OS=Sus scrofa OX=9823 GN=DSEL PE=3 SV=1	2	1	1.5	138.8	1212	0.56057	0.22074	1	0	0	0	0	0	0	0	0	0	0	0	0	957450	384100	542400
F1S862	Sulfiredoxin	tr|F1S862|F1S862_PIG Sulfiredoxin OS=Sus scrofa OX=9823 GN=SRXN1 PE=3 SV=3	1	1	6.6	14.294	136	0.055344	1.1371	1	1401800	833680	899020	0	0	0	0	0	0	0	0	0	0	0	0
A0A4X1VSZ5	Sulfhydryl oxidase	tr|A0A4X1VSZ5|A0A4X1VSZ5_PIG Sulfhydryl oxidase OS=Sus scrofa OX=9823 PE=4 SV=1;tr|F1RFB9|F1RFB9_PIG Sulfhydryl oxidase OS=Sus scrofa OX=9823 GN=GFER PE=1 SV=2	2	1	3.3	39.876	364	0.47703	0.31015	1	0	0	0	0	0	0	0	0	0	322450	300530	455500	0	0	0
A0A480GQ57	Sulfatase-modifying factor 2 isoform X1	tr|A0A480GQ57|A0A480GQ57_PIG Sulfatase-modifying factor 2 isoform X1 OS=Sus scrofa OX=9823 PE=4 SV=1;tr|A0A480FQR0|A0A480FQR0_PIG Sulfatase-modifying factor 2 isoform X1 OS=Sus scrofa OX=9823 PE=4 SV=1	2	1	5.2	25.886	230	0.383	0.42077	1	119240	12047	54169	0	0	0	0	0	0	0	0	0	0	0	0
A0A4X1UNK0	SUI1 domain-containing protein	tr|A0A4X1UNK0|A0A4X1UNK0_PIG SUI1 domain-containing protein OS=Sus scrofa OX=9823 PE=4 SV=1;tr|F2Z553|F2Z553_PIG Eukaryotic translation initiation factor 1 OS=Sus scrofa OX=9823 GN=EIF1 PE=3 SV=2;tr|A0A5G2QLD8|A0A5G2QLD8_PIG Eukaryotic translation initiati	4	1	46.5	7.9029	71	0.0029499	16.829	7	0	0	0	360410	613250	449305	482290	511710	214920	0	0	0	0	0	0
F1S7W3	Sugar phosphate phosphatase	tr|F1S7W3|F1S7W3_PIG Sugar phosphate phosphatase OS=Sus scrofa OX=9823 GN=ARMT1 PE=1 SV=3;tr|A0A4X1VQN2|A0A4X1VQN2_PIG Sugar phosphate phosphatase OS=Sus scrofa OX=9823 GN=ARMT1 PE=3 SV=1;tr|A0A480TTR6|A0A480TTR6_PIG Sugar phosphate phosphatase OS=Sus scro	4	1	1.6	51.187	443	0.50963	0.27628	1	0	0	0	49501	73861	104400	0	0	0	0	0	0	0	0	0
A0A4X1VHW8	Sucrase-isomaltase, intestinal	tr|A0A4X1VHW8|A0A4X1VHW8_PIG Sucrase-isomaltase, intestinal OS=Sus scrofa OX=9823 GN=SI PE=3 SV=1	1	1	0.7	189.16	1636	0.53551	0.24993	1	0	0	0	0	0	0	115100	134010	553940	0	0	0	0	0	0
A0A5G2RCZ1	Succinyl-CoA:3-ketoacid coenzyme A transferase 1, mitochondrial	tr|A0A5G2RCZ1|A0A5G2RCZ1_PIG Succinyl-CoA:3-ketoacid coenzyme A transferase 1, mitochondrial OS=Sus scrofa OX=9823 GN=OXCT1 PE=1 SV=1;tr|M9MMN4|M9MMN4_PIG Succinyl-CoA:3-ketoacid-coenzyme A transferase OS=Sus scrofa OX=9823 GN=OXCT1 PE=1 SV=3;tr|A0A5S6IB20	7	1	3.3	36.797	334	0.43407	0.36369	3	41843	83905	18403	0	0	0	0	0	0	235650	303230	166950	0	0	0
A0A4X1VCQ3	Succinate--CoA ligase [GDP-forming] subunit beta, mitochondrial	tr|A0A4X1VCQ3|A0A4X1VCQ3_PIG Succinate--CoA ligase [GDP-forming] subunit beta, mitochondrial OS=Sus scrofa OX=9823 GN=SUCLG2 PE=3 SV=1;tr|A0A4X1VC51|A0A4X1VC51_PIG Succinate--CoA ligase [GDP-forming] subunit beta, mitochondrial OS=Sus scrofa OX=9823 GN=SUC	13	4	16.9	46.639	426	0.0045524	2.5295	24	117180	94504	252150	261340	118140	212590	150000	120000	148395	124290	158565	158780	0	0	0
A0A480KG40	Succinate--CoA ligase [ADP/GDP-forming] subunit alpha, mitochondrial	tr|A0A480KG40|A0A480KG40_PIG Succinate--CoA ligase [ADP/GDP-forming] subunit alpha, mitochondrial OS=Sus scrofa OX=9823 GN=SUCLG1 PE=3 SV=1;tr|A0A287B574|A0A287B574_PIG Succinate--CoA ligase [ADP/GDP-forming] subunit alpha, mitochondrial OS=Sus scrofa OX=9	14	4	18.3	34.976	333	0.0027855	14.226	29	215200	123070	289706	217260	137220	383650	135190	134230	174974	149040	126310	235270	152830	92157	113860
O97580	Succinate--CoA ligase [ADP-forming] subunit beta, mitochondrial (Fragment)	sp|O97580|SUCB1_PIG Succinate--CoA ligase [ADP-forming] subunit beta, mitochondrial (Fragment) OS=Sus scrofa OX=9823 GN=SUCLA2 PE=2 SV=1;tr|F1RK10|F1RK10_PIG Succinate--CoA ligase [ADP-forming] subunit beta, mitochondrial OS=Sus scrofa OX=9823 GN=SUCLA2 PE	9	2	4.7	46.258	425	0.057197	1.1338	5	43037	92042	63784	0	0	0	121670	123830	158780	0	0	0	0	0	0
A0A4X1VKF3	Succinate dehydrogenase cytochrome b560 subunit, mitochondrial	tr|A0A4X1VKF3|A0A4X1VKF3_PIG Succinate dehydrogenase cytochrome b560 subunit, mitochondrial OS=Sus scrofa OX=9823 GN=SDHC PE=3 SV=1	1	1	7.1	21.909	197	0.46889	0.31889	1	32089	57606	11133	0	0	0	0	0	0	0	0	0	0	0	0
F1RLD9	Succinate dehydrogenase assembly factor 1, mitochondrial	tr|F1RLD9|F1RLD9_PIG Succinate dehydrogenase assembly factor 1, mitochondrial OS=Sus scrofa OX=9823 PE=4 SV=1;tr|A0A4X1TCK8|A0A4X1TCK8_PIG Uncharacterized protein OS=Sus scrofa OX=9823 GN=SDHAF1 PE=4 SV=1	2	1	6.9	12.936	116	0.55004	0.23322	1	0	0	0	0	0	0	13635	28085	7699.2	0	0	0	0	0	0
Q007T0	Succinate dehydrogenase [ubiquinone] iron-sulfur subunit, mitochondrial	sp|Q007T0|SDHB_PIG Succinate dehydrogenase [ubiquinone] iron-sulfur subunit, mitochondrial OS=Sus scrofa OX=9823 GN=SDHB PE=1 SV=1;tr|I3LDC1|I3LDC1_PIG Succinate dehydrogenase [ubiquinone] iron-sulfur subunit, mitochondrial OS=Sus scrofa OX=9823 GN=SDHB PE	5	3	12.1	31.585	280	0.10364	0.9214	5	75806	24280	58532	209250	329304	291600	137920	93874	103643	203890	148634	285940	0	0	0
A0A5G2QMG3	Succinate dehydrogenase [ubiquinone] flavoprotein subunit, mitochondrial	tr|A0A5G2QMG3|A0A5G2QMG3_PIG Succinate dehydrogenase [ubiquinone] flavoprotein subunit, mitochondrial OS=Sus scrofa OX=9823 GN=SDHA PE=1 SV=1;tr|A0A480U0T9|A0A480U0T9_PIG Succinate dehydrogenase [ubiquinone] flavoprotein subunit, mitochondrial OS=Sus scrof	13	6	16.7	67.423	616	0.0020921	5.9774	63	139960	178040	160483	191410	159380	265930	172700	135540	293037	144390	108120	577170	66232	101750	60196
O18758	Submaxillary apomucin	tr|O18758|O18758_PIG Submaxillary apomucin OS=Sus scrofa domesticus OX=9825 PE=2 SV=1	1	1	0.1	1184.1	13288	0.58611	0.20098	1	0	0	0	0	0	0	0	0	0	244560	108700	204780	0	0	0
A0A5G2QD34	Stum, mechanosensory transduction mediator homolog	tr|A0A5G2QD34|A0A5G2QD34_PIG Stum, mechanosensory transduction mediator homolog OS=Sus scrofa OX=9823 GN=STUM PE=4 SV=1	1	1	7.9	15.416	140	0.65496	0.069211	1	40197	122140	17464	0	0	0	0	0	0	0	0	0	0	0	0
A0A480V5H1	Structure-specific endonuclease subunit SLX1 isoform 1	tr|A0A480V5H1|A0A480V5H1_PIG Structure-specific endonuclease subunit SLX1 isoform 1 OS=Sus scrofa OX=9823 PE=4 SV=1;tr|A0A480VXF3|A0A480VXF3_PIG Structure-specific endonuclease subunit SLX1 OS=Sus scrofa OX=9823 GN=SLX1 PE=3 SV=1;tr|A0A480JX10|A0A480JX10_P	3	2	4.3	22.935	207	0.069853	1.0798	1	0	0	0	0	0	0	73777	166330	23419	0	0	0	251400	94683	74073
A0A5G2R1S8	Structural maintenance of chromosomes flexible hinge domain containing 1	tr|A0A5G2R1S8|A0A5G2R1S8_PIG Structural maintenance of chromosomes flexible hinge domain containing 1 OS=Sus scrofa OX=9823 GN=SMCHD1 PE=1 SV=1;tr|I3LPX9|I3LPX9_PIG Structural maintenance of chromosomes flexible hinge domain containing 1 OS=Sus scrofa OX=9	7	1	1.2	206.08	1827	0.61217	0.16446	1	676006	242190	809800	0	0	0	0	0	0	0	0	0	0	0	0
A0A480V926	Stromal interaction molecule 2 isoform 2 (Fragment)	tr|A0A480V926|A0A480V926_PIG Stromal interaction molecule 2 isoform 2 (Fragment) OS=Sus scrofa OX=9823 PE=4 SV=1	1	1	1.7	94.457	847	0.54999	0.23359	1	44891	71363	16578	0	0	0	0	0	0	0	0	0	0	0	0
A0A480YFR7	Stromal interaction molecule 2 isoform 1	tr|A0A480YFR7|A0A480YFR7_PIG Stromal interaction molecule 2 isoform 1 OS=Sus scrofa OX=9823 PE=4 SV=1	1	1	2.5	80.068	706	0.49733	0.29043	1	0	0	0	0	0	0	0	0	0	4985.7	19951	75881	0	0	0
F1RNB1	Stromal cell-derived factor 2	tr|F1RNB1|F1RNB1_PIG Stromal cell-derived factor 2 OS=Sus scrofa OX=9823 GN=SDF2 PE=1 SV=2;tr|A0A4X1TR05|A0A4X1TR05_PIG Uncharacterized protein OS=Sus scrofa OX=9823 GN=SDF2 PE=4 SV=1	2	1	11.4	23.178	211	0.0034014	3.196	13	0	0	0	117070	93319	165940	158350	203590	145950	181588	139570	198060	404600	229410	565130
A0A5G2QJ14	Stromal antigen 1	tr|A0A5G2QJ14|A0A5G2QJ14_PIG Stromal antigen 1 OS=Sus scrofa OX=9823 GN=STAG1 PE=3 SV=1;tr|A0A4X1TMG7|A0A4X1TMG7_PIG STAG domain-containing protein OS=Sus scrofa OX=9823 GN=STAG1 PE=3 SV=1;tr|A0A5G2QY48|A0A5G2QY48_PIG Stromal antigen 1 OS=Sus scrofa OX=982	12	1	7.8	26.127	232	0.63201	0.1257	1	0	0	0	0	0	0	0	0	0	85436	61353	134930	0	0	0
F1S614	Striatin-interacting protein 1	tr|F1S614|F1S614_PIG Striatin-interacting protein 1 OS=Sus scrofa OX=9823 GN=STRIP1 PE=1 SV=2;tr|A0A4X1TD37|A0A4X1TD37_PIG Uncharacterized protein OS=Sus scrofa OX=9823 GN=STRIP1 PE=3 SV=1	2	1	2	95.637	837	0.045082	1.2506	1	0	0	0	0	0	0	1229500	1637800	2354000	0	0	0	0	0	0
A0A0B8RZ32	Stress-induced phosphoprotein 1	tr|A0A0B8RZ32|A0A0B8RZ32_PIG Stress-induced phosphoprotein 1 OS=Sus scrofa domesticus OX=9825 GN=STIP1 PE=4 SV=1;tr|I3LNG8|I3LNG8_PIG Stress induced phosphoprotein 1 OS=Sus scrofa OX=9823 GN=STIP1 PE=1 SV=2;tr|A0A4X1VGE1|A0A4X1VGE1_PIG Uncharacterized prot	6	8	20.4	62.462	543	0	323.31	63	347840	441920	396057	1898630	1946800	1891800	1029700	1456500	1953000	595840	482170	616700	978480	408380	773250
A0A4X1TLQ2	Stork_head domain-containing protein	tr|A0A4X1TLQ2|A0A4X1TLQ2_PIG Stork_head domain-containing protein OS=Sus scrofa OX=9823 PE=4 SV=1;tr|A0A286ZZH2|A0A286ZZH2_PIG Storkhead box 1 OS=Sus scrofa OX=9823 GN=STOX1 PE=4 SV=1	2	1	1.2	110.32	987	0.36028	0.44522	1	0	0	0	13535	92895	16547	0	0	0	0	0	0	0	0	0
A0A4X1VN69	Store-operated calcium entry-associated regulatory factor	tr|A0A4X1VN69|A0A4X1VN69_PIG Store-operated calcium entry-associated regulatory factor OS=Sus scrofa OX=9823 GN=MBOAT4 PE=3 SV=1;tr|A0A287AGS1|A0A287AGS1_PIG Store-operated calcium entry-associated regulatory factor OS=Sus scrofa OX=9823 GN=SARAF PE=1 SV=1	2	1	2.4	35.804	327	0.64553	0.099089	1	0	0	0	0	0	0	131590	143380	129190	0	0	0	0	0	0
A0A480LIM8	STON1-GTF2A1L protein isoform 2	tr|A0A480LIM8|A0A480LIM8_PIG STON1-GTF2A1L protein isoform 2 OS=Sus scrofa OX=9823 PE=3 SV=1	1	1	1.6	80.007	703	0.59617	0.18688	1	0	0	0	0	0	0	0	0	0	210150	132400	275950	0	0	0
A0A5G2R5I1	Stomatin like 1	tr|A0A5G2R5I1|A0A5G2R5I1_PIG Stomatin like 1 OS=Sus scrofa OX=9823 GN=STOML1 PE=3 SV=1;tr|A0A4X1TI13|A0A4X1TI13_PIG PHB domain-containing protein OS=Sus scrofa OX=9823 PE=3 SV=1;tr|F1SID0|F1SID0_PIG Stomatin like 1 OS=Sus scrofa OX=9823 GN=STOML1 PE=3 SV=3	3	2	5.1	46.043	430	0.33983	0.47115	2	56752	264630	1444100	0	0	0	0	0	0	0	0	0	95728	44179	32597
A0A5G2R6Z7	Stomatin	tr|A0A5G2R6Z7|A0A5G2R6Z7_PIG Stomatin OS=Sus scrofa OX=9823 GN=STOM PE=4 SV=1;tr|A0A4X1UPK8|A0A4X1UPK8_PIG PHB domain-containing protein OS=Sus scrofa OX=9823 GN=STOM PE=4 SV=1;tr|K9J6J2|K9J6J2_PIG Erythrocyte band 7 integral membrane protein isoform a OS=	7	2	26	13.25	123	0.52983	0.25754	3	51643	187590	387800	0	0	0	64285	43375	22430	108430	157580	499600	0	0	0
A0A480LTG2	Sterol regulatory element-binding protein cleavage-activating protein	tr|A0A480LTG2|A0A480LTG2_PIG Sterol regulatory element-binding protein cleavage-activating protein OS=Sus scrofa OX=9823 PE=3 SV=1;tr|A0A287B7I0|A0A287B7I0_PIG Sterol regulatory element-binding protein cleavage-activating protein OS=Sus scrofa OX=9823 PE=3	11	2	2.9	120.95	1098	0.54734	0.23853	3	114230	189675	43659	0	0	0	49656	14490	71230	188350	106950	232500	0	0	0
A0A480SIK2	Sterol regulatory element-binding protein 1 isoform b	tr|A0A480SIK2|A0A480SIK2_PIG Sterol regulatory element-binding protein 1 isoform b OS=Sus scrofa OX=9823 PE=4 SV=1;tr|Q1W3C0|Q1W3C0_PIG Adipocyte determination and differentiation-dependent factor 1 (Fragment) OS=Sus scrofa OX=9823 GN=add1 PE=4 SV=1;tr|A0A	7	2	1.8	113.53	1070	0.443	0.34831	2	69099	717030	43854	0	0	0	0	0	0	21896	70342	94811	0	0	0
A0A480IQ19	Sterol 26-hydroxylase, mitochondrial	tr|A0A480IQ19|A0A480IQ19_PIG Sterol 26-hydroxylase, mitochondrial OS=Sus scrofa OX=9823 PE=3 SV=1;tr|A0A4X1UIJ8|A0A4X1UIJ8_PIG Uncharacterized protein OS=Sus scrofa OX=9823 GN=CYP27A1 PE=3 SV=1;tr|I3LAB7|I3LAB7_PIG Uncharacterized protein OS=Sus scrofa OX=	3	1	2.2	60.634	537	0.65258	0.075408	1	27732	120474	9306.4	0	0	0	0	0	0	0	0	0	0	0	0
K7GPV1	Sterile alpha motif domain containing 4B	tr|K7GPV1|K7GPV1_PIG Sterile alpha motif domain containing 4B OS=Sus scrofa OX=9823 GN=SAMD4B PE=1 SV=3	1	1	1.2	89.941	827	0.43433	0.3637	1	300150	889303	524060	0	0	0	0	0	0	0	0	0	0	0	0
A0A286ZKL4	Sterile alpha motif domain containing 12	tr|A0A286ZKL4|A0A286ZKL4_PIG Sterile alpha motif domain containing 12 OS=Sus scrofa OX=9823 GN=SAMD12 PE=4 SV=2;tr|A0A4X1T9L6|A0A4X1T9L6_PIG SAM domain-containing protein OS=Sus scrofa OX=9823 GN=SAMD12 PE=4 SV=1;tr|A0A480E0B7|A0A480E0B7_PIG Sterile alpha	3	1	5.8	17.718	156	0.52917	0.25791	1	71928	11390	50453	0	0	0	0	0	0	0	0	0	0	0	0
A0A4X1STF6	Stathmin-3	tr|A0A4X1STF6|A0A4X1STF6_PIG Stathmin-3 OS=Sus scrofa OX=9823 PE=3 SV=1;tr|A0A4X1STH8|A0A4X1STH8_PIG Stathmin-3 OS=Sus scrofa OX=9823 PE=3 SV=1	2	1	5.5	29.046	253	0.65953	0.038702	1	0	0	0	0	0	0	40569	84903	162150	0	0	0	0	0	0
Q6DUB7	Stathmin	sp|Q6DUB7|STMN1_PIG Stathmin OS=Sus scrofa OX=9823 GN=STMN1 PE=2 SV=3;tr|A0A5S6HQM6|A0A5S6HQM6_PIG Stathmin OS=Sus scrofa OX=9823 GN=STMN1 PE=1 SV=1	9	9	38.3	17.302	149	0	91.282	302	535860	625850	1446000	1607300	2225200	2128700	11905500	12555400	9526200	11573200	12539200	10411000	17681900	14954800	12467000
A0A4X1T065	STAS domain-containing protein	tr|A0A4X1T065|A0A4X1T065_PIG STAS domain-containing protein OS=Sus scrofa OX=9823 GN=SLC26A6 PE=3 SV=1;tr|F1SKK6|F1SKK6_PIG Solute carrier family 26 member 6 OS=Sus scrofa OX=9823 GN=SLC26A6 PE=1 SV=3;tr|A0A4X1T1R7|A0A4X1T1R7_PIG STAS domain-containing pro	6	1	1.4	79.728	733	0.60729	0.17623	1	0	0	0	0	0	0	63693	162480	21878	0	0	0	0	0	0
A0A4X1USR9	START domain-containing protein	tr|A0A4X1USR9|A0A4X1USR9_PIG START domain-containing protein OS=Sus scrofa OX=9823 GN=STARD10 PE=4 SV=1;tr|A0A480SCG8|A0A480SCG8_PIG START domain-containing protein 10 OS=Sus scrofa OX=9823 PE=4 SV=1;tr|A0A287A5S1|A0A287A5S1_PIG StAR related lipid transfer	3	1	4.1	33.008	291	0.5504	0.2333	1	0	0	0	0	0	0	0	0	0	0	0	0	50296	24876	22926
F1SML4	Staphylococcal nuclease domain-containing protein	tr|F1SML4|F1SML4_PIG Staphylococcal nuclease domain-containing protein OS=Sus scrofa OX=9823 GN=SND1 PE=1 SV=3;tr|A0A5G2QLY5|A0A5G2QLY5_PIG Staphylococcal nuclease domain-containing protein OS=Sus scrofa OX=9823 GN=SND1 PE=1 SV=1;tr|A0A4X1W1R6|A0A4X1W1R6_P	7	9	15.5	100.28	897	0	118.81	86	263540	341000	202754	314460	309500	374570	181250	310150	154943	146900	278741	169380	160600	72687	186500
F1SCY8	STAM binding protein like 1	tr|F1SCY8|F1SCY8_PIG STAM binding protein like 1 OS=Sus scrofa OX=9823 GN=STAMBPL1 PE=3 SV=3;tr|A0A4X1V450|A0A4X1V450_PIG MPN domain-containing protein OS=Sus scrofa OX=9823 GN=STAMBPL1 PE=3 SV=1;tr|A0A4X1V134|A0A4X1V134_PIG MPN domain-containing protein O	6	1	2.7	45.84	404	0.63773	0.10992	1	0	0	0	74854	345930	69282	0	0	0	0	0	0	0	0	0
A0A287AM33	Stabilin 1	tr|A0A287AM33|A0A287AM33_PIG Stabilin 1 OS=Sus scrofa OX=9823 GN=STAB1 PE=4 SV=1;tr|A0A287AS75|A0A287AS75_PIG Stabilin 1 OS=Sus scrofa OX=9823 GN=STAB1 PE=4 SV=1;tr|A0A287ALB0|A0A287ALB0_PIG Stabilin 1 OS=Sus scrofa OX=9823 GN=STAB1 PE=4 SV=1	3	1	0.5	281.96	2634	0.6542	0.067943	1	0	0	0	0	0	0	56568	88241	52783	0	0	0	0	0	0
I3LS82	ST6 N-acetylgalactosaminide alpha-2,6-sialyltransferase 3	tr|I3LS82|I3LS82_PIG ST6 N-acetylgalactosaminide alpha-2,6-sialyltransferase 3 OS=Sus scrofa OX=9823 GN=ST6GALNAC3 PE=3 SV=2;tr|A0A4X1UH41|A0A4X1UH41_PIG Uncharacterized protein OS=Sus scrofa OX=9823 GN=ST6GALNAC3 PE=3 SV=1	2	1	2.6	35.438	305	0.55716	0.22384	1	0	0	0	0	0	0	28624	53310	26086	0	0	0	0	0	0
A0A287BFU7	ST6 N-acetylgalactosaminide alpha-2,6-sialyltransferase 2	tr|A0A287BFU7|A0A287BFU7_PIG ST6 N-acetylgalactosaminide alpha-2,6-sialyltransferase 2 OS=Sus scrofa OX=9823 GN=ST6GALNAC2 PE=3 SV=2;tr|A0A4X1UUC7|A0A4X1UUC7_PIG Uncharacterized protein OS=Sus scrofa OX=9823 GN=ST6GALNAC2 PE=3 SV=1	2	1	1.8	59.361	557	0.53885	0.24475	1	605764	227870	673040	0	0	0	0	0	0	0	0	0	0	0	0
A0A5G2QI80	ST6 N-acetylgalactosaminide alpha-2,6-sialyltransferase 1	tr|A0A5G2QI80|A0A5G2QI80_PIG ST6 N-acetylgalactosaminide alpha-2,6-sialyltransferase 1 OS=Sus scrofa OX=9823 GN=ST6GALNAC1 PE=3 SV=1;tr|F1RZ66|F1RZ66_PIG ST6 N-acetylgalactosaminide alpha-2,6-sialyltransferase 1 OS=Sus scrofa OX=9823 GN=ST6GALNAC1 PE=3 SV=	3	1	2.7	64.428	585	0.53971	0.24405	1	0	0	0	546560	4313200	501834	0	0	0	0	0	0	0	0	0
A0A5G2QSS9	ST3 beta-galactoside alpha-2,3-sialyltransferase 4	tr|A0A5G2QSS9|A0A5G2QSS9_PIG ST3 beta-galactoside alpha-2,3-sialyltransferase 4 OS=Sus scrofa OX=9823 GN=ST3GAL4 PE=3 SV=1;tr|A0A287A5P0|A0A287A5P0_PIG ST3 beta-galactoside alpha-2,3-sialyltransferase 4 OS=Sus scrofa OX=9823 GN=ST3GAL4 PE=3 SV=2	2	1	3	42.649	372	0.58845	0.19659	1	0	0	0	0	0	0	0	0	0	12992	34571	31811	0	0	0
A0A5G2RDJ3	ST3 beta-galactoside alpha-2,3-sialyltransferase 3	tr|A0A5G2RDJ3|A0A5G2RDJ3_PIG ST3 beta-galactoside alpha-2,3-sialyltransferase 3 OS=Sus scrofa OX=9823 GN=ST3GAL3 PE=3 SV=1;tr|A0A4X1W7G9|A0A4X1W7G9_PIG Uncharacterized protein OS=Sus scrofa OX=9823 GN=ST3GAL3 PE=3 SV=1;tr|A0A5G2QXU5|A0A5G2QXU5_PIG ST3 beta	14	1	3.3	31.374	276	0.63135	0.12437	1	0	0	0	0	0	0	0	0	0	329460	142480	290320	0	0	0
A0A5G2Q8R8	Ssu-2 homolog	tr|A0A5G2Q8R8|A0A5G2Q8R8_PIG Ssu-2 homolog OS=Sus scrofa OX=9823 GN=SSUH2 PE=4 SV=1	1	1	3.7	46.177	405	0.26716	0.61324	2	0	0	0	0	0	0	125060	170420	153735	240440	156483	346640	0	0	0
I3LTZ2	SS18L1 subunit of BAF chromatin remodeling complex	tr|I3LTZ2|I3LTZ2_PIG SS18L1 subunit of BAF chromatin remodeling complex OS=Sus scrofa OX=9823 GN=SS18L1 PE=3 SV=3	1	1	3.2	42.644	406	0.33979	0.46933	1	0	0	0	0	0	0	158420	138580	668370	0	0	0	0	0	0
F1SBA6	SS18 subunit of BAF chromatin remodeling complex	tr|F1SBA6|F1SBA6_PIG SS18 subunit of BAF chromatin remodeling complex OS=Sus scrofa OX=9823 GN=SS18 PE=3 SV=4;tr|A0A4X1VMY8|A0A4X1VMY8_PIG Uncharacterized protein OS=Sus scrofa OX=9823 GN=SS18 PE=3 SV=1;tr|A0A286ZM63|A0A286ZM63_PIG SS18 subunit of BAF chro	5	1	2.3	38.412	352	0.66173	0.019774	1	0	0	0	0	0	0	15904	69135	61325	0	0	0	0	0	0
A0A5G2QKU7	SRP receptor subunit alpha	tr|A0A5G2QKU7|A0A5G2QKU7_PIG SRP receptor subunit alpha OS=Sus scrofa OX=9823 GN=SRPRA PE=1 SV=1;tr|A0A287BMR4|A0A287BMR4_PIG SRP receptor subunit alpha OS=Sus scrofa OX=9823 GN=SRPRA PE=1 SV=2;tr|A0A5G2R814|A0A5G2R814_PIG SRP receptor subunit alpha OS=Sus	8	1	2	65.099	593	0.45722	0.33459	1	0	0	0	368500	20174	14992	0	0	0	0	0	0	0	0	0
A0A286ZMP0	SRF-dependent transcription regulation-associated protein	tr|A0A286ZMP0|A0A286ZMP0_PIG SRF-dependent transcription regulation-associated protein OS=Sus scrofa OX=9823 GN=SRFBP1 PE=4 SV=2	1	1	4	48.66	427	0.65711	0.057824	1	0	0	0	0	0	0	0	0	0	70460	68590	126660	0	0	0
A0A480ZI94	SRC kinase signaling inhibitor 1 isoform X4-like	tr|A0A480ZI94|A0A480ZI94_PIG SRC kinase signaling inhibitor 1 isoform X4-like OS=Sus scrofa OX=9823 PE=4 SV=1;tr|A0A5G2QFA2|A0A5G2QFA2_PIG SRC kinase signaling inhibitor 1 OS=Sus scrofa OX=9823 GN=SRCIN1 PE=1 SV=1;tr|A0A5G2QRM4|A0A5G2QRM4_PIG SRC kinase si	11	2	5.8	44.768	430	0.58622	0.19756	2	0	0	0	116820	7026.7	28162	0	0	0	0	0	0	0	0	0
I3LVM5	Src kinase associated phosphoprotein 2	tr|I3LVM5|I3LVM5_PIG Src kinase associated phosphoprotein 2 OS=Sus scrofa OX=9823 GN=SKAP2 PE=3 SV=2;tr|A0A4X1TWY3|A0A4X1TWY3_PIG PH domain-containing protein OS=Sus scrofa OX=9823 GN=SKAP2 PE=4 SV=1	2	1	2.6	47.734	423	0.58636	0.19714	1	0	0	0	17618	24884	3476	0	0	0	0	0	0	0	0	0
A0A287AYM6	SpoU_methylase domain-containing protein	tr|A0A287AYM6|A0A287AYM6_PIG SpoU_methylase domain-containing protein OS=Sus scrofa OX=9823 GN=TARBP1 PE=4 SV=1;tr|A0A287AYS8|A0A287AYS8_PIG SpoU_methylase domain-containing protein OS=Sus scrofa OX=9823 GN=TARBP1 PE=4 SV=1;tr|F1RGW6|F1RGW6_PIG SpoU_methyl	5	1	0.8	171.98	1535	0.45671	0.33517	1	0	0	0	0	0	0	235264	148630	923700	0	0	0	0	0	0
A0A480XSG3	Splicing factor, suppressor of white-apricot homolog isoform 2	tr|A0A480XSG3|A0A480XSG3_PIG Splicing factor, suppressor of white-apricot homolog isoform 2 OS=Sus scrofa OX=9823 PE=4 SV=1;tr|A0A480XUS0|A0A480XUS0_PIG Splicing factor, suppressor of white-apricot homolog isoform 2 OS=Sus scrofa OX=9823 PE=4 SV=1	2	1	1.6	95.656	867	0.61988	0.14715	1	0	0	0	0	0	0	533230	407380	602990	0	0	0	0	0	0
Q29350	Splicing factor U2AF 35 kDa subunit (Fragment)	sp|Q29350|U2AF1_PIG Splicing factor U2AF 35 kDa subunit (Fragment) OS=Sus scrofa OX=9823 GN=U2AF1 PE=2 SV=3;tr|A0A4X1TFK9|A0A4X1TFK9_PIG Uncharacterized protein OS=Sus scrofa OX=9823 GN=U2AF1L4 PE=4 SV=1;tr|A0A287B0Y5|A0A287B0Y5_PIG U2 small nuclear RNA au	10	1	26.8	9.4164	82	0.4303	0.36979	1	131920	40374	334380	0	0	0	0	0	0	0	0	0	0	0	0
A0A287A4F2	Splicing factor proline and glutamine rich	tr|A0A287A4F2|A0A287A4F2_PIG Splicing factor proline and glutamine rich OS=Sus scrofa OX=9823 GN=SFPQ PE=4 SV=1;tr|A0A287BRG3|A0A287BRG3_PIG Splicing factor proline and glutamine rich OS=Sus scrofa OX=9823 GN=SFPQ PE=4 SV=1;tr|A0A4X1VXP4|A0A4X1VXP4_PIG RRM	3	15	19.7	75.502	702	0	212.11	329	523140	365970	402643	916960	1399500	1158390	915040	1226400	774100	1018700	1217600	1212770	2154000	1896110	2175857
A0A4X1VPH8	Splicing factor 3B subunit 5	tr|A0A4X1VPH8|A0A4X1VPH8_PIG Splicing factor 3B subunit 5 OS=Sus scrofa OX=9823 GN=SF3B5 PE=3 SV=1	1	2	36	10.135	86	0.0025445	11.352	21	0	0	0	142810	183928	152090	190900	320460	364250	314870	342340	266910	614710	204250	518580
A0A480PSI0	Splicing factor 3B subunit 2 isoform X1-like	tr|A0A480PSI0|A0A480PSI0_PIG Splicing factor 3B subunit 2 isoform X1-like OS=Sus scrofa OX=9823 PE=4 SV=1;tr|A0A480PE18|A0A480PE18_PIG Splicing factor 3B subunit 2 OS=Sus scrofa OX=9823 PE=4 SV=1;tr|A0A480KGJ8|A0A480KGJ8_PIG Splicing factor 3B subunit 2 OS	12	1	6.3	25.343	237	0.63229	0.12559	1	0	0	0	0	0	0	0	0	0	41848	13387	34617	0	0	0
A0A480VVV4	Splicing factor 3B subunit 1 isoform 1	tr|A0A480VVV4|A0A480VVV4_PIG Splicing factor 3B subunit 1 isoform 1 OS=Sus scrofa OX=9823 PE=3 SV=1;tr|A0A480NEJ0|A0A480NEJ0_PIG Splicing factor 3B subunit 1 isoform 1 OS=Sus scrofa OX=9823 PE=3 SV=1;tr|A0A480TIK1|A0A480TIK1_PIG Splicing factor 3B subunit	9	4	4.1	114.11	1028	0.027322	1.4155	4	0	0	0	26861	13321	24948	33191	24633	15098	0	0	0	51863	25688	24825
A0A5G2QSK9	Splicing factor 3a subunit 3	tr|A0A5G2QSK9|A0A5G2QSK9_PIG Splicing factor 3a subunit 3 OS=Sus scrofa OX=9823 GN=SF3A3 PE=1 SV=1;tr|A0A4X1VVS7|A0A4X1VVS7_PIG Matrin-type domain-containing protein OS=Sus scrofa OX=9823 GN=SF3A3 PE=3 SV=1;tr|F1SV40|F1SV40_PIG Splicing factor 3A subunit 3	4	1	4	58.127	495	0.64761	0.095179	1	0	0	0	0	0	0	79757	80914	30221	0	0	0	0	0	0
A0A4X1V8J2	Splicing factor 1	tr|A0A4X1V8J2|A0A4X1V8J2_PIG Splicing factor 1 OS=Sus scrofa OX=9823 PE=3 SV=1;tr|A0A480KJZ6|A0A480KJZ6_PIG Splicing factor 1 OS=Sus scrofa OX=9823 PE=3 SV=1;tr|A0A4X1V8N3|A0A4X1V8N3_PIG Splicing factor 1 OS=Sus scrofa OX=9823 PE=3 SV=1;tr|A0A287BC34|A0A28	9	5	11.9	59.697	548	0.0026667	12.932	61	549564	357400	321384	514090	489450	450400	424290	532650	358496	564790	667230	327300	789040	462060	435030
F1STJ3	Spliceosome-associated protein CWC15 homolog	tr|F1STJ3|F1STJ3_PIG Spliceosome-associated protein CWC15 homolog OS=Sus scrofa OX=9823 GN=CWC15 PE=1 SV=2;tr|A0A4X1TWH5|A0A4X1TWH5_PIG Spliceosome-associated protein CWC15 homolog OS=Sus scrofa OX=9823 PE=3 SV=1;tr|A0A480R8N2|A0A480R8N2_PIG Spliceosome-as	3	1	5.3	26.118	228	0.3204	0.51147	3	0	0	0	59899	107170	164560	132260	149550	213550	0	0	0	0	0	0
I3LQ20	Spliceosome associated factor 3, U4/U6 recycling protein	tr|I3LQ20|I3LQ20_PIG Spliceosome associated factor 3, U4/U6 recycling protein OS=Sus scrofa OX=9823 GN=SART3 PE=1 SV=2;tr|A0A4X1SNU1|A0A4X1SNU1_PIG Uncharacterized protein OS=Sus scrofa OX=9823 GN=SART3 PE=4 SV=1;tr|F1RGA7|F1RGA7_PIG Spliceosome associated	7	1	1.8	102.17	900	0.00875	1.7479	2	0	0	0	0	0	0	30888	72734	202750	432194	287970	380610	0	0	0
A0A287A334	Spindlin family member 3	tr|A0A287A334|A0A287A334_PIG Spindlin family member 3 OS=Sus scrofa OX=9823 GN=SPIN3 PE=3 SV=2;tr|A0A4X1VJK4|A0A4X1VJK4_PIG Uncharacterized protein OS=Sus scrofa OX=9823 GN=SPIN3 PE=3 SV=1;tr|A0A480RFK2|A0A480RFK2_PIG Spindlin-3 isoform X1 OS=Sus scrofa OX	5	2	8.4	40.317	358	0.29598	0.55803	2	0	0	0	0	0	0	308830	359060	56046	1706800	1281500	1798200	0	0	0
A0A480UCH3	Sphingomyelin phosphodiesterase 4 isoform 1	tr|A0A480UCH3|A0A480UCH3_PIG Sphingomyelin phosphodiesterase 4 isoform 1 OS=Sus scrofa OX=9823 PE=4 SV=1;tr|A0A4X1UWL9|A0A4X1UWL9_PIG Uncharacterized protein OS=Sus scrofa OX=9823 GN=SMPD4 PE=4 SV=1;tr|A0A287AUS7|A0A287AUS7_PIG Sphingomyelin phosphodiester	14	1	1.4	81.029	721	0.3336	0.48474	1	0	0	0	0	0	0	107480	109030	261720	0	0	0	0	0	0
A0A4X1T2V9	Spermatogenesis-defective protein 39 homolog	tr|A0A4X1T2V9|A0A4X1T2V9_PIG Spermatogenesis-defective protein 39 homolog OS=Sus scrofa OX=9823 GN=VIPAS39 PE=4 SV=1;tr|A0A287AY91|A0A287AY91_PIG Spermatogenesis-defective protein 39 homolog OS=Sus scrofa OX=9823 GN=VIPAS39 PE=4 SV=1;tr|A0A4X1T4W7|A0A4X1T4	10	1	2.9	51.597	444	0.56502	0.21694	1	37181	49823	82152	0	0	0	0	0	0	0	0	0	0	0	0
A0A287A8L3	Spermatogenesis associated serine rich 2 like	tr|A0A287A8L3|A0A287A8L3_PIG Spermatogenesis associated serine rich 2 like OS=Sus scrofa OX=9823 GN=SPATS2L PE=1 SV=2	1	1	2.2	55.722	503	0.37057	0.43484	1	0	0	0	0	0	0	25879	79481	110660	0	0	0	0	0	0
A0A286ZI03	Spermatogenesis associated 46	tr|A0A286ZI03|A0A286ZI03_PIG Spermatogenesis associated 46 OS=Sus scrofa OX=9823 GN=SPATA46 PE=4 SV=1;tr|F1S1D1|F1S1D1_PIG Spermatogenesis associated 46 OS=Sus scrofa OX=9823 GN=SPATA46 PE=4 SV=3	2	1	4.8	23.6	209	0.43065	0.3692	1	0	0	0	0	0	0	0	0	0	0	0	0	119850	57587	20022
F1RR24	Spermatogenesis associated 32	tr|F1RR24|F1RR24_PIG Spermatogenesis associated 32 OS=Sus scrofa OX=9823 GN=SPATA32 PE=4 SV=3;tr|A0A4X1TDX9|A0A4X1TDX9_PIG Uncharacterized protein OS=Sus scrofa OX=9823 PE=4 SV=1	2	2	7.5	38.263	345	0.18433	0.7034	2	0	0	0	506140	32849	83029	0	0	0	60859	36710	82275	0	0	0
A0A5G2REW0	Spermatogenesis associated 3	tr|A0A5G2REW0|A0A5G2REW0_PIG Spermatogenesis associated 3 OS=Sus scrofa OX=9823 GN=SPATA3 PE=4 SV=1;tr|A0A5K1UJ32|A0A5K1UJ32_PIG Spermatogenesis associated 3 OS=Sus scrofa OX=9823 GN=SPATA3 PE=4 SV=1	2	1	3.1	51.857	486	0.49899	0.28899	1	0	0	0	54326	255170	449520	0	0	0	0	0	0	0	0	0
I3LH35	Spermatogenesis and centriole associated 1 like	tr|I3LH35|I3LH35_PIG Spermatogenesis and centriole associated 1 like OS=Sus scrofa OX=9823 GN=SPATC1L PE=4 SV=2;tr|A0A4X1T535|A0A4X1T535_PIG Uncharacterized protein OS=Sus scrofa OX=9823 GN=SPATC1L PE=4 SV=1	2	1	4.7	37.92	344	0.54035	0.24367	1	0	0	0	0	0	0	0	0	0	674960	771940	976030	0	0	0
F1RSL2	Spermatogenesis and centriole associated 1	tr|F1RSL2|F1RSL2_PIG Spermatogenesis and centriole associated 1 OS=Sus scrofa OX=9823 GN=SPATC1 PE=1 SV=4;tr|A0A4X1USS5|A0A4X1USS5_PIG Uncharacterized protein OS=Sus scrofa OX=9823 PE=4 SV=1	2	1	4.4	46.447	435	0.62279	0.14198	1	0	0	0	3493.5	67936	2830.3	0	0	0	0	0	0	0	0	0
F1RVX8	Sperm-tail PG-rich repeat containing 3	tr|F1RVX8|F1RVX8_PIG Sperm-tail PG-rich repeat containing 3 OS=Sus scrofa OX=9823 GN=STPG3 PE=4 SV=4	1	1	5.8	34.133	310	0.61524	0.15585	1	0	0	0	0	0	0	371390	274340	163350	0	0	0	0	0	0
A0A480VJN4	Sperm-associated antigen 8 isoform 1	tr|A0A480VJN4|A0A480VJN4_PIG Sperm-associated antigen 8 isoform 1 OS=Sus scrofa OX=9823 PE=4 SV=1;tr|I3LPT7|I3LPT7_PIG Sperm associated antigen 8 OS=Sus scrofa OX=9823 GN=SPAG8 PE=4 SV=3;tr|F1STB2|F1STB2_PIG Sperm associated antigen 8 OS=Sus scrofa OX=9823	4	1	4.3	50.474	469	0.57323	0.21049	1	0	0	0	0	0	0	0	0	0	94422	168460	295880	0	0	0
A0A4X1UW02	Sperm-associated antigen 7	tr|A0A4X1UW02|A0A4X1UW02_PIG Sperm-associated antigen 7 OS=Sus scrofa OX=9823 PE=4 SV=1	1	1	10.1	26.076	227	0.34858	0.45711	3	0	0	0	14325	90490	59140	46669	35700	15410	0	0	0	0	0	0
A0A480VHQ3	Sperm-associated antigen 5	tr|A0A480VHQ3|A0A480VHQ3_PIG Sperm-associated antigen 5 OS=Sus scrofa OX=9823 PE=4 SV=1;tr|A0A480VUI0|A0A480VUI0_PIG Sperm-associated antigen 5 OS=Sus scrofa OX=9823 PE=4 SV=1;tr|A0A480VHS6|A0A480VHS6_PIG Sperm-associated antigen 5 OS=Sus scrofa OX=9823 PE	8	1	3.2	57.884	524	0.66045	0.041622	1	0	0	0	0	0	0	0	0	0	73232	29855	29951	0	0	0
F1S0B8	Sperm tail PG-rich repeat containing 2	tr|F1S0B8|F1S0B8_PIG Sperm tail PG-rich repeat containing 2 OS=Sus scrofa OX=9823 GN=STPG2 PE=4 SV=3;tr|A0A4X1UFF8|A0A4X1UFF8_PIG Uncharacterized protein OS=Sus scrofa OX=9823 PE=4 SV=1	2	1	2.3	48.688	437	0.19891	0.63752	0	0	0	0	0	0	0	304700	197080	165470	0	0	0	0	0	0
A0A5G2RJD9	Sperm flagellar protein 2	tr|A0A5G2RJD9|A0A5G2RJD9_PIG Sperm flagellar protein 2 OS=Sus scrofa OX=9823 GN=SPEF2 PE=4 SV=1;tr|F1SNC1|F1SNC1_PIG Sperm flagellar protein 2 OS=Sus scrofa OX=9823 GN=SPEF2 PE=4 SV=3;sp|Q2IA00|SPEF2_PIG Sperm flagellar protein 2 OS=Sus scrofa OX=9823 GN=S	4	1	0.6	208.21	1807	0.63235	0.12548	1	0	0	0	93759	26224	29797	0	0	0	0	0	0	0	0	0
B0FTP8	Sperm associated antigen 1 (Fragment)	tr|B0FTP8|B0FTP8_PIG Sperm associated antigen 1 (Fragment) OS=Sus scrofa OX=9823 GN=spag1 PE=4 SV=1;tr|B0FTP7|B0FTP7_PIG Sperm associated antigen 1 (Fragment) OS=Sus scrofa OX=9823 GN=spag1 PE=2 SV=1;tr|A0A480SCT0|A0A480SCT0_PIG Sperm-associated antigen 1	5	1	18.5	13.973	124	0.0057803	2.2518	1	43749	53802	154930	0	0	0	0	0	0	0	0	0	0	0	0
D5K8A9	Sperm acrosome membrane-associated protein 1	sp|D5K8A9|SACA1_PIG Sperm acrosome membrane-associated protein 1 OS=Sus scrofa OX=9823 GN=SPACA1 PE=1 SV=1	1	1	3.7	32.239	295	0.63289	0.12262	1	0	0	0	0	0	0	323740	231650	292240	0	0	0	0	0	0
A0A5G2RF57	Spen family transcriptional repressor	tr|A0A5G2RF57|A0A5G2RF57_PIG Spen family transcriptional repressor OS=Sus scrofa OX=9823 GN=SPEN PE=4 SV=1;tr|A0A287BPC2|A0A287BPC2_PIG Spen family transcriptional repressor OS=Sus scrofa OX=9823 GN=SPEN PE=4 SV=2;tr|A0A286ZJD3|A0A286ZJD3_PIG Spen family t	6	1	0.4	275.87	2552	0.55002	0.23446	1	0	0	0	0	0	0	0	0	0	176470	96735	207150	0	0	0
A0A5G2R3X4	Speedy/RINGO cell cycle regulator family member A	tr|A0A5G2R3X4|A0A5G2R3X4_PIG Speedy/RINGO cell cycle regulator family member A OS=Sus scrofa OX=9823 GN=SPDYA PE=3 SV=1	1	1	4.4	34.575	297	0.63313	0.12696	1	0	0	0	0	0	0	0	0	0	53750	108850	78966	0	0	0
A0A4X1WC29	Spectrin beta chain	tr|A0A4X1WC29|A0A4X1WC29_PIG Spectrin beta chain OS=Sus scrofa OX=9823 PE=3 SV=1;tr|A0A4X1WCA4|A0A4X1WCA4_PIG Spectrin beta chain OS=Sus scrofa OX=9823 PE=3 SV=1;tr|A0A287B8N2|A0A287B8N2_PIG Spectrin beta chain OS=Sus scrofa OX=9823 GN=SPTBN1 PE=1 SV=2;tr|	16	5	2.8	252.1	2175	0.060491	1.1212	7	224390	460920	299621	803220	941210	1197200	276540	608160	244860	518100	627550	622680	0	0	0
A0A5G2Q8C3	Spectrin alpha, erythrocytic 1	tr|A0A5G2Q8C3|A0A5G2Q8C3_PIG Spectrin alpha, erythrocytic 1 OS=Sus scrofa OX=9823 GN=SPTA1 PE=1 SV=1;tr|A0A5G2R924|A0A5G2R924_PIG Spectrin alpha, erythrocytic 1 OS=Sus scrofa OX=9823 GN=SPTA1 PE=1 SV=1;tr|A0A5G2QIC5|A0A5G2QIC5_PIG Spectrin alpha, erythrocy	6	3	1.9	280.02	2408	0.18429	0.69502	3	268540	346370	112900	9306.4	80294	8047.4	0	0	0	0	0	0	0	0	0
A0A5K1VM80	Speckle type BTB/POZ protein	tr|A0A5K1VM80|A0A5K1VM80_PIG Speckle type BTB/POZ protein OS=Sus scrofa OX=9823 GN=SPOP PE=3 SV=1;tr|I3LA15|I3LA15_PIG Speckle type BTB/POZ protein OS=Sus scrofa OX=9823 GN=SPOP PE=3 SV=2;tr|A0A4X1URQ9|A0A4X1URQ9_PIG Uncharacterized protein OS=Sus scrofa O	3	1	4.5	37.384	331	0.58599	0.20134	1	0	0	0	0	0	0	0	0	0	199380	97678	112910	0	0	0
A0A4X1W6U5	SPATA6 domain-containing protein	tr|A0A4X1W6U5|A0A4X1W6U5_PIG SPATA6 domain-containing protein OS=Sus scrofa OX=9823 PE=3 SV=1;tr|A0A480YDI0|A0A480YDI0_PIG Spermatogenesis associated 6 like OS=Sus scrofa OX=9823 GN=SPATA6L PE=3 SV=1;tr|A0A4X1W807|A0A4X1W807_PIG SPATA6 domain-containing pr	10	1	4.5	33.125	288	0.45049	0.3417	1	193770	190474	134820	0	0	0	0	0	0	0	0	0	0	0	0
A0A4X1WAT6	SPATA6 domain-containing protein	tr|A0A4X1WAT6|A0A4X1WAT6_PIG SPATA6 domain-containing protein OS=Sus scrofa OX=9823 GN=SPATA6 PE=3 SV=1	1	1	1.8	55.347	491	0.6563	0.061021	1	0	0	0	15005	14099	42021	0	0	0	0	0	0	0	0	0
A0A5G2QIA6	Spastin	tr|A0A5G2QIA6|A0A5G2QIA6_PIG Spastin OS=Sus scrofa OX=9823 GN=SPAST PE=3 SV=1;tr|A0A4X1TD25|A0A4X1TD25_PIG Spastin OS=Sus scrofa OX=9823 GN=SPAST PE=3 SV=1;tr|A0A5G2QSY7|A0A5G2QSY7_PIG Spastin OS=Sus scrofa OX=9823 GN=SPAST PE=3 SV=1;tr|A0A5G2QUW8|A0A5G2QU	7	1	1.9	63.991	583	0.65507	0.065633	1	0	0	0	0	0	0	0	0	0	236980	184880	308180	0	0	0
A0A0B8RS88	Spastic paraplegia 11 (Autosomal recessive)	tr|A0A0B8RS88|A0A0B8RS88_PIG Spastic paraplegia 11 (Autosomal recessive) OS=Sus scrofa domesticus OX=9825 GN=SPG11 PE=4 SV=1;tr|A0A4X1VDD7|A0A4X1VDD7_PIG Spatacsin_C domain-containing protein OS=Sus scrofa OX=9823 GN=SPG11 PE=4 SV=1;tr|A0A4X1V9K9|A0A4X1V9K	7	1	0.5	252.61	2202	0.6399	0.10612	1	0	0	0	831650	63699	9430	0	0	0	0	0	0	0	0	0
A3RIE0	SPARCL-1	tr|A3RIE0|A3RIE0_PIG SPARCL-1 OS=Sus scrofa OX=9823 PE=2 SV=1;tr|A0A286ZR80|A0A286ZR80_PIG SPARC like 1 OS=Sus scrofa OX=9823 GN=SPARCL1 PE=1 SV=1;tr|A0A4X1U7C2|A0A4X1U7C2_PIG Kazal-like domain-containing protein OS=Sus scrofa OX=9823 GN=SPARCL1 PE=3 SV=1;	8	2	5.9	75.258	662	0.37092	0.43286	2	78665	59947	66036	0	0	0	53375	241090	237500	0	0	0	0	0	0
A0A480PM23	SPARC-related modular calcium-binding protein 1 isoform X1 (Fragment)	tr|A0A480PM23|A0A480PM23_PIG SPARC-related modular calcium-binding protein 1 isoform X1 (Fragment) OS=Sus scrofa OX=9823 PE=4 SV=1;tr|A0A480P8A7|A0A480P8A7_PIG SPARC-related modular calcium-binding protein 1 isoform 2 OS=Sus scrofa OX=9823 PE=4 SV=1;tr|F1S	8	2	4.9	58.251	531	0.10433	0.91283	4	0	0	0	0	0	0	0	0	0	83055	110570	208070	54111	38905	20782
A0A5G2R0J6	SPARC related modular calcium binding 2	tr|A0A5G2R0J6|A0A5G2R0J6_PIG SPARC related modular calcium binding 2 OS=Sus scrofa OX=9823 GN=SMOC2 PE=4 SV=1;tr|A0A4X1VX62|A0A4X1VX62_PIG Uncharacterized protein OS=Sus scrofa OX=9823 PE=4 SV=1	2	1	2.2	51.274	457	0.52454	0.26416	2	153190	240220	186580	0	0	0	305190	348395	289437	0	0	0	0	0	0
P20112	SPARC	sp|P20112|SPRC_PIG SPARC OS=Sus scrofa OX=9823 GN=SPARC PE=1 SV=2;tr|A0A480PT53|A0A480PT53_PIG SPARC isoform 2-like OS=Sus scrofa OX=9823 PE=4 SV=1;tr|A4H2R5|A4H2R5_PIG Osteonectin (Fragment) OS=Sus scrofa OX=9823 GN=SPARC PE=2 SV=1;tr|A0A4X1TU66|A0A4X1TU6	8	2	9.3	34.239	300	0.42691	0.37625	5	236290	196870	201873	0	0	0	0	0	0	0	0	0	0	0	0
A0A286ZKN0	Spalt like transcription factor 3	tr|A0A286ZKN0|A0A286ZKN0_PIG Spalt like transcription factor 3 OS=Sus scrofa OX=9823 GN=SALL3 PE=4 SV=2;tr|A0A4X1U1C3|A0A4X1U1C3_PIG Uncharacterized protein OS=Sus scrofa OX=9823 PE=4 SV=1;tr|F1SNN6|F1SNN6_PIG Spalt like transcription factor 3 OS=Sus scrof	4	1	1.3	101.17	954	0.55709	0.2242	1	0	0	0	137910	50692	214480	0	0	0	0	0	0	0	0	0
A0A4X1VMQ1	SpaA domain-containing protein	tr|A0A4X1VMQ1|A0A4X1VMQ1_PIG SpaA domain-containing protein OS=Sus scrofa OX=9823 GN=LOC100626015 PE=4 SV=1;tr|A0A287AW91|A0A287AW91_PIG SpaA domain-containing protein OS=Sus scrofa OX=9823 GN=LOC100626015 PE=1 SV=1;tr|A0A4X1VI55|A0A4X1VI55_PIG SpaA domain	25	2	1.9	150.68	1381	0.37305	0.42915	3	0	0	0	40066	62445	127430	122010	54978	40091	0	0	0	0	0	0
S5A7V1	SP110 nuclear body protein variant 23	tr|S5A7V1|S5A7V1_PIG SP110 nuclear body protein variant 23 OS=Sus scrofa OX=9823 GN=SP110 PE=2 SV=1	1	1	92.3	1.5378	13	0.30608	0.54446	1	0	0	0	103310	84318	44651	0	0	0	0	0	0	0	0	0
S5AFM5	SP110 nuclear body protein variant 21	tr|S5AFM5|S5AFM5_PIG SP110 nuclear body protein variant 21 OS=Sus scrofa OX=9823 GN=SP110 PE=2 SV=1;tr|S5AFM1|S5AFM1_PIG SP110 nuclear body protein variant 11 OS=Sus scrofa OX=9823 GN=SP110 PE=2 SV=1	2	1	55.6	1.9402	18	0.42544	0.37925	1	0	0	0	0	0	0	0	0	0	2616700	2614800	2942700	0	0	0
S5AAU1	SP110 nuclear body protein variant 19	tr|S5AAU1|S5AAU1_PIG SP110 nuclear body protein variant 19 OS=Sus scrofa OX=9823 GN=SP110 PE=2 SV=1;tr|S5A7U9|S5A7U9_PIG SP110 nuclear body protein variant 18 OS=Sus scrofa OX=9823 GN=SP110 PE=2 SV=1;tr|A0A4X1TMK7|A0A4X1TMK7_PIG Uncharacterized protein OS=	18	1	32.5	4.4872	40	0.19652	0.64789	0	0	0	0	14227	7509	30890	0	0	0	0	0	0	0	0	0
S5AFL8	SP110 nuclear body protein variant 1	tr|S5AFL8|S5AFL8_PIG SP110 nuclear body protein variant 1 OS=Sus scrofa OX=9823 GN=SP110 PE=2 SV=1	1	1	13	13.805	115	0.63992	0.10563	1	0	0	0	0	0	0	0	0	0	205000	99450	161540	0	0	0
A0A4X1VG29	SP-RING-type domain-containing protein	tr|A0A4X1VG29|A0A4X1VG29_PIG SP-RING-type domain-containing protein OS=Sus scrofa OX=9823 GN=RNF138 PE=4 SV=1;tr|A0A287BSC6|A0A287BSC6_PIG Ring finger protein 138 OS=Sus scrofa OX=9823 GN=RNF138 PE=4 SV=1;tr|A0A4X1VK47|A0A4X1VK47_PIG RING-type E3 ubiquitin	6	1	17.2	17.246	151	0.52627	0.26189	1	0	0	0	28288	20680	28801	0	0	0	0	0	0	0	0	0
A0A480PR35	Sorting nexin-5 isoform a	tr|A0A480PR35|A0A480PR35_PIG Sorting nexin-5 isoform a OS=Sus scrofa OX=9823 PE=3 SV=1;tr|A0A4X1UZ19|A0A4X1UZ19_PIG PX domain-containing protein OS=Sus scrofa OX=9823 GN=SNX5 PE=3 SV=1;tr|A0A287A6M6|A0A287A6M6_PIG PX domain-containing protein OS=Sus scrofa	5	1	5.6	37.144	322	0.48701	0.30058	1	111460	3207.1	45075	0	0	0	0	0	0	0	0	0	0	0	0
A0A287A6Y0	Sorting nexin-30	tr|A0A287A6Y0|A0A287A6Y0_PIG Sorting nexin-30 OS=Sus scrofa OX=9823 GN=SNX30 PE=3 SV=1;tr|A0A4X1V4J8|A0A4X1V4J8_PIG Sorting nexin-30 OS=Sus scrofa OX=9823 GN=SNX30 PE=3 SV=1;tr|A0A287B570|A0A287B570_PIG Sorting nexin-30 OS=Sus scrofa OX=9823 GN=SNX30 PE=3	7	1	1.8	45.186	400	0.24257	0.63435	1	0	0	0	0	0	0	113410	54242	38916	0	0	0	0	0	0
A0A4X1U8F3	Sorting nexin-2	tr|A0A4X1U8F3|A0A4X1U8F3_PIG Sorting nexin-2 OS=Sus scrofa OX=9823 GN=SNX2 PE=3 SV=1;tr|A0A287B194|A0A287B194_PIG Sorting nexin-2 OS=Sus scrofa OX=9823 GN=SNX2 PE=1 SV=2;tr|I3LS12|I3LS12_PIG Sorting nexin-2 OS=Sus scrofa OX=9823 GN=SNX2 PE=1 SV=2;tr|A0A4X1	7	1	2.1	54.18	482	0.45833	0.33014	1	0	0	0	38827	170760	63509	0	0	0	0	0	0	0	0	0
A0A5G2QP59	Sorting nexin-17	tr|A0A5G2QP59|A0A5G2QP59_PIG Sorting nexin-17 OS=Sus scrofa OX=9823 GN=SNX17 PE=3 SV=1	1	1	5.3	48.365	430	0.45759	0.33286	2	176990	1589743	95521	0	0	0	313780	200150	170960	0	0	0	0	0	0
A0A4X1TWX3	Sorting nexin-1	tr|A0A4X1TWX3|A0A4X1TWX3_PIG Sorting nexin-1 OS=Sus scrofa OX=9823 PE=3 SV=1;tr|A0A5G2R6E9|A0A5G2R6E9_PIG Sorting nexin-1 OS=Sus scrofa OX=9823 GN=SNX1 PE=1 SV=1;tr|A0A4X1U1X9|A0A4X1U1X9_PIG Sorting nexin-1 OS=Sus scrofa OX=9823 PE=3 SV=1;tr|A0A5G2QNB2|A0A	13	1	2.7	48.617	438	0.45859	0.32798	1	712810	992042	1124635	0	0	0	0	0	0	0	0	0	0	0	0
A0A5G2R1P9	Sorting nexin family member 21	tr|A0A5G2R1P9|A0A5G2R1P9_PIG Sorting nexin family member 21 OS=Sus scrofa OX=9823 GN=SNX21 PE=3 SV=1	1	1	6.9	24.671	218	0.6568	0.063737	1	0	0	0	266787	758356	243904	0	0	0	0	0	0	0	0	0
A0A287ALZ0	Sorting nexin 7	tr|A0A287ALZ0|A0A287ALZ0_PIG Sorting nexin 7 OS=Sus scrofa OX=9823 GN=SNX7 PE=3 SV=2	1	1	4.4	55.517	482	0.49061	0.29562	1	157760	238493	17324	0	0	0	0	0	0	0	0	0	0	0	0
F1RT25	Sorting nexin 3	tr|F1RT25|F1RT25_PIG Sorting nexin 3 OS=Sus scrofa OX=9823 GN=SNX3 PE=1 SV=4;tr|A0A5G2R4Z1|A0A5G2R4Z1_PIG Sorting nexin-3 OS=Sus scrofa OX=9823 GN=SNX3 PE=1 SV=1;tr|A0A4X1VF05|A0A4X1VF05_PIG Sorting nexin-3 OS=Sus scrofa OX=9823 GN=SNX3 PE=3 SV=1;tr|A0A5G2	4	4	19.3	16.315	140	0.0032154	2.7707	10	0	0	0	124220	139403	158380	340652	151520	994410	122970	285760	301540	336240	120780	120360
F1RSX9	Sorting nexin 25	tr|F1RSX9|F1RSX9_PIG Sorting nexin 25 OS=Sus scrofa OX=9823 GN=SNX25 PE=4 SV=4;tr|A0A4X1VY75|A0A4X1VY75_PIG Uncharacterized protein OS=Sus scrofa OX=9823 PE=4 SV=1;tr|A0A4X1VWI5|A0A4X1VWI5_PIG Uncharacterized protein OS=Sus scrofa OX=9823 PE=3 SV=1;tr|A0A4	12	1	1.6	64.643	556	0.65818	0.052468	1	0	0	0	290480	13920	35920	0	0	0	0	0	0	0	0	0
A0A5G2Q8H4	Sorting nexin 20	tr|A0A5G2Q8H4|A0A5G2Q8H4_PIG Sorting nexin 20 OS=Sus scrofa OX=9823 GN=SNX20 PE=3 SV=1	1	1	2	39.511	347	0.22484	0.63435	1	0	0	0	64728	68752	74238	0	0	0	0	0	0	0	0	0
A0A5G2RDE0	Sorting nexin 14	tr|A0A5G2RDE0|A0A5G2RDE0_PIG Sorting nexin 14 OS=Sus scrofa OX=9823 GN=SNX14 PE=3 SV=1;tr|A0A4X1VIZ4|A0A4X1VIZ4_PIG PXA domain-containing protein OS=Sus scrofa OX=9823 GN=SNX14 PE=3 SV=1;tr|F1S0H9|F1S0H9_PIG Sorting nexin 14 OS=Sus scrofa OX=9823 GN=SNX14	11	2	5.3	77.799	664	0.13002	0.83157	1	0	0	0	0	0	0	0	0	0	29787	8849	107530	124220	25775	35313
A0A287AGT7	Sorting nexin	tr|A0A287AGT7|A0A287AGT7_PIG Sorting nexin OS=Sus scrofa OX=9823 GN=SNX6 PE=1 SV=2;tr|A0A5G2QZZ6|A0A5G2QZZ6_PIG Sorting nexin 6 OS=Sus scrofa OX=9823 GN=SNX6 PE=1 SV=1;tr|A0A4X1T833|A0A4X1T833_PIG PX domain-containing protein OS=Sus scrofa OX=9823 GN=SNX6	6	2	7.3	45.329	397	0.19591	0.6519	2	0	0	0	13902	93418	18903	94047	89125	45684	5100800	3586700	4642300	0	0	0
A0A480W0V6	Sortilin isoform 1 preproprotein	tr|A0A480W0V6|A0A480W0V6_PIG Sortilin isoform 1 preproprotein OS=Sus scrofa OX=9823 PE=4 SV=1;tr|A0A480VB16|A0A480VB16_PIG Sortilin isoform X1 OS=Sus scrofa OX=9823 PE=4 SV=1;tr|A0A480IRZ7|A0A480IRZ7_PIG Sortilin isoform 1 preproprotein OS=Sus scrofa OX=98	8	1	3.4	57.213	523	0.53515	0.24989	1	193240	176074	30263	0	0	0	0	0	0	0	0	0	0	0	0
A0A480JD97	Sororin	tr|A0A480JD97|A0A480JD97_PIG Sororin OS=Sus scrofa OX=9823 PE=4 SV=1	1	1	4.7	20.117	191	0.65798	0.052766	1	0	0	0	373520	20447	10054	0	0	0	0	0	0	0	0	0
A0A481DM23	Sorbin and SH3 domain-containing protein 2 isoform X2-like	tr|A0A481DM23|A0A481DM23_PIG Sorbin and SH3 domain-containing protein 2 isoform X2-like OS=Sus scrofa OX=9823 PE=4 SV=1;tr|A0A287A9Z6|A0A287A9Z6_PIG Sorbin and SH3 domain-containing protein 2 OS=Sus scrofa OX=9823 GN=SORBS2 PE=1 SV=2;tr|A0A4X1VW01|A0A4X1VW	21	1	2.8	48.042	427	0.19475	0.66122	3	0	0	0	31939	44778	28356	54706	89592	161880	0	0	0	0	0	0
A0A287AGR3	Sorbin and SH3 domain containing 1	tr|A0A287AGR3|A0A287AGR3_PIG Sorbin and SH3 domain containing 1 OS=Sus scrofa OX=9823 GN=SORBS1 PE=1 SV=2;tr|A0A287BPJ8|A0A287BPJ8_PIG Sorbin and SH3 domain containing 1 OS=Sus scrofa OX=9823 GN=SORBS1 PE=1 SV=2;tr|A0A4X1UNL3|A0A4X1UNL3_PIG Uncharacterized	7	1	0.7	143.1	1291	0.43841	0.35246	1	81144	75722	69045	0	0	0	0	0	0	0	0	0	0	0	0
A0A4X1W7K6	Somatostatin domain-containing protein	tr|A0A4X1W7K6|A0A4X1W7K6_PIG Somatostatin domain-containing protein OS=Sus scrofa OX=9823 PE=3 SV=1	1	1	10.6	13.743	123	0.29044	0.56905	1	0	0	0	0	0	0	0	0	0	0	0	0	36693	100680	94596
A0A4X1UP91	Solute carrier organic anion transporter family member	tr|A0A4X1UP91|A0A4X1UP91_PIG Solute carrier organic anion transporter family member OS=Sus scrofa OX=9823 PE=3 SV=1;tr|A0A5G2R7V7|A0A5G2R7V7_PIG Solute carrier organic anion transporter family member OS=Sus scrofa OX=9823 GN=SLCO2B1 PE=1 SV=1;tr|F1SUN1|F1S	10	1	2.6	71.664	665	0.60259	0.17974	1	43575	31428	13476	58073	20694	10185	0	0	0	0	0	0	0	0	0
F1RXB5	Solute carrier family 7 member 13	tr|F1RXB5|F1RXB5_PIG Solute carrier family 7 member 13 OS=Sus scrofa OX=9823 GN=LOC100522735 PE=4 SV=3;tr|A0A4X1UGQ1|A0A4X1UGQ1_PIG Uncharacterized protein OS=Sus scrofa OX=9823 GN=LOC100522735 PE=4 SV=1	2	1	2	53.919	489	0.58601	0.19724	1	0	0	0	0	0	0	116970	101830	50630	0	0	0	0	0	0
A0A287BEV0	Solute carrier family 66 member 2	tr|A0A287BEV0|A0A287BEV0_PIG Solute carrier family 66 member 2 OS=Sus scrofa OX=9823 GN=SLC66A2 PE=4 SV=2	1	1	2.6	34.72	308	0.39681	0.40624	1	0	0	0	0	0	0	0	0	0	0	0	0	49210	23419	21668
A0A287AKV6	Solute carrier family 66 member 2	tr|A0A287AKV6|A0A287AKV6_PIG Solute carrier family 66 member 2 OS=Sus scrofa OX=9823 GN=SLC66A2 PE=4 SV=2	1	1	5	26.797	240	0.65051	0.085945	1	0	0	0	22448	37315	10076	0	0	0	0	0	0	0	0	0
A0A480KFR3	Solute carrier family 5 member 4 (Fragment)	tr|A0A480KFR3|A0A480KFR3_PIG Solute carrier family 5 member 4 (Fragment) OS=Sus scrofa OX=9823 PE=3 SV=1;tr|A0A4X1V429|A0A4X1V429_PIG Uncharacterized protein OS=Sus scrofa OX=9823 PE=3 SV=1;tr|A0A4X1V4R5|A0A4X1V4R5_PIG Uncharacterized protein OS=Sus scrofa	6	1	1.9	65.14	591	0.48153	0.30655	1	569403	223610	4713600	0	0	0	0	0	0	0	0	0	0	0	0
I3LKT6	Solute carrier family 5 member 2	tr|I3LKT6|I3LKT6_PIG Solute carrier family 5 member 2 OS=Sus scrofa OX=9823 GN=SLC5A2 PE=1 SV=2;tr|A0A4X1T3I5|A0A4X1T3I5_PIG Uncharacterized protein OS=Sus scrofa OX=9823 GN=SLC5A2 PE=3 SV=1;tr|A0A5G2R5M2|A0A5G2R5M2_PIG Solute carrier family 5 member 2 OS=	5	2	5.1	73.188	673	0.66786	-0.53348	1	0	0	0	0	0	0	94107	91822	47291	0	0	0	0	0	0
A0A286ZZH6	Solute carrier family 48 member 1	tr|A0A286ZZH6|A0A286ZZH6_PIG Solute carrier family 48 member 1 OS=Sus scrofa OX=9823 GN=SLC48A1 PE=3 SV=2	1	1	7.1	20.585	183	0.37174	0.43242	2	67955	307390	3444056	0	0	0	0	0	0	0	0	0	0	0	0
F1RII1	Solute carrier family 45 member 1	tr|F1RII1|F1RII1_PIG Solute carrier family 45 member 1 OS=Sus scrofa OX=9823 GN=SLC45A1 PE=4 SV=3;tr|A0A4X1W8H0|A0A4X1W8H0_PIG Uncharacterized protein OS=Sus scrofa OX=9823 GN=SLC45A1 PE=4 SV=1	2	1	3.5	85.864	797	0.57827	0.20689	1	0	0	0	0	0	0	70896	46812	27420	0	0	0	0	0	0
A0A287BDM0	Solute carrier family 43 member 1	tr|A0A287BDM0|A0A287BDM0_PIG Solute carrier family 43 member 1 OS=Sus scrofa OX=9823 GN=SLC43A1 PE=4 SV=1;tr|A0A4X1VQH6|A0A4X1VQH6_PIG Uncharacterized protein OS=Sus scrofa OX=9823 GN=SLC43A1 PE=4 SV=1	2	1	1.9	57.424	517	0.5649	0.21733	1	0	0	0	0	0	0	961770	716260	277060	0	0	0	0	0	0
I3LTT7	Solute carrier family 39 member 6	tr|I3LTT7|I3LTT7_PIG Solute carrier family 39 member 6 OS=Sus scrofa OX=9823 GN=SLC39A6 PE=4 SV=2	1	1	1.4	91.347	811	0.28073	0.59105	0	0	0	0	0	0	0	0	0	0	24647	22036	48776	0	0	0
A0A287B2W6	Solute carrier family 38 member 6	tr|A0A287B2W6|A0A287B2W6_PIG Solute carrier family 38 member 6 OS=Sus scrofa OX=9823 GN=SLC38A6 PE=4 SV=1;tr|F1SRV0|F1SRV0_PIG Solute carrier family 38 member 6 OS=Sus scrofa OX=9823 GN=SLC38A6 PE=4 SV=3;tr|K9IVQ5|K9IVQ5_PIG Putative sodium-coupled neutral	5	1	2.8	47.523	425	0.34029	0.46751	1	205830	155050	1041400	0	0	0	0	0	0	0	0	0	0	0	0
F1SH63	Solute carrier family 35 member E3	tr|F1SH63|F1SH63_PIG Solute carrier family 35 member E3 OS=Sus scrofa OX=9823 GN=SLC35E3 PE=4 SV=4	1	1	3.3	37.356	335	0.55396	0.22856	1	0	0	0	0	0	0	0	0	0	718830	780040	1055000	0	0	0
A0A287BKS6	Solute carrier family 35 member A2	tr|A0A287BKS6|A0A287BKS6_PIG Solute carrier family 35 member A2 OS=Sus scrofa OX=9823 GN=SLC35A2 PE=3 SV=2;tr|A0A4X1VMB8|A0A4X1VMB8_PIG Uncharacterized protein OS=Sus scrofa OX=9823 GN=SLC35A2 PE=3 SV=1;tr|A0A480T5U1|A0A480T5U1_PIG UDP-galactose translocat	9	1	3.3	34.24	332	0.5645	0.21778	1	0	0	0	68964	330460	46182	0	0	0	0	0	0	0	0	0
A0A480MLY1	Solute carrier family 30 member 9	tr|A0A480MLY1|A0A480MLY1_PIG Solute carrier family 30 member 9 OS=Sus scrofa OX=9823 PE=3 SV=1;tr|A0A5G2QS41|A0A5G2QS41_PIG Solute carrier family 30 member 9 OS=Sus scrofa OX=9823 GN=SLC30A9 PE=1 SV=1;tr|A0A5G2QXW4|A0A5G2QXW4_PIG Solute carrier family 30 m	8	1	3.7	39.697	353	0.42337	0.38101	1	240840	200274	223140	0	0	0	0	0	0	0	0	0	0	0	0
B5A8K6	Solute carrier family 30 member 1 (Fragment)	tr|B5A8K6|B5A8K6_PIG Solute carrier family 30 member 1 (Fragment) OS=Sus scrofa OX=9823 GN=SLC30A1 PE=2 SV=1;tr|B6VCB0|B6VCB0_PIG Solute carrier family 30 member 1 OS=Sus scrofa OX=9823 GN=SLC30A1 PE=2 SV=1;tr|A0A4X1TIE8|A0A4X1TIE8_PIG Uncharacterized prot	3	1	4.8	45.457	418	0.2504	0.63435	3	174936	200800	239303	0	0	0	1465500	1375500	1893300	0	0	0	1637400	1923300	1406100
A0A5G2R8E6	Solute carrier family 29 member 2	tr|A0A5G2R8E6|A0A5G2R8E6_PIG Solute carrier family 29 member 2 OS=Sus scrofa OX=9823 GN=SLC29A2 PE=3 SV=1;tr|A0A286ZR88|A0A286ZR88_PIG Solute carrier family 29 member 2 OS=Sus scrofa OX=9823 GN=SLC29A2 PE=3 SV=1;tr|F1RU56|F1RU56_PIG Solute carrier family 2	5	1	3.1	51.084	459	0.61397	0.15741	1	0	0	0	0	0	0	0	0	0	22356	70706	95143	0	0	0
A0A287A1B2	Solute carrier family 27 member 6	tr|A0A287A1B2|A0A287A1B2_PIG Solute carrier family 27 member 6 OS=Sus scrofa OX=9823 GN=SLC27A6 PE=3 SV=2;tr|A0A4X1ULB5|A0A4X1ULB5_PIG Uncharacterized protein OS=Sus scrofa OX=9823 PE=3 SV=1;tr|A0A5G2QRB5|A0A5G2QRB5_PIG Solute carrier family 27 member 6 OS	6	1	1.8	67.191	596	0.41485	0.38916	2	0	0	0	0	0	0	0	0	0	0	0	0	2575100	1248400	1083600
I7CTF3	Solute carrier family 27 member 4 (Fragment)	tr|I7CTF3|I7CTF3_PIG Solute carrier family 27 member 4 (Fragment) OS=Sus scrofa OX=9823 GN=SLC27A4 PE=2 SV=1;tr|A0A4X1TVJ0|A0A4X1TVJ0_PIG AMP-binding_C domain-containing protein OS=Sus scrofa OX=9823 GN=SLC27A4 PE=4 SV=1;tr|B3GLY7|B3GLY7_PIG Fatty acid tra	15	1	10.4	18.315	163	0.5697	0.21248	1	0	0	0	38202	194250	30264	0	0	0	0	0	0	0	0	0
A0A5G2R483	Solute carrier family 26 member 8	tr|A0A5G2R483|A0A5G2R483_PIG Solute carrier family 26 member 8 OS=Sus scrofa OX=9823 GN=SLC26A8 PE=4 SV=1;tr|A0A5G2QT17|A0A5G2QT17_PIG Solute carrier family 26 member 8 OS=Sus scrofa OX=9823 GN=SLC26A8 PE=4 SV=1;tr|A0A287AL46|A0A287AL46_PIG Solute carrier	4	1	1.4	130.04	1149	0.49164	0.29539	2	978120	770080	987440	322992	164560	390463	0	0	0	0	0	0	0	0	0
A0A287A3X5	Solute carrier family 26 member 10	tr|A0A287A3X5|A0A287A3X5_PIG Solute carrier family 26 member 10 OS=Sus scrofa OX=9823 GN=SLC26A10 PE=3 SV=2	1	1	2.3	71.19	653	0.52409	0.26458	1	0	0	0	0	0	0	28066	97687	158310	0	0	0	0	0	0
A0A5G2R3N5	Solute carrier family 25 member 5	tr|A0A5G2R3N5|A0A5G2R3N5_PIG Solute carrier family 25 member 5 OS=Sus scrofa OX=9823 GN=SLC25A5 PE=1 SV=1;tr|A0A4X1W587|A0A4X1W587_PIG Uncharacterized protein OS=Sus scrofa OX=9823 GN=SLC25A5 PE=3 SV=1;tr|F2Z565|F2Z565_PIG ADP/ATP translocase 2 OS=Sus scro	6	7	28.8	28.531	257	0	42.491	70	46346	112500	36617	155983	188930	293047	553580	425470	355800	27714	53248	65193	76791	86160	118340
A0A5G2R157	Solute carrier family 25 member 27	tr|A0A5G2R157|A0A5G2R157_PIG Solute carrier family 25 member 27 OS=Sus scrofa OX=9823 GN=SLC25A27 PE=1 SV=1;tr|A0A4X1UZP0|A0A4X1UZP0_PIG Uncharacterized protein OS=Sus scrofa OX=9823 GN=SLC25A27 PE=3 SV=1;tr|A0A5G2Q788|A0A5G2Q788_PIG Solute carrier family	15	3	11.6	38.459	346	0.66804	-0.50542	2	0	0	0	0	0	0	0	0	0	3221000	1906200	1830300	0	0	0
A0A5G2QT96	Solute carrier family 25 member 11	tr|A0A5G2QT96|A0A5G2QT96_PIG Solute carrier family 25 member 11 OS=Sus scrofa OX=9823 GN=SLC25A11 PE=1 SV=1;tr|A0A4X1UT22|A0A4X1UT22_PIG Uncharacterized protein OS=Sus scrofa OX=9823 GN=SLC25A11 PE=3 SV=1;tr|A0A4X1UXU0|A0A4X1UXU0_PIG Uncharacterized protei	5	2	7.6	28.511	263	0	30.704	58	155590	144210	122026	90829	55221	57550	123670	149807	172260	155660	101380	521210	254300	240550	478450
F1SBG9	Solute carrier family 24 member 3	tr|F1SBG9|F1SBG9_PIG Solute carrier family 24 member 3 OS=Sus scrofa OX=9823 GN=SLC24A3 PE=3 SV=4	1	1	1.3	82.045	743	0.45597	0.33533	1	0	0	0	0	0	0	0	0	0	0	0	0	97378	46532	33401
A0A287ATA6	Solute carrier family 22 member 7	tr|A0A287ATA6|A0A287ATA6_PIG Solute carrier family 22 member 7 OS=Sus scrofa OX=9823 GN=SLC22A7 PE=4 SV=2;sp|Q1RPP5|S22A7_PIG Solute carrier family 22 member 7 OS=Sus scrofa OX=9823 GN=SLC22A7 PE=2 SV=1;tr|A0A480RAD8|A0A480RAD8_PIG Solute carrier family 22	3	1	2.2	58.865	538	0.50889	0.27949	1	0	0	0	23883	38375	62810	0	0	0	0	0	0	0	0	0
A0A286ZVH1	Solute carrier family 2 member 9	tr|A0A286ZVH1|A0A286ZVH1_PIG Solute carrier family 2 member 9 OS=Sus scrofa OX=9823 GN=SLC2A9 PE=3 SV=1	1	1	2.8	67.534	614	0.6368	0.11153	1	55007	260420	1240375	0	0	0	0	0	0	0	0	0	0	0	0
A7LGJ6	Solute carrier family 2 member 7 (Fragment)	tr|A7LGJ6|A7LGJ6_PIG Solute carrier family 2 member 7 (Fragment) OS=Sus scrofa OX=9823 GN=Slc2a7 PE=2 SV=2	1	1	8.9	11.959	112	0.6662	0.0095098	1	0	0	0	0	0	0	0	0	0	188190	93207	94930	0	0	0
A7LGJ3	Solute carrier family 2 member 10 (Fragment)	tr|A7LGJ3|A7LGJ3_PIG Solute carrier family 2 member 10 (Fragment) OS=Sus scrofa OX=9823 GN=Slc2a10 PE=2 SV=2	1	1	21.7	9.0066	83	0.6607	0.030941	1	0	0	0	0	0	0	0	0	0	164400	88606	83970	0	0	0
A0A5G2RM56	Solute carrier family 18 member B1	tr|A0A5G2RM56|A0A5G2RM56_PIG Solute carrier family 18 member B1 OS=Sus scrofa OX=9823 GN=SLC18B1 PE=4 SV=1;tr|A0A4X1V3P2|A0A4X1V3P2_PIG MFS domain-containing protein OS=Sus scrofa OX=9823 PE=4 SV=1;tr|F1S3R0|F1S3R0_PIG MFS-type transporter SLC18B1 OS=Sus s	5	1	2.6	45.594	425	0.33917	0.4708	1	0	0	0	0	0	0	46221	33648	14548	0	0	0	0	0	0
F1SFZ2	Solute carrier family 17 member 6	tr|F1SFZ2|F1SFZ2_PIG Solute carrier family 17 member 6 OS=Sus scrofa OX=9823 GN=SLC17A6 PE=4 SV=1;tr|A0A4X1T1J7|A0A4X1T1J7_PIG MFS domain-containing protein OS=Sus scrofa OX=9823 GN=SLC17A6 PE=4 SV=1	2	1	2.6	64.518	582	0.45994	0.32682	1	114970	6825.4	49602	0	0	0	0	0	0	0	0	0	0	0	0
I3L7H3	Solute carrier family 12 member 7	tr|I3L7H3|I3L7H3_PIG Solute carrier family 12 member 7 OS=Sus scrofa OX=9823 GN=SLC12A7 PE=3 SV=3;tr|K9J6L1|K9J6L1_PIG Solute carrier family 12 member 7 OS=Sus scrofa OX=9823 GN=SLC12A7 PE=2 SV=1;tr|A0A287BE45|A0A287BE45_PIG Solute carrier family 12 member	7	1	1	114.88	1050	0.52398	0.26485	1	0	0	0	0	0	0	0	0	0	0	0	0	871540	302450	470450
A0A287BJ04	Solute carrier family 12 member 6	tr|A0A287BJ04|A0A287BJ04_PIG Solute carrier family 12 member 6 OS=Sus scrofa OX=9823 GN=SLC12A6 PE=3 SV=1;tr|A0A4X1UQT4|A0A4X1UQT4_PIG Uncharacterized protein OS=Sus scrofa OX=9823 GN=SLC12A6 PE=3 SV=1;tr|A0A4X1UR65|A0A4X1UR65_PIG Uncharacterized protein O	11	1	1.6	106.88	962	0.60479	0.17841	1	545080	216770	3312900	0	0	0	0	0	0	0	0	0	0	0	0
A0A5G2QXK9	Solute carrier family 12 member 2	tr|A0A5G2QXK9|A0A5G2QXK9_PIG Solute carrier family 12 member 2 OS=Sus scrofa OX=9823 GN=SLC12A2 PE=1 SV=1;tr|A0A287B1F9|A0A287B1F9_PIG Solute carrier family 12 member 2 OS=Sus scrofa OX=9823 GN=SLC12A2 PE=1 SV=2;tr|A0A5G2RFR6|A0A5G2RFR6_PIG Solute carrier	6	1	1.2	123.49	1140	0.42723	0.37285	1	22228	54007	184940	0	0	0	0	0	0	0	0	0	0	0	0
A0A5G2QHX3	Solute carrier family 10 member 3	tr|A0A5G2QHX3|A0A5G2QHX3_PIG Solute carrier family 10 member 3 OS=Sus scrofa OX=9823 GN=SLC10A3 PE=1 SV=1;tr|A0A4X1T7Z6|A0A4X1T7Z6_PIG Ubiquitin-like domain-containing protein OS=Sus scrofa OX=9823 GN=UBL4A PE=4 SV=1;tr|A0A4X1T7G9|A0A4X1T7G9_PIG Ubiquitin-	7	1	7	17.659	157	0.40732	0.39398	3	0	0	0	20768	46210	31786	99048	36542	44786	0	0	0	0	0	0
P05024	Sodium/potassium-transporting ATPase subunit alpha-1	sp|P05024|AT1A1_PIG Sodium/potassium-transporting ATPase subunit alpha-1 OS=Sus scrofa OX=9823 GN=ATP1A1 PE=1 SV=1;tr|A0A4X1SWE3|A0A4X1SWE3_PIG Sodium/potassium-transporting ATPase subunit alpha OS=Sus scrofa OX=9823 GN=ATP1A1 PE=3 SV=1;tr|D2WKD6|D2WKD6_PI	44	6	8.3	112.68	1021	0	63.785	26	246380	273750	219054	0	0	0	0	0	0	0	0	0	0	0	0
A0A4X1VUL2	Sodium/potassium-transporting ATPase subunit alpha	tr|A0A4X1VUL2|A0A4X1VUL2_PIG Sodium/potassium-transporting ATPase subunit alpha OS=Sus scrofa OX=9823 GN=ATP1A2 PE=3 SV=1;tr|A0A4X1VU39|A0A4X1VU39_PIG Sodium/potassium-transporting ATPase subunit alpha OS=Sus scrofa OX=9823 GN=ATP1A2 PE=3 SV=1;tr|A0A4X1VW9	5	2	1.8	97.044	876	0.34066	0.46583	2	55934	91039	28827	271880	12032	37970	0	0	0	0	0	0	742740	2789300	469340
A0A5G2QKH2	Sodium/nucleoside cotransporter 1	tr|A0A5G2QKH2|A0A5G2QKH2_PIG Sodium/nucleoside cotransporter 1 OS=Sus scrofa OX=9823 GN=SLC28A1 PE=3 SV=1;tr|A0A5G2QYF6|A0A5G2QYF6_PIG Sodium/nucleoside cotransporter OS=Sus scrofa OX=9823 GN=SLC28A1 PE=3 SV=1;tr|F1S6P5|F1S6P5_PIG Sodium/nucleoside cotrans	7	1	1.9	53.048	482	0.54998	0.23288	1	0	0	0	0	0	0	0	0	0	298500	131190	247350	0	0	0
K7GPQ5	Sodium/hydrogen exchanger	tr|K7GPQ5|K7GPQ5_PIG Sodium/hydrogen exchanger OS=Sus scrofa OX=9823 GN=SLC9A6 PE=1 SV=2;tr|A0A0B8S007|A0A0B8S007_PIG Sodium/hydrogen exchanger OS=Sus scrofa domesticus OX=9825 GN=SLC9A6 PE=3 SV=1;tr|A0A5G2RK63|A0A5G2RK63_PIG Sodium/hydrogen exchanger OS=S	6	1	1.2	72.106	649	0.65209	0.081163	1	17909	120475	4338.1	0	0	0	38167	29877	10570	0	0	0	0	0	0
A0A4X1V5B9	Sodium/glucose cotransporter 1	tr|A0A4X1V5B9|A0A4X1V5B9_PIG Sodium/glucose cotransporter 1 OS=Sus scrofa OX=9823 GN=SLC5A1 PE=3 SV=1;tr|A0A140H1A0|A0A140H1A0_PIG Sodium/glucose cotransporter 1 OS=Sus scrofa OX=9823 PE=2 SV=1;tr|A0A4X1V4U2|A0A4X1V4U2_PIG Sodium/glucose cotransporter 1 OS	5	1	3.3	73.042	662	0.1042	0.91802	1	0	0	0	0	0	0	363820	369830	57965	0	0	0	75736	299800	244780
A0A480TWG2	Sodium-coupled neutral amino acid transporter 3 isoform X1	tr|A0A480TWG2|A0A480TWG2_PIG Sodium-coupled neutral amino acid transporter 3 isoform X1 OS=Sus scrofa OX=9823 GN=SLC38A3 PE=1 SV=1;tr|F1RMW0|F1RMW0_PIG Zinc finger protein 428 OS=Sus scrofa OX=9823 GN=ZNF428 PE=1 SV=2	2	2	1.4	60.099	552	0.11163	0.88997	2	0	0	0	19028	20452	35672	0	0	0	0	0	0	0	0	0
A0A5G2Q9E7	Sodium- and chloride-dependent GABA transporter 2	tr|A0A5G2Q9E7|A0A5G2Q9E7_PIG Sodium- and chloride-dependent GABA transporter 2 OS=Sus scrofa OX=9823 GN=SLC6A13 PE=3 SV=1;tr|A0A4X1UKT4|A0A4X1UKT4_PIG Sodium- and chloride-dependent GABA transporter 2 OS=Sus scrofa OX=9823 PE=3 SV=1;tr|A0A5G2QG07|A0A5G2QG0	6	1	2.8	57.28	508	0.49642	0.29211	1	89606	240645	31703	0	0	0	0	0	0	0	0	0	0	0	0
A0A4X1VM77	Sodium channel protein	tr|A0A4X1VM77|A0A4X1VM77_PIG Sodium channel protein OS=Sus scrofa OX=9823 PE=3 SV=1;tr|A0A4X1VHM8|A0A4X1VHM8_PIG Sodium channel protein OS=Sus scrofa OX=9823 PE=3 SV=1	2	1	1.3	211.59	1868	0.32411	0.50486	1	0	0	0	3065200	376710	23353	72097	56611	31382	819500	435910	539880	804460	279450	433710
A0A480RAL7	Sodium bicarbonate transporter-like protein 11 isoform X3	tr|A0A480RAL7|A0A480RAL7_PIG Sodium bicarbonate transporter-like protein 11 isoform X3 OS=Sus scrofa OX=9823 PE=4 SV=1	1	1	2.3	43.904	391	0.44017	0.35136	1	0	0	0	0	0	0	0	0	0	0	0	0	505360	173660	206680
A0A4X1UN43	SOCS box domain-containing protein	tr|A0A4X1UN43|A0A4X1UN43_PIG SOCS box domain-containing protein OS=Sus scrofa OX=9823 GN=RAB40C PE=4 SV=1;tr|A0A287AY05|A0A287AY05_PIG Ras-related protein Rab-40C isoform a OS=Sus scrofa OX=9823 GN=RAB40C PE=4 SV=1	2	1	5.7	31.348	281	0.27757	0.59573	1	27896	46262	37263	0	0	0	0	0	0	0	0	0	0	0	0
A0A4X1T4R9	SNW domain-containing protein 1	tr|A0A4X1T4R9|A0A4X1T4R9_PIG SNW domain-containing protein 1 OS=Sus scrofa OX=9823 GN=SNW1 PE=3 SV=1;tr|I3L897|I3L897_PIG SNW domain-containing protein 1 OS=Sus scrofa OX=9823 GN=SNW1 PE=1 SV=1;tr|A0A5G2QCT6|A0A5G2QCT6_PIG SNW domain-containing protein 1 O	3	2	7.3	61.505	536	0.0045662	2.5619	23	157330	48706	64267	65466	75973	37391	53464	95773	72260	61286	60412	70608	104820	60599	90280
A0A4X1VZY6	SNARE-associated protein Snapin	tr|A0A4X1VZY6|A0A4X1VZY6_PIG SNARE-associated protein Snapin OS=Sus scrofa OX=9823 GN=SNAPIN PE=3 SV=1;tr|A0A286ZUD5|A0A286ZUD5_PIG SNARE-associated protein Snapin OS=Sus scrofa OX=9823 GN=SNAPIN PE=1 SV=1	2	1	12.5	14.86	136	0.50289	0.28562	1	327370	452210	91521	0	0	0	0	0	0	0	0	0	0	0	0
A0A480LMY3	Sn1-specific diacylglycerol lipase beta isoform 1	tr|A0A480LMY3|A0A480LMY3_PIG Sn1-specific diacylglycerol lipase beta isoform 1 OS=Sus scrofa OX=9823 PE=4 SV=1;tr|A0A4X1TVY6|A0A4X1TVY6_PIG Lipase_3 domain-containing protein OS=Sus scrofa OX=9823 PE=4 SV=1;tr|A0A287BEQ4|A0A287BEQ4_PIG Diacylglycerol lipas	3	2	4.3	48.235	440	0.48928	0.2973	2	0	0	0	0	0	0	952160	715980	270240	0	0	0	23209	81725	44655
A0A481DIA0	Sn1-specific diacylglycerol lipase alpha isoform X1-like	tr|A0A481DIA0|A0A481DIA0_PIG Sn1-specific diacylglycerol lipase alpha isoform X1-like OS=Sus scrofa OX=9823 PE=4 SV=1;tr|A0A480KPI4|A0A480KPI4_PIG Sn1-specific diacylglycerol lipase alpha OS=Sus scrofa OX=9823 PE=4 SV=1;tr|A0A4X1VNN8|A0A4X1VNN8_PIG Lipase_	5	1	5	25.646	222	0.61131	0.16585	1	0	0	0	0	0	0	0	0	0	11810	31558	55719	0	0	0
A0A5G2QP17	SMG1 nonsense mediated mRNA decay associated PI3K related kinase	tr|A0A5G2QP17|A0A5G2QP17_PIG SMG1 nonsense mediated mRNA decay associated PI3K related kinase OS=Sus scrofa OX=9823 GN=SMG1 PE=3 SV=1;tr|A0A287B556|A0A287B556_PIG Non-specific serine/threonine protein kinase OS=Sus scrofa OX=9823 GN=SMG1 PE=3 SV=1	2	1	0.2	406.53	3625	0.35539	0.44895	1	35952	69057	13535	0	0	0	0	0	0	0	0	0	0	0	0
A0A4X1TGU4	SMC hinge domain-containing protein	tr|A0A4X1TGU4|A0A4X1TGU4_PIG SMC hinge domain-containing protein OS=Sus scrofa OX=9823 GN=SMC3 PE=4 SV=1	1	1	0.9	135.78	1167	0.25773	0.62823	0	381020	560540	329070	0	0	0	0	0	0	0	0	0	0	0	0
A0A287B5Q2	SMB domain-containing protein	tr|A0A287B5Q2|A0A287B5Q2_PIG SMB domain-containing protein OS=Sus scrofa OX=9823 PE=4 SV=2	1	1	3.5	34.803	316	0.3403	0.4686	1	0	0	0	0	0	0	0	0	0	124370	35879	114460	0	0	0
A0A4X1VKS6	SMAP domain-containing protein	tr|A0A4X1VKS6|A0A4X1VKS6_PIG SMAP domain-containing protein OS=Sus scrofa OX=9823 PE=4 SV=1;tr|A0A287A4T7|A0A287A4T7_PIG Lysine rich nucleolar protein 1 OS=Sus scrofa OX=9823 GN=KNOP1 PE=4 SV=1;tr|I3L9E0|I3L9E0_PIG Lysine rich nucleolar protein 1 OS=Sus sc	4	1	8.8	15.046	136	0.6566	0.063873	1	0	0	0	0	0	0	31101	23480	14807	0	0	0	0	0	0
A0A5G2QJK4	Small ubiquitin-related modifier	tr|A0A5G2QJK4|A0A5G2QJK4_PIG Small ubiquitin-related modifier OS=Sus scrofa OX=9823 GN=SUMO2 PE=3 SV=1;sp|P61958|SUMO2_PIG Small ubiquitin-related modifier 2 OS=Sus scrofa OX=9823 GN=SUMO2 PE=3 SV=1;tr|C7S2Z6|C7S2Z6_PIG Small ubiquitin-related modifier OS=	11	2	24.5	10.782	94	0.0054496	1.9891	24	0	0	0	491390	475710	328400	476050	156180	932960	477010	329400	154480	205760	298920	259600
A0A287BS31	Small nuclear RNA-activating complex polypeptide 3	tr|A0A287BS31|A0A287BS31_PIG Small nuclear RNA-activating complex polypeptide 3 OS=Sus scrofa OX=9823 GN=SNAPC3 PE=3 SV=1;tr|F2Z5Q4|F2Z5Q4_PIG Small nuclear RNA-activating complex polypeptide 3 OS=Sus scrofa OX=9823 GN=SNAPC3 PE=3 SV=1;tr|A0A4X1W5S0|A0A4X1	3	1	5.1	42.052	373	0.31433	0.52589	1	156860	221082	16649	0	0	0	0	0	0	0	0	0	0	0	0
A0A4X1SHZ4	Small nuclear ribonucleoprotein-associated protein	tr|A0A4X1SHZ4|A0A4X1SHZ4_PIG Small nuclear ribonucleoprotein-associated protein OS=Sus scrofa OX=9823 PE=3 SV=1;tr|A0A287AG39|A0A287AG39_PIG Small nuclear ribonucleoprotein-associated protein OS=Sus scrofa OX=9823 PE=3 SV=1;tr|A0A4X1UND7|A0A4X1UND7_PIG Sma	13	2	16.9	23.67	231	0.40391	0.3965	6	0	0	0	89179	155490	115660	147260	178107	139463	182678	175966	215460	0	0	0
A0A5G2QV25	Small nuclear ribonucleoprotein Sm D3	tr|A0A5G2QV25|A0A5G2QV25_PIG Small nuclear ribonucleoprotein Sm D3 OS=Sus scrofa OX=9823 GN=SNRPD3 PE=1 SV=1;tr|A0A4X1V3C3|A0A4X1V3C3_PIG Small nuclear ribonucleoprotein Sm D3 OS=Sus scrofa OX=9823 GN=SNRPD3 PE=3 SV=1;tr|F2Z4Y0|F2Z4Y0_PIG Small nuclear rib	4	1	8.3	13.203	120	0.19967	0.63658	17	0	0	0	294680	206830	397810	243500	224220	240110	326330	346150	852440	413940	332880	327453
A0A4X1W115	Small nuclear ribonucleoprotein Sm D2	tr|A0A4X1W115|A0A4X1W115_PIG Small nuclear ribonucleoprotein Sm D2 OS=Sus scrofa OX=9823 GN=SNRPD2 PE=3 SV=1;tr|A0A287BQU7|A0A287BQU7_PIG Small nuclear ribonucleoprotein Sm D2 OS=Sus scrofa OX=9823 GN=SNRPD2 PE=1 SV=1;tr|A0A5G2QW92|A0A5G2QW92_PIG Small nuc	4	3	33.1	13.527	118	0	49.872	41	209930	195730	239047	503410	470990	556900	270500	691700	138430	810760	689630	825200	761720	401700	564890
A0A4X1VQM0	Small nuclear ribonucleoprotein Sm D1	tr|A0A4X1VQM0|A0A4X1VQM0_PIG Small nuclear ribonucleoprotein Sm D1 OS=Sus scrofa OX=9823 GN=SNRPD1 PE=3 SV=1;tr|A0A4X1VPF0|A0A4X1VPF0_PIG Small nuclear ribonucleoprotein Sm D1 OS=Sus scrofa OX=9823 GN=SNRPD1 PE=3 SV=1;tr|F2Z5G9|F2Z5G9_PIG Small nuclear rib	4	1	11.6	12.393	112	0.12072	0.8529	16	0	0	0	548360	483954	942900	283900	286510	193920	655300	556860	505600	0	0	0
A0A4X1W3U9	Small nuclear ribonucleoprotein G	tr|A0A4X1W3U9|A0A4X1W3U9_PIG Small nuclear ribonucleoprotein G OS=Sus scrofa OX=9823 GN=SNRPG PE=3 SV=1;tr|F2Z5V2|F2Z5V2_PIG Small nuclear ribonucleoprotein G OS=Sus scrofa OX=9823 GN=SNRPG PE=1 SV=1;tr|A0A5G2QI78|A0A5G2QI78_PIG Small nuclear ribonucleopro	3	2	30.3	8.496	76	0.0051613	1.8311	10	180920	249036	140377	228570	256910	164850	272300	216110	138100	279880	200986	387800	0	0	0
I3LDW9	Small nuclear ribonucleoprotein E	tr|I3LDW9|I3LDW9_PIG Small nuclear ribonucleoprotein E OS=Sus scrofa OX=9823 GN=SNRPE PE=3 SV=1;sp|A1XQR9|RUXE_PIG Small nuclear ribonucleoprotein E OS=Sus scrofa OX=9823 GN=SNRPE PE=3 SV=1;tr|A0A4X1V3M7|A0A4X1V3M7_PIG Small nuclear ribonucleoprotein E OS=	5	2	29.3	10.803	92	0.076649	1.0387	7	79949	32465	613020	102950	140670	143620	144810	126280	336810	162812	148950	172260	159300	116170	157260
I3LAJ6	Small monomeric GTPase	tr|I3LAJ6|I3LAJ6_PIG Small monomeric GTPase OS=Sus scrofa OX=9823 GN=RALA PE=1 SV=1;tr|A0A4X1UH51|A0A4X1UH51_PIG Small monomeric GTPase OS=Sus scrofa OX=9823 GN=RALA PE=3 SV=1;tr|I3LV17|I3LV17_PIG Small monomeric GTPase OS=Sus scrofa OX=9823 GN=RALB PE=1 S	4	2	12.6	23.521	206	0.45779	0.3289	2	108540	4155600	162750	39242	175130	64980	0	0	0	0	0	0	0	0	0
F1S0G5	Small integral membrane protein 8	tr|F1S0G5|F1S0G5_PIG Small integral membrane protein 8 OS=Sus scrofa OX=9823 GN=SMIM8 PE=1 SV=1;tr|A0A4X1VLA3|A0A4X1VLA3_PIG Small integral membrane protein 8 OS=Sus scrofa OX=9823 GN=SMIM8 PE=3 SV=1	2	1	11.3	10.973	97	0.39396	0.41147	1	0	0	0	0	0	0	77242	48751	30038	0	0	0	0	0	0
F1S8G6	Small glutamine rich tetratricopeptide repeat containing alpha	tr|F1S8G6|F1S8G6_PIG Small glutamine rich tetratricopeptide repeat containing alpha OS=Sus scrofa OX=9823 GN=SGTA PE=1 SV=2;tr|A0A4X1VS62|A0A4X1VS62_PIG TPR_REGION domain-containing protein OS=Sus scrofa OX=9823 GN=SGTA PE=3 SV=1;tr|A0A287A1V6|A0A287A1V6_P	7	3	13.4	31.267	283	0.0045593	2.5384	27	163690	153030	129403	156920	138700	390990	85565	91875	99340	77604	55183	73957	416630	311430	557670
A0A4X1TFD3	Small acidic protein	tr|A0A4X1TFD3|A0A4X1TFD3_PIG Small acidic protein OS=Sus scrofa OX=9823 GN=C2H11orf58 PE=3 SV=1;tr|A0A480MBG3|A0A480MBG3_PIG Small acidic protein OS=Sus scrofa OX=9823 PE=3 SV=1;tr|A0A5G2QFJ1|A0A5G2QFJ1_PIG Chromosome 2 C11orf58 homolog OS=Sus scrofa OX=98	5	3	27.1	20.162	181	0	90.817	13	132220	276080	293650	493920	191780	208900	371380	212990	393100	172840	238293	149304	132220	644960	614440
F1SQR4	Sm protein F	tr|F1SQR4|F1SQR4_PIG Sm protein F OS=Sus scrofa OX=9823 GN=SNRPF PE=1 SV=2;tr|A0A4X1SJX5|A0A4X1SJX5_PIG Sm protein F OS=Sus scrofa OX=9823 GN=SNRPF PE=3 SV=1	2	2	24.4	9.7251	86	0	35.482	36	0	0	0	114700	121021	149270	45052	31485	38816	137780	156222	287970	0	0	0
A0A5G2RD92	Sm domain-containing protein	tr|A0A5G2RD92|A0A5G2RD92_PIG Sm domain-containing protein OS=Sus scrofa OX=9823 GN=LSM5 PE=3 SV=1;tr|I3LM25|I3LM25_PIG U6 snRNA-associated Sm-like protein LSm5 OS=Sus scrofa OX=9823 GN=LSM5 PE=3 SV=1;tr|A0A4X1SQM6|A0A4X1SQM6_PIG U6 snRNA-associated Sm-like	4	2	37.5	7.0973	64	0.026966	1.4633	4	0	0	0	15056	13730	17800	13084	44153	11800	0	0	0	737000	229550	365390
A0A5G2QWD7	SLIT-ROBO Rho GTPase activating protein	tr|A0A5G2QWD7|A0A5G2QWD7_PIG SLIT-ROBO Rho GTPase activating protein 3 OS=Sus scrofa OX=9823 GN=SRGAP3 PE=1 SV=1;tr|A0A4X1V0N5|A0A4X1V0N5_PIG Uncharacterized protein OS=Sus scrofa OX=9823 PE=4 SV=1;tr|A0A287B8H5|A0A287B8H5_PIG SLIT-ROBO Rho GTPase activati	3	1	1.2	120.11	1063	0.63226	0.12316	1	0	0	0	0	0	0	0	0	0	407580	418850	538470	0	0	0
A0A5G2R4J3	Slit guidance ligand 2	tr|A0A5G2R4J3|A0A5G2R4J3_PIG Slit guidance ligand 2 OS=Sus scrofa OX=9823 GN=SLIT2 PE=4 SV=1;tr|A0A4X1VDR9|A0A4X1VDR9_PIG Uncharacterized protein OS=Sus scrofa OX=9823 PE=4 SV=1;tr|A0A4X1VDR4|A0A4X1VDR4_PIG Uncharacterized protein OS=Sus scrofa OX=9823 PE=	6	1	0.7	169.54	1525	0.48942	0.29695	1	0	0	0	0	0	0	0	0	0	6028800	7571000	4120600	0	0	0
F1RQ61	SLIT and NTRK like family member 2	tr|F1RQ61|F1RQ61_PIG SLIT and NTRK like family member 2 OS=Sus scrofa OX=9823 GN=SLITRK2 PE=3 SV=1	1	1	2.5	95.583	849	0.28285	0.58592	1	157780	258320	74102	0	0	0	0	0	0	0	0	0	0	0	0
A0A287B639	Slingshot protein phosphatase 3	tr|A0A287B639|A0A287B639_PIG Slingshot protein phosphatase 3 OS=Sus scrofa OX=9823 GN=SSH3 PE=1 SV=2	1	1	1.6	60.812	549	0.59613	0.18681	1	0	0	0	0	0	0	0	0	0	324020	308890	460010	0	0	0
A0A5G2QIN1	SLC9A3 regulator 2	tr|A0A5G2QIN1|A0A5G2QIN1_PIG SLC9A3 regulator 2 OS=Sus scrofa OX=9823 GN=SLC9A3R2 PE=1 SV=1	1	1	3.3	38.25	361	0.55172	0.23135	1	0	0	0	0	0	0	0	0	0	50953	90912	58284	0	0	0
A0A286ZR71	SLAIN motif family member 2	tr|A0A286ZR71|A0A286ZR71_PIG SLAIN motif family member 2 OS=Sus scrofa OX=9823 GN=SLAIN2 PE=3 SV=2;tr|F1SEA2|F1SEA2_PIG SLAIN motif family member 2 OS=Sus scrofa OX=9823 GN=SLAIN2 PE=3 SV=2;tr|A0A4X1UJA2|A0A4X1UJA2_PIG Uncharacterized protein OS=Sus scrofa	5	1	4	61.546	569	0.63049	0.12942	1	45904	72495	18394	0	0	0	0	0	0	0	0	0	0	0	0
Q6S7D1	SLA-8	tr|Q6S7D1|Q6S7D1_PIG SLA-8 OS=Sus scrofa OX=9823 PE=2 SV=1;tr|D4NVU5|D4NVU5_PIG MHC class I antigen OS=Sus scrofa OX=9823 GN=SLA-8 PE=2 SV=1;tr|Q9TNZ1|Q9TNZ1_PIG Putative non classical MHC class I antigen OS=Sus scrofa OX=9823 GN=sla-8 PE=3 SV=1;tr|A0A4X1V	10	1	9	40.806	355	0.61994	0.14626	1	0	0	0	0	0	0	0	0	0	0	0	0	17024	66772	36333
O19076	SLA-2 protein (Fragment)	tr|O19076|O19076_PIG SLA-2 protein (Fragment) OS=Sus scrofa OX=9823 GN=SLA-2 PE=4 SV=1	1	1	11.6	10.119	86	0.65056	0.087194	1	0	0	0	0	0	0	44200	32904	12936	0	0	0	0	0	0
A0A286ZKF2	Ski2 like RNA helicase	tr|A0A286ZKF2|A0A286ZKF2_PIG Ski2 like RNA helicase OS=Sus scrofa OX=9823 GN=SKIV2L PE=4 SV=1;tr|F1RQW4|F1RQW4_PIG Ski2 like RNA helicase OS=Sus scrofa OX=9823 GN=SKIV2L PE=1 SV=1	2	2	2.7	131.92	1197	0.65029	0.089288	1	43954	92499	67388	0	0	0	0	0	0	0	0	0	0	0	0
F1SH27	SKI like proto-oncogene	tr|F1SH27|F1SH27_PIG SKI like proto-oncogene OS=Sus scrofa OX=9823 GN=SKIL PE=3 SV=2;tr|A0A4X1VFB9|A0A4X1VFB9_PIG c-SKI_SMAD_bind domain-containing protein OS=Sus scrofa OX=9823 GN=SKIL PE=3 SV=1;tr|A0A4X1V938|A0A4X1V938_PIG c-SKI_SMAD_bind domain-containi	4	1	1.2	74.668	661	0.64775	0.096938	1	14385	39737	22394	0	0	0	0	0	0	0	0	0	0	0	0
A0A4X1T7C2	Sister chromatid cohesion protein DCC1	tr|A0A4X1T7C2|A0A4X1T7C2_PIG Sister chromatid cohesion protein DCC1 OS=Sus scrofa OX=9823 PE=3 SV=1;tr|A0A287AM99|A0A287AM99_PIG Sister chromatid cohesion protein DCC1 OS=Sus scrofa OX=9823 GN=DSCC1 PE=3 SV=2	2	1	2.3	44.949	392	0.44522	0.34529	1	0	0	0	0	0	0	0	0	0	0	0	0	45819	17827	19794
Q0GFC9	Sirtuin1 (Fragment)	tr|Q0GFC9|Q0GFC9_PIG Sirtuin1 (Fragment) OS=Sus scrofa OX=9823 GN=Sirt1 PE=2 SV=1;tr|A0A5G2QXV4|A0A5G2QXV4_PIG Sirtuin 1 OS=Sus scrofa OX=9823 GN=SIRT1 PE=4 SV=1;tr|A0A4X1TRY1|A0A4X1TRY1_PIG Deacetylase sirtuin-type domain-containing protein OS=Sus scrofa	6	1	7.4	19.836	176	0.64789	0.093077	1	83405	99547	74703	0	0	0	0	0	0	0	0	0	0	0	0
F1SRQ7	Single-stranded DNA-binding protein, mitochondrial	tr|F1SRQ7|F1SRQ7_PIG Single-stranded DNA-binding protein, mitochondrial OS=Sus scrofa OX=9823 GN=SSBP1 PE=1 SV=2;tr|A0A4X1V505|A0A4X1V505_PIG Single-stranded DNA-binding protein, mitochondrial OS=Sus scrofa OX=9823 GN=SSBP1 PE=3 SV=1;tr|A0A4X1V0P0|A0A4X1V0	5	3	23.9	16.497	142	0.0028409	15.155	18	97389	78695	46980	85187	124670	121860	76949	86978	75270	137860	107950	295700	145310	99541	121283
I3LJI9	Single-strand-selective monofunctional uracil-DNA glycosylase 1	tr|I3LJI9|I3LJI9_PIG Single-strand-selective monofunctional uracil-DNA glycosylase 1 OS=Sus scrofa OX=9823 GN=SMUG1 PE=1 SV=1;tr|A0A4X1W4T3|A0A4X1W4T3_PIG Uncharacterized protein OS=Sus scrofa OX=9823 GN=SMUG1 PE=3 SV=1	2	1	4.8	29.943	272	0.48135	0.3052	1	0	0	0	0	0	0	0	0	0	0	0	0	291790	1116800	200160
A0A5G2QB52	Sine oculis binding protein homolog	tr|A0A5G2QB52|A0A5G2QB52_PIG Sine oculis binding protein homolog OS=Sus scrofa OX=9823 GN=SOBP PE=4 SV=1;tr|A0A4X1VFK7|A0A4X1VFK7_PIG Uncharacterized protein OS=Sus scrofa OX=9823 PE=4 SV=1;tr|F1RT41|F1RT41_PIG Sine oculis binding protein homolog OS=Sus sc	3	1	1.9	89.057	842	0.31277	0.52621	1	87860	118730	284720	0	0	0	0	0	0	0	0	0	0	0	0
A0A5G2QDY9	Sin3A associated protein 130	tr|A0A5G2QDY9|A0A5G2QDY9_PIG Sin3A associated protein 130 OS=Sus scrofa OX=9823 GN=SAP130 PE=3 SV=1;tr|A0A4X1VRK2|A0A4X1VRK2_PIG SAP130_C domain-containing protein OS=Sus scrofa OX=9823 GN=SAP130 PE=3 SV=1;tr|A0A5G2QAV4|A0A5G2QAV4_PIG Sin3A associated prot	8	1	1.2	101.27	955	0.51104	0.27703	1	0	0	0	128790	56868	218710	0	0	0	0	0	0	0	0	0
A0A286ZV09	SIN3 transcription regulator family member B	tr|A0A286ZV09|A0A286ZV09_PIG SIN3 transcription regulator family member B OS=Sus scrofa OX=9823 GN=SIN3B PE=4 SV=1;tr|A0A0B8S012|A0A0B8S012_PIG SIN3 transcription regulator family member B OS=Sus scrofa domesticus OX=9825 GN=SIN3B PE=4 SV=1;tr|F1S9U7|F1S9U	5	1	0.9	121.79	1057	0.51187	0.27645	1	0	0	0	0	0	0	0	0	0	0	0	0	50218	157850	168660
A0A480S8R4	Signal-induced proliferation-associated protein 1 isoform X1	tr|A0A480S8R4|A0A480S8R4_PIG Signal-induced proliferation-associated protein 1 isoform X1 OS=Sus scrofa OX=9823 PE=4 SV=1;tr|F1RRK2|F1RRK2_PIG Signal-induced proliferation-associated 1 OS=Sus scrofa OX=9823 GN=SIPA1 PE=4 SV=3;tr|A0A5G2QEB2|A0A5G2QEB2_PIG S	3	1	1.6	94.593	883	0.32027	0.51146	1	22085	62715	7389.2	0	0	0	17635	95840	120830	0	0	0	0	0	0
A0A480Y0E3	Signal-induced proliferation-associated 1-like protein 2 isoform X2	tr|A0A480Y0E3|A0A480Y0E3_PIG Signal-induced proliferation-associated 1-like protein 2 isoform X2 OS=Sus scrofa OX=9823 PE=4 SV=1;tr|A0A287AXR3|A0A287AXR3_PIG Signal induced proliferation associated 1 like 2 OS=Sus scrofa OX=9823 GN=SIPA1L2 PE=4 SV=1;tr|A0A	12	1	0.7	153.03	1389	0.55727	0.22387	1	48562	30157	23895	0	0	0	0	0	0	0	0	0	0	0	0
A0A287B4G2	Signal transducing adaptor molecule 2	tr|A0A287B4G2|A0A287B4G2_PIG Signal transducing adaptor molecule 2 OS=Sus scrofa OX=9823 GN=STAM2 PE=3 SV=2;tr|A0A4X1SUT4|A0A4X1SUT4_PIG Uncharacterized protein OS=Sus scrofa OX=9823 GN=STAM2 PE=3 SV=1	2	1	2.7	57.174	517	0.61055	0.16703	1	70539	326130	4594054	0	0	0	0	0	0	0	0	0	0	0	0
A0A286ZXP2	Signal transducing adaptor family member 2	tr|A0A286ZXP2|A0A286ZXP2_PIG Signal transducing adaptor family member 2 OS=Sus scrofa OX=9823 GN=STAP2 PE=4 SV=1;tr|A0A480JTF9|A0A480JTF9_PIG Signal-transducing adaptor protein 2 isoform X3 OS=Sus scrofa OX=9823 PE=4 SV=1;tr|A0A286ZL39|A0A286ZL39_PIG Signa	5	3	6	48.456	434	0.028017	1.3724	2	0	0	0	99883	41772	43966	0	0	0	0	0	0	0	0	0
A0A287AJZ1	Signal transducer and activator of transcription	tr|A0A287AJZ1|A0A287AJZ1_PIG Signal transducer and activator of transcription OS=Sus scrofa OX=9823 GN=STAT3 PE=3 SV=1	1	2	2.3	81.377	706	0.50852	0.2797	2	0	0	0	0	0	0	153040	2398000	843850	205720	100890	167330	0	0	0
I3LGD6	Signal sequence receptor subunit gamma	tr|I3LGD6|I3LGD6_PIG Signal sequence receptor subunit gamma OS=Sus scrofa OX=9823 GN=SSR3 PE=1 SV=1;tr|A0A4X1SJQ4|A0A4X1SJQ4_PIG Signal sequence receptor subunit gamma OS=Sus scrofa OX=9823 GN=SSR3 PE=3 SV=1	2	2	9.7	21.064	185	0.32512	0.50102	2	54684	44156	29201	0	0	0	75881	63705	50972	0	0	0	0	0	0
A0A4X1TS00	Signal recognition particle subunit SRP72	tr|A0A4X1TS00|A0A4X1TS00_PIG Signal recognition particle subunit SRP72 OS=Sus scrofa OX=9823 PE=3 SV=1;tr|A0A4X1TUR7|A0A4X1TUR7_PIG Signal recognition particle subunit SRP72 OS=Sus scrofa OX=9823 PE=3 SV=1;tr|A0A5G2QBU7|A0A5G2QBU7_PIG Signal recognition pa	11	1	1.6	67.925	611	0.66644	0.0089908	1	0	0	0	0	0	0	398940	652960	297480	0	0	0	0	0	0
A0A480NR28	Signal recognition particle subunit SRP68	tr|A0A480NR28|A0A480NR28_PIG Signal recognition particle subunit SRP68 OS=Sus scrofa OX=9823 PE=3 SV=1	1	1	4.1	43.966	395	0.52138	0.2666	1	0	0	0	0	0	0	0	0	0	53699	106950	78495	0	0	0
F1SLA7	Signal recognition particle receptor subunit beta	tr|F1SLA7|F1SLA7_PIG Signal recognition particle receptor subunit beta OS=Sus scrofa OX=9823 GN=SRPRB PE=1 SV=4;tr|A0A480V4L8|A0A480V4L8_PIG Signal recognition particle receptor subunit beta OS=Sus scrofa OX=9823 PE=3 SV=1;tr|A0A5G2QD86|A0A5G2QD86_PIG Sign	5	2	15.5	26.933	245	0.0025773	11.694	3	75894	111300	204070	0	0	0	0	0	0	638580	335360	420800	0	0	0
F1RW08	Signal recognition particle 68	tr|F1RW08|F1RW08_PIG Signal recognition particle 68 OS=Sus scrofa OX=9823 GN=SRP68 PE=1 SV=4	1	1	1.5	82.054	730	0.55739	0.22398	1	0	0	0	0	0	0	0	0	0	0	0	0	41383	123880	105050
A0A5G2QXE7	Signal recognition particle 19	tr|A0A5G2QXE7|A0A5G2QXE7_PIG Signal recognition particle 19 OS=Sus scrofa OX=9823 GN=SRP19 PE=1 SV=1;tr|A0A4X1U058|A0A4X1U058_PIG Uncharacterized protein OS=Sus scrofa OX=9823 GN=SRP19 PE=3 SV=1;tr|F1RLG4|F1RLG4_PIG Signal recognition particle 19 OS=Sus sc	4	1	24	11.894	104	0.63607	0.11711	1	0	0	0	35561	42926	78250	0	0	0	0	0	0	0	0	0
A0A480VMW0	Signal peptide, CUB and EGF-like domain-containing protein 3 isoform X1	tr|A0A480VMW0|A0A480VMW0_PIG Signal peptide, CUB and EGF-like domain-containing protein 3 isoform X1 OS=Sus scrofa OX=9823 PE=4 SV=1;tr|A0A481B7D1|A0A481B7D1_PIG Keratin-associated protein 10-4-like isoform X6 OS=Sus scrofa OX=9823 PE=4 SV=1;tr|A0A480WDM1|	5	1	4.9	34.876	329	0.6674	0.0011523	1	145570	86954	68310	0	0	0	57905	289970	22315	0	0	0	0	0	0
F1RJH1	Signal peptide peptidase like 3	tr|F1RJH1|F1RJH1_PIG Signal peptide peptidase like 3 OS=Sus scrofa OX=9823 GN=SPPL3 PE=3 SV=1;tr|A0A4X1T6G3|A0A4X1T6G3_PIG Uncharacterized protein OS=Sus scrofa OX=9823 GN=SPPL3 PE=3 SV=1;tr|A0A4X1T6G8|A0A4X1T6G8_PIG Uncharacterized protein OS=Sus scrofa O	4	1	2.1	42.334	384	0.42471	0.38001	1	0	0	0	0	0	0	0	0	0	0	0	0	758350	248600	377370
A0A287AG90	Signal induced proliferation associated 1 like 1	tr|A0A287AG90|A0A287AG90_PIG Signal induced proliferation associated 1 like 1 OS=Sus scrofa OX=9823 GN=SIPA1L1 PE=4 SV=1;tr|A0A4X1TYR0|A0A4X1TYR0_PIG Uncharacterized protein OS=Sus scrofa OX=9823 GN=SIPA1L1 PE=4 SV=1;tr|A0A287B4Z1|A0A287B4Z1_PIG Signal-ind	6	2	1.3	193.54	1753	0.29015	0.57307	2	0	0	0	0	0	0	0	0	0	797310	839570	1100800	0	0	0
A0A4X1SMH1	Sideroflexin-1	tr|A0A4X1SMH1|A0A4X1SMH1_PIG Sideroflexin-1 OS=Sus scrofa OX=9823 GN=SFXN1 PE=3 SV=1;tr|A0A287A4Y6|A0A287A4Y6_PIG Sideroflexin-1 OS=Sus scrofa OX=9823 GN=SFXN1 PE=1 SV=1;tr|A0A287A7C0|A0A287A7C0_PIG Sidoreflexin OS=Sus scrofa OX=9823 GN=SFXN1 PE=1 SV=2;tr|	6	1	9.1	31.618	285	0.58637	0.20157	1	197432	150580	885930	0	0	0	0	0	0	0	0	0	0	0	0
A0A480RMB5	Sickle tail protein homolog isoform X8	tr|A0A480RMB5|A0A480RMB5_PIG Sickle tail protein homolog isoform X8 OS=Sus scrofa OX=9823 PE=4 SV=1;tr|A0A4X1TY24|A0A4X1TY24_PIG Uncharacterized protein OS=Sus scrofa OX=9823 PE=4 SV=1;tr|A0A4X1TV39|A0A4X1TV39_PIG Uncharacterized protein OS=Sus scrofa OX=9	3	2	0.9	124.07	1129	0.16164	0.7624	2	0	0	0	0	0	0	26725	13910	12600	257022	165847	204000	0	0	0
A0A480ZWI3	Sialic acid-binding Ig-like lectin 5 (Fragment)	tr|A0A480ZWI3|A0A480ZWI3_PIG Sialic acid-binding Ig-like lectin 5 (Fragment) OS=Sus scrofa OX=9823 PE=4 SV=1	1	2	3.7	42	380	0.40863	0.39327	2	178550	200410	2002643	0	0	0	0	0	0	0	0	0	0	0	0
A0A480MF53	Sialic acid-binding Ig-like lectin 15 (Fragment)	tr|A0A480MF53|A0A480MF53_PIG Sialic acid-binding Ig-like lectin 15 (Fragment) OS=Sus scrofa OX=9823 PE=4 SV=1;tr|F1RPU4|F1RPU4_PIG Sialic acid binding Ig like lectin 15 OS=Sus scrofa OX=9823 GN=SIGLEC15 PE=4 SV=3;tr|A0A5G2R6B2|A0A5G2R6B2_PIG Sialic acid bi	6	1	4.7	27.734	258	0.47056	0.31811	1	0	0	0	0	0	0	0	0	0	0	0	0	103510	491050	460380
A0A286ZZZ4	Sialic acid synthase	tr|A0A286ZZZ4|A0A286ZZZ4_PIG Sialic acid synthase OS=Sus scrofa OX=9823 GN=NANS PE=1 SV=1;tr|A0A4X1U1W6|A0A4X1U1W6_PIG NeuB domain-containing protein OS=Sus scrofa OX=9823 GN=NANS PE=4 SV=1;tr|A0A286ZL00|A0A286ZL00_PIG NeuB domain-containing protein OS=Sus	8	2	9.9	35.194	313	0.44336	0.34913	2	0	0	0	177660	182660	125200	0	0	0	339870	352490	479540	0	0	0
A0A4X1W7Y4	SHSP domain-containing protein	tr|A0A4X1W7Y4|A0A4X1W7Y4_PIG SHSP domain-containing protein OS=Sus scrofa OX=9823 GN=HSPB7 PE=3 SV=1;tr|A0A287A0M1|A0A287A0M1_PIG Heat shock protein beta-7 isoform 2 OS=Sus scrofa OX=9823 PE=3 SV=1	2	1	7.7	18.486	169	0.63029	0.13009	1	0	0	0	0	0	0	20856	69880	62506	0	0	0	0	0	0
A0A287BG49	Short-chain-specific acyl-CoA dehydrogenase, mitochondrial	tr|A0A287BG49|A0A287BG49_PIG Short-chain-specific acyl-CoA dehydrogenase, mitochondrial OS=Sus scrofa OX=9823 GN=ACADS PE=1 SV=1;tr|A0A4X1T534|A0A4X1T534_PIG Uncharacterized protein OS=Sus scrofa OX=9823 GN=UNC119B PE=3 SV=1	2	1	4.6	42.811	393	0.15034	0.78642	0	0	0	0	0	0	0	0	0	0	0	0	0	1272700	4147700	541770
I3LVT2	SHC binding and spindle associated 1 like	tr|I3LVT2|I3LVT2_PIG SHC binding and spindle associated 1 like OS=Sus scrofa OX=9823 GN=SHCBP1L PE=4 SV=2;tr|A0A4X1TYZ5|A0A4X1TYZ5_PIG CASH domain-containing protein OS=Sus scrofa OX=9823 GN=SHCBP1L PE=4 SV=1	2	2	3.2	72.568	653	0.66809	-0.39876	2	0	0	0	0	0	0	5492800	3613500	1291300	0	0	0	0	0	0
A0A287AM23	SHC adaptor protein 3	tr|A0A287AM23|A0A287AM23_PIG SHC adaptor protein 3 OS=Sus scrofa OX=9823 GN=SHC3 PE=4 SV=1	1	1	17.1	11.422	105	0.53575	0.24994	1	0	0	0	0	0	0	281070	132180	112990	0	0	0	0	0	0
A0A4X1VQG4	SH3_10 domain-containing protein	tr|A0A4X1VQG4|A0A4X1VQG4_PIG SH3_10 domain-containing protein OS=Sus scrofa OX=9823 GN=PPL PE=4 SV=1;tr|A0A4X1VLA9|A0A4X1VLA9_PIG SH3_10 domain-containing protein OS=Sus scrofa OX=9823 GN=PPL PE=4 SV=1;tr|A0A480S8T7|A0A480S8T7_PIG Periplakin OS=Sus scrofa	6	2	1.5	202.99	1750	0.39423	0.41161	2	0	0	0	49230	230840	54489	0	0	0	517220	522730	698670	0	0	0
A0A4X1SHG7	SH3 domain-containing protein	tr|A0A4X1SHG7|A0A4X1SHG7_PIG SH3 domain-containing protein OS=Sus scrofa OX=9823 PE=4 SV=1;tr|A0A480S6B0|A0A480S6B0_PIG Src substrate cortactin isoform a OS=Sus scrofa OX=9823 PE=4 SV=1;tr|A0A480KCK7|A0A480KCK7_PIG Src substrate cortactin isoform a OS=Sus	15	3	11.3	56.513	505	0	33.945	12	178000	420570	489950	107220	61559	96388	108060	90374	113970	0	0	0	0	0	0
A0A4X1UYI9	SH3 domain-binding glutamic acid-rich-like protein	tr|A0A4X1UYI9|A0A4X1UYI9_PIG SH3 domain-binding glutamic acid-rich-like protein OS=Sus scrofa OX=9823 GN=SH3BGRL2 PE=3 SV=1;tr|A0A4X1V2Q0|A0A4X1V2Q0_PIG SH3 domain-binding glutamic acid-rich-like protein OS=Sus scrofa OX=9823 GN=SH3BGRL2 PE=3 SV=1;tr|A0A5G	4	1	13	10.666	92	0.56723	0.21399	1	0	0	0	0	0	0	0	0	0	0	0	0	153230	62752	28177
I3LJ47	SH3 domain binding protein 5	tr|I3LJ47|I3LJ47_PIG SH3 domain binding protein 5 OS=Sus scrofa OX=9823 GN=SH3BP5 PE=3 SV=3;tr|A0A4X1UXM2|A0A4X1UXM2_PIG Uncharacterized protein OS=Sus scrofa OX=9823 PE=3 SV=1	2	1	2.9	49.936	452	0.6394	0.10769	1	0	0	0	0	0	0	145770	219470	212690	0	0	0	0	0	0
A0A5G2QTG5	SH3 domain binding glutamate rich protein like 3	tr|A0A5G2QTG5|A0A5G2QTG5_PIG SH3 domain binding glutamate rich protein like 3 OS=Sus scrofa OX=9823 GN=SH3BGRL3 PE=1 SV=1;tr|A0A4X1VI08|A0A4X1VI08_PIG Uncharacterized protein OS=Sus scrofa OX=9823 GN=SH3BGRL3 PE=3 SV=1;tr|A0A4X1VLZ6|A0A4X1VLZ6_PIG SH3 doma	4	4	40.9	9.5346	88	0.0021692	6.5182	38	218460	499960	514060	131210	253930	190170	174830	117160	198060	342700	176960	515930	1343200	915970	906754
A0A287A2S6	SH3 domain binding glutamate rich protein like	tr|A0A287A2S6|A0A287A2S6_PIG SH3 domain binding glutamate rich protein like OS=Sus scrofa OX=9823 GN=SH3BGRL PE=1 SV=2	1	1	6	24.507	218	0.63156	0.12444	1	0	0	0	13999	34967	55860	0	0	0	0	0	0	0	0	0
A0A481A9X8	SH3 domain and tetratricopeptide repeat-containing protein 2	tr|A0A481A9X8|A0A481A9X8_PIG SH3 domain and tetratricopeptide repeat-containing protein 2 OS=Sus scrofa OX=9823 PE=4 SV=1;tr|A0A481D7S4|A0A481D7S4_PIG SH3 domain and tetratricopeptide repeat-containing protein 2 OS=Sus scrofa OX=9823 PE=4 SV=1;tr|A0A5G2R7F	9	2	4.1	87.742	796	0.3457	0.4608	2	88981	119750	301375	0	0	0	0	0	0	0	0	0	50006	23869	22608
A0A287A8X0	SH3 and PX domains 2A	tr|A0A287A8X0|A0A287A8X0_PIG SH3 and PX domains 2A OS=Sus scrofa OX=9823 GN=SH3PXD2A PE=4 SV=1;tr|A0A480Y2T9|A0A480Y2T9_PIG SH3 and PX domain-containing protein 2A OS=Sus scrofa OX=9823 GN=SH3PXD2A PE=4 SV=1;tr|A0A5G2QAA5|A0A5G2QAA5_PIG SH3 and PX domains	11	1	1.4	105.64	968	0.56039	0.221	1	0	0	0	0	0	0	1316500	883280	431860	0	0	0	0	0	0
A0A480LXQ7	SH3 and multiple ankyrin repeat domains protein 3	tr|A0A480LXQ7|A0A480LXQ7_PIG SH3 and multiple ankyrin repeat domains protein 3 OS=Sus scrofa OX=9823 PE=4 SV=1;tr|A0A480LLC0|A0A480LLC0_PIG SH3 and multiple ankyrin repeat domains protein 3 OS=Sus scrofa OX=9823 PE=4 SV=1;tr|A0A480MZ18|A0A480MZ18_PIG SH3 a	7	1	0.9	139.28	1321	0.50252	0.28731	1	240920	300375	227760	0	0	0	0	0	0	0	0	0	0	0	0
A0A480ZVC0	SH3 and multiple ankyrin repeat domains protein 2 isoform 2	tr|A0A480ZVC0|A0A480ZVC0_PIG SH3 and multiple ankyrin repeat domains protein 2 isoform 2 OS=Sus scrofa OX=9823 PE=4 SV=1	1	1	1.7	132.21	1240	0.38587	0.419	1	0	0	0	0	0	0	0	0	0	155780	83565	75689	0	0	0
A0A5G2QQP7	SH3 and multiple ankyrin repeat domains 2	tr|A0A5G2QQP7|A0A5G2QQP7_PIG SH3 and multiple ankyrin repeat domains 2 OS=Sus scrofa OX=9823 GN=SHANK2 PE=4 SV=1;tr|A0A287BBM7|A0A287BBM7_PIG SH3 and multiple ankyrin repeat domains 2 OS=Sus scrofa OX=9823 GN=SHANK2 PE=4 SV=2	2	2	8	31.446	289	0.047236	1.2202	1	12571	40411	23940	0	0	0	10097235	9086866	15808000	0	0	0	0	0	0
A0A5G2QQY0	SH3 and cysteine rich domain 2	tr|A0A5G2QQY0|A0A5G2QQY0_PIG SH3 and cysteine rich domain 2 OS=Sus scrofa OX=9823 GN=STAC2 PE=1 SV=1;tr|A0A5G2RAY3|A0A5G2RAY3_PIG SH3 and cysteine rich domain 2 OS=Sus scrofa OX=9823 GN=STAC2 PE=1 SV=1	2	1	2.2	54.398	498	0.55254	0.22988	1	0	0	0	14875	94989	10709	0	0	0	0	0	0	0	0	0
A0A480MT22	SH2B adapter protein 1	tr|A0A480MT22|A0A480MT22_PIG SH2B adapter protein 1 OS=Sus scrofa OX=9823 PE=3 SV=1;tr|E3Q1N1|E3Q1N1_PIG SH2B adaptor protein 1 (Fragment) OS=Sus scrofa OX=9823 GN=SH2B1 PE=4 SV=1;tr|A0A5G2RFI8|A0A5G2RFI8_PIG SH2B adaptor protein 1 OS=Sus scrofa OX=9823 GN	8	2	4.3	78.383	743	0.1153	0.87561	1	33245	51114	101273	0	0	0	0	0	0	280460	238530	360710	0	0	0
A0A480ZHY5	SH2 domain-containing protein 5 isoform X2 (Fragment)	tr|A0A480ZHY5|A0A480ZHY5_PIG SH2 domain-containing protein 5 isoform X2 (Fragment) OS=Sus scrofa OX=9823 PE=4 SV=1;tr|F1SU08|F1SU08_PIG SH2 domain containing 5 OS=Sus scrofa OX=9823 GN=SH2D5 PE=4 SV=4;tr|A0A4X1W6F8|A0A4X1W6F8_PIG Uncharacterized protein OS	3	2	8.3	26.272	240	0.34664	0.45972	2	0	0	0	0	0	0	63273	43331	22260	3782.5	16648	66577	0	0	0
A0A480DK59	SH2 domain-containing protein 3A	tr|A0A480DK59|A0A480DK59_PIG SH2 domain-containing protein 3A OS=Sus scrofa OX=9823 PE=4 SV=1	1	1	1.4	60.667	569	0.6607	0.029957	1	0	0	0	0	0	0	23798	118940	363830	0	0	0	0	0	0
A0A5G2QMY3	SH2 domain-containing protein	tr|A0A5G2QMY3|A0A5G2QMY3_PIG SH2 domain-containing protein OS=Sus scrofa OX=9823 GN=TNS1 PE=1 SV=1;tr|A0A480K0X5|A0A480K0X5_PIG Tensin-1 isoform 3 OS=Sus scrofa OX=9823 PE=3 SV=1;tr|A0A481C2R7|A0A481C2R7_PIG Tensin-1 isoform X15 (Fragment) OS=Sus scrofa OX	16	2	2.7	88.503	845	0.018779	1.5528	4	459770	201360	2027531	997660	95646	13292	0	0	0	0	0	0	0	0	0
A0A5K1ULC2	SH2 domain containing 6	tr|A0A5K1ULC2|A0A5K1ULC2_PIG SH2 domain containing 6 OS=Sus scrofa OX=9823 GN=SH2D6 PE=4 SV=1;tr|A0A4X1W693|A0A4X1W693_PIG Uncharacterized protein OS=Sus scrofa OX=9823 PE=4 SV=1	2	1	12	15.439	150	0.1395	0.81296	0	0	0	0	42913	15733	29420	0	0	0	0	0	0	0	0	0
A0A5G2QN18	SGT1 homolog, MIS12 kinetochore complex assembly cochaperone	tr|A0A5G2QN18|A0A5G2QN18_PIG SGT1 homolog, MIS12 kinetochore complex assembly cochaperone OS=Sus scrofa OX=9823 GN=SUGT1 PE=1 SV=1;tr|A0A4X1VCZ2|A0A4X1VCZ2_PIG Uncharacterized protein OS=Sus scrofa OX=9823 GN=SUGT1 PE=3 SV=1;tr|A0A4X1V9C5|A0A4X1V9C5_PIG Un	4	3	11.4	37.959	333	0.002439	9.6751	56	161700	169654	139243	270890	463910	570280	331820	411770	377700	225770	209670	286820	206630	243840	133440
A0A4X1U5S0	SGF29 C-terminal domain-containing protein	tr|A0A4X1U5S0|A0A4X1U5S0_PIG SGF29 C-terminal domain-containing protein OS=Sus scrofa OX=9823 GN=SGF29 PE=4 SV=1;tr|A0A4X1U8F2|A0A4X1U8F2_PIG SGF29 C-terminal domain-containing protein OS=Sus scrofa OX=9823 GN=SGF29 PE=4 SV=1;tr|A0A287AHX2|A0A287AHX2_PIG S	5	1	3.3	30.645	270	0.66759	-0.0052969	1	0	0	0	24638	141590	14175	0	0	0	0	0	0	0	0	0
A0A4X1VGV0	SF3b1 domain-containing protein	tr|A0A4X1VGV0|A0A4X1VGV0_PIG SF3b1 domain-containing protein OS=Sus scrofa OX=9823 GN=SF3B1 PE=3 SV=1;tr|A0A287AV35|A0A287AV35_PIG Splicing factor 3b subunit 1 OS=Sus scrofa OX=9823 GN=SF3B1 PE=1 SV=1	2	3	2.7	129.64	1158	0.65391	0.067812	1	0	0	0	0	0	0	85809	86068	38526	0	0	0	0	0	0
A0A480JA60	SET domain-containing protein 5	tr|A0A480JA60|A0A480JA60_PIG SET domain-containing protein 5 OS=Sus scrofa OX=9823 PE=4 SV=1;tr|A0A480QSV7|A0A480QSV7_PIG SET domain-containing protein 5 isoform X15 OS=Sus scrofa OX=9823 PE=4 SV=1;tr|A0A480PQF3|A0A480PQF3_PIG SET domain-containing protein	22	1	1.9	120.14	1080	0.65061	0.077668	1	94767	405743	113350	0	0	0	0	0	0	0	0	0	0	0	0
A0A4X1SF32	SET domain-containing protein	tr|A0A4X1SF32|A0A4X1SF32_PIG SET domain-containing protein OS=Sus scrofa OX=9823 GN=PRDM11 PE=4 SV=1;tr|A0A287AZF7|A0A287AZF7_PIG PR domain-containing protein 11 isoform X1 OS=Sus scrofa OX=9823 GN=PRDM11 PE=4 SV=1;tr|F1SHJ3|F1SHJ3_PIG SET domain-containin	5	2	1.5	134.18	1177	0.60945	0.16811	2	0	0	0	30775	37840	32502	31038	23022	14588	53323	35925	70935	0	0	0
C3RZA3	SET domain bifurcated 1 (Fragment)	tr|C3RZA3|C3RZA3_PIG SET domain bifurcated 1 (Fragment) OS=Sus scrofa OX=9823 PE=2 SV=1;tr|A0A481BXI5|A0A481BXI5_PIG Histone-lysine N-methyltransferase SETDB1 isoform 1 OS=Sus scrofa OX=9823 PE=4 SV=1;tr|A0A481BZ75|A0A481BZ75_PIG Histone-lysine N-methyltra	13	1	4.5	36.308	336	0.56097	0.22113	1	290340	1658941	65128	0	0	0	0	0	0	0	0	0	0	0	0
A0A5G2QPG1	SET binding protein 1	tr|A0A5G2QPG1|A0A5G2QPG1_PIG SET binding protein 1 OS=Sus scrofa OX=9823 GN=SETBP1 PE=4 SV=1;tr|A0A4X1UVT6|A0A4X1UVT6_PIG Uncharacterized protein OS=Sus scrofa OX=9823 PE=4 SV=1;tr|F1RQG5|F1RQG5_PIG SET binding protein 1 OS=Sus scrofa OX=9823 GN=SETBP1 PE=	3	1	0.8	174.74	1595	0.65473	0.068736	1	0	0	0	0	0	0	55089	59766	46447	0	0	0	0	0	0
A0A480VIN5	Sestrin-1 isoform 2	tr|A0A480VIN5|A0A480VIN5_PIG Sestrin-1 isoform 2 OS=Sus scrofa OX=9823 PE=3 SV=1;tr|A0A5G2QJ17|A0A5G2QJ17_PIG Sestrin 1 OS=Sus scrofa OX=9823 GN=SESN1 PE=3 SV=1	2	1	2.3	60.069	523	0.51096	0.27805	1	58476	124050	30744	0	0	0	0	0	0	0	0	0	0	0	0
A0A480PTK3	Seryl-tRNA synthetase	tr|A0A480PTK3|A0A480PTK3_PIG Seryl-tRNA synthetase OS=Sus scrofa OX=9823 PE=3 SV=1;tr|A0A480IJF1|A0A480IJF1_PIG Seryl-tRNA synthetase OS=Sus scrofa OX=9823 PE=3 SV=1;tr|F1S5Z3|F1S5Z3_PIG Seryl-tRNA synthetase OS=Sus scrofa OX=9823 GN=SARS1 PE=1 SV=3;tr|A0A	7	2	5.4	52.886	466	0.39879	0.40437	2	0	0	0	72573	51529	107410	0	0	0	0	0	0	0	0	0
A0A480T6V3	Serum paraoxonase/arylesterase 1	tr|A0A480T6V3|A0A480T6V3_PIG Serum paraoxonase/arylesterase 1 OS=Sus scrofa OX=9823 PE=3 SV=1;tr|F1SFA1|F1SFA1_PIG Paraoxonase 1 OS=Sus scrofa OX=9823 GN=PON1 PE=1 SV=3;tr|A0A4X1TQT5|A0A4X1TQT5_PIG Uncharacterized protein OS=Sus scrofa OX=9823 GN=PON1 PE=3	6	1	7.7	30.64	271	0.61344	0.1615	1	0	0	0	0	0	0	41887	100320	188980	0	0	0	0	0	0
O19063	Serum amyloid P-component	sp|O19063|SAMP_PIG Serum amyloid P-component OS=Sus scrofa OX=9823 GN=APCS PE=2 SV=1	1	1	4.5	25.641	224	0.25536	0.63218	1	0	0	0	0	0	0	0	0	0	0	0	0	48106	149650	153880
A0A5G2QFI9	Serum amyloid A protein	tr|A0A5G2QFI9|A0A5G2QFI9_PIG Serum amyloid A protein OS=Sus scrofa OX=9823 GN=SAA2 PE=1 SV=1	1	1	6.1	18.204	164	0.32372	0.50317	1	22606	81210	30027	0	0	0	0	0	0	0	0	0	0	0	0
I3L6L7	SERTA domain containing 1	tr|I3L6L7|I3L6L7_PIG SERTA domain containing 1 OS=Sus scrofa OX=9823 GN=SERTAD1 PE=4 SV=2;tr|A0A4X1SPU5|A0A4X1SPU5_PIG SERTA domain-containing protein OS=Sus scrofa OX=9823 PE=4 SV=1	2	1	3.8	25.211	239	0.2665	0.61468	0	0	0	0	0	0	0	0	0	0	0	0	0	33227	98227	57048
A0A5G2QNW1	SERPINE1 mRNA binding protein 1	tr|A0A5G2QNW1|A0A5G2QNW1_PIG SERPINE1 mRNA binding protein 1 OS=Sus scrofa OX=9823 GN=SERBP1 PE=1 SV=1;tr|A0A4X1V0E9|A0A4X1V0E9_PIG HABP4_PAI-RBP1 domain-containing protein OS=Sus scrofa OX=9823 GN=SERBP1 PE=4 SV=1;tr|F1S827|F1S827_PIG Plasminogen activato	5	5	23.4	42.971	389	0	323.31	53	350790	176670	251110	424870	518850	690750	425990	348330	260400	335880	292580	602620	347660	445130	789720
F1SH45	Serpin family I member 2	tr|F1SH45|F1SH45_PIG Serpin family I member 2 OS=Sus scrofa OX=9823 GN=SERPINI2 PE=3 SV=1;tr|A0A4X1VEQ2|A0A4X1VEQ2_PIG SERPIN domain-containing protein OS=Sus scrofa OX=9823 GN=SERPINI2 PE=3 SV=1	2	1	3.2	46.108	405	0.47376	0.31506	1	0	0	0	0	0	0	89554	169040	26590	0	0	0	0	0	0
A0A287AYJ8	Serpin family F member 1	tr|A0A287AYJ8|A0A287AYJ8_PIG Serpin family F member 1 OS=Sus scrofa OX=9823 GN=SERPINF1 PE=1 SV=1	1	1	3.5	47.665	433	0.45866	0.32961	1	0	0	0	0	0	0	62938	38853	13665	0	0	0	0	0	0
A0A5G2QVB2	Serpin family E member 2	tr|A0A5G2QVB2|A0A5G2QVB2_PIG Serpin family E member 2 OS=Sus scrofa OX=9823 GN=SERPINE2 PE=1 SV=1;tr|A0A288CG58|A0A288CG58_PIG Serpin family E member 2 OS=Sus scrofa OX=9823 GN=SERPINE2 PE=1 SV=1;tr|A0A5K1UAD0|A0A5K1UAD0_PIG Serpin family E member 2 OS=Sus	9	6	25.1	36.484	327	0.045872	1.2409	7	272880	127280	223047	0	0	0	0	0	0	0	0	0	0	0	0
I3LMU0	Serpin family A member 11	tr|I3LMU0|I3LMU0_PIG Serpin family A member 11 OS=Sus scrofa OX=9823 GN=SERPINA11 PE=3 SV=2	1	1	4.3	46.807	422	0.61061	0.1696	1	0	0	0	0	0	0	0	0	0	328490	139970	277500	0	0	0
A0A4X1SG20	SERPIN domain-containing protein	tr|A0A4X1SG20|A0A4X1SG20_PIG SERPIN domain-containing protein OS=Sus scrofa OX=9823 PE=3 SV=1	1	1	2.1	46.691	423	0.63224	0.12495	1	190324	148210	847830	0	0	0	0	0	0	108860	112550	378200	0	0	0
F1SMW3	Serpin B5	tr|F1SMW3|F1SMW3_PIG Serpin B5 OS=Sus scrofa OX=9823 GN=SERPINB5 PE=3 SV=1;tr|A0A4X1TPX3|A0A4X1TPX3_PIG SERPIN domain-containing protein OS=Sus scrofa OX=9823 GN=SERPINB5 PE=3 SV=1	2	1	3.2	42.131	375	0.63647	0.11758	1	0	0	0	0	0	0	0	0	0	813900	416860	527370	0	0	0
A0A5G2QBE8	Serotransferrin	tr|A0A5G2QBE8|A0A5G2QBE8_PIG Serotransferrin OS=Sus scrofa OX=9823 GN=TF PE=3 SV=1;tr|A0A5G2RLB1|A0A5G2RLB1_PIG Serotransferrin OS=Sus scrofa OX=9823 GN=TF PE=3 SV=1;sp|Q29545|ICA_PIG Inhibitor of carbonic anhydrase OS=Sus scrofa OX=9823 GN=ICA PE=1 SV=1;t	6	1	1.8	75.198	684	0.43012	0.36991	1	0	0	0	0	0	0	0	0	0	0	0	0	92633	16146	29381
F1SQ45	Serine/threonine/tyrosine kinase 1	tr|F1SQ45|F1SQ45_PIG Serine/threonine/tyrosine kinase 1 OS=Sus scrofa OX=9823 GN=STYK1 PE=4 SV=3	1	1	3.1	47.51	424	0.53265	0.25487	1	201010	283083	166570	0	0	0	0	0	0	0	0	0	0	0	0
A0A480TTU6	Serine/threonine-protein phosphatase 6 regulatory subunit 1	tr|A0A480TTU6|A0A480TTU6_PIG Serine/threonine-protein phosphatase 6 regulatory subunit 1 OS=Sus scrofa OX=9823 PE=3 SV=1;tr|A0A480TRN1|A0A480TRN1_PIG Serine/threonine-protein phosphatase 6 regulatory subunit 1 OS=Sus scrofa OX=9823 PE=3 SV=1;tr|A0A480MT03|	3	1	1.1	70.879	656	0.51137	0.27628	1	0	0	0	0	0	0	90744	92024	86427	0	0	0	0	0	0
A0A480XYB9	Serine/threonine-protein phosphatase 4 regulatory subunit 1 isoform X3	tr|A0A480XYB9|A0A480XYB9_PIG Serine/threonine-protein phosphatase 4 regulatory subunit 1 isoform X3 OS=Sus scrofa OX=9823 PE=4 SV=1	1	2	2	81.954	739	0.1821	0.70921	2	0	0	0	0	0	0	0	0	0	35760	33316	69887	0	0	0
A0A5G2QGH9	Serine/threonine-protein phosphatase 2A 65 kDa regulatory subunit A alpha isoform	tr|A0A5G2QGH9|A0A5G2QGH9_PIG Serine/threonine-protein phosphatase 2A 65 kDa regulatory subunit A alpha isoform OS=Sus scrofa OX=9823 GN=PPP2R1A PE=4 SV=1;tr|A0A480F350|A0A480F350_PIG Serine/threonine-protein phosphatase 2A 65 kDa regulatory subunit A alpha	9	4	8.3	61.475	554	0.001992	4.9473	37	81833	179080	116556	161010	80499	44595	123620	174843	145620	113160	172721	176970	135170	92505	136333
F1RQR5	Serine/threonine-protein phosphatase 2A 56 kDa regulatory subunit	tr|F1RQR5|F1RQR5_PIG Serine/threonine-protein phosphatase 2A 56 kDa regulatory subunit OS=Sus scrofa OX=9823 GN=PPP2R5B PE=3 SV=1;tr|A0A4X1V1A1|A0A4X1V1A1_PIG Serine/threonine-protein phosphatase 2A 56 kDa regulatory subunit OS=Sus scrofa OX=9823 GN=PPP2R5	2	1	1.8	57.342	497	0.60373	0.17907	1	0	0	0	50785	14448	30164	0	0	0	0	0	0	0	0	0
A0A4X1W704	Serine/threonine-protein phosphatase 2A 56 kDa regulatory subunit	tr|A0A4X1W704|A0A4X1W704_PIG Serine/threonine-protein phosphatase 2A 56 kDa regulatory subunit OS=Sus scrofa OX=9823 PE=3 SV=1;tr|I3LGC0|I3LGC0_PIG Serine/threonine-protein phosphatase 2A 56 kDa regulatory subunit OS=Sus scrofa OX=9823 GN=PPP2R5E PE=1 SV=2	10	2	6.6	51.359	438	0.54274	0.24222	2	0	0	0	28302	149540	30037	0	0	0	0	0	0	0	0	0
A0A287BPB7	Serine/threonine-protein phosphatase 2A 55 kDa regulatory subunit B	tr|A0A287BPB7|A0A287BPB7_PIG Serine/threonine-protein phosphatase 2A 55 kDa regulatory subunit B OS=Sus scrofa OX=9823 GN=PPP2R2A PE=3 SV=2;tr|A0A4X1VCH2|A0A4X1VCH2_PIG Serine/threonine-protein phosphatase 2A 55 kDa regulatory subunit B OS=Sus scrofa OX=98	7	2	5.9	50.965	441	0.099835	0.94445	7	0	0	0	30814	43871	45707	38726	46979	56857	126890	37529	115190	0	0	0
A0A480N8P6	Serine/threonine-protein phosphatase 1 regulatory subunit 10 isoform X1	tr|A0A480N8P6|A0A480N8P6_PIG Serine/threonine-protein phosphatase 1 regulatory subunit 10 isoform X1 OS=Sus scrofa OX=9823 PE=4 SV=1;tr|A0A480T7Z5|A0A480T7Z5_PIG MHC class I region proline-rich protein CAT53 OS=Sus scrofa OX=9823 PE=4 SV=1;tr|A0A4X1VI93|A0	5	2	3.4	73.025	667	0.099671	0.94384	2	0	0	0	0	0	0	0	0	0	49431	66071	13248	0	0	0
A0A480QI80	Serine/threonine-protein phosphatase (Fragment)	tr|A0A480QI80|A0A480QI80_PIG Serine/threonine-protein phosphatase (Fragment) OS=Sus scrofa OX=9823 PE=3 SV=1;tr|A0A5G2R6Q5|A0A5G2R6Q5_PIG Serine/threonine-protein phosphatase OS=Sus scrofa OX=9823 GN=PPP2CB PE=3 SV=1	2	2	4.2	47.562	433	0.43148	0.36796	2	310364	168470	1917300	49047	73237	96901	0	0	0	0	0	0	0	0	0
A0A5G2Q9X3	Serine/threonine-protein phosphatase	tr|A0A5G2Q9X3|A0A5G2Q9X3_PIG Serine/threonine-protein phosphatase OS=Sus scrofa OX=9823 GN=PPP1CA PE=1 SV=1;tr|A0A4X1T5Z9|A0A4X1T5Z9_PIG Serine/threonine-protein phosphatase OS=Sus scrofa OX=9823 GN=PPP1CA PE=3 SV=1;tr|Q2EHH8|Q2EHH8_PIG Serine/threonine-pr	14	2	9.8	32.595	286	0.0055021	2.0173	19	308510	229310	311037	149170	192390	294530	185490	151550	347620	252528	154350	233560	52265	94683	50381
A0A4X1VP50	Serine/threonine-protein kinase receptor	tr|A0A4X1VP50|A0A4X1VP50_PIG Serine/threonine-protein kinase receptor OS=Sus scrofa OX=9823 GN=ACVR1 PE=3 SV=1;tr|A0A287B7B4|A0A287B7B4_PIG Serine/threonine-protein kinase receptor OS=Sus scrofa OX=9823 GN=ACVR1 PE=3 SV=1	2	1	5.7	58.958	524	0.35495	0.44786	1	61892	19242	5307.9	0	0	0	0	0	0	0	0	0	0	0	0
A0A4X1UWP2	Serine/threonine-protein kinase PLK	tr|A0A4X1UWP2|A0A4X1UWP2_PIG Serine/threonine-protein kinase PLK OS=Sus scrofa OX=9823 PE=3 SV=1;tr|I3LII4|I3LII4_PIG Serine/threonine-protein kinase PLK OS=Sus scrofa OX=9823 GN=PLK1 PE=3 SV=3;tr|A0A4X1UYN5|A0A4X1UYN5_PIG Serine/threonine-protein kinase P	3	2	2	62.39	552	0.28163	0.5887	2	44345	35166	16387	0	0	0	876240	686040	166320	0	0	0	0	0	0
A0A480WX21	Serine/threonine-protein kinase Nek2 isoform 1	tr|A0A480WX21|A0A480WX21_PIG Serine/threonine-protein kinase Nek2 isoform 1 OS=Sus scrofa OX=9823 PE=4 SV=1;tr|F1S2U5|F1S2U5_PIG NIMA related kinase 2 OS=Sus scrofa OX=9823 GN=NEK2 PE=4 SV=3;tr|A0A4X1TGQ4|A0A4X1TGQ4_PIG Protein kinase domain-containing pro	11	1	4.5	41.39	359	0.6477	0.095286	1	96754	122140	332039	0	0	0	0	0	0	0	0	0	0	0	0
A0A480NGZ4	Serine/threonine-protein kinase MARK1 isoform X2	tr|A0A480NGZ4|A0A480NGZ4_PIG Serine/threonine-protein kinase MARK1 isoform X2 OS=Sus scrofa OX=9823 PE=4 SV=1;tr|A0A4X1TRY2|A0A4X1TRY2_PIG Non-specific serine/threonine protein kinase OS=Sus scrofa OX=9823 GN=MARK3 PE=3 SV=1;tr|I3L7Z9|I3L7Z9_PIG Non-specif	37	1	2.6	60.771	540	0.45218	0.34042	1	0	0	0	0	0	0	0	0	0	57470	37358	49408	0	0	0
A0A480SUT8	Serine/threonine-protein kinase LATS1 isoform X2	tr|A0A480SUT8|A0A480SUT8_PIG Serine/threonine-protein kinase LATS1 isoform X2 OS=Sus scrofa OX=9823 PE=4 SV=1;tr|A0A480JK38|A0A480JK38_PIG Serine/threonine-protein kinase LATS1 OS=Sus scrofa OX=9823 PE=4 SV=1;tr|A0A480Y6A1|A0A480Y6A1_PIG Serine/threonine-p	7	2	2.9	75.877	687	0.13498	0.82339	2	0	0	0	372860	20293	16958	238260	1180900	419630	0	0	0	0	0	0
A0A480TP76	Serine/threonine-protein kinase Chk2 isoform X2	tr|A0A480TP76|A0A480TP76_PIG Serine/threonine-protein kinase Chk2 isoform X2 OS=Sus scrofa OX=9823 PE=4 SV=1	1	1	6.1	33.137	295	0.64023	0.10415	1	120960	12903	203630	0	0	0	0	0	0	0	0	0	0	0	0
A0A4X1USN1	Serine/threonine-protein kinase	tr|A0A4X1USN1|A0A4X1USN1_PIG Serine/threonine-protein kinase OS=Sus scrofa OX=9823 GN=PIM3 PE=3 SV=1;tr|A0A5G2QBD2|A0A5G2QBD2_PIG Pim-3 proto-oncogene, serine/threonine kinase OS=Sus scrofa OX=9823 GN=PIM3 PE=3 SV=1;tr|A0A287B3S7|A0A287B3S7_PIG Serine/thre	3	1	3.1	36.131	327	0.446	0.34424	1	0	0	0	0	0	0	93048	85755	38237	0	0	0	0	0	0
A0A5G2QT04	Serine/threonine kinase 32B	tr|A0A5G2QT04|A0A5G2QT04_PIG Serine/threonine kinase 32B OS=Sus scrofa OX=9823 GN=STK32B PE=4 SV=1;tr|A0A4X1SJT9|A0A4X1SJT9_PIG Protein kinase domain-containing protein OS=Sus scrofa OX=9823 GN=STK32B PE=4 SV=1;tr|A0A4X1T1N3|A0A4X1T1N3_PIG Protein kinase d	11	1	3.3	38.915	337	0.47462	0.31444	1	0	0	0	0	0	0	54594	59587	46033	0	0	0	0	0	0
F1ST91	Serine/threonine kinase 31	tr|F1ST91|F1ST91_PIG Serine/threonine kinase 31 OS=Sus scrofa OX=9823 GN=STK31 PE=4 SV=3	1	1	0.9	111.82	983	0.65043	0.088367	1	0	0	0	3045300	366390	23350	0	0	0	0	0	0	0	0	0
F1SIN8	Serine/threonine kinase 25	tr|F1SIN8|F1SIN8_PIG Serine/threonine kinase 25 OS=Sus scrofa OX=9823 GN=STK25 PE=4 SV=2;tr|A0A4X1SX80|A0A4X1SX80_PIG Protein kinase domain-containing protein OS=Sus scrofa OX=9823 GN=STK25 PE=4 SV=1	2	1	2.5	53.509	476	0.47629	0.31341	1	0	0	0	0	0	0	0	0	0	444840	205740	229470	0	0	0
A0A5G2QR71	Serine/threonine kinase 24	tr|A0A5G2QR71|A0A5G2QR71_PIG Serine/threonine kinase 24 OS=Sus scrofa OX=9823 GN=STK24 PE=1 SV=1	1	1	1.9	47.815	429	0.65457	0.066697	1	0	0	0	203910	799020	685990	0	0	0	0	0	0	0	0	0
A0A480TW29	Serine/arginine-rich splicing factor 2 (Fragment)	tr|A0A480TW29|A0A480TW29_PIG Serine/arginine-rich splicing factor 2 (Fragment) OS=Sus scrofa OX=9823 PE=3 SV=1;tr|A0A480TYR8|A0A480TYR8_PIG Serine/arginine-rich splicing factor 2 (Fragment) OS=Sus scrofa OX=9823 PE=3 SV=1;sp|Q06A98|SRSF2_PIG Serine/arginin	5	5	24.2	24.454	211	0.002551	11.394	32	0	0	0	519570	841630	524000	628210	915080	377510	181910	249100	437483	0	0	0
A0A5S6GJG2	Serine/arginine-rich splicing factor 1	tr|A0A5S6GJG2|A0A5S6GJG2_PIG Serine/arginine-rich splicing factor 1 OS=Sus scrofa OX=9823 GN=SRSF1 PE=1 SV=1;tr|A0A4X1SKM9|A0A4X1SKM9_PIG Serine/arginine-rich splicing factor 1 OS=Sus scrofa OX=9823 GN=SRSF1 PE=3 SV=1;sp|Q3YLA6|SRSF1_PIG Serine/arginine-ri	6	10	43.6	26.906	236	0	323.31	205	11074	15989	18580	588980	474180	375980	442290	456760	541300	793760	494690	825330	139210	180510	97763
A0A287ADD0	Serine/arginine repetitive matrix 2	tr|A0A287ADD0|A0A287ADD0_PIG Serine/arginine repetitive matrix 2 OS=Sus scrofa OX=9823 GN=SRRM2 PE=1 SV=1;tr|I3LCW3|I3LCW3_PIG Serine/arginine repetitive matrix 2 OS=Sus scrofa OX=9823 GN=SRRM2 PE=1 SV=2;tr|A0A4X1VNZ0|A0A4X1VNZ0_PIG CTD domain-containing p	8	10	5.8	272.6	2505	0.0025575	11.64	39	242270	150460	301710	149220	96282	230380	159710	137100	124470	332650	257830	260400	727800	260900	414010
A0A287AN21	Serine-protein kinase ATM	tr|A0A287AN21|A0A287AN21_PIG Serine-protein kinase ATM OS=Sus scrofa OX=9823 GN=ATM PE=3 SV=1;sp|Q6PQD5|ATM_PIG Serine-protein kinase ATM OS=Sus scrofa OX=9823 GN=ATM PE=3 SV=2;tr|F1SV20|F1SV20_PIG Serine-protein kinase ATM OS=Sus scrofa OX=9823 GN=ATM PE=	5	3	1.3	343.86	2998	0.25788	0.62888	3	213460	89502	196140	4338.1	67992	3479.8	0	0	0	0	0	0	0	0	0
A0A480NWB3	Serine--tRNA ligase, mitochondrial	tr|A0A480NWB3|A0A480NWB3_PIG Serine--tRNA ligase, mitochondrial OS=Sus scrofa OX=9823 PE=3 SV=1;tr|A0A4X1SZH3|A0A4X1SZH3_PIG Seryl-tRNA synthetase OS=Sus scrofa OX=9823 PE=3 SV=1;tr|A0A480SUM8|A0A480SUM8_PIG Seryl-tRNA synthetase OS=Sus scrofa OX=9823 PE=3	7	1	2.1	38.286	338	0.51037	0.27628	1	16278	60756	3673.9	0	0	0	0	0	0	0	0	0	0	0	0
A0A4X1T0Q5	Serine protease inhibitor Kazal-type 1	tr|A0A4X1T0Q5|A0A4X1T0Q5_PIG Serine protease inhibitor Kazal-type 1 OS=Sus scrofa OX=9823 GN=SPINK1 PE=4 SV=1;tr|A0A4X1T366|A0A4X1T366_PIG Serine protease inhibitor Kazal-type 1 OS=Sus scrofa OX=9823 GN=SPINK1 PE=4 SV=1;tr|A0A287BPH0|A0A287BPH0_PIG Serine	3	1	33.8	6.8938	65	0.63747	0.111	1	0	0	0	160530	39594	27590	0	0	0	0	0	0	0	0	0
I3LJB4	Serine protease 16	tr|I3LJB4|I3LJB4_PIG Serine protease 16 OS=Sus scrofa OX=9823 GN=PRSS16 PE=4 SV=3;tr|A0A4X1VHQ4|A0A4X1VHQ4_PIG Uncharacterized protein OS=Sus scrofa OX=9823 GN=PRSS16 PE=4 SV=1;tr|A0A4X1VKG0|A0A4X1VKG0_PIG Uncharacterized protein OS=Sus scrofa OX=9823 GN=P	4	1	3.1	27.794	257	0.65228	0.08126	1	0	0	0	0	0	0	52783	121100	391700	0	0	0	0	0	0
F1SBJ7	Serine palmitoyltransferase 3	tr|F1SBJ7|F1SBJ7_PIG Serine palmitoyltransferase 3 OS=Sus scrofa OX=9823 GN=SPTLC3 PE=3 SV=2;tr|A0A4X1UR31|A0A4X1UR31_PIG Aminotran_1_2 domain-containing protein OS=Sus scrofa OX=9823 GN=SPTLC3 PE=3 SV=1	2	1	5.8	61.51	548	0.0018622	4.0383	1	0	0	0	0	0	0	0	0	0	0	0	0	770100	958810	515660
A0A5G2R9A2	Serine hydroxymethyltransferase	tr|A0A5G2R9A2|A0A5G2R9A2_PIG Serine hydroxymethyltransferase OS=Sus scrofa OX=9823 GN=SHMT2 PE=1 SV=1;tr|A0A5G2R6D0|A0A5G2R6D0_PIG Serine hydroxymethyltransferase OS=Sus scrofa OX=9823 GN=SHMT2 PE=1 SV=1;tr|A0A4X1W7Z5|A0A4X1W7Z5_PIG Serine hydroxymethyltra	5	5	13.8	53.151	477	0.0022026	6.8134	41	208640	272730	243857	253310	159860	275340	221150	213140	130900	117710	164257	189810	0	0	0
A0A5G2RDD9	Serine and arginine rich splicing factor 7	tr|A0A5G2RDD9|A0A5G2RDD9_PIG Serine and arginine rich splicing factor 7 OS=Sus scrofa OX=9823 GN=SRSF7 PE=1 SV=1;tr|A0A4X1SXL8|A0A4X1SXL8_PIG Uncharacterized protein OS=Sus scrofa OX=9823 GN=SRSF7 PE=4 SV=1;tr|A0A287B8X4|A0A287B8X4_PIG Serine and arginine	10	3	35.9	15.09	131	0	25.384	21	0	0	0	652560	562480	611100	569390	577140	308480	382980	473846	701550	0	0	0
F1RY92	Serine and arginine rich splicing factor 3	tr|F1RY92|F1RY92_PIG Serine and arginine rich splicing factor 3 OS=Sus scrofa OX=9823 GN=SRSF3 PE=1 SV=2;tr|A0A4X1SUA0|A0A4X1SUA0_PIG RRM domain-containing protein OS=Sus scrofa OX=9823 GN=SRSF3 PE=4 SV=1	2	6	44.5	19.329	164	0	60.834	97	372670	326930	210308	2816200	3244400	4238600	1685200	3546600	1544800	869060	1346500	670200	177860	422170	286060
A0A287B770	Serine and arginine rich splicing factor 10	tr|A0A287B770|A0A287B770_PIG Serine and arginine rich splicing factor 10 OS=Sus scrofa OX=9823 GN=SRSF10 PE=1 SV=2;tr|F8TEL6|F8TEL6_PIG Serine/arginine-rich splicing factor 10 isoform 2 OS=Sus scrofa OX=9823 GN=SRSF10 PE=2 SV=1;tr|A0A4X1VZI0|A0A4X1VZI0_PIG	8	2	10.7	31.213	261	0.027778	1.4455	8	0	0	0	101170	109760	90030	133700	120620	205190	0	0	0	0	0	0
F1S445	Sequestosome 1	tr|F1S445|F1S445_PIG Sequestosome 1 OS=Sus scrofa OX=9823 GN=SQSTM1 PE=4 SV=3;tr|A0A4X1VQI8|A0A4X1VQI8_PIG Uncharacterized protein OS=Sus scrofa OX=9823 GN=SQSTM1 PE=4 SV=1;tr|A0A4X1VW41|A0A4X1VW41_PIG Uncharacterized protein OS=Sus scrofa OX=9823 GN=SQSTM	10	3	18.1	40.896	376	0.0056338	2.13	8	548260	453057	503675	263280	245580	255830	255790	202610	521210	0	0	0	0	0	0
A0A4X1USF2	Septin-type G domain-containing protein	tr|A0A4X1USF2|A0A4X1USF2_PIG Septin-type G domain-containing protein OS=Sus scrofa OX=9823 GN=SEPTIN9 PE=3 SV=1;tr|A0A480Y1E4|A0A480Y1E4_PIG Septin-9 isoform b (Fragment) OS=Sus scrofa OX=9823 PE=4 SV=1	2	6	22.4	38.452	335	0.47743	0.31008	1	155700	210036	72690	187990	403510	275310	0	0	0	1513200	1127200	1624900	11912	64027	34527
A0A480XM87	Septin-9 isoform c	tr|A0A480XM87|A0A480XM87_PIG Septin-9 isoform c OS=Sus scrofa OX=9823 PE=3 SV=1;tr|A0A480R3V0|A0A480R3V0_PIG Septin-9 OS=Sus scrofa OX=9823 PE=3 SV=1;tr|A0A480QRL3|A0A480QRL3_PIG Septin-9 OS=Sus scrofa OX=9823 PE=3 SV=1;tr|A0A480IHR8|A0A480IHR8_PIG Septin-	14	9	22.6	63.454	567	0.60497	0.17807	1	0	0	0	20586	34865	8132.9	0	0	0	0	0	0	0	0	0
F1RJU9	Septin-8	tr|F1RJU9|F1RJU9_PIG Septin-8 OS=Sus scrofa OX=9823 GN=SEPTIN8 PE=1 SV=4;tr|A0A5G2RND3|A0A5G2RND3_PIG Septin-8 OS=Sus scrofa OX=9823 GN=SEPTIN8 PE=1 SV=1;tr|A0A4X1UTK5|A0A4X1UTK5_PIG Septin-8 OS=Sus scrofa OX=9823 GN=SEPTIN8 PE=3 SV=1;tr|A0A4X1UX86|A0A4X1U	8	1	2.1	49.413	426	0.4762	0.31288	2	76592	32940	20503	0	0	0	0	0	0	0	0	0	0	0	0
A0A4X1W830	Septin-7	tr|A0A4X1W830|A0A4X1W830_PIG Septin-7 OS=Sus scrofa OX=9823 GN=SEPTIN7 PE=3 SV=1;tr|F1SIK9|F1SIK9_PIG Septin-7 OS=Sus scrofa OX=9823 GN=SEPTIN7 PE=1 SV=3;tr|A0A5G2RDA8|A0A5G2RDA8_PIG Septin-7 OS=Sus scrofa OX=9823 GN=SEPTIN7 PE=1 SV=1;tr|A0A4X1W0X6|A0A4X1W	17	5	19.3	44.842	384	0.0018051	3.7161	20	103946	201760	89303	313340	247100	231610	384650	261080	305010	0	0	0	260480	300979	445550
A0A4X1SY74	Septin-2	tr|A0A4X1SY74|A0A4X1SY74_PIG Septin-2 OS=Sus scrofa OX=9823 GN=SEPTIN2 PE=3 SV=1;tr|F1SIP0|F1SIP0_PIG Septin-2 OS=Sus scrofa OX=9823 GN=SEPTIN2 PE=1 SV=3;tr|A0A4X1SZY0|A0A4X1SZY0_PIG Septin-2 OS=Sus scrofa OX=9823 GN=SEPTIN2 PE=3 SV=1;tr|A0A4X1T0C5|A0A4X1T	8	3	15.8	40.619	354	0.0046083	2.596	28	140390	94182	121037	170060	177130	155900	157310	118140	323930	102150	239203	266740	0	0	0
A0A5G2QRA0	Septin 9	tr|A0A5G2QRA0|A0A5G2QRA0_PIG Septin 9 OS=Sus scrofa OX=9823 GN=SEPTIN9 PE=1 SV=1	1	9	24.7	63.08	566	0	44.899	43	272420	92822	345480	221900	188860	348920	139030	167010	164820	225440	147050	248894	0	0	0
F1RYS5	Septin 11	tr|F1RYS5|F1RYS5_PIG Septin 11 OS=Sus scrofa OX=9823 GN=SEPTIN11 PE=1 SV=3;tr|A0A4X1SW97|A0A4X1SW97_PIG Septin-type G domain-containing protein OS=Sus scrofa OX=9823 GN=SEPTIN11 PE=3 SV=1;tr|A0A287AFS4|A0A287AFS4_PIG Septin 11 OS=Sus scrofa OX=9823 GN=SEPT	13	2	5.4	48.978	425	0.0087391	1.7399	22	176290	104980	231690	141710	260050	180860	126640	130117	194550	123360	128790	256810	146760	143974	180960
F1SLF0	Sepiapterin reductase	tr|F1SLF0|F1SLF0_PIG Sepiapterin reductase OS=Sus scrofa OX=9823 GN=SPR PE=1 SV=3;tr|A0A4X1W296|A0A4X1W296_PIG Sepiapterin reductase OS=Sus scrofa OX=9823 GN=SPR PE=3 SV=1;tr|A0A4X1W9A7|A0A4X1W9A7_PIG Sepiapterin reductase OS=Sus scrofa OX=9823 GN=SPR PE=3	6	10	50.2	28.563	265	0	31.821	71	74879	44389	22640	844620	658940	1112760	335020	425570	474630	243200	119240	153190	70527	81941	149710
A0A480V1X1	Sentrin-specific protease 7 isoform X10	tr|A0A480V1X1|A0A480V1X1_PIG Sentrin-specific protease 7 isoform X10 OS=Sus scrofa OX=9823 PE=4 SV=1;tr|A0A480KSV8|A0A480KSV8_PIG Sentrin-specific protease 7 isoform X10 OS=Sus scrofa OX=9823 PE=4 SV=1;tr|A0A4X1UZY4|A0A4X1UZY4_PIG ULP_PROTEASE domain-conta	12	1	2.8	71.733	638	0.66073	0.024662	1	0	0	0	0	0	0	289760	1454000	510950	0	0	0	0	0	0
P00999	Seminal plasma acrosin inhibitor A1	sp|P00999|IACA_PIG Seminal plasma acrosin inhibitor A1 OS=Sus scrofa OX=9823 PE=1 SV=1	1	1	16.9	7.5945	65	0.58039	0.20635	1	50744	54954	26001	0	0	0	0	0	0	0	0	0	0	0	0
A0A480JGS2	Semaphorin-4F isoform X5 (Fragment)	tr|A0A480JGS2|A0A480JGS2_PIG Semaphorin-4F isoform X5 (Fragment) OS=Sus scrofa OX=9823 PE=4 SV=1;tr|F1SNW1|F1SNW1_PIG Ssemaphorin 4F OS=Sus scrofa OX=9823 GN=SEMA4F PE=4 SV=2;tr|A0A4X1W5Z0|A0A4X1W5Z0_PIG Sema domain-containing protein OS=Sus scrofa OX=9823	7	1	2.1	66.881	609	0.37223	0.43107	1	0	0	0	0	0	0	0	0	0	3585.4	16574	63870	0	0	0
A0A5G2QQM0	Semaphorin 6D	tr|A0A5G2QQM0|A0A5G2QQM0_PIG Semaphorin 6D OS=Sus scrofa OX=9823 GN=SEMA6D PE=4 SV=1;tr|A0A4X1SFM6|A0A4X1SFM6_PIG Sema domain-containing protein OS=Sus scrofa OX=9823 GN=SEMA6D PE=4 SV=1;tr|A0A4X1SFU2|A0A4X1SFU2_PIG Sema domain-containing protein OS=Sus sc	12	1	2	105.94	949	0.060207	1.1173	1	0	0	0	444360	27087	36588	0	0	0	0	0	0	0	0	0
A0A5G2QWK4	Semaphorin 5A	tr|A0A5G2QWK4|A0A5G2QWK4_PIG Semaphorin 5A OS=Sus scrofa OX=9823 GN=SEMA5A PE=4 SV=1;tr|A0A480WS94|A0A480WS94_PIG Semaphorin-5A OS=Sus scrofa OX=9823 PE=4 SV=1;tr|A0A480I469|A0A480I469_PIG Semaphorin-5A OS=Sus scrofa OX=9823 PE=4 SV=1;tr|A0A4X1TP30|A0A4X1T	7	1	3.9	48.534	431	0.59379	0.19099	1	0	0	0	0	0	0	0	0	0	82132	104020	202090	0	0	0
K7GQK8	Semaphorin 4D	tr|K7GQK8|K7GQK8_PIG Semaphorin 4D OS=Sus scrofa OX=9823 GN=SEMA4D PE=1 SV=9;tr|A0A4X1SFM9|A0A4X1SFM9_PIG Uncharacterized protein OS=Sus scrofa OX=9823 PE=3 SV=1;tr|K7GSK3|K7GSK3_PIG Semaphorin 4D OS=Sus scrofa OX=9823 GN=SEMA4D PE=1 SV=2;tr|A0A5K1TV70|A0A	6	1	1.3	76.909	698	0.65422	0.072546	1	0	0	0	137310	48212	211950	0	0	0	0	0	0	0	0	0
F1STD1	Semaphorin 4C	tr|F1STD1|F1STD1_PIG Semaphorin 4C OS=Sus scrofa OX=9823 GN=SEMA4C PE=3 SV=3;tr|A0A4X1VYH6|A0A4X1VYH6_PIG Uncharacterized protein OS=Sus scrofa OX=9823 GN=SEMA4C PE=3 SV=1;tr|A0A480TXN8|A0A480TXN8_PIG Semaphorin-4C isoform X2 OS=Sus scrofa OX=9823 PE=3 SV=	6	1	1.3	91.553	825	0.54773	0.23809	1	0	0	0	292530	14706	39562	0	0	0	0	0	0	0	0	0
A0A4X1UJF3	Sema domain-containing protein	tr|A0A4X1UJF3|A0A4X1UJF3_PIG Sema domain-containing protein OS=Sus scrofa OX=9823 GN=PLXNB2 PE=3 SV=1;tr|A0A4X1ULG5|A0A4X1ULG5_PIG Sema domain-containing protein OS=Sus scrofa OX=9823 GN=PLXNB2 PE=3 SV=1;tr|A0A287BLW6|A0A287BLW6_PIG Plexin-B2 isoform X2 OS	4	5	3.5	202.08	1815	0.002809	14.56	31	172260	121490	144389	59906	54259	107780	41544	48390	15600	141800	211460	257010	279410	169750	148270
Q95KL4	Selenoprotein W	sp|Q95KL4|SELW_PIG Selenoprotein W OS=Sus scrofa OX=9823 GN=SELENOW PE=3 SV=4	1	1	18.4	9.3447	87	0.27207	0.60348	5	3613000	4056483	3004755	992043	1296900	1804854	1215200	975500	1343130	0	0	0	985560	1344100	1153190
I3L5E9	Selenoprotein I	tr|I3L5E9|I3L5E9_PIG Selenoprotein I OS=Sus scrofa OX=9823 GN=SELENOI PE=1 SV=3;tr|A0A4X1TQ02|A0A4X1TQ02_PIG Uncharacterized protein OS=Sus scrofa OX=9823 PE=3 SV=1	2	1	5	43.623	383	0.44535	0.34533	1	89435	121040	302743	0	0	0	0	0	0	0	0	0	0	0	0
A0A480HB23	Selenocysteine lyase isoform X1	tr|A0A480HB23|A0A480HB23_PIG Selenocysteine lyase isoform X1 OS=Sus scrofa OX=9823 PE=4 SV=1	1	2	4.9	43.396	409	0.0055249	2.0239	8	0	0	0	30283241	26072000	32894473	9125500	12839455	8594403	21865000	26339000	19120000	15263000	14234000	19929000
A0A5G2QT34	Selenium binding protein 1	tr|A0A5G2QT34|A0A5G2QT34_PIG Selenium binding protein 1 OS=Sus scrofa OX=9823 GN=SELENBP1 PE=1 SV=1;tr|F1ST01|F1ST01_PIG Selenium binding protein 1 OS=Sus scrofa OX=9823 GN=SELENBP1 PE=1 SV=2	2	1	1.6	55.403	500	0.65886	0.050774	1	0	0	0	94641	28076	31996	0	0	0	0	0	0	0	0	0
A0A5G2QLL0	Selenide, water dikinase	tr|A0A5G2QLL0|A0A5G2QLL0_PIG Selenide, water dikinase OS=Sus scrofa OX=9823 GN=SEPHS1 PE=1 SV=1;tr|A0A4X1VY16|A0A4X1VY16_PIG Selenide, water dikinase OS=Sus scrofa OX=9823 GN=SEPHS1 PE=4 SV=1;tr|A0A5G2RIL0|A0A5G2RIL0_PIG Selenide, water dikinase OS=Sus scr	7	1	4.7	35.463	321	0.41321	0.39082	2	48876	77757	48876	18680	38820	41023	0	0	0	0	0	0	0	0	0
A0A4X1TRL2	Secretory carrier-associated membrane protein	tr|A0A4X1TRL2|A0A4X1TRL2_PIG Secretory carrier-associated membrane protein OS=Sus scrofa OX=9823 GN=SCAMP2 PE=3 SV=1;tr|A0A287A4D2|A0A287A4D2_PIG Secretory carrier-associated membrane protein OS=Sus scrofa OX=9823 GN=SCAMP2 PE=1 SV=1;tr|F1SJ46|F1SJ46_PIG S	8	1	4	30.976	272	0.34712	0.45891	1	796056	339090	443845	0	0	0	0	0	0	0	0	0	0	0	0
A0A5G2QWI8	Secretogranin-1	tr|A0A5G2QWI8|A0A5G2QWI8_PIG Secretogranin-1 OS=Sus scrofa OX=9823 GN=CHGB PE=3 SV=1;tr|A0A286ZQZ7|A0A286ZQZ7_PIG Secretogranin-1 OS=Sus scrofa OX=9823 GN=CHGB PE=3 SV=1;tr|A0A4X1UDH3|A0A4X1UDH3_PIG Secretogranin-1 OS=Sus scrofa OX=9823 GN=CHGB PE=3 SV=1;s	5	1	1.8	69.934	625	0.43074	0.36884	1	0	0	0	0	0	0	0	0	0	17243	31860	47591	0	0	0
A0A5G2QNQ6	Secretogranin III	tr|A0A5G2QNQ6|A0A5G2QNQ6_PIG Secretogranin III OS=Sus scrofa OX=9823 GN=SCG3 PE=1 SV=1;tr|F1RYP7|F1RYP7_PIG Secretogranin III OS=Sus scrofa OX=9823 GN=SCG3 PE=1 SV=3;tr|A0A4X1T393|A0A4X1T393_PIG Secretogranin III OS=Sus scrofa OX=9823 PE=4 SV=1;tr|A0A4X1T1	5	1	2.5	49.468	436	0.44719	0.34387	1	0	0	0	0	0	0	0	0	0	0	0	0	279100	163010	123830
A0A287AWB0	Secreted and transmembrane 1	tr|A0A287AWB0|A0A287AWB0_PIG Secreted and transmembrane 1 OS=Sus scrofa OX=9823 GN=SECTM1 PE=4 SV=1;tr|A0A4X1U781|A0A4X1U781_PIG Uncharacterized protein OS=Sus scrofa OX=9823 PE=4 SV=1;tr|A0A286ZX32|A0A286ZX32_PIG Secreted and transmembrane 1 OS=Sus scrofa	3	1	5.3	24.433	226	0.19586	0.65657	0	328353	172610	2540854	0	0	0	0	0	0	0	0	0	0	0	0
I3LT80	SECIS binding protein 2	tr|I3LT80|I3LT80_PIG SECIS binding protein 2 OS=Sus scrofa OX=9823 GN=SECISBP2 PE=4 SV=2;tr|A0A4X1SFC1|A0A4X1SFC1_PIG Ribosomal_L7Ae domain-containing protein OS=Sus scrofa OX=9823 GN=SECISBP2 PE=4 SV=1;tr|A0A480JI97|A0A480JI97_PIG Selenocysteine insertion	8	2	2.7	90.735	818	0.5501	0.2329	2	0	0	0	195530	445830	403770	89507	129880	493550	0	0	0	0	0	0
A0A480HK81	Secernin-2	tr|A0A480HK81|A0A480HK81_PIG Secernin-2 OS=Sus scrofa OX=9823 PE=4 SV=1	1	1	6.7	19.621	180	0.53239	0.25462	1	0	0	0	0	0	0	0	0	0	19898	50399	96963	0	0	0
A0A4X1UV96	SEC7 domain-containing protein	tr|A0A4X1UV96|A0A4X1UV96_PIG SEC7 domain-containing protein OS=Sus scrofa OX=9823 GN=ARFGEF1 PE=4 SV=1;tr|A0A480YYW9|A0A480YYW9_PIG Brefeldin A-inhibited guanine nucleotide-exchange protein 1 isoform X1 OS=Sus scrofa OX=9823 PE=4 SV=1;tr|A0A480X862|A0A480X	7	2	1.6	187.82	1661	0.18475	0.69569	2	0	0	0	505130	443210	218500	0	0	0	531420	392743	463700	0	0	0
A0A4X1VGS9	Sec2p domain-containing protein	tr|A0A4X1VGS9|A0A4X1VGS9_PIG Sec2p domain-containing protein OS=Sus scrofa OX=9823 PE=4 SV=1;tr|A0A287AVE2|A0A287AVE2_PIG RAB3A interacting protein like 1 OS=Sus scrofa OX=9823 GN=RAB3IL1 PE=4 SV=2;tr|A0A287B6H7|A0A287B6H7_PIG RAB3A interacting protein lik	4	1	4.3	38.991	349	0.32765	0.49525	1	170220	1237060	87865	0	0	0	0	0	0	0	0	0	0	0	0
A0A5G2RK54	SEC24 homolog C, COPII coat complex component	tr|A0A5G2RK54|A0A5G2RK54_PIG SEC24 homolog C, COPII coat complex component OS=Sus scrofa OX=9823 GN=SEC24C PE=1 SV=1;tr|A0A4X1SZU7|A0A4X1SZU7_PIG Uncharacterized protein OS=Sus scrofa OX=9823 PE=3 SV=1;tr|A0A4X1SZN5|A0A4X1SZN5_PIG Uncharacterized protein O	14	2	2.9	106.05	972	0.32526	0.50114	4	0	0	0	17439	28214	17770	33599	55587	31196	0	0	0	17500	22672	34484
A0A480V032	SEC14 domain and spectrin repeat-containing protein 1 isoform X1	tr|A0A480V032|A0A480V032_PIG SEC14 domain and spectrin repeat-containing protein 1 isoform X1 OS=Sus scrofa OX=9823 PE=4 SV=1	1	1	1.2	74.498	654	0.42672	0.37702	2	0	0	0	0	0	0	24164	78884	108220	0	0	0	0	0	0
A0A5G2QMJ3	SCP2 domain-containing protein	tr|A0A5G2QMJ3|A0A5G2QMJ3_PIG SCP2 domain-containing protein OS=Sus scrofa OX=9823 GN=PODN PE=1 SV=1;tr|F1S762|F1S762_PIG Non-specific lipid-transfer protein OS=Sus scrofa OX=9823 GN=PODN PE=1 SV=4;tr|D0G7F1|D0G7F1_PIG Non-specific lipid-transfer protein OS	6	1	7.2	15.114	139	0.4816	0.30539	2	0	0	0	0	0	0	0	0	0	275200	120790	226570	0	0	0
A0A4X1UNW7	SCO-spondin	tr|A0A4X1UNW7|A0A4X1UNW7_PIG SCO-spondin OS=Sus scrofa OX=9823 PE=3 SV=1	1	1	0.3	541.39	5101	0.63683	0.11576	1	0	0	0	0	0	0	84603	50469	33535	0	0	0	0	0	0
A0A5G2RHJ0	SCHIP-1 domain-containing protein	tr|A0A5G2RHJ0|A0A5G2RHJ0_PIG SCHIP-1 domain-containing protein OS=Sus scrofa OX=9823 PE=4 SV=1;tr|A0A480VCY2|A0A480VCY2_PIG Schwannomin-interacting protein 1 isoform 1 OS=Sus scrofa OX=9823 PE=4 SV=1;tr|A0A480III4|A0A480III4_PIG Schwannomin-interacting pro	11	1	2	44.852	410	0.48218	0.30462	1	0	0	0	0	0	0	0	0	0	182850	103430	224250	0	0	0
A0A480TX69	SCG6 (Secretogranin VI) isoform SCG6	tr|A0A480TX69|A0A480TX69_PIG SCG6 (Secretogranin VI) isoform SCG6 OS=Sus scrofa OX=9823 PE=4 SV=1	1	1	7.3	18.484	177	0.60512	0.17799	1	0	0	0	0	0	0	0	0	0	102030	65016	154500	0	0	0
A0A4X1W7P7	SCD domain-containing protein	tr|A0A4X1W7P7|A0A4X1W7P7_PIG SCD domain-containing protein OS=Sus scrofa OX=9823 GN=STAG2 PE=3 SV=1;tr|A0A4X1W7Y7|A0A4X1W7Y7_PIG SCD domain-containing protein OS=Sus scrofa OX=9823 GN=STAG2 PE=3 SV=1;tr|A0A286ZJX5|A0A286ZJX5_PIG Cohesin subunit SA-2 isofor	11	2	2.3	132.71	1156	0.36855	0.43737	2	49650	60109	2849.5	0	0	0	0	0	0	0	0	0	0	0	0
Q29112	Scavenger-receptor protein (Fragment)	tr|Q29112|Q29112_PIG Scavenger-receptor protein (Fragment) OS=Sus scrofa OX=9823 GN=WC1 PE=4 SV=1	1	1	1.7	52.368	480	0.57611	0.20874	1	0	0	0	0	0	0	0	0	0	2508900	2281400	2810600	0	0	0
A0A480KA82	Scavenger receptor cysteine-rich type 1 protein M130 isoform X2	tr|A0A480KA82|A0A480KA82_PIG Scavenger receptor cysteine-rich type 1 protein M130 isoform X2 OS=Sus scrofa OX=9823 PE=4 SV=1	1	1	1.2	117.89	1092	0.19345	0.66292	1	0	0	0	0	0	0	141790	214470	200390	0	0	0	0	0	0
A0A4X1TU09	Scavenger receptor cysteine-rich type 1 protein M130	tr|A0A4X1TU09|A0A4X1TU09_PIG Scavenger receptor cysteine-rich type 1 protein M130 OS=Sus scrofa OX=9823 GN=CD163 PE=4 SV=1;tr|A0A287AZE3|A0A287AZE3_PIG Scavenger receptor cysteine-rich type 1 protein M130 OS=Sus scrofa OX=9823 GN=CD163 PE=4 SV=1	2	1	1.5	94.031	869	0.5857	0.19798	1	0	0	0	0	0	0	0	0	0	0	0	0	792940	256380	407120
F1RJR8	Scavenger receptor class A member 5	tr|F1RJR8|F1RJR8_PIG Scavenger receptor class A member 5 OS=Sus scrofa OX=9823 GN=SCARA5 PE=4 SV=4;tr|A0A4X1VA68|A0A4X1VA68_PIG SRCR domain-containing protein OS=Sus scrofa OX=9823 GN=SCARA5 PE=4 SV=1;tr|A0A4X1V6W0|A0A4X1V6W0_PIG Uncharacterized protein OS	4	1	9.7	28.675	269	0.57669	0.20954	1	188494	145630	843530	0	0	0	0	0	0	0	0	0	0	0	0
A0A4X1TF06	SCA7 domain-containing protein	tr|A0A4X1TF06|A0A4X1TF06_PIG SCA7 domain-containing protein OS=Sus scrofa OX=9823 GN=ATXN7L2 PE=4 SV=1;tr|A0A4X1TEZ2|A0A4X1TEZ2_PIG SCA7 domain-containing protein OS=Sus scrofa OX=9823 GN=ATXN7L2 PE=4 SV=1;tr|F1S5Z9|F1S5Z9_PIG Ataxin 7 like 2 OS=Sus scrofa	6	1	3.1	74.778	699	0.36901	0.43679	1	0	0	0	0	0	0	0	0	0	0	0	0	500970	166570	197950
A0A286ZVG0	Saposin-B-Val	tr|A0A286ZVG0|A0A286ZVG0_PIG Saposin-B-Val OS=Sus scrofa OX=9823 GN=PSAP PE=1 SV=2;tr|A0A481C6N8|A0A481C6N8_PIG Prosaposin isoform a preproprotein OS=Sus scrofa OX=9823 PE=4 SV=1;tr|A0A481C9E3|A0A481C9E3_PIG Prosaposin isoform a preproprotein OS=Sus scrofa	17	8	17.5	63.068	573	0	47.78	76	1449310	1526000	1027584	494750	953580	809400	1200500	1165900	1321900	1196000	1422100	802273	1768300	1384900	1507000
F1SLY7	Saposin B-type domain-containing protein	tr|F1SLY7|F1SLY7_PIG Saposin B-type domain-containing protein OS=Sus scrofa OX=9823 GN=CNPY2 PE=1 SV=1;tr|A0A4X1W9B8|A0A4X1W9B8_PIG Saposin B-type domain-containing protein OS=Sus scrofa OX=9823 GN=CNPY2 PE=3 SV=1	2	2	21.4	20.665	182	0.013269	1.6278	19	361060	106230	239203	48127	69907	44252	91457	17555	61773	100100	66642	137030	76899	38485	90987
A0A4X1W9N7	SAP domain-containing protein	tr|A0A4X1W9N7|A0A4X1W9N7_PIG SAP domain-containing protein OS=Sus scrofa OX=9823 GN=SARNP PE=4 SV=1;tr|A0A480SMR3|A0A480SMR3_PIG SAP domain-containing ribonucleoprotein OS=Sus scrofa OX=9823 GN=SARNP PE=1 SV=1;tr|A0A0B8RT89|A0A0B8RT89_PIG SAP domain contai	9	6	24.8	23.635	210	0.0031847	20.485	33	113050	83930	77695	127860	222210	129410	266634	310670	458480	161452	167210	121430	156460	112440	125600
A0A4X1UVU6	SAM_MT_RSMB_NOP domain-containing protein	tr|A0A4X1UVU6|A0A4X1UVU6_PIG SAM_MT_RSMB_NOP domain-containing protein OS=Sus scrofa OX=9823 GN=NOP2 PE=3 SV=1;tr|F1SLR6|F1SLR6_PIG SAM_MT_RSMB_NOP domain-containing protein OS=Sus scrofa OX=9823 GN=NOP2 PE=3 SV=3	2	1	1.7	90.37	821	0.39668	0.40621	1	0	0	0	41658	58344	16091	0	0	0	0	0	0	0	0	0
A0A4X1UTK4	SAM domain-containing protein	tr|A0A4X1UTK4|A0A4X1UTK4_PIG SAM domain-containing protein OS=Sus scrofa OX=9823 GN=SAMD3 PE=4 SV=1;tr|A0A286ZSA4|A0A286ZSA4_PIG Sterile alpha motif domain containing 3 OS=Sus scrofa OX=9823 GN=SAMD3 PE=4 SV=1;tr|F1S3M6|F1S3M6_PIG Sterile alpha motif domai	6	1	5.1	32.166	275	0.59817	0.18328	1	0	0	0	0	0	0	0	0	0	708060	773990	1033200	0	0	0
A0A287BER1	SAM and SH3 domain containing 1	tr|A0A287BER1|A0A287BER1_PIG SAM and SH3 domain containing 1 OS=Sus scrofa OX=9823 GN=SASH1 PE=4 SV=2;tr|A0A287A485|A0A287A485_PIG SAM and SH3 domain containing 1 OS=Sus scrofa OX=9823 GN=SASH1 PE=4 SV=1;tr|A0A287BAA0|A0A287BAA0_PIG SAM and SH3 domain cont	6	1	1.7	126.98	1160	0.35566	0.44761	1	149650	121037	14522	0	0	0	0	0	0	0	0	0	0	0	0
A0A5G2R370	SAFB like transcription modulator	tr|A0A5G2R370|A0A5G2R370_PIG SAFB like transcription modulator OS=Sus scrofa OX=9823 GN=SLTM PE=4 SV=1;tr|A0A480N495|A0A480N495_PIG SAFB-like transcription modulator isoform a OS=Sus scrofa OX=9823 PE=4 SV=1;tr|A0A4X1TMP7|A0A4X1TMP7_PIG Uncharacterized pro	8	1	30.6	6.6237	62	0.58634	0.20148	1	0	0	0	31657	42425	37133	0	0	0	0	0	0	0	0	0
A0A287AUL6	Sad1 and UNC84 domain containing 2	tr|A0A287AUL6|A0A287AUL6_PIG Sad1 and UNC84 domain containing 2 OS=Sus scrofa OX=9823 GN=SUN2 PE=1 SV=1;tr|A0A4X1VSI4|A0A4X1VSI4_PIG SUN domain-containing protein OS=Sus scrofa OX=9823 GN=SUN2 PE=4 SV=1;tr|A0A286ZN31|A0A286ZN31_PIG Sad1 and UNC84 domain co	8	2	5.1	77.262	692	0.54948	0.23404	2	12123	39703	21797	0	0	0	0	0	0	5274800	3696300	2693300	0	0	0
F1RQT0	SAC3 domain containing 1	tr|F1RQT0|F1RQT0_PIG SAC3 domain containing 1 OS=Sus scrofa OX=9823 GN=SAC3D1 PE=4 SV=3;tr|A0A4X1V3U7|A0A4X1V3U7_PIG PCI domain-containing protein OS=Sus scrofa OX=9823 PE=4 SV=1	2	1	6.1	38.702	358	0.52465	0.26407	1	0	0	0	0	0	0	0	0	0	0	0	0	32551	95617	53503
A0A5G2QH54	SAC1 like phosphatidylinositide phosphatase	tr|A0A5G2QH54|A0A5G2QH54_PIG SAC1 like phosphatidylinositide phosphatase OS=Sus scrofa OX=9823 GN=SACM1L PE=1 SV=1;tr|A0A4X1TBN6|A0A4X1TBN6_PIG SAC domain-containing protein OS=Sus scrofa OX=9823 GN=SACM1L PE=4 SV=1;tr|I3LJB6|I3LJB6_PIG Phosphatidylinositi	8	1	2.5	55.577	484	0.53352	0.25604	1	0	0	0	54197	246150	438730	0	0	0	0	0	0	0	0	0
K7GQ95	S100 calcium binding protein A2	tr|K7GQ95|K7GQ95_PIG S100 calcium binding protein A2 OS=Sus scrofa OX=9823 GN=S100A2 PE=1 SV=2	1	1	10.6	18.346	170	0.28184	0.58843	0	56817	29033	9936.2	0	0	0	0	0	0	0	0	0	0	0	0
A0A5G2QEC7	S10_plectin domain-containing protein	tr|A0A5G2QEC7|A0A5G2QEC7_PIG S10_plectin domain-containing protein OS=Sus scrofa OX=9823 GN=NUDT3 PE=1 SV=1;tr|A0A4X1T5N2|A0A4X1T5N2_PIG S10_plectin domain-containing protein OS=Sus scrofa OX=9823 GN=NUDT3 PE=3 SV=1;tr|F1RZ28|F1RZ28_PIG S10_plectin domain-	8	6	25.7	21.058	183	0.005298	1.9205	24	0	0	0	497670	329576	432500	519030	366410	359300	847820	1090700	569490	0	0	0
A0A5G2QGH6	S-methyl-5-thioadenosine phosphorylase	tr|A0A5G2QGH6|A0A5G2QGH6_PIG S-methyl-5-thioadenosine phosphorylase OS=Sus scrofa OX=9823 GN=MTAP PE=1 SV=1;tr|A0A4X1WC51|A0A4X1WC51_PIG S-methyl-5-thioadenosine phosphorylase OS=Sus scrofa OX=9823 GN=MTAP PE=3 SV=1;tr|A0A480UBN5|A0A480UBN5_PIG S-methyl-	4	1	5.1	28.378	255	0.55436	0.22853	1	0	0	0	710020	56959	8263.1	0	0	0	0	0	0	0	0	0
A0A4X1SH01	S-formylglutathione hydrolase	tr|A0A4X1SH01|A0A4X1SH01_PIG S-formylglutathione hydrolase OS=Sus scrofa OX=9823 GN=ESD PE=3 SV=1;tr|A0A5S6IDI6|A0A5S6IDI6_PIG S-formylglutathione hydrolase OS=Sus scrofa OX=9823 GN=ESD PE=1 SV=1;tr|A0A5G2QPR4|A0A5G2QPR4_PIG S-formylglutathione hydrolase O	4	4	25.3	28.231	253	0.0027027	13.154	4	0	0	0	37447	186370	54803	113910	189740	123750	0	0	0	0	0	0
A0A5G2QL09	S-adenosylmethionine synthase	tr|A0A5G2QL09|A0A5G2QL09_PIG S-adenosylmethionine synthase OS=Sus scrofa OX=9823 GN=MAT2A PE=1 SV=1;tr|A0A4X1W539|A0A4X1W539_PIG S-adenosylmethionine synthase OS=Sus scrofa OX=9823 PE=3 SV=1;tr|I3LJR6|I3LJR6_PIG S-adenosylmethionine synthase OS=Sus scrofa	8	2	8	39.74	362	0.078466	1.0185	4	0	0	0	154710	183038	227800	219930	189800	114530	0	0	0	0	0	0
F1RT08	S-adenosylmethionine decarboxylase proenzyme	tr|F1RT08|F1RT08_PIG S-adenosylmethionine decarboxylase proenzyme OS=Sus scrofa OX=9823 GN=AMD1 PE=3 SV=2;tr|A0A4X1VBX0|A0A4X1VBX0_PIG S-adenosylmethionine decarboxylase proenzyme OS=Sus scrofa OX=9823 GN=AMD1 PE=3 SV=1	2	1	2.7	38.364	334	0.65017	0.085711	1	0	0	0	0	0	0	0	0	0	34465	29164	126340	0	0	0
A0A5G2R1W3	Ryanodine receptor 2	tr|A0A5G2R1W3|A0A5G2R1W3_PIG Ryanodine receptor 2 OS=Sus scrofa OX=9823 GN=RYR2 PE=1 SV=1;tr|A0A4X1UPM2|A0A4X1UPM2_PIG Uncharacterized protein OS=Sus scrofa OX=9823 PE=4 SV=1;tr|A0A4X1UP68|A0A4X1UP68_PIG Uncharacterized protein OS=Sus scrofa OX=9823 PE=4 S	4	2	0.4	563.95	4966	0.070448	1.0766	1	0	0	0	124527	576340	100364	0	0	0	0	0	0	667590	209300	301130
A0A4X1VWW0	RWD domain-containing protein	tr|A0A4X1VWW0|A0A4X1VWW0_PIG RWD domain-containing protein OS=Sus scrofa OX=9823 GN=RWDD4 PE=4 SV=1;tr|A0A4X1VXL2|A0A4X1VXL2_PIG RWD domain-containing protein OS=Sus scrofa OX=9823 GN=RWDD4 PE=4 SV=1;tr|A0A480TJX6|A0A480TJX6_PIG RWD domain containing 4 OS=	4	1	7.5	21.145	187	0.19563	0.65699	1	0	0	0	0	0	0	0	0	0	0	0	0	195110	871390	816160
A0A4X1VU44	RuvB-like helicase	tr|A0A4X1VU44|A0A4X1VU44_PIG RuvB-like helicase OS=Sus scrofa OX=9823 GN=RUVBL2 PE=3 SV=1;tr|A0A481C216|A0A481C216_PIG RuvB-like helicase OS=Sus scrofa OX=9823 GN=RUVBL2 PE=1 SV=1;tr|F1RIP4|F1RIP4_PIG RuvB-like helicase OS=Sus scrofa OX=9823 GN=RUVBL2 PE=1	9	7	16.6	51.172	463	0	78.021	38	182870	413870	223120	837930	619690	824550	151630	126430	214770	221370	213470	339780	328350	464830	913460
F1RQS3	RUNX family transcription factor 2	tr|F1RQS3|F1RQS3_PIG RUNX family transcription factor 2 OS=Sus scrofa OX=9823 GN=RUNX2 PE=4 SV=4;tr|A0A287A963|A0A287A963_PIG RUNX family transcription factor 2 OS=Sus scrofa OX=9823 GN=RUNX2 PE=4 SV=2	2	1	4.7	29.962	275	0.63601	0.11798	1	849303	1078000	650700	0	0	0	0	0	0	0	0	0	0	0	0
A0A287BAD4	RUN and SH3 domain containing 1	tr|A0A287BAD4|A0A287BAD4_PIG RUN and SH3 domain containing 1 OS=Sus scrofa OX=9823 GN=RUSC1 PE=4 SV=1;tr|A0A4X1VZV7|A0A4X1VZV7_PIG Uncharacterized protein OS=Sus scrofa OX=9823 PE=4 SV=1;tr|A0A4X1VZA9|A0A4X1VZA9_PIG Uncharacterized protein OS=Sus scrofa OX	6	1	2.6	57.933	545	0.3722	0.42986	1	0	0	0	0	0	0	0	0	0	0	0	0	324530	230160	333550
A0A5G2QEL8	RUN and FYVE domain containing 1	tr|A0A5G2QEL8|A0A5G2QEL8_PIG RUN and FYVE domain containing 1 OS=Sus scrofa OX=9823 GN=RUFY1 PE=1 SV=1;tr|A0A4X1VQW6|A0A4X1VQW6_PIG Uncharacterized protein OS=Sus scrofa OX=9823 GN=RUFY1 PE=4 SV=1;tr|A0A287BJR3|A0A287BJR3_PIG RUN and FYVE domain containing	6	3	5.2	69.127	601	0.027933	1.4516	2	0	0	0	74703	345860	78921	0	0	0	77271	89847	161750	0	0	0
A0A4X1UWE9	RRM domain-containing protein	tr|A0A4X1UWE9|A0A4X1UWE9_PIG RRM domain-containing protein OS=Sus scrofa OX=9823 GN=HNRNPC PE=3 SV=1;tr|A0A287AA79|A0A287AA79_PIG Heterogeneous nuclear ribonucleoproteins C1/C2 isoform X2 OS=Sus scrofa OX=9823 GN=HNRNPC PE=1 SV=2;tr|A0A4X1UYH7|A0A4X1UYH7_P	5	10	33	32.412	294	0	103.24	370	730090	999460	759654	1781100	1976800	2668200	1494700	2283100	1802260	2432000	3012300	1966450	2115900	2402900	1155700
A0A4X1UYD9	RPN13_C domain-containing protein	tr|A0A4X1UYD9|A0A4X1UYD9_PIG RPN13_C domain-containing protein OS=Sus scrofa OX=9823 GN=ADRM1 PE=3 SV=1;tr|A0A287AW94|A0A287AW94_PIG RPN13_C domain-containing protein OS=Sus scrofa OX=9823 GN=ADRM1 PE=1 SV=2;tr|A0A4X1UUI9|A0A4X1UUI9_PIG RPN13_C domain-cont	7	2	8.4	37.349	368	0.002924	16.621	65	249374	208880	277070	111360	99793	97054	193280	239740	257220	168450	132830	367600	436750	211340	564890
A0A5G2R2G0	RP1 axonemal microtubule associated	tr|A0A5G2R2G0|A0A5G2R2G0_PIG RP1 axonemal microtubule associated OS=Sus scrofa OX=9823 GN=RP1 PE=1 SV=1;tr|A0A4X1T198|A0A4X1T198_PIG Uncharacterized protein OS=Sus scrofa OX=9823 PE=4 SV=1	2	1	0.6	239.12	2142	0.3256	0.49623	1	0	0	0	0	0	0	0	0	0	17589	32260	43895	0	0	0
A0A480L7L0	Roundabout homolog 2 isoform 4	tr|A0A480L7L0|A0A480L7L0_PIG Roundabout homolog 2 isoform 4 OS=Sus scrofa OX=9823 PE=4 SV=1;tr|A0A480TKR0|A0A480TKR0_PIG Roundabout homolog 2 isoform ROBO2b OS=Sus scrofa OX=9823 PE=4 SV=1;tr|A0A480KBC3|A0A480KBC3_PIG Roundabout homolog 2 isoform 3 (Fragme	7	1	1.8	142.47	1293	0.65	0.083453	1	0	0	0	0	0	0	12754	93685	96688	0	0	0	0	0	0
A0A480WK69	Rootletin isoform X8	tr|A0A480WK69|A0A480WK69_PIG Rootletin isoform X8 OS=Sus scrofa OX=9823 PE=4 SV=1;tr|A0A480YW19|A0A480YW19_PIG Rootletin OS=Sus scrofa OX=9823 PE=4 SV=1;tr|A0A287AL32|A0A287AL32_PIG Ciliary rootlet coiled-coil, rootletin OS=Sus scrofa OX=9823 GN=CROCC PE=1	5	1	0.7	200.6	1781	0.61019	0.16881	1	187560	120475	28991	0	0	0	0	0	0	0	0	0	0	0	0
A0A4X1TRG1	ROKNT domain-containing protein	tr|A0A4X1TRG1|A0A4X1TRG1_PIG ROKNT domain-containing protein OS=Sus scrofa OX=9823 PE=4 SV=1	1	3	18.6	11.921	102	0.66052	0.029356	1	0	0	0	0	0	0	0	0	0	371270	169860	134060	0	0	0
A0A4X1VSF9	Roc domain-containing protein	tr|A0A4X1VSF9|A0A4X1VSF9_PIG Roc domain-containing protein OS=Sus scrofa OX=9823 GN=MFHAS1 PE=4 SV=1;tr|A0A286ZLI0|A0A286ZLI0_PIG Roc domain-containing protein OS=Sus scrofa OX=9823 GN=MFHAS1 PE=4 SV=1;tr|A0A4X1VT11|A0A4X1VT11_PIG Roc domain-containing pro	4	1	1.5	116.61	1048	0.47707	0.3118	1	0	0	0	0	0	0	0	0	0	0	0	0	283690	168060	131760
A0A4X1TH55	RNB domain-containing protein	tr|A0A4X1TH55|A0A4X1TH55_PIG RNB domain-containing protein OS=Sus scrofa OX=9823 PE=3 SV=1;tr|A0A480M5Z6|A0A480M5Z6_PIG DIS3-like exonuclease 2 isoform 1 OS=Sus scrofa OX=9823 PE=4 SV=1;tr|A0A286ZQQ2|A0A286ZQQ2_PIG DIS3-like exonuclease 2 OS=Sus scrofa OX=	20	1	2.4	64.663	580	0.63251	0.12329	1	0	0	0	0	0	0	181720	2409600	862580	0	0	0	0	0	0
A0A5G2Q8T1	RNAse_Pc domain-containing protein	tr|A0A5G2Q8T1|A0A5G2Q8T1_PIG RNAse_Pc domain-containing protein OS=Sus scrofa OX=9823 GN=LOC110261716 PE=3 SV=1	1	1	7	16.283	142	0.57547	0.2078	1	66664	103390	90420	0	0	0	0	0	0	0	0	0	0	0	0
Q19PY3	RNA-splicing ligase RtcB homolog	sp|Q19PY3|RTCB_PIG RNA-splicing ligase RtcB homolog OS=Sus scrofa OX=9823 GN=RTCB PE=2 SV=1;tr|F2Z5V0|F2Z5V0_PIG RNA-splicing ligase RtcB homolog OS=Sus scrofa OX=9823 GN=RTCB PE=3 SV=1;tr|A0A4X1SVD1|A0A4X1SVD1_PIG RNA-splicing ligase RtcB homolog OS=Sus s	3	1	2.2	55.238	505	0.045825	1.2373	25	128790	124060	110365	273260	190707	109100	250160	224380	331830	183180	171150	224210	0	0	0
A5GFN7	RNA-binding region (RNP1, RRM) containing 1 (Fragment)	tr|A5GFN7|A5GFN7_PIG RNA-binding region (RNP1, RRM) containing 1 (Fragment) OS=Sus scrofa OX=9823 GN=RNPC1 PE=4 SV=1	1	1	6.2	21.081	193	0.60366	0.17914	1	0	0	0	54637	294380	538910	0	0	0	0	0	0	0	0	0
A0A4X1VUG5	RNA-binding protein with serine-rich domain 1	tr|A0A4X1VUG5|A0A4X1VUG5_PIG RNA-binding protein with serine-rich domain 1 OS=Sus scrofa OX=9823 GN=RNPS1 PE=3 SV=1;tr|A0A287BFS1|A0A287BFS1_PIG RNA-binding protein with serine-rich domain 1 OS=Sus scrofa OX=9823 GN=RNPS1 PE=1 SV=1;tr|A0A4X1VV33|A0A4X1VV33	7	4	11.7	31.723	282	0.0045249	2.5034	17	0	0	0	77982	24777	39464	112780	133046	293743	91675	132640	174970	0	0	0
A0A287BSF2	RNA-binding protein 8A	tr|A0A287BSF2|A0A287BSF2_PIG RNA-binding protein 8A OS=Sus scrofa OX=9823 GN=RBM8A PE=1 SV=1;tr|A0A4X1SJ91|A0A4X1SJ91_PIG RNA-binding protein 8A OS=Sus scrofa OX=9823 GN=RBM8A PE=3 SV=1;tr|I3LI59|I3LI59_PIG RNA-binding protein 8A OS=Sus scrofa OX=9823 GN=R	4	1	11.4	19.125	167	0	29.063	41	75240	124110	148090	114350	195990	163180	99777	161900	149970	132620	171962	166950	192790	239494	252510
A0A481A529	RNA-binding protein 6 isoform X1	tr|A0A481A529|A0A481A529_PIG RNA-binding protein 6 isoform X1 OS=Sus scrofa OX=9823 PE=4 SV=1;tr|A0A4X1SM07|A0A4X1SM07_PIG Uncharacterized protein OS=Sus scrofa OX=9823 GN=RBM6 PE=4 SV=1;tr|A0A287ART6|A0A287ART6_PIG RNA binding motif protein 6 OS=Sus scrof	8	1	2.4	67.652	589	0.65901	0.049513	1	0	0	0	0	0	0	32789	71696	66334	0	0	0	0	0	0
Q06AT9	RNA-binding protein 4B	sp|Q06AT9|RBM4B_PIG RNA-binding protein 4B OS=Sus scrofa OX=9823 GN=RBM4B PE=2 SV=1;tr|A0A481DCV4|A0A481DCV4_PIG RNA-binding protein 4B isoform X1 OS=Sus scrofa OX=9823 PE=4 SV=1;tr|A0A480I1Q8|A0A480I1Q8_PIG RNA-binding protein 4 isoform X1 OS=Sus scrofa O	13	6	21.2	40.053	359	0	34.508	40	290400	38145	49256	157568	140400	164710	189820	240360	223888	87106	61684	111370	154800	205880	185590
A0A480JVS5	RNA-binding protein 3 isoform 1	tr|A0A480JVS5|A0A480JVS5_PIG RNA-binding protein 3 isoform 1 OS=Sus scrofa OX=9823 PE=4 SV=1	3	7	46.2	17.035	156	0	66.962	141	623960	1835900	1332047	1231600	1390900	1182700	570580	1058600	784450	696780	849620	534270	920530	740840	658140
F1RQ90	RNA-binding motif protein, X chromosome isoform 1	tr|F1RQ90|F1RQ90_PIG RNA-binding motif protein, X chromosome isoform 1 OS=Sus scrofa OX=9823 GN=RBMX PE=1 SV=1;tr|A0A4X1SG89|A0A4X1SG89_PIG RRM domain-containing protein OS=Sus scrofa OX=9823 GN=RBMX PE=4 SV=1;tr|K7GNV0|K7GNV0_PIG RRM domain-containing pro	9	11	34.6	42.274	390	0	39.208	69	0	0	0	528530	267970	226600	255610	404090	403200	635910	779230	965600	519790	312150	445340
A0A5G2R2D8	RNA terminal phosphate cyclase like 1	tr|A0A5G2R2D8|A0A5G2R2D8_PIG RNA terminal phosphate cyclase like 1 OS=Sus scrofa OX=9823 GN=RCL1 PE=3 SV=1;tr|A0A5G2QY97|A0A5G2QY97_PIG RNA terminal phosphate cyclase like 1 OS=Sus scrofa OX=9823 GN=RCL1 PE=3 SV=1;tr|A0A4X1W823|A0A4X1W823_PIG Uncharacteriz	5	1	7.5	20.32	187	0.65239	0.075381	1	0	0	0	20451	25434	40011	0	0	0	0	0	0	0	0	0
A0A5G2REL8	RNA polymerase-associated protein LE	tr|A0A5G2REL8|A0A5G2REL8_PIG RNA polymerase-associated protein LEO1 OS=Sus scrofa OX=9823 GN=LEO1 PE=1 SV=1;tr|A0A4X1T3I8|A0A4X1T3I8_PIG RNA polymerase-associated protein LEO1 OS=Sus scrofa OX=9823 GN=LEO1 PE=3 SV=1;tr|A0A5G2QE01|A0A5G2QE01_PIG RNA polymer	10	1	1.7	68.131	606	0.58422	0.20283	1	0	0	0	0	0	0	0	0	0	0	0	0	539600	178390	223770
A0A287A5K4	RNA polymerase II subunit B1 CTD phosphatase RPAP2 homolog	tr|A0A287A5K4|A0A287A5K4_PIG RNA polymerase II subunit B1 CTD phosphatase RPAP2 homolog OS=Sus scrofa OX=9823 GN=RPAP2 PE=3 SV=1;tr|A0A4X1U440|A0A4X1U440_PIG RNA polymerase II subunit B1 CTD phosphatase RPAP2 homolog OS=Sus scrofa OX=9823 PE=3 SV=1;tr|A0A4	17	1	2.6	63.699	568	0.62164	0.14274	1	0	0	0	0	0	0	298740	163800	202860	0	0	0	0	0	0
F1SSV8	RNA polymerase II associated protein 1	tr|F1SSV8|F1SSV8_PIG RNA polymerase II associated protein 1 OS=Sus scrofa OX=9823 GN=RPAP1 PE=3 SV=2;tr|A0A4X1UTH4|A0A4X1UTH4_PIG Uncharacterized protein OS=Sus scrofa OX=9823 GN=RPAP1 PE=3 SV=1;tr|A0A4X1UVA6|A0A4X1UVA6_PIG Uncharacterized protein OS=Sus s	10	1	2	117.15	1074	0.56586	0.21557	1	0	0	0	0	0	0	0	0	0	0	0	0	127530	57767	20048
A0A4X1U8N9	RNA methyltransferase	tr|A0A4X1U8N9|A0A4X1U8N9_PIG RNA methyltransferase OS=Sus scrofa OX=9823 GN=MEPCE PE=3 SV=1;tr|A0A480IT56|A0A480IT56_PIG RNA methyltransferase OS=Sus scrofa OX=9823 GN=MEPCE PE=1 SV=1;tr|A0A480XEA9|A0A480XEA9_PIG RNA methyltransferase OS=Sus scrofa OX=9823	4	1	1.4	74.37	690	0.61044	0.16699	1	0	0	0	0	0	0	0	0	0	334880	149870	300030	0	0	0
A0A480DKQ1	RNA helicase Mov10l1	tr|A0A480DKQ1|A0A480DKQ1_PIG RNA helicase Mov10l1 OS=Sus scrofa OX=9823 PE=4 SV=1;tr|A0A4X1UP61|A0A4X1UP61_PIG Uncharacterized protein OS=Sus scrofa OX=9823 PE=4 SV=1	2	1	1.5	104.1	940	0.65446	0.070196	1	0	0	0	210960	2037800	2038500	0	0	0	0	0	0	0	0	0
A0A4X1UJ04	RNA helicase aquarius	tr|A0A4X1UJ04|A0A4X1UJ04_PIG RNA helicase aquarius OS=Sus scrofa OX=9823 GN=AQR PE=3 SV=1;tr|F1SRZ7|F1SRZ7_PIG RNA helicase aquarius OS=Sus scrofa OX=9823 GN=AQR PE=1 SV=3;tr|A0A4X1UNE5|A0A4X1UNE5_PIG RNA helicase aquarius OS=Sus scrofa OX=9823 GN=AQR PE=3	8	1	0.6	164.21	1428	0.5856	0.20036	1	0	0	0	0	0	0	0	0	0	0	0	0	457370	144620	164600
A0A286ZLI8	RNA helicase	tr|A0A286ZLI8|A0A286ZLI8_PIG RNA helicase OS=Sus scrofa OX=9823 GN=DDX17 PE=1 SV=2;tr|A0A4X1VQX8|A0A4X1VQX8_PIG RNA helicase OS=Sus scrofa OX=9823 GN=DDX17 PE=3 SV=1;tr|A0A4X1VS48|A0A4X1VS48_PIG RNA helicase OS=Sus scrofa OX=9823 GN=DDX17 PE=3 SV=1;tr|A0A4	8	14	27.9	64.904	588	0	64.078	189	151630	291710	204263	1349400	1776070	2583000	898530	1022200	1051000	545430	251820	615020	792770	306630	809100
A0A287AZ53	RNA cytidine acetyltransferase	tr|A0A287AZ53|A0A287AZ53_PIG RNA cytidine acetyltransferase OS=Sus scrofa OX=9823 GN=NAT10 PE=3 SV=1;tr|A0A4X1SR76|A0A4X1SR76_PIG RNA cytidine acetyltransferase OS=Sus scrofa OX=9823 GN=NAT10 PE=3 SV=1;tr|F1SGS7|F1SGS7_PIG RNA cytidine acetyltransferase OS	9	1	2.4	104.48	929	0.64685	0.097619	1	0	0	0	0	0	0	582570	743120	410560	0	0	0	0	0	0
A0A5G2QBI6	RNA binding motif protein 42	tr|A0A5G2QBI6|A0A5G2QBI6_PIG RNA binding motif protein 42 OS=Sus scrofa OX=9823 GN=RBM42 PE=4 SV=1;tr|A0A4X1TKX6|A0A4X1TKX6_PIG RRM domain-containing protein OS=Sus scrofa OX=9823 GN=RBM42 PE=4 SV=1;tr|A0A5G2QN45|A0A5G2QN45_PIG RNA binding motif protein 42	14	1	17.7	19.359	181	0.0076239	1.7948	4	158680	86664	75710	0	0	0	294900	464820	200160	0	0	0	359590	232210	380420
F1RXK8	RNA binding motif protein 41	tr|F1RXK8|F1RXK8_PIG RNA binding motif protein 41 OS=Sus scrofa OX=9823 GN=RBM41 PE=4 SV=2;tr|A0A4X1W559|A0A4X1W559_PIG RRM domain-containing protein OS=Sus scrofa OX=9823 GN=RBM41 PE=4 SV=1;tr|A0A287B3I0|A0A287B3I0_PIG RNA binding motif protein 41 OS=Sus	7	2	5.7	50.699	442	0.19935	0.63557	2	0	0	0	4694.3	68432	3839.2	0	0	0	0	0	0	106350	501630	469560
A0A5G2QTY5	RNA binding motif protein 39	tr|A0A5G2QTY5|A0A5G2QTY5_PIG RNA binding motif protein 39 OS=Sus scrofa OX=9823 GN=RBM39 PE=4 SV=1;tr|A0A4X1TEH2|A0A4X1TEH2_PIG Uncharacterized protein OS=Sus scrofa OX=9823 GN=RBM39 PE=4 SV=1;tr|A0A4X1TEF7|A0A4X1TEF7_PIG Uncharacterized protein OS=Sus scr	6	1	17	10.828	94	0.62112	0.14335	1	0	0	0	0	0	0	0	0	0	585200	293880	361360	0	0	0
A0A286ZUX8	RNA binding motif protein 26	tr|A0A286ZUX8|A0A286ZUX8_PIG RNA binding motif protein 26 OS=Sus scrofa OX=9823 GN=RBM26 PE=1 SV=2;tr|A0A4X1V270|A0A4X1V270_PIG Uncharacterized protein OS=Sus scrofa OX=9823 GN=RBM26 PE=4 SV=1	2	1	3.2	110.36	981	0.65051	0.088919	1	0	0	0	156330	16745	20647	0	0	0	0	0	0	0	0	0
F1SIZ8	RNA binding motif protein 15B	tr|F1SIZ8|F1SIZ8_PIG RNA binding motif protein 15B OS=Sus scrofa OX=9823 GN=RBM15B PE=3 SV=3;tr|A0A481DQG6|A0A481DQG6_PIG Putative RNA-binding protein 15B OS=Sus scrofa OX=9823 PE=3 SV=1	2	1	1.5	92.887	854	0.43609	0.35771	1	695120	243790	839850	0	0	0	0	0	0	0	0	0	0	0	0
A0A287B401	RNA binding motif protein 14	tr|A0A287B401|A0A287B401_PIG RNA binding motif protein 14 OS=Sus scrofa OX=9823 GN=RBM14 PE=1 SV=1;tr|A0A4X1TIV0|A0A4X1TIV0_PIG Uncharacterized protein OS=Sus scrofa OX=9823 GN=RBM14 PE=4 SV=1	3	10	19.6	69.561	669	0	36.639	155	144560	56661	84936	414610	481940	854480	374290	426790	439464	396250	561180	932090	594130	446470	869575
A0A287AFI3	RING-type E3 ubiquitin transferase	tr|A0A287AFI3|A0A287AFI3_PIG RING-type E3 ubiquitin transferase OS=Sus scrofa OX=9823 GN=RMND5B PE=4 SV=1;tr|F1S3E2|F1S3E2_PIG RING-type E3 ubiquitin transferase OS=Sus scrofa OX=9823 PE=4 SV=3;tr|A0A4X1VXZ6|A0A4X1VXZ6_PIG RING-type E3 ubiquitin transferas	3	1	4.1	41.294	366	0.1728	0.74068	4	138280	174570	132043	36343	33061	52106	240800	362150	342850	47121	30499	81110	453300	142730	164510
A0A4X1VXY0	RING-type domain-containing protein	tr|A0A4X1VXY0|A0A4X1VXY0_PIG RING-type domain-containing protein OS=Sus scrofa OX=9823 GN=RNF19B PE=4 SV=1;tr|A0A4X1W066|A0A4X1W066_PIG RBR-type E3 ubiquitin transferase OS=Sus scrofa OX=9823 GN=RNF19B PE=4 SV=1;tr|A0A287ASH0|A0A287ASH0_PIG RBR-type E3 ubi	7	1	3.9	45.865	437	0.61534	0.1559	3	130375	134510	573070	769575	1164200	1594033	374300	450485	329374	138280	77647	57461	87032	43396	44932
A0A5G2QW22	Ring finger protein, transmembrane 2	tr|A0A5G2QW22|A0A5G2QW22_PIG Ring finger protein, transmembrane 2 OS=Sus scrofa OX=9823 GN=RNFT2 PE=4 SV=1;tr|F1RKE5|F1RKE5_PIG Ring finger protein, transmembrane 2 OS=Sus scrofa OX=9823 GN=RNFT2 PE=4 SV=1;tr|A0A4X1TS62|A0A4X1TS62_PIG RING-type domain-cont	8	1	2.2	45.814	416	0.63927	0.10737	1	0	0	0	0	0	0	0	0	0	4261800	2360800	2238000	0	0	0
A0A287B6M6	RING finger protein 223	tr|A0A287B6M6|A0A287B6M6_PIG RING finger protein 223 OS=Sus scrofa OX=9823 GN=RNF223 PE=4 SV=1;tr|A0A4X1W911|A0A4X1W911_PIG RING-type domain-containing protein OS=Sus scrofa OX=9823 GN=RNF223 PE=4 SV=1;tr|A0A5G2QYX8|A0A5G2QYX8_PIG Ring finger protein 223 O	3	2	10	26.471	250	0.05169	1.202	2	0	0	0	0	0	0	0	0	0	0	0	0	1155800	427820	563800
A0A5G2QTC1	Ring finger protein 216	tr|A0A5G2QTC1|A0A5G2QTC1_PIG Ring finger protein 216 OS=Sus scrofa OX=9823 GN=RNF216 PE=4 SV=1;tr|I3LPV9|I3LPV9_PIG Ring finger protein 216 OS=Sus scrofa OX=9823 GN=RNF216 PE=4 SV=3;tr|A0A481B0Q9|A0A481B0Q9_PIG E3 ubiquitin-protein ligase RNF216 isoform X2	9	1	2.2	75.348	650	0.52756	0.26056	1	450473	196950	1949000	0	0	0	0	0	0	0	0	0	0	0	0
I3LHN6	Ring finger protein 212B	tr|I3LHN6|I3LHN6_PIG Ring finger protein 212B OS=Sus scrofa OX=9823 GN=RNF212B PE=4 SV=3;tr|A0A4X1V6N9|A0A4X1V6N9_PIG Uncharacterized protein OS=Sus scrofa OX=9823 GN=RNF212B PE=4 SV=1	2	1	4.7	33.551	300	0.59386	0.19093	1	0	0	0	0	0	0	0	0	0	1149600	606650	729220	0	0	0
A0A5G2QT80	Ring finger protein 181	tr|A0A5G2QT80|A0A5G2QT80_PIG Ring finger protein 181 OS=Sus scrofa OX=9823 GN=RNF181 PE=4 SV=1;tr|A0A4X1W5W3|A0A4X1W5W3_PIG Uncharacterized protein OS=Sus scrofa OX=9823 PE=4 SV=1;tr|A0A4X1W676|A0A4X1W676_PIG Uncharacterized protein OS=Sus scrofa OX=9823 P	5	1	33	9.7168	88	0.54968	0.23374	1	0	0	0	69573	31966	65962	0	0	0	0	0	0	0	0	0
A0A287AGU6	Ring finger protein 180	tr|A0A287AGU6|A0A287AGU6_PIG Ring finger protein 180 OS=Sus scrofa OX=9823 GN=RNF180 PE=4 SV=1;tr|F1SKV2|F1SKV2_PIG E3 ubiquitin-protein ligase RNF180 isoform 1 OS=Sus scrofa OX=9823 GN=RNF180 PE=4 SV=3	2	1	3	61.752	535	0.64869	0.092098	1	1803734	2447500	2003843	0	0	0	0	0	0	0	0	0	0	0	0
A0A5G2QXB1	Ring finger protein 141	tr|A0A5G2QXB1|A0A5G2QXB1_PIG Ring finger protein 141 OS=Sus scrofa OX=9823 GN=RNF141 PE=4 SV=1;tr|A0A4X1TXA8|A0A4X1TXA8_PIG RING finger protein 141 OS=Sus scrofa OX=9823 GN=RNF141 PE=4 SV=1;tr|A0A287AJU8|A0A287AJU8_PIG RING finger protein 141 OS=Sus scrofa	3	1	8.3	20.018	181	0.61342	0.16306	1	0	0	0	0	0	0	40439	30474	10782	0	0	0	0	0	0
A0A5G2QKA5	Ring finger protein 128	tr|A0A5G2QKA5|A0A5G2QKA5_PIG Ring finger protein 128 OS=Sus scrofa OX=9823 GN=RNF128 PE=4 SV=1;tr|F1RXM2|F1RXM2_PIG Ring finger protein 128 OS=Sus scrofa OX=9823 GN=RNF128 PE=4 SV=1;tr|A0A4X1W543|A0A4X1W543_PIG RING-type domain-containing protein OS=Sus sc	3	1	4.7	43.938	407	0.54115	0.24282	2	0	0	0	0	0	0	90783	54550	59140	149390	283863	240150	0	0	0
A0A5G2QXW7	Ring finger protein 115	tr|A0A5G2QXW7|A0A5G2QXW7_PIG Ring finger protein 115 OS=Sus scrofa OX=9823 GN=RNF115 PE=4 SV=1;tr|A0A4X1SKR5|A0A4X1SKR5_PIG RING-type domain-containing protein OS=Sus scrofa OX=9823 GN=RNF115 PE=4 SV=1;tr|A0A287B0T0|A0A287B0T0_PIG E3 ubiquitin-protein liga	3	1	6.5	30.571	276	0.00271	13.187	11	0	0	0	34940	27460	11621	26510	37261	58748	23375	31850	26926	0	0	0
A0A5G2QSA8	Ring finger and FYVE like domain containing E3 ubiquitin protein ligase	tr|A0A5G2QSA8|A0A5G2QSA8_PIG Ring finger and FYVE like domain containing E3 ubiquitin protein ligase OS=Sus scrofa OX=9823 GN=RFFL PE=4 SV=1;tr|A0A480RWH3|A0A480RWH3_PIG DNA repair protein RAD51 homolog 4 isoform 1 OS=Sus scrofa OX=9823 PE=4 SV=1;tr|I3LTG9	4	1	3.7	22.999	214	0.46473	0.32256	1	0	0	0	84538	378640	109680	0	0	0	0	0	0	0	0	0
I3LS64	Ricin B-type lectin domain-containing protein	tr|I3LS64|I3LS64_PIG Ricin B-type lectin domain-containing protein OS=Sus scrofa OX=9823 GN=GALNT17 PE=4 SV=3	1	1	3.1	36.821	322	0.58613	0.20082	1	0	0	0	0	0	0	0	0	0	0	0	0	3310200	1917300	1362900
A0A4X1UZJ0	Ribosome biogenesis regulatory protein	tr|A0A4X1UZJ0|A0A4X1UZJ0_PIG Ribosome biogenesis regulatory protein OS=Sus scrofa OX=9823 PE=3 SV=1;tr|F1RTZ0|F1RTZ0_PIG Ribosome biogenesis regulatory protein OS=Sus scrofa OX=9823 GN=RRS1 PE=1 SV=3	2	2	9.4	39.098	340	0.66781	-0.55872	1	0	0	0	0	0	0	0	0	0	0	0	0	5801000	4469100	2161300
F1RSM4	Ribosome biogenesis protein B	tr|F1RSM4|F1RSM4_PIG Ribosome biogenesis protein BOP1 OS=Sus scrofa OX=9823 GN=BOP1 PE=3 SV=2;tr|A0A480VVL2|A0A480VVL2_PIG Ribosome biogenesis protein BOP1 OS=Sus scrofa OX=9823 GN=BOP1 PE=3 SV=1;tr|A0A480KSZ0|A0A480KSZ0_PIG Ribosome biogenesis protein BOP	6	2	3.1	73.497	651	0.49046	0.29631	2	0	0	0	0	0	0	74420	59085	38368	0	0	0	504100	171130	199520
A0A5G2QT87	Ribosome binding protein 1	tr|A0A5G2QT87|A0A5G2QT87_PIG Ribosome binding protein 1 OS=Sus scrofa OX=9823 GN=RRBP1 PE=1 SV=1;tr|A0A480R3A0|A0A480R3A0_PIG Ribosome-binding protein 1 OS=Sus scrofa OX=9823 PE=4 SV=1;tr|A0A480TIE3|A0A480TIE3_PIG Ribosome-binding protein 1 OS=Sus scrofa O	11	12	11.9	148.39	1377	0.0029851	16.944	35	316870	544420	503365	79565	41896	36426	250660	155666	394064	0	0	0	0	0	0
A0A4X1U475	Ribosomal_S13_N domain-containing protein	tr|A0A4X1U475|A0A4X1U475_PIG Ribosomal_S13_N domain-containing protein OS=Sus scrofa OX=9823 PE=4 SV=1	1	1	9.5	10.626	95	0.64771	0.095213	1	0	0	0	0	0	0	66623	165350	23314	0	0	0	0	0	0
A0A4X1USF0	Ribosomal_S10 domain-containing protein	tr|A0A4X1USF0|A0A4X1USF0_PIG Ribosomal_S10 domain-containing protein OS=Sus scrofa OX=9823 GN=MRPL48 PE=4 SV=1;tr|A0A480J9Z6|A0A480J9Z6_PIG 39S ribosomal protein L48, mitochondrial OS=Sus scrofa OX=9823 GN=MRPL48 PE=1 SV=1;tr|A0A5G2QYL4|A0A5G2QYL4_PIG Mito	4	2	10.4	29.896	269	0.29343	0.56396	2	153270	184969	15342	200410	561700	579310	0	0	0	0	0	0	0	0	0
A0A4X1TPC2	Ribosomal_L23eN domain-containing protein	tr|A0A4X1TPC2|A0A4X1TPC2_PIG Ribosomal_L23eN domain-containing protein OS=Sus scrofa OX=9823 GN=RPL23A PE=3 SV=1;tr|A0A286ZL51|A0A286ZL51_PIG Ribosomal protein L23a OS=Sus scrofa OX=9823 GN=RPL23A PE=1 SV=2	4	3	20.5	17.695	156	0.0022371	7.4625	19	127210	71687	90876	0	0	0	11393	9999.6	5793.2	1451240	1433970	1105700	0	0	0
A0A4X1U3M9	Ribosomal_L18_c domain-containing protein	tr|A0A4X1U3M9|A0A4X1U3M9_PIG Ribosomal_L18_c domain-containing protein OS=Sus scrofa OX=9823 PE=3 SV=1;tr|B0FWK5|B0FWK5_PIG Ribosomal protein L5 OS=Sus scrofa OX=9823 GN=RPL5 PE=2 SV=1;tr|A0A4X1U3L7|A0A4X1U3L7_PIG Ribosomal_L18_c domain-containing protein	11	5	21	31.907	276	0.0044776	2.4122	16	230120	150610	202643	62729	146840	58748	38554	38070	37521	42792	59870	54210	0	0	0
A0A287B786	Ribosomal RNA processing 1B	tr|A0A287B786|A0A287B786_PIG Ribosomal RNA processing 1B OS=Sus scrofa OX=9823 GN=RRP1B PE=3 SV=1;tr|A0A4X1TDS8|A0A4X1TDS8_PIG Uncharacterized protein OS=Sus scrofa OX=9823 PE=3 SV=1;tr|A0A287B7Q7|A0A287B7Q7_PIG Ribosomal RNA processing 1B OS=Sus scrofa OX	6	1	2	75.457	693	0.18829	0.67957	0	123410	17161	58860	0	0	0	0	0	0	0	0	0	0	0	0
A0A4X1VWH0	Ribosomal protein S6 kinase	tr|A0A4X1VWH0|A0A4X1VWH0_PIG Ribosomal protein S6 kinase OS=Sus scrofa OX=9823 GN=RPS6KA2 PE=3 SV=1	1	1	1.5	81.385	723	0.58406	0.20298	1	40671	2109.7	18088	0	0	0	0	0	0	0	0	0	0	0	0
A0A287A8T0	Ribosomal protein L7	tr|A0A287A8T0|A0A287A8T0_PIG Ribosomal protein L7 OS=Sus scrofa OX=9823 GN=RPL7 PE=1 SV=2;tr|A0A4X1UMZ5|A0A4X1UMZ5_PIG Uncharacterized protein OS=Sus scrofa OX=9823 GN=RPL7 PE=3 SV=1;tr|A0A480RBI9|A0A480RBI9_PIG 60S ribosomal protein L7 OS=Sus scrofa OX=98	7	4	21.3	29.251	249	0.04499	1.2482	14	309160	431030	344903	0	0	0	48759	35959	16881	0	0	0	0	0	0
A0A286ZL26	Ribosomal protein L19	tr|A0A286ZL26|A0A286ZL26_PIG Ribosomal protein L19 OS=Sus scrofa OX=9823 GN=RPL19 PE=1 SV=1;tr|A0A4X1UFA1|A0A4X1UFA1_PIG Ribosomal protein L19 OS=Sus scrofa OX=9823 PE=3 SV=1;tr|A0A4X1UF92|A0A4X1UF92_PIG Ribosomal protein L19 OS=Sus scrofa OX=9823 PE=3 SV=	6	4	16	20.92	175	0	20.976	15	359460	354870	400976	180880	302832	349890	107230	129037	80256	0	0	0	0	0	0
A0A287A452	Ribosomal protein L15	tr|A0A287A452|A0A287A452_PIG Ribosomal protein L15 OS=Sus scrofa OX=9823 GN=RPL15 PE=1 SV=1;tr|A0A4X1UIB1|A0A4X1UIB1_PIG Ribosomal protein L15 OS=Sus scrofa OX=9823 GN=RPL15 PE=3 SV=1;tr|A0A4X1UNF3|A0A4X1UNF3_PIG Ribosomal protein L15 OS=Sus scrofa OX=9823	6	3	11.2	21.919	187	0.11181	0.89111	12	746160	430473	554324	214580	252520	356020	195382	210310	167508	126750	219372	291610	0	0	0
A0A4X1SYY4	Ribosomal protein	tr|A0A4X1SYY4|A0A4X1SYY4_PIG Ribosomal protein OS=Sus scrofa OX=9823 GN=RPL10A PE=3 SV=1;tr|A0A4X1T0H0|A0A4X1T0H0_PIG Ribosomal protein OS=Sus scrofa OX=9823 GN=RPL10A PE=3 SV=1;sp|P53027|RL10A_PIG 60S ribosomal protein L10a (Fragment) OS=Sus scrofa OX=982	8	5	23.6	24.7	216	0.0025253	10.991	35	890443	656030	554831	1386600	1882710	1964800	967640	834910	650900	616110	761980	736600	0	0	0
I3LG73	Ribosomal L1 domain containing 1	tr|I3LG73|I3LG73_PIG Ribosomal L1 domain containing 1 OS=Sus scrofa OX=9823 GN=RSL1D1 PE=1 SV=3;tr|A0A480XI74|A0A480XI74_PIG Ribosomal L1 domain-containing protein 1 OS=Sus scrofa OX=9823 PE=4 SV=1;tr|A0A480W4U8|A0A480W4U8_PIG Ribosomal L1 domain-containin	8	2	6.3	48.543	444	0.052987	1.1584	11	0	0	0	48626	17770	37269	106330	99030	282250	300140	246280	190200	145230	120450	160370
A0A287B8J0	Ribosomal biogenesis protein LAS1L isoform 3	tr|A0A287B8J0|A0A287B8J0_PIG Ribosomal biogenesis protein LAS1L isoform 3 OS=Sus scrofa OX=9823 PE=4 SV=1;tr|F1RTN1|F1RTN1_PIG LAS1 like ribosome biogenesis factor OS=Sus scrofa OX=9823 GN=LAS1L PE=4 SV=3;tr|A0A4X1VI72|A0A4X1VI72_PIG Uncharacterized protei	3	1	2.1	78.752	679	0.60984	0.17035	1	0	0	0	92983	53115	170689	0	0	0	0	0	0	0	0	0
A0A481CW91	Ribose-phosphate diphosphokinase	tr|A0A481CW91|A0A481CW91_PIG Ribose-phosphate diphosphokinase OS=Sus scrofa OX=9823 PE=3 SV=1;tr|F2Z572|F2Z572_PIG Ribose-phosphate diphosphokinase OS=Sus scrofa OX=9823 GN=PRPS1 PE=1 SV=2;tr|A0A4X1W6P5|A0A4X1W6P5_PIG Pribosyltran_N domain-containing prote	18	2	8.8	34.834	318	0.13952	0.80922	3	0	0	0	0	0	0	94418	248340	37986	0	0	0	0	0	0
I3L7T5	Ribonucloprotein	tr|I3L7T5|I3L7T5_PIG Ribonucloprotein OS=Sus scrofa OX=9823 GN=SNU13 PE=3 SV=1;tr|A0A4X1W4V1|A0A4X1W4V1_PIG Ribonucloprotein OS=Sus scrofa OX=9823 GN=SNU13 PE=3 SV=1;tr|A0A4X1SY17|A0A4X1SY17_PIG Ribonucloprotein OS=Sus scrofa OX=9823 PE=3 SV=1;tr|A0A287AJR	6	8	54.7	14.173	128	0.0021739	6.5574	65	0	0	0	197880	225930	316800	199380	171360	228520	399190	338840	365600	232470	185810	167805
A0A480K0X2	Ribonucleoside-diphosphate reductase	tr|A0A480K0X2|A0A480K0X2_PIG Ribonucleoside-diphosphate reductase OS=Sus scrofa OX=9823 PE=3 SV=1;tr|A0A480L5V7|A0A480L5V7_PIG Ribonucleoside-diphosphate reductase OS=Sus scrofa OX=9823 PE=3 SV=1;tr|F1SUZ5|F1SUZ5_PIG Ribonucleotide reductase catalytic subu	8	2	3.6	88.175	775	0.39338	0.40934	2	0	0	0	216930	2600.4	175930	0	0	0	849070	441120	556150	0	0	0
A0A481BYW0	Ribonuclease Z	tr|A0A481BYW0|A0A481BYW0_PIG Ribonuclease Z OS=Sus scrofa OX=9823 PE=3 SV=1;tr|A0A4X1SQR8|A0A4X1SQR8_PIG ElaC homolog protein 2 OS=Sus scrofa OX=9823 GN=ELAC2 PE=3 SV=1;tr|A0A5G2R0K5|A0A5G2R0K5_PIG ElaC homolog protein 2 OS=Sus scrofa OX=9823 GN=ELAC2 PE=1	10	2	4	69.23	628	0.45837	0.33065	2	0	0	0	1224100	65102	836320	0	0	0	0	0	0	0	0	0
F1RNY8	Ribonuclease P protein subunit p29	tr|F1RNY8|F1RNY8_PIG Ribonuclease P protein subunit p29 OS=Sus scrofa OX=9823 GN=POP4 PE=3 SV=3;tr|A0A4X1TRB3|A0A4X1TRB3_PIG Ribonuclease P protein subunit p29 OS=Sus scrofa OX=9823 GN=POP4 PE=3 SV=1;tr|A0A480XEX1|A0A480XEX1_PIG Ribonuclease P protein subu	6	1	5.7	24.429	209	0.45519	0.33667	1	0	0	0	0	0	0	0	0	0	0	0	0	18050	73316	37523
F1RMX8	Ribonuclease P protein subunit p20	tr|F1RMX8|F1RMX8_PIG Ribonuclease P protein subunit p20 OS=Sus scrofa OX=9823 GN=POP7 PE=3 SV=1;tr|A0A4X1UCQ2|A0A4X1UCQ2_PIG Ribonuclease P protein subunit p20 OS=Sus scrofa OX=9823 GN=POP7 PE=3 SV=1	2	1	6.4	15.743	140	0.63937	0.10737	1	0	0	0	0	0	0	0	0	0	2183700	2104400	2549600	0	0	0
P10775	Ribonuclease inhibitor	sp|P10775|RINI_PIG Ribonuclease inhibitor OS=Sus scrofa OX=9823 GN=RNH1 PE=1 SV=1;tr|A0A5S6HMU1|A0A5S6HMU1_PIG Ribonuclease inhibitor OS=Sus scrofa OX=9823 GN=RNH1 PE=4 SV=1;tr|A0A480LRK1|A0A480LRK1_PIG Ribonuclease inhibitor OS=Sus scrofa OX=9823 PE=4 SV=	6	8	28.7	49.023	456	0	27.621	69	224680	262620	205768	476320	195610	687540	361020	155950	227290	52145	26826	194330	38147	56311	35160
A0A5G2R922	Ribonuclease H	tr|A0A5G2R922|A0A5G2R922_PIG Ribonuclease H OS=Sus scrofa OX=9823 PE=3 SV=1	1	1	1	121.01	1079	0.52741	0.26011	1	47797	22298	23432	0	0	0	0	0	0	0	0	0	0	0	0
A0A4X1TE38	Ribonuclease	tr|A0A4X1TE38|A0A4X1TE38_PIG Ribonuclease OS=Sus scrofa OX=9823 GN=RNASEH2A PE=3 SV=1	1	1	3.3	30.478	274	0.64782	0.096889	1	0	0	0	0	0	0	0	0	0	311730	288450	427910	43031	126800	109220
F1SM62	RIB43A domain with coiled-coils 2	tr|F1SM62|F1SM62_PIG RIB43A domain with coiled-coils 2 OS=Sus scrofa OX=9823 GN=RIBC2 PE=3 SV=3;tr|A0A4X1W3J0|A0A4X1W3J0_PIG Uncharacterized protein OS=Sus scrofa OX=9823 PE=3 SV=1	2	1	5.6	44.925	377	0.65696	0.05811	1	0	0	0	10835	17356	32926	0	0	0	0	0	0	0	0	0
A0A286ZV51	Rhomboid like 3	tr|A0A286ZV51|A0A286ZV51_PIG Rhomboid like 3 OS=Sus scrofa OX=9823 GN=RHBDL3 PE=4 SV=2;tr|F1RKW5|F1RKW5_PIG Rhomboid like 3 OS=Sus scrofa OX=9823 GN=RHBDL3 PE=4 SV=4	2	1	1.4	63.969	586	0.63951	0.10523	1	0	0	0	0	0	0	75710	107180	235970	0	0	0	0	0	0
A0A4X1SSV8	Rhomboid domain-containing protein	tr|A0A4X1SSV8|A0A4X1SSV8_PIG Rhomboid domain-containing protein OS=Sus scrofa OX=9823 GN=RHBDL1 PE=4 SV=1	1	1	4.8	43.327	396	0.59974	0.18245	1	0	0	0	0	0	0	0	0	0	76843	20249	46555	0	0	0
F1RFZ1	Rho-related BTB domain-containing protein 1 isoform 1	tr|F1RFZ1|F1RFZ1_PIG Rho-related BTB domain-containing protein 1 isoform 1 OS=Sus scrofa OX=9823 PE=4 SV=3	1	1	2.7	70.707	621	0.63964	0.10531	1	0	0	0	91401	21986	25778	0	0	0	0	0	0	0	0	0
A0A4X1VT71	Rho-GAP domain-containing protein	tr|A0A4X1VT71|A0A4X1VT71_PIG Rho-GAP domain-containing protein OS=Sus scrofa OX=9823 GN=ARHGAP30 PE=4 SV=1;tr|F1S177|F1S177_PIG Rho GTPase activating protein 30 OS=Sus scrofa OX=9823 GN=ARHGAP30 PE=4 SV=4;tr|A0A4X1VUE5|A0A4X1VUE5_PIG Uncharacterized protei	8	1	2.5	95.427	884	0.19609	0.65677	0	0	0	0	0	0	0	0	0	0	0	0	0	49499	153370	165630
F1RLL1	Rho guanine nucleotide exchange factor 7	tr|F1RLL1|F1RLL1_PIG Rho guanine nucleotide exchange factor 7 OS=Sus scrofa OX=9823 GN=ARHGEF7 PE=1 SV=4	1	1	1.3	87.707	783	0.5959	0.18698	1	0	0	0	0	0	0	0	0	0	0	0	0	171000	68464	37596
I3LQ81	Rho guanine nucleotide exchange factor 5	tr|I3LQ81|I3LQ81_PIG Rho guanine nucleotide exchange factor 5 OS=Sus scrofa OX=9823 GN=ARHGEF5 PE=4 SV=2;tr|A0A4X1UQ29|A0A4X1UQ29_PIG Uncharacterized protein OS=Sus scrofa OX=9823 GN=ARHGEF5 PE=4 SV=1	2	1	0.6	173.54	1574	0.565	0.21763	1	0	0	0	57398	14767	12133	0	0	0	0	0	0	0	0	0
A0A5G2R0A3	Rho guanine nucleotide exchange factor 28	tr|A0A5G2R0A3|A0A5G2R0A3_PIG Rho guanine nucleotide exchange factor 28 OS=Sus scrofa OX=9823 GN=ARHGEF28 PE=4 SV=1;tr|A0A287BH13|A0A287BH13_PIG Rho guanine nucleotide exchange factor 28 OS=Sus scrofa OX=9823 GN=ARHGEF28 PE=4 SV=2;tr|A0A480L5E1|A0A480L5E1_P	8	3	3.1	178.97	1595	0.31847	0.51748	6	143590	84070	13098	4178100	4765800	3451190	5435300	3403820	5869444	0	0	0	0	0	0
A0A480M7S8	Rho guanine nucleotide exchange factor 17	tr|A0A480M7S8|A0A480M7S8_PIG Rho guanine nucleotide exchange factor 17 OS=Sus scrofa OX=9823 PE=4 SV=1	1	2	1.7	180.59	1687	0.42737	0.37291	2	0	0	0	1234000	138973	15615	737120	760850	451930	7721200	5080200	5838400	0	0	0
A0A287ANX2	Rho guanine nucleotide exchange factor 16	tr|A0A287ANX2|A0A287ANX2_PIG Rho guanine nucleotide exchange factor 16 OS=Sus scrofa OX=9823 GN=ARHGEF16 PE=4 SV=1	1	1	1.3	84.767	766	0.60336	0.17931	1	0	0	0	28825	156280	33798	0	0	0	0	0	0	0	0	0
A0A481CKE0	Rho guanine nucleotide exchange factor 11 isoform X13	tr|A0A481CKE0|A0A481CKE0_PIG Rho guanine nucleotide exchange factor 11 isoform X13 OS=Sus scrofa OX=9823 PE=4 SV=1;tr|A0A480WRF7|A0A480WRF7_PIG Rho guanine nucleotide exchange factor 11 isoform X1 OS=Sus scrofa OX=9823 PE=4 SV=1;tr|A0A480U2J0|A0A480U2J0_PI	5	1	0.7	166.83	1509	0.56598	0.21569	1	916520	2858600	2175300	0	0	0	0	0	0	0	0	0	0	0	0
A0A480TIN8	Rho guanine nucleotide exchange factor 10-like protein isoform X9	tr|A0A480TIN8|A0A480TIN8_PIG Rho guanine nucleotide exchange factor 10-like protein isoform X9 OS=Sus scrofa OX=9823 PE=4 SV=1	1	1	2.9	83.973	783	0.52929	0.25794	1	0	0	0	0	0	0	107890	161060	183390	0	0	0	0	0	0
A0A480IX88	Rho guanine nucleotide exchange factor 10 (Fragment)	tr|A0A480IX88|A0A480IX88_PIG Rho guanine nucleotide exchange factor 10 (Fragment) OS=Sus scrofa OX=9823 PE=4 SV=1;tr|A0A480I479|A0A480I479_PIG Rho guanine nucleotide exchange factor 10 OS=Sus scrofa OX=9823 PE=4 SV=1;tr|A0A480YF78|A0A480YF78_PIG Rho guanin	33	3	3.2	141.67	1297	0.46107	0.32635	3	0	0	0	0	0	0	529440	399340	523620	1239900	752290	813920	2012000	4763900	694250
A0A480M7J8	Rho guanine nucleotide exchange factor 1 isoform 1	tr|A0A480M7J8|A0A480M7J8_PIG Rho guanine nucleotide exchange factor 1 isoform 1 OS=Sus scrofa OX=9823 PE=4 SV=1	1	3	3.1	100.67	889	0.50562	0.28318	1	0	0	0	0	0	0	0	0	0	2081300	1854600	2404500	0	0	0
A0A480R9J1	Rho guanine nucleotide exchange factor 1 isoform 1	tr|A0A480R9J1|A0A480R9J1_PIG Rho guanine nucleotide exchange factor 1 isoform 1 OS=Sus scrofa OX=9823 PE=4 SV=1	1	2	4.1	67.683	617	0.55464	0.22648	1	0	0	0	11872	88553	11473	0	0	0	0	0	0	0	0	0
A0A287AJS0	Rho guanine nucleotide exchange factor 1	tr|A0A287AJS0|A0A287AJS0_PIG Rho guanine nucleotide exchange factor 1 OS=Sus scrofa OX=9823 GN=ARHGEF1 PE=1 SV=2;tr|A0A4X1SG16|A0A4X1SG16_PIG Uncharacterized protein OS=Sus scrofa OX=9823 GN=ARHGEF1 PE=4 SV=1;tr|A0A4X1SFI2|A0A4X1SFI2_PIG Uncharacterized pr	21	3	2.7	131.85	1181	0.0034305	3.229	6	0	0	0	43168	37961	65434	0	0	0	11796000	251850	13738000	0	0	0
A0A287ALV3	Rho GTPase-activating protein 7	tr|A0A287ALV3|A0A287ALV3_PIG Rho GTPase-activating protein 7 OS=Sus scrofa OX=9823 GN=DLC1 PE=4 SV=1	1	1	1.5	127.04	1125	0.52715	0.26006	1	0	0	0	0	0	0	291000	1470000	518040	0	0	0	0	0	0
A0A481B335	Rho GTPase-activating protein 4 isoform 2	tr|A0A481B335|A0A481B335_PIG Rho GTPase-activating protein 4 isoform 2 OS=Sus scrofa OX=9823 PE=4 SV=1;tr|A0A4X1VER1|A0A4X1VER1_PIG Uncharacterized protein OS=Sus scrofa OX=9823 PE=4 SV=1;tr|A0A4X1VIS3|A0A4X1VIS3_PIG Uncharacterized protein OS=Sus scrofa O	4	1	1.6	102.07	932	0.60818	0.17223	1	0	0	0	0	0	0	303750	188840	113070	0	0	0	0	0	0
F1RM07	Rho GTPase-activating protein 35	tr|F1RM07|F1RM07_PIG Rho GTPase-activating protein 35 OS=Sus scrofa OX=9823 GN=ARHGAP35 PE=2 SV=3;tr|A0A4X1W347|A0A4X1W347_PIG Uncharacterized protein OS=Sus scrofa OX=9823 GN=ARHGAP35 PE=4 SV=1	2	3	2.5	170.42	1500	0.29274	0.56554	3	311460	358070	384984	0	0	0	78910	64188	52088	702560	373870	439260	0	0	0
A0A480IL49	Rho GTPase-activating protein 17 isoform 1	tr|A0A480IL49|A0A480IL49_PIG Rho GTPase-activating protein 17 isoform 1 OS=Sus scrofa OX=9823 PE=4 SV=1;tr|A0A480JXH1|A0A480JXH1_PIG Rho GTPase-activating protein 17 isoform 1 OS=Sus scrofa OX=9823 PE=4 SV=1;tr|A0A480Z3Q2|A0A480Z3Q2_PIG Rho GTPase-activati	37	1	2.4	60.863	544	0.55315	0.22965	1	45861	19789	21926	0	0	0	0	0	0	0	0	0	0	0	0
A0A5G2R720	Rho GTPase activating protein 9	tr|A0A5G2R720|A0A5G2R720_PIG Rho GTPase activating protein 9 OS=Sus scrofa OX=9823 GN=ARHGAP9 PE=4 SV=1;tr|A0A4X1W5H5|A0A4X1W5H5_PIG Uncharacterized protein OS=Sus scrofa OX=9823 GN=ARHGAP9 PE=4 SV=1;tr|F1SKH5|F1SKH5_PIG Rho GTPase activating protein 9 OS=	6	1	2.9	72.48	650	0.65081	0.084325	1	0	0	0	0	0	0	69548	46055	25927	0	0	0	0	0	0
F1SG15	Rho GTPase activating protein 6	tr|F1SG15|F1SG15_PIG Rho GTPase activating protein 6 OS=Sus scrofa OX=9823 GN=ARHGAP6 PE=4 SV=4;tr|K7GN21|K7GN21_PIG Rho GTPase activating protein 6 OS=Sus scrofa OX=9823 GN=ARHGAP6 PE=4 SV=3;tr|A0A480VVA5|A0A480VVA5_PIG Rho GTPase-activating protein 6 iso	4	2	3.3	77.425	705	0.64555	0.098737	2	0	0	0	428660	2700100	445890	0	0	0	0	0	0	0	0	0
A0A287B910	Rho GTPase activating protein 5	tr|A0A287B910|A0A287B910_PIG Rho GTPase activating protein 5 OS=Sus scrofa OX=9823 GN=ARHGAP5 PE=4 SV=1;tr|I3LD06|I3LD06_PIG Rho GTPase activating protein 5 OS=Sus scrofa OX=9823 GN=ARHGAP5 PE=4 SV=2;tr|A0A4X1T5R7|A0A4X1T5R7_PIG Uncharacterized protein OS=	3	2	2.1	157	1370	0.13991	0.81196	2	0	0	0	380620	21748	11629	0	0	0	1109000	960860	1357400	0	0	0
K7GPR6	Rho GTPase activating protein 36	tr|K7GPR6|K7GPR6_PIG Rho GTPase activating protein 36 OS=Sus scrofa OX=9823 GN=ARHGAP36 PE=4 SV=1;tr|A0A4X1W9Q0|A0A4X1W9Q0_PIG Rho-GAP domain-containing protein OS=Sus scrofa OX=9823 GN=ARHGAP36 PE=4 SV=1	2	1	3.3	61.221	538	0.45532	0.33669	1	0	0	0	0	0	0	2100200	1001700	551980	0	0	0	0	0	0
A0A5G2R0U1	Rho GTPase activating protein 31	tr|A0A5G2R0U1|A0A5G2R0U1_PIG Rho GTPase activating protein 31 OS=Sus scrofa OX=9823 GN=ARHGAP31 PE=4 SV=1;tr|A0A4X1T1E1|A0A4X1T1E1_PIG Rho-GAP domain-containing protein OS=Sus scrofa OX=9823 GN=ARHGAP31 PE=4 SV=1;tr|A0A287ART1|A0A287ART1_PIG Rho GTPase act	5	1	1	156.43	1432	0.42928	0.37107	1	0	0	0	0	0	0	60193	60016	47643	0	0	0	0	0	0
A0A481CDS4	Rho family-interacting cell polarization regulator 1 isoform 3-like	tr|A0A481CDS4|A0A481CDS4_PIG Rho family-interacting cell polarization regulator 1 isoform 3-like OS=Sus scrofa OX=9823 PE=3 SV=1;tr|A0A481BYT9|A0A481BYT9_PIG Rho family-interacting cell polarization regulator 1 isoform 3 OS=Sus scrofa OX=9823 PE=3 SV=1;tr|	14	1	3.5	32.276	283	0.19463	0.65496	0	0	0	0	0	0	0	0	0	0	0	0	0	200950	79173	50329
A0A4X1ULV4	RHD domain-containing protein	tr|A0A4X1ULV4|A0A4X1ULV4_PIG RHD domain-containing protein OS=Sus scrofa OX=9823 GN=RELA PE=4 SV=1;tr|A0A286ZJ10|A0A286ZJ10_PIG RELA proto-oncogene, NF-kB subunit OS=Sus scrofa OX=9823 GN=RELA PE=4 SV=1;tr|A0A480YU82|A0A480YU82_PIG Transcription factor p65	8	2	4.7	49.534	449	0.11858	0.86461	2	21645	80537	27796	0	0	0	0	0	0	311730	292760	432990	4199600	2229200	1564900
A0A287A820	RGS domain-containing protein	tr|A0A287A820|A0A287A820_PIG RGS domain-containing protein OS=Sus scrofa OX=9823 GN=RGS3 PE=4 SV=2;tr|A0A480VDG1|A0A480VDG1_PIG Regulator of G-protein signaling 3 isoform 1 OS=Sus scrofa OX=9823 PE=4 SV=1;tr|A0A5G2QLJ0|A0A5G2QLJ0_PIG Uncharacterized protei	4	2	1.9	56.088	515	0.65059	0.082015	2	0	0	0	0	0	0	106120	23082	32464	0	0	0	0	0	0
A0A4X1W1S4	RFX-type winged-helix domain-containing protein	tr|A0A4X1W1S4|A0A4X1W1S4_PIG RFX-type winged-helix domain-containing protein OS=Sus scrofa OX=9823 GN=RFX3 PE=4 SV=1;tr|A0A4X1W1R9|A0A4X1W1R9_PIG RFX-type winged-helix domain-containing protein OS=Sus scrofa OX=9823 GN=RFX3 PE=4 SV=1;tr|A0A287ANK6|A0A287AN	7	1	1.5	80.849	724	0.055396	1.1379	2	0	0	0	204120	45069	94051	0	0	0	187420	103710	232160	0	0	0
A0A5G2QK63	RFNG O-fucosylpeptide 3-beta-N-acetylglucosaminyltransferase	tr|A0A5G2QK63|A0A5G2QK63_PIG RFNG O-fucosylpeptide 3-beta-N-acetylglucosaminyltransferase OS=Sus scrofa OX=9823 GN=RFNG PE=4 SV=1	1	1	6.2	40.537	372	0.66078	0.032992	1	0	0	0	69399	29777	62342	0	0	0	0	0	0	0	0	0
A0A4X1UJM8	Reverse transcriptase domain-containing protein	tr|A0A4X1UJM8|A0A4X1UJM8_PIG Reverse transcriptase domain-containing protein OS=Sus scrofa OX=9823 PE=4 SV=1	1	1	1.8	78.257	672	0.52888	0.25868	1	106740	385880	125520	30389	27590	33834	53194	87665	37438	908840	904020	1213400	101310	476620	444920
M9NIH8	Retrotransposon-like protein 1	tr|M9NIH8|M9NIH8_PIG Retrotransposon-like protein 1 OS=Sus scrofa OX=9823 GN=RTL1 PE=4 SV=1;tr|B4ZYI5|B4ZYI5_PIG Retrotransposon Gag like 1 OS=Sus scrofa OX=9823 GN=RTL1 PE=2 SV=3;tr|A0A4X1TNW4|A0A4X1TNW4_PIG Uncharacterized protein OS=Sus scrofa OX=9823 G	3	3	2.6	153.22	1357	0.023864	1.4845	11	647760	1083500	897054	222420	302837	367460	548080	196000	346640	885830	930360	1357100	97767	223880	340560
B9A0N2	Retrotransposon-like 1	tr|B9A0N2|B9A0N2_PIG Retrotransposon-like 1 OS=Sus scrofa OX=9823 GN=RTL1 PE=4 SV=1	1	2	2.6	94.757	837	0.35981	0.4455	1	0	0	0	0	0	0	0	0	0	0	0	0	203430	81176	52381
I3LSK9	Retrotransposon Gag like 9	tr|I3LSK9|I3LSK9_PIG Retrotransposon Gag like 9 OS=Sus scrofa OX=9823 GN=RTL9 PE=4 SV=2	1	2	2.8	144.32	1409	0.61318	0.16118	2	0	0	0	60465	34609	32737	0	0	0	2477500	2177800	2777800	0	0	0
A0A480TYL2	Retinol dehydrogenase 16 isoform 1 (Fragment)	tr|A0A480TYL2|A0A480TYL2_PIG Retinol dehydrogenase 16 isoform 1 (Fragment) OS=Sus scrofa OX=9823 PE=3 SV=1	1	1	14.4	23.964	216	0.26821	0.61119	0	0	0	0	0	0	0	16761	29034	8178	0	0	0	0	0	0
A0A480KRB1	Retinoic acid-induced protein 1	tr|A0A480KRB1|A0A480KRB1_PIG Retinoic acid-induced protein 1 OS=Sus scrofa OX=9823 PE=4 SV=1;tr|A0A480MMW5|A0A480MMW5_PIG Retinoic acid-induced protein 1 OS=Sus scrofa OX=9823 PE=4 SV=1;tr|A0A480LXN9|A0A480LXN9_PIG Retinoic acid-induced protein 1 OS=Sus sc	8	1	0.5	159.71	1536	0.64777	0.093485	1	0	0	0	99453	54412	200260	0	0	0	0	0	0	0	0	0
A0A287A2H8	Retinoic acid receptor RXR-gamma	tr|A0A287A2H8|A0A287A2H8_PIG Retinoic acid receptor RXR-gamma OS=Sus scrofa OX=9823 GN=RXRG PE=3 SV=2;sp|Q0GFF6|RXRG_PIG Retinoic acid receptor RXR-gamma OS=Sus scrofa OX=9823 GN=RXRG PE=2 SV=2;tr|A0A480MMY0|A0A480MMY0_PIG Retinoic acid receptor RXR-gamma	3	1	2.3	47.422	434	0.28486	0.58123	1	0	0	0	0	0	0	0	0	0	44149	72972	118050	0	0	0
F1SGE6	Retinoic acid receptor gamma	tr|F1SGE6|F1SGE6_PIG Retinoic acid receptor gamma OS=Sus scrofa OX=9823 GN=RARG PE=3 SV=2;tr|A0A4X1WBC8|A0A4X1WBC8_PIG Uncharacterized protein OS=Sus scrofa OX=9823 PE=3 SV=1	2	2	3.1	49.901	447	0.063138	1.0978	4	118670	79504	43744	0	0	0	17470	35970	19220	0	0	0	39744	38000	99200
F1SQQ4	Retinoic acid induced 2	tr|F1SQQ4|F1SQQ4_PIG Retinoic acid induced 2 OS=Sus scrofa OX=9823 GN=RAI2 PE=4 SV=1;tr|A0A5G2QMC9|A0A5G2QMC9_PIG Retinoic acid induced 2 OS=Sus scrofa OX=9823 GN=RAI2 PE=4 SV=1	2	1	4.5	56.35	531	0.19967	0.64006	0	0	0	0	5684.3	69519	6658.1	0	0	0	0	0	0	0	0	0
A0A4X1VE52	Reticulon	tr|A0A4X1VE52|A0A4X1VE52_PIG Reticulon OS=Sus scrofa OX=9823 PE=4 SV=1;tr|A0A287BB01|A0A287BB01_PIG Reticulon OS=Sus scrofa OX=9823 GN=RTN3 PE=1 SV=2;tr|F1RPY3|F1RPY3_PIG Reticulon OS=Sus scrofa OX=9823 GN=RTN3 PE=1 SV=3;tr|A0A4X1VI92|A0A4X1VI92_PIG Reticu	5	1	16.2	26.182	241	0.004491	2.4726	12	143070	102732	189384	74131	90228	75860	137310	208264	178050	177435	162586	178580	127500	159560	214608
A0A480R2Z0	Reticulocalbin-1	tr|A0A480R2Z0|A0A480R2Z0_PIG Reticulocalbin-1 OS=Sus scrofa OX=9823 PE=4 SV=1;tr|A0A481BPW7|A0A481BPW7_PIG Reticulocalbin-1 OS=Sus scrofa OX=9823 PE=4 SV=1;tr|A0A480WXV6|A0A480WXV6_PIG Reticulocalbin-1 OS=Sus scrofa OX=9823 PE=4 SV=1;tr|A0A480N6D4|A0A480N6	7	2	11.3	30.708	256	0.38437	0.41938	2	0	0	0	0	0	0	67910	44237	25218	124300	35682	112550	0	0	0
F1SJ93	Reticulocalbin 2	tr|F1SJ93|F1SJ93_PIG Reticulocalbin 2 OS=Sus scrofa OX=9823 GN=RCN2 PE=1 SV=4;tr|A0A4X1TWE4|A0A4X1TWE4_PIG Uncharacterized protein OS=Sus scrofa OX=9823 GN=RCN2 PE=4 SV=1;tr|A0A5G2QY21|A0A5G2QY21_PIG Reticulocalbin 2 OS=Sus scrofa OX=9823 GN=RCN2 PE=1 SV=1	4	3	17.7	36.669	316	0.0020408	5.4242	10	0	0	0	88248	90878	120740	114910	174833	169770	138650	362773	161520	0	0	0
A0A480RTT0	REST corepressor 3 isoform a	tr|A0A480RTT0|A0A480RTT0_PIG REST corepressor 3 isoform a OS=Sus scrofa OX=9823 PE=4 SV=1;tr|A0A4X1TKG7|A0A4X1TKG7_PIG Uncharacterized protein OS=Sus scrofa OX=9823 GN=RCOR3 PE=4 SV=1;tr|A0A481B0Q0|A0A481B0Q0_PIG REST corepressor 3 isoform a OS=Sus scrofa	10	1	4.3	39.371	351	0.2582	0.62675	2	0	0	0	0	0	0	81036	49855	31699	0	0	0	0	0	0
A0A5G2QQZ5	REST corepressor 2	tr|A0A5G2QQZ5|A0A5G2QQZ5_PIG REST corepressor 2 OS=Sus scrofa OX=9823 GN=RCOR2 PE=4 SV=1;tr|A0A4X1VH91|A0A4X1VH91_PIG Uncharacterized protein OS=Sus scrofa OX=9823 GN=RCOR2 PE=4 SV=1;tr|F1RPY6|F1RPY6_PIG REST corepressor 2 OS=Sus scrofa OX=9823 GN=RCOR2 PE	6	1	3.5	54.695	490	0.43484	0.3601	1	0	0	0	0	0	0	140260	196650	153880	0	0	0	0	0	0
A0A4X1UPR2	Replication termination factor 2	tr|A0A4X1UPR2|A0A4X1UPR2_PIG Replication termination factor 2 OS=Sus scrofa OX=9823 GN=RTF2 PE=3 SV=1;tr|A0A5S8KIH0|A0A5S8KIH0_PIG Replication termination factor 2 OS=Sus scrofa OX=9823 GN=RTF2 PE=3 SV=1;sp|A5GFW7|RTF2_PIG Replication termination factor 2	3	2	11.8	33.53	305	0.32053	0.51177	2	0	0	0	253640	1358900	284932	0	0	0	3473900	2105400	1850400	0	0	0
F1STM9	Replication protein A2	tr|F1STM9|F1STM9_PIG Replication protein A2 OS=Sus scrofa OX=9823 GN=RPA2 PE=1 SV=2;tr|A0A5G2RFY6|A0A5G2RFY6_PIG Replication protein A 32 kDa subunit isoform 1 OS=Sus scrofa OX=9823 GN=RPA2 PE=1 SV=1;tr|A0A5G2RE33|A0A5G2RE33_PIG Replication protein A2 OS=S	4	1	3.5	27.775	255	0.62941	0.13439	1	0	0	0	169520	103360	80623	0	0	0	0	0	0	0	0	0
A0A480V683	Replication protein A subunit	tr|A0A480V683|A0A480V683_PIG Replication protein A subunit OS=Sus scrofa OX=9823 PE=3 SV=1;tr|A0A5G2QHD4|A0A5G2QHD4_PIG Replication protein A subunit OS=Sus scrofa OX=9823 GN=RPA1 PE=1 SV=1;tr|F1RHH4|F1RHH4_PIG Replication protein A subunit OS=Sus scrofa O	8	1	2.8	63.232	576	0.029724	1.3393	10	142425	114280	126180	12233	15242	23595	0	0	0	27428	42791	48894	0	0	0
A0A4X1UZF8	Replication factor C subunit 1	tr|A0A4X1UZF8|A0A4X1UZF8_PIG Replication factor C subunit 1 OS=Sus scrofa OX=9823 PE=3 SV=1;tr|A0A287BT28|A0A287BT28_PIG Replication factor C subunit 1 OS=Sus scrofa OX=9823 GN=RFC1 PE=3 SV=1;tr|F1S4I7|F1S4I7_PIG Replication factor C subunit 1 OS=Sus scrof	7	1	1.2	120.77	1075	0.37054	0.43347	1	0	0	0	0	0	0	45348	68786	71056	0	0	0	0	0	0
A0A4X1UW57	Rep_fac_C domain-containing protein	tr|A0A4X1UW57|A0A4X1UW57_PIG Rep_fac_C domain-containing protein OS=Sus scrofa OX=9823 PE=4 SV=1;tr|A0A5G2QA66|A0A5G2QA66_PIG Replication factor C subunit 2 OS=Sus scrofa OX=9823 GN=RFC2 PE=1 SV=1;tr|A0A4X1UR99|A0A4X1UR99_PIG Uncharacterized protein OS=Sus	14	1	2.8	28.053	250	0.14115	0.80455	0	77921	56546	22067	0	0	0	0	0	0	0	0	0	0	0	0
A0A286ZS25	RELB proto-oncogene, NF-kB subunit	tr|A0A286ZS25|A0A286ZS25_PIG RELB proto-oncogene, NF-kB subunit OS=Sus scrofa OX=9823 GN=RELB PE=4 SV=2;tr|A0A4X1VWW5|A0A4X1VWW5_PIG RHD domain-containing protein OS=Sus scrofa OX=9823 PE=4 SV=1;tr|A0A5G2RBU4|A0A5G2RBU4_PIG RELB proto-oncogene, NF-kB subun	3	2	5.1	61.537	574	0.42658	0.37755	2	74385	21412	55886	0	0	0	0	0	0	0	0	0	113410	25086	33678
F1RSS8	Relaxin family peptide receptor 2	tr|F1RSS8|F1RSS8_PIG Relaxin family peptide receptor 2 OS=Sus scrofa OX=9823 GN=RXFP2 PE=4 SV=2;tr|A0A4X1THX8|A0A4X1THX8_PIG G_PROTEIN_RECEP_F1_2 domain-containing protein OS=Sus scrofa OX=9823 PE=4 SV=1;tr|I3LLS2|I3LLS2_PIG Relaxin family peptide receptor	4	1	1.8	81.1	711	0.49924	0.28913	1	0	0	0	0	0	0	0	0	0	142980	46092	149370	0	0	0
A0A5G2R6M5	Relaxin family peptide receptor 1	tr|A0A5G2R6M5|A0A5G2R6M5_PIG Relaxin family peptide receptor 1 OS=Sus scrofa OX=9823 GN=RXFP1 PE=4 SV=1;tr|A0A4X1U4S7|A0A4X1U4S7_PIG G_PROTEIN_RECEP_F1_2 domain-containing protein OS=Sus scrofa OX=9823 GN=RXFP1 PE=4 SV=1;tr|A0A480EUG1|A0A480EUG1_PIG Relaxi	17	1	1.4	66.998	579	0.65152	0.081363	2	0	0	0	0	0	0	929340	890810	779480	1230900	1903726	2103725	0	0	0
A0A287AKP3	Regulatory factor X1	tr|A0A287AKP3|A0A287AKP3_PIG Regulatory factor X1 OS=Sus scrofa OX=9823 GN=RFX1 PE=4 SV=2	1	1	1.5	98.49	916	0.65103	0.076537	1	0	0	0	0	0	0	0	0	0	65642	55448	101520	0	0	0
A0A5G2R2Q5	Regulator of MON1-CCZ1	tr|A0A5G2R2Q5|A0A5G2R2Q5_PIG Regulator of MON1-CCZ1 OS=Sus scrofa OX=9823 GN=RMC1 PE=4 SV=1;tr|A0A4X1VPZ5|A0A4X1VPZ5_PIG Mic1 domain-containing protein OS=Sus scrofa OX=9823 GN=RMC1 PE=4 SV=1;tr|A0A5G2QSE7|A0A5G2QSE7_PIG Regulator of MON1-CCZ1 OS=Sus scrof	7	1	2.5	69.346	609	0.4637	0.32325	1	27805	103270	9384.2	0	0	0	0	0	0	0	0	0	0	0	0
A0A480PJ72	Regulator of G-protein signaling 9 isoform 3	tr|A0A480PJ72|A0A480PJ72_PIG Regulator of G-protein signaling 9 isoform 3 OS=Sus scrofa OX=9823 PE=4 SV=1;tr|A0A480MRY6|A0A480MRY6_PIG Regulator of G-protein signaling 9 isoform 3 OS=Sus scrofa OX=9823 PE=4 SV=1;tr|A0A480Y0V5|A0A480Y0V5_PIG Regulator of G-	7	1	10.3	26.172	224	0.56467	0.21803	1	0	0	0	0	0	0	0	0	0	198080	116880	256210	0	0	0
A0A4X1TXR1	Regulator of G-protein signaling 8	tr|A0A4X1TXR1|A0A4X1TXR1_PIG Regulator of G-protein signaling 8 OS=Sus scrofa OX=9823 GN=RGS8 PE=4 SV=1;tr|A0A287BNH7|A0A287BNH7_PIG Regulator of G-protein signaling 8 OS=Sus scrofa OX=9823 GN=RGS8 PE=1 SV=1	2	1	4.4	20.935	180	0.40107	0.40109	1	0	0	0	0	0	0	0	0	0	0	0	0	520120	177990	214540
Q864Z2	Regulator of G-protein signaling 5	sp|Q864Z2|RGS5_PIG Regulator of G-protein signaling 5 OS=Sus scrofa OX=9823 GN=RGS5 PE=2 SV=1;tr|A0A480ZJZ5|A0A480ZJZ5_PIG Regulator of G-protein signaling 5 OS=Sus scrofa OX=9823 PE=4 SV=1;tr|A0A5G2R4Y5|A0A5G2R4Y5_PIG Regulator of G-protein signaling 5 OS	3	1	8.3	21.054	181	0.068203	1.0855	1	0	0	0	0	0	0	0	0	0	727530	873290	2078900	0	0	0
A0A480XIA8	Regulator of G-protein signaling 12	tr|A0A480XIA8|A0A480XIA8_PIG Regulator of G-protein signaling 12 OS=Sus scrofa OX=9823 PE=4 SV=1;tr|A0A480TTU1|A0A480TTU1_PIG Regulator of G-protein signaling 12 OS=Sus scrofa OX=9823 PE=4 SV=1;tr|A0A4X1ST42|A0A4X1ST42_PIG PID domain-containing protein OS=	8	2	2.8	144.54	1342	0.61146	0.16607	2	34161	50205	88403	0	0	0	68732	62649	49849	0	0	0	0	0	0
A0A5G2RCG3	Regulator of G-protein signaling 1	tr|A0A5G2RCG3|A0A5G2RCG3_PIG Regulator of G-protein signaling 1 OS=Sus scrofa OX=9823 GN=RGS1 PE=4 SV=1;tr|A0A4X1TQM2|A0A4X1TQM2_PIG Regulator of G-protein signaling 1 OS=Sus scrofa OX=9823 GN=RGS1 PE=4 SV=1;tr|A0A4X1TVW5|A0A4X1TVW5_PIG Regulator of G-prot	4	2	15.5	18.86	168	0.66703	0.0031739	1	0	0	0	0	0	0	22520	189120	48555	0	0	0	0	0	0
A0A287ASE3	Regulator of G protein signaling 7	tr|A0A287ASE3|A0A287ASE3_PIG Regulator of G protein signaling 7 OS=Sus scrofa OX=9823 GN=RGS7 PE=1 SV=2;tr|A0A4X1TJU3|A0A4X1TJU3_PIG RGS domain-containing protein OS=Sus scrofa OX=9823 GN=RGS7 PE=4 SV=1;tr|A0A4X1TK18|A0A4X1TK18_PIG Uncharacterized protein	6	2	9	51.823	444	0.13724	0.81479	1	0	0	0	136590	47160	202360	117060	48316	19626	0	0	0	0	0	0
A0A5G2RH60	Regulator of G protein signaling 4	tr|A0A5G2RH60|A0A5G2RH60_PIG Regulator of G protein signaling 4 OS=Sus scrofa OX=9823 GN=RGS4 PE=4 SV=1;tr|A0A4X1VJD7|A0A4X1VJD7_PIG Uncharacterized protein OS=Sus scrofa OX=9823 GN=RGS4 PE=4 SV=1;tr|F1S215|F1S215_PIG Regulator of G-protein signaling 4 OS=	4	1	12.9	10.312	93	0.49911	0.28901	1	0	0	0	0	0	0	0	0	0	0	0	0	243250	920990	163590
A0A5G2QML2	Regulator of G protein signaling 20	tr|A0A5G2QML2|A0A5G2QML2_PIG Regulator of G protein signaling 20 OS=Sus scrofa OX=9823 GN=RGS20 PE=1 SV=1;tr|A0A4X1T676|A0A4X1T676_PIG RGS domain-containing protein OS=Sus scrofa OX=9823 PE=4 SV=1	2	1	8	31.262	274	0.65085	0.081731	1	0	0	0	0	0	0	0	0	0	269860	116810	223720	0	0	0
A0A287B1Z2	Regulator of G protein signaling 19	tr|A0A287B1Z2|A0A287B1Z2_PIG Regulator of G protein signaling 19 OS=Sus scrofa OX=9823 GN=RGS19 PE=4 SV=1;tr|A0A4X1TLY9|A0A4X1TLY9_PIG RGS domain-containing protein OS=Sus scrofa OX=9823 GN=RGS19 PE=4 SV=1	2	2	6.6	33.091	302	0.60015	0.18222	2	69798	890910	44389	22513	130100	17385	0	0	0	36538	34232	85255	0	0	0
F1S3D6	Regulator of G protein signaling 14	tr|F1S3D6|F1S3D6_PIG Regulator of G protein signaling 14 OS=Sus scrofa OX=9823 GN=RGS14 PE=4 SV=4;tr|A0A4X1SFA4|A0A4X1SFA4_PIG Uncharacterized protein OS=Sus scrofa OX=9823 GN=RGS14 PE=4 SV=1;tr|A0A4X1SFS5|A0A4X1SFS5_PIG Uncharacterized protein OS=Sus scro	3	1	3.9	61.45	567	0.65997	0.035296	1	0	0	0	0	0	0	0	0	0	906390	458780	599430	0	0	0
F1SUQ8	Regulator of chromosome condensation 2	tr|F1SUQ8|F1SUQ8_PIG Regulator of chromosome condensation 2 OS=Sus scrofa OX=9823 GN=RCC2 PE=1 SV=2;tr|A0A287BJ22|A0A287BJ22_PIG Regulator of chromosome condensation 2 OS=Sus scrofa OX=9823 GN=RCC2 PE=1 SV=1;tr|A0A4X1W8B4|A0A4X1W8B4_PIG Uncharacterized pro	5	4	9.6	56.085	520	0.029851	1.3461	11	0	0	0	183500	116650	308070	88161	69743	97450	298620	185947	337640	0	0	0
I3LT85	Regulator of chromosome condensation 1	tr|I3LT85|I3LT85_PIG Regulator of chromosome condensation 1 OS=Sus scrofa OX=9823 GN=RCC1 PE=1 SV=2;tr|A0A4X1TIW2|A0A4X1TIW2_PIG Uncharacterized protein OS=Sus scrofa OX=9823 GN=RCC1 PE=4 SV=1;tr|A0A286ZI92|A0A286ZI92_PIG Regulator of chromosome condensati	7	5	18.7	45.898	427	0	49.169	24	0	0	0	89625	109600	93020	94868	117890	149308	265757	112870	269310	0	0	0
A0A287B672	Regulation of nuclear pre-mRNA domain containing 1A	tr|A0A287B672|A0A287B672_PIG Regulation of nuclear pre-mRNA domain containing 1A OS=Sus scrofa OX=9823 GN=RPRD1A PE=1 SV=2;tr|I3LT67|I3LT67_PIG Regulation of nuclear pre-mRNA domain containing 1A OS=Sus scrofa OX=9823 GN=RPRD1A PE=1 SV=3;tr|A0A4X1VAS9|A0A4	8	1	3.1	29.779	261	0.65151	0.080472	1	0	0	0	0	0	0	0	0	0	25065	11603	32340	0	0	0
A0A286ZM25	Regulating synaptic membrane exocytosis protein 2 isoform d	tr|A0A286ZM25|A0A286ZM25_PIG Regulating synaptic membrane exocytosis protein 2 isoform d OS=Sus scrofa OX=9823 GN=RIMS2 PE=1 SV=1	1	1	4.6	30.901	284	0.41731	0.38479	1	0	0	0	41554	202350	50488	0	0	0	0	0	0	0	0	0
A0A287A8N9	Regulating synaptic membrane exocytosis 1	tr|A0A287A8N9|A0A287A8N9_PIG Regulating synaptic membrane exocytosis 1 OS=Sus scrofa OX=9823 GN=RIMS1 PE=1 SV=2;tr|A0A287B2U7|A0A287B2U7_PIG Regulating synaptic membrane exocytosis 1 OS=Sus scrofa OX=9823 GN=RIMS1 PE=1 SV=2;tr|A0A5G2QDA4|A0A5G2QDA4_PIG Reg	20	1	0.5	164.02	1474	0.57004	0.21252	1	7127	44873	34751	0	0	0	0	0	0	0	0	0	0	0	0
A0A287A3A7	Refilin A	tr|A0A287A3A7|A0A287A3A7_PIG Refilin A OS=Sus scrofa OX=9823 GN=RFLNA PE=3 SV=2	1	1	11.7	28.642	266	0.0018868	4.135	1	271670	690120	60273	0	0	0	0	0	0	0	0	0	0	0	0
A0A4X1VI34	Reelin domain-containing protein	tr|A0A4X1VI34|A0A4X1VI34_PIG Reelin domain-containing protein OS=Sus scrofa OX=9823 PE=4 SV=1;tr|A0A5G2QHK7|A0A5G2QHK7_PIG Reelin domain-containing protein OS=Sus scrofa OX=9823 GN=REELD1 PE=4 SV=1	2	1	3	53.592	498	0.47158	0.31698	1	0	0	0	0	0	0	0	0	0	309040	135340	256950	0	0	0
I3L579	Receptor-interacting serine/threonine-protein kinase 2	tr|I3L579|I3L579_PIG Receptor-interacting serine/threonine-protein kinase 2 OS=Sus scrofa OX=9823 PE=4 SV=2;tr|K7GL70|K7GL70_PIG Receptor-interacting serine/threonine-protein kinase 2 OS=Sus scrofa OX=9823 GN=RIPK2 PE=2 SV=3;tr|A0A4X1UDS0|A0A4X1UDS0_PIG Re	3	1	2.7	54.415	479	0.54745	0.23766	1	0	0	0	70721	331940	75849	0	0	0	0	0	0	0	0	0
A0A287BRX9	Receptor protein-tyrosine kinase	tr|A0A287BRX9|A0A287BRX9_PIG Receptor protein-tyrosine kinase OS=Sus scrofa OX=9823 GN=DDR2 PE=4 SV=1;tr|A0A4X1VG10|A0A4X1VG10_PIG Receptor protein-tyrosine kinase OS=Sus scrofa OX=9823 GN=DDR2 PE=4 SV=1;tr|A0A287BGA1|A0A287BGA1_PIG Receptor protein-tyrosi	9	3	4.1	96.48	851	0.34667	0.46023	3	91668	66041	44290	33005	64093	131890	717540	550190	135890	59661	39600	76234	104220	492930	466670
A0A287ACF0	Receptor protein serine/threonine kinase	tr|A0A287ACF0|A0A287ACF0_PIG Receptor protein serine/threonine kinase OS=Sus scrofa OX=9823 GN=ACVRL1 PE=3 SV=1;tr|A0A4X1WBZ3|A0A4X1WBZ3_PIG Receptor protein serine/threonine kinase OS=Sus scrofa OX=9823 GN=ACVRL1 PE=3 SV=1;tr|K9IVI7|K9IVI7_PIG Receptor pr	5	1	5.7	50.494	455	0.50301	0.2853	1	83237	97490	27980	0	0	0	73668	58669	38108	0	0	0	0	0	0
P63246	Receptor of activated protein C kinase 1	sp|P63246|RACK1_PIG Receptor of activated protein C kinase 1 OS=Sus scrofa OX=9823 GN=RACK1 PE=1 SV=3;tr|A0A4X1U2Z0|A0A4X1U2Z0_PIG Receptor of-activated protein C kinase 1 OS=Sus scrofa OX=9823 GN=RACK1 PE=4 SV=1;tr|A0A286ZLL3|A0A286ZLL3_PIG Receptor of-ac	7	10	47	35.076	317	0.0019569	4.6093	47	244980	166840	201735	688460	1076520	519900	461230	178960	484780	324960	142100	473846	201970	79706	50506
F1SLA3	Receptor like tyrosine kinase	tr|F1SLA3|F1SLA3_PIG Receptor like tyrosine kinase OS=Sus scrofa OX=9823 GN=RYK PE=4 SV=4;tr|A0A4X1TUJ5|A0A4X1TUJ5_PIG Uncharacterized protein OS=Sus scrofa OX=9823 PE=4 SV=1	2	1	3	63.625	566	0.43318	0.36571	1	0	0	0	0	0	0	0	0	0	0	0	0	47971	21050	21124
F1RWY6	Receptor interacting serine/threonine kinase 1	tr|F1RWY6|F1RWY6_PIG Receptor interacting serine/threonine kinase 1 OS=Sus scrofa OX=9823 GN=RIPK1 PE=4 SV=3;tr|A0A4X1SPW4|A0A4X1SPW4_PIG Uncharacterized protein OS=Sus scrofa OX=9823 GN=RIPK1 PE=4 SV=1;tr|A0A4X1SPV4|A0A4X1SPV4_PIG Uncharacterized protein	8	1	2.6	67.446	611	0.046953	1.2176	4	0	0	0	73843	100540	104670	0	0	0	539460	739372	465300	0	0	0
A0A5G2QBF9	Receptor activity-modifying protein 1	tr|A0A5G2QBF9|A0A5G2QBF9_PIG Receptor activity-modifying protein 1 OS=Sus scrofa OX=9823 GN=RAMP1 PE=3 SV=1;sp|Q867C0|RAMP1_PIG Receptor activity-modifying protein 1 OS=Sus scrofa OX=9823 GN=RAMP1 PE=2 SV=1;tr|A0A5S8KX83|A0A5S8KX83_PIG Receptor activity-mo	3	1	9.6	16.302	146	0.56123	0.22125	1	0	0	0	56565	6751.7	13807	0	0	0	0	0	0	0	0	0
Q9GK55	Receptor activity modifying protein 2 (Fragment)	tr|Q9GK55|Q9GK55_PIG Receptor activity modifying protein 2 (Fragment) OS=Sus scrofa OX=9823 GN=RAMP2 PE=4 SV=1	1	1	68.2	2.8502	22	0.26798	0.61178	0	23947	63576	7832.1	0	0	0	0	0	0	0	0	0	0	0	0
A0A5G2RDZ0	Receptor accessory protein 5	tr|A0A5G2RDZ0|A0A5G2RDZ0_PIG Receptor accessory protein 5 OS=Sus scrofa OX=9823 GN=REEP5 PE=1 SV=1;tr|A0A5G2QY56|A0A5G2QY56_PIG Receptor expression-enhancing protein OS=Sus scrofa OX=9823 GN=REEP5 PE=1 SV=1;tr|F1RLG5|F1RLG5_PIG Receptor expression-enhancin	4	1	15.2	10.473	99	0.58497	0.20202	1	0	0	0	0	0	0	135720	254410	44518	0	0	0	0	0	0
A0A4X1UKL7	RECA_2 domain-containing protein	tr|A0A4X1UKL7|A0A4X1UKL7_PIG RECA_2 domain-containing protein OS=Sus scrofa OX=9823 GN=XRCC2 PE=4 SV=1;tr|A0A287B280|A0A287B280_PIG DNA repair protein XRCC2 OS=Sus scrofa OX=9823 GN=XRCC2 PE=4 SV=1	2	1	3.6	31.892	280	0.035865	1.3206	1	0	0	0	0	0	0	0	0	0	1039200	917880	1265900	0	0	0
A0A287B0F7	REC114 meiotic recombination protein	tr|A0A287B0F7|A0A287B0F7_PIG REC114 meiotic recombination protein OS=Sus scrofa OX=9823 GN=REC114 PE=4 SV=1;tr|A0A4X1TIA3|A0A4X1TIA3_PIG Uncharacterized protein OS=Sus scrofa OX=9823 GN=REC114 PE=4 SV=1;tr|A0A287A9S6|A0A287A9S6_PIG Meiotic recombination pr	3	1	6.6	29.188	274	0.45798	0.33307	1	0	0	0	0	0	0	0	0	0	0	0	0	222230	910970	895630
F1S0M2	Reactive intermediate imine deaminase A homolog	tr|F1S0M2|F1S0M2_PIG Reactive intermediate imine deaminase A homolog OS=Sus scrofa OX=9823 GN=RIDA PE=1 SV=2;tr|A0A4X1U097|A0A4X1U097_PIG Uncharacterized protein OS=Sus scrofa OX=9823 GN=RIDA PE=3 SV=1;tr|A0A4X1TZT4|A0A4X1TZT4_PIG 2-iminobutanoate/2-iminop	4	1	14	11.742	114	0.51129	0.27707	3	0	0	0	48594	33304	32976	56701	62790	112100	0	0	0	0	0	0
A0A4X1V8Y2	RCR-type E3 ubiquitin transferase	tr|A0A4X1V8Y2|A0A4X1V8Y2_PIG RCR-type E3 ubiquitin transferase OS=Sus scrofa OX=9823 GN=MYCBP2 PE=3 SV=1;tr|A0A287AXI4|A0A287AXI4_PIG RCR-type E3 ubiquitin transferase OS=Sus scrofa OX=9823 GN=MYCBP2 PE=1 SV=1;tr|A0A4X1V765|A0A4X1V765_PIG RCR-type E3 ubiqu	10	3	0.8	509.54	4630	0.30062	0.55204	3	0	0	0	0	0	0	46586	73053	68585	5902400	6818900	3843400	0	0	0
A0A480TNK3	RCC1-like G exchanging factor-like protein isoform 1	tr|A0A480TNK3|A0A480TNK3_PIG RCC1-like G exchanging factor-like protein isoform 1 OS=Sus scrofa OX=9823 PE=4 SV=1	1	1	1.7	50.292	466	0.65491	0.069338	1	0	0	0	0	0	0	60773	42403	22247	0	0	0	0	0	0
A0A4X1TWT1	RBR-type E3 ubiquitin transferase	tr|A0A4X1TWT1|A0A4X1TWT1_PIG RBR-type E3 ubiquitin transferase OS=Sus scrofa OX=9823 GN=RNF19A PE=4 SV=1;sp|Q2VJ60|RN19A_PIG E3 ubiquitin-protein ligase RNF19A OS=Sus scrofa OX=9823 GN=RNF19A PE=2 SV=1;tr|H9BJ25|H9BJ25_PIG RBR-type E3 ubiquitin transferase	3	1	4	86.406	797	0.64169	0.10256	1	184945	145350	799330	0	0	0	87239	50680	34040	0	0	0	0	0	0
A0A4X1TJR6	RBPJ-interacting and tubulin-associated protein	tr|A0A4X1TJR6|A0A4X1TJR6_PIG RBPJ-interacting and tubulin-associated protein OS=Sus scrofa OX=9823 PE=3 SV=1;tr|A0A287BD58|A0A287BD58_PIG RBPJ-interacting and tubulin-associated protein OS=Sus scrofa OX=9823 GN=RITA1 PE=3 SV=1	2	1	4.3	32.739	300	0.44519	0.34578	1	779280	250190	897575	0	0	0	0	0	0	0	0	0	0	0	0
A0A480TX77	RB1-inducible coiled-coil protein 1 isoform X10	tr|A0A480TX77|A0A480TX77_PIG RB1-inducible coiled-coil protein 1 isoform X10 OS=Sus scrofa OX=9823 PE=4 SV=1;tr|A0A480JG29|A0A480JG29_PIG RB1-inducible coiled-coil protein 1 isoform 1 OS=Sus scrofa OX=9823 PE=4 SV=1;tr|A0A286ZKU3|A0A286ZKU3_PIG RB1 inducib	10	1	0.9	130.72	1140	0.57604	0.20769	1	404500	347040	172630	0	0	0	0	0	0	0	0	0	0	0	0
A0A287BQH3	RB transcriptional corepressor like 1	tr|A0A287BQH3|A0A287BQH3_PIG RB transcriptional corepressor like 1 OS=Sus scrofa OX=9823 GN=RBL1 PE=3 SV=2;tr|A0A287AAW9|A0A287AAW9_PIG RB transcriptional corepressor like 1 OS=Sus scrofa OX=9823 GN=RBL1 PE=3 SV=1;tr|F1SEM0|F1SEM0_PIG RB transcriptional co	7	1	1.1	112.61	999	0.34051	0.46493	1	0	0	0	0	0	0	0	0	0	0	0	0	1910600	824180	888260
A0A5G2RIG2	RB binding protein 7, chromatin remodeling factor	tr|A0A5G2RIG2|A0A5G2RIG2_PIG RB binding protein 7, chromatin remodeling factor OS=Sus scrofa OX=9823 GN=RBBP7 PE=1 SV=1;tr|F1SQR0|F1SQR0_PIG RB binding protein 7, chromatin remodeling factor OS=Sus scrofa OX=9823 GN=RBBP7 PE=1 SV=2;tr|A0A4X1UYR9|A0A4X1UYR9	8	1	3.1	47.422	418	0.0057971	2.261	18	41667	63262	28222	144900	157520	163920	129770	137820	66900	82431	66857	81148	40977	74620	76658
A0A5G2R1R8	RasGEF domain family member 1B	tr|A0A5G2R1R8|A0A5G2R1R8_PIG RasGEF domain family member 1B OS=Sus scrofa OX=9823 GN=RASGEF1B PE=4 SV=1;tr|A0A287BSU6|A0A287BSU6_PIG RasGEF domain family member 1B OS=Sus scrofa OX=9823 GN=RASGEF1B PE=4 SV=2;tr|A0A287ANN0|A0A287ANN0_PIG RasGEF domain famil	18	2	2.9	75.713	656	0.26353	0.62144	2	216500	230284	201010	0	0	0	23809	96029	126270	0	0	0	0	0	0
A0A287AVX1	RasGEF domain family member 1A	tr|A0A287AVX1|A0A287AVX1_PIG RasGEF domain family member 1A OS=Sus scrofa OX=9823 GN=RASGEF1A PE=4 SV=1	1	1	2.9	55.578	486	0.55216	0.2318	1	311460	540856	79452	0	0	0	0	0	0	33339	24569	120590	0	0	0
A0A287A9E4	RASD family member 2	tr|A0A287A9E4|A0A287A9E4_PIG RASD family member 2 OS=Sus scrofa OX=9823 GN=RASD2 PE=4 SV=1	1	1	4.6	34.103	303	0.39552	0.4071	1	0	0	0	0	0	0	0	0	0	4465100	2851300	2516000	0	0	0
Q06AU6	Ras-related protein Rab-5A	sp|Q06AU6|RAB5A_PIG Ras-related protein Rab-5A OS=Sus scrofa OX=9823 GN=RAB5A PE=2 SV=1	1	1	5.6	23.747	215	0.52782	0.25967	1	64339	21121	5686	0	0	0	0	0	0	0	0	0	0	0	0
A0A4X1TUA0	Ras-related protein Rab-34	tr|A0A4X1TUA0|A0A4X1TUA0_PIG Ras-related protein Rab-34 OS=Sus scrofa OX=9823 GN=RAB34 PE=4 SV=1;tr|A0A481CVC9|A0A481CVC9_PIG Ras-related protein Rab-34 OS=Sus scrofa OX=9823 GN=RAB34 PE=1 SV=1;tr|A0A480WL43|A0A480WL43_PIG Ras-related protein Rab-34 isofor	6	1	6.3	26.742	237	0.63229	0.12678	1	2740.3	72883	18594	0	0	0	0	0	0	0	0	0	0	0	0
A0A4X1SGP0	Ras-related protein Rab-3	tr|A0A4X1SGP0|A0A4X1SGP0_PIG Ras-related protein Rab-3 OS=Sus scrofa OX=9823 GN=RAB3C PE=3 SV=1;tr|A0A480L503|A0A480L503_PIG Ras-related protein Rab-3 OS=Sus scrofa OX=9823 PE=3 SV=1	2	1	6.2	25.682	225	0.24907	0.63435	1	0	0	0	0	0	0	44501	33108	13606	0	0	0	0	0	0
A0A4X1W0W9	Ras-related protein Rab-21	tr|A0A4X1W0W9|A0A4X1W0W9_PIG Ras-related protein Rab-21 OS=Sus scrofa OX=9823 GN=RAB21 PE=3 SV=1;tr|A0A287A4W6|A0A287A4W6_PIG Ras-related protein Rab-21 OS=Sus scrofa OX=9823 GN=TMEM19 PE=1 SV=1;tr|A0A287BED8|A0A287BED8_PIG Transmembrane protein 19 OS=Sus	5	1	4.5	24.132	222	0.16107	0.76247	3	0	0	0	0	0	0	86957	49889	69041	40428	169128	103080	0	0	0
A0A287BPB8	Ras-related protein Rab-14	tr|A0A287BPB8|A0A287BPB8_PIG Ras-related protein Rab-14 OS=Sus scrofa OX=9823 GN=RAB14 PE=4 SV=1;sp|Q52NJ6|RAB14_PIG Ras-related protein Rab-14 OS=Sus scrofa OX=9823 GN=RAB14 PE=2 SV=3;tr|A0A4X1UKV3|A0A4X1UKV3_PIG Ras-related protein Rab-14 OS=Sus scrofa O	3	1	15.2	21.888	197	0.25778	0.6296	1	0	0	0	0	0	0	172370	140870	126970	0	0	0	0	0	0
A0A4X1TE59	Ras-related protein Rab-11A	tr|A0A4X1TE59|A0A4X1TE59_PIG Ras-related protein Rab-11A OS=Sus scrofa OX=9823 GN=RAB11A PE=4 SV=1;tr|A0A5G2RBP9|A0A5G2RBP9_PIG Uncharacterized protein OS=Sus scrofa OX=9823 GN=RAB11B PE=1 SV=1;tr|A0A4X1VH74|A0A4X1VH74_PIG Uncharacterized protein OS=Sus sc	11	4	26.6	17.503	154	0.0019763	4.8036	30	182880	247930	160594	217820	157550	253330	230500	179070	173236	306120	313160	260340	151500	331950	167708
A0A4X1VR77	Ras-related protein Rab	tr|A0A4X1VR77|A0A4X1VR77_PIG Ras-related protein Rab OS=Sus scrofa OX=9823 PE=3 SV=1	1	1	4.9	33.186	304	0.54254	0.24234	1	0	0	0	125100	105630	96967	0	0	0	0	0	0	0	0	0
A0A4X1UBJ9	Ras-GAP domain-containing protein	tr|A0A4X1UBJ9|A0A4X1UBJ9_PIG Ras-GAP domain-containing protein OS=Sus scrofa OX=9823 PE=4 SV=1;tr|F1S6Y8|F1S6Y8_PIG RAS protein activator like 2 OS=Sus scrofa OX=9823 GN=RASAL2 PE=1 SV=4	2	1	1.4	124.86	1108	0.28157	0.58827	1	0	0	0	0	0	0	0	0	0	32164	20779	116590	0	0	0
A0A5G2QRF4	Ras protein specific guanine nucleotide releasing factor 2	tr|A0A5G2QRF4|A0A5G2QRF4_PIG Ras protein specific guanine nucleotide releasing factor 2 OS=Sus scrofa OX=9823 GN=RASGRF2 PE=4 SV=1;tr|A0A287AJA6|A0A287AJA6_PIG Ras protein specific guanine nucleotide releasing factor 2 OS=Sus scrofa OX=9823 GN=RASGRF2 PE=4	7	1	1	127.21	1120	0.60853	0.17165	1	0	0	0	0	0	0	197020	190240	140020	0	0	0	0	0	0
I3LBP8	Ras like without CAAX 1	tr|I3LBP8|I3LBP8_PIG Ras like without CAAX 1 OS=Sus scrofa OX=9823 GN=RIT1 PE=4 SV=2;tr|K9J6L6|K9J6L6_PIG GTP-binding protein Rit1 OS=Sus scrofa OX=9823 GN=RIT1 PE=2 SV=1;tr|A0A4X1W166|A0A4X1W166_PIG Uncharacterized protein OS=Sus scrofa OX=9823 GN=RIT1 PE	5	1	5.2	24.626	213	0.60026	0.18222	1	0	0	0	130880	629740	120475	0	0	0	0	0	0	0	0	0
A0A5G2QB26	RAS like family 12	tr|A0A5G2QB26|A0A5G2QB26_PIG RAS like family 12 OS=Sus scrofa OX=9823 GN=RASL12 PE=4 SV=1;tr|A0A4X1TJR8|A0A4X1TJR8_PIG Uncharacterized protein OS=Sus scrofa OX=9823 GN=RASL12 PE=4 SV=1;tr|A0A4X1TJI6|A0A4X1TJI6_PIG Uncharacterized protein OS=Sus scrofa OX=9	4	1	4.5	27.405	247	0.53252	0.25485	1	0	0	0	0	0	0	0	0	0	529710	531160	711840	0	0	0
[truncated: 2,968 more rows]
