# Supplementary material for: Proteomic landscape of porcine induced neural stem cell reprogramming and differentiation
Source: PeerJ. 2025 Oct 3;13:e20120. doi: 10.7717/peerj.20120 (PMC12499565; doi:10.7717/peerj.20120)
Supplement: Supplemental Information 2 [file peerj-13-20120-s002.xlsx]

## Sheet: Sheet1
Enrichment FDR	nGenes	Pathway Genes	Fold Enrichment	Pathway	URL	Genes
4.41988e-15	260	1398	1.70515	Cytoskeleton	http://amigo.geneontology.org/amigo/term/GO:0005856	TUBA1A KRT84 MYO1A BICD1 CCDC77 MAK TUBB PHF1 PKHD1 CFL2 MMP14 SIPA1L1 BBOF1 DLST NEK9 CEP128 GAS8 CFAP20 LSM14A ARHGAP35 RUVBL2 ATF5 FBLIM1 RCC2 KIF17 NUDC WASF2 EPB41 MAP7D1 CAP1 CEP192 MTCL1 EPB41L3 SS18 MAPRE2 TCP1 EPB41L2 MDN1 FILIP1 CCDC68 TPM1 MYO1E LEO1 TMOD2 EPB42 NDN VPS4B DLGAP5 CNTLN JAK2 PGM5 ANXA1 FRMPD1 ODF2 SPATC1 LRRCC1 CSPP1 DDR2 SPTA1 NES CCT3 LMNA RUSC1 CGN TMOD4 DCLRE1B CNN3 …
4.41988e-15	176	826	1.95357	Nuclear protein-containing complex	http://amigo.geneontology.org/amigo/term/GO:0140513	XRCC6 EP300 SUN2 NUP107 COPS7A CECR2 SNRPF PRPF4B JARID2 PHF1 SNRPC CDKN1A BICRAL HSP90AB1 SIN3A CEBPA SAE1 RUVBL2 TSEN34 INTS11 RPA2 SF3A3 SS18 TAF4B DOCK7 CDC20 ARID1B EPB41L2 CCNC ASCC3 CDC40 HDAC2 ATP5F1A ICE2 TCF12 LEO1 COPS2 INO80 INTS14 FANCM EXOSC3 SNRPA1 PEX2 TERF1 COPS5 TCEA1 UBAP2L RPAP2 GTF2B UBE2C ACTB CD2BP2 ERCC4 ELOB ZC3H8 FANCL DPY30 CDK8 DIS3 ZCCHC8 DYNLL1 SART3 PES1 SNRPD3 SMAR…
4.97237e-15	331	1919	1.58143	Cellular component biogenesis	http://amigo.geneontology.org/amigo/term/GO:0044085	PARVB PACSIN2 SNU13 EP300 ACVRL1 TESPA1 MYO1A MDM1 NUP107 PTPRO COPS7A ACRBP PPHLN1 AMIGO2 SNRPF RIPK1 MAK H1-3 TUBB SNRPC HSP90AB1 PKHD1 CFL2 IPO4 CCNB1IP1 GLRX5 HSP90AA1 GAS8 CDH13 CENPT E2F4 CFAP20 LSM14A ARHGAP35 NR1H2 PARK7 FBLIM1 RCC2 UBXN10 WASF2 SF3A3 CEP192 ADGRL2 CTH CDC20 CCN2 RIMS1 SPACA1 MDN1 GJA10 TPM1 TMOD2 CAPN3 INO80 RAD51 TJP1 VPS4B LRFN5 RPS6 PSIP1 RCL1 KCNV2 EXOSC3 MRPS2 YWHAZ…
1.6925e-14	51	125	3.74073	Ribosome	http://www.genome.jp/kegg-bin/show_pathway?ssc03010	RPS18 RPS19 RPS11 RPL22 RPS8 RPL4 RPLP1 RPS6 MRPS2 RPL30 RPS3A RPL21 RPL24 RPLP2 MRPL11 RPS28 MRPL4 RPL18A RPL27A RPS3 RPL19 RPS21 RPS27L RPL11 RPL13 RPL27 RPL18 RPS17 RPL29 RPL26 RPS9 RPS7 MRPS14 NUDT3 RPL7 MRPL12 RPS15 RPS2 RPL35 RPL17 RPL23A RPS15A RPL32 RPL7A RPL10 RPS25 RPL15 RPL23 RPL28 RPS24 RPL3
6.18885e-13	259	1455	1.63205	Regulation of cellular component organization	http://amigo.geneontology.org/amigo/term/GO:0051128	PACSIN2 EP300 ACVRL1 MDM1 BICD1 PTPRO PPHLN1 AMIGO2 MAK TUBB SLC44A4 CDKN1A PKHD1 SIN3A CPLX3 CFL2 MMP14 SIPA1L1 RIN3 HSP90AA1 CDH13 PDCD5 ARHGAP35 ATF5 NR1H2 PARK7 DRAXIN PDPN FBLIM1 RCC2 GRHL3 WASF2 EPB41L3 MAPRE2 ADGRL2 OMA1 CDC20 MAP3K4 TCP1 CCN2 RIMS1 TTK TMOD2 INO80 TJP1 VPS4B LRFN5 BMP4 ANXA1 IGFBPL1 TRIM32 MTBP YWHAZ TERF1 TOX SDCBP DDR2 PFDN2 IGSF9 CRABP2 CCT3 LMNA TMOD4 RHOC ELAPOR1 DNA…
6.57424e-13	141	646	2.00117	Peptide metabolic process	http://amigo.geneontology.org/amigo/term/GO:0006518	RPS18 GSTZ1 LSM14A EIF3K RPS19 RPS11 RPL22 PARK7 PARS2 RPS8 PNLDC1 RARS2 EEF1A1 SCG5 RPL4 RPLP1 LARP6 RPS6 CARNMT1 EXOSC3 MRPS2 EIF3E RIDA EEF1D TUFM TRAP1 PTCD3 LRPPRC RPS3A HPGDS RPL21 CLU DENR IDE MRPL43 NOLC1 SAMD4B VIM DALRD3 EIF2A FXR1 EIF2B5 RPL24 GSPT2 RPLP2 CARNS1 MRPL11 RELA MRPL49 EEF1G EIF3M EIF4G2 ELAVL1 RPS28 MRPL4 FARSA CALR NANOS3 RPL18A EIF4E1B PAM ETF1 TCOF1 RPL27A RPS3 NARS2 DC…
1.19785e-12	105	428	2.24927	MRNA metabolic process	http://amigo.geneontology.org/amigo/term/GO:0016071	DDX17 SNRPF PRPF4B DXO SNRPC SRSF3 ZC3H14 RBM42 DHX34 SF3A3 PABPC4 PNLDC1 WTAP CDC40 LEO1 PSIP1 EXOSC3 SNRPA1 EIF3E RIDA VIRMA RBM39 RNPS1 SRSF7 PUM2 RBM26 SART3 SNRPD3 CSTF2T SAMD4B HNRNPU VIM RBM15B DNAJB11 THOC2 RBMX CPSF7 PRR5L DAZAP1 LSM7 KHSRP ELAVL1 DDX39A AKAP8L CLNS1A CWC15 DCPS ANGEL2 SF3B1 FASTKD2 ZC3HAV1 NPM1 AXIN2 EFTUD2 MEIOC STAT3 SRSF1 GCFC2 LSM8 TIRAP DCP1A PRDX6 HNRNPK SNW1 HTAT…
1.23925e-12	301	1778	1.55214	Cellular component assembly	http://amigo.geneontology.org/amigo/term/GO:0022607	PARVB PACSIN2 EP300 ACVRL1 TESPA1 MYO1A MDM1 NUP107 PTPRO COPS7A ACRBP AMIGO2 SNRPF RIPK1 MAK H1-3 TUBB SNRPC HSP90AB1 PKHD1 CFL2 IPO4 CCNB1IP1 GLRX5 HSP90AA1 GAS8 CDH13 CENPT E2F4 CFAP20 LSM14A ARHGAP35 NR1H2 PARK7 FBLIM1 RCC2 UBXN10 WASF2 SF3A3 CEP192 ADGRL2 CTH CDC20 CCN2 RIMS1 SPACA1 MDN1 GJA10 TPM1 TMOD2 CAPN3 INO80 RAD51 TJP1 VPS4B LRFN5 PSIP1 KCNV2 MRPS2 YWHAZ TERF1 SDCBP CASQ1 CCT3 UBAP2L…
7.61502e-12	119	527	2.0703	Translation	http://amigo.geneontology.org/amigo/term/GO:0006412	RPS18 LSM14A EIF3K RPS19 RPS11 RPL22 PARS2 RPS8 PNLDC1 RARS2 EEF1A1 RPL4 RPLP1 LARP6 RPS6 EXOSC3 MRPS2 EIF3E RIDA EEF1D TUFM TRAP1 PTCD3 LRPPRC RPS3A RPL21 DENR MRPL43 NOLC1 SAMD4B VIM DALRD3 EIF2A FXR1 EIF2B5 RPL24 GSPT2 RPLP2 MRPL11 MRPL49 EEF1G EIF3M EIF4G2 ELAVL1 RPS28 MRPL4 FARSA CALR NANOS3 RPL18A EIF4E1B ETF1 TCOF1 RPL27A RPS3 NARS2 DCPS NIBAN1 TPR EEF1B2 FASTKD2 NPM1 STAT3 RPL19 RPS21 DCP…
7.89339e-12	159	788	1.84998	Cellular amide metabolic process	http://amigo.geneontology.org/amigo/term/GO:0043603	RPS18 HEXA GSTZ1 CEBPA LSM14A EIF3K RPS19 RPS11 RPL22 ACOT7 PARK7 PARS2 RPS8 PNLDC1 RARS2 EEF1A1 SCG5 RPL4 RPLP1 LARP6 RPS6 CARNMT1 EXOSC3 MRPS2 EIF3E RIDA CERS2 CCN1 EEF1D ACSS1 TUFM TRAP1 PTCD3 LRPPRC NAAA RPS3A HPGDS RPL21 CLU DENR IDE PGAM1 MRPL43 NOLC1 SAMD4B VIM OXSM DALRD3 EIF2A FXR1 EIF2B5 RPL24 GSPT2 RPLP2 CARNS1 MRPL11 RELA MRPL49 EEF1G EIF3M EIF4G2 ELAVL1 RPS28 MRPL4 FARSA CALR NANOS3 …
1.17133e-11	121	544	2.03931	Peptide biosynthetic process	http://amigo.geneontology.org/amigo/term/GO:0043043	RPS18 LSM14A EIF3K RPS19 RPS11 RPL22 PARS2 RPS8 PNLDC1 RARS2 EEF1A1 RPL4 RPLP1 LARP6 RPS6 EXOSC3 MRPS2 EIF3E RIDA EEF1D TUFM TRAP1 PTCD3 LRPPRC RPS3A RPL21 DENR MRPL43 NOLC1 SAMD4B VIM DALRD3 EIF2A FXR1 EIF2B5 RPL24 GSPT2 RPLP2 CARNS1 MRPL11 MRPL49 EEF1G EIF3M EIF4G2 ELAVL1 RPS28 MRPL4 FARSA CALR NANOS3 RPL18A EIF4E1B ETF1 TCOF1 RPL27A RPS3 NARS2 DCPS NIBAN1 TPR EEF1B2 FASTKD2 NPM1 STAT3 RPL19 RP…
1.53698e-11	297	1787	1.5238	Cellular localization	http://amigo.geneontology.org/amigo/term/GO:0051641	PACSIN2 SUN2 ESYT1 MYO1A NUP107 BICD1 PPHLN1 ITPR3 SRSF3 CDKN1A TFEB HSP90AB1 PKHD1 ABHD17C SIN3A CPLX3 IPO4 MMP14 AKAP5 GPHN NPC2 VIPAS39 CCDC88C HSP90AA1 GAS8 ATP2C2 CDH13 AP1G1 PDCD5 YIF1B KDELR1 RUVBL2 PARK7 RCC2 KIF17 NUDC RPA2 EPB41 CEP192 ANKRD13C LEPROT TCP1 EPB41L2 RIMS1 SNX3 TTK ATP5F1A AP4E1 CAPN3 TMEM87A SCG5 VPS4B BMP4 CNTLN FRMPD1 RAB14 MTBP YWHAZ PEX2 TERF1 ARMC1 CD84 COPA CASQ1 CC…
1.57937e-11	314	1917	1.50177	Negative regulation of metabolic process	http://amigo.geneontology.org/amigo/term/GO:0009892	XRCC6 EP300 ACVRL1 RARG SARNP CNPY2 PTPRO YBX3 PPHLN1 PARPBP RIPK1 JARID2 DXO PHF1 CDKN1A HSP90AB1 RUNX2 SIN3A ARG2 ZC3H14 RIN3 LGMN GSC THAP11 CEBPA LSM14A RBM42 ZBTB32 IRF2BP1 DHX34 ATF5 NR1H2 PARK7 PABPC4 CEP192 CC2D1B PNLDC1 ZBTB2 CITED2 CCN2 NCOA7 SNX3 HDAC2 CD109 COPS2 CAPN3 NDN BMP4 ANXA1 EXOSC3 ZHX1 TRPS1 EIF3E RIDA PEX2 TERF1 SDCBP PFDN2 CD84 HDGF PBXIP1 FERMT1 SLC24A3 DDRGK1 RBL1 YWHAB …
1.88292e-11	184	970	1.73917	Catalytic complex	http://amigo.geneontology.org/amigo/term/GO:1902494	EP300 CECR2 DYRK2 PRPF4B RIPK1 JARID2 PHF1 CDKN1A BICRAL POLG SIN3A ERH DLST FBXO9 FBXO31 POP4 SAE1 RUVBL2 TSEN34 UBE4B SF3A3 SS18 TAF4B CDC20 ARID1B CDC40 HDAC2 LEO1 INO80 PSMC6 EXOSC3 SNRPA1 VIRMA PEX2 TCEA1 PSMD4 RPAP2 GTF2B DNAI3 SPTLC3 UBE2C ACTB POP7 UQCRC2 ELOB DPY30 PPP1CB NAA15 DIS3 CUL4A PPP2R2A DNAH10 ZCCHC8 DYNLL1 SMARCB1 KLHL22 DNA2 EXOSC1 BCCIP HNRNPU NAA35 NDUFB6 PRKAR2A RBM15B WDR…
5.39957e-11	58	187	2.84369	Regulation of mRNA metabolic process	http://amigo.geneontology.org/amigo/term/GO:1903311	DDX17 SRSF3 ZC3H14 RBM42 DHX34 PABPC4 PNLDC1 WTAP LEO1 EXOSC3 RIDA VIRMA RBM39 RNPS1 SRSF7 PUM2 SAMD4B HNRNPU VIM RBM15B RBMX CPSF7 PRR5L DAZAP1 ELAVL1 DCPS ANGEL2 FASTKD2 ZC3HAV1 NPM1 AXIN2 MEIOC TIRAP DCP1A PRDX6 HNRNPK SNW1 KHDRBS1 TARDBP IGF2BP1 TIA1 SNRNP70 FASTK CARHSP1 NCBP2 YTHDF2 SECISBP2 YBX1 RBM8A THRAP3 TRA2B DDX5 U2AF2 C1QBP IWS1 JMJD6 SRSF10 YTHDF1
8.34715e-11	129	613	1.92942	Amide biosynthetic process	http://amigo.geneontology.org/amigo/term/GO:0043604	RPS18 CEBPA LSM14A EIF3K RPS19 RPS11 RPL22 PARS2 RPS8 PNLDC1 RARS2 EEF1A1 RPL4 RPLP1 LARP6 RPS6 EXOSC3 MRPS2 EIF3E RIDA CERS2 CCN1 EEF1D ACSS1 TUFM TRAP1 PTCD3 LRPPRC RPS3A RPL21 DENR MRPL43 NOLC1 SAMD4B VIM DALRD3 EIF2A FXR1 EIF2B5 RPL24 GSPT2 RPLP2 CARNS1 MRPL11 MRPL49 EEF1G EIF3M EIF4G2 ELAVL1 RPS28 MRPL4 FARSA CALR NANOS3 RPL18A EIF4E1B ETF1 TCOF1 RPL27A RPS3 NARS2 DCPS NIBAN1 TPR EEF1B2 FAST…
1.28724e-10	287	1746	1.50707	Negative regulation of macromolecule metabolic process	http://amigo.geneontology.org/amigo/term/GO:0010605	XRCC6 EP300 ACVRL1 RARG SARNP CNPY2 PTPRO YBX3 PPHLN1 PARPBP RIPK1 JARID2 DXO PHF1 CDKN1A HSP90AB1 RUNX2 SIN3A ARG2 ZC3H14 RIN3 LGMN GSC THAP11 CEBPA LSM14A RBM42 ZBTB32 IRF2BP1 DHX34 ATF5 NR1H2 PARK7 PABPC4 CC2D1B PNLDC1 ZBTB2 CITED2 CCN2 NCOA7 SNX3 HDAC2 CD109 COPS2 CAPN3 NDN BMP4 ANXA1 EXOSC3 ZHX1 TRPS1 EIF3E RIDA PEX2 TERF1 SDCBP PFDN2 CD84 HDGF PBXIP1 FERMT1 SLC24A3 DDRGK1 RBL1 YWHAB PFDN4 M…
2.35244e-10	203	1134	1.64127	Organonitrogen compound biosynthetic process	http://amigo.geneontology.org/amigo/term/GO:1901566	ATP5F1B RPS18 MOCS1 GPHN CEBPA LSM14A EIF3K RPS19 RPS11 RPL22 ACOT7 PARK7 ACADM CTH PARS2 RPS8 CTPS1 PNLDC1 MTHFD1L NT5E RARS2 AMD1 EEF1A1 ATP5F1A RPL4 RPLP1 LARP6 RPS6 EXOSC3 MRPS2 EIF3E RIDA SPTA1 CERS2 PHGDH CCN1 EEF1D SPTLC3 ACSS1 PANK2 PSPH TUFM XYLT1 TRAP1 PTCD3 SPR LRPPRC PAICS RPS3A MTTP RPL21 UGGT2 DENR MTR CSGALNACT2 ADK MRPL43 NOLC1 SAMD4B VIM DALRD3 QRICH1 EOGT GXYLT2 RPN1 EIF2A FXR1 …
2.38567e-10	268	1613	1.52334	Negative regulation of cellular metabolic process	http://amigo.geneontology.org/amigo/term/GO:0031324	XRCC6 EP300 ACVRL1 RARG SARNP PTPRO YBX3 PPHLN1 PARPBP JARID2 PHF1 CDKN1A HSP90AB1 RUNX2 SIN3A ZC3H14 RIN3 GSC THAP11 CEBPA LSM14A RBM42 ZBTB32 IRF2BP1 DHX34 ATF5 NR1H2 PARK7 CEP192 CC2D1B PNLDC1 ZBTB2 CITED2 NCOA7 HDAC2 CD109 COPS2 CAPN3 NDN BMP4 EXOSC3 ZHX1 TRPS1 RIDA PEX2 TERF1 SDCBP HDGF PBXIP1 DDRGK1 RBL1 YWHAB MAFK CD2BP2 ERCC4 TRAP1 RNPS1 ZC3H8 ARID5A ATOH8 LRPPRC SRSF7 EMILIN1 YWHAQ SLIT2…
2.4213e-10	148	751	1.80683	RNA binding	http://amigo.geneontology.org/amigo/term/GO:0003723	SNU13 EP300 TUBA1A YBX3 SKIV2L RPS18 SNRPC SRSF3 HSP90AB1 ZC3H14 POP4 LSM14A EIF3K PUSL1 PARK7 EIF3I SF3A3 PABPC4 SERBP1 EEF1A1 EIF3J LARP6 EXOSC3 TRIM32 EIF3E RIDA RPL30 EEF1D RBM39 POP7 TUFM RNPS1 PTCD3 PAPOLG LRPPRC PUM2 RBM46 DIS3 PSPC1 AUH RAN DENR ZCCHC8 OASL SART3 EWSR1 TARBP1 CSTF2T EXOSC1 SAMD4B HNRNPU APTX VIM CELF2 DALRD3 RBM15B EIF2A FXR1 EIF2B5 IGF2BP2 RBBP7 HSD17B10 RBMX DKC1 EEF1G …
2.4213e-10	167	881	1.73795	Intracellular transport	http://amigo.geneontology.org/amigo/term/GO:0046907	SUN2 NUP107 BICD1 SRSF3 CDKN1A IPO4 AKAP5 NPC2 VIPAS39 CCDC88C HSP90AA1 AP1G1 PDCD5 YIF1B PARK7 KIF17 RIMS1 SNX3 ATP5F1A AP4E1 TMEM87A SCG5 VPS4B BMP4 RAB14 YWHAZ PEX2 COPA LMNA FERMT1 SEC23B MYLK2 YWHAB VAPB AP5Z1 STX1A IFT140 PKD1 GCC2 PEX13 DPY30 SPAST YWHAQ USO1 LAMP1 RAN RPH3A CORO1C YWHAH UFD1 ACTN2 LYST VPS26A SEC24C AP3M1 BLOC1S2 CCDC186 BAG3 WDR11 HNRNPU KIF5B PIP4K2A MYRIP RBM15B GRIP2 …
4.70454e-10	58	198	2.68571	RNA splicing, via transesterification reactions	http://amigo.geneontology.org/amigo/term/GO:0000375	DDX17 SNRPF PRPF4B SNRPC SRSF3 RBM42 SF3A3 WTAP CDC40 PSIP1 SNRPA1 RBM39 RNPS1 SRSF7 SART3 SNRPD3 HNRNPU RBM15B RBMX DAZAP1 LSM7 DDX39A CLNS1A CWC15 DCPS SF3B1 NPM1 EFTUD2 SRSF1 GCFC2 LSM8 PRDX6 HNRNPK SNW1 HTATSF1 KHDRBS1 SRRM2 TIA1 SNRPE SNRNP70 SNRPG NCBP2 RBM8A THRAP3 TRA2B USP39 DDX5 SNRPD2 U2AF2 NOVA2 C1QBP PHF5A SFPQ JMJD6 SRSF10 CRNKL1 LSM2 MFAP1
4.70454e-10	58	198	2.68571	RNA splicing, via transesterification reactions with bulged adenosine as nucleophile	http://amigo.geneontology.org/amigo/term/GO:0000377	DDX17 SNRPF PRPF4B SNRPC SRSF3 RBM42 SF3A3 WTAP CDC40 PSIP1 SNRPA1 RBM39 RNPS1 SRSF7 SART3 SNRPD3 HNRNPU RBM15B RBMX DAZAP1 LSM7 DDX39A CLNS1A CWC15 DCPS SF3B1 NPM1 EFTUD2 SRSF1 GCFC2 LSM8 PRDX6 HNRNPK SNW1 HTATSF1 KHDRBS1 SRRM2 TIA1 SNRPE SNRNP70 SNRPG NCBP2 RBM8A THRAP3 TRA2B USP39 DDX5 SNRPD2 U2AF2 NOVA2 C1QBP PHF5A SFPQ JMJD6 SRSF10 CRNKL1 LSM2 MFAP1
4.70454e-10	248	1475	1.54154	Negative regulation of nitrogen compound metabolic process	http://amigo.geneontology.org/amigo/term/GO:0051172	XRCC6 EP300 ACVRL1 RARG SARNP PTPRO YBX3 PPHLN1 PARPBP JARID2 PHF1 CDKN1A HSP90AB1 RUNX2 SIN3A ZC3H14 GSC THAP11 CEBPA LSM14A RBM42 ZBTB32 IRF2BP1 DHX34 ATF5 NR1H2 PARK7 CC2D1B PNLDC1 ZBTB2 CITED2 NCOA7 SNX3 HDAC2 CD109 COPS2 CAPN3 NDN BMP4 EXOSC3 ZHX1 TRPS1 RIDA PEX2 TERF1 SDCBP PFDN2 CD84 HDGF PBXIP1 DDRGK1 RBL1 YWHAB PFDN4 MAFK ERCC4 RNPS1 ZC3H8 ARID5A ATOH8 LRPPRC SRSF7 EMILIN1 YWHAQ SLIT2 DA…
4.70454e-10	58	198	2.68571	MRNA splicing, via spliceosome	http://amigo.geneontology.org/amigo/term/GO:0000398	DDX17 SNRPF PRPF4B SNRPC SRSF3 RBM42 SF3A3 WTAP CDC40 PSIP1 SNRPA1 RBM39 RNPS1 SRSF7 SART3 SNRPD3 HNRNPU RBM15B RBMX DAZAP1 LSM7 DDX39A CLNS1A CWC15 DCPS SF3B1 NPM1 EFTUD2 SRSF1 GCFC2 LSM8 PRDX6 HNRNPK SNW1 HTATSF1 KHDRBS1 SRRM2 TIA1 SNRPE SNRNP70 SNRPG NCBP2 RBM8A THRAP3 TRA2B USP39 DDX5 SNRPD2 U2AF2 NOVA2 C1QBP PHF5A SFPQ JMJD6 SRSF10 CRNKL1 LSM2 MFAP1
4.70454e-10	216	1240	1.59709	Establishment of localization in cell	http://amigo.geneontology.org/amigo/term/GO:0051649	SUN2 NUP107 BICD1 ITPR3 SRSF3 CDKN1A PKHD1 CPLX3 IPO4 AKAP5 NPC2 VIPAS39 CCDC88C HSP90AA1 AP1G1 PDCD5 YIF1B PARK7 KIF17 NUDC RIMS1 SNX3 ATP5F1A AP4E1 CAPN3 TMEM87A SCG5 VPS4B BMP4 RAB14 YWHAZ PEX2 TERF1 CD84 COPA CASQ1 LMNA FERMT1 SEC23B NSFL1C MYLK2 YWHAB VAPB AP5Z1 ACTB TFR2 STX1A IFT140 PKD1 GCC2 PEX13 DPY30 SPAST YWHAQ USO1 SPRY2 LAMP1 RAN RPH3A CORO1C YWHAH UFD1 RYR2 ACTN2 LYST VPS26A SEC24C…
4.92428e-10	18	25	6.60129	PW:0000101 translation pathway	ftp://ftp.rgd.mcw.edu/pub/data_release	RPS11 RPS8 RPL4 RPS6 RPL30 RPL21 RPS28 RPS3 RPL29 RPL26 RPS9 RPS7 RPL23A RPS15A RPL32 RPL7A RPL15 RPL28
7.35188e-10	73	284	2.35668	MRNA processing	http://amigo.geneontology.org/amigo/term/GO:0006397	DDX17 SNRPF PRPF4B SNRPC SRSF3 ZC3H14 RBM42 SF3A3 WTAP CDC40 LEO1 PSIP1 SNRPA1 VIRMA RBM39 RNPS1 SRSF7 RBM26 SART3 SNRPD3 CSTF2T HNRNPU RBM15B THOC2 RBMX CPSF7 DAZAP1 LSM7 DDX39A AKAP8L CLNS1A CWC15 DCPS SF3B1 NPM1 EFTUD2 SRSF1 GCFC2 LSM8 PRDX6 HNRNPK SNW1 HTATSF1 KHDRBS1 TARDBP SRRM2 TIA1 SNRPE SNRNP70 SNRPG NCBP2 RBM8A THRAP3 TRA2B USP39 SMNDC1 CLP1 DDX5 SNRPD2 U2AF2 NOVA2 C1QBP PHF5A IWS1 SFPQ…
1.21999e-09	241	1439	1.53551	Protein localization	http://amigo.geneontology.org/amigo/term/GO:0008104	PACSIN2 SUN2 MON2 BICD1 PPHLN1 CDKN1A HSP90AB1 ABHD17C SIN3A SCAMP2 CPLX3 AP4S1 IPO4 MMP14 AKAP5 GPHN VIPAS39 CEP128 HSP90AA1 GAS8 ATP2C2 AP1G1 PDCD5 YIF1B KDELR1 RUVBL2 NR1H2 PARK7 RCC2 RPA2 EPB41 CEP192 ANKRD13C LEPROT TCP1 EPB41L2 RIMS1 SNX3 TTK CCDC68 AP4E1 CAPN3 SCG5 TJP1 BMP4 CNTLN FRMPD1 RAB14 ODF2 MTBP YWHAZ PEX2 TERF1 COPA CCT3 GLMP LMNA FERMT1 SEC23B DDRGK1 NSFL1C YWHAB SNX21 ACTB TFR2 …
1.33879e-09	171	931	1.684	Cell cycle	http://amigo.geneontology.org/amigo/term/GO:0007049	MDM1 TUBB CDKN1A HSP90AB1 PKHD1 SIN3A TGM1 CCNB1IP1 ERH LGMN PPP1R13B FBXO31 CENPT E2F4 CEBPA LSM14A ATF5 RCC2 NUDC RPA2 CEP192 CABLES1 CDC20 SMOC2 CITED2 TTK CAPN3 INO80 RAD51 IVD VPS4B FANCM BMP4 RPS6 CNTLN ANXA1 TRIM32 ODF2 MTBP TERF1 CSPP1 COPS5 SDCBP NES LMNA CRNN PHGDH RHOC NSFL1C RBL1 UBE2C RTF2 PKD1 SPAST SPDYA GEN1 DACH1 SPRY2 CUL4A RAN MN1 TTC28 PES1 DRG1 DNA2 CEP55 BCCIP BRINP3 HNRNPU …
2.80753e-09	259	1587	1.4963	Regulation of protein metabolic process	http://amigo.geneontology.org/amigo/term/GO:0051246	XRCC6 EP300 ACVRL1 PTPRO PPP6R2 RIPK1 JARID2 GPLD1 PHF1 CDKN1A HSP90AB1 SIN3A ARRDC4 CCDC88C LGMN HSP90AA1 PDCD5 LSM14A EIF3K SAE1 RUVBL2 NR1H2 PARK7 DOCK7 CDC20 MAP3K4 PNLDC1 NCOA7 SNX3 HDAC2 CD109 CAPN3 RAD51 NDN CCBE1 LARP6 FANCM BMP4 EXOSC3 TRIM32 MTBP EIF3E RIDA SDCBP DDR2 PFDN2 CD84 LMNA CCN1 DLC1 DDRGK1 YWHAB PFDN4 CASS4 TFR2 TRAP1 PKD1 ANTXR1 LRPPRC SPDYA EMILIN1 SLIT2 SPRY2 CUL4A SEMA4D …
2.88595e-09	170	933	1.67057	Cytoskeleton organization	http://amigo.geneontology.org/amigo/term/GO:0007010	PARVB PACSIN2 SUN2 TUBA1A MDM1 BICD1 TUBB DAAM2 PKHD1 CFL2 SIPA1L1 GAS8 LSM14A ARHGAP35 ATF5 GRHL3 NUDC WASF2 EPB41 MAP7D1 CAP1 CEP192 EPB41L3 SS18 DOCK7 CDC20 CCN2 EPB41L2 CCDC68 TPM1 TMOD2 CAPN3 INO80 IVD TJP1 VPS4B CNTLN ANXA1 TRIM32 ODF2 SDCBP PFDN2 CASQ1 SPTA1 LMNA TMOD4 RHOC STRIP1 CNN3 DNAI3 DLC1 NSFL1C CASS4 ACTB ARPC1B PKD1 GCC2 CTNNA2 ANTXR1 SPAST GEN1 SLIT2 SLAIN2 FHDC1 SPRY2 RAN HIP1R…
4.40493e-09	129	653	1.81123	Cytoskeletal protein binding	http://amigo.geneontology.org/amigo/term/GO:0008092	PARVB PACSIN2 MYO1A MDM1 BICD1 MYBPC1 DAAM2 HSP90AB1 CFL2 HSP90AA1 GAS8 AP1G1 PDCD5 ATF5 KIF1B FBLIM1 RCC2 KIF17 WASF2 EPB41 CAP1 MTCL1 EPB41L3 MAPRE2 EPB41L2 TPM1 MYO1E TMOD2 CAPN3 INO80 NDN LARP6 TRIM32 RAB14 KIRREL1 RUSC1 TMOD4 CNN3 POLB FERMT1 TNNC2 VAPB ACTB ARPC1B CTNNA2 ANTXR1 LRPPRC SPAST AGBL5 DPYSL5 FHDC1 HSPH1 CLU HIP1R ARPC3 CORO1C DRG1 YWHAH ACTN2 BLOC1S2 PKD2L1 ABLIM1 HNRNPU KIF5B N…
4.76966e-09	119	587	1.85868	RNA processing	http://amigo.geneontology.org/amigo/term/GO:0006396	DDX17 SNRPF PRPF4B RIPK1 SNRPC SRSF3 ZC3H14 POP4 RBM42 TSEN34 INTS11 SF3A3 WTAP CDC40 MTO1 LEO1 LARP6 BMP4 RPS6 PSIP1 RCL1 EXOSC3 SNRPA1 VIRMA TRMT9B ESF1 RBM39 POP7 RNPS1 PAPOLG SRSF7 PUM2 RBM26 NCOR2 ZCCHC8 SART3 PES1 SNRPD3 TARBP1 CSTF2T EXOSC1 HNRNPU ELP6 DALRD3 RBM15B QTRT2 HSD17B10 THOC2 RBMX DKC1 TRMT112 CPSF7 DAZAP1 LSM7 RPS28 DDX39A AKAP8L UTP15 CLNS1A CWC15 PUS3 DCPS SF3B1 FASTKD2 NPM1 …
4.76966e-09	107	508	1.93115	Ribonucleoprotein complex	http://amigo.geneontology.org/amigo/term/GO:1990904	SNU13 SNRPF DYRK2 PRPF4B SNRPC ZC3H14 POP4 RUVBL2 RPS11 SF3A3 PABPC4 RPS8 CDC40 RPL4 LARP6 RPS6 MRPS2 SNRPA1 RPL30 ACTB POP7 CD2BP2 GTF3C1 LRPPRC ZCCHC8 SART3 PES1 DRG1 SNRPD3 MRPL43 HNRNPU NAA35 VIM CELF2 FXR1 RPL24 MRPL39 HSD17B10 RBMX DKC1 RPLP2 MRPL11 MRPL49 API5 DAZAP1 LSM7 ELAVL1 RPS28 MRPL4 CALR AKAP8L RPL27A MRPL48 RPS3 CWC15 SF3B1 SND1 CWC27 NPM1 SRP68 EFTUD2 RPL19 SRSF1 GCFC2 LSM8 RRP1B…
4.78301e-09	159	862	1.69117	Establishment of protein localization	http://amigo.geneontology.org/amigo/term/GO:0045184	MON2 CDKN1A SCAMP2 CPLX3 AP4S1 IPO4 AKAP5 VIPAS39 HSP90AA1 AP1G1 PDCD5 YIF1B RUVBL2 NR1H2 PARK7 RCC2 TCP1 RIMS1 SNX3 AP4E1 SCG5 BMP4 FRMPD1 YWHAZ PEX2 TERF1 COPA CCT3 LMNA FERMT1 SEC23B YWHAB SNX21 TFR2 STX1A PKD1 GCC2 CCT7 CCT4 PEX13 YWHAQ AFM USO1 HADH MTTP LAMP1 CLU RAN RPH3A ERP29 CORO1C YWHAH UFD1 RYR2 VPS26A HK1 SEC24C AP3M1 CEP55 CCDC186 BAG3 WDR11 MYRIP GRIP2 CHCHD4 RAB7A NLGN1 HCLS1 CDK1…
5.04197e-09	276	1728	1.46441	Macromolecule localization	http://amigo.geneontology.org/amigo/term/GO:0033036	PACSIN2 SUN2 ESYT1 MON2 NUP107 BICD1 PPHLN1 SRSF3 CDKN1A HSP90AB1 ABHD17C SIN3A SCAMP2 CPLX3 HEXA AP4S1 IPO4 MMP14 AKAP5 GPHN NPC2 VIPAS39 CEP128 HSP90AA1 GAS8 ATP2C2 AP1G1 PDCD5 YIF1B KDELR1 RUVBL2 NR1H2 PARK7 RCC2 RPA2 EPB41 CEP192 ANKRD13C LEPROT TCP1 EPB41L2 RIMS1 SNX3 TTK CCDC68 AP4E1 CAPN3 SCG5 TJP1 VPS4B BMP4 CNTLN ANXA1 FRMPD1 RAB14 ODF2 MTBP YWHAZ PEX2 TERF1 CRH COPA CCT3 GLMP LMNA ABCA4…
5.25279e-09	121	602	1.84283	Regulation of cell cycle	http://amigo.geneontology.org/amigo/term/GO:0051726	MDM1 CDKN1A HSP90AB1 PKHD1 SIN3A TGM1 LGMN PPP1R13B FBXO31 CEBPA ATF5 RCC2 RPA2 CABLES1 CDC20 SMOC2 CITED2 TTK INO80 IVD VPS4B BMP4 ANXA1 TRIM32 MTBP CSPP1 COPS5 SDCBP CRNN NSFL1C RBL1 UBE2C PKD1 SPAST GEN1 DACH1 CUL4A MN1 TTC28 PES1 DRG1 DNA2 BCCIP BRINP3 HNRNPU XPC TPRA1 MECOM CCNB3 CCNQ NAA10 LRP5 DDB1 MADD DOT1L CALR NANOS3 ANAPC15 CHORDC1 CEP295 USP28 CXCR5 ASNS TPR CENPF ANGEL2 DTL MCPH1 CU…
6.64653e-09	126	638	1.8107	Regulation of cellular component biogenesis	http://amigo.geneontology.org/amigo/term/GO:0044087	EP300 ACVRL1 MDM1 PPHLN1 AMIGO2 MAK HSP90AA1 ARHGAP35 NR1H2 PARK7 FBLIM1 RCC2 WASF2 ADGRL2 CCN2 TMOD2 TJP1 VPS4B LRFN5 TERF1 SDCBP TMOD4 RHOC ELAPOR1 CCN1 DNAI3 DLC1 FERMT1 ARPC1B STX1A IFT140 NPHP1 ANTXR1 EMILIN1 SLIT2 SLAIN2 SEMA4D CLU HIP1R ARPC3 CORO1C DRG1 SAMD8 DKK1 HNRNPU PIP4K2A ARPC4 RAB7A NLGN1 HRG PAK2 HCLS1 ARHGAP6 IL1RAPL1 PHF8 SRPX2 SLITRK2 SWAP70 ICAM1 DNMT1 FNIP1 ARAP1 RPS3 CEP295…
8.77193e-09	223	1336	1.53036	Enzyme binding	http://amigo.geneontology.org/amigo/term/GO:0019899	TUBA1A ACVRL1 BICD1 PPP6R2 RIPK1 TUBB PHF1 SRSF3 CDKN1A TFEB HSP90AB1 POLG CYP1A2 AKAP5 NPC2 NEK9 RIN3 VRK1 HSP90AA1 AP1G1 AMFR CEBPA GPI SAE1 RUVBL2 ATF5 NR1H2 PARK7 RCC2 RPA2 CEP192 RNF138 MAPRE2 DOCK7 CDC20 TCP1 ARMT1 CITED2 SNX3 HDAC2 RAD51 CCBE1 RPS6 CNTLN JAK2 YWHAZ COPS5 STRIP1 RPAP2 GTF2B POLB DDRGK1 YWHAB UBE2C VAPB ACTB STX1A TRAP1 SLC9A3R2 PKD1 ELOB IL1R1 FANCL LRPPRC SPDYA PPP1CB SPRY…
8.85151e-09	158	863	1.67858	Macromolecule catabolic process	http://amigo.geneontology.org/amigo/term/GO:0009057	USP15 RIPK1 GPLD1 SKIV2L DXO HSP90AB1 ABHD17C ZC3H14 LGMN HSP90AA1 FBXO9 FBXO31 AMFR DHX34 PARK7 UBE4B PABPC4 OMA1 CDC20 PNLDC1 SNX3 RNF165 CAPN3 VPS4B CLPX PSMC6 EXOSC3 TRIM32 EIF3E RIDA SDCBP PGLYRP4 DDRGK1 UBE2C PKD1 RNPS1 LRPPRC PUM2 UBA6 USP12 DIS3 CUL4A CLU UFD1 DNA2 IDE ATE1 SAMD4B HNRNPU VIM RAB7A WWTR1 OGT GPRASP1 AIFM1 GPC3 DKC1 RELA DDB1 RAPSN PRR5L LSM7 SGTA KHSRP ELAVL1 USP28 CBL DCP…
2.39644e-08	64	253	2.31929	RNA splicing	http://amigo.geneontology.org/amigo/term/GO:0008380	DDX17 SNRPF PRPF4B SNRPC SRSF3 RBM42 TSEN34 SF3A3 WTAP CDC40 PSIP1 SNRPA1 RBM39 RNPS1 SRSF7 SART3 SNRPD3 HNRNPU RBM15B RBMX DAZAP1 LSM7 DDX39A CLNS1A CWC15 DCPS SF3B1 NPM1 EFTUD2 SRSF1 GCFC2 LSM8 PRDX6 HNRNPK SNW1 HTATSF1 KHDRBS1 TARDBP SRRM2 TIA1 SNRPE SNRNP70 FASTK SNRPG PRPF18 NCBP2 RBM8A THRAP3 TRA2B USP39 CLP1 DDX5 SNRPD2 U2AF2 NOVA2 C1QBP PHF5A SFPQ JMJD6 SRSF10 RBM4B CRNKL1 LSM2 MFAP1
2.75205e-08	156	862	1.65926	Microtubule cytoskeleton	http://amigo.geneontology.org/amigo/term/GO:0015630	TUBA1A BICD1 CCDC77 MAK TUBB PHF1 PKHD1 BBOF1 DLST NEK9 CEP128 GAS8 CFAP20 LSM14A ARHGAP35 RUVBL2 ATF5 RCC2 KIF17 NUDC EPB41 MAP7D1 CEP192 MTCL1 SS18 MAPRE2 TCP1 CCDC68 LEO1 NDN VPS4B DLGAP5 CNTLN ODF2 SPATC1 LRRCC1 CSPP1 CCT3 RUSC1 DCLRE1B DNAI3 POLB RBM39 ARFGEF2 IFT140 TEDC2 CCT7 CCT4 LRPPRC SPAST AGBL5 GEN1 SLAIN2 FHDC1 HSPH1 SPRY2 NEK1 RAN CCDC92 DNAH10 MPHOSPH9 DYNLL1 ACADS SNAP29 LYST CEP5…
2.75205e-08	39	118	3.03025	Spliceosome	http://www.genome.jp/kegg-bin/show_pathway?ssc03040	SNU13 HNRNPA1 SNRPF SNRPC SRSF3 ACIN1 SF3A3 CDC40 SNRPA1 SRSF7 SNRPD3 THOC2 RBMX LSM7 CWC15 SF3B1 EFTUD2 SRSF1 LSM8 HNRNPK SNW1 SNRNP70 SNRPG LSM5 PRPF18 NCBP2 RBM8A TRA2B USP39 SMNDC1 DDX5 ALYREF SNRPD2 U2AF2 PHF5A SRSF10 CRNKL1 HNRNPC LSM2
2.85516e-08	138	736	1.71909	Regulation of organelle organization	http://amigo.geneontology.org/amigo/term/GO:0033043	EP300 MDM1 BICD1 PPHLN1 MAK CPLX3 CFL2 PDCD5 ARHGAP35 GRHL3 WASF2 OMA1 CDC20 MAP3K4 TCP1 CCN2 TTK TMOD2 TJP1 VPS4B BMP4 ANXA1 MTBP TERF1 SDCBP PFDN2 CCT3 LMNA TMOD4 RHOC ELAPOR1 DNAI3 DLC1 ARPC1B ERCC4 IFT140 PKD1 CCT7 CCT4 GEN1 SLIT2 SLAIN2 HIP1R ARPC3 DRG1 ACTN2 ARMH3 HNRNPU PIP4K2A ARPC4 MCM2 HRG PAK2 HCLS1 ARHGAP6 SLC25A5 NAA10 DKC1 LRP5 SWAP70 MAP2K7 DNMT1 CALR TMED9 VDAC1 ANAPC15 ARAP1 RPS3…
3.7749e-08	238	1472	1.4824	Regulation of cellular protein metabolic process	http://amigo.geneontology.org/amigo/term/GO:0032268	XRCC6 EP300 ACVRL1 PTPRO PPP6R2 RIPK1 JARID2 GPLD1 PHF1 CDKN1A HSP90AB1 SIN3A ARRDC4 CCDC88C LGMN HSP90AA1 PDCD5 LSM14A EIF3K SAE1 RUVBL2 NR1H2 PARK7 DOCK7 CDC20 MAP3K4 PNLDC1 NCOA7 HDAC2 CD109 CAPN3 RAD51 NDN CCBE1 LARP6 FANCM BMP4 EXOSC3 TRIM32 MTBP EIF3E RIDA SDCBP DDR2 LMNA CCN1 DLC1 DDRGK1 YWHAB CASS4 TRAP1 PKD1 ANTXR1 LRPPRC SPDYA EMILIN1 SLIT2 SPRY2 SEMA4D CLU HIP1R DIABLO ERP29 SPPL3 CORO…
4.20346e-08	75	323	2.1289	Actin cytoskeleton	http://amigo.geneontology.org/amigo/term/GO:0015629	MYO1A CFL2 SIPA1L1 ARHGAP35 FBLIM1 CAP1 FILIP1 TPM1 MYO1E PGM5 ANXA1 DDR2 SPTA1 CGN TMOD4 CNN3 DLC1 TNNC2 NCOA5 ACTB ARPC1B CTNNA2 SEPTIN11 PDLIM5 SPRY2 ARPC3 CORO1C MYO18B ACTA2 SH3PXD2A ABLIM1 NEBL MYRIP ARPC4 MYLK ARHGAP6 CFL1 SWAP70 MYO1F TPM4 VPS11 PKNOX2 ARPC5 ACTR3 CALD1 LMOD2 CTTNBP2 DBNL MYO10 BAIAP2 SEPTIN9 USH1G CDC42EP4 ACACA DCTN4 CARMIL2 FLOT1 LANCL2 MPP4 CAPZA2 PALLD AIF1 ALDOA TNN…
4.52098e-08	90	418	1.97407	Protein domain specific binding	http://amigo.geneontology.org/amigo/term/GO:0019904	RIPK1 HSP90AB1 RUNX2 ARHGAP5 NRL AKAP5 ANGEL1 CCDC88C HSP90AA1 E2F4 RCC2 WASF2 CITED2 EPB41L2 TJP1 CNTLN JAK2 OSTF1 TRPS1 YWHAZ SDC2 TERF1 DLC1 RBM39 YWHAB VAPB PKD1 SRSF7 CRIM1 YWHAQ LNX2 LAMP1 HIP1R YWHAH ACTN2 HIF1AN VIM PRKAR2A TADA3 NLGN1 HCLS1 MED12 RBMX RELA DDB1 SQSTM1 RUFY1 FZD4 CBL ICA1 CACYBP ACSL3 CUL3 EXOC4 DBNL SRP68 ACOX1 GRB2 SLC9A3R1 AATF CEP250 CLTC HNRNPK LIN7C KHDRBS1 SRRM2 CH…
4.52386e-08	293	1900	1.41387	Regulation of signal transduction	http://amigo.geneontology.org/amigo/term/GO:0009966	EP300 ACVRL1 TESPA1 USP15 PTPRO YBX3 DYRK2 RIPK1 TRIM15 DAAM2 HSP90AB1 RUNX2 PKHD1 MBIP AKAP5 SIPA1L1 CCDC88C LGMN GSC FBXO9 CDH13 AMFR LSM14A ARHGAP35 RUVBL2 PARK7 PIK3CD DRAXIN RPA2 CEP192 GAREM1 MAPRE2 CTH ANKRD13C LEPROT TXNDC12 SMOC2 MAP3K4 CITED2 CCN2 SNX3 HDAC2 CD109 RNF165 TMOD2 CAPN3 CCBE1 UACA BMP4 JAK2 FRMPD1 TRIM32 EGFL7 RSPO2 YWHAZ SULF1 COPS5 CRH SDCBP ATF6 LMNA CRNN MAGI3 CCN1 DLC1…
4.77514e-08	127	666	1.74834	Positive regulation of cellular component organization	http://amigo.geneontology.org/amigo/term/GO:0051130	EP300 BICD1 PPHLN1 AMIGO2 CFL2 HSP90AA1 PDCD5 ARHGAP35 NR1H2 PARK7 PDPN WASF2 MAPRE2 ADGRL2 CDC20 MAP3K4 TCP1 CCN2 VPS4B ANXA1 TERF1 TOX SDCBP DDR2 PFDN2 CRABP2 CCT3 RHOC ELAPOR1 DNAI3 FERMT1 ARPC1B TFR2 NPHP1 CCT7 CCT4 EMILIN1 SLAIN2 SEMA4D CLU HIP1R ARPC3 CORO1C DRG1 ACTN2 PIP4K2A ARPC4 NLGN1 HRG SRPX2 SLC25A5 GPC3 SLITRK2 DKC1 LRP5 SWAP70 C3 MAP2K7 DNMT1 TMED9 FNIP1 VDAC1 ARAP1 RPS3 FZD4 CEP29…
5.05329e-08	49	173	2.59685	MRNA Splicing-Major Pathway	https://reactome.org/download/current	SNU13 HNRNPA1 SNRPF SNRPC SRSF3 SF3A3 CDC40 SNRPA1 CD2BP2 RNPS1 SRSF7 SNRPD3 CSTF2T HNRNPU RBMX CPSF7 LSM7 ELAVL1 CWC15 SF3B1 CWC27 EFTUD2 SRSF1 LSM8 HNRNPK SNW1 SRRM2 SNRPE SNRNP70 SNRPG LSM5 NCBP2 YBX1 RBM8A HNRNPUL1 TRA2B USP39 SMNDC1 CLP1 DDX5 ALYREF GTF2F2 U2AF2 PHF5A SRSF10 HNRNPA2B1 CRNKL1 HNRNPC LSM2
6.22615e-08	94	447	1.92804	Actin cytoskeleton organization	http://amigo.geneontology.org/amigo/term/GO:0030036	PARVB PACSIN2 DAAM2 CFL2 SIPA1L1 ARHGAP35 GRHL3 WASF2 EPB41 CAP1 EPB41L3 CCN2 EPB41L2 TPM1 TMOD2 CAPN3 TJP1 ANXA1 TRIM32 SDCBP CASQ1 SPTA1 TMOD4 RHOC STRIP1 CNN3 DNAI3 DLC1 CASS4 ACTB ARPC1B CTNNA2 ANTXR1 SLIT2 FHDC1 RAN HIP1R RHOF ARPC3 CORO1C ACTN2 NEBL FLNB ARPC4 HRG PAK2 HCLS1 ARHGAP6 TMSB4 TMSB15B PLS3 CFL1 SWAP70 CALR CAVIN3 ARAP1 NPHS2 ARPC5 ACTR3 FMNL2 CUL3 MKLN1 LMOD2 BAIAP2 GRB2 SLC9A3R…
6.89751e-08	211	1279	1.51255	Organic substance catabolic process	http://amigo.geneontology.org/amigo/term/GO:1901575	EP300 USP15 ABCD2 RIPK1 GPLD1 SKIV2L DXO HSP90AB1 ABHD17C CYP1A2 HEXA ZC3H14 LGMN HSP90AA1 FBXO9 FBXO31 AMFR GPI DHX34 IL4I1 ETFB ACOT7 PARK7 UBE4B PABPC4 ACADM OMA1 CDC20 PNLDC1 NT5E SNX3 RNF165 CAPN3 PLA2G4D VPS4B CLPX PSMC6 EXOSC3 TRIM32 EIF3E DPYS RIDA PEX2 SDCBP PGLYRP4 DPYD DDRGK1 UBE2C HMOX2 HAGH PKD1 RNPS1 PEX13 LRPPRC PUM2 TDO2 ETFDH UBA6 HADH USP12 DIS3 CUL4A CLU ACADS YWHAH UFD1 DNA2 H…
9.2354e-08	100	490	1.87111	Actin filament-based process	http://amigo.geneontology.org/amigo/term/GO:0030029	PARVB PACSIN2 SUN2 DAAM2 CFL2 SIPA1L1 CCDC88C ARHGAP35 GRHL3 WASF2 EPB41 CAP1 EPB41L3 CCN2 EPB41L2 TPM1 TMOD2 CAPN3 TJP1 ANXA1 TRIM32 SDCBP CASQ1 SPTA1 TMOD4 RHOC STRIP1 CNN3 DNAI3 DLC1 MYLK2 CASS4 ACTB ARPC1B CTNNA2 ANTXR1 SLIT2 FHDC1 RAN HIP1R RHOF ARPC3 CORO1C RYR2 ACTN2 NEBL FLNB ARPC4 HRG PAK2 HCLS1 ARHGAP6 TMSB4 TMSB15B PLS3 CFL1 SWAP70 CALR CAVIN3 ARAP1 AKAP9 NPHS2 ARPC5 ACTR3 FMNL2 CUL3 M…
1.08571e-07	182	1070	1.5595	Protein-containing complex subunit organization	http://amigo.geneontology.org/amigo/term/GO:0043933	EP300 TESPA1 NUP107 COPS7A SNRPF RIPK1 H1-3 SNRPC HSP90AB1 CFL2 IPO4 HSP90AA1 CENPT NR1H2 PARK7 FBLIM1 SF3A3 CEP192 CTH RIMS1 SNX14 MDN1 TMOD2 CAPN3 RAD51 VPS4B PSIP1 KCNV2 TERF1 CASQ1 CCT3 TMOD4 RHOC KCNA3 LRRC8C GTF2B DNAI3 GSDMD FERMT1 UBE2C ARPC1B STX1A PKD1 SPAST SLIT2 SLAIN2 TDO2 MTTP KCTD12 CLU HIP1R DENR ARPC3 SART3 DRG1 SNRPD3 SMARCB1 SNAP29 HIRA ACTN2 SAMD8 DKK1 CUTC PKD2L1 NDUFB6 KIF5B…
1.13151e-07	174	1012	1.5764	Mitochondrion	http://amigo.geneontology.org/amigo/term/GO:0005739	MCAT RIPK1 JARID2 SLC25A27 POLG ARG2 DLST GSTZ1 GLRX5 HSP90AA1 COX6B ETFB PUSL1 PARK7 PDPN ACADM OMA1 MTHFD1L FBXL4 ATP5F1A RAD51 IVD CLPX DLGAP5 HSDL2 MRPS2 ARMC1 PFDN2 CASQ1 ACSS1 PANK2 PFDN4 TUFM UQCRC2 TRAP1 COX5B PTCD3 LRPPRC LOC100516606 ETFDH HADH CLU DIABLO COQ5 ACADS TXNRD2 DNA2 HK1 P4HA1 SAMD8 IDE BLOC1S2 MRPL43 PRDX3 NDUFB6 OXSM HIGD1A UQCRC1 XPC MRPL39 UBA1 HSD17B10 TIMM8A SLC25A5 PGR…
1.14694e-07	112	573	1.79209	Metabolism of RNA	https://reactome.org/download/current	SNU13 APOBEC3B HNRNPA1 SARNP NUP107 SNRPF SKIV2L RPS18 SNRPC SRSF3 RPS11 SF3A3 RPS8 WTAP HBS1L CDC40 ANP32A RPS6 RCL1 EXOSC3 SNRPA1 YWHAZ RPL30 YWHAB CD2BP2 RNPS1 CNOT11 SRSF7 RPS3A DIS3 PES1 SNRPD3 CSTF2T EXOSC1 HNRNPU GSPT2 THOC2 RBMX RPLP2 CPSF7 GTF2H1 WDR18 LSM7 KHSRP ELAVL1 RPS28 UTP15 ETF1 CLNS1A CWC15 DCPS TPR SF3B1 CWC27 EFTUD2 RPL19 SRSF1 LSM8 RPS21 CHTOP DCP1A HNRNPK SNW1 RPS27L SRRM2 S…
1.14758e-07	96	466	1.88878	Structural molecule activity	http://amigo.geneontology.org/amigo/term/GO:0005198	TUBA1A KRT84 NUP107 TUBB COL11A2 RPS18 RPS19 RPS11 RPL22 EPB41 CEP192 EPB41L3 RPS8 EPB41L2 CAPN3 RPL4 RPLP1 RPS6 MRPS2 RPL30 COPA COL11A1 ACTB ARPC1B CTNNA2 EMILIN1 RPS3A RPL21 ARPC3 CRYBB3 CRYBB2 MRPL43 INA CTBP2 VIM BSN ARPC4 RPL24 RPLP2 MRPL11 MRPL49 RPS28 MRPL4 RPL18A FBN2 RPL27A RPS3 PRELP LAMB1 LAMC1 ARPC5 TPR ACTR3 COL4A4 GFAP KRT39 RPL19 RPS21 CLTC RPS27L HSPB6 RPL11 RPL13 RPL27 ATM RPL18…
1.28511e-07	49	178	2.5239	MRNA Splicing	https://reactome.org/download/current	SNU13 HNRNPA1 SNRPF SNRPC SRSF3 SF3A3 CDC40 SNRPA1 CD2BP2 RNPS1 SRSF7 SNRPD3 CSTF2T HNRNPU RBMX CPSF7 LSM7 ELAVL1 CWC15 SF3B1 CWC27 EFTUD2 SRSF1 LSM8 HNRNPK SNW1 SRRM2 SNRPE SNRNP70 SNRPG LSM5 NCBP2 YBX1 RBM8A HNRNPUL1 TRA2B USP39 SMNDC1 CLP1 DDX5 ALYREF GTF2F2 U2AF2 PHF5A SRSF10 HNRNPA2B1 CRNKL1 HNRNPC LSM2
1.4321e-07	240	1512	1.45531	Catabolic process	http://amigo.geneontology.org/amigo/term/GO:0009056	EP300 USP15 ABCD2 RIPK1 GPLD1 SKIV2L DXO TFEB HSP90AB1 ABHD17C CYP1A2 HEXA ZC3H14 LGMN ATG2B HSP90AA1 FBXO9 FBXO31 AMFR GPI DHX34 IL4I1 ETFB ACOT7 PARK7 UBE4B PABPC4 MTCL1 ACADM OMA1 CDC20 PNLDC1 NT5E SNX14 SNX3 RNF165 CAPN3 PLA2G4D VPS4B CLPX PSMC6 EXOSC3 TRIM32 EIF3E DPYS RIDA PEX2 SDCBP ATF6 UFC1 PGLYRP4 ELAPOR1 DPYD DDRGK1 UBE2C ERCC4 HMOX2 HAGH PKD1 RNPS1 PEX13 LRPPRC PUM2 TDO2 ETFDH UBA6 HA…
1.53246e-07	49	179	2.5098	RNA catabolic process	http://amigo.geneontology.org/amigo/term/GO:0006401	SKIV2L DXO ZC3H14 DHX34 PABPC4 PNLDC1 EXOSC3 EIF3E RIDA RNPS1 LRPPRC PUM2 DIS3 DNA2 SAMD4B HNRNPU VIM DKC1 PRR5L LSM7 KHSRP ELAVL1 DCPS ANGEL2 FASTKD2 ZC3HAV1 SND1 NPM1 AXIN2 MEIOC TIRAP DCP1A TARDBP IGF2BP1 FASTK UPF3A CARHSP1 NCBP2 YTHDF2 SECISBP2 YBX1 RBM8A FEN1 THRAP3 DDX5 SMG1 LSM2 YTHDF1 ERN2
2.21105e-07	70	305	2.10424	Posttranscriptional regulation of gene expression	http://amigo.geneontology.org/amigo/term/GO:0010608	RIPK1 ZC3H14 LSM14A EIF3K PABPC4 PNLDC1 LARP6 BMP4 EXOSC3 EIF3E RIDA TRAP1 LRPPRC PUM2 NCOR2 NOLC1 SAMD4B HNRNPU VIM EIF2A FXR1 DKC1 EIF4G2 ELAVL1 CDC37 CALR NANOS3 ETF1 TCOF1 RPS3 DCPS NIBAN1 TPR ANGEL2 FASTKD2 NPM1 AXIN2 MEIOC STAT3 TIRAP DCP1A EIF6 KHDRBS1 TARDBP IGF2BP1 RPS27L TIA1 FASTK UPF3A IL20RB CARHSP1 NCBP2 YTHDF2 SECISBP2 YBX1 RPL26 MTG1 RACK1 THRAP3 TRNAU1AP CLP1 DPH7 DDX5 EIF2S1 DPH…
2.74284e-07	179	1062	1.54534	Nitrogen compound transport	http://amigo.geneontology.org/amigo/term/GO:0071705	MON2 NUP107 RIPK1 SLC44A4 SRSF3 CDKN1A SCAMP2 CPLX3 AP4S1 IPO4 SLC12A6 AKAP5 VIPAS39 HSP90AA1 SLC28A1 AP1G1 PDCD5 YIF1B NR1H2 PARK7 TCP1 RIMS1 SNX3 SLC14A1 AP4E1 SCG5 BMP4 YWHAZ PEX2 CRH COPA LMNA LRRC8C FERMT1 SEC23B YWHAB SNX21 ACTB TFR2 STX1A PKD1 GCC2 PEX13 YWHAQ AFM USO1 HADH MTTP ABCG2 ARHGEF7 CLU RAN RPH3A ERP29 YWHAH UFD1 VPS26A PSAP SEC24C AP3M1 CCDC186 BAG3 WDR11 MYRIP SLC38A3 RBM15B GR…
3.42161e-07	222	1389	1.46537	Identical protein binding	http://amigo.geneontology.org/amigo/term/GO:0042802	FAM118A PACSIN2 SUN2 USP15 PTPRO ABCD2 RIPK1 PHF1 SNRPC HSP90AB1 PSTPIP1 MBIP TGM1 CCNB1IP1 GPHN CCDC88C HSP90AA1 CDH13 NQO1 AMFR CEBPA RUVBL2 ACOT7 PARK7 MAPRE2 ACADM CTH CTPS1 IGF2R ZBTB2 MTHFD1L CCNC EIF3J RAD51 VPS4B PSMC6 DMRTA1 JAK2 CARNMT1 TRIM32 FNBP1 YWHAZ SDC2 TERF1 TRIM55 SDCBP ATF6 CD84 CASQ1 PSMD4 DCLRE1B DPYD YWHAB VAPB ACTB PSPH STX1A ERCC4 SLC9A3R2 ARID5A GCC2 CCT7 DPY30 EMILIN1 G…
3.52433e-07	26	66	3.61182	Regulation of mRNA splicing, via spliceosome	http://amigo.geneontology.org/amigo/term/GO:0048024	DDX17 SRSF3 RBM42 WTAP RBM39 RNPS1 SRSF7 HNRNPU RBM15B RBMX DAZAP1 NPM1 PRDX6 HNRNPK SNW1 KHDRBS1 TIA1 SNRNP70 RBM8A THRAP3 TRA2B DDX5 U2AF2 C1QBP JMJD6 SRSF10
3.77086e-07	32	94	3.12118	Regulation of mRNA processing	http://amigo.geneontology.org/amigo/term/GO:0050684	DDX17 SRSF3 ZC3H14 RBM42 WTAP LEO1 VIRMA RBM39 RNPS1 SRSF7 HNRNPU RBM15B RBMX CPSF7 DAZAP1 NPM1 PRDX6 HNRNPK SNW1 KHDRBS1 TIA1 SNRNP70 NCBP2 RBM8A THRAP3 TRA2B DDX5 U2AF2 C1QBP IWS1 JMJD6 SRSF10
4.11648e-07	162	943	1.57507	Protein-containing complex assembly	http://amigo.geneontology.org/amigo/term/GO:0065003	EP300 TESPA1 NUP107 COPS7A SNRPF RIPK1 H1-3 SNRPC HSP90AB1 IPO4 HSP90AA1 CENPT NR1H2 PARK7 FBLIM1 SF3A3 CEP192 CTH RIMS1 MDN1 TMOD2 CAPN3 RAD51 PSIP1 KCNV2 TERF1 CASQ1 CCT3 TMOD4 RHOC KCNA3 LRRC8C GTF2B DNAI3 GSDMD FERMT1 UBE2C ARPC1B STX1A PKD1 SPAST SLIT2 SLAIN2 TDO2 MTTP KCTD12 CLU HIP1R DENR ARPC3 SART3 DRG1 SNRPD3 HIRA SAMD8 DKK1 CUTC PKD2L1 NDUFB6 ARMC4 ARPC4 CAND2 MCM2 HRG HCLS1 RPL24 CHAF…
4.15354e-07	182	1091	1.52948	Cellular protein localization	http://amigo.geneontology.org/amigo/term/GO:0034613	PACSIN2 SUN2 BICD1 PPHLN1 CDKN1A HSP90AB1 ABHD17C SIN3A IPO4 MMP14 AKAP5 GPHN VIPAS39 HSP90AA1 GAS8 ATP2C2 AP1G1 PDCD5 KDELR1 RUVBL2 PARK7 RCC2 RPA2 EPB41 CEP192 ANKRD13C LEPROT TCP1 EPB41L2 RIMS1 TTK AP4E1 CAPN3 SCG5 BMP4 CNTLN FRMPD1 MTBP YWHAZ PEX2 TERF1 COPA CCT3 GLMP LMNA FERMT1 SEC23B DDRGK1 NSFL1C YWHAB ACTB STX1A IFT140 PKD1 GCC2 CCT7 CCT4 PEX13 YWHAQ USO1 LAMP1 RAN RPH3A ANKRD13A YWHAH P…
4.44035e-07	133	735	1.65906	Cell cycle process	http://amigo.geneontology.org/amigo/term/GO:0022402	MDM1 TUBB CDKN1A PKHD1 SIN3A CCNB1IP1 FBXO31 E2F4 LSM14A ATF5 RCC2 NUDC RPA2 CEP192 CDC20 TTK CAPN3 INO80 RAD51 IVD VPS4B FANCM BMP4 RPS6 CNTLN ANXA1 ODF2 MTBP TERF1 CSPP1 NES LMNA CRNN PHGDH RHOC NSFL1C UBE2C RTF2 PKD1 SPAST SPDYA GEN1 DACH1 SPRY2 CUL4A RAN MN1 DRG1 DNA2 CEP55 BCCIP HNRNPU CCDC36 XPC TPRA1 STAG1 NAA50 RPL24 CCNB3 PHF8 NAA10 LRP5 DDB1 CALR AKAP8 AKAP8L RGS14 ANAPC15 RPS3 CHORDC1 …
4.86797e-07	131	722	1.66353	Cellular macromolecule catabolic process	http://amigo.geneontology.org/amigo/term/GO:0044265	USP15 RIPK1 SKIV2L DXO HSP90AB1 ZC3H14 LGMN HSP90AA1 FBXO9 FBXO31 AMFR DHX34 PARK7 UBE4B PABPC4 OMA1 CDC20 PNLDC1 VPS4B CLPX PSMC6 EXOSC3 TRIM32 EIF3E RIDA SDCBP DDRGK1 UBE2C PKD1 RNPS1 LRPPRC PUM2 UBA6 USP12 DIS3 CUL4A CLU UFD1 DNA2 IDE ATE1 SAMD4B HNRNPU VIM RAB7A WWTR1 OGT AIFM1 DKC1 DDB1 PRR5L LSM7 SGTA KHSRP ELAVL1 USP28 CBL DCPS PSMC2 KLHL20 EDEM3 ANGEL2 DTL DNAJC10 FASTKD2 CUL3 ZC3HAV1 SND…
4.87141e-07	35	110	2.91724	PW:0001073 spliceosome pathway	ftp://ftp.rgd.mcw.edu/pub/data_release	HNRNPA1 SNRPC SRSF3 ACIN1 SF3A3 CDC40 SNRPA1 RNPS1 SRSF7 SART3 PPIL2 HNRNPU THOC2 RBMX LSM7 CWC15 SF3B1 EFTUD2 LSM8 SNW1 SRRM2 SNRNP70 SNRPG NCBP2 RBM8A TRA2B USP39 SMNDC1 DDX5 SNRPD2 U2AF2 PHF5A SRSF10 HNRNPA2B1 CRNKL1
5.1201e-07	110	576	1.75092	Nuclear body	http://amigo.geneontology.org/amigo/term/GO:0016604	PACSIN2 DDX17 CKAP4 PARP11 PRPF4B TDP2 SNRPC SRSF3 CDKN1A ZC3H14 SLC28A1 CENPT PARK7 RPA2 EPB41 SF3A3 FBXL4 GTF3C6 CDC40 SETBP1 ICE2 SLTM TCF12 TRIM69 INO80 RAD51 SNAPC3 SNRPA1 EIF3E VIRMA TERF1 LMNA DCLRE1B GTF2B RBM39 AP5Z1 CD2BP2 RNPS1 ZC3H8 PAPOLG FANCL MAML3 NAA15 PSPC1 ZNF395 NCOR2 ZCCHC8 SART3 DRG1 SYNPO2L NOLC1 EXO1 HNRNPU SATB1 RBM15B PHF7 STAG1 WWTR1 MECOM NFKBIZ CCNB3 CENPI DKC1 DGKZ A…
5.21093e-07	53	209	2.32502	Coronavirus disease	http://www.genome.jp/kegg-bin/show_pathway?ssc05171	C2 RPS18 RPS19 RPS11 RPL22 PIK3CD RPS8 RPL4 RPLP1 RPS6 RPL30 RPS3A RPL21 RPL24 RPLP2 RELA C3 RPS28 RPL18A RPL27A RPS3 MMP1 IL6ST STAT3 RPL19 RPS21 RPS27L RPL11 RPL13 RPL27 RPL18 RPS17 RPL29 RPL26 RPS9 RPS7 NUDT3 RPL7 RPS15 RPS2 RPL35 RPL17 RPL23A RPS15A RPL32 RPL7A RPL10 RPS25 RPL15 RPL23 RPL28 RPS24 RPL3
5.8597e-07	182	1097	1.52111	Cellular macromolecule localization	http://amigo.geneontology.org/amigo/term/GO:0070727	PACSIN2 SUN2 BICD1 PPHLN1 CDKN1A HSP90AB1 ABHD17C SIN3A IPO4 MMP14 AKAP5 GPHN VIPAS39 HSP90AA1 GAS8 ATP2C2 AP1G1 PDCD5 KDELR1 RUVBL2 PARK7 RCC2 RPA2 EPB41 CEP192 ANKRD13C LEPROT TCP1 EPB41L2 RIMS1 TTK AP4E1 CAPN3 SCG5 BMP4 CNTLN FRMPD1 MTBP YWHAZ PEX2 TERF1 COPA CCT3 GLMP LMNA FERMT1 SEC23B DDRGK1 NSFL1C YWHAB ACTB STX1A IFT140 PKD1 GCC2 CCT7 CCT4 PEX13 YWHAQ USO1 LAMP1 RAN RPH3A ANKRD13A YWHAH P…
8.44181e-07	225	1429	1.4436	Metabolic pathways	http://www.genome.jp/kegg-bin/show_pathway?ssc01100	MCAT ATP5F1B GPLD1 MOCS1 ACSBG1 CYP1A2 HEXA GPHN ARG2 DLST GSTZ1 ITPK1 NQO1 GPT2 GPI COX6B DHDH IL4I1 PIK3CD PGD AGMAT ACADM CTH TXNDC12 CTPS1 MTHFD1L ECHDC1 NT5E AMD1 ATP5F1A PLA2G4D IVD CNDP2 MTAP CARNMT1 NANS UCK1 DPYS CA2 FDPS SELENBP1 CERS2 PHGDH DPYD KYAT3 EEF1D PLCB4 SPTLC3 ACSS1 PANK2 PSPH UQCRC2 XYLT1 HMOX2 HAGH ATP6V0C COX5B SPR GFPT1 CAMKMT LOC100516606 ATP6V1C2 ACP1 CD38 TDO2 PAICS HA…
8.44181e-07	208	1299	1.46808	Cellular catabolic process	http://amigo.geneontology.org/amigo/term/GO:0044248	USP15 ABCD2 RIPK1 GPLD1 SKIV2L DXO TFEB HSP90AB1 HEXA ZC3H14 LGMN ATG2B HSP90AA1 FBXO9 FBXO31 AMFR DHX34 IL4I1 ETFB ACOT7 PARK7 UBE4B PABPC4 MTCL1 ACADM OMA1 CDC20 PNLDC1 NT5E SNX14 PLA2G4D VPS4B CLPX PSMC6 EXOSC3 TRIM32 EIF3E DPYS RIDA PEX2 SDCBP ATF6 UFC1 ELAPOR1 DPYD DDRGK1 UBE2C ERCC4 HMOX2 HAGH PKD1 RNPS1 PEX13 LRPPRC PUM2 TDO2 ETFDH UBA6 HADH USP12 DIS3 CUL4A CLU ACADS SNAP29 UFD1 DNA2 IDE …
8.45557e-07	43	155	2.54351	MRNA binding	http://amigo.geneontology.org/amigo/term/GO:0003729	YBX3 SNRPC PARK7 PABPC4 SERBP1 LARP6 RIDA RNPS1 PUM2 AUH HNRNPU FXR1 IGF2BP2 RBMX KHSRP ELAVL1 CALR ETF1 RPS3 TPR ANGEL2 SF3B1 SRSF1 TARDBP IGF2BP1 TIA1 RSL1D1 CARHSP1 LOC110257686 NCBP2 SECISBP2 YBX1 RBM8A RPL26 TRA2B DDX5 RPL7 PURB MECP2 G3BP1 IGF2BP3 HNRNPC TYMS
1.0759e-06	103	536	1.76185	Mitotic cell cycle	http://amigo.geneontology.org/amigo/term/GO:0000278	CDKN1A PKHD1 SIN3A LGMN FBXO31 CENPT E2F4 LSM14A RCC2 NUDC RPA2 CEP192 CDC20 SMOC2 TTK INO80 RAD51 VPS4B BMP4 RPS6 ANXA1 MTBP SDCBP NES RHOC NSFL1C UBE2C RTF2 PKD1 SPAST SPDYA GEN1 SPRY2 CUL4A RAN TTC28 DRG1 DNA2 CEP55 BCCIP BRINP3 HNRNPU TADA3 XPC TPRA1 STAG1 NAA50 RPL24 CCNB3 PHF8 NAA10 LRP5 DDB1 AKAP8 AKAP8L RGS14 ANAPC15 ASNS TPR CENPF ANGEL2 DTL MCPH1 TACC1 ACVR1 CUL3 CHMP6 SLC9A3R1 MEIOC AA…
1.19414e-06	57	238	2.19581	Processing of Capped Intron-Containing Pre-mRNA	https://reactome.org/download/current	SNU13 HNRNPA1 SARNP NUP107 SNRPF SNRPC SRSF3 SF3A3 WTAP CDC40 SNRPA1 CD2BP2 RNPS1 SRSF7 SNRPD3 CSTF2T HNRNPU THOC2 RBMX CPSF7 LSM7 ELAVL1 CWC15 TPR SF3B1 CWC27 EFTUD2 SRSF1 LSM8 CHTOP HNRNPK SNW1 SRRM2 SNRPE SNRNP70 SNRPG LSM5 NCBP2 ZC3H11A YBX1 RBM8A NUP35 HNRNPUL1 TRA2B USP39 SMNDC1 CLP1 DDX5 ALYREF GTF2F2 U2AF2 PHF5A SRSF10 HNRNPA2B1 CRNKL1 HNRNPC LSM2
1.46629e-06	259	1704	1.39356	Regulation of localization	http://amigo.geneontology.org/amigo/term/GO:0032879	PACSIN2 SUN2 ACVRL1 BICD1 CRACR2A RIPK1 GPLD1 TRIM15 C2 HSP90AB1 ABHD17C MFGE8 SIN3A CPLX3 MMP14 AKAP5 RIN3 LGMN GAS8 ATP2C2 CDH13 AP1G1 CFAP20 PDCD5 GPI NR1H2 PARK7 PIK3CD PDPN RCC2 EPB41 MAPRE2 LEPROT DOCK7 SMOC2 TCP1 CITED2 EPB41L2 SNX3 ATP5F1A TPM1 SEMA6D CAPN3 SCG5 VPS4B CCBE1 BMP4 ANXA1 TRIM32 RAB14 CA2 TERF1 SULF1 CRH SDCBP DDR2 CD84 CASQ1 CCT3 LMNA LOC100154179 RHOC KCNA3 CCN1 DNAI3 DLC1 …
1.51255e-06	41	147	2.55719	MRNA catabolic process	http://amigo.geneontology.org/amigo/term/GO:0006402	DXO ZC3H14 DHX34 PABPC4 PNLDC1 EXOSC3 EIF3E RIDA RNPS1 PUM2 SAMD4B HNRNPU VIM PRR5L LSM7 KHSRP ELAVL1 DCPS ANGEL2 FASTKD2 ZC3HAV1 NPM1 AXIN2 MEIOC TIRAP DCP1A TARDBP IGF2BP1 FASTK UPF3A CARHSP1 NCBP2 YTHDF2 SECISBP2 YBX1 RBM8A THRAP3 DDX5 SMG1 LSM2 YTHDF1
1.51255e-06	85	418	1.8644	Regulation of cell cycle process	http://amigo.geneontology.org/amigo/term/GO:0010564	MDM1 CDKN1A PKHD1 SIN3A FBXO31 ATF5 RCC2 RPA2 CDC20 TTK INO80 IVD VPS4B BMP4 ANXA1 MTBP CSPP1 CRNN NSFL1C UBE2C PKD1 SPAST GEN1 DACH1 CUL4A MN1 DRG1 DNA2 HNRNPU XPC TPRA1 CCNB3 NAA10 LRP5 DDB1 CALR ANAPC15 CHORDC1 CEP295 USP28 CXCR5 TPR CENPF DTL MCPH1 CUL3 SND1 RAD1 NPM1 AXIN2 ZNF207 TAOK1 CEP250 RHOA CLTC RPS27L CHMP1A MEPCE TRIM37 CDK4 ATM CEP85 YTHDF2 ZWINT CD28 FEN1 RPL26 TOPAZ1 PTPN11 CTDSP…
1.67245e-06	161	957	1.54245	Negative regulation of nucleobase-containing compound metabolic process	http://amigo.geneontology.org/amigo/term/GO:0045934	XRCC6 EP300 ACVRL1 RARG SARNP YBX3 PPHLN1 PARPBP JARID2 CDKN1A RUNX2 SIN3A ZC3H14 GSC THAP11 CEBPA RBM42 ZBTB32 IRF2BP1 DHX34 ATF5 NR1H2 CC2D1B ZBTB2 CITED2 HDAC2 COPS2 CAPN3 NDN BMP4 ZHX1 TRPS1 PEX2 TERF1 HDGF PBXIP1 RBL1 MAFK ERCC4 RNPS1 ZC3H8 ARID5A ATOH8 LRPPRC SRSF7 YWHAQ DACH1 PSPC1 SEMA4D NCOR2 DKK1 HIF1AN BAG3 CTBP2 HNRNPU SUV39H2 SATB1 NR2C2 WWTR1 MECOM SKIL YEATS2 HCLS1 MORC1 RBBP7 DKC1…
2.15422e-06	37	127	2.67113	Spliceosomal complex	http://amigo.geneontology.org/amigo/term/GO:0005681	SNRPF PRPF4B SNRPC SF3A3 CDC40 SNRPA1 ZCCHC8 SNRPD3 HNRNPU RBMX API5 LSM7 CWC15 SF3B1 CWC27 EFTUD2 SRSF1 GCFC2 LSM8 HNRNPK SNW1 SRRM2 SNRPE SNRNP70 SNRPG PRPF18 YBX1 RBM8A TRA2B DDX5 SNRPD2 U2AF2 PHF5A CRNKL1 LSM2 MFAP1 ZNF830
3.01688e-06	61	269	2.07909	Heterocycle catabolic process	http://amigo.geneontology.org/amigo/term/GO:0046700	SKIV2L DXO ZC3H14 DHX34 IL4I1 ACOT7 PABPC4 PNLDC1 NT5E EXOSC3 EIF3E DPYS RIDA DPYD HMOX2 RNPS1 LRPPRC PUM2 TDO2 DIS3 DNA2 SAMD4B HNRNPU VIM AIFM1 DKC1 PRR5L LSM7 KHSRP ELAVL1 DCPS ANGEL2 FASTKD2 ZC3HAV1 SND1 NPM1 AXIN2 MEIOC BLVRB CDA TIRAP DCP1A TARDBP IGF2BP1 FASTK UPF3A CARHSP1 NCBP2 YTHDF2 SECISBP2 YBX1 RBM8A FEN1 THRAP3 DDX5 SMG1 HPRT1 LSM2 HMOX1 YTHDF1 ERN2
3.11548e-06	135	775	1.59709	Protein transport	http://amigo.geneontology.org/amigo/term/GO:0015031	MON2 CDKN1A SCAMP2 CPLX3 AP4S1 IPO4 AKAP5 VIPAS39 HSP90AA1 AP1G1 PDCD5 YIF1B NR1H2 PARK7 TCP1 RIMS1 SNX3 AP4E1 SCG5 BMP4 YWHAZ PEX2 COPA LMNA FERMT1 SEC23B YWHAB SNX21 TFR2 STX1A PKD1 GCC2 PEX13 YWHAQ AFM USO1 HADH MTTP CLU RAN RPH3A ERP29 YWHAH UFD1 VPS26A SEC24C AP3M1 CCDC186 BAG3 WDR11 MYRIP GRIP2 CHCHD4 RAB7A HCLS1 CDK16 AIFM1 GPR119 LRP5 POLA2 STX3 PRR5L TIMM44 ELAVL1 TIMM29 CALR RUFY1 SAR1B…
3.16618e-06	77	372	1.89777	DOID:9008939 Breast Neoplasms	ftp://ftp.rgd.mcw.edu/pub/data_release	EP300 DEK CDKN1A VEGFA MFGE8 MAN2C1 MMP14 SLC28A1 EPB41L3 ZSWIM5 RPS8 CD109 SETBP1 RAD51 SERPINB5 BMP4 RPS6 DPYD UBE2C CLU MTR ACTA2 EXO1 VIM MECOM PAK2 REPS2 MED12 OGT MAP2K7 DNMT1 MDM4 CENPF MCPH1 NRG1 ACVR1 SF3B1 BARD1 PHB MAP2K4 ERBB3 NRIP1 ZEB2 BRIP1 RHOA DEPP1 PDGFRB EIF6 TGM2 RIBC2 ATM STMN1 KLHDC10 SLC39A6 DLL1 YBX1 CUL5 FBL RPS7 YAP1 AKAP12 CADM1 XRCC2 FLNA LLGL2 H6PD TM6SF2 C1QBP RPL23A…
3.37029e-06	61	270	2.07139	Cellular nitrogen compound catabolic process	http://amigo.geneontology.org/amigo/term/GO:0044270	SKIV2L DXO ZC3H14 DHX34 IL4I1 ACOT7 PABPC4 PNLDC1 NT5E EXOSC3 EIF3E DPYS RIDA DPYD HMOX2 RNPS1 LRPPRC PUM2 TDO2 DIS3 DNA2 SAMD4B HNRNPU VIM AIFM1 DKC1 PRR5L LSM7 KHSRP ELAVL1 DCPS ANGEL2 FASTKD2 ZC3HAV1 SND1 NPM1 AXIN2 MEIOC BLVRB CDA TIRAP DCP1A TARDBP IGF2BP1 FASTK UPF3A CARHSP1 NCBP2 YTHDF2 SECISBP2 YBX1 RBM8A FEN1 THRAP3 DDX5 SMG1 HPRT1 LSM2 HMOX1 YTHDF1 ERN2
3.42199e-06	113	619	1.67373	Negative regulation of gene expression	http://amigo.geneontology.org/amigo/term/GO:0010629	ACVRL1 CNPY2 PPHLN1 RIPK1 DXO CDKN1A HSP90AB1 ARG2 ZC3H14 LGMN LSM14A RBM42 DHX34 PARK7 PABPC4 PNLDC1 CITED2 CCN2 BMP4 ANXA1 EXOSC3 EIF3E RIDA CD84 FERMT1 SLC24A3 DDRGK1 RBL1 RNPS1 ATOH8 SRSF7 EMILIN1 PUM2 NCOR2 ERP29 UFD1 SAMD4B HNRNPU VIM FXR1 MORC1 PHF8 RNF128 PC PRR5L LSM7 KHSRP ELAVL1 DNMT1 CALR AKAP8 RPS3 DCPS TPR ANGEL2 FASTKD2 SERPINE2 ZC3HAV1 SND1 NPM1 AXIN2 MEIOC STAT3 GGNBP2 TIRAP DCP1…
3.42561e-06	105	563	1.70993	Microtubule organizing center	http://amigo.geneontology.org/amigo/term/GO:0005815	BICD1 CCDC77 MAK PHF1 PKHD1 BBOF1 DLST NEK9 CEP128 CFAP20 ARHGAP35 RUVBL2 ATF5 KIF17 CEP192 TCP1 CCDC68 LEO1 NDN VPS4B DLGAP5 CNTLN ODF2 SPATC1 LRRCC1 CSPP1 DCLRE1B RBM39 ARFGEF2 IFT140 TEDC2 CCT4 GEN1 SLAIN2 NEK1 RAN CCDC92 MPHOSPH9 DYNLL1 ACADS SNAP29 CEP55 BLOC1S2 ACTR1A WDR11 BCCIP HNRNPU KIF5B PRKAR2A POC1A ACTR8 CD86 NIT2 DENND1C RGS14 CCDC81 CTSC CEP295 CCDC15 AKAP9 DTL TTI2 OLA1 ALS2 CUL3…
3.46813e-06	86	433	1.82099	Negative regulation of cellular component organization	http://amigo.geneontology.org/amigo/term/GO:0051129	PACSIN2 EP300 ACVRL1 MDM1 MAK RIN3 NR1H2 DRAXIN RCC2 WASF2 OMA1 TTK TMOD2 TJP1 BMP4 MTBP TERF1 SDCBP PFDN2 LMNA TMOD4 DNAI3 DLC1 PFDN4 ERCC4 ANTXR1 EMILIN1 GEN1 SLIT2 SPRY2 CLU HIP1R ANKRD13A CORO1C YWHAH SAMD8 DKK1 HNRNPU VIM MCM2 RYK NLGN1 HRG PAK2 ARHGAP6 PHF8 SLC25A5 NAA10 SWAP70 PRKCSH ANAPC15 ARAP1 TPR LMOD2 RAD1 NPM1 GFAP ZNF207 TAOK1 PHF23 NTN1 PHLDB2 CARMIL2 CRMP1 TRIM37 H3F3B VAT1 TRAF3…
4.70324e-06	72	343	1.92458	Positive regulation of organelle organization	http://amigo.geneontology.org/amigo/term/GO:0010638	PPHLN1 CFL2 PDCD5 ARHGAP35 MAP3K4 TCP1 CCN2 VPS4B ANXA1 SDCBP PFDN2 CCT3 RHOC ELAPOR1 DNAI3 ARPC1B CCT7 CCT4 SLAIN2 HIP1R ARPC3 DRG1 ACTN2 PIP4K2A ARPC4 SLC25A5 DKC1 LRP5 SWAP70 MAP2K7 DNMT1 TMED9 VDAC1 RPS3 CEP295 AKAP9 ARPC5 TPR ACTR3 CUL3 SSBP1 LMOD2 SEPTIN9 GRB2 TAPT1 RHOA ARHGEF5 CARMIL2 ATM IL20RB VPS35 GMFB SHCBP1L ATP5IF1 CD28 FEN1 PLAUR INS BAG4 MECP2 RAC1 G3BP1 SFPQ FGF8 VASP WDR1 WAS G…
4.70324e-06	58	254	2.09359	Regulation of supramolecular fiber organization	http://amigo.geneontology.org/amigo/term/GO:1902903	CFL2 ARHGAP35 WASF2 CCN2 TMOD2 TJP1 PFDN2 TMOD4 RHOC DNAI3 DLC1 PFDN4 ARPC1B EMILIN1 SLIT2 SLAIN2 CLU HIP1R ARPC3 DRG1 ACTN2 ARPC4 PAK2 HCLS1 ARHGAP6 SWAP70 ARAP1 RPS3 AKAP9 ARPC5 ACTR3 LMOD2 GRB2 TAOK1 RHOA PHLDB2 ARHGEF5 CARMIL2 IL20RB STMN1 GMFB CAMSAP2 SSH3 CAPZA2 MAPRE3 BAG4 MECP2 CGNL1 RAC1 VASP WDR1 CRYAB WAS GSN ALMS1 PFDN1 PPM1E CAV3
5.55469e-06	57	249	2.0988	Parkinson disease	http://www.genome.jp/kegg-bin/show_pathway?ssc05012	TUBA1A ATP5F1B TUBB ITPR3 COX6B DHDH PARK7 ATP5F1A PSMC6 TXN ATF6 PSMD4 UQCRC2 TRAP1 COX5B LOC100516606 SAMD8 NDUFB6 KIF5B CALML5 UQCRC1 UBA1 SLC25A5 KLC2 RAPSN VDAC1 NDUFA2 CAMK2A PSMC2 PSMD1 NDUFS6 ATP5MC1 SDHA NDUFV3 UCHL1 NDUFS7 COX5A PSMB1 SLC39A6 LOC100624067 XBP1 NDUFB4 CYC1 NDUFS3 ATP5PD EIF2S1 SLC25A6 SLC11A2 ATP5F1C BCL2L1 ATP5F1D PSMD9 ATP5PB NDUFA5 ADRM1 PSMC4 DDIT3
5.73926e-06	31	100	2.84222	PW:0001066 ribosome biogenesis pathway	ftp://ftp.rgd.mcw.edu/pub/data_release	POP4 RPS11 RPS8 MDN1 RPL4 RPS6 RCL1 RPL30 POP7 RPL21 DIS3 RAN RPS28 TCOF1 RPS3 EIF6 RPS27L NVL RPL29 NOP56 RPL26 RPS9 FBL RPS7 GNL2 RPL23A RPS15A RPL32 RPL7A RPL15 RPL28
5.73959e-06	149	887	1.54014	Negative regulation of RNA metabolic process	http://amigo.geneontology.org/amigo/term/GO:0051253	XRCC6 EP300 RARG SARNP YBX3 PPHLN1 JARID2 RUNX2 SIN3A ZC3H14 GSC THAP11 CEBPA RBM42 ZBTB32 IRF2BP1 DHX34 ATF5 NR1H2 CC2D1B ZBTB2 CITED2 HDAC2 COPS2 CAPN3 NDN BMP4 ZHX1 TRPS1 PEX2 HDGF PBXIP1 RBL1 MAFK RNPS1 ZC3H8 ARID5A ATOH8 LRPPRC SRSF7 YWHAQ DACH1 PSPC1 SEMA4D NCOR2 DKK1 HIF1AN BAG3 CTBP2 HNRNPU SUV39H2 SATB1 NR2C2 WWTR1 MECOM SKIL YEATS2 HCLS1 MORC1 RBBP7 DKC1 RELA PRDX5 RCOR2 ELAVL1 SMARCA4 …
5.77142e-06	166	1014	1.50095	Regulation of protein modification process	http://amigo.geneontology.org/amigo/term/GO:0031399	XRCC6 EP300 ACVRL1 PTPRO PPP6R2 RIPK1 JARID2 PHF1 CDKN1A HSP90AB1 SIN3A ARRDC4 CCDC88C HSP90AA1 SAE1 RUVBL2 PARK7 DOCK7 CDC20 MAP3K4 NCOA7 CD109 CAPN3 RAD51 NDN FANCM BMP4 MTBP SDCBP DDR2 LMNA CCN1 DLC1 DDRGK1 YWHAB CASS4 PKD1 SPDYA EMILIN1 SLIT2 SPRY2 SEMA4D CLU ERP29 SPPL3 CORO1C SART3 SMARCB1 DKK1 BCCIP PRKAR2A TADA3 WWTR1 SENP2 HRG PAK2 HCLS1 PAXBP1 CCNB3 OGT LOC100525798 CCNQ LRP5 RELA PRR5L…
6.98997e-06	132	765	1.58201	Chromosome	http://amigo.geneontology.org/amigo/term/GO:0005694	SUN2 RARG NUP107 CECR2 PARPBP PRPF4B H1-3 PHF1 BICRAL RUNX2 SIN3A IPO4 CCNB1IP1 CENPT E2F4 HIF3A RUVBL2 PARK7 RCC2 RPA2 SS18 RNF138 TCP1 ARID1B CITED2 HDAC2 TTK ICE2 TCF12 INO80 RAD51 IVD EXOSC3 MTBP TRPS1 TERF1 COPS5 LMNA DCLRE1B GTF2B RTF2 ERCC4 ZC3H8 LRPPRC PPP1CB RAN NCOR2 DYNLL1 PES1 SMARCB1 HIRA DNA2 HNRNPU APTX SUV39H2 WDR82 ACTR8 XPC MCM2 STAG1 CHAF1B RBBP7 UBA1 CENPI THOC2 RBMX PPP1CA RE…
8.13227e-06	49	203	2.21308	Positive regulation of cell cycle	http://amigo.geneontology.org/amigo/term/GO:0045787	SIN3A TGM1 LGMN RCC2 SMOC2 CITED2 INO80 VPS4B ANXA1 TRIM32 MTBP CSPP1 CRNN NSFL1C UBE2C PKD1 SPAST GEN1 CUL4A HNRNPU LRP5 CALR CEP295 CXCR5 ASNS TPR DTL CUL3 NPM1 MEIOC RHOA MEPCE CDK4 CD28 FEN1 MAPRE3 TOPAZ1 PTPN11 AIF1 INS FOXG1 MECP2 C7H6orf89 SFPQ RPS15A FGF8 DBF4B RANBP1 UBE2B
9.14295e-06	61	278	2.01178	Aromatic compound catabolic process	http://amigo.geneontology.org/amigo/term/GO:0019439	SKIV2L DXO ZC3H14 DHX34 IL4I1 ACOT7 PABPC4 PNLDC1 NT5E EXOSC3 EIF3E DPYS RIDA DPYD HMOX2 RNPS1 LRPPRC PUM2 TDO2 DIS3 DNA2 SAMD4B HNRNPU VIM AIFM1 DKC1 PRR5L LSM7 KHSRP ELAVL1 DCPS ANGEL2 FASTKD2 ZC3HAV1 SND1 NPM1 AXIN2 MEIOC BLVRB CDA TIRAP DCP1A TARDBP IGF2BP1 FASTK UPF3A CARHSP1 NCBP2 YTHDF2 SECISBP2 YBX1 RBM8A FEN1 THRAP3 DDX5 SMG1 HPRT1 LSM2 HMOX1 YTHDF1 ERN2
1.02293e-05	70	337	1.90443	Amyotrophic lateral sclerosis	http://www.genome.jp/kegg-bin/show_pathway?ssc05014	TUBA1A HNRNPA1 ATP5F1B NUP107 TUBB ITPR3 SRSF3 ATG2B COX6B DHDH CEP192 ATP5F1A PSMC6 ATF6 PSMD4 VAPB ACTB UQCRC2 COX5B LOC100516606 SRSF7 DNAH10 ACTR1A NDUFB6 KIF5B UQCRC1 KLC2 RAPSN SQSTM1 VDAC1 NDUFA2 PSMC2 TPR NRG1 ALS2 PSMD1 NDUFS6 ATP5MC1 SDHA UBQLN1 DCTN4 NDUFV3 TARDBP OPTN NDUFS7 COX5A DNAI2 PSMB1 NUP35 LOC100624067 XBP1 NDUFB4 CYC1 NDUFS3 ATP5PD ALYREF EIF2S1 GPX1 ATP5F1C RAC1 BCL2L1 ATP5…
1.03016e-05	123	705	1.5996	Protein-containing complex binding	http://amigo.geneontology.org/amigo/term/GO:0044877	XRCC6 ACVRL1 MYO1A BICD1 YBX3 RIPK1 CDKN1A MFGE8 CFL2 VIPAS39 VRK1 CDH13 AMFR EIF3K RUVBL2 PARK7 SERBP1 CDC20 IGF2R CCN2 EPB41L2 SNX3 MYO1E VPS4B CCBE1 DDR2 NES TMOD4 DCLRE1B GNAT2 CCN1 DNAI3 FERMT1 ARPC1B CD2BP2 ERCC4 PTCD3 CTNNA2 ANTXR1 EMILIN1 NAA15 CLU HIP1R ARPC3 CORO1C GNAZ ACTN2 BAG3 CTBP2 HNRNPU VIM NEBL STAB1 ARPC4 XPC RAB7A EIF2A HRG MB21D2 HCLS1 EGFL6 PLS3 NAA10 DDB1 PRMT3 SGTA ICAM1 C…
1.06288e-05	51	217	2.1548	Regulation of translation	http://amigo.geneontology.org/amigo/term/GO:0006417	LSM14A EIF3K PNLDC1 LARP6 EXOSC3 EIF3E RIDA TRAP1 LRPPRC NOLC1 SAMD4B VIM EIF2A FXR1 EIF4G2 ELAVL1 CALR NANOS3 ETF1 TCOF1 RPS3 DCPS NIBAN1 TPR FASTKD2 NPM1 STAT3 DCP1A EIF6 KHDRBS1 TARDBP IGF2BP1 RPS27L TIA1 UPF3A IL20RB NCBP2 YTHDF2 SECISBP2 RPL26 MTG1 RACK1 TRNAU1AP DPH7 EIF2S1 DPH2 SHMT2 EIF5A TNRC6A YTHDF1 TYMS
1.15506e-05	182	1147	1.4548	Programmed cell death	http://amigo.geneontology.org/amigo/term/GO:0012501	EP300 RARG YBX3 CECR2 AMIGO2 DYRK2 RIPK1 GPLD1 CDKN1A HSP90AB1 PKHD1 SIN3A ARG2 LGMN ITPK1 HSP90AA1 PPP1R13B PDCD5 DHDH ATF5 PARK7 PIK3CD UBE4B DRAXIN CTH ANKRD13C OMA1 TXNDC12 TCP1 CITED2 CAPN3 UACA BMP4 RPS6 ANXA1 TRIM32 COPS5 ATF6 LMNA CCN1 GSDMD DLC1 POLB RNPS1 ZC3H8 SLIT2 NAA15 SPRY2 STK24 LAMP1 CLU HIP1R DIABLO ERP29 RYR2 SAMD8 FAS BLOC1S2 PRDX3 BAG3 MGMT NAA35 HIGD1A MCM2 MECOM SKIL HRG PA…
1.18177e-05	85	439	1.77521	Mitotic cell cycle process	http://amigo.geneontology.org/amigo/term/GO:1903047	CDKN1A PKHD1 SIN3A FBXO31 E2F4 LSM14A RCC2 NUDC RPA2 CEP192 CDC20 TTK INO80 RAD51 VPS4B BMP4 RPS6 ANXA1 MTBP NES RHOC NSFL1C UBE2C RTF2 PKD1 SPAST SPDYA GEN1 SPRY2 CUL4A RAN DRG1 DNA2 CEP55 BCCIP HNRNPU XPC TPRA1 STAG1 NAA50 RPL24 CCNB3 PHF8 NAA10 LRP5 DDB1 AKAP8 AKAP8L ANAPC15 TPR CENPF DTL MCPH1 TACC1 ACVR1 CUL3 CHMP6 ZNF207 UNC119 TAOK1 RHOA CLTC RPS27L CHMP1A MEPCE PIBF1 CDK4 STMN1 CEP85 ZWIN…
1.27288e-05	113	636	1.62899	Negative regulation of protein metabolic process	http://amigo.geneontology.org/amigo/term/GO:0051248	PTPRO JARID2 PHF1 CDKN1A HSP90AB1 SIN3A LSM14A NR1H2 PARK7 PNLDC1 NCOA7 SNX3 CD109 CAPN3 BMP4 EXOSC3 RIDA SDCBP PFDN2 CD84 DDRGK1 YWHAB PFDN4 EMILIN1 SLIT2 SPRY2 SEMA4D CLU CORO1C SMARCB1 DKK1 SAMD4B PRKAR2A WWTR1 SENP2 PAK2 OGT LRP5 RELA PRR5L PRMT3 SWAP70 SGTA DNMT1 CALR PKN1 SQSTM1 RGS14 FNIP1 RPS3 CHORDC1 UBASH3B DCPS MDM4 NIBAN1 TPR MGAT5 SNX25 DNAJC10 TFPI SERPINE2 NPM1 CHMP6 TIMP2 STAT3 PH…
1.3132e-05	63	294	1.96467	Organic cyclic compound catabolic process	http://amigo.geneontology.org/amigo/term/GO:1901361	SKIV2L DXO CYP1A2 ZC3H14 DHX34 IL4I1 ACOT7 PABPC4 PNLDC1 NT5E EXOSC3 EIF3E DPYS RIDA DPYD HMOX2 RNPS1 LRPPRC PUM2 TDO2 DIS3 YWHAH DNA2 SAMD4B HNRNPU VIM AIFM1 DKC1 PRR5L LSM7 KHSRP ELAVL1 DCPS ANGEL2 FASTKD2 ZC3HAV1 SND1 NPM1 AXIN2 MEIOC BLVRB CDA TIRAP DCP1A TARDBP IGF2BP1 FASTK UPF3A CARHSP1 NCBP2 YTHDF2 SECISBP2 YBX1 RBM8A FEN1 THRAP3 DDX5 SMG1 HPRT1 LSM2 HMOX1 YTHDF1 ERN2
1.31986e-05	241	1609	1.37327	Metabolism of proteins	https://reactome.org/download/current	EP300 DDX17 CKAP4 TUBA1A INHBE USP15 NUP107 COPS7A UBE2N RIPK1 GPLD1 RPS18 SIN3A FBXO9 FBXO31 AMFR TBCB EIF3K HIF3A SAE1 KDELR1 NUCB1 RPS11 NR1H2 ETFB RPL22 PARK7 EIF3I RPS8 CDC20 TCP1 FBXL4 SNX3 HDAC2 CD109 EEF1A1 LEO1 SCG3 COPS2 EIF3J INO80 MDGA2 PSMC6 BMP4 RPS6 NANS TXN MRPS2 EIF3E RPL30 SDC2 UBE2W COPS5 ATF6 COPA PSMD4 GNAT2 CCN1 EEF1D POLB UBE2C NEURL2 ACTB GP2 ELOB PTCD3 RNF181 FBXO41 CCT7 …
1.37277e-05	56	250	2.05374	Nucleobase-containing compound catabolic process	http://amigo.geneontology.org/amigo/term/GO:0034655	SKIV2L DXO ZC3H14 DHX34 ACOT7 PABPC4 PNLDC1 NT5E EXOSC3 EIF3E DPYS RIDA DPYD RNPS1 LRPPRC PUM2 DIS3 DNA2 SAMD4B HNRNPU VIM AIFM1 DKC1 PRR5L LSM7 KHSRP ELAVL1 DCPS ANGEL2 FASTKD2 ZC3HAV1 SND1 NPM1 AXIN2 MEIOC CDA TIRAP DCP1A TARDBP IGF2BP1 FASTK UPF3A CARHSP1 NCBP2 YTHDF2 SECISBP2 YBX1 RBM8A FEN1 THRAP3 DDX5 SMG1 HPRT1 LSM2 YTHDF1 ERN2
1.37521e-05	176	1105	1.46032	Apoptotic process	http://amigo.geneontology.org/amigo/term/GO:0006915	EP300 RARG YBX3 CECR2 AMIGO2 DYRK2 RIPK1 GPLD1 CDKN1A HSP90AB1 PKHD1 SIN3A ARG2 LGMN HSP90AA1 PPP1R13B PDCD5 DHDH ATF5 PARK7 PIK3CD UBE4B DRAXIN CTH ANKRD13C OMA1 TXNDC12 TCP1 CITED2 CAPN3 UACA BMP4 RPS6 ANXA1 TRIM32 COPS5 ATF6 LMNA CCN1 DLC1 POLB RNPS1 ZC3H8 SLIT2 NAA15 SPRY2 STK24 CLU HIP1R DIABLO ERP29 RYR2 SAMD8 FAS BLOC1S2 PRDX3 BAG3 MGMT NAA35 HIGD1A MCM2 SKIL HRG PAK2 HCLS1 OGT SLC25A5 AIF…
1.37521e-05	85	441	1.76716	DOID:684 hepatocellular carcinoma	ftp://ftp.rgd.mcw.edu/pub/data_release	EP300 HNRNPA1 PPP1R1A CDKN1A VEGFA POLG CYP1A2 CEBPA NR1H2 KIF1B PGD CDC20 ARID1B HDAC2 TTK CAPN3 SERPINB5 CCBE1 UACA DLGAP5 RPS6 JAK2 MTBP YWHAZ COPS5 DPYD CCN1 UBE2C ACTB TEDC2 ANTXR1 SLIT2 ERP29 GNAZ CEP55 EXO1 MCM2 CHAF1B GPC3 FAM111B C3 VAV1 CARM1 DNMT1 CRHBP HSPA9 CENPF DTL CSMD1 IRF2 SF3B1 ING3 IL6ST ACOX1 PHB ABCC3 ACACA KMT2C ADAMTS13 SNW1 IGF2BP1 CTSB G6PD ATM STMN1 YTHDF2 ZWINT LRRC59 …
1.40232e-05	21	55	3.50069	SWI/SNF superfamily-type complex	http://amigo.geneontology.org/amigo/term/GO:0070603	CECR2 BICRAL RUVBL2 SS18 ARID1B HDAC2 INO80 SMARCB1 ACTR8 RBBP7 SMARCA4 BRD8 ING3 CHD3 HMGXB4 EP400 PHF10 BPTF BRD9 SS18L1 PBRM1
1.46445e-05	287	1979	1.32964	Phosphate-containing compound metabolic process	http://amigo.geneontology.org/amigo/term/GO:0006796	XRCC6 EP300 ACVRL1 ATP5F1B USP15 PTPRO STYK1 DYRK2 PPP6R2 PRPF4B RIPK1 MAK GPLD1 CDKN1A MOCS1 HSP90AB1 GPHN NEK9 CCDC88C ITPK1 VRK1 HSP90AA1 GPI NR1H2 ACOT7 PARK7 PIK3CD PGD CEP192 DOCK7 CTPS1 MAP3K4 PPP1R14C NT5E TTK CD109 ATP5F1A COPS2 PLA2G4D RAD51 BMP4 JAK2 DPYS YWHAZ PDP1 SDCBP STYXL2 DDR2 DPYD RPAP2 CCN1 EEF1D DLC1 ACSS1 PANK2 DDRGK1 MYLK2 RBL1 YWHAB CASS4 CD2BP2 PKD1 MAP4K3 SPDYA PPP1CB EM…
1.68312e-05	53	233	2.08553	Structural constituent of ribosome	http://amigo.geneontology.org/amigo/term/GO:0003735	RPS18 RPS19 RPS11 RPL22 RPS8 RPL4 RPLP1 RPS6 MRPS2 RPL30 RPS3A RPL21 MRPL43 RPL24 RPLP2 MRPL11 MRPL49 RPS28 MRPL4 RPL18A RPL27A RPS3 RPL19 RPS21 RPS27L RPL11 RPL13 RPL27 ATM RPL18 RPS17 RPL29 RPL26 RPS9 RPS7 MRPS14 RPL7 MRPL12 RPS15 RPS2 RPL35 RPL17 RPL23A RPL36A RPS15A RPL32 RPL10 RPS25 RPL15 RPL23 RPL28 RPS24 RPL3
1.72828e-05	288	1991	1.32623	Phosphorus metabolic process	http://amigo.geneontology.org/amigo/term/GO:0006793	XRCC6 EP300 ACVRL1 ATP5F1B USP15 PTPRO STYK1 DYRK2 PPP6R2 PRPF4B RIPK1 MAK GPLD1 CDKN1A MOCS1 HSP90AB1 GPHN NEK9 CCDC88C ITPK1 VRK1 HSP90AA1 GPI NR1H2 ACOT7 PARK7 PIK3CD PGD CEP192 DOCK7 CTPS1 MAP3K4 PPP1R14C NT5E TTK CD109 ATP5F1A COPS2 PLA2G4D RAD51 BMP4 JAK2 DPYS YWHAZ PDP1 SDCBP STYXL2 DDR2 DPYD RPAP2 CCN1 EEF1D DLC1 ACSS1 PANK2 DDRGK1 MYLK2 RBL1 YWHAB CASS4 CD2BP2 PKD1 MAP4K3 SPDYA PPP1CB EM…
1.76829e-05	72	356	1.8543	Positive regulation of cellular component biogenesis	http://amigo.geneontology.org/amigo/term/GO:0044089	PPHLN1 AMIGO2 HSP90AA1 ARHGAP35 NR1H2 PARK7 WASF2 ADGRL2 CCN2 VPS4B TERF1 SDCBP RHOC ELAPOR1 DNAI3 FERMT1 ARPC1B NPHP1 EMILIN1 SLAIN2 SEMA4D CLU HIP1R ARPC3 DRG1 PIP4K2A ARPC4 RAB7A NLGN1 HRG SRPX2 SLITRK2 SWAP70 DNMT1 FNIP1 ARAP1 RPS3 CEP295 MMP1 AKAP9 ARPC5 TPR ACTR3 NRG1 LMOD2 SEPTIN9 GRB2 CDC42EP4 TAPT1 RHOA PHLDB2 TIRAP ARHGEF5 CARMIL2 FLOT1 IL20RB GMFB RACK1 ATP13A2 HGS BAG4 MECP2 RAC1 G3BP…
1.92779e-05	21	56	3.43817	ATPase complex	http://amigo.geneontology.org/amigo/term/GO:1904949	CECR2 BICRAL RUVBL2 SS18 ARID1B HDAC2 INO80 SMARCB1 ACTR8 RBBP7 SMARCA4 BRD8 ING3 CHD3 HMGXB4 EP400 PHF10 BPTF BRD9 SS18L1 PBRM1
2.04335e-05	190	1220	1.42788	Cellular response to stress	http://amigo.geneontology.org/amigo/term/GO:0033554	XRCC6 EP300 YBX3 PARPBP DYRK2 RIPK1 DEK TDP2 PHF1 CDKN1A TFEB HSP90AB1 POLG MBIP SLC12A6 ARG2 CCDC88C FBXO31 AMFR NR1H2 PARK7 RPA2 RNF138 OMA1 TXNDC12 MAP3K4 ARMT1 CITED2 CCN2 NCOA7 ASCC3 TPM1 CAPN3 INO80 RAD51 FANCM PSMC6 TNC TRIM32 COPS5 ATF6 UFC1 LMNA DCLRE1B MAGI3 ELAPOR1 POLB DDRGK1 RBL1 VAPB AP5Z1 GTF2I ERCC4 SEMA4C FANCL SPDYA GEN1 STK24 CUL4A CLU NEK1 DIABLO ERP29 UFD1 DNA2 HIF1AN PRDX3 B…
2.06267e-05	60	279	1.97171	Actin filament organization	http://amigo.geneontology.org/amigo/term/GO:0007015	CFL2 ARHGAP35 WASF2 CCN2 TMOD2 TJP1 TMOD4 RHOC DNAI3 DLC1 CASS4 ARPC1B CTNNA2 SLIT2 FHDC1 HIP1R RHOF ARPC3 ACTN2 NEBL ARPC4 PAK2 HCLS1 ARHGAP6 TMSB4 TMSB15B PLS3 CFL1 SWAP70 ARAP1 ARPC5 ACTR3 CUL3 LMOD2 BAIAP2 GRB2 RHOA PHLDB2 ARHGEF5 CARMIL2 IL20RB STMN1 GMFB SSH3 CAPZA2 SPATC1L AIF1 FLNA BAG4 CGNL1 RAC1 RFLNA VASP WDR1 WAS GSN MARCKS ALMS1 PPM1E CAV3
2.06267e-05	204	1329	1.40735	Organic substance transport	http://amigo.geneontology.org/amigo/term/GO:0071702	ESYT1 MON2 NUP107 RIPK1 SLC44A4 SLC26A8 SRSF3 CDKN1A SCAMP2 CPLX3 AP4S1 IPO4 AKAP5 NPC2 VIPAS39 HSP90AA1 SLC28A1 AP1G1 PDCD5 YIF1B NR1H2 PARK7 SLC45A1 TCP1 RIMS1 SNX3 SLC14A1 AP4E1 SCG5 VPS4B BMP4 ANXA1 YWHAZ PEX2 CRH COPA LMNA ABCA4 LRRC8C FERMT1 SEC23B YWHAB SNX21 ACTB TFR2 STX1A PKD1 GCC2 PEX13 ABCG8 YWHAQ MFSD10 AFM USO1 HADH MTTP ABCG2 ARHGEF7 CLU RAN RPH3A ERP29 YWHAH UFD1 VPS26A PSAP SEC24…
2.37107e-05	57	261	2.00231	Regulation of cellular amide metabolic process	http://amigo.geneontology.org/amigo/term/GO:0034248	LSM14A EIF3K PNLDC1 LARP6 EXOSC3 EIF3E RIDA CCN1 TRAP1 LRPPRC CLU PGAM1 NOLC1 SAMD4B VIM EIF2A FXR1 RELA EIF4G2 ELAVL1 CALR NANOS3 ETF1 TCOF1 RPS3 DCPS NIBAN1 TPR FASTKD2 NPM1 STAT3 ORMDL3 DCP1A EIF6 KHDRBS1 TARDBP IGF2BP1 RPS27L TIA1 UPF3A IL20RB NCBP2 YTHDF2 SECISBP2 RPL26 MTG1 RACK1 TRNAU1AP DPH7 EIF2S1 DPH2 SHMT2 EIF5A TNRC6A PIN1 YTHDF1 TYMS
2.37401e-05	89	475	1.71788	Centrosome	http://amigo.geneontology.org/amigo/term/GO:0005813	BICD1 CCDC77 MAK PHF1 PKHD1 DLST NEK9 RUVBL2 ATF5 CEP192 TCP1 LEO1 NDN VPS4B DLGAP5 CNTLN ODF2 SPATC1 LRRCC1 CSPP1 DCLRE1B RBM39 IFT140 CCT4 GEN1 SLAIN2 NEK1 CCDC92 DYNLL1 ACADS SNAP29 CEP55 ACTR1A BCCIP HNRNPU KIF5B PRKAR2A POC1A ACTR8 CD86 NIT2 DENND1C RGS14 CCDC81 CTSC CEP295 CCDC15 AKAP9 DTL TTI2 OLA1 ALS2 CUL3 CEP41 NPM1 AXIN2 HOXB4 UNC119 CDC16 CEP250 CHD3 DCTN4 TAPT1 FLOT1 CRMP1 DCAF12 PIB…
2.58656e-05	91	490	1.70271	Intracellular protein transport	http://amigo.geneontology.org/amigo/term/GO:0006886	CDKN1A IPO4 AKAP5 VIPAS39 HSP90AA1 AP1G1 PDCD5 PARK7 RIMS1 AP4E1 SCG5 BMP4 YWHAZ PEX2 COPA LMNA FERMT1 SEC23B YWHAB STX1A PKD1 GCC2 PEX13 YWHAQ USO1 RAN RPH3A YWHAH UFD1 VPS26A SEC24C AP3M1 BAG3 WDR11 MYRIP GRIP2 CHCHD4 RAB7A HCLS1 AIFM1 POLA2 STX3 PRR5L TIMM44 ELAVL1 TIMM29 CALR SAR1B HSPA9 VPS11 SRPRA PMPCB TPR PTPN14 BARD1 RAMP1 STAM2 AGK SRP68 GFAP STAT3 CLTC TARDBP KPNA3 SNX17 CSE1L SRP19 VP…
2.58656e-05	89	476	1.71427	Supramolecular fiber organization	http://amigo.geneontology.org/amigo/term/GO:0097435	RIPK1 COL11A2 HSP90AB1 CFL2 VIPAS39 ARHGAP35 WASF2 CEP192 CCN2 TPM1 TMOD2 CAPN3 TJP1 DDR2 PFDN2 CASQ1 TMOD4 RHOC COL11A1 DNAI3 DLC1 PFDN4 CASS4 ARPC1B CTNNA2 EMILIN1 SLIT2 SLAIN2 FHDC1 CLU HIP1R RHOF ARPC3 DRG1 ACTN2 VIM NEBL ARPC4 PAK2 HCLS1 ARHGAP6 TMSB4 TMSB15B PLS3 CFL1 SWAP70 ARAP1 RPS3 AKAP9 ARPC5 ACTR3 CUL3 LMOD2 BAIAP2 GRB2 GFAP FKBP10 P3H4 TAOK1 RHOA PHLDB2 ARHGEF5 CARMIL2 IL20RB STMN1 G…
2.73692e-05	53	237	2.05033	Ribonucleoprotein complex biogenesis	http://amigo.geneontology.org/amigo/term/GO:0022613	SNU13 SNRPF SNRPC HSP90AB1 HSP90AA1 SF3A3 MDN1 RPS6 PSIP1 RCL1 EXOSC3 MRPS2 ESF1 CUL4A RAN DENR SART3 PES1 SNRPD3 EIF2A RPL24 DKC1 TRMT112 CPSF7 RPS28 UTP15 CLNS1A SF3B1 FASTKD2 NPM1 SRSF1 AATF GCFC2 RRP1B EIF6 SNRPE SNRPG RPL27 NVL YTHDF2 RPL26 NOL9 USP39 FBL CLP1 RPL7 SNRPD2 C1QBP RPL7A SRSF10 RPS25 CRNKL1 LSM2
2.91633e-05	191	1235	1.41796	Cell death	http://amigo.geneontology.org/amigo/term/GO:0008219	EP300 RARG YBX3 CECR2 AMIGO2 DYRK2 RIPK1 GPLD1 CDKN1A HSP90AB1 PKHD1 SIN3A ARG2 LGMN ITPK1 HSP90AA1 PPP1R13B PDCD5 DHDH ATF5 PARK7 PIK3CD UBE4B DRAXIN CTH ANKRD13C OMA1 TXNDC12 TCP1 CITED2 NCOA7 CAPN3 VPS4B UACA BMP4 RPS6 ANXA1 TRIM32 YWHAZ COPS5 ATF6 LMNA CCN1 GSDMD DLC1 POLB RNPS1 ZC3H8 SLIT2 NAA15 SPRY2 STK24 LAMP1 CLU HIP1R DIABLO ERP29 RYR2 SAMD8 FAS BLOC1S2 PRDX3 BAG3 MGMT NAA35 HIGD1A MCM2…
3.14281e-05	81	423	1.75566	Chromatin	http://amigo.geneontology.org/amigo/term/GO:0000785	RARG CECR2 PARPBP H1-3 BICRAL RUNX2 SIN3A IPO4 E2F4 HIF3A RUVBL2 PARK7 RPA2 SS18 TCP1 ARID1B CITED2 HDAC2 ICE2 TCF12 INO80 RAD51 EXOSC3 MTBP TRPS1 COPS5 ZC3H8 RAN NCOR2 SMARCB1 HIRA APTX SUV39H2 WDR82 ACTR8 MCM2 STAG1 CHAF1B RBBP7 UBA1 RBMX RELA SMARCA4 DNMT1 AKAP8L BRD8 ORC5 ING3 STAT3 CBX1 MSH6 NRIP1 ZEB2 CHD3 WBP2 NUCKS1 HNRNPK TGM2 H3F3B TAF4 CDK4 HMGXB4 POU4F2 KDM4A EP400 PHF10 MACROH2A2 BPT…
3.23901e-05	30	103	2.67043	Regulation of mRNA catabolic process	http://amigo.geneontology.org/amigo/term/GO:0061013	ZC3H14 DHX34 PABPC4 PNLDC1 EXOSC3 RIDA PUM2 SAMD4B HNRNPU VIM PRR5L ELAVL1 DCPS ANGEL2 FASTKD2 ZC3HAV1 NPM1 AXIN2 MEIOC TIRAP DCP1A TARDBP IGF2BP1 FASTK CARHSP1 YTHDF2 SECISBP2 YBX1 THRAP3 YTHDF1
3.38672e-05	63	303	1.90631	Transcription coregulator activity	http://amigo.geneontology.org/amigo/term/GO:0003712	EP300 DDX17 MAK TRIM15 SIN3A IRF2BP1 RUVBL2 PARK7 SS18 CITED2 NCOA7 COPS2 TRIM32 HDGF PBXIP1 ARID5A MAML3 NCOR2 SMARCB1 ACTN2 CTBP2 HNRNPU TADA3 XPC WWTR1 MED14 MED12 RCOR2 SMARCA4 PKN1 SIN3B BRD8 MED17 BCL9L PTPN14 NRG1 NPM1 PSMC3IP PHB MED11 GPS2 MED9 NRIP1 WBP2 RRP1B NUCKS1 SNW1 TRIM37 URI1 DR1 THRAP3 YAP1 MED22 TLE5 TRIM14 SPEN MECP2 C1QBP SS18L1 TRIM28 RBM4 IRF2BP2 MED20
3.46582e-05	150	925	1.48678	Regulation of phosphate metabolic process	http://amigo.geneontology.org/amigo/term/GO:0019220	XRCC6 EP300 ACVRL1 PTPRO PPP6R2 RIPK1 CDKN1A HSP90AB1 CCDC88C HSP90AA1 PARK7 CEP192 DOCK7 MAP3K4 PPP1R14C CD109 RAD51 BMP4 SDCBP DDR2 CCN1 DLC1 DDRGK1 RBL1 YWHAB CASS4 CD2BP2 PKD1 SPDYA EMILIN1 SLIT2 RBM26 SPRY2 SEMA4D CLU ERP29 DYNLL1 SPPL3 CORO1C DKK1 PGAM1 PRDX3 BCCIP HNRNPU PIP4K2A PRKAR2A TADA3 WWTR1 SLC7A14 HRG PAK2 HCLS1 CCNB3 OGT SRPX2 CCNQ LRP5 DGKZ PRR5L SWAP70 C3 CDC37 PKN1 AKAP8 AKAP8…
3.46582e-05	150	925	1.48678	Regulation of phosphorus metabolic process	http://amigo.geneontology.org/amigo/term/GO:0051174	XRCC6 EP300 ACVRL1 PTPRO PPP6R2 RIPK1 CDKN1A HSP90AB1 CCDC88C HSP90AA1 PARK7 CEP192 DOCK7 MAP3K4 PPP1R14C CD109 RAD51 BMP4 SDCBP DDR2 CCN1 DLC1 DDRGK1 RBL1 YWHAB CASS4 CD2BP2 PKD1 SPDYA EMILIN1 SLIT2 RBM26 SPRY2 SEMA4D CLU ERP29 DYNLL1 SPPL3 CORO1C DKK1 PGAM1 PRDX3 BCCIP HNRNPU PIP4K2A PRKAR2A TADA3 WWTR1 SLC7A14 HRG PAK2 HCLS1 CCNB3 OGT SRPX2 CCNQ LRP5 DGKZ PRR5L SWAP70 C3 CDC37 PKN1 AKAP8 AKAP8…
3.46582e-05	64	310	1.89284	Organelle localization	http://amigo.geneontology.org/amigo/term/GO:0051640	SUN2 ESYT1 MYO1A BICD1 TFEB PKHD1 NUDC VPS4B YWHAZ TERF1 ARMC1 CD84 LMNA NSFL1C STX1A PEX13 SPAST USO1 SPRY2 LAMP1 RAN SNAP29 AP3M1 BLOC1S2 CCDC186 WDR11 CTBP2 HNRNPU KIF5B RAB7A NLGN1 KLC2 STX3 STXBP2 TMED9 LAMTOR1 AKAP9 CENPF ACTR3 MCPH1 CUL3 STK25 EXOC4 NPM1 CHMP6 SLC9A3R1 MEIOC RAB34 NTN1 NDRG4 PPFIA3 UCHL1 CDH3 SYN2 CHMP1A PIBF1 ATM VAMP7 SNAPIN CLN3 BLOC1S6 UBE2B NDE1 CAV3
3.46582e-05	21	58	3.31962	Negative regulation of mRNA metabolic process	http://amigo.geneontology.org/amigo/term/GO:1903312	ZC3H14 RBM42 DHX34 RNPS1 SRSF7 HNRNPU ELAVL1 ANGEL2 NPM1 AXIN2 MEIOC TIRAP HNRNPK TARDBP IGF2BP1 SECISBP2 YBX1 THRAP3 U2AF2 C1QBP SRSF10
3.57624e-05	240	1625	1.35411	Regulation of molecular function	http://amigo.geneontology.org/amigo/term/GO:0065009	XRCC6 EP300 CNPY2 PTPRO CRACR2A PPP6R2 RIPK1 TRIM26 TRIM15 CDKN1A HSP90AB1 PKHD1 SIN3A ARRDC4 AKAP5 SIPA1L1 AHSA1 LGMN HSP90AA1 NQO1 AMFR PDCD5 NR1H2 PARK7 RCC2 GRHL3 EPB41 CEP192 MAPRE2 CTH ANKRD13C DOCK7 CDC20 MAP3K4 TCP1 HDAC2 CAPN3 NDN LARP6 BMP4 TRIM32 EIF3E TERF1 COPS5 CRH DDR2 CASQ1 SPTA1 NES CRNN RHOC GTF2B CCN1 DLC1 DDRGK1 RBL1 YWHAB CASS4 ACTB CD2BP2 ERCC4 PKD1 ANTXR1 CCT4 SPDYA ELMOD2 …
3.89181e-05	283	1972	1.31576	Positive regulation of nitrogen compound metabolic process	http://amigo.geneontology.org/amigo/term/GO:0051173	XRCC6 EP300 DDX17 ACVRL1 RARG RIPK1 JARID2 GPLD1 PHF1 CDKN1A TFEB HSP90AB1 RUNX2 BNC1 SIN3A NRL ARRDC4 LGMN HSP90AA1 CDH13 E2F4 PDCD5 CEBPA SAE1 RUVBL2 IL4I1 ATF5 NR1H2 PARK7 GRHL3 SS18 DOCK7 CDC20 SMOC2 MAP3K4 PNLDC1 TCP1 CITED2 NCOA7 HDAC2 ICE2 TCF12 LEO1 CAPN3 INO80 RAD51 NDN CCBE1 LARP6 FANCM BMP4 EXOSC3 TRIM32 EIF3E RIDA COPS5 TOX SDCBP RXRG DDR2 ATF6 CCT3 GLMP LMNA CCN1 DLC1 DDRGK1 CASS4 TF…
3.9838e-05	113	653	1.58658	Nucleolus	http://amigo.geneontology.org/amigo/term/GO:0005730	SNU13 XRCC6 TXNRD1 ITPR3 CDKN1A RCN2 MBIP ACIN1 ZC3H14 VRK1 POP4 FBLIM1 TAF4B NOL4 MDN1 FILIP1 LEO1 RPS6 SNAPC3 RCL1 ZCCHC7 EXOSC3 TERF1 TCEA1 GORAB SELENBP1 RPAP2 EEF1D DDRGK1 POP7 CD2BP2 GTF3C1 ARID5A LOC100516606 NOL10 USO1 CDK8 STK24 PSPC1 RAN EWSR1 PES1 SMARCB1 URB2 EXOSC1 CUTC NOLC1 APTX WDR82 XPC NEPRO PHF8 NAA10 DKC1 TIMM44 SMARCA4 AKAP8 UTP15 TBCA TCOF1 RPS3 DTL GTF3C3 SPATS2L MYO10 NPM1…
4.16646e-05	106	603	1.6117	Regulation of catabolic process	http://amigo.geneontology.org/amigo/term/GO:0009894	EP300 ABCD2 GPLD1 TFEB HSP90AB1 ZC3H14 HSP90AA1 DHX34 PARK7 PABPC4 MTCL1 PNLDC1 SNX3 EXOSC3 TRIM32 RIDA SDCBP ATF6 ELAPOR1 DDRGK1 ERCC4 PKD1 LRPPRC PUM2 CLU PGAM1 BAG3 SAMD4B HNRNPU VIM PIP4K2A ABHD5 RAB7A OGT SLC25A5 AIFM1 GPC3 DKC1 RELA DDB1 PRR5L EIF4G2 SGTA ELAVL1 VDAC1 DCPS MDM4 ANGEL2 DTL C4BPB FASTKD2 SERPINE2 PSMD1 HTR2B ZC3HAV1 RNF180 NPM1 CHMP6 SUMO2 AXIN2 GFAP MEIOC PSME3 STAT3 ORMDL3 …
4.75146e-05	30	105	2.61956	Negative regulation of supramolecular fiber organization	http://amigo.geneontology.org/amigo/term/GO:1902904	WASF2 TMOD2 TJP1 PFDN2 TMOD4 DNAI3 DLC1 PFDN4 EMILIN1 SLIT2 CLU HIP1R PAK2 ARHGAP6 SWAP70 ARAP1 LMOD2 TAOK1 PHLDB2 CARMIL2 STMN1 GMFB SSH3 CAPZA2 CGNL1 CRYAB WAS GSN PFDN1 CAV3
4.89064e-05	58	274	1.94077	Ribosome	http://amigo.geneontology.org/amigo/term/GO:0005840	RPS18 RPS19 RPS11 RPL22 RPS8 RPL4 RPLP1 RPS6 MRPS2 RPL30 RPS3A RPL21 MRPL43 RPL24 MRPL39 RPLP2 MRPL11 MRPL49 RPS28 MRPL4 RPL18A RPL27A MRPL48 RPS3 NPM1 RPL19 RPS21 RPS27L RPL11 RPL13 RPL27 ATM IL20RB RPL18 RPS17 RPL29 RPL26 MTG1 RPS9 RPS7 MRPS14 RPL7 MRPL12 RPS15 RPS2 RPL35 RPL17 RPL23A RPL36A RPS15A RPL32 RPL10 RPS25 RPL15 RPL23 RPL28 RPS24 RPL3
5.01103e-05	164	1038	1.44858	Positive regulation of cell communication	http://amigo.geneontology.org/amigo/term/GO:0010647	EP300 ACVRL1 TESPA1 USP15 RIPK1 TRIM15 ITPR3 DAAM2 HSP90AB1 MBIP AKAP5 LGMN CDH13 LSM14A PIK3CD CEP192 GAREM1 MAPRE2 CTH SMOC2 MAP3K4 CITED2 CCN2 RNF165 TMOD2 CCBE1 BMP4 JAK2 TRIM32 RSPO2 SULF1 CRH SDCBP ATF6 CCN1 FERMT1 TFR2 STX1A TEDC2 IL1R1 SEMA4C PUM2 GEN1 ATP6V1C2 SPRY2 ARHGEF7 SEMA4D HIP1R SPPL3 MN1 SMARCB1 KLHL22 RASGEF1A DKK1 CTBP2 JCAD KIF5B ACP3 RYK EIF2A SKIL NLGN1 PAK2 HCLS1 NEPRO GPC…
5.18196e-05	169	1077	1.43869	Negative regulation of response to stimulus	http://amigo.geneontology.org/amigo/term/GO:0048585	PTPRO YBX3 PARPBP DYRK2 RIPK1 RUNX2 PKHD1 ARG2 CCDC88C RIN3 LGMN GSC AMFR ARHGAP35 RUVBL2 IL4I1 NR1H2 PARK7 DRAXIN CTH LEPROT TXNDC12 NCOA7 NT5E CD109 LRFN5 BMP4 ANXA1 TRIM32 EGFL7 SULF1 CD84 LMNA DLC1 FERMT1 DDRGK1 RBL1 YWHAB NCOA5 ERCC4 CRIM1 EMILIN1 SLIT2 SPRY2 CLU NCOR2 UFD1 SAMD8 DKK1 PRKG1 HIF1AN PIP4K2A RAB7A RYK WWTR1 MECOM SKIL HRG GPRASP1 SLC25A5 IGSF1 GPC3 RELA TKFC CTNND1 DKK3 SGTA SM…
5.77892e-05	59	282	1.91822	Huntington disease	http://www.genome.jp/kegg-bin/show_pathway?ssc05016	EP300 TUBA1A ATP5F1B TUBB SIN3A ATG2B COX6B DHDH HDAC2 ATP5F1A PSMC6 PSMD4 PLCB4 STX1A UQCRC2 COX5B LOC100516606 DNAH10 SAMD8 ACTR1A NDUFB6 KIF5B UQCRC1 SLC25A5 KLC2 RAPSN MAP2K7 VDAC1 NDUFA2 PSMC2 PSMD1 NDUFS6 ATP5MC1 SDHA DCTN4 NDUFV3 TBPL1 CLTC TGM2 NDUFS7 COX5A DNAI2 TAF4 PSMB1 LOC100624067 NDUFB4 CYC1 NDUFS3 ATP5PD SLC25A6 GPX1 ATP5F1C ATP5F1D PSMD9 ATP5PB NDUFA5 ADRM1 PSMC4 SOD2
6.03481e-05	51	231	2.02421	Negative regulation of organelle organization	http://amigo.geneontology.org/amigo/term/GO:0010639	MDM1 MAK WASF2 OMA1 TTK TMOD2 TJP1 BMP4 MTBP TERF1 LMNA TMOD4 DNAI3 DLC1 ERCC4 GEN1 SLIT2 HIP1R HNRNPU MCM2 PAK2 ARHGAP6 SLC25A5 NAA10 SWAP70 ANAPC15 ARAP1 TPR LMOD2 RAD1 NPM1 ZNF207 TAOK1 PHF23 PHLDB2 CARMIL2 TRIM37 H3F3B VAT1 STMN1 GMFB SSH3 ZWINT CAPZA2 YAP1 GPX1 CGNL1 WAS GSN RBM4 CAV3
6.33178e-05	22	65	3.10317	U2-type spliceosomal complex	http://amigo.geneontology.org/amigo/term/GO:0005684	SNRPC SF3A3 CDC40 SNRPA1 LSM7 CWC15 SF3B1 CWC27 EFTUD2 GCFC2 LSM8 SNW1 SRRM2 SNRPE SNRPG RBM8A SNRPD2 U2AF2 PHF5A CRNKL1 LSM2 MFAP1
6.33178e-05	70	356	1.80279	Regulation of cytoskeleton organization	http://amigo.geneontology.org/amigo/term/GO:0051493	MDM1 BICD1 CFL2 ARHGAP35 GRHL3 WASF2 CCN2 TMOD2 TJP1 VPS4B PFDN2 TMOD4 RHOC DNAI3 DLC1 ARPC1B PKD1 SLIT2 SLAIN2 HIP1R ARPC3 DRG1 ACTN2 HNRNPU ARPC4 HRG PAK2 HCLS1 ARHGAP6 SWAP70 ARAP1 RPS3 CEP295 AKAP9 ARPC5 TPR ACTR3 LMOD2 NPM1 BAIAP2 GRB2 TAOK1 RHOA PHLDB2 ARHGEF5 CLTC CARMIL2 CHMP1A TRIM37 TRAF3IP1 IL20RB STMN1 GMFB CAMSAP2 SSH3 CAPZA2 MAPRE3 BAG4 MECP2 CGNL1 RAC1 VASP WDR1 CLN3 WAS GSN ALMS1 …
6.42674e-05	139	853	1.49404	Negative regulation of signal transduction	http://amigo.geneontology.org/amigo/term/GO:0009968	PTPRO YBX3 DYRK2 RIPK1 RUNX2 PKHD1 CCDC88C LGMN GSC AMFR ARHGAP35 RUVBL2 PARK7 DRAXIN CTH LEPROT TXNDC12 CD109 BMP4 TRIM32 EGFL7 SULF1 LMNA DLC1 FERMT1 DDRGK1 YWHAB NCOA5 CRIM1 EMILIN1 SLIT2 SPRY2 CLU NCOR2 UFD1 SAMD8 DKK1 HIF1AN PIP4K2A RAB7A WWTR1 MECOM SKIL HRG GPRASP1 SLC25A5 IGSF1 GPC3 RELA TKFC CTNND1 DKK3 SMARCA4 ICAM1 PRDX2 CALR NANOS3 RGS14 CRHBP FBN2 FNIP1 CAVIN3 CBL UBASH3B SNX25 ADGRA…
6.42674e-05	43	182	2.16618	Regulation of actin filament organization	http://amigo.geneontology.org/amigo/term/GO:0110053	CFL2 ARHGAP35 WASF2 CCN2 TMOD2 TJP1 TMOD4 RHOC DNAI3 DLC1 ARPC1B SLIT2 HIP1R ARPC3 ACTN2 ARPC4 PAK2 HCLS1 ARHGAP6 SWAP70 ARAP1 ARPC5 ACTR3 LMOD2 GRB2 RHOA PHLDB2 ARHGEF5 CARMIL2 IL20RB STMN1 GMFB SSH3 CAPZA2 BAG4 CGNL1 RAC1 VASP WDR1 WAS GSN ALMS1 PPM1E
6.47257e-05	72	370	1.78413	Transcription factor binding	http://amigo.geneontology.org/amigo/term/GO:0008134	EP300 RARG JARID2 RUNX2 SIN3A PPP1R13B E2F4 CEBPA IRF2BP1 RUVBL2 NR1H2 PARK7 TAF4B HDAC2 TCF12 YWHAZ CREG1 HDGF GTF2B RBL1 ACTB ERCC4 ARID5A ATOH8 NAAA YWHAH SMARCB1 HIF1AN CTBP2 HNRNPU TADA3 CAND2 YEATS2 PAXBP1 MED12 RELA GTF2H1 SMARCA4 CALR PKN1 AKAP8 BRD8 RPS3 CENPF ISL1 NPM1 STAT3 TAF13 NRIP1 WBP2 MDFIC NUCKS1 SNW1 CTCF TAF4 DLL1 DR1 THRAP3 FBL YAP1 DDX5 PURB FLNA BPTF TAF6 RBX1 MECP2 C1QBP F…
6.64732e-05	58	277	1.91975	Actin binding	http://amigo.geneontology.org/amigo/term/GO:0003779	PARVB MYO1A DAAM2 CFL2 WASF2 EPB41 CAP1 EPB41L3 EPB41L2 MYO1E RUSC1 TMOD4 CNN3 FERMT1 TNNC2 ARPC1B CTNNA2 ANTXR1 FHDC1 HIP1R ARPC3 CORO1C YWHAH ACTN2 ABLIM1 HNRNPU NEBL MYRIP FLNB ARPC4 HCLS1 TMSB4 TMSB15B PLS3 CFL1 TPM4 PKNOX2 ARPC5 ACTR3 FMNL2 CALD1 LMOD2 DBNL COBLL1 GMFB SSH3 CAPZA2 AIF1 TNNI2 FLNA VASP WAS BLOC1S6 GSN MARCKS MYL2 LASP1 TNNI3
6.72761e-05	164	1044	1.44026	Positive regulation of signaling	http://amigo.geneontology.org/amigo/term/GO:0023056	EP300 ACVRL1 TESPA1 USP15 RIPK1 TRIM15 ITPR3 DAAM2 HSP90AB1 MBIP AKAP5 LGMN CDH13 LSM14A PIK3CD CEP192 GAREM1 MAPRE2 CTH SMOC2 MAP3K4 CITED2 CCN2 RNF165 TMOD2 CCBE1 BMP4 JAK2 TRIM32 RSPO2 SULF1 CRH SDCBP ATF6 CCN1 FERMT1 TFR2 STX1A TEDC2 IL1R1 SEMA4C PUM2 GEN1 ATP6V1C2 SPRY2 ARHGEF7 SEMA4D HIP1R SPPL3 MN1 SMARCB1 KLHL22 RASGEF1A DKK1 CTBP2 JCAD KIF5B ACP3 RYK EIF2A SKIL NLGN1 PAK2 HCLS1 NEPRO GPC…
7.23514e-05	159	1007	1.44765	Negative regulation of biosynthetic process	http://amigo.geneontology.org/amigo/term/GO:0009890	XRCC6 EP300 ACVRL1 RARG SARNP YBX3 PPHLN1 JARID2 CDKN1A RUNX2 SIN3A GSC THAP11 CEBPA LSM14A ZBTB32 IRF2BP1 ATF5 NR1H2 CC2D1B PNLDC1 ZBTB2 CITED2 HDAC2 COPS2 CAPN3 NDN BMP4 EXOSC3 ZHX1 TRPS1 RIDA PEX2 TERF1 HDGF PBXIP1 RBL1 MAFK ZC3H8 ARID5A ATOH8 EMILIN1 YWHAQ DACH1 PSPC1 SEMA4D NCOR2 DKK1 HIF1AN BAG3 SAMD4B CTBP2 HNRNPU SUV39H2 SATB1 NR2C2 WWTR1 MECOM SKIL YEATS2 HCLS1 MORC1 RBBP7 RELA PRDX5 RCO…
7.47258e-05	51	233	2.00683	Regulation of cellular component size	http://amigo.geneontology.org/amigo/term/GO:0032535	SIN3A CFL2 RIN3 E2F4 ARHGAP35 DRAXIN TMOD2 CRABP2 TMOD4 DNAI3 ARPC1B SLIT2 SEMA4D HIP1R ARPC3 ACTN2 ARPC4 RYK HCLS1 CDHR5 SWAP70 VAV1 CDHR2 CLNS1A ARPC5 ACTR3 ALS2 LMOD2 NPM1 GRB2 SLC9A3R1 NTN1 RHOA CARMIL2 IL20RB POU4F2 GMFB SSH3 CAPZA2 ATP13A2 SLC12A7 BAG4 RAP1GAP2 RAC1 VASP WDR1 CLN3 WAS GSN RAB5A CAV3
7.71752e-05	21	61	3.15636	Unfolded protein binding	http://amigo.geneontology.org/amigo/term/GO:0051082	HSP90AB1 HSP90AA1 DNAJA2 TCP1 SCG5 CLPX PFDN2 CCT3 PFDN4 TRAP1 CCT7 CCT4 CLU DNAJB11 CALR HSPA9 NPM1 SSUH2 HSPB6 CRYAB PFDN1
7.71752e-05	18	47	3.51133	PW:0000639 insulin responsive facilitative sugar transporter mediated glucose transport pathway	ftp://ftp.rgd.mcw.edu/pub/data_release	RAB14 YWHAZ YWHAB ARPC1B YWHAQ YWHAH SORBS1 KIF5B ARPC4 DENND1C CBL ACTR3 PPP1R3A BAIAP2 INS RAC1 RAB5A AKT1
8.91213e-05	243	1671	1.3333	Intracellular signal transduction	http://amigo.geneontology.org/amigo/term/GO:0035556	EP300 USP15 TMEM19 YBX3 DYRK2 RIPK1 TRIM15 CDKN1A HSP90AB1 PKHD1 MBIP AKAP5 SIPA1L1 CCDC88C PPP1R13B FBXO9 CDT1 FBXO31 CDH13 LSM14A ARHGAP35 PARK7 PIK3CD PDPN WASF2 RPA2 CEP192 SS18 GAREM1 MAPRE2 CTH DOCK7 TXNDC12 MAP3K4 ADGRG6 CCN2 TTK CAPN3 UACA BMP4 RPS6 JAK2 TRIM32 YWHAZ COPS5 SDCBP CASQ1 CRNN MAGI3 RHOC CCN1 DLC1 POLB PLCB4 DDRGK1 NEURL2 ARFGEF2 SEMA4C MAP4K3 EMILIN1 PUM2 GEN1 YWHAQ DCDC2C S…
9.58501e-05	151	951	1.45577	Negative regulation of cellular macromolecule biosynthetic process	http://amigo.geneontology.org/amigo/term/GO:2000113	XRCC6 EP300 ACVRL1 RARG SARNP YBX3 PPHLN1 JARID2 CDKN1A RUNX2 SIN3A GSC THAP11 CEBPA LSM14A ZBTB32 IRF2BP1 ATF5 NR1H2 CC2D1B PNLDC1 ZBTB2 CITED2 HDAC2 COPS2 CAPN3 NDN BMP4 EXOSC3 ZHX1 TRPS1 RIDA PEX2 TERF1 HDGF PBXIP1 RBL1 MAFK ZC3H8 ARID5A ATOH8 YWHAQ DACH1 PSPC1 SEMA4D NCOR2 DKK1 HIF1AN BAG3 SAMD4B CTBP2 HNRNPU SUV39H2 SATB1 NR2C2 WWTR1 MECOM SKIL YEATS2 HCLS1 MORC1 RBBP7 RELA PRDX5 RCOR2 SMARC…
9.74515e-05	152	959	1.45319	Negative regulation of macromolecule biosynthetic process	http://amigo.geneontology.org/amigo/term/GO:0010558	XRCC6 EP300 ACVRL1 RARG SARNP YBX3 PPHLN1 JARID2 CDKN1A RUNX2 SIN3A GSC THAP11 CEBPA LSM14A ZBTB32 IRF2BP1 ATF5 NR1H2 CC2D1B PNLDC1 ZBTB2 CITED2 HDAC2 COPS2 CAPN3 NDN BMP4 EXOSC3 ZHX1 TRPS1 RIDA PEX2 TERF1 HDGF PBXIP1 RBL1 MAFK ZC3H8 ARID5A ATOH8 YWHAQ DACH1 PSPC1 SEMA4D NCOR2 DKK1 HIF1AN BAG3 SAMD4B CTBP2 HNRNPU SUV39H2 SATB1 NR2C2 WWTR1 MECOM SKIL YEATS2 HCLS1 MORC1 RBBP7 RELA PRDX5 RCOR2 SMARC…
0.000101339	16	39	3.76142	Nucleoid	http://amigo.geneontology.org/amigo/term/GO:0009295	POLG CLPX TUFM LRPPRC DNA2 SAMD8 HSD17B10 SLC25A5 VDAC1 HSPA9 MTERF1 FASTKD2 SSBP1 LRRC59 TWNK SHMT2
0.000101339	16	39	3.76142	Mitochondrial nucleoid	http://amigo.geneontology.org/amigo/term/GO:0042645	POLG CLPX TUFM LRPPRC DNA2 SAMD8 HSD17B10 SLC25A5 VDAC1 HSPA9 MTERF1 FASTKD2 SSBP1 LRRC59 TWNK SHMT2
0.000103242	22	67	3.01054	Catalytic step 2 spliceosome	http://amigo.geneontology.org/amigo/term/GO:0071013	PRPF4B SF3A3 CDC40 SNRPA1 ZCCHC8 HNRNPU RBMX CWC15 SF3B1 CWC27 EFTUD2 SRSF1 HNRNPK SNW1 SRRM2 SNRPE SNRPG RBM8A DDX5 SNRPD2 CRNKL1 LSM2
0.000106021	44	192	2.10111	Diabetic cardiomyopathy	http://www.genome.jp/kegg-bin/show_pathway?ssc05415	ATP5F1B COX6B PIK3CD ATP5F1A PLCB4 UQCRC2 COX5B GFPT1 LOC100516606 PPP1CB RYR2 SAMD8 NDUFB6 UQCRC1 SLC25A5 PPP1CA RELA VDAC1 NDUFA2 CAMK2A GSR NDUFS6 ATP5MC1 SDHA NDUFV3 SLC2A1 NDUFS7 COX5A G6PD PDHB LOC100624067 NDUFB4 CYC1 NDUFS3 ATP5PD SLC25A6 INS ATP5F1C RAC1 ATP5F1D ATP5PB NDUFA5 AKT1 TNNI3
0.000106021	197	1310	1.37877	Positive regulation of response to stimulus	http://amigo.geneontology.org/amigo/term/GO:0048584	XRCC6 EP300 ACVRL1 TESPA1 USP15 RIPK1 GPLD1 TRIM15 C2 DAAM2 HSP90AB1 SIN3A MBIP ARG2 LGMN HSP90AA1 CDH13 AP1G1 CEBPA LSM14A PIK3CD CEP192 GAREM1 MAPRE2 CTH SMOC2 MAP3K4 CITED2 CCN2 RNF165 TMOD2 CCBE1 BMP4 JAK2 ANXA1 EXOSC3 TRIM32 RSPO2 SULF1 SDCBP ATF6 CCN1 FERMT1 STX1A TEDC2 IL1R1 SEMA4C PUM2 GEN1 ATP6V1C2 SLIT2 SPRY2 TNFSF13B LAMP1 PSPC1 SEMA4D HIP1R SPPL3 MN1 SMARCB1 KLHL22 RASGEF1A DKK1 CTBP2…
0.000106465	158	1007	1.43855	Cell junction	http://amigo.geneontology.org/amigo/term/GO:0030054	PARVB PACSIN2 PTPRO ABHD17C CPLX3 AKAP5 GPHN CCDC88C PDPN FBLIM1 WASF2 EPB41 EPB41L3 MAPRE2 ADGRL2 EPB41L2 GJA10 MYO1E TJP1 LRFN5 JAK2 PGM5 YWHAZ COPS5 IGSF9 KIRREL1 BCAN MAGI3 SYPL2 DLC1 FERMT1 PLCB4 CASS4 ACTB STX1A NPHP1 SEMA4C CTNNA2 THSD1 TNFSF13B ARHGEF7 LAMP1 PPP2R2A CLU ACTN2 SYNPO2L LGI1 OPALIN INA CTBP2 JCAD GAD2 MYRIP BSN GRIP2 NLGN1 FXR1 PAK2 RPL24 IL1RAPL1 CDK16 UBA1 SLC9A6 SLITRK2 P…
0.000111252	41	174	2.16038	Mitochondrial matrix	http://amigo.geneontology.org/amigo/term/GO:0005759	POLG GLRX5 ETFB ACADM CLPX MRPS2 CASQ1 ACSS1 TUFM TRAP1 LRPPRC COQ5 DNA2 SAMD8 MRPL43 MRPL39 HSD17B10 SLC25A5 MRPL11 MRPL49 TIMM44 MRPL4 VDAC1 HSPA9 MRPL48 RPS3 MTERF1 PMPCB FASTKD2 SSBP1 MCCC2 LRRC59 MTG1 TWNK MRPS14 MRPL12 C1QBP SHMT2 CLPP SOD2 TYMS
0.00011196	38	156	2.23334	DNA-binding transcription factor binding	http://amigo.geneontology.org/amigo/term/GO:0140297	EP300 RARG RUNX2 NR1H2 PARK7 TAF4B HDAC2 TCF12 GTF2B ACTB ARID5A YWHAH SMARCB1 HIF1AN CTBP2 TADA3 MED12 RELA GTF2H1 SMARCA4 CALR PKN1 AKAP8 BRD8 ISL1 NPM1 NRIP1 WBP2 MDFIC SNW1 TAF4 DLL1 THRAP3 YAP1 DDX5 TAF6 ATF2 DDIT3
0.000116983	111	655	1.55374	Supramolecular complex	http://amigo.geneontology.org/amigo/term/GO:0099080	CKAP4 TUBA1A KRT84 MYO1A NUP107 BICD1 DEK TUBB SIN3A CFL2 GAS8 CENPT LSM14A NUDC PABPC4 TCP1 TTK IVD RPS6 PGM5 ANXA1 TRIM32 MTBP CSPP1 CCT3 LMNA TMOD4 COL11A1 POLB TNNC2 ACTB CCT7 CCT4 LRPPRC PUM2 SLAIN2 FHDC1 HSPH1 SPRY2 DYNLL1 MYO18B RYR2 ACTN2 ACTA2 INA BAG3 HNRNPU KIF5B VIM NEBL FXR1 NFKBIZ CENPI KHSRP ELAVL1 NANOS3 SQSTM1 LMNB1 FBN2 CEP295 VPS11 PSMC2 TPR CENPF FASTKD2 BARD1 CUL3 COL4A4 LMOD…
0.000131664	57	277	1.88665	Regulation of mitotic cell cycle	http://amigo.geneontology.org/amigo/term/GO:0007346	CDKN1A SIN3A LGMN FBXO31 RCC2 RPA2 SMOC2 TTK INO80 VPS4B BMP4 ANXA1 MTBP SDCBP UBE2C PKD1 GEN1 CUL4A TTC28 BRINP3 HNRNPU XPC TPRA1 CCNB3 LRP5 DDB1 ANAPC15 ASNS TPR CENPF ANGEL2 DTL CUL3 SLC9A3R1 MEIOC AATF ZNF207 TAOK1 RPS27L MEPCE CDK4 ZWINT CD28 RPL26 PTPN11 CTDSP2 DACT1 AIF1 INS FOXG1 MECP2 FGF8 DBF4B ATF2 KANK2 THAP1 ZNF830
0.000139684	33	128	2.36374	DOID:9002762 Ovarian Neoplasms	ftp://ftp.rgd.mcw.edu/pub/data_release	CDKN1A VEGFA POP4 HDAC2 FANCM BNC2 SULF1 SELENBP1 DLC1 MECOM MAP2K7 SMARCA4 DNMT1 MCPH1 BARD1 IL6ST PHB MAP2K4 ERBB3 MSH6 BRIP1 PDGFRB ATM URI1 LRRC59 YAP1 CADM1 XRCC2 BCL2L1 JMJD6 FGF8 SRSF10 AKT1
0.000142133	215	1459	1.35108	Transcription by RNA polymerase II	http://amigo.geneontology.org/amigo/term/GO:0006366	XRCC6 EP300 DDX17 ACVRL1 RARG SARNP YBX3 RIPK1 JARID2 TFEB RUNX2 SIN3A NRL GSC CDH13 THAP11 E2F4 CEBPA ZBTB32 IRF2BP1 HIF3A RUVBL2 IL4I1 ATF5 NR1H2 PARK7 GRHL3 SS18 CC2D1B ZBTB2 CITED2 NCOA7 CCNC HDAC2 ICE2 TCF12 LEO1 RPAP1 INO80 NDN BMP4 ZHX1 TRPS1 PEX2 COPS5 RXRG ATF6 HDGF GLMP RPAP2 GTF2B CCN1 DDRGK1 RBL1 MAFK TFR2 GTF2I PKD1 ELOB ZC3H8 ARID5A ATOH8 MAML3 DACH1 SEMA4D ZNF395 NCOR2 SMARCB1 ECD …
0.00014916	40	170	2.15729	Molecular adaptor activity	http://amigo.geneontology.org/amigo/term/GO:0060090	SUN2 BICD1 AMFR RUVBL2 CAPN3 CNTLN MAGI3 STX1A SLC9A3R2 HIP1R NOLC1 ARPC4 GRIP2 DDB1 STX3 RAPSN STAP2 TCOF1 LAMTOR1 AKAP9 CHCHD3 BNIP1 BAIAP2 GRB2 SLC9A3R1 WWC2 KHDRBS1 OPTN ISCU DVL2 IL20RB RACK1 PTPN11 MAGI2 SASH1 JCHAIN TSNARE1 CBX5 CAV3 HERPUD1
0.000156889	29	106	2.50835	Protein folding	http://amigo.geneontology.org/amigo/term/GO:0006457	HSP90AB1 HSP90AA1 DNAJA2 PDCD5 TCP1 CLPX PFDN2 CCT3 PFDN4 TRAP1 CCT7 CCT4 HSPH1 CLU PPIL2 DNAJB11 CALR TBCA HSPA9 CHORDC1 DNAJC10 HSPE1 CWC27 SDF2 MESD HSPB6 SLC2A1 PDCL3 PFDN1
0.000161271	149	946	1.44408	Positive regulation of signal transduction	http://amigo.geneontology.org/amigo/term/GO:0009967	EP300 ACVRL1 TESPA1 USP15 RIPK1 TRIM15 DAAM2 HSP90AB1 MBIP CDH13 LSM14A PIK3CD CEP192 GAREM1 MAPRE2 CTH SMOC2 MAP3K4 CITED2 CCN2 RNF165 TMOD2 CCBE1 BMP4 JAK2 TRIM32 RSPO2 SULF1 SDCBP ATF6 CCN1 FERMT1 STX1A TEDC2 IL1R1 SEMA4C PUM2 GEN1 ATP6V1C2 SPRY2 SEMA4D HIP1R SPPL3 MN1 SMARCB1 KLHL22 RASGEF1A DKK1 CTBP2 JCAD ACP3 RYK EIF2A SKIL NLGN1 PAK2 HCLS1 NEPRO GPC3 IRF7 PPP1CA RELA PRR5L C3 MAP2K7 SMARC…
0.000161271	155	992	1.43257	Negative regulation of cellular biosynthetic process	http://amigo.geneontology.org/amigo/term/GO:0031327	XRCC6 EP300 ACVRL1 RARG SARNP YBX3 PPHLN1 JARID2 CDKN1A RUNX2 SIN3A GSC THAP11 CEBPA LSM14A ZBTB32 IRF2BP1 ATF5 NR1H2 CC2D1B PNLDC1 ZBTB2 CITED2 HDAC2 COPS2 CAPN3 NDN BMP4 EXOSC3 ZHX1 TRPS1 RIDA PEX2 TERF1 HDGF PBXIP1 RBL1 MAFK ZC3H8 ARID5A ATOH8 YWHAQ DACH1 PSPC1 SEMA4D NCOR2 DKK1 HIF1AN BAG3 SAMD4B CTBP2 HNRNPU SUV39H2 SATB1 NR2C2 WWTR1 MECOM SKIL YEATS2 HCLS1 MORC1 RBBP7 RELA PRDX5 RCOR2 SMARC…
0.000161271	57	279	1.87313	Regulation of protein-containing complex assembly	http://amigo.geneontology.org/amigo/term/GO:0043254	EP300 HSP90AA1 NR1H2 PARK7 FBLIM1 TMOD2 TERF1 TMOD4 RHOC DNAI3 FERMT1 ARPC1B STX1A SLIT2 SLAIN2 CLU HIP1R ARPC3 DRG1 SAMD8 DKK1 ARPC4 HRG HCLS1 FNIP1 RPS3 MMP1 AKAP9 ARPC5 ACTR3 NRG1 LMOD2 GRB2 RHOA TIRAP ARHGEF5 CARMIL2 H3F3B TRAF3IP1 IL20RB STMN1 GMFB CAMSAP2 SSH3 CAPZA2 MAPRE3 RACK1 PTPN11 DACT1 PMEPA1 BAG4 MECP2 RAC1 VASP CRYAB WAS GSN
0.000164336	128	787	1.49119	Protein dimerization activity	http://amigo.geneontology.org/amigo/term/GO:0046983	PTPRO ABCD2 RIPK1 H1-3 SNRPC TFEB HSP90AB1 NPAS3 HSP90AA1 CDH13 CENPT E2F4 HIF3A SAE1 RUVBL2 ACOT7 PARK7 TAF4B MTHFD1L TCF12 VPS4B CLPX CARNMT1 POLE3 ZHX1 TERF1 SDCBP ATF6 PGLYRP4 DCLRE1B DPYD VAPB PSPH ATOH8 ABCG8 DPY30 GEN1 SLIT2 MTTP HPGDS ABCG2 RAN HIP1R SPPL3 YWHAH PSAP IDE HIF1AN NOLC1 EBF3 PIP4K2A ACP3 UBA5 WWTR1 FXR1 QTRT2 USF3 PGRMC1 AIFM1 RELA TRMT112 ELAVL1 CAMK2A TCOF1 TMEM9B FZD4 CAC…
0.000171196	13	28	4.25679	COP9 signalosome	http://amigo.geneontology.org/amigo/term/GO:0008180	COPS7A HSP90AB1 DOCK7 EPB41L2 ATP5F1A COPS2 COPS5 DYNLL1 GRB2 COPS3 FLOT1 THEMIS STOML2
0.000179124	129	796	1.48584	DOID:630 genetic disease	ftp://ftp.rgd.mcw.edu/pub/data_release	EP300 MYBPC1 COL11A2 MEA1 PKHD1 POLG SIN3A AP4S1 SLC12A6 VRK1 GPT2 CEBPA ETFB GRHL3 DOCK7 PARS2 ARID1B RARS2 FBXL4 HDAC2 SETBP1 MYO1E TCF12 RAD51 LINS1 LRFN5 TPM2 EXOSC3 KCNQ3 TRPS1 LMNA COL11A1 DPYD ABCA4 EEF1D PLCB4 PANK2 EDN3 ACTB PSPH XYLT1 PKD1 EDAR SPAST EMILIN1 GAREM2 SLIT2 ETFDH NAA15 AUH MN1 SMARCB1 RYR2 MTR PSAP CEP55 LGI1 BAG3 EBF3 HNRNPU STAG1 EIF2B5 ARHGAP6 HSD17B10 PHF8 MED12 OGT PC…
0.000186632	98	567	1.58467	Protein localization to organelle	http://amigo.geneontology.org/amigo/term/GO:0033365	PACSIN2 SUN2 BICD1 PPHLN1 CDKN1A ABHD17C SIN3A IPO4 HSP90AA1 GAS8 PDCD5 KDELR1 RUVBL2 PARK7 RCC2 RPA2 CEP192 ANKRD13C TCP1 TTK BMP4 CNTLN MTBP PEX2 TERF1 CCT3 GLMP LMNA FERMT1 DDRGK1 NSFL1C IFT140 GCC2 CCT7 CCT4 PEX13 LAMP1 RAN ANKRD13A RYR2 HK1 LGI1 BAG3 HNRNPU CHCHD4 RAB7A WWTR1 HCLS1 AIFM1 DKC1 POLA2 SGTA TIMM44 ELAVL1 TIMM29 CALR SRPRA PMPCB TPR MCPH1 BARD1 AGK NPM1 SRP68 STAT3 ORMDL3 CEP250 …
0.000188189	56	274	1.87385	Generation of precursor metabolites and energy	http://amigo.geneontology.org/amigo/term/GO:0006091	EP300 DYRK2 CYP1A2 DLST GPI ETFB PARK7 PGD ACADM ATP5F1A PANK2 TRAP1 PPP1CB ETFDH HK1 IDE PGAM1 NDUFB6 UQCRC1 OGT TALDO1 PGLS CAVIN3 OXCT1 IL6ST NDUFS6 ACOX1 GALK1 CYB561 STAT3 SDHA RHOA EIF6 CYB5R4 ISCU SLC2A6 COX5A G6PD COQ9 MDH1 HMGCL FH EPM2AIP1 NDUFS3 IDH3A ALDOA INS ATP5F1C H6PD ATP5F1D SHMT2 ATP5PB NDUFA5 NKX1-1 VGF STOML2
0.000196982	258	1813	1.30472	Cellular response to chemical stimulus	http://amigo.geneontology.org/amigo/term/GO:0070887	EP300 DDX17 TUBA1A ACVRL1 RARG USP15 PTPRO YBX3 IL17REL RIPK1 JARID2 GPLD1 SRSF3 HSP90AB1 RUNX2 SIN3A CYP1A2 SLC12A6 RIN3 LGMN AMFR PDCD5 CEBPA LSM14A RUVBL2 PARK7 PIK3CD GAREM1 CTH LEPROT SMOC2 CITED2 CCN2 NCOA7 CD109 RNF165 TPM1 CAPN3 RAD51 NDN CCBE1 BMP4 JAK2 ANXA1 TRIM32 RAB14 CA2 SULF1 COPS5 SDCBP RXRG ATF6 HDGF LMNA CRNN CCN1 FERMT1 DDRGK1 NCOA5 RTF2 VAPB ACTB TFR2 ARID5A IL1R1 SRSF7 CRIM1 …
0.000200425	77	418	1.68893	Apoptotic signaling pathway	http://amigo.geneontology.org/amigo/term/GO:0097190	EP300 YBX3 DYRK2 RIPK1 CDKN1A PPP1R13B PDCD5 PARK7 UBE4B CTH TXNDC12 UACA BMP4 TRIM32 LMNA POLB STK24 CLU HIP1R DIABLO ERP29 SAMD8 BLOC1S2 BAG3 SKIL PAK2 SLC25A5 AIFM1 PPP1CA RELA MADD ICAM1 PRDX2 NANOS3 RPS3 CTSC USP28 ACVR1 DNAJC10 ACKR3 STK25 SLC9A3R1 PSME3 AATF MSH6 UBQLN1 DAPK2 HNRNPK SNW1 RPS27L ATM SERPINE1 IL20RB URI1 ATP5IF1 CD28 RPL26 RACK1 XBP1 YAP1 NDUFS3 DDX5 PEA15 PLAUR TMEM161A GPX…
0.000205781	128	791	1.48364	Regulation of phosphorylation	http://amigo.geneontology.org/amigo/term/GO:0042325	XRCC6 EP300 ACVRL1 PTPRO RIPK1 CDKN1A HSP90AB1 CCDC88C HSP90AA1 PARK7 DOCK7 MAP3K4 PPP1R14C CD109 RAD51 BMP4 SDCBP DDR2 CCN1 DDRGK1 RBL1 CASS4 PKD1 SPDYA EMILIN1 SLIT2 SPRY2 SEMA4D CLU ERP29 DYNLL1 CORO1C DKK1 PGAM1 PRDX3 BCCIP HNRNPU PIP4K2A PRKAR2A TADA3 WWTR1 HRG PAK2 HCLS1 CCNB3 OGT SRPX2 CCNQ LRP5 DGKZ PRR5L C3 CDC37 PKN1 AKAP8 AKAP8L RGS14 FNIP1 RPS3 FZD4 CHORDC1 UBASH3B AKAP9 NIBAN1 MCPH1 …
0.000206626	22	70	2.88152	Translation regulator activity, nucleic acid binding	http://amigo.geneontology.org/amigo/term/GO:0090079	EIF3K EIF3I EEF1A1 EIF3J EIF3E EEF1D TUFM DENR EIF2A EIF2B5 EEF1G EIF3M EIF4G2 EIF4E1B ETF1 EEF1B2 RPS27L GFM1 EIF2S1 EIF5 EIF5A TYMS
0.000206705	252	1766	1.3083	Anatomical structure morphogenesis	http://amigo.geneontology.org/amigo/term/GO:0009653	PARVB PACSIN2 EP300 ACVRL1 RARG PTPRO ACRBP CECR2 TXNRD1 GPLD1 COL11A2 HSP90AB1 RUNX2 PKHD1 SIN3A HEXA CFL2 NRL MMP14 CCNB1IP1 SIPA1L1 CCDC88C GSC CDH13 E2F4 GPI ARHGAP35 PIK3CD DRAXIN PDPN RCC2 GRHL3 WASF2 EPB41 CAP1 SS18 DOCK7 OMA1 SMOC2 PNLDC1 MTHFD1L CITED2 CCN2 RIMS1 SPACA1 SOBP CD109 RNF165 TPM1 MYO1E LEO1 EPB42 CAPN3 NDN TJP1 SERPINB5 CCBE1 BMP4 RPS6 ANXA1 TNC RSPO2 YWHAZ SULF1 CASQ1 IGSF9…
0.000208621	144	913	1.44607	Positive regulation of molecular function	http://amigo.geneontology.org/amigo/term/GO:0044093	XRCC6 EP300 CNPY2 CRACR2A RIPK1 TRIM26 TRIM15 CDKN1A HSP90AB1 ARRDC4 AKAP5 AHSA1 LGMN HSP90AA1 AMFR PDCD5 NR1H2 PARK7 RCC2 GRHL3 EPB41 MAPRE2 CTH DOCK7 CDC20 MAP3K4 TCP1 HDAC2 CAPN3 LARP6 BMP4 TRIM32 EIF3E COPS5 DDR2 CASQ1 SPTA1 CRNN RHOC GTF2B CCN1 DLC1 DDRGK1 YWHAB CASS4 PKD1 ANTXR1 CCT4 SPDYA ELMOD2 ARHGEF7 SEMA4D CLU RAN HIP1R DIABLO SPPL3 CORO1C SMARCB1 RYR2 ACTN2 PSAP DKK1 IDE PRDX3 CTBP2 A…
0.000220461	144	914	1.44448	Positive regulation of protein metabolic process	http://amigo.geneontology.org/amigo/term/GO:0051247	XRCC6 ACVRL1 RIPK1 JARID2 GPLD1 PHF1 CDKN1A HSP90AB1 ARRDC4 LGMN HSP90AA1 PDCD5 SAE1 RUVBL2 NR1H2 PARK7 DOCK7 CDC20 MAP3K4 HDAC2 CAPN3 NDN CCBE1 LARP6 FANCM BMP4 TRIM32 EIF3E SDCBP DDR2 LMNA CCN1 DLC1 DDRGK1 CASS4 TFR2 PKD1 ANTXR1 SPDYA SPRY2 SEMA4D CLU HIP1R DIABLO ERP29 SPPL3 SART3 SMARCB1 DKK1 VIM RAB7A SENP2 PAK2 HCLS1 PAXBP1 OGT LOC100525798 AIFM1 GPC3 RELA DDB1 PRR5L SGTA C3 ELAVL1 DNMT1 AK…
0.000243748	101	593	1.56158	Negative regulation of cellular protein metabolic process	http://amigo.geneontology.org/amigo/term/GO:0032269	PTPRO JARID2 PHF1 CDKN1A HSP90AB1 SIN3A LSM14A NR1H2 PARK7 PNLDC1 NCOA7 CD109 CAPN3 BMP4 EXOSC3 RIDA SDCBP DDRGK1 YWHAB EMILIN1 SLIT2 SPRY2 SEMA4D CORO1C SMARCB1 DKK1 SAMD4B PRKAR2A WWTR1 SENP2 PAK2 OGT LRP5 RELA PRR5L PRMT3 SWAP70 SGTA DNMT1 CALR PKN1 SQSTM1 RGS14 FNIP1 RPS3 CHORDC1 UBASH3B DCPS NIBAN1 TPR MGAT5 SNX25 DNAJC10 TFPI SERPINE2 NPM1 CHMP6 TIMP2 STAT3 GGNBP2 GPS2 DCP1A EIF6 UCHL1 TARD…
0.000243748	28	103	2.4924	Negative regulation of cytoskeleton organization	http://amigo.geneontology.org/amigo/term/GO:0051494	MDM1 WASF2 TMOD2 TJP1 TMOD4 DNAI3 DLC1 SLIT2 HIP1R PAK2 ARHGAP6 SWAP70 ARAP1 LMOD2 NPM1 TAOK1 PHLDB2 CARMIL2 TRIM37 STMN1 GMFB SSH3 CAPZA2 CGNL1 WAS GSN RBM4 CAV3
0.000258323	147	940	1.43379	Intracellular vesicle	http://amigo.geneontology.org/amigo/term/GO:0097708	PACSIN2 MON2 BICD1 ACRBP SCAMP2 CPLX3 MMP14 ARRDC4 AKAP5 VIPAS39 RIN3 LGMN ATP2C2 AP1G1 IL4I1 PDPN RCC2 WASF2 LEPROT IGF2R TCP1 CLVS2 SNX14 SPACA1 SNX3 SPG21 MYO1E SCG5 VPS4B ANXA1 RAB14 COPS5 COPA RUSC1 SYPL2 ELAPOR1 SEC23B SNX21 ARFGEF2 TFR2 STX1A GP2 SEMA4C SPAST LAPTM4A MFSD10 THSD1 LAMP1 RAN HIP1R SPPL3 ANKRD13A CORO1C VPS26A PSAP SEC24C SAMD8 MYOF PRDX3 WDR11 KIF5B VIM MYRIP RAB7A DOP1B CDK…
0.000258323	46	212	1.98938	Intrinsic apoptotic signaling pathway	http://amigo.geneontology.org/amigo/term/GO:0097193	EP300 YBX3 DYRK2 CDKN1A PPP1R13B PARK7 TXNDC12 TRIM32 POLB STK24 CLU DIABLO ERP29 SAMD8 SKIL AIFM1 RPS3 USP28 DNAJC10 ACKR3 STK25 SLC9A3R1 MSH6 UBQLN1 DAPK2 HNRNPK SNW1 RPS27L ATM IL20RB URI1 RPL26 RACK1 XBP1 NDUFS3 DDX5 PLAUR TMEM161A GPX1 BCL2L1 SFPQ SIAH1 ERN2 HERPUD1 TPT1 DDIT3
0.000262538	52	251	1.89944	Prion disease	http://www.genome.jp/kegg-bin/show_pathway?ssc05020	TUBA1A ATP5F1B TUBB ITPR3 COX6B DHDH PIK3CD ATP5F1A PSMC6 PSMD4 UQCRC2 COX5B LOC100516606 RYR2 SAMD8 NDUFB6 KIF5B UQCRC1 SLC25A5 KLC2 RAPSN VDAC1 NDUFA2 PSMC2 LAMC1 PSMD1 NDUFS6 ATP5MC1 SDHA NDUFV3 NDUFS7 COX5A PSMB1 LOC100624067 GRIN3B NDUFB4 CYC1 NDUFS3 ATP5PD EIF2S1 SLC25A6 ATP5F1C RAC1 ATP5F1D PSMD9 ATP5PB NDUFA5 ATF2 ADRM1 PSMC4 CAV3 DDIT3
0.000265504	42	187	2.05923	Positive regulation of cellular protein localization	http://amigo.geneontology.org/amigo/term/GO:1903829	BICD1 HSP90AB1 ABHD17C AKAP5 GAS8 PDCD5 PARK7 EPB41 TCP1 EPB41L2 CCT3 DDRGK1 CCT7 CCT4 RAN BAG3 KIF5B WWTR1 HCLS1 DKC1 STX3 SQSTM1 TPR ACSL3 NPM1 ORMDL3 STAC2 ITGA3 CEP250 MESD TARDBP MEPCE ARHGEF16 RACK1 YAP1 FLNA INS LRIG2 CLN3 STOM TRIM28 CEMIP
0.000265504	80	443	1.6557	Pathways of neurodegeneration	http://www.genome.jp/kegg-bin/show_pathway?ssc05022	TUBA1A ATP5F1B TUBB ITPR3 ATG2B COX6B DHDH PARK7 ATP5F1A PSMC6 ATF6 PSMD4 PLCB4 VAPB STX1A UQCRC2 TRAP1 COX5B LOC100516606 DNAH10 RYR2 SAMD8 DKK1 FAS ACTR1A NDUFB6 KIF5B CALML5 UQCRC1 UBA1 HSD17B10 SLC25A5 LRP5 KLC2 RELA RAPSN MAP2K7 SQSTM1 VDAC1 NDUFA2 CAMK2A FZD4 PSMC2 ALS2 FZD5 PSMD1 NDUFS6 AXIN2 ATP5MC1 SDHA DCTN4 NDUFV3 UCHL1 TARDBP OPTN NDUFS7 COX5A DNAI2 DVL2 PSMB1 LOC100624067 XBP1 NDUFB4…
0.000265504	211	1443	1.34064	Cellular response to organic substance	http://amigo.geneontology.org/amigo/term/GO:0071310	EP300 DDX17 TUBA1A ACVRL1 RARG USP15 YBX3 IL17REL RIPK1 JARID2 GPLD1 SRSF3 HSP90AB1 RUNX2 SIN3A LGMN AMFR PDCD5 CEBPA LSM14A RUVBL2 PARK7 PIK3CD GAREM1 CTH LEPROT SMOC2 CITED2 CCN2 CD109 RNF165 RAD51 NDN CCBE1 BMP4 JAK2 ANXA1 TRIM32 RAB14 CA2 SULF1 COPS5 SDCBP RXRG ATF6 HDGF CRNN CCN1 FERMT1 DDRGK1 NCOA5 VAPB ACTB ARID5A IL1R1 SRSF7 CRIM1 EMILIN1 SLIT2 USO1 LRIT3 SPRY2 TNFSF13B CLU NCOR2 MN1 YWHA…
0.00026894	91	522	1.59833	Transferase complex	http://amigo.geneontology.org/amigo/term/GO:1990234	EP300 DYRK2 JARID2 PHF1 CDKN1A POLG ERH DLST FBXO9 FBXO31 RUVBL2 UBE4B TAF4B CDC20 HDAC2 LEO1 VIRMA PEX2 TCEA1 RPAP2 GTF2B SPTLC3 UBE2C ACTB ELOB DPY30 NAA15 CUL4A KLHL22 DNA2 BCCIP NAA35 PRKAR2A RBM15B WDR82 TADA3 RPN1 NAA50 RBBP7 OGT NAA10 POLA2 DDB1 GTF2H1 BRD8 ANAPC15 CLNS1A DLD KLHL20 CACYBP DTL ACVR1 BARD1 CUL3 MKLN1 ING3 ORMDL3 KMT2C SPOP TAF13 CDC16 UBE2V2 MAT2A SNW1 SNRPE TRIM37 DCAF12 T…
0.000276891	143	911	1.43918	Negative regulation of signaling	http://amigo.geneontology.org/amigo/term/GO:0023057	PTPRO YBX3 DYRK2 RIPK1 RUNX2 PKHD1 CCDC88C LGMN GSC AMFR ARHGAP35 RUVBL2 PARK7 DRAXIN CTH LEPROT TXNDC12 CD109 BMP4 TRIM32 EGFL7 SULF1 LMNA DLC1 FERMT1 DDRGK1 YWHAB NCOA5 CRIM1 EMILIN1 SLIT2 SPRY2 CLU NCOR2 UFD1 SAMD8 DKK1 HIF1AN PIP4K2A RAB7A WWTR1 MECOM SKIL HRG GPRASP1 SLC25A5 IGSF1 GPC3 RELA TKFC CTNND1 DKK3 SMARCA4 ICAM1 PRDX2 CALR NANOS3 RGS14 CRHBP FBN2 FNIP1 CAVIN3 CBL UBASH3B SNX25 ADGRA…
0.00028073	158	1027	1.41053	Vesicle	http://amigo.geneontology.org/amigo/term/GO:0031982	PACSIN2 MON2 BICD1 ACRBP PKHD1 SCAMP2 CPLX3 MMP14 ARRDC4 AKAP5 VIPAS39 RIN3 LGMN ATP2C2 AP1G1 IL4I1 PDPN RCC2 WASF2 LEPROT IGF2R TCP1 CLVS2 SNX14 SPACA1 SNX3 SPG21 MYO1E SCG5 VPS4B ANXA1 RAB14 COPS5 SDCBP COPA RUSC1 SYPL2 ELAPOR1 SEC23B SNX21 ARFGEF2 TFR2 STX1A GP2 PKD1 SEMA4C SPAST LAPTM4A MFSD10 THSD1 LAMP1 RAN HIP1R SPPL3 ANKRD13A CORO1C VPS26A PSAP SEC24C SAMD8 MYOF PRDX3 WDR11 KIF5B VIM MYRI…
0.000288961	50	239	1.91809	Establishment of protein localization to organelle	http://amigo.geneontology.org/amigo/term/GO:0072594	CDKN1A IPO4 HSP90AA1 PDCD5 RUVBL2 TCP1 BMP4 PEX2 TERF1 CCT3 LMNA FERMT1 GCC2 CCT7 CCT4 PEX13 LAMP1 RAN RYR2 HK1 BAG3 CHCHD4 RAB7A HCLS1 AIFM1 DKC1 POLA2 TIMM44 ELAVL1 TIMM29 SRPRA PMPCB TPR AGK SRP68 STAT3 TARDBP KPNA3 SRP19 ATP5IF1 SEC62 SSR3 MACROH2A2 HGS FLNA BAG4 ING1 TRIM28 HERPUD1 DDIT3
0.000301105	29	110	2.41714	Lamellipodium	http://amigo.geneontology.org/amigo/term/GO:0030027	PARVB PDPN WASF2 ACTB ANTXR1 ARHGEF7 ARPC3 CORO1C ABLIM1 MYLK STX3 DGKZ ARPC5 ACTR3 ALS2 DBNL RHOA CARMIL2 FLOT1 ILK ARHGAP31 SLC39A6 PALLD VAMP7 AIF1 RAC1 FAM89B VASP GSN
0.000301105	29	110	2.41714	Carbon metabolism	http://www.genome.jp/kegg-bin/show_pathway?ssc01200	DLST GPT2 GPI PGD PHGDH ACSS1 PSPH ACADS HK1 PGAM1 TALDO1 PC TKFC PGLS DLAT DLD ACOX1 G6PD MDH1 PDHB FH IDH3A ALDOA GOT2 H6PD CS SDS SHMT2 GCSH
0.000301346	51	246	1.90078	Regulation of actin filament-based process	http://amigo.geneontology.org/amigo/term/GO:0032970	CFL2 ARHGAP35 GRHL3 WASF2 CCN2 TMOD2 TJP1 TMOD4 RHOC DNAI3 DLC1 MYLK2 ARPC1B SLIT2 HIP1R ARPC3 RYR2 ACTN2 ARPC4 HRG PAK2 HCLS1 ARHGAP6 SWAP70 ARAP1 AKAP9 ARPC5 ACTR3 LMOD2 BAIAP2 GRB2 RHOA PHLDB2 ARHGEF5 TRPM4 CARMIL2 IL20RB STMN1 GMFB SSH3 CAPZA2 BAG4 CGNL1 RAC1 VASP WDR1 WAS GSN ALMS1 PPM1E CAV3
0.0003153	198	1344	1.35071	Organelle membrane	http://amigo.geneontology.org/amigo/term/GO:0031090	PACSIN2 SUN2 MON2 NUP107 ITPR3 TFEB SLC25A27 SCAMP2 CPLX3 ATP2C2 AP1G1 AMFR GPI YIF1B RCC2 ACADM OMA1 IGF2R SPACA1 SNX3 ATP5F1A TMEM87A VPS4B PEX2 ARMC1 SDCBP SPATA46 ATF6 COPA LMNA SPTLC3 SEC23B DDRGK1 SNX21 ARFGEF2 VAPB STX1A UQCRC2 XYLT1 TRAP1 SEMA4C PEX13 LOC100516606 SPAST PUM2 LAPTM4A MFSD10 ETFDH USO1 LAMP1 CLU COQ5 SPPL3 CORO1C SNAP29 UFD1 RYR2 CSGALNACT2 VPS26A SEC24C SAMD8 ARMH3 NDUFB6 …
0.0003153	25	88	2.60468	Translation regulator activity	http://amigo.geneontology.org/amigo/term/GO:0045182	EIF3K EIF3I EEF1A1 EIF3J EIF3E EEF1D TUFM DENR SAMD4B EIF2A EIF2B5 EEF1G EIF3M EIF4G2 EIF4E1B ETF1 EEF1B2 IGF2BP1 RPS27L GFM1 RPS9 EIF2S1 EIF5 EIF5A TYMS
0.000326003	98	576	1.55991	Negative regulation of programmed cell death	http://amigo.geneontology.org/amigo/term/GO:0043069	YBX3 AMIGO2 RIPK1 HSP90AB1 PKHD1 SIN3A ARG2 LGMN ATF5 PARK7 DRAXIN CTH TXNDC12 CITED2 CAPN3 BMP4 RPS6 TRIM32 COPS5 LMNA CCN1 NAA15 SPRY2 CLU HIP1R SAMD8 PRDX3 BAG3 MGMT NAA35 HIGD1A MECOM PAK2 HCLS1 SLC25A5 RELA PRDX5 DDB1 API5 ICAM1 DNMT1 PRDX2 NANOS3 FNIP1 VDAC1 CBL DCPS MDM4 ASNS KLHL20 ACVR1 GCG BARD1 HTR2B ACKR3 ISL1 NPM1 PSME3 ORMDL3 AATF TMIGD1 MAP2K4 ERBB3 RHOA HNRNPK FAIM SERPINE1 URI1 T…
0.000327713	20	62	2.95757	Translation factor activity, RNA binding	http://amigo.geneontology.org/amigo/term/GO:0008135	EIF3K EIF3I EEF1A1 EIF3J EIF3E EEF1D TUFM DENR EIF2A EIF2B5 EEF1G EIF3M EIF4G2 EIF4E1B ETF1 EEF1B2 GFM1 EIF2S1 EIF5 EIF5A
0.000327713	32	128	2.29212	RNA polymerase II-specific DNA-binding transcription factor binding	http://amigo.geneontology.org/amigo/term/GO:0061629	EP300 RARG NR1H2 PARK7 TAF4B HDAC2 GTF2B ACTB ARID5A YWHAH SMARCB1 HIF1AN CTBP2 TADA3 MED12 RELA GTF2H1 SMARCA4 CALR PKN1 AKAP8 BRD8 NPM1 NRIP1 WBP2 MDFIC SNW1 TAF4 DLL1 THRAP3 DDX5 TAF6
0.000327713	142	907	1.43542	Negative regulation of cell communication	http://amigo.geneontology.org/amigo/term/GO:0010648	PTPRO YBX3 DYRK2 RIPK1 RUNX2 PKHD1 CCDC88C LGMN GSC AMFR ARHGAP35 RUVBL2 PARK7 DRAXIN CTH LEPROT TXNDC12 CD109 BMP4 TRIM32 EGFL7 SULF1 LMNA DLC1 FERMT1 DDRGK1 YWHAB NCOA5 CRIM1 EMILIN1 SLIT2 SPRY2 CLU NCOR2 UFD1 SAMD8 DKK1 HIF1AN PIP4K2A RAB7A WWTR1 MECOM SKIL HRG GPRASP1 SLC25A5 IGSF1 GPC3 RELA TKFC CTNND1 DKK3 SMARCA4 ICAM1 PRDX2 CALR NANOS3 RGS14 CRHBP FBN2 FNIP1 CAVIN3 CBL UBASH3B SNX25 ADGRA…
0.000328568	146	938	1.42707	Cytoplasmic vesicle	http://amigo.geneontology.org/amigo/term/GO:0031410	PACSIN2 MON2 BICD1 ACRBP SCAMP2 CPLX3 MMP14 ARRDC4 AKAP5 VIPAS39 RIN3 LGMN ATP2C2 AP1G1 IL4I1 PDPN RCC2 WASF2 LEPROT IGF2R TCP1 CLVS2 SNX14 SPACA1 SNX3 SPG21 MYO1E SCG5 VPS4B ANXA1 RAB14 COPS5 COPA RUSC1 SYPL2 ELAPOR1 SEC23B SNX21 ARFGEF2 TFR2 STX1A GP2 SEMA4C SPAST LAPTM4A MFSD10 THSD1 LAMP1 RAN HIP1R SPPL3 ANKRD13A CORO1C VPS26A PSAP SEC24C SAMD8 MYOF PRDX3 WDR11 KIF5B VIM MYRIP RAB7A DOP1B CDK…
0.000328568	107	643	1.5257	Oxidoreductase activity	http://amigo.geneontology.org/amigo/term/GO:0016491	CYP2D25 TXNRD1 CYP1A2 GPHN GLRX5 NQO1 DHDH IL4I1 ETFB PARK7 PGD AKR7A2 ACADM MTHFD1L TXNL1 IVD TXN NDOR1 PHGDH DPYD HMOX2 COX5B SPR LOC100516606 TDO2 ETFDH HADH PRSS55 OGFOD2 ALDH2 ACADS TXNRD2 P4HA1 ENTPD1 HIF1AN PRDX3 CTBP2 OXNAD1 QRICH1 CHCHD4 HSD17B10 PHF8 AIFM1 PRDX5 LDHA PRDX2 PAM DLAT FMO4 DLD GSR DNAJC10 LOC100511166 AASS NNT ACOX1 FDXR CYB561 PIPOX ALDH3A2 ALDH3A1 SDHA BLVRB TPH2 ENOX1 P…
0.000328568	34	140	2.22663	Ligase activity	http://amigo.geneontology.org/amigo/term/GO:0016874	ATP5F1B ACSBG1 SAE1 PARS2 CTPS1 MTHFD1L RARS2 ATP5F1A EEF1D ACSS1 PAICS UBA6 DALRD3 UBA5 ATP6V1A UBA1 CARNS1 PC ACSBG2 FARSA SLC27A6 NARS2 ASNS ACSL3 MCCC2 ACACA UCHL1 KCNMB3 ATP5F1C ATP5F1D GCLM ATP5PB AARSD1 FARS2
0.000328568	143	915	1.43289	Cell projection organization	http://amigo.geneontology.org/amigo/term/GO:0030030	PARVB PACSIN2 EP300 MYO1A PTPRO CECR2 MAK HSP90AB1 PKHD1 SIN3A SIPA1L1 LGMN GAS8 CDH13 E2F4 CFAP20 ARHGAP35 DRAXIN PDPN RCC2 UBXN10 WASF2 DOCK7 RIMS1 RNF165 NDN TNC TRIM32 ODF2 TOX IGSF9 CRABP2 PHGDH IFT140 DPYSL5 SLIT2 UBA6 FHDC1 SPRY2 STK24 ARHGEF7 SEMA4D NEK1 CORO1C YWHAH SNAP29 ACTN2 PRKG1 LGI1 ABLIM1 VIM ARMC4 RYK WWTR1 NLGN1 HRG PAK2 MYLK RPL24 CDK16 SLC9A6 MCF2 SLITRK2 CDHR5 PRKCSH ICAM1 G…
0.000328568	102	606	1.54321	Cellular protein-containing complex assembly	http://amigo.geneontology.org/amigo/term/GO:0034622	TESPA1 NUP107 COPS7A SNRPF H1-3 SNRPC HSP90AB1 IPO4 HSP90AA1 CENPT SF3A3 CEP192 MDN1 TMOD2 RAD51 PSIP1 TERF1 CASQ1 TMOD4 GTF2B DNAI3 UBE2C ARPC1B STX1A SLIT2 SLAIN2 CLU HIP1R DENR ARPC3 SART3 DRG1 SNRPD3 HIRA SAMD8 NDUFB6 ARMC4 ARPC4 MCM2 HCLS1 RPL24 CHAF1B LOC100525798 CENPI AIFM1 CPSF7 CALR TBCA NDUFA2 COA4 RPS3 CLNS1A AKAP9 ARPC5 ACTR3 SF3B1 FASTKD2 LMOD2 NPM1 GRB2 SRSF1 GCFC2 CLTC CARMIL2 SNR…
0.000332156	104	621	1.53546	Negative regulation of cell death	http://amigo.geneontology.org/amigo/term/GO:0060548	YBX3 AMIGO2 RIPK1 HSP90AB1 PKHD1 SIN3A ARG2 LGMN ATF5 PARK7 DRAXIN CTH TXNDC12 CITED2 NCOA7 CAPN3 VPS4B BMP4 RPS6 TRIM32 COPS5 LMNA CCN1 NAA15 SPRY2 CLU HIP1R SAMD8 PRDX3 BAG3 MGMT NAA35 HIGD1A MECOM PAK2 HCLS1 SLC25A5 RELA PRDX5 DDB1 TMEM109 API5 ICAM1 DNMT1 PRDX2 NANOS3 FNIP1 VDAC1 CBL DCPS MDM4 ASNS KLHL20 ACVR1 GCG BARD1 HTR2B ACKR3 ISL1 NPM1 PSME3 ORMDL3 AATF TMIGD1 MAP2K4 ERBB3 RHOA HNRNPK …
0.000332811	136	862	1.44653	Positive regulation of cellular protein metabolic process	http://amigo.geneontology.org/amigo/term/GO:0032270	XRCC6 ACVRL1 RIPK1 JARID2 GPLD1 PHF1 CDKN1A HSP90AB1 ARRDC4 LGMN HSP90AA1 PDCD5 SAE1 RUVBL2 NR1H2 PARK7 DOCK7 CDC20 MAP3K4 HDAC2 CAPN3 NDN CCBE1 LARP6 FANCM BMP4 TRIM32 EIF3E SDCBP DDR2 LMNA CCN1 DLC1 DDRGK1 CASS4 PKD1 ANTXR1 SPDYA SPRY2 SEMA4D CLU HIP1R DIABLO ERP29 SPPL3 SART3 SMARCB1 DKK1 VIM SENP2 PAK2 HCLS1 PAXBP1 OGT LOC100525798 AIFM1 PRR5L SGTA C3 ELAVL1 DNMT1 AKAP8 AKAP8L FNIP1 RPS3 FZD4…
0.000332811	26	94	2.53596	Regulation of mRNA stability	http://amigo.geneontology.org/amigo/term/GO:0043488	ZC3H14 PABPC4 PNLDC1 EXOSC3 RIDA PUM2 SAMD4B HNRNPU VIM ELAVL1 DCPS ANGEL2 FASTKD2 NPM1 AXIN2 MEIOC TIRAP DCP1A TARDBP IGF2BP1 FASTK CARHSP1 YTHDF2 YBX1 THRAP3 YTHDF1
0.000348506	60	308	1.78606	Regulation of anatomical structure size	http://amigo.geneontology.org/amigo/term/GO:0090066	SIN3A CFL2 RIN3 E2F4 ARHGAP35 DRAXIN TMOD2 CRABP2 TMOD4 DNAI3 EDN3 ARPC1B SLIT2 SEMA4D HIP1R ARPC3 ACTN2 PRKG1 ACTA2 ARPC4 GRIP2 RYK HCLS1 CDHR5 SWAP70 VAV1 CDHR2 CLNS1A ARPC5 ACTR3 ALS2 HTR2B LMOD2 NPM1 GRB2 SLC9A3R1 NTN1 RHOA TRPM4 CARMIL2 IL20RB POU4F2 GMFB SSH3 CAPZA2 ATP13A2 GPX1 INS SLC12A7 BAG4 RAP1GAP2 RAC1 VASP WDR1 CLN3 WAS GSN GCLM RAB5A CAV3
0.000351867	9	15	5.50108	Cell-extracellular matrix interactions	https://reactome.org/download/current	PARVB FBLIM1 ACTB LIMS1 ILK ARHGEF6 FLNA VASP PXN
0.000357012	91	527	1.58317	Carboxylic acid metabolic process	http://amigo.geneontology.org/amigo/term/GO:0019752	MCAT EP300 ABCD2 ACSBG1 CYP1A2 ARG2 GSTZ1 GPT2 GPI IL4I1 NR1H2 ETFB ACOT7 PARK7 ACADM CTH PARS2 MTHFD1L RARS2 CARNMT1 PEX2 CRABP2 PHGDH KYAT3 ACSS1 PANK2 PSPH HAGH PEX13 TDO2 ETFDH NAAA HADH HPGDS ACADS MTR HK1 PGAM1 GAD2 OXSM DALRD3 NIT2 HSD17B10 OGT CPT1A CARNS1 PC LDHA ACSBG2 FARSA NARS2 DLAT ASNS LPGAT1 ACSL3 AASS ACOX1 GALK1 STAT3 ACACA PIPOX TPH2 CRABP1 EIF6 SLC2A6 PIBF1 MDH1 PDHB ATCAY ALD…
0.000357012	27	100	2.47548	Regulation of RNA splicing	http://amigo.geneontology.org/amigo/term/GO:0043484	DDX17 SRSF3 RBM42 WTAP RBM39 RNPS1 SRSF7 HNRNPU RBM15B RBMX DAZAP1 NPM1 PRDX6 HNRNPK SNW1 KHDRBS1 TIA1 SNRNP70 FASTK RBM8A THRAP3 TRA2B DDX5 U2AF2 C1QBP JMJD6 SRSF10
0.000365011	12	26	4.2316	DOID:65 connective tissue disease	ftp://ftp.rgd.mcw.edu/pub/data_release	COL11A2 SNRPC SNRPA1 COL11A1 PRKG1 ACTA2 MYLK FBN2 NTM SRFBP1 FLNA NDE1
0.000375657	68	364	1.71279	Regulation of cellular protein localization	http://amigo.geneontology.org/amigo/term/GO:1903827	BICD1 HSP90AB1 ABHD17C SIN3A MMP14 AKAP5 GAS8 PDCD5 PARK7 EPB41 LEPROT TCP1 EPB41L2 BMP4 TERF1 CCT3 LMNA FERMT1 DDRGK1 NSFL1C ACTB GCC2 CCT7 CCT4 RAN ANKRD13A ACTN2 BAG3 KIF5B WWTR1 HCLS1 DKC1 STX3 PRR5L SQSTM1 TPR PTPN14 BARD1 ACSL3 NPM1 ORMDL3 STAC2 ITGA3 CEP250 MESD CLTC TARDBP MEPCE ARHGEF16 NVL ATP5IF1 RACK1 PTPN11 ATP13A2 YAP1 FLNA INS BAG4 LRIG2 PID1 BCL2L1 MFHAS1 OS9 CLN3 STOM TRIM28 CEMI…
0.000375657	48	229	1.92177	Non-membrane-bounded organelle assembly	http://amigo.geneontology.org/amigo/term/GO:0140694	MDM1 TUBB CFL2 CENPT LSM14A CEP192 CDC20 MDN1 TPM1 CAPN3 INO80 VPS4B MRPS2 CASQ1 UBAP2L PUM2 DRG1 ACTN2 BCCIP HNRNPU NEBL STAG1 EIF2A RPL24 RPS3 DEUP1 CEP295 TPR FASTKD2 LMOD2 DBNL NPM1 ZNF207 RHOA ARHGEF5 EIF6 CHMP1A TRIM37 PIBF1 YTHDF2 EIF2S1 FLNA C1QBP G3BP1 WDR1 RBM4 YTHDF1 CAV3
0.000380855	145	934	1.42337	Vesicle-mediated transport	http://amigo.geneontology.org/amigo/term/GO:0016192	PACSIN2 BICD1 C2 MFGE8 CPLX3 AKAP5 VIPAS39 RIN3 CDH13 AP1G1 YIF1B NR1H2 KIF17 WASF2 CAP1 VTA1 RIMS1 SNX3 MYO1E AP4E1 TMEM87A VPS4B ANXA1 RAB14 FNBP1 COPS5 SDCBP CD84 COPA SYT6 SEC23B ARFGEF2 VAPB AP5Z1 ACTB TFR2 STX1A GCC2 DPY30 SPAST GRK4 USO1 LAMP1 CLU HIP1R ANKRD13A CORO1C ACTN2 LYST VPS26A SEC24C AP3M1 DKK1 WDR11 CTBP2 PIP4K2A BSN GRIP2 RAB7A NLGN1 DOP1B IL1RAPL1 CDK16 GPRASP1 GPC3 KLC2 STX3 …
0.000392485	45	210	1.96467	Regulation of protein stability	http://amigo.geneontology.org/amigo/term/GO:0031647	EP300 CCDC88C HSP90AA1 PARK7 TCP1 CAPN3 PEX2 CCT3 GLMP LMNA DDRGK1 CCT7 CCT4 AFM NAA15 LAMP1 CLU HIP1R BAG3 APTX TADA3 SENP2 RNF128 CTNND1 CALR USP28 MDM4 CUL3 NPM1 PHB ZNF207 FLOT1 TARDBP SLC2A1 VPS35 TAF9B DACT1 WFS1 FLNA PDCL3 RABL3 CRYAB UBE2B SUGT1 PIN1
0.00039599	20	63	2.91062	RNA Polymerase II Transcription Termination	https://reactome.org/download/current	SARNP SNRPF SRSF3 CDC40 RNPS1 SRSF7 SNRPD3 CSTF2T THOC2 CPSF7 SRSF1 CHTOP SNRPE SNRPG NCBP2 ZC3H11A RBM8A CLP1 ALYREF U2AF2
0.000428618	95	559	1.55815	Negative regulation of apoptotic process	http://amigo.geneontology.org/amigo/term/GO:0043066	YBX3 AMIGO2 RIPK1 HSP90AB1 PKHD1 SIN3A ARG2 LGMN ATF5 PARK7 DRAXIN CTH TXNDC12 CITED2 CAPN3 BMP4 RPS6 TRIM32 COPS5 LMNA CCN1 NAA15 SPRY2 CLU HIP1R SAMD8 PRDX3 BAG3 MGMT NAA35 HIGD1A PAK2 HCLS1 SLC25A5 RELA PRDX5 DDB1 API5 ICAM1 DNMT1 PRDX2 NANOS3 FNIP1 VDAC1 CBL MDM4 ASNS KLHL20 ACVR1 GCG BARD1 HTR2B ACKR3 ISL1 NPM1 PSME3 ORMDL3 AATF TMIGD1 MAP2K4 ERBB3 RHOA HNRNPK FAIM SERPINE1 URI1 TAF9B DLL1 X…
0.000456894	202	1386	1.33624	Regulation of transcription by RNA polymerase II	http://amigo.geneontology.org/amigo/term/GO:0006357	XRCC6 EP300 DDX17 ACVRL1 RARG SARNP YBX3 RIPK1 JARID2 TFEB RUNX2 SIN3A NRL GSC CDH13 THAP11 E2F4 CEBPA ZBTB32 IRF2BP1 RUVBL2 IL4I1 ATF5 NR1H2 PARK7 GRHL3 SS18 CC2D1B ZBTB2 CITED2 NCOA7 CCNC HDAC2 TCF12 INO80 NDN BMP4 ZHX1 TRPS1 PEX2 COPS5 RXRG ATF6 HDGF GLMP RPAP2 CCN1 DDRGK1 RBL1 MAFK TFR2 PKD1 ZC3H8 ARID5A ATOH8 MAML3 DACH1 SEMA4D ZNF395 NCOR2 SMARCB1 ECD DKK1 HIF1AN BAG3 CTBP2 HNRNPU SUV39H2 S…
0.000463874	263	1880	1.28261	Small molecule binding	http://amigo.geneontology.org/amigo/term/GO:0036094	DDX17 TUBA1A ACVRL1 ATP5F1B MYO1A TMEM19 STYK1 CRACR2A ABCD2 TXNRD1 DYRK2 PRPF4B RIPK1 MAK TUBB SKIV2L ITPR3 HSP90AB1 RUNX2 ARHGAP5 ERH NPC2 NEK9 ITPK1 VRK1 HSP90AA1 ATP2C2 DNAJA2 GPT2 TDRD12 ARHGAP35 DHX34 RUVBL2 ACOT7 KIF1B PGD KIF17 ACADM CTH PARS2 MAP3K4 IGF2R TCP1 MTHFD1L HBS1L NT5E RARS2 MDN1 ASCC3 TTK MTO1 EEF1A1 ATP5F1A MYO1E INO80 RAD51 IVD VPS4B CLPX FANCM PSMC6 JAK2 RAB14 UCK1 LCN10 ND…
0.000469801	37	161	2.10704	Protein processing in endoplasmic reticulum	http://www.genome.jp/kegg-bin/show_pathway?ssc04141	CKAP4 HSP90AB1 HSP90AA1 AMFR DNAJA2 DHDH UBE4B ATF6 SEC23B NSFL1C PDIA6 UGGT2 ERP29 UFD1 SEC24C RPN1 DNAJB11 MAP2K7 PRKCSH CALR SAR1B EDEM3 DNAJC10 UBQLN1 RRBP1 SEC62 SSR3 XBP1 WFS1 EIF2S1 TXNDC5 RBX1 OS9 CRYAB SEC61B HERPUD1 DDIT3
0.000469801	154	1008	1.40074	Regulation of cell death	http://amigo.geneontology.org/amigo/term/GO:0010941	RARG YBX3 AMIGO2 RIPK1 GPLD1 CDKN1A HSP90AB1 PKHD1 SIN3A ARG2 LGMN HSP90AA1 PDCD5 DHDH ATF5 PARK7 PIK3CD DRAXIN CTH ANKRD13C OMA1 TXNDC12 TCP1 CITED2 NCOA7 CAPN3 VPS4B BMP4 RPS6 ANXA1 TRIM32 YWHAZ COPS5 ATF6 LMNA CCN1 DLC1 RNPS1 ZC3H8 SLIT2 NAA15 SPRY2 CLU HIP1R DIABLO ERP29 SAMD8 PRDX3 BAG3 MGMT NAA35 HIGD1A MECOM SKIL HRG PAK2 HCLS1 SLC25A5 AIFM1 LRP5 PPP1CA RELA PRDX5 DDB1 TMEM109 MADD API5 IC…
0.00047655	251	1783	1.29068	Anion binding	http://amigo.geneontology.org/amigo/term/GO:0043168	PACSIN2 DDX17 TUBA1A ACVRL1 ATP5F1B MYO1A ARHGAP9 TMEM19 STYK1 CRACR2A ABCD2 TXNRD1 DYRK2 PRPF4B RIPK1 MAK TUBB SKIV2L ITPR3 HSP90AB1 RUNX2 ARHGAP5 NEK9 ITPK1 VRK1 HSP90AA1 ATP2C2 DNAJA2 GPT2 TDRD12 ARHGAP35 DHX34 RUVBL2 KIF1B KIF17 ACADM CTH PARS2 MAP3K4 TCP1 MTHFD1L HBS1L CLVS2 SNX14 RARS2 MDN1 ASCC3 TTK MTO1 EEF1A1 ATP5F1A MYO1E INO80 RAD51 IVD VPS4B CLPX FANCM PSMC6 JAK2 RAB14 UCK1 NDOR1 SDCB…
0.000507634	90	525	1.57174	Regulation of cellular localization	http://amigo.geneontology.org/amigo/term/GO:0060341	BICD1 HSP90AB1 ABHD17C SIN3A MMP14 AKAP5 GAS8 PDCD5 PARK7 EPB41 LEPROT TCP1 EPB41L2 SNX3 CAPN3 BMP4 TERF1 CD84 CASQ1 CCT3 LMNA FERMT1 DDRGK1 NSFL1C MYLK2 ACTB GCC2 CCT7 CCT4 LAMP1 RAN ANKRD13A RYR2 ACTN2 BAG3 HNRNPU KIF5B WWTR1 NLGN1 HCLS1 CDK16 DKC1 LRP5 STX3 PRR5L AKAP8L SQSTM1 UBASH3B TPR PTPN14 GCG BARD1 ACSL3 NPM1 ORMDL3 STAC2 ITGA3 CEP250 MESD NDRG4 CLTC KHDRBS1 TARDBP CDH3 ISCU MEPCE ARHGE…
0.000550903	86	497	1.58649	Chromosome organization	http://amigo.geneontology.org/amigo/term/GO:0051276	XRCC6 PPHLN1 H1-3 HSP90AB1 IPO4 CCNB1IP1 HSP90AA1 CENPT RUVBL2 NUDC RPA2 CDC20 MAP3K4 TCP1 ARID1B ASCC3 TTK INO80 RAD51 VPS4B TERF1 CCT3 DCLRE1B ERCC4 CCT7 CCT4 GEN1 RAN SART3 SMARCB1 HIRA DNA2 HNRNPU SUV39H2 SATB1 ACTR8 XPC MCM2 NAA50 CHAF1B PHF8 LOC100525798 CENPI NAA10 DKC1 RELA MAP2K7 SMARCA4 DNMT1 AKAP8 AKAP8L ANAPC15 MTERF1 TPR MCPH1 CUL3 SSBP1 NPM1 CHMP6 AXIN2 MEIOC ZNF207 CHD3 BRIP1 NUCKS…
0.00055279	45	213	1.937	Regulation of cellular response to growth factor stimulus	http://amigo.geneontology.org/amigo/term/GO:0090287	EP300 ACVRL1 HSP90AB1 RUNX2 SMOC2 CITED2 CD109 RNF165 CCBE1 BMP4 SULF1 SDCBP CCN1 FERMT1 CRIM1 EMILIN1 SLIT2 LRIT3 SPRY2 JCAD SKIL HRG GPC3 SLC9A6 FBN2 FZD4 ELAPOR2 SNX25 ADGRA2 ADAMTS12 ITGA3 ZEB2 SNW1 ILK NRROS PBLD DLL1 HGS PMEPA1 FAM89B PIN1 EPN2 CAV3 LRP2 SNX6
0.000561727	30	120	2.29212	Actomyosin structure organization	http://amigo.geneontology.org/amigo/term/GO:0031032	CFL2 WASF2 CCN2 TPM1 CAPN3 TJP1 CASQ1 RHOC CNN3 DLC1 FHDC1 ACTN2 NEBL PAK2 ARHGAP6 ARAP1 CUL3 LMOD2 RHOA PHLDB2 ARHGEF5 STMN1 BAG4 CGNL1 RAC1 WDR1 WAS ALMS1 PPM1E CAV3
0.000576519	48	233	1.88878	Regulation of cell cycle phase transition	http://amigo.geneontology.org/amigo/term/GO:1901987	CDKN1A SIN3A FBXO31 ATF5 RCC2 RPA2 TTK INO80 VPS4B ANXA1 MTBP CRNN UBE2C PKD1 GEN1 CUL4A MN1 DNA2 XPC TPRA1 CCNB3 DDB1 ANAPC15 USP28 TPR CENPF DTL CUL3 RAD1 NPM1 ZNF207 TAOK1 RPS27L MEPCE CDK4 ATM ZWINT RPL26 TOPAZ1 PTPN11 CTDSP2 DACT1 AIF1 MECP2 DBF4B ATF2 KANK2 ZNF830
0.000596733	118	736	1.46994	Positive regulation of gene expression	http://amigo.geneontology.org/amigo/term/GO:0010628	EP300 RARG RIPK1 TRIM15 RUNX2 MBIP NRL HSP90AA1 PDCD5 CEBPA GPI DHX34 PARK7 PIK3CD GRHL3 CITED2 TCF12 CCBE1 LARP6 BMP4 ANXA1 EXOSC3 TNC TRIM32 EIF3E SULF1 LMNA GSDMD FERMT1 SLC24A3 DDRGK1 MYLK2 ARFGEF2 TFR2 IL1R1 EMILIN1 SPRY2 CLU NCOR2 ERP29 HK1 DKK1 HNRNPU VIM TADA3 PHF8 IRF7 RELA DAZAP1 C3 ELAVL1 DNMT1 CALR RPS3 PANX NIBAN1 ANGEL2 FASTKD2 FZD5 HTR2B IRF5 HOXA5 ISL1 NPM1 AXIN2 MEIOC STAT3 PHB E…
0.000627972	128	813	1.4435	Negative regulation of transcription, DNA-templated	http://amigo.geneontology.org/amigo/term/GO:0045892	XRCC6 EP300 RARG SARNP YBX3 PPHLN1 JARID2 RUNX2 SIN3A GSC THAP11 CEBPA ZBTB32 IRF2BP1 ATF5 NR1H2 CC2D1B ZBTB2 CITED2 HDAC2 COPS2 CAPN3 NDN BMP4 ZHX1 TRPS1 PEX2 HDGF PBXIP1 RBL1 MAFK ZC3H8 ARID5A ATOH8 YWHAQ DACH1 PSPC1 SEMA4D NCOR2 DKK1 HIF1AN BAG3 CTBP2 HNRNPU SUV39H2 SATB1 NR2C2 WWTR1 MECOM SKIL YEATS2 HCLS1 MORC1 RBBP7 RELA PRDX5 RCOR2 SMARCA4 DNMT1 CALR NACC1 SIN3B GATAD2A SQSTM1 FNIP1 MDM4 T…
0.000639923	48	234	1.88071	Ubiquitin-like protein ligase binding	http://amigo.geneontology.org/amigo/term/GO:0044389	TUBA1A RIPK1 TUBB CDKN1A HSP90AB1 HSP90AA1 GPI RPA2 TCP1 YWHAZ DDRGK1 UBE2C ELOB FANCL LRPPRC CUL4A CLU UQCRC1 PRKAR2A SLC25A5 RELA PRR5L CALR SQSTM1 HSPA9 FZD4 CACYBP FZD5 CUL3 PSMD1 SUMO2 AXIN2 SPOP PRDX6 UCHL1 TRIM37 KDM4A CUL5 WFS1 ANAPC2 HGS UBE2K RBX1 BAG4 MFHAS1 TRIM28 UBE2B RALA
0.000639923	35	151	2.12514	Positive regulation of cell cycle process	http://amigo.geneontology.org/amigo/term/GO:0090068	SIN3A RCC2 INO80 VPS4B ANXA1 MTBP CSPP1 CRNN NSFL1C UBE2C SPAST GEN1 CUL4A HNRNPU LRP5 CEP295 CXCR5 TPR DTL CUL3 NPM1 RHOA MEPCE CDK4 CD28 FEN1 TOPAZ1 AIF1 INS MECP2 SFPQ FGF8 DBF4B RANBP1 UBE2B
0.000641606	234	1653	1.29789	Nucleotide binding	http://amigo.geneontology.org/amigo/term/GO:0000166	DDX17 TUBA1A ACVRL1 ATP5F1B MYO1A TMEM19 STYK1 CRACR2A ABCD2 TXNRD1 DYRK2 PRPF4B RIPK1 MAK TUBB SKIV2L HSP90AB1 RUNX2 ARHGAP5 ERH NEK9 ITPK1 VRK1 HSP90AA1 ATP2C2 DNAJA2 TDRD12 ARHGAP35 DHX34 RUVBL2 ACOT7 KIF1B PGD KIF17 ACADM PARS2 MAP3K4 TCP1 MTHFD1L HBS1L NT5E RARS2 MDN1 ASCC3 TTK MTO1 EEF1A1 ATP5F1A MYO1E INO80 RAD51 IVD VPS4B CLPX FANCM PSMC6 JAK2 RAB14 UCK1 NDOR1 DDR2 CCT3 PHGDH RHOC GNAT2 A…
0.000641606	234	1653	1.29789	Nucleoside phosphate binding	http://amigo.geneontology.org/amigo/term/GO:1901265	DDX17 TUBA1A ACVRL1 ATP5F1B MYO1A TMEM19 STYK1 CRACR2A ABCD2 TXNRD1 DYRK2 PRPF4B RIPK1 MAK TUBB SKIV2L HSP90AB1 RUNX2 ARHGAP5 ERH NEK9 ITPK1 VRK1 HSP90AA1 ATP2C2 DNAJA2 TDRD12 ARHGAP35 DHX34 RUVBL2 ACOT7 KIF1B PGD KIF17 ACADM PARS2 MAP3K4 TCP1 MTHFD1L HBS1L NT5E RARS2 MDN1 ASCC3 TTK MTO1 EEF1A1 ATP5F1A MYO1E INO80 RAD51 IVD VPS4B CLPX FANCM PSMC6 JAK2 RAB14 UCK1 NDOR1 DDR2 CCT3 PHGDH RHOC GNAT2 A…
0.000641606	91	536	1.55659	Oxoacid metabolic process	http://amigo.geneontology.org/amigo/term/GO:0043436	MCAT EP300 ABCD2 ACSBG1 CYP1A2 ARG2 GSTZ1 GPT2 GPI IL4I1 NR1H2 ETFB ACOT7 PARK7 ACADM CTH PARS2 MTHFD1L RARS2 CARNMT1 PEX2 CRABP2 PHGDH KYAT3 ACSS1 PANK2 PSPH HAGH PEX13 TDO2 ETFDH NAAA HADH HPGDS ACADS MTR HK1 PGAM1 GAD2 OXSM DALRD3 NIT2 HSD17B10 OGT CPT1A CARNS1 PC LDHA ACSBG2 FARSA NARS2 DLAT ASNS LPGAT1 ACSL3 AASS ACOX1 GALK1 STAT3 ACACA PIPOX TPH2 CRABP1 EIF6 SLC2A6 PIBF1 MDH1 PDHB ATCAY ALD…
0.000673916	47	228	1.88999	Regulation of actin cytoskeleton organization	http://amigo.geneontology.org/amigo/term/GO:0032956	CFL2 ARHGAP35 GRHL3 WASF2 CCN2 TMOD2 TJP1 TMOD4 RHOC DNAI3 DLC1 ARPC1B SLIT2 HIP1R ARPC3 ACTN2 ARPC4 HRG PAK2 HCLS1 ARHGAP6 SWAP70 ARAP1 ARPC5 ACTR3 LMOD2 BAIAP2 GRB2 RHOA PHLDB2 ARHGEF5 CARMIL2 IL20RB STMN1 GMFB SSH3 CAPZA2 BAG4 CGNL1 RAC1 VASP WDR1 WAS GSN ALMS1 PPM1E CAV3
0.000699587	60	316	1.74085	Vesicle membrane	http://amigo.geneontology.org/amigo/term/GO:0012506	PACSIN2 MON2 SCAMP2 CPLX3 AP1G1 RCC2 IGF2R SPACA1 SNX3 VPS4B COPA SEC23B SNX21 STX1A SEMA4C LAPTM4A MFSD10 LAMP1 SPPL3 CORO1C VPS26A SEC24C RAB7A DOP1B UBA1 STX3 SLC12A2 LAMTOR1 ICA1 MR1 CHMP6 GRB2 CYB561 EHD4 CLTC SYN2 CHMP1A SH3BP5 SNX17 IL20RB VPS35 RMC1 VPS37B GABRA2 VAMP7 ARCN1 ATP13A2 VOPP1 SLC11A2 PMEPA1 RAC1 VPS36 CLN3 WAS SLC48A1 MVB12B RAB5A CEMIP EPN2 SNX6
0.000699587	27	104	2.38027	Regulation of RNA stability	http://amigo.geneontology.org/amigo/term/GO:0043487	ZC3H14 PABPC4 PNLDC1 EXOSC3 RIDA PUM2 SAMD4B HNRNPU VIM DKC1 ELAVL1 DCPS ANGEL2 FASTKD2 NPM1 AXIN2 MEIOC TIRAP DCP1A TARDBP IGF2BP1 FASTK CARHSP1 YTHDF2 YBX1 THRAP3 YTHDF1
0.0007041	36	158	2.08902	Positive regulation of protein-containing complex assembly	http://amigo.geneontology.org/amigo/term/GO:0031334	HSP90AA1 NR1H2 PARK7 TERF1 RHOC DNAI3 FERMT1 ARPC1B SLAIN2 CLU HIP1R ARPC3 DRG1 ARPC4 FNIP1 RPS3 MMP1 AKAP9 ARPC5 ACTR3 NRG1 LMOD2 GRB2 RHOA TIRAP ARHGEF5 CARMIL2 IL20RB GMFB RACK1 BAG4 MECP2 RAC1 VASP WAS GSN
0.000718572	128	816	1.43819	Negative regulation of nucleic acid-templated transcription	http://amigo.geneontology.org/amigo/term/GO:1903507	XRCC6 EP300 RARG SARNP YBX3 PPHLN1 JARID2 RUNX2 SIN3A GSC THAP11 CEBPA ZBTB32 IRF2BP1 ATF5 NR1H2 CC2D1B ZBTB2 CITED2 HDAC2 COPS2 CAPN3 NDN BMP4 ZHX1 TRPS1 PEX2 HDGF PBXIP1 RBL1 MAFK ZC3H8 ARID5A ATOH8 YWHAQ DACH1 PSPC1 SEMA4D NCOR2 DKK1 HIF1AN BAG3 CTBP2 HNRNPU SUV39H2 SATB1 NR2C2 WWTR1 MECOM SKIL YEATS2 HCLS1 MORC1 RBBP7 RELA PRDX5 RCOR2 SMARCA4 DNMT1 CALR NACC1 SIN3B GATAD2A SQSTM1 FNIP1 MDM4 T…
0.000718572	128	816	1.43819	Negative regulation of RNA biosynthetic process	http://amigo.geneontology.org/amigo/term/GO:1902679	XRCC6 EP300 RARG SARNP YBX3 PPHLN1 JARID2 RUNX2 SIN3A GSC THAP11 CEBPA ZBTB32 IRF2BP1 ATF5 NR1H2 CC2D1B ZBTB2 CITED2 HDAC2 COPS2 CAPN3 NDN BMP4 ZHX1 TRPS1 PEX2 HDGF PBXIP1 RBL1 MAFK ZC3H8 ARID5A ATOH8 YWHAQ DACH1 PSPC1 SEMA4D NCOR2 DKK1 HIF1AN BAG3 CTBP2 HNRNPU SUV39H2 SATB1 NR2C2 WWTR1 MECOM SKIL YEATS2 HCLS1 MORC1 RBBP7 RELA PRDX5 RCOR2 SMARCA4 DNMT1 CALR NACC1 SIN3B GATAD2A SQSTM1 FNIP1 MDM4 T…
0.000727077	143	932	1.40675	Regulation of programmed cell death	http://amigo.geneontology.org/amigo/term/GO:0043067	RARG YBX3 AMIGO2 RIPK1 GPLD1 CDKN1A HSP90AB1 PKHD1 SIN3A ARG2 LGMN HSP90AA1 PDCD5 DHDH ATF5 PARK7 PIK3CD DRAXIN CTH ANKRD13C OMA1 TXNDC12 TCP1 CITED2 CAPN3 BMP4 RPS6 ANXA1 TRIM32 COPS5 ATF6 LMNA CCN1 DLC1 RNPS1 ZC3H8 SLIT2 NAA15 SPRY2 CLU HIP1R DIABLO ERP29 SAMD8 PRDX3 BAG3 MGMT NAA35 HIGD1A MECOM SKIL HRG PAK2 HCLS1 SLC25A5 LRP5 PPP1CA RELA PRDX5 DDB1 MADD API5 ICAM1 DNMT1 PRDX2 NANOS3 FNIP1 VDA…
0.000727077	129	824	1.43535	Organonitrogen compound catabolic process	http://amigo.geneontology.org/amigo/term/GO:1901565	USP15 RIPK1 GPLD1 HSP90AB1 ABHD17C HEXA LGMN HSP90AA1 FBXO9 FBXO31 AMFR IL4I1 ACOT7 PARK7 UBE4B OMA1 CDC20 NT5E SNX3 RNF165 CAPN3 VPS4B CLPX PSMC6 TRIM32 DPYS RIDA SDCBP PGLYRP4 DPYD DDRGK1 UBE2C HMOX2 PKD1 TDO2 UBA6 USP12 CUL4A CLU UFD1 IDE ATE1 RAB7A WWTR1 HSD17B10 OGT GPC3 RELA DDB1 RAPSN SGTA USP28 CBL MDM4 PSMC2 KLHL20 EDEM3 DTL C4BPB DNAJC10 SERPINE2 CUL3 PSMD1 AASS ADAMTS12 RNF180 CHMP6 SG…
0.000802728	158	1051	1.37832	Cell projection	http://amigo.geneontology.org/amigo/term/GO:0042995	PARVB DDN MYO1A PTPRO MAK HSP90AB1 PKHD1 GPHN BBOF1 CEP128 ZC3H14 RIN3 SLC28A1 GAS8 CDH13 CFAP20 GPI CATSPERG ARHGAP35 IL4I1 PDPN UBXN10 KIF17 WASF2 ACADM CCDC68 TPM1 NDN RPS6 ANXA1 ANKS6 ODF2 KCNQ3 COPA IGSF9 RHOC KCNA3 ABCA4 DNAI3 DLC1 PLCB4 ACTB STX1A IFT140 PKD1 TEDC2 NPHP1 ANTXR1 DPYSL5 MFSD10 FHDC1 ABCG2 ARHGEF7 CLU HIP1R ARPC3 CORO1C SNAP29 ACTN2 PKD2L1 ABLIM1 WDR11 HNRNPU JCAD KIF5B VIM G…
0.000809324	86	503	1.56757	Regulation of cellular catabolic process	http://amigo.geneontology.org/amigo/term/GO:0031329	ABCD2 GPLD1 TFEB HSP90AB1 ZC3H14 HSP90AA1 DHX34 PARK7 PABPC4 MTCL1 PNLDC1 EXOSC3 RIDA SDCBP ATF6 ELAPOR1 DDRGK1 ERCC4 PKD1 LRPPRC PUM2 CLU PGAM1 BAG3 SAMD4B HNRNPU VIM PIP4K2A ABHD5 OGT SLC25A5 AIFM1 DKC1 PRR5L EIF4G2 SGTA ELAVL1 VDAC1 DCPS ANGEL2 FASTKD2 HTR2B ZC3HAV1 RNF180 NPM1 SUMO2 AXIN2 GFAP MEIOC PSME3 STAT3 ORMDL3 PHF23 UBQLN1 DEPP1 TIRAP DCP1A TARDBP IGF2BP1 OPTN PAFAH1B2 FASTK ATM VPS35…
0.000811134	154	1020	1.38426	Regulation of intracellular signal transduction	http://amigo.geneontology.org/amigo/term/GO:1902531	EP300 USP15 YBX3 DYRK2 RIPK1 TRIM15 HSP90AB1 PKHD1 MBIP AKAP5 SIPA1L1 FBXO9 CDH13 ARHGAP35 PARK7 PIK3CD RPA2 CEP192 GAREM1 MAPRE2 CTH TXNDC12 MAP3K4 CCN2 CAPN3 UACA BMP4 TRIM32 YWHAZ COPS5 CRNN MAGI3 CCN1 DLC1 ARFGEF2 SEMA4C EMILIN1 PUM2 GEN1 SLIT2 SPRY2 CUL4A SEMA4D CLU ERP29 SPPL3 KLHL22 UFD1 RASGEF1A SAMD8 DKK1 CEP55 JCAD EFHB RYK MECOM SKIL HCLS1 OGT RELA TKFC MADD PRR5L MAP2K7 ICAM1 CALR SQS…
0.000815126	27	105	2.3576	Transcription corepressor activity	http://amigo.geneontology.org/amigo/term/GO:0003714	SIN3A IRF2BP1 RUVBL2 CITED2 COPS2 HDGF PBXIP1 ARID5A NCOR2 CTBP2 HNRNPU WWTR1 RCOR2 SMARCA4 SIN3B PHB GPS2 NRIP1 SNW1 URI1 YAP1 TLE5 SPEN MECP2 C1QBP TRIM28 IRF2BP2
0.000835222	93	555	1.53634	Organic acid metabolic process	http://amigo.geneontology.org/amigo/term/GO:0006082	MCAT EP300 ABCD2 ACSBG1 CYP1A2 ARG2 GSTZ1 GPT2 GPI IL4I1 NR1H2 ETFB ACOT7 PARK7 ACADM CTH PARS2 MTHFD1L RARS2 CARNMT1 PEX2 CRABP2 PHGDH KYAT3 ACSS1 PANK2 PSPH HAGH PEX13 TDO2 ETFDH NAAA HADH HPGDS ABCG2 ACADS MTR HK1 PGAM1 GAD2 OXSM DALRD3 NIT2 HSD17B10 OGT CPT1A CARNS1 PC LDHA ACSBG2 FARSA NARS2 DLAT ASNS LPGAT1 ACSL3 AASS ACOX1 GALK1 STAT3 ACACA PIPOX TPH2 CRABP1 EIF6 SLC2A6 PIBF1 MDH1 PDHB ATC…
0.00083886	139	904	1.40975	Regulation of apoptotic process	http://amigo.geneontology.org/amigo/term/GO:0042981	RARG YBX3 AMIGO2 RIPK1 GPLD1 HSP90AB1 PKHD1 SIN3A ARG2 LGMN HSP90AA1 PDCD5 DHDH ATF5 PARK7 PIK3CD DRAXIN CTH ANKRD13C OMA1 TXNDC12 TCP1 CITED2 CAPN3 BMP4 RPS6 ANXA1 TRIM32 COPS5 ATF6 LMNA CCN1 DLC1 RNPS1 ZC3H8 SLIT2 NAA15 SPRY2 CLU HIP1R DIABLO ERP29 SAMD8 PRDX3 BAG3 MGMT NAA35 HIGD1A SKIL HRG PAK2 HCLS1 SLC25A5 LRP5 PPP1CA RELA PRDX5 DDB1 MADD API5 ICAM1 DNMT1 PRDX2 NANOS3 FNIP1 VDAC1 RPS3 CTSC …
0.000865094	57	298	1.7537	Transcription regulator complex	http://amigo.geneontology.org/amigo/term/GO:0005667	XRCC6 EP300 RARG RUNX2 SIN3A GSC E2F4 CEBPA HIF3A ATF5 TAF4B MED23 ASCC3 GTF3C6 HDAC2 TCF12 TCEA1 CREG1 HDGF GTF2B RBL1 GTF3C1 NAA15 DACH1 NCOR2 CTBP2 HNRNPU TADA3 WWTR1 HCLS1 RBBP7 RELA GTF2H1 GTF3C3 STAT3 AATF GPS2 TAF13 CHD3 ASCC1 TAF4 CDK4 POU4F2 TAF9B DR1 YAP1 TAF6 GTF2F2 SPEN SFPQ MAX TRIM28 RBM4 RELB MEIS1 CBX5 DDIT3
0.000924448	55	285	1.76935	Nuclear speck	http://amigo.geneontology.org/amigo/term/GO:0016607	PACSIN2 DDX17 CKAP4 PRPF4B SRSF3 ZC3H14 SLC28A1 SF3A3 FBXL4 CDC40 TCF12 TRIM69 SNRPA1 VIRMA LMNA RBM39 AP5Z1 CD2BP2 RNPS1 MAML3 ZNF395 SYNPO2L HNRNPU RBM15B PHF7 MECOM NFKBIZ CCNB3 DGKZ API5 DDX39A AKAP8L RUFY1 CWC15 SF3B1 BARD1 NPM1 EFTUD2 SRSF1 NRIP1 CHTOP SNW1 SRRM2 SNRNP70 POU4F2 EP400 RBM8A THRAP3 ALYREF U2AF2 PHF5A SRSF10 RBM4 C5H12orf57 ZNF830
0.000927035	139	906	1.40664	Plasma membrane bounded cell projection organization	http://amigo.geneontology.org/amigo/term/GO:0120036	PARVB EP300 MYO1A PTPRO CECR2 MAK HSP90AB1 PKHD1 SIN3A SIPA1L1 LGMN GAS8 CDH13 E2F4 CFAP20 ARHGAP35 DRAXIN PDPN RCC2 UBXN10 WASF2 DOCK7 RIMS1 RNF165 NDN TNC TRIM32 ODF2 TOX IGSF9 CRABP2 PHGDH IFT140 DPYSL5 SLIT2 UBA6 FHDC1 STK24 ARHGEF7 SEMA4D NEK1 CORO1C YWHAH SNAP29 ACTN2 PRKG1 LGI1 ABLIM1 VIM ARMC4 RYK WWTR1 NLGN1 HRG PAK2 MYLK RPL24 CDK16 SLC9A6 MCF2 SLITRK2 CDHR5 PRKCSH ICAM1 GPRIN1 CDHR2 CA…
0.00092936	43	205	1.92314	Chemical carcinogenesis	http://www.genome.jp/kegg-bin/show_pathway?ssc05208	ATP5F1B VEGFA CYP1A2 NQO1 COX6B PIK3CD ATP5F1A UQCRC2 COX5B LOC100516606 ACP1 SAMD8 NDUFB6 UQCRC1 SLC25A5 RELA MAP2K7 VDAC1 NDUFA2 NDUFS6 GRB2 ATP5MC1 MAP2K4 SDHA NDUFV3 NDUFS7 COX5A LOC100624067 PTPN11 NDUFB4 CYC1 NDUFS3 ATP5PD SLC25A6 ATP5F1C RAC1 ATP5F1D LOC100153094 ATP5PB NDUFA5 AKT1 HMOX1 SOD2
0.000943029	52	265	1.79909	Regulation of apoptotic signaling pathway	http://amigo.geneontology.org/amigo/term/GO:2001233	YBX3 RIPK1 PARK7 CTH TXNDC12 BMP4 TRIM32 LMNA CLU ERP29 SAMD8 SKIL PAK2 SLC25A5 PPP1CA RELA MADD ICAM1 PRDX2 NANOS3 RPS3 CTSC ACVR1 ACKR3 SLC9A3R1 PSME3 AATF UBQLN1 DAPK2 HNRNPK SERPINE1 IL20RB URI1 RPL26 RACK1 XBP1 YAP1 NDUFS3 PEA15 PLAUR TMEM161A GPX1 BCL2L1 SFPQ EEF1E1 SIAH1 GCLM HMOX1 HERPUD1 EYA1 TPT1 DDIT3
0.000943029	34	148	2.10627	Cell cortex	http://amigo.geneontology.org/amigo/term/GO:0005938	MYO1A EPB41 CAP1 EPB41L2 EPB42 FRMPD1 SPTA1 DLC1 ACTB SEPTIN11 HIP1R ACTR1A CTBP2 MYRIP BSN TPM4 CALD1 EXOC4 MKLN1 SEPTIN7 DBNL SEPTIN9 RHOA PHLDB2 PPFIA3 FLOT1 LANCL2 CAPZA2 FAM110C KNCN TNFAIP2 EXOC3L4 MARCKS EXOC3
0.000943029	137	891	1.40974	Gene expression (Transcription)	https://reactome.org/download/current	EP300 RARG SARNP SNRPF DYRK2 JARID2 DEK PHF1 SRSF3 CDKN1A RUNX2 SIN3A PPP1R13B E2F4 ZNF382 ZNF568 NR1H2 ZNF582 INTS11 TAF4B ZNF671 ARID1B CITED2 MED23 CCNC GTF3C6 CDC40 HDAC2 ICE2 TCF12 LEO1 INTS14 SNAPC3 TXN YWHAZ TCEA1 RXRG RPAP2 GTF2B RBL1 YWHAB ACTB GTF3C1 RNPS1 ELOB ZC3H8 CNOT11 SRSF7 DPY30 YWHAQ MAML3 CDK8 RAN NCOR2 YWHAH SNRPD3 SMARCB1 CSTF2T CTSL NR2C2 WWTR1 SKIL RBBP7 MED14 ZNF157 MED12 …
0.000943029	58	306	1.73781	Cell cycle phase transition	http://amigo.geneontology.org/amigo/term/GO:0044770	CDKN1A SIN3A FBXO31 E2F4 ATF5 RCC2 RPA2 TTK INO80 VPS4B RPS6 ANXA1 MTBP NES CRNN UBE2C PKD1 SPAST SPDYA GEN1 CUL4A MN1 DNA2 XPC TPRA1 RPL24 CCNB3 PHF8 DDB1 AKAP8 AKAP8L ANAPC15 USP28 TPR CENPF DTL ACVR1 CUL3 RAD1 NPM1 ZNF207 TAOK1 RPS27L MEPCE CDK4 ATM ZWINT RPL26 TOPAZ1 PTPN11 CTDSP2 DACT1 AIF1 MECP2 DBF4B ATF2 KANK2 ZNF830
0.000953643	161	1079	1.36805	Small molecule metabolic process	http://amigo.geneontology.org/amigo/term/GO:0044281	MCAT EP300 ATP5F1B ABCD2 DYRK2 ACSBG1 MAN2C1 CYP1A2 ARG2 GSTZ1 ITPK1 GPT2 CEBPA GPI IL4I1 NR1H2 ETFB ACOT7 PARK7 PGD ACADM CTH PARS2 CTPS1 MTHFD1L NT5E RARS2 ATP5F1A MTAP CARNMT1 TXN DPYS PEX2 CRABP2 PHGDH DPYD KYAT3 EEF1D ACSS1 PANK2 PSPH HAGH SPR PEX13 TDO2 ETFDH PAICS NAAA HADH HPGDS ABCG2 RAN NCOR2 COQ5 ACADS MTR HK1 ADK PGAM1 GAD2 OXSM DALRD3 QRICH1 ACP3 ATP6V1A NIT2 HSD17B10 OGT CPT1A LRP5 …
0.000963557	15	42	3.27445	Spliceosomal snRNP complex	http://amigo.geneontology.org/amigo/term/GO:0097525	SNRPC SF3A3 CD2BP2 SART3 LSM7 SF3B1 EFTUD2 LSM8 SNRPE SNRNP70 SNRPG USP39 SNRPD2 PHF5A LSM2
0.000983151	22	78	2.58598	Methyltransferase complex	http://amigo.geneontology.org/amigo/term/GO:0034708	JARID2 PHF1 ERH RUVBL2 HDAC2 VIRMA DPY30 RBM15B WDR82 RBBP7 CLNS1A KMT2C SNRPE TRIM37 TAF4 SNRPG WDR5 SNRPD2 TAF6 TRMT61A MAX CBX5
0.00104299	65	356	1.67402	Alzheimer disease	http://www.genome.jp/kegg-bin/show_pathway?ssc05010	TUBA1A ATP5F1B TUBB ITPR3 ATG2B COX6B PIK3CD ATP5F1A PSMC6 ATF6 PSMD4 PLCB4 UQCRC2 COX5B LOC100516606 SAMD8 DKK1 FAS IDE NDUFB6 KIF5B CALML5 UQCRC1 HSD17B10 SLC25A5 LRP5 KLC2 RELA RAPSN MAP2K7 VDAC1 NDUFA2 FZD4 PSMC2 FZD5 PSMD1 NDUFS6 AXIN2 ATP5MC1 SDHA NDUFV3 NDUFS7 COX5A DVL2 PSMB1 SLC39A6 LOC100624067 XBP1 NDUFB4 CYC1 NDUFS3 ATP5PD EIF2S1 SLC25A6 INS SLC11A2 ATP5F1C ATP5F1D PSMD9 ATP5PB NDUFA5…
0.00113021	45	220	1.87537	Ubiquitin protein ligase binding	http://amigo.geneontology.org/amigo/term/GO:0031625	TUBA1A RIPK1 TUBB CDKN1A HSP90AB1 HSP90AA1 GPI RPA2 TCP1 YWHAZ ELOB FANCL LRPPRC CUL4A CLU UQCRC1 PRKAR2A SLC25A5 RELA PRR5L CALR SQSTM1 HSPA9 FZD4 CACYBP FZD5 CUL3 PSMD1 SUMO2 AXIN2 SPOP PRDX6 UCHL1 TRIM37 KDM4A CUL5 WFS1 ANAPC2 UBE2K RBX1 BAG4 MFHAS1 TRIM28 UBE2B RALA
0.00113206	28	113	2.27183	The citric acid (TCA) cycle and respiratory electron transport	https://reactome.org/download/current	ATP5F1B SLC25A27 GSTZ1 ETFB PDP1 HAGH LDHA ECSIT VDAC1 NDUFA2 DLAT DLD NDUFS6 ATP5MC1 NDUFV3 ATP5ME NDUFS7 COQ10A PDHB DMAC2L NDUFB4 NDUFS3 ATP5PD ATP5F1C ATP5F1D CS ATP5PB NDUFA5
0.00113356	129	833	1.41985	Regulation of response to stress	http://amigo.geneontology.org/amigo/term/GO:0080134	XRCC6 YBX3 PARPBP RIPK1 DEK HSP90AB1 SIN3A MBIP ARG2 HSP90AA1 AP1G1 AMFR CEBPA LSM14A NR1H2 PARK7 RPA2 TXNDC12 SMOC2 MAP3K4 ARMT1 CCN2 NCOA7 NT5E CD109 RAD51 LRFN5 JAK2 ANXA1 TRIM32 COPS5 ATF6 LMNA MAGI3 FERMT1 DDRGK1 RBL1 ERCC4 IL1R1 SEMA4C ELMOD2 STK24 LAMP1 CUL4A PSPC1 CLU ERP29 UFD1 PRKG1 MGMT MECOM SKIL HRG MYLK NFKBIZ IRF7 RELA TKFC SGTA C3 VAV1 CDC37 PRDX2 CRHBP RPS3 CTSC CHORDC1 RNF26 UBA…
0.00113607	30	125	2.20043	Oxidative phosphorylation	http://www.genome.jp/kegg-bin/show_pathway?ssc00190	ATP5F1B COX6B ATP5F1A UQCRC2 ATP6V0C COX5B LOC100516606 ATP6V1C2 NDUFB6 UQCRC1 ATP6V1A NDUFA2 NDUFS6 ATP5MC1 SDHA NDUFV3 ATP5ME NDUFS7 COX5A LOC100624067 NDUFB4 CYC1 NDUFS3 ATP5PD TMEM268 ATP6V1D ATP5F1C ATP5F1D ATP5PB NDUFA5
0.00114658	84	494	1.55901	Protein modification by small protein conjugation	http://amigo.geneontology.org/amigo/term/GO:0032446	HSP90AB1 CCNB1IP1 ARRDC4 HSP90AA1 FBXO9 AMFR IRF2BP1 SAE1 PARK7 UBE4B RNF138 CDC20 RNF165 LEO1 TRIM69 CAPN3 FANCM TRIM32 MTBP UFC1 RUSC1 DDRGK1 UBE2C STX1A RNF181 FANCL UBA6 SPRY2 CUL4A WSB2 PPIL2 KLHL22 UBA5 WWTR1 SENP2 OGT RELA DDB1 PRMT3 MARCHF2 SQSTM1 RPS3 CBL RNF26 KLHL20 DTL BARD1 CUL3 RNF180 NPM1 TRIM47 SUMO2 PHF23 GPS2 SPOP CDC16 UBQLN1 RNF216 TRPM4 TRIM37 KLHL15 RLIM NXN RACK1 PCGF3 LTN1…
0.00119436	189	1307	1.32581	Phosphorylation	http://amigo.geneontology.org/amigo/term/GO:0016310	XRCC6 EP300 ACVRL1 USP15 PTPRO STYK1 DYRK2 PRPF4B RIPK1 MAK CDKN1A HSP90AB1 NEK9 CCDC88C VRK1 HSP90AA1 GPI PARK7 PIK3CD DOCK7 MAP3K4 PPP1R14C TTK CD109 COPS2 RAD51 BMP4 JAK2 YWHAZ SDCBP DDR2 CCN1 DDRGK1 MYLK2 RBL1 CASS4 PKD1 MAP4K3 SPDYA EMILIN1 GRK4 SLIT2 CDK8 NEK5 SPRY2 STK24 SEMA4D CLU NEK1 ERP29 DYNLL1 CORO1C HK1 DKK1 PRKG1 PGAM1 PRDX3 BCCIP HNRNPU PIP4K2A PRKAR2A TADA3 RYK WWTR1 EIF2A HRG PA…
0.00119947	155	1037	1.37041	Plasma membrane bounded cell projection	http://amigo.geneontology.org/amigo/term/GO:0120025	PARVB MYO1A PTPRO MAK HSP90AB1 PKHD1 GPHN BBOF1 CEP128 ZC3H14 RIN3 SLC28A1 GAS8 CDH13 CFAP20 GPI CATSPERG ARHGAP35 IL4I1 PDPN UBXN10 KIF17 WASF2 ACADM CCDC68 TPM1 RPS6 ANXA1 ANKS6 ODF2 KCNQ3 COPA IGSF9 RHOC KCNA3 ABCA4 DNAI3 DLC1 PLCB4 ACTB STX1A IFT140 PKD1 TEDC2 NPHP1 ANTXR1 DPYSL5 MFSD10 FHDC1 ABCG2 ARHGEF7 CLU HIP1R ARPC3 CORO1C SNAP29 ACTN2 PKD2L1 ABLIM1 WDR11 HNRNPU JCAD KIF5B VIM GAD2 ARMC…
0.00124759	71	401	1.62334	Anchoring junction	http://amigo.geneontology.org/amigo/term/GO:0070161	PARVB PACSIN2 FBLIM1 WASF2 EPB41L3 MAPRE2 GJA10 MYO1E TJP1 JAK2 PGM5 KIRREL1 MAGI3 DLC1 FERMT1 CASS4 ACTB NPHP1 CTNNA2 THSD1 TNFSF13B ACTN2 OPALIN JCAD PAK2 UBA1 PPP1CA STX3 CTNND1 PLEKHA7 VAV1 FZD4 NPHS2 ACTR3 IRF2 FZD5 SRP68 ITGB4 GRB2 CDC42EP4 SLC2A2 RHOA PHLDB2 FLOT1 DSG2 LIN7C CLMP CDH3 ILK TMEM47 THEMIS CDK4 IL20RB MPP4 TNS1 DLL1 FOCAD PALLD MAGI2 FLNA CLDN19 VASP WDR1 WAS GSN PLEC ARL14EP …
0.00124759	10	21	4.36593	Negative regulation of stress fiber assembly	http://amigo.geneontology.org/amigo/term/GO:0051497	WASF2 TJP1 DLC1 PAK2 ARHGAP6 ARAP1 PHLDB2 STMN1 CGNL1 WAS
0.0012794	99	607	1.49535	Protein modification by small protein conjugation or removal	http://amigo.geneontology.org/amigo/term/GO:0070647	USP15 COPS7A HSP90AB1 CCNB1IP1 ARRDC4 HSP90AA1 FBXO9 AMFR IRF2BP1 SAE1 PARK7 UBE4B RNF138 CDC20 RNF165 LEO1 COPS2 TRIM69 CAPN3 FANCM TRIM32 MTBP COPS5 UFC1 RUSC1 DDRGK1 UBE2C STX1A RNF181 FANCL UBA6 USP12 SPRY2 CUL4A WSB2 SART3 PPIL2 KLHL22 STAMBPL1 UBA5 WWTR1 SENP2 OGT RELA DDB1 PRMT3 MARCHF2 SQSTM1 RPS3 USP28 CBL RNF26 KLHL20 DTL BARD1 CUL3 RNF180 NPM1 TRIM47 SUMO2 PHF23 GPS2 COPS3 SPOP CDC16 U…
0.00132146	16	48	3.05615	Small nuclear ribonucleoprotein complex	http://amigo.geneontology.org/amigo/term/GO:0030532	SNRPC SF3A3 CD2BP2 SART3 LSM7 SF3B1 EFTUD2 LSM8 SNRPE MEPCE SNRNP70 SNRPG USP39 SNRPD2 PHF5A LSM2
0.00132289	47	235	1.83369	Organelle inner membrane	http://amigo.geneontology.org/amigo/term/GO:0019866	SUN2 OMA1 ATP5F1A UQCRC2 TRAP1 LOC100516606 MFSD10 ETFDH CLU COQ5 NDUFB6 SLC25A5 SLC25A22 TIMM44 TIMM29 SFXN1 LMNB1 NDUFA2 RPS3 AGK CHCHD3 NDUFS6 PHB SDHA TMX4 NDUFV3 ATP5ME COX5A IMMT CYP11A1 LOC100624067 MTG1 TRA2B NDUFB4 NDUFS3 ATP5MD ATP5PD SLC25A6 ATP5MF ATP5F1C ATP5F1D SHMT2 ATP5PB NDUFA5 STOML2 TYMS TMEM65
0.00134619	103	638	1.48017	Protein catabolic process	http://amigo.geneontology.org/amigo/term/GO:0030163	USP15 RIPK1 GPLD1 HSP90AB1 ABHD17C LGMN HSP90AA1 FBXO9 FBXO31 AMFR PARK7 UBE4B OMA1 CDC20 SNX3 RNF165 CAPN3 VPS4B CLPX PSMC6 TRIM32 SDCBP DDRGK1 UBE2C PKD1 UBA6 USP12 CUL4A CLU UFD1 IDE ATE1 RAB7A WWTR1 OGT GPC3 RELA DDB1 RAPSN SGTA USP28 CBL MDM4 PSMC2 KLHL20 EDEM3 DTL C4BPB DNAJC10 SERPINE2 CUL3 PSMD1 ADAMTS12 RNF180 CHMP6 SGSH SUMO2 GFAP PSME3 PHB SPOP UBQLN1 RNF216 UCHL1 CTSB ATM VPS35 ATP5IF…
0.00137444	74	424	1.60016	Microtubule cytoskeleton organization	http://amigo.geneontology.org/amigo/term/GO:0000226	SUN2 TUBA1A MDM1 BICD1 TUBB PKHD1 GAS8 LSM14A ATF5 NUDC MAP7D1 CEP192 SS18 DOCK7 CDC20 CCDC68 INO80 IVD VPS4B CNTLN ODF2 LMNA NSFL1C PKD1 GCC2 SPAST GEN1 SLAIN2 SPRY2 DRG1 BCCIP HNRNPU ARMC4 STAG1 RGS14 RPS3 CHORDC1 DEUP1 CEP295 HOATZ AKAP9 TPR MCPH1 TACC1 SPEF2 NPM1 ZNF207 TAOK1 CEP250 CHD3 RHOA PHLDB2 CLTC CRMP1 CHMP1A TRIM37 DNAI2 PIBF1 TRAF3IP1 STMN1 CEP85 CAMSAP2 MAPRE3 XRCC2 FLNA MECP2 TBCE…
0.00143148	99	609	1.49044	Organelle envelope	http://amigo.geneontology.org/amigo/term/GO:0031967	SUN2 NUP107 PARP11 TUBB SLC25A27 ACADM OMA1 IGF2R FBXL4 ATP5F1A ARMC1 SDCBP SPATA46 LMNA PANK2 STX1A UQCRC2 TRAP1 COX5B FANCL LOC100516606 SPAST PUM2 MFSD10 ETFDH CLU RAN COQ5 SAMD8 NDUFB6 RBM15B SENP2 PHF8 TIMM8A SLC25A5 PGRMC1 AIFM1 SLC25A22 CPT1A TIMM44 TIMM29 CALR SFXN1 LMNB1 VDAC1 NDUFA2 COA4 RPS3 CACYBP TPR CENPF GTF3C3 AGK CHCHD3 NLN BNIP1 TENT4A NDUFS6 ITGB4 FKBP10 PHB SDHA TMX4 BRIP1 NDU…
0.00143148	99	609	1.49044	Envelope	http://amigo.geneontology.org/amigo/term/GO:0031975	SUN2 NUP107 PARP11 TUBB SLC25A27 ACADM OMA1 IGF2R FBXL4 ATP5F1A ARMC1 SDCBP SPATA46 LMNA PANK2 STX1A UQCRC2 TRAP1 COX5B FANCL LOC100516606 SPAST PUM2 MFSD10 ETFDH CLU RAN COQ5 SAMD8 NDUFB6 RBM15B SENP2 PHF8 TIMM8A SLC25A5 PGRMC1 AIFM1 SLC25A22 CPT1A TIMM44 TIMM29 CALR SFXN1 LMNB1 VDAC1 NDUFA2 COA4 RPS3 CACYBP TPR CENPF GTF3C3 AGK CHCHD3 NLN BNIP1 TENT4A NDUFS6 ITGB4 FKBP10 PHB SDHA TMX4 BRIP1 NDU…
0.00146881	94	572	1.50671	Regulation of anatomical structure morphogenesis	http://amigo.geneontology.org/amigo/term/GO:0022603	PARVB ACVRL1 RUNX2 PKHD1 SIPA1L1 ARHGAP35 PIK3CD DRAXIN PDPN RCC2 GRHL3 EPB41 OMA1 SMOC2 CITED2 RIMS1 TPM1 TJP1 CCBE1 BMP4 ANXA1 RSPO2 SULF1 SPTA1 CRABP2 STRIP1 DLC1 CASS4 GTF2I EMILIN1 SPRY2 TNFSF13B SEMA4D CORO1C YWHAH DKK1 STAB1 RYK NLGN1 HRG MED12 GPC3 C3 CALR PKN1 ARAP1 FZD4 ANGPT2 ADGRA2 FMNL2 STK25 MKLN1 HOXA5 MYO10 ADAMTS12 ISL1 BAIAP2 SLC9A3R1 CDC42EP4 STAT3 SERPINF1 NTN1 PHLDB2 ILK HSPB…
0.00148007	8	14	5.23912	Negative regulation of mRNA splicing, via spliceosome	http://amigo.geneontology.org/amigo/term/GO:0048025	RBM42 RNPS1 SRSF7 NPM1 HNRNPK U2AF2 C1QBP SRSF10
0.00148895	30	127	2.16578	Protein stabilization	http://amigo.geneontology.org/amigo/term/GO:0050821	EP300 HSP90AA1 PARK7 TCP1 CCT3 GLMP CCT7 CCT4 AFM NAA15 LAMP1 CLU HIP1R BAG3 CTNND1 CALR MDM4 NPM1 PHB ZNF207 FLOT1 SLC2A1 TAF9B WFS1 FLNA PDCL3 RABL3 CRYAB UBE2B PIN1
0.00152483	23	86	2.45203	MRNA surveillance pathway	http://www.genome.jp/kegg-bin/show_pathway?ssc03015	ACIN1 PABPC4 HBS1L RNPS1 PAPOLG PPP1CB PPP2R2A CSTF2T WDR82 PPP1CA PPP2R5B CPSF7 DAZAP1 ETF1 TARDBP PPP2R1A UPF3A NCBP2 RBM8A CLP1 SMG1 ALYREF PABPC5
0.00153707	34	152	2.05084	Positive regulation of cytoskeleton organization	http://amigo.geneontology.org/amigo/term/GO:0051495	CFL2 CCN2 VPS4B PFDN2 RHOC DNAI3 ARPC1B SLAIN2 HIP1R ARPC3 DRG1 ACTN2 ARPC4 SWAP70 RPS3 CEP295 AKAP9 ARPC5 ACTR3 LMOD2 GRB2 RHOA ARHGEF5 CARMIL2 IL20RB GMFB BAG4 MECP2 RAC1 VASP WDR1 WAS GSN PPM1E
0.00153707	37	171	1.98382	Regulation of mitotic cell cycle phase transition	http://amigo.geneontology.org/amigo/term/GO:1901990	CDKN1A SIN3A FBXO31 RCC2 RPA2 TTK INO80 VPS4B ANXA1 MTBP UBE2C PKD1 GEN1 CUL4A XPC TPRA1 CCNB3 DDB1 ANAPC15 TPR CENPF DTL CUL3 ZNF207 TAOK1 RPS27L MEPCE CDK4 ZWINT RPL26 CTDSP2 DACT1 AIF1 MECP2 DBF4B KANK2 ZNF830
0.00155293	14	39	3.29124	Translational elongation	http://amigo.geneontology.org/amigo/term/GO:0006414	EEF1A1 RPLP1 EEF1D TUFM RPLP2 EEF1G EEF1B2 GFM1 SECISBP2 RACK1 TRNAU1AP DPH7 DPH2 EIF5A
0.00155293	21	75	2.56717	Bacterial invasion of epithelial cells	http://www.genome.jp/kegg-bin/show_pathway?ssc05100	PIK3CD WASF2 ACTB ARPC1B CTNNA2 SEPTIN11 ARPC3 ARPC4 HCLS1 SEPTIN8 CBL ARPC5 ACTR3 SEPTIN9 RHOA CLTC ILK RAC1 SHC3 PXN CAV3
0.0016346	82	485	1.55013	Endosome	http://amigo.geneontology.org/amigo/term/GO:0005768	PACSIN2 MON2 SCAMP2 MMP14 ARRDC4 AKAP5 VIPAS39 RIN3 LGMN AP1G1 RCC2 WASF2 LEPROT IGF2R CLVS2 SNX14 SNX3 VPS4B ANXA1 RAB14 RUSC1 ELAPOR1 SNX21 ARFGEF2 GP2 SPAST LAPTM4A THSD1 LAMP1 RAN ANKRD13A CORO1C VPS26A PSAP PRDX3 RAB7A DOP1B UBA1 RNF128 SLC9A6 PKN1 RUFY1 LAMTOR1 VPS11 MR1 ALS2 FZD5 ACKR3 CHMP6 GRB2 PHB EHD4 RHOA CLTC CARMIL2 FLOT1 VPS50 AVL9 CHMP1A SNX17 PRSS16 MFSD12 VPS35 RMC1 VPS35L VPS37…
0.00170126	6	8	6.87635	Oxidoreductase activity, acting on a sulfur group of donors, NAD(P) as acceptor	http://amigo.geneontology.org/amigo/term/GO:0016668	TXNRD1 TXNRD2 DLD GSR NXN TXNDC17
0.00170126	6	8	6.87635	Tat protein binding	http://amigo.geneontology.org/amigo/term/GO:0030957	ACTB SMARCB1 SMARCA4 NPM1 MDFIC DLL1
0.00170126	104	650	1.46695	Enzyme linked receptor protein signaling pathway	http://amigo.geneontology.org/amigo/term/GO:0007167	EP300 ACVRL1 USP15 GPLD1 HSP90AB1 RUNX2 HEXA SIPA1L1 LGMN CDH13 PIK3CD SS18 GAREM1 LEPROT SMOC2 CITED2 CCN2 CD109 RNF165 MYO1E NDN CCBE1 BMP4 JAK2 RAB14 SULF1 SDCBP DDR2 CCN1 FERMT1 NCOA5 CASS4 ATOH8 CRIM1 EMILIN1 LRIT3 SPRY2 HIP1R DKK1 JCAD VIM PIP4K2A RAB7A WWTR1 SKIL HRG OGT IGSF1 GPC3 SLC9A6 FBN2 FZD4 CBL UBASH3B ELAPOR2 ANGPT2 SNX25 ADGRA2 NRG1 ACVR1 ADAMTS12 IL6ST CHMP6 GRB2 SLC9A3R1 STAT3 …
0.00171732	28	116	2.21308	Protein C-terminus binding	http://amigo.geneontology.org/amigo/term/GO:0008022	XRCC6 EP300 SAE1 HSPG2 EPB41 CDC20 VTA1 CCN2 RAD51 VPS4B ERCC4 SLC9A3R2 PRDX3 MED12 CENPF MIF4GD PHB TAF13 CEP250 OPTN KPNA3 SNX17 MAPRE3 YAP1 SASH1 VPS36 SIAH1 CAV3
0.0017175	92	560	1.50625	DOID:9001573 Experimental Liver Cirrhosis	ftp://ftp.rgd.mcw.edu/pub/data_release	ARHGAP9 INHBE PTPRO CDKN1A VEGFA RCN2 PSTPIP1 CYP1A2 ARG2 LGMN FAM167B DOCK7 SMOC2 EPB41L2 NT5E TPM1 SEMA6D BMP4 JAK2 RGS3 DPYS YWHAZ RIDA SNX7 ARPC1B ABCG8 LTBP1 AFM HPGDS SNAP29 ACTA2 HELLS BLOC1S2 MGMT VIM CELF2 SKIL SENP2 CD86 NFKBIZ ACOT9 XPNPEP2 TKFC VAV1 MYO1F TPM4 RMND5B ERAP1 MGAT5 ANGPT2 NRG1 AGFG1 HTR2B ACKR3 SKAP2 ZEB2 REEP5 RHOA PDGFRB ILK NRROS RIT1 COQ10A R3HDM2 SYNRG SLC39A6 YBX1 …
0.00181025	102	636	1.47041	Positive regulation of protein modification process	http://amigo.geneontology.org/amigo/term/GO:0031401	XRCC6 ACVRL1 RIPK1 JARID2 PHF1 CDKN1A HSP90AB1 ARRDC4 HSP90AA1 SAE1 RUVBL2 PARK7 DOCK7 CDC20 MAP3K4 NDN FANCM BMP4 SDCBP DDR2 LMNA CCN1 DLC1 DDRGK1 CASS4 PKD1 SPDYA SPRY2 SEMA4D CLU ERP29 SPPL3 SART3 SMARCB1 DKK1 SENP2 PAK2 HCLS1 PAXBP1 OGT LOC100525798 PRR5L C3 DNMT1 AKAP8 AKAP8L FNIP1 RPS3 FZD4 CEP295 AKAP9 NIBAN1 NRG1 ACVR1 GCG ALS2 FZD5 CUL3 HTR2B ISL1 IL6ST RNF180 NPM1 AXIN2 PHB MMD UNC119 T…
0.00183397	266	1948	1.25196	Cation binding	http://amigo.geneontology.org/amigo/term/GO:0043169	CYP2D25 EP300 APOBEC3B RARG MMP19 CRACR2A DYRK2 TDP2 TRIM26 TRIM15 SNRPC MOCS1 RCN2 MAN2C1 CYP1A2 MMP14 CCNB1IP1 ARG2 ZC3H14 ITPK1 UBR7 CDH13 THAP11 TDRD12 ACP7 IRF2BP1 ZC3H4 CABP5 NUCB1 NR1H2 PARK7 AGMAT FBLIM1 HSPG2 SF3A3 RNF138 ZSWIM5 SMOC2 NT5E RNF165 TRIM69 CAPN3 PLA2G4D CCBE1 CLPX PGM5 ANXA1 ZCCHC7 TRIM32 EGFL7 TRPS1 PDP1 CA2 PEX2 ZFHX4 SULF1 CPA6 COPS5 TRIM55 ARMC1 TCEA1 RXRG CASQ1 SPTA1 S…
0.00189791	31	135	2.10535	Regulation of chromosome organization	http://amigo.geneontology.org/amigo/term/GO:0033044	PPHLN1 MAP3K4 TCP1 TTK TERF1 CCT3 ERCC4 CCT7 CCT4 GEN1 HNRNPU MCM2 NAA10 DKC1 MAP2K7 DNMT1 ANAPC15 TPR MCPH1 CUL3 SSBP1 AXIN2 ZNF207 H3F3B ATM SHCBP1L ZWINT FEN1 SMG1 SFPQ TRIM28
0.00190501	241	1743	1.2677	Response to organic substance	http://amigo.geneontology.org/amigo/term/GO:0010033	EP300 DDX17 TUBA1A ACVRL1 RARG USP15 YBX3 IL17REL RIPK1 JARID2 GPLD1 SRSF3 HSP90AB1 RUNX2 ACSBG1 SIN3A LGMN CDH13 AMFR PDCD5 CEBPA LSM14A RUVBL2 PARK7 PIK3CD GAREM1 CTH LEPROT SMOC2 CITED2 CCN2 CD109 RNF165 RAD51 NDN VPS4B CCBE1 PSMC6 BMP4 JAK2 ANXA1 TRIM32 RAB14 CA2 SULF1 COPS5 SDCBP RXRG ATF6 HDGF CRNN CCN1 FERMT1 DDRGK1 NCOA5 RTF2 VAPB ACTB ARID5A IL1R1 MAP4K3 SRSF7 CRIM1 EMILIN1 SLIT2 USO1 LR…
0.00194062	55	294	1.71519	Translation	https://reactome.org/download/current	RPS18 EIF3K RPS11 EIF3I RPS8 EEF1A1 EIF3J RPS6 MRPS2 EIF3E RPL30 EEF1D PTCD3 RPS3A MRPL43 MRPL39 GSPT2 RPLP2 MRPL11 MRPL49 TRMT112 EEF1G EIF3M RPS28 MRPL4 ETF1 MRPL48 EEF1B2 SRP68 RPL19 RPS21 RPS27L RPL13 GFM1 EIF4H SRP19 RPS17 RPL29 RPL26 RPS7 MRPS14 RPL7 MRPL12 RPS15 RPS2 RPL35 GADD45GIP1 RPL17 RPL23A RPS15A RPL32 RPS25 RPL23 RPL28 RPS24
0.0019507	29	123	2.16167	Regulation of intrinsic apoptotic signaling pathway	http://amigo.geneontology.org/amigo/term/GO:2001242	YBX3 PARK7 TXNDC12 TRIM32 CLU ERP29 SAMD8 SKIL RPS3 ACKR3 SLC9A3R1 UBQLN1 DAPK2 HNRNPK IL20RB URI1 RPL26 RACK1 XBP1 NDUFS3 PLAUR TMEM161A GPX1 BCL2L1 SFPQ SIAH1 HERPUD1 TPT1 DDIT3
0.0019507	170	1168	1.33445	Regulation of catalytic activity	http://amigo.geneontology.org/amigo/term/GO:0050790	XRCC6 PTPRO PPP6R2 CDKN1A HSP90AB1 ARRDC4 AKAP5 SIPA1L1 AHSA1 LGMN HSP90AA1 NQO1 PDCD5 NR1H2 PARK7 RCC2 GRHL3 CEP192 MAPRE2 DOCK7 CDC20 MAP3K4 TCP1 CAPN3 BMP4 TERF1 DDR2 NES RHOC CCN1 DLC1 DDRGK1 RBL1 YWHAB CASS4 CD2BP2 PKD1 ANTXR1 CCT4 SPDYA ELMOD2 RBM26 SPRY2 ARHGEF7 SEMA4D CLU HIP1R DIABLO CORO1C PSAP DKK1 PRKG1 PRDX3 BCCIP MGMT HNRNPU PIP4K2A ABHD5 PRKAR2A MCM2 WWTR1 SLC7A14 PAK2 ARHGAP6 CCNB…
0.0019507	26	105	2.27029	Microtubule cytoskeleton organization involved in mitosis	http://amigo.geneontology.org/amigo/term/GO:1902850	PKHD1 LSM14A NUDC CEP192 CDC20 VPS4B NSFL1C PKD1 SPAST SPRY2 DRG1 BCCIP HNRNPU STAG1 TPR MCPH1 TACC1 ZNF207 RHOA CLTC CHMP1A PIBF1 STMN1 FLNA MECP2 NDE1
0.00208829	87	526	1.51646	Cell Cycle	https://reactome.org/download/current	TUBA1A NUP107 UBE2N TUBB CDKN1A HSP90AB1 NEK9 VRK1 CDT1 CENPT E2F4 TBCB RCC2 NUDC RPA2 CEP192 CABLES1 CDC20 MIS18BP1 PSMC6 POLE3 ODF2 YWHAZ TERF1 LMNA PSMD4 RBL1 YWHAB UBE2C YWHAQ CLIP1 DYNLL1 YWHAH DNA2 ACTR1A MCM2 STAG1 RBBP7 PHF8 DKC1 BANF1 POLA2 PPP2R5B RAPSN LMNB1 ANAPC15 MDM4 AKAP9 PSMC2 ORC5 TPR CENPF MCPH1 GORASP2 BARD1 PSMD1 CEP41 RAD1 NPM1 PSME3 TAOK1 CDC16 CEP250 ERCC6L UBE2V2 OPTN H3F…
0.00212018	84	504	1.52808	Kinase binding	http://amigo.geneontology.org/amigo/term/GO:0019900	ACVRL1 BICD1 CDKN1A HSP90AB1 NEK9 VRK1 HSP90AA1 CEBPA ATF5 PARK7 RCC2 RNF138 MAPRE2 RPS6 CNTLN JAK2 YWHAZ STRIP1 ACTB STX1A TRAP1 PKD1 SPDYA PPP1CB SPRY2 ARHGEF7 TTC28 RYR2 ACTA2 PGAM1 PRDX3 CTBP2 PRKAR2A PAK2 HCLS1 CCNB3 RELA MAP2K7 ELAVL1 CDC37 PKN1 SQSTM1 SLC12A2 VDAC1 CAVIN3 RPS3 TPR PTPN14 ANGPT2 ACVR1 FZD5 ACSL3 IRF5 NPM1 GRB2 STAT3 UBQLN1 CEP250 WWC2 TIRAP PDGFRB KHDRBS1 ILK ARHGEF16 DVL2 …
0.00217824	184	1283	1.31488	Positive regulation of cellular biosynthetic process	http://amigo.geneontology.org/amigo/term/GO:0031328	XRCC6 EP300 DDX17 ACVRL1 RARG DYRK2 RIPK1 TFEB HSP90AB1 RUNX2 BNC1 SIN3A NRL HSP90AA1 CDH13 E2F4 CEBPA RUVBL2 IL4I1 ATF5 NR1H2 PARK7 GRHL3 SS18 SMOC2 MAP3K4 TCP1 CITED2 NCOA7 HDAC2 ICE2 TCF12 CAPN3 INO80 NDN LARP6 BMP4 EIF3E COPS5 RXRG ATF6 CCT3 GLMP CCN1 DDRGK1 TFR2 PKD1 ZC3H8 ATOH8 CCT7 CCT4 MAML3 NAA15 CLU ZNF395 YWHAH SMARCB1 DNA2 ECD CTBP2 HNRNPU VIM SLC38A3 TADA3 NR2C2 XPC WWTR1 MECOM HCLS1…
0.00218108	80	475	1.54416	Protein homodimerization activity	http://amigo.geneontology.org/amigo/term/GO:0042803	PTPRO ABCD2 RIPK1 SNRPC HSP90AB1 HSP90AA1 CDH13 RUVBL2 ACOT7 PARK7 MTHFD1L VPS4B CARNMT1 TERF1 DCLRE1B DPYD VAPB PSPH DPY30 GEN1 SLIT2 HPGDS ABCG2 HIP1R SPPL3 PSAP IDE HIF1AN PIP4K2A ACP3 UBA5 WWTR1 FXR1 QTRT2 PGRMC1 RELA ELAVL1 CAMK2A FZD4 CACYBP TPR CENPF ACVR1 ALS2 BARD1 STK25 FOXP2 NPM1 ACOX1 STAT3 ALDH3A2 CDA ZBTB38 CHMP1A TRIM37 AIMP1 G6PD COQ9 MTUS2 GRHL1 SMCHD1 PAFAH1B3 NDP RACK1 GLIPR2 F…
0.00218108	30	130	2.1158	DOID:9008731 Craniofacial Abnormalities	ftp://ftp.rgd.mcw.edu/pub/data_release	EP300 COL11A2 RUNX2 SIN3A GSC HSPG2 MTHFD1L SETBP1 SALL3 BNC2 TRPS1 LMNA COL11A1 ACTB SPRY2 UFD1 RYK TCOF1 FZD4 FOXP2 SRP68 RHOA TRIM37 ZMPSTE24 DLX6 MECP2 FGF8 FREM1 EYA1 LRP2
0.00218108	64	359	1.63449	Negative regulation of protein modification process	http://amigo.geneontology.org/amigo/term/GO:0031400	PTPRO JARID2 PHF1 CDKN1A SIN3A PARK7 NCOA7 CD109 CAPN3 BMP4 YWHAB EMILIN1 SLIT2 SPRY2 SEMA4D CORO1C SMARCB1 DKK1 PRKAR2A WWTR1 SENP2 OGT LRP5 RELA PRR5L PRMT3 SWAP70 DNMT1 PKN1 SQSTM1 RGS14 RPS3 CHORDC1 UBASH3B NIBAN1 MGAT5 SNX25 DNAJC10 NPM1 CHMP6 GGNBP2 GPS2 UCHL1 TARDBP SLC2A1 PIBF1 WDR5 G6PD TRAF3IP1 IL20RB PBLD KDM4A CEP85 NXN RACK1 PTK6 CTDSP2 PMEPA1 U2AF2 PID1 MFHAS1 PPM1E UBE2B CAV3
0.00218108	118	762	1.41979	Anatomical structure formation involved in morphogenesis	http://amigo.geneontology.org/amigo/term/GO:0048646	EP300 ACVRL1 RARG ACRBP CECR2 TXNRD1 GPLD1 CFL2 MMP14 CCNB1IP1 GSC CDH13 GPI ARHGAP35 PIK3CD GRHL3 WASF2 SMOC2 PNLDC1 MTHFD1L CITED2 CCN2 SPACA1 CD109 TPM1 LEO1 CAPN3 TJP1 CCBE1 BMP4 ANXA1 YWHAZ SULF1 CASQ1 COL11A1 CCN1 PANK2 GTF2I SEMA4C CNNM4 ATOH8 EMILIN1 SLIT2 SPRY2 TNFSF13B ACTN2 DKK1 MYOF NOLC1 SH3PXD2A JCAD NEBL STAB1 SKIL HRG MED12 SRPX2 C3 PKN1 FBN2 TCOF1 LAMB1 PTPN14 ANGPT2 ADGRA2 ACVR1…
0.00224632	38	181	1.92487	Transcription coactivator activity	http://amigo.geneontology.org/amigo/term/GO:0003713	EP300 DDX17 MAK TRIM15 SIN3A PARK7 SS18 CITED2 NCOA7 TRIM32 MAML3 SMARCB1 ACTN2 CTBP2 TADA3 XPC WWTR1 MED14 MED12 SMARCA4 PKN1 BRD8 BCL9L NPM1 PSMC3IP GPS2 NRIP1 WBP2 RRP1B NUCKS1 SNW1 TRIM37 THRAP3 YAP1 TRIM14 SS18L1 TRIM28 RBM4
0.00240834	18	61	2.70545	Apoptosis	https://reactome.org/download/current	RIPK1 H1-3 DHDH OMA1 YWHAZ LMNA YWHAB YWHAQ STK24 DIABLO DYNLL1 YWHAH FAS VIM SATB1 LMNB1 H1-4 PLEC
0.00242057	42	208	1.85132	Mitochondrial inner membrane	http://amigo.geneontology.org/amigo/term/GO:0005743	OMA1 ATP5F1A UQCRC2 TRAP1 LOC100516606 ETFDH CLU COQ5 NDUFB6 SLC25A5 SLC25A22 TIMM44 TIMM29 SFXN1 NDUFA2 RPS3 AGK CHCHD3 NDUFS6 PHB SDHA NDUFV3 ATP5ME COX5A IMMT CYP11A1 LOC100624067 MTG1 NDUFB4 NDUFS3 ATP5MD ATP5PD SLC25A6 ATP5MF ATP5F1C ATP5F1D SHMT2 ATP5PB NDUFA5 STOML2 TYMS TMEM65
0.00242933	75	440	1.56281	Protein kinase binding	http://amigo.geneontology.org/amigo/term/GO:0019901	ACVRL1 BICD1 CDKN1A HSP90AB1 NEK9 VRK1 HSP90AA1 RCC2 RNF138 MAPRE2 RPS6 CNTLN JAK2 YWHAZ STRIP1 ACTB TRAP1 PKD1 SPDYA PPP1CB SPRY2 ARHGEF7 RYR2 ACTA2 PGAM1 PRDX3 CTBP2 PRKAR2A PAK2 HCLS1 CCNB3 RELA MAP2K7 ELAVL1 CDC37 PKN1 SQSTM1 SLC12A2 VDAC1 CAVIN3 RPS3 TPR PTPN14 ANGPT2 ACVR1 FZD5 ACSL3 IRF5 NPM1 GRB2 STAT3 CEP250 TIRAP PDGFRB KHDRBS1 ILK ARHGEF16 DVL2 IL20RB CD28 MAPRE3 RACK1 PTPN11 SASH1 SLC…
0.00245669	56	304	1.68893	Cytoplasmic vesicle membrane	http://amigo.geneontology.org/amigo/term/GO:0030659	PACSIN2 MON2 SCAMP2 CPLX3 AP1G1 RCC2 IGF2R SPACA1 SNX3 VPS4B COPA SEC23B SNX21 STX1A SEMA4C LAPTM4A MFSD10 LAMP1 SPPL3 CORO1C VPS26A SEC24C RAB7A DOP1B UBA1 STX3 SLC12A2 LAMTOR1 ICA1 MR1 CHMP6 CYB561 EHD4 CLTC SYN2 CHMP1A SH3BP5 SNX17 VPS35 RMC1 VPS37B GABRA2 VAMP7 ARCN1 VOPP1 SLC11A2 PMEPA1 RAC1 VPS36 CLN3 SLC48A1 MVB12B RAB5A CEMIP EPN2 SNX6
0.00245669	20	72	2.54679	Positive regulation of histone modification	http://amigo.geneontology.org/amigo/term/GO:0031058	JARID2 PHF1 RUVBL2 LMNA SART3 SMARCB1 PAXBP1 OGT LOC100525798 DNMT1 AKAP8 AKAP8L GCG ISL1 WBP2 CHTOP SNW1 WDR5 MECP2 C7H6orf89
0.0024899	38	182	1.91429	Cellular amino acid metabolic process	http://amigo.geneontology.org/amigo/term/GO:0006520	ARG2 GSTZ1 GPT2 IL4I1 PARK7 CTH PARS2 RARS2 PHGDH KYAT3 PSPH TDO2 MTR DALRD3 NIT2 HSD17B10 FARSA NARS2 ASNS AASS PIPOX TPH2 ATCAY BCAT1 KCNMB3 PYCR3 GOT2 INS LOC110256626 MECP2 CLN3 SDS SHMT2 GCLM AARSD1 DDAH2 FARS2 GCSH
0.0024899	65	368	1.61943	Chromatin binding	http://amigo.geneontology.org/amigo/term/GO:0003682	EP300 RARG SARNP JARID2 H1-3 RUNX2 POLG SIN3A NRL VRK1 E2F4 CEBPA RUVBL2 ATF5 GRHL3 CITED2 RAD51 NDN FANCM TOX GTF2B RBL1 NCOA5 ERCC4 CTBP2 HNRNPU APTX WDR82 STAG1 SKIL PHF8 MED12 LOC100525798 RBMX RELA DNMT1 PKN1 SIN3B TPR SSBP1 ISL1 STAT3 MSH6 WBP2 NUCKS1 TNRC18 TRIM37 CTCF URI1 POU4F2 GRHL1 YBX1 SSRP1 YAP1 MACROH2A2 H1-4 MECP2 SFPQ PBRM1 SHMT2 TRIM28 ATF2 MEIS1 CBX5 DPPA4
0.00252467	175	1215	1.32056	Post-translational protein modification	https://reactome.org/download/current	EP300 DDX17 CKAP4 TUBA1A USP15 NUP107 COPS7A UBE2N RIPK1 GPLD1 SIN3A FBXO9 FBXO31 AMFR TBCB HIF3A SAE1 KDELR1 NUCB1 NR1H2 ETFB RPL22 PARK7 CDC20 FBXL4 SNX3 HDAC2 CD109 EEF1A1 LEO1 SCG3 COPS2 INO80 MDGA2 PSMC6 BMP4 NANS SDC2 UBE2W COPS5 COPA PSMD4 CCN1 POLB UBE2C NEURL2 ACTB GP2 ELOB RNF181 FBXO41 GFPT1 PEX13 CAMKMT LTBP1 MATN3 PDIA6 UBA6 USO1 USP12 THSD1 CUL4A WSB2 FBXO21 DYNLL1 KLHL22 UFD1 SEC24…
0.00252467	29	125	2.12708	DOID:224 transient cerebral ischemia	ftp://ftp.rgd.mcw.edu/pub/data_release	EP300 ACVRL1 SIN3A CEBPA RPS6 JAK2 LMNA LTBP1 ENTPD1 AIFM1 MADD SLC17A6 C3 SLC12A2 CAMK2A CBL GSR TFPI SERPINF1 MAP2K4 NDRG4 OPTN ILK TIA1 G6PD EIF2S1 MECP2 HNRNPA2B1 ATF2
0.0025247	33	150	2.01706	Regulation of protein polymerization	http://amigo.geneontology.org/amigo/term/GO:0032271	HSP90AA1 TMOD2 TMOD4 DNAI3 ARPC1B SLIT2 SLAIN2 HIP1R ARPC3 DRG1 SAMD8 ARPC4 HCLS1 RPS3 AKAP9 ARPC5 ACTR3 LMOD2 GRB2 CARMIL2 IL20RB STMN1 GMFB CAMSAP2 SSH3 CAPZA2 MAPRE3 BAG4 MECP2 RAC1 VASP WAS GSN
0.00256403	107	681	1.44057	Regulation of cellular component movement	http://amigo.geneontology.org/amigo/term/GO:0051270	SUN2 ACVRL1 GPLD1 MMP14 RIN3 LGMN CDH13 CFAP20 GPI PIK3CD PDPN RCC2 MAPRE2 DOCK7 SMOC2 CITED2 ATP5F1A TPM1 SEMA6D CCBE1 BMP4 ANXA1 TRIM32 SULF1 SDCBP DDR2 LMNA RHOC CCN1 DNAI3 DLC1 FERMT1 DDRGK1 MYLK2 CASS4 IL1R1 ATOH8 EMILIN1 SLIT2 DACH1 SPRY2 STK24 LAMP1 SEMA4D CORO1C RYR2 PRKG1 JCAD ARMC4 ELP6 HRG MYLK SRPX2 PRR5L SWAP70 ICAM1 CALR PKN1 CAMK2A ARAP1 ST3GAL4 AKAP9 LAMB1 MGAT5 ANGPT2 ADGRA2 ACVR…
0.00258218	26	107	2.22785	Actin filament bundle organization	http://amigo.geneontology.org/amigo/term/GO:0061572	WASF2 CCN2 TJP1 RHOC DLC1 FHDC1 PAK2 ARHGAP6 PLS3 SWAP70 ARAP1 CUL3 BAIAP2 RHOA PHLDB2 ARHGEF5 STMN1 AIF1 BAG4 CGNL1 RAC1 RFLNA WAS MARCKS ALMS1 PPM1E
0.00260284	100	628	1.45995	Microtubule-based process	http://amigo.geneontology.org/amigo/term/GO:0007017	SUN2 TUBA1A MDM1 BICD1 TUBB SLC26A8 PKHD1 GAS8 CFAP20 LSM14A ATF5 KIF1B KIF17 NUDC MAP7D1 CEP192 SS18 DOCK7 CDC20 CCDC68 INO80 IVD VPS4B CNTLN ODF2 LMNA NSFL1C IFT140 PKD1 GCC2 PEX13 SPAST GEN1 SLAIN2 SPRY2 LAMP1 DNAH10 DYNLL1 DRG1 AP3M1 BLOC1S2 DPCD BCCIP HNRNPU KIF5B ARMC4 STAG1 RGS14 RPS3 CHORDC1 DEUP1 CEP295 HOATZ AKAP9 TPR ACTR3 MCPH1 TACC1 SPEF2 NPM1 SLC9A3R1 ZNF207 TAOK1 CEP250 CHD3 KIF21B…
0.00261336	14	41	3.13069	U2-type precatalytic spliceosome	http://amigo.geneontology.org/amigo/term/GO:0071005	SF3A3 SNRPA1 LSM7 SF3B1 CWC27 EFTUD2 LSM8 SRRM2 SNRPE SNRPG SNRPD2 PHF5A LSM2 MFAP1
0.00270645	31	138	2.05958	Positive regulation of supramolecular fiber organization	http://amigo.geneontology.org/amigo/term/GO:1902905	CFL2 CCN2 RHOC DNAI3 ARPC1B SLAIN2 HIP1R ARPC3 DRG1 ACTN2 ARPC4 SWAP70 RPS3 AKAP9 ARPC5 ACTR3 LMOD2 GRB2 RHOA ARHGEF5 CARMIL2 IL20RB GMFB BAG4 MECP2 RAC1 VASP WDR1 WAS GSN PPM1E
0.00276706	10	23	3.98629	Negative regulation of actin filament bundle assembly	http://amigo.geneontology.org/amigo/term/GO:0032232	WASF2 TJP1 DLC1 PAK2 ARHGAP6 ARAP1 PHLDB2 STMN1 CGNL1 WAS
0.00276902	44	223	1.80902	Establishment of organelle localization	http://amigo.geneontology.org/amigo/term/GO:0051656	SUN2 BICD1 PKHD1 NUDC VPS4B YWHAZ TERF1 CD84 NSFL1C SPAST SPRY2 LAMP1 RAN AP3M1 BLOC1S2 CCDC186 WDR11 HNRNPU KIF5B RAB7A NLGN1 TMED9 CENPF ACTR3 MCPH1 CUL3 STK25 EXOC4 NPM1 CHMP6 SLC9A3R1 MEIOC NTN1 UCHL1 CDH3 CHMP1A PIBF1 ATM VAMP7 SNAPIN CLN3 BLOC1S6 UBE2B NDE1
0.00277331	60	334	1.64703	Histone modification	http://amigo.geneontology.org/amigo/term/GO:0016570	EP300 USP15 JARID2 PHF1 SIN3A MBIP VRK1 RUVBL2 PARK7 HDAC2 LEO1 JAK2 LMNA DPY30 SART3 SMARCB1 SUV39H2 WDR82 TADA3 YEATS2 PAXBP1 PHF8 OGT LOC100525798 TRMT112 DDB1 DOT1L CARM1 DNMT1 PKN1 AKAP8 AKAP8L BRD8 GCG ING3 ISL1 PHB KMT2C WBP2 HIPK4 CHTOP SNW1 TRIM37 CTCF WDR5 ATM KDM4A EP400 DR1 PCGF3 FBL MECP2 C7H6orf89 IWS1 SFPQ JMJD6 RBM4 ATF2 UBE2B EYA1
0.00296665	27	114	2.17148	Regulation of histone modification	http://amigo.geneontology.org/amigo/term/GO:0031056	JARID2 PHF1 SIN3A RUVBL2 PARK7 LMNA SART3 SMARCB1 TADA3 PAXBP1 OGT LOC100525798 DNMT1 AKAP8 AKAP8L GCG ISL1 WBP2 CHTOP SNW1 CTCF WDR5 KDM4A MECP2 C7H6orf89 IWS1 UBE2B
0.00297966	26	108	2.20722	Ribonucleoprotein complex subunit organization	http://amigo.geneontology.org/amigo/term/GO:0071826	SNRPF SNRPC HSP90AB1 HSP90AA1 SF3A3 MDN1 PSIP1 DENR SART3 SNRPD3 KIF5B RPL24 CPSF7 CLNS1A SF3B1 FASTKD2 SRSF1 GCFC2 SNRPE SNRPG USP39 CLP1 SNRPD2 SRSF10 CRNKL1 LSM2
0.00298809	12	32	3.43817	RHO GTPases Activate WASPs and WAVEs	https://reactome.org/download/current	WASF2 ACTB ARPC1B ARPC3 ARPC4 ARPC5 ACTR3 BAIAP2 GRB2 IL20RB RAC1 WAS
0.00316564	254	1867	1.24734	Metal ion binding	http://amigo.geneontology.org/amigo/term/GO:0046872	CYP2D25 EP300 APOBEC3B RARG MMP19 CRACR2A DYRK2 TDP2 TRIM26 TRIM15 SNRPC MOCS1 RCN2 MAN2C1 CYP1A2 MMP14 CCNB1IP1 ARG2 ZC3H14 ITPK1 UBR7 CDH13 THAP11 TDRD12 ACP7 IRF2BP1 ZC3H4 CABP5 NUCB1 NR1H2 PARK7 AGMAT FBLIM1 HSPG2 SF3A3 RNF138 ZSWIM5 SMOC2 NT5E RNF165 TRIM69 CAPN3 PLA2G4D CCBE1 CLPX PGM5 ANXA1 ZCCHC7 TRIM32 EGFL7 TRPS1 CA2 PEX2 ZFHX4 SULF1 CPA6 COPS5 TRIM55 ARMC1 TCEA1 RXRG CASQ1 SPTA1 S100A2…
0.00338321	227	1646	1.26442	Carbohydrate derivative binding	http://amigo.geneontology.org/amigo/term/GO:0097367	DDX17 TUBA1A ACVRL1 ATP5F1B MYO1A TMEM19 STYK1 CRACR2A ABCD2 DYRK2 PRPF4B RIPK1 MAK TUBB SKIV2L VEGFA HSP90AB1 RUNX2 ARHGAP5 NEK9 ITPK1 VRK1 HSP90AA1 ATP2C2 DNAJA2 TDRD12 PDCD5 ARHGAP35 DHX34 RUVBL2 ACOT7 KIF1B KIF17 PARS2 MAP3K4 TCP1 MTHFD1L HBS1L CCN2 RARS2 MDN1 ASCC3 TTK EEF1A1 ATP5F1A MYO1E INO80 RAD51 VPS4B CLPX FANCM PSMC6 BMP4 JAK2 TNC RAB14 UCK1 NDOR1 RSPO2 SDCBP DDR2 BCAN CCT3 PGLYRP4 RH…
0.00347089	26	109	2.18697	Alpha-amino acid metabolic process	http://amigo.geneontology.org/amigo/term/GO:1901605	ARG2 GPT2 IL4I1 PARK7 CTH PHGDH KYAT3 PSPH TDO2 MTR NIT2 HSD17B10 ASNS AASS PIPOX ATCAY PYCR3 GOT2 LOC110256626 MECP2 CLN3 SDS SHMT2 GCLM DDAH2 GCSH
0.00347166	25	103	2.22535	Ribonucleoprotein complex assembly	http://amigo.geneontology.org/amigo/term/GO:0022618	SNRPF SNRPC HSP90AB1 HSP90AA1 SF3A3 MDN1 PSIP1 DENR SART3 SNRPD3 RPL24 CPSF7 CLNS1A SF3B1 FASTKD2 SRSF1 GCFC2 SNRPE SNRPG USP39 CLP1 SNRPD2 SRSF10 CRNKL1 LSM2
0.00354773	124	819	1.38814	RNA Polymerase II Transcription	https://reactome.org/download/current	EP300 RARG SARNP SNRPF DYRK2 DEK SRSF3 CDKN1A RUNX2 SIN3A PPP1R13B E2F4 ZNF382 ZNF568 NR1H2 ZNF582 INTS11 TAF4B ZNF671 ARID1B CITED2 MED23 CCNC CDC40 HDAC2 ICE2 TCF12 LEO1 INTS14 SNAPC3 TXN YWHAZ TCEA1 RXRG RPAP2 GTF2B RBL1 YWHAB RNPS1 ELOB ZC3H8 CNOT11 SRSF7 DPY30 YWHAQ MAML3 CDK8 NCOR2 YWHAH SNRPD3 SMARCB1 CSTF2T CTSL NR2C2 WWTR1 SKIL RBBP7 MED14 ZNF157 MED12 THOC2 PRDX5 CPSF7 GTF2H1 TEAD1 SMAR…
0.00354773	39	192	1.86234	Protein polymerization	http://amigo.geneontology.org/amigo/term/GO:0051258	HSP90AA1 CEP192 TMOD2 CASQ1 TMOD4 DNAI3 UBE2C ARPC1B SLIT2 SLAIN2 HIP1R ARPC3 DRG1 SAMD8 ARPC4 HCLS1 RPS3 AKAP9 ARPC5 ACTR3 LMOD2 GRB2 CARMIL2 IL20RB STMN1 GMFB CAMSAP2 SSH3 CAPZA2 MAPRE3 AIF1 UBE2K BAG4 MECP2 RAC1 VASP WAS GSN NDE1
0.00374763	29	128	2.07723	Positive regulation of binding	http://amigo.geneontology.org/amigo/term/GO:0051099	EP300 AMFR PARK7 EPB41 LARP6 BMP4 EIF3E SPTA1 GTF2B DDRGK1 PKD1 ARHGEF7 RAN HIP1R SPPL3 IDE CTBP2 GCG PLCL1 ISL1 FLOT1 STMN1 NVL MAPRE3 DACT1 PLAUR TRIM28 PIN1 RFNG
0.00380374	109	704	1.41955	Regulation of protein phosphorylation	http://amigo.geneontology.org/amigo/term/GO:0001932	XRCC6 ACVRL1 PTPRO RIPK1 CDKN1A HSP90AB1 CCDC88C HSP90AA1 PARK7 DOCK7 MAP3K4 CD109 RAD51 BMP4 SDCBP DDR2 CCN1 DDRGK1 CASS4 PKD1 SPDYA EMILIN1 SLIT2 SPRY2 SEMA4D CLU ERP29 CORO1C DKK1 BCCIP PRKAR2A TADA3 WWTR1 HRG PAK2 HCLS1 CCNB3 CCNQ LRP5 PRR5L C3 CDC37 PKN1 AKAP8 AKAP8L RGS14 FNIP1 RPS3 FZD4 CHORDC1 UBASH3B AKAP9 NIBAN1 SNX25 NRG1 ACVR1 GCG DNAJC10 PLCL1 ALS2 FZD5 HTR2B ISL1 IL6ST NPM1 CHMP6 SL…
0.00380374	88	544	1.48313	Organelle assembly	http://amigo.geneontology.org/amigo/term/GO:0070925	MDM1 ACRBP MAK TUBB PKHD1 CFL2 GAS8 CENPT E2F4 CFAP20 LSM14A ARHGAP35 UBXN10 CEP192 CDC20 SPACA1 MDN1 TPM1 CAPN3 INO80 VPS4B MRPS2 SDCBP CASQ1 UBAP2L ELAPOR1 IFT140 PUM2 FHDC1 NEK1 DRG1 SNAP29 ACTN2 ABLIM1 BCCIP HNRNPU ARMC4 PIP4K2A NEBL RAB7A STAG1 WWTR1 EIF2A NLGN1 RPL24 RPS3 DEUP1 CEP295 HOATZ TPR ACTR3 GORASP2 FASTKD2 CEP41 LMOD2 DBNL SPEF2 NPM1 SEPTIN9 ZNF207 RAB34 PHF23 UBQLN1 CEP250 TAPT1 …
0.00382323	34	160	1.9483	Negative regulation of apoptotic signaling pathway	http://amigo.geneontology.org/amigo/term/GO:2001234	YBX3 RIPK1 PARK7 CTH TXNDC12 BMP4 TRIM32 LMNA CLU SAMD8 SLC25A5 RELA ICAM1 PRDX2 NANOS3 ACVR1 ACKR3 PSME3 AATF SERPINE1 URI1 XBP1 YAP1 NDUFS3 PEA15 PLAUR TMEM161A GPX1 BCL2L1 GCLM HMOX1 HERPUD1 EYA1 TPT1
0.00382323	17	58	2.68731	Sm-like protein family complex	http://amigo.geneontology.org/amigo/term/GO:0120114	SNRPC SF3A3 CD2BP2 SART3 LSM7 CLNS1A SF3B1 EFTUD2 LSM8 SNRPE MEPCE SNRNP70 SNRPG USP39 SNRPD2 PHF5A LSM2
0.00382323	17	58	2.68731	MRNA 3 -UTR binding	http://amigo.geneontology.org/amigo/term/GO:0003730	YBX3 SERBP1 RNPS1 PUM2 AUH HNRNPU IGF2BP2 ELAVL1 ANGEL2 TARDBP IGF2BP1 TIA1 RSL1D1 CARHSP1 SECISBP2 DDX5 IGF2BP3
0.0039485	62	353	1.61032	Mitochondrial envelope	http://amigo.geneontology.org/amigo/term/GO:0005740	SLC25A27 ACADM OMA1 FBXL4 ATP5F1A ARMC1 PANK2 UQCRC2 TRAP1 COX5B LOC100516606 ETFDH CLU COQ5 SAMD8 NDUFB6 TIMM8A SLC25A5 PGRMC1 AIFM1 SLC25A22 CPT1A TIMM44 TIMM29 SFXN1 VDAC1 NDUFA2 COA4 RPS3 AGK CHCHD3 NLN BNIP1 NDUFS6 FKBP10 PHB SDHA NDUFV3 ATP5ME COX5A IMMT CYP11A1 ATCAY LOC100624067 MTG1 NDUFB4 NDUFS3 ATP5MD ATP5PD SLC25A11 SLC25A6 ATP5MF ATP5F1C BCL2L1 ATP5F1D SHMT2 ATP5PB NDUFA5 ATF2 STOML2…
0.00431297	15	48	2.86514	Cysteine and methionine metabolism	http://www.genome.jp/kegg-bin/show_pathway?ssc00270	IL4I1 AMD1 MTAP PHGDH KYAT3 MTR LDHA DNMT1 AHCYL2 MAT2A MDH1 BCAT1 GOT2 SDS GCLM
0.00431297	184	1302	1.2957	Positive regulation of biosynthetic process	http://amigo.geneontology.org/amigo/term/GO:0009891	XRCC6 EP300 DDX17 ACVRL1 RARG DYRK2 RIPK1 TFEB HSP90AB1 RUNX2 BNC1 SIN3A NRL HSP90AA1 CDH13 E2F4 CEBPA RUVBL2 IL4I1 ATF5 NR1H2 PARK7 GRHL3 SS18 SMOC2 MAP3K4 TCP1 CITED2 NCOA7 HDAC2 ICE2 TCF12 CAPN3 INO80 NDN LARP6 BMP4 EIF3E COPS5 RXRG ATF6 CCT3 GLMP CCN1 DDRGK1 TFR2 PKD1 ZC3H8 ATOH8 CCT7 CCT4 MAML3 NAA15 CLU ZNF395 YWHAH SMARCB1 DNA2 ECD CTBP2 HNRNPU VIM SLC38A3 TADA3 NR2C2 XPC WWTR1 MECOM HCLS1…
0.00431297	18	64	2.57863	Regulation of stress fiber assembly	http://amigo.geneontology.org/amigo/term/GO:0051492	WASF2 CCN2 TJP1 RHOC DLC1 PAK2 ARHGAP6 ARAP1 RHOA PHLDB2 ARHGEF5 STMN1 BAG4 CGNL1 RAC1 WAS ALMS1 PPM1E
0.00436019	60	340	1.61796	Negative regulation of phosphorus metabolic process	http://amigo.geneontology.org/amigo/term/GO:0010563	PTPRO CDKN1A PARK7 CEP192 CD109 BMP4 YWHAB CD2BP2 EMILIN1 SLIT2 RBM26 SPRY2 SEMA4D DYNLL1 CORO1C DKK1 PRDX3 HNRNPU PIP4K2A PRKAR2A WWTR1 SLC7A14 LRP5 PRR5L SWAP70 PKN1 RGS14 CHORDC1 UBASH3B NIBAN1 MGAT5 SNX25 DNAJC10 NPM1 CHMP6 STAT3 GGNBP2 CDA RRP1B UCHL1 TARDBP PIBF1 TRAF3IP1 IL20RB PBLD URI1 CEP85 FARP1 RACK1 LMTK3 PTK6 CTDSP2 PMEPA1 BAG4 PID1 MFHAS1 CSRNP2 PPM1E UBE2B CAV3
0.00436019	60	340	1.61796	Negative regulation of phosphate metabolic process	http://amigo.geneontology.org/amigo/term/GO:0045936	PTPRO CDKN1A PARK7 CEP192 CD109 BMP4 YWHAB CD2BP2 EMILIN1 SLIT2 RBM26 SPRY2 SEMA4D DYNLL1 CORO1C DKK1 PRDX3 HNRNPU PIP4K2A PRKAR2A WWTR1 SLC7A14 LRP5 PRR5L SWAP70 PKN1 RGS14 CHORDC1 UBASH3B NIBAN1 MGAT5 SNX25 DNAJC10 NPM1 CHMP6 STAT3 GGNBP2 CDA RRP1B UCHL1 TARDBP PIBF1 TRAF3IP1 IL20RB PBLD URI1 CEP85 FARP1 RACK1 LMTK3 PTK6 CTDSP2 PMEPA1 BAG4 PID1 MFHAS1 CSRNP2 PPM1E UBE2B CAV3
0.00461749	23	93	2.26747	Positive regulation of protein polymerization	http://amigo.geneontology.org/amigo/term/GO:0032273	HSP90AA1 DNAI3 ARPC1B SLAIN2 HIP1R ARPC3 DRG1 ARPC4 RPS3 AKAP9 ARPC5 ACTR3 LMOD2 GRB2 CARMIL2 IL20RB GMFB BAG4 MECP2 RAC1 VASP WAS GSN
0.00461749	25	105	2.18297	Actin filament bundle assembly	http://amigo.geneontology.org/amigo/term/GO:0051017	WASF2 CCN2 TJP1 RHOC DLC1 FHDC1 PAK2 ARHGAP6 PLS3 SWAP70 ARAP1 CUL3 BAIAP2 RHOA PHLDB2 ARHGEF5 STMN1 AIF1 BAG4 CGNL1 RAC1 WAS MARCKS ALMS1 PPM1E
0.00466659	19	70	2.48858	Positive regulation of protein binding	http://amigo.geneontology.org/amigo/term/GO:0032092	EP300 AMFR EPB41 BMP4 SPTA1 PKD1 ARHGEF7 RAN HIP1R SPPL3 IDE GCG PLCL1 FLOT1 NVL MAPRE3 DACT1 PIN1 RFNG
0.00466659	19	70	2.48858	Regulation of actomyosin structure organization	http://amigo.geneontology.org/amigo/term/GO:0110020	WASF2 CCN2 TJP1 RHOC DLC1 PAK2 ARHGAP6 ARAP1 RHOA PHLDB2 ARHGEF5 STMN1 BAG4 CGNL1 RAC1 WAS ALMS1 PPM1E CAV3
0.00468216	17	59	2.64176	Biological process involved in interaction with symbiont	http://amigo.geneontology.org/amigo/term/GO:0051702	EP300 IGF2R SMARCB1 HRG PC DDB1 RAPSN SMARCA4 PHB RRP1B NUCKS1 SNW1 TARDBP GPX1 TBC1D20 STOM APCS
0.00475331	39	195	1.83369	Mitotic nuclear division	http://amigo.geneontology.org/amigo/term/GO:0140014	LSM14A NUDC CEP192 CDC20 TTK INO80 VPS4B BMP4 MTBP NSFL1C UBE2C SPAST GEN1 RAN DRG1 BCCIP HNRNPU STAG1 NAA50 RPL24 NAA10 LRP5 AKAP8 AKAP8L ANAPC15 TPR CUL3 CHMP6 ZNF207 RHOA CHMP1A PIBF1 CEP85 ZWINT CD28 FLNA INS FGF8 RANBP1
0.00476492	198	1419	1.27932	Purine ribonucleoside triphosphate binding	http://amigo.geneontology.org/amigo/term/GO:0035639	DDX17 TUBA1A ACVRL1 ATP5F1B MYO1A TMEM19 STYK1 CRACR2A ABCD2 DYRK2 PRPF4B RIPK1 MAK TUBB SKIV2L HSP90AB1 RUNX2 ARHGAP5 NEK9 ITPK1 VRK1 HSP90AA1 ATP2C2 DNAJA2 TDRD12 ARHGAP35 DHX34 RUVBL2 KIF1B KIF17 PARS2 MAP3K4 TCP1 MTHFD1L HBS1L RARS2 MDN1 ASCC3 TTK EEF1A1 ATP5F1A MYO1E INO80 RAD51 VPS4B CLPX FANCM PSMC6 JAK2 RAB14 UCK1 DDR2 CCT3 RHOC GNAT2 ABCA4 PANK2 MYLK2 TUFM TRAP1 CCT7 CCT4 ABCG8 MAP4K3 SP…
0.0048476	94	594	1.4509	Negative regulation of transcription by RNA polymerase II	http://amigo.geneontology.org/amigo/term/GO:0000122	EP300 RARG SARNP YBX3 JARID2 SIN3A GSC THAP11 CEBPA ZBTB32 IRF2BP1 NR1H2 CC2D1B ZBTB2 CITED2 HDAC2 NDN BMP4 ZHX1 TRPS1 PEX2 HDGF RBL1 MAFK ZC3H8 ARID5A DACH1 SEMA4D NCOR2 DKK1 HIF1AN BAG3 HNRNPU SUV39H2 SATB1 NR2C2 WWTR1 SKIL YEATS2 HCLS1 RBBP7 RELA DNMT1 CALR GATAD2A SQSTM1 FNIP1 MDM4 TPR MCPH1 CUL3 ISL1 HOXB4 PHB GPS2 NRIP1 ZEB2 CHD3 WWC2 SNW1 LMO1 KHDRBS1 MEPCE TRIM37 CTCF IL20RB URI1 POU4F2 B…
0.00491296	20	76	2.41275	Contractile actin filament bundle assembly	http://amigo.geneontology.org/amigo/term/GO:0030038	WASF2 CCN2 TJP1 RHOC DLC1 FHDC1 PAK2 ARHGAP6 ARAP1 CUL3 RHOA PHLDB2 ARHGEF5 STMN1 BAG4 CGNL1 RAC1 WAS ALMS1 PPM1E
0.00491296	20	76	2.41275	Stress fiber assembly	http://amigo.geneontology.org/amigo/term/GO:0043149	WASF2 CCN2 TJP1 RHOC DLC1 FHDC1 PAK2 ARHGAP6 ARAP1 CUL3 RHOA PHLDB2 ARHGEF5 STMN1 BAG4 CGNL1 RAC1 WAS ALMS1 PPM1E
0.00492343	230	1683	1.25297	Cell surface receptor signaling pathway	http://amigo.geneontology.org/amigo/term/GO:0007166	EP300 ACVRL1 TESPA1 USP15 PTPRO DYRK2 IL17REL RIPK1 GPLD1 DAAM2 HSP90AB1 RUNX2 HEXA SIPA1L1 CCDC88C LGMN GSC CDH13 AMFR CEBPA LSM14A RUVBL2 PARK7 PIK3CD DRAXIN RCC2 GRHL3 SS18 GAREM1 ADGRL2 LEPROT SMOC2 ADGRG6 CITED2 CCN2 SNX3 CD109 RNF165 MYO1E NDN CCBE1 BMP4 JAK2 TRIM32 RAB14 ADGRD2 EGFL7 RSPO2 SULF1 SDCBP DDR2 LMNA CCN1 FERMT1 NCOA5 CASS4 STX1A IFT140 PKD1 TEDC2 IL1R1 SEMA4C ATOH8 CRIM1 EMILIN…
0.00496002	181	1282	1.29446	Cell development	http://amigo.geneontology.org/amigo/term/GO:0048468	EP300 RARG PTPRO ACRBP CECR2 TDP2 SLC26A8 DAAM2 HSP90AB1 RUNX2 BNC1 SIN3A HEXA CFL2 NRL CCNB1IP1 SIPA1L1 CCDC88C E2F4 CEBPA ARHGAP35 ATF5 DRAXIN RCC2 WASF2 PABPC4 DOCK7 CITED2 RIMS1 SPACA1 RNF165 TPM1 MYO1E CAPN3 NDN BMP4 RPS6 TNC TRIM32 YWHAZ SULF1 TOX CASQ1 IGSF9 CRABP2 LMNA PHGDH GNAT2 SYPL2 COL11A1 PANK2 CASS4 IFT140 ANTXR1 DPYSL5 SLIT2 UBA6 STK24 SEMA4D CLU CORO1C YWHAH ACTN2 PRKG1 ACTA2 LGI…
0.00526923	32	150	1.95594	Regulation of protein binding	http://amigo.geneontology.org/amigo/term/GO:0043393	EP300 CDKN1A AMFR PARK7 EPB41 BMP4 SPTA1 NES ACTB PKD1 ARHGEF7 RAN HIP1R SPPL3 DKK1 IDE EFHB UBASH3B GCG PLCL1 CDON FLOT1 CRMP1 NVL MAPRE3 RACK1 DACT1 TLE5 SNAPIN PSME3IP1 PIN1 RFNG
0.00526923	32	150	1.95594	Biological process involved in symbiotic interaction	http://amigo.geneontology.org/amigo/term/GO:0044403	EP300 TRIM26 TRIM15 HSP90AB1 IGF2R TCP1 SNX3 VPS4B TRIM32 VAPB SMARCB1 RAB7A HRG THOC2 PC DDB1 RAPSN SMARCA4 ICAM1 PHB RRP1B NUCKS1 SNW1 TARDBP CTSB VPS37B GPX1 BCL2L1 TBC1D20 STOM APCS TRIM28
0.00536733	12	34	3.23593	Polysome	http://amigo.geneontology.org/amigo/term/GO:0005844	LARP6 RPS6 DRG1 NAA35 VIM FXR1 RPL24 RPS28 CALR RPS3 RPS21 RPL32
0.00537814	52	286	1.66699	DOID:10652 Alzheimer's disease	ftp://ftp.rgd.mcw.edu/pub/data_release	EP300 HNRNPA1 VEGFA AKAP5 AMFR CEBPA PHACTR2 HDAC2 BMP4 JAK2 CRH BCAN CASS4 TDO2 CLU IDE VIM CALML5 MCM2 TMPRSS15 MRPL39 HSD17B10 AIFM1 KCNC1 C3 HSPA9 NDUFA2 CAMK2A MDM4 NRG1 GSR GCG IL6ST BAIAP2 SERPINF1 NTN1 NRIP1 BRIP1 TARDBP SNRNP70 ATM AIF1 EIF2S1 BPTF INS BCL2L1 ATP5F1D HNRNPA2B1 NDUFA5 ATF2 AKT1 KLK6
0.00539651	50	272	1.68538	Peptidyl-lysine modification	http://amigo.geneontology.org/amigo/term/GO:0018205	EP300 JARID2 PHF1 SIN3A MBIP VIPAS39 SAE1 RUVBL2 PARK7 CTH CAPN3 LMNA STX1A CAMKMT DPY30 SMARCB1 SUV39H2 WDR82 TADA3 YEATS2 SENP2 OGT LOC100525798 RELA TRMT112 DOT1L DNMT1 BRD8 GCG ING3 ISL1 SUMO2 FKBP10 P3H4 KMT2C WBP2 TRPM4 SNW1 CTCF WDR5 KDM4A EP400 DR1 MECP2 IWS1 JMJD6 TRIM28 ATF2 GCSH EYA1
0.00546132	174	1228	1.29911	Positive regulation of macromolecule biosynthetic process	http://amigo.geneontology.org/amigo/term/GO:0010557	XRCC6 EP300 DDX17 ACVRL1 RARG DYRK2 RIPK1 TFEB HSP90AB1 RUNX2 BNC1 SIN3A NRL HSP90AA1 CDH13 E2F4 CEBPA RUVBL2 IL4I1 ATF5 NR1H2 PARK7 GRHL3 SS18 SMOC2 MAP3K4 TCP1 CITED2 NCOA7 HDAC2 ICE2 TCF12 CAPN3 INO80 NDN LARP6 BMP4 EIF3E COPS5 RXRG ATF6 CCT3 GLMP CCN1 DDRGK1 TFR2 PKD1 ZC3H8 ATOH8 CCT7 CCT4 MAML3 NAA15 ZNF395 YWHAH SMARCB1 DNA2 ECD CTBP2 HNRNPU VIM SLC38A3 TADA3 NR2C2 XPC WWTR1 MECOM HCLS1 PAX…
0.005482	14	44	2.91724	Ribosome binding	http://amigo.geneontology.org/amigo/term/GO:0043022	EIF3K SERBP1 NAA15 EIF2A NAA10 PRMT3 SRP68 EIF6 SRP19 RACK1 EIF2S1 EIF5A SEC61B YTHDF1
0.005482	66	387	1.56361	Localization within membrane	http://amigo.geneontology.org/amigo/term/GO:0051668	MMP14 AKAP5 GPHN HSP90AA1 ATP2C2 CDH13 PDCD5 CAPN3 FRMPD1 RAB14 ARFGEF2 ACTB PPIL2 ACTN2 VPS26A PSAP LGI1 KIF5B GRIP2 RAB7A NLGN1 STX3 SGTA TIMM29 SQSTM1 SRPRA CCDC93 GORASP2 ACSL3 AGK SRP68 SLC9A3R1 STAC2 ITGA3 RAB34 EHD4 MESD NDRG4 CLTC FLOT1 VPS50 OPTN ARHGEF16 SNX17 SRP19 VPS35 EMC7 VPS35L COLQ SEC62 GRIN3B RACK1 SSR3 HGS FLNA INS BAG4 PID1 RAC1 BCL2L1 CLN3 STOM CEMIP PALM CAV3 RALA
0.005684	10	25	3.66738	U2-type catalytic step 2 spliceosome	http://amigo.geneontology.org/amigo/term/GO:0071007	CDC40 SNRPA1 CWC15 EFTUD2 SNW1 SRRM2 SNRPE SNRPG SNRPD2 CRNKL1
0.00595625	37	184	1.84366	DOID:5844 myocardial infarction	ftp://ftp.rgd.mcw.edu/pub/data_release	VEGFA MMP14 JAK2 TNC POSTN CLU SAMD8 ACTA2 BRINP3 ITIH4 DGKZ LDHA C3 SLC27A6 VDAC1 CACYBP ANGPT2 NRG1 GSR TFPI NPM1 ITGA3 NRIP1 CTSB AIMP1 G6PD ATM YBX1 PLAUR BCL2L1 ATP5F1D GCLM RANBP1 AKT1 APOH TNNI3 DDIT3
0.00609459	24	101	2.17864	Ribonucleoprotein complex binding	http://amigo.geneontology.org/amigo/term/GO:0043021	YBX3 EIF3K SERBP1 CD2BP2 PTCD3 NAA15 HNRNPU EIF2A NAA10 PRMT3 SRPRA SND1 NPM1 SRP68 EIF6 SRP19 NVL SECISBP2 RACK1 DDX5 EIF2S1 EIF5A SEC61B YTHDF1
0.00610239	189	1353	1.28074	Movement of cell or subcellular component	http://amigo.geneontology.org/amigo/term/GO:0006928	SUN2 ACVRL1 BICD1 PTPRO GPLD1 SLC26A8 MMP14 CCDC88C RIN3 LGMN GAS8 CDH13 CFAP20 GPI ARHGAP35 PIK3CD KIF1B DRAXIN PDPN RCC2 KIF17 WASF2 CAP1 MAPRE2 DOCK7 SMOC2 CITED2 CCN2 ATP5F1A RNF165 TPM1 SEMA6D NDN CCBE1 BMP4 ANXA1 TRIM32 SULF1 TRIM55 SDCBP DDR2 IGSF9 LMNA RHOC CCN1 SYDE2 DNAI3 DLC1 FERMT1 DDRGK1 MYLK2 CASS4 ACTB IFT140 IL1R1 SEMA4C ATOH8 PEX13 SPAST EMILIN1 DPYSL5 LRATD1 SLIT2 DACH1 SPRY2 ST…
0.00613927	16	55	2.66719	MRNA 3'-end processing	https://reactome.org/download/current	SARNP SRSF3 CDC40 RNPS1 SRSF7 CSTF2T THOC2 CPSF7 SRSF1 CHTOP NCBP2 ZC3H11A RBM8A CLP1 ALYREF U2AF2
0.00658946	19	72	2.41946	Regulation of actin filament bundle assembly	http://amigo.geneontology.org/amigo/term/GO:0032231	WASF2 CCN2 TJP1 RHOC DLC1 PAK2 ARHGAP6 SWAP70 ARAP1 RHOA PHLDB2 ARHGEF5 STMN1 BAG4 CGNL1 RAC1 WAS ALMS1 PPM1E
0.00667371	8	17	4.31457	Negative regulation of RNA splicing	http://amigo.geneontology.org/amigo/term/GO:0033119	RBM42 RNPS1 SRSF7 NPM1 HNRNPK U2AF2 C1QBP SRSF10
0.00680995	52	289	1.64969	Nuclear division	http://amigo.geneontology.org/amigo/term/GO:0000280	CCNB1IP1 LSM14A NUDC CEP192 CDC20 TTK INO80 VPS4B FANCM BMP4 MTBP TERF1 NSFL1C UBE2C SPAST GEN1 RAN DRG1 BCCIP HNRNPU STAG1 NAA50 RPL24 NAA10 LRP5 CALR AKAP8 AKAP8L ANAPC15 TPR ACTR3 CUL3 RAD1 CHMP6 MEIOC PSMC3IP ZNF207 BRIP1 RHOA CHMP1A PIBF1 ATM RNF212B CEP85 ZWINT CD28 FLNA INS FGF8 RANBP1 UBE2B FOXJ2
0.00685437	17	61	2.55515	PW:0000546 mRNA decay pathway	ftp://ftp.rgd.mcw.edu/pub/data_release	ACIN1 PABPC4 HBS1L RNPS1 PAPOLG PPP2R2A CSTF2T GSPT2 PPP2R5B CPSF7 DAZAP1 ETF1 UPF3A NCBP2 RBM8A CLP1 SMG1
0.00685437	45	240	1.71909	Mitotic cell cycle phase transition	http://amigo.geneontology.org/amigo/term/GO:0044772	CDKN1A SIN3A FBXO31 E2F4 RCC2 RPA2 TTK INO80 VPS4B RPS6 ANXA1 MTBP NES UBE2C PKD1 SPAST SPDYA GEN1 CUL4A XPC TPRA1 RPL24 CCNB3 PHF8 DDB1 ANAPC15 TPR CENPF DTL ACVR1 CUL3 ZNF207 TAOK1 RPS27L MEPCE CDK4 ZWINT RPL26 CTDSP2 DACT1 AIF1 MECP2 DBF4B KANK2 ZNF830
0.00691348	14	45	2.85241	Precatalytic spliceosome	http://amigo.geneontology.org/amigo/term/GO:0071011	SF3A3 SNRPA1 LSM7 SF3B1 CWC27 EFTUD2 LSM8 SRRM2 SNRPE SNRPG SNRPD2 PHF5A LSM2 MFAP1
0.00691348	14	45	2.85241	Modulation by host of symbiont process	http://amigo.geneontology.org/amigo/term/GO:0051851	EP300 IGF2R SMARCB1 PC RAPSN SMARCA4 PHB RRP1B NUCKS1 SNW1 TARDBP TBC1D20 STOM APCS
0.00691348	70	420	1.52808	Membrane organization	http://amigo.geneontology.org/amigo/term/GO:0061024	PACSIN2 SUN2 PARP11 MFGE8 CPLX3 GPHN HSP90AA1 PDCD5 OMA1 SNX3 VPS4B ANXA1 SPATA46 SPTA1 LMNA SYPL2 ABCA4 SEC23B VAPB SPAST USO1 CLU HIP1R CORO1C SEC24C SAMD8 CEP55 BLOC1S2 KCNIP2 PIP4K2A RAB7A NLGN1 SLC25A5 SGTA C3 TIMM29 AKAP8L TMED9 CUL3 AGK CHCHD3 SPAM1 BNIP1 CHMP6 BAIAP2 SLC9A3R1 RAB34 MESD RHOA FLOT1 TARDBP CHMP1A IMMT EMC7 ATP5IF1 COLQ VAMP7 GRIN3B ATP13A2 AIF1 HGS SNAPIN BCL2L1 TBC1D20 CLN…
0.00702231	181	1292	1.28444	Positive regulation of nucleobase-containing compound metabolic process	http://amigo.geneontology.org/amigo/term/GO:0045935	XRCC6 EP300 DDX17 ACVRL1 RARG RIPK1 TFEB HSP90AB1 RUNX2 BNC1 SIN3A NRL HSP90AA1 CDH13 E2F4 CEBPA RUVBL2 IL4I1 ATF5 NR1H2 PARK7 GRHL3 SS18 SMOC2 MAP3K4 PNLDC1 TCP1 CITED2 NCOA7 HDAC2 ICE2 TCF12 LEO1 CAPN3 INO80 RAD51 NDN BMP4 EXOSC3 RIDA COPS5 TOX RXRG ATF6 CCT3 GLMP CCN1 DDRGK1 TFR2 PKD1 ZC3H8 ATOH8 CCT7 CCT4 MAML3 NAA15 ZNF395 YWHAH SMARCB1 ECD CTBP2 MGMT HNRNPU SLC38A3 TADA3 NR2C2 XPC WWTR1 MEC…
0.00730129	52	290	1.644	Ameboidal-type cell migration	http://amigo.geneontology.org/amigo/term/GO:0001667	ACVRL1 GPLD1 LGMN CDH13 GPI PIK3CD RCC2 WASF2 CAP1 MAPRE2 SMOC2 ATP5F1A CCBE1 BMP4 ANXA1 DDR2 FERMT1 ATOH8 SLIT2 CORO1C JCAD HRG SRPX2 LRP5 PRR5L CALR PKN1 ANGPT2 ADGRA2 ACVR1 HTR2B ISL1 ITGB4 RHOA ILK CLEC14A PBLD TNS1 PTPN11 GLIPR2 SASH1 GPX1 BAG4 MECP2 C1QBP RAC1 FGF8 CLN3 ARSB KANK2 HMOX1 APOH
0.00733592	27	121	2.04586	Regulation of actin polymerization or depolymerization	http://amigo.geneontology.org/amigo/term/GO:0008064	CFL2 ARHGAP35 TMOD2 TMOD4 DNAI3 ARPC1B SLIT2 HIP1R ARPC3 ACTN2 ARPC4 HCLS1 SWAP70 ARPC5 ACTR3 LMOD2 GRB2 CARMIL2 IL20RB GMFB SSH3 CAPZA2 BAG4 VASP WDR1 WAS GSN
0.00733592	27	121	2.04586	Regulation of actin filament length	http://amigo.geneontology.org/amigo/term/GO:0030832	CFL2 ARHGAP35 TMOD2 TMOD4 DNAI3 ARPC1B SLIT2 HIP1R ARPC3 ACTN2 ARPC4 HCLS1 SWAP70 ARPC5 ACTR3 LMOD2 GRB2 CARMIL2 IL20RB GMFB SSH3 CAPZA2 BAG4 VASP WDR1 WAS GSN
0.00761592	83	519	1.46625	Intracellular protein-containing complex	http://amigo.geneontology.org/amigo/term/GO:0140535	XRCC6 EP300 DYRK2 HSP90AB1 POLG FBXO9 FBXO31 RUVBL2 UBE4B TAF4B CDC20 LEO1 PSMC6 PEX2 TCEA1 PSMD4 RPAP2 GTF2B UBE2C ACTB ELOB CNOT11 NAA15 CUL4A PPP2R2A KLHL22 DNA2 NAA35 ELP6 PRKAR2A TADA3 NAA50 OGT NAA10 POLA2 PPP2R5B DDB1 RAPSN PRR5L GTF2H1 BRD8 CAMK2A LAMTOR1 ANAPC15 PSMC2 KLHL20 CACYBP DTL TRAPPC11 BARD1 CUL3 PSMD1 MKLN1 ING3 PSME3 SPOP TAF13 CDC16 UBE2V2 MAT2A DCAF12 PPP2R1A TAF4 WDR5 TAF9B…
0.00761592	88	557	1.44852	Cellular response to DNA damage stimulus	http://amigo.geneontology.org/amigo/term/GO:0006974	XRCC6 EP300 PARPBP DYRK2 DEK TDP2 PHF1 CDKN1A POLG FBXO31 PARK7 RPA2 RNF138 ARMT1 ASCC3 INO80 RAD51 FANCM TRIM32 DCLRE1B POLB AP5Z1 GTF2I ERCC4 FANCL SPDYA GEN1 CUL4A CLU NEK1 DNA2 BCCIP MGMT EXO1 APTX XPC SKIL FANCB UBA1 MACROD1 DDB1 GTF2H1 RPS3 USP28 MDM4 DTL MCPH1 ACKR3 RAD1 NPM1 GRB2 AXIN2 MEIOC CBX1 AATF TAOK1 MSH6 BRIP1 ZBTB38 UBE2V2 NUCKS1 HNRNPK SNW1 RPS27L SMUG1 ATM KLHL15 RPL26 SMCHD1 P…
0.00770406	19	73	2.38631	Intrinsic apoptotic signaling pathway in response to DNA damage	http://amigo.geneontology.org/amigo/term/GO:0008630	EP300 DYRK2 CDKN1A TRIM32 POLB CLU SKIL RPS3 USP28 ACKR3 MSH6 HNRNPK SNW1 RPS27L ATM RPL26 TMEM161A BCL2L1 TPT1
0.00770406	36	180	1.83369	ATP metabolic process	http://amigo.geneontology.org/amigo/term/GO:0046034	EP300 ATP5F1B GPI PARK7 ATP5F1A CLPX HK1 PGAM1 NDUFB6 UQCRC1 ATP6V1A OGT OLA1 NDUFS6 GALK1 STAT3 ATP5MC1 RHOA EIF6 ISCU ATP5ME SLC2A6 COX5A COQ9 ATP5IF1 NDUFS3 ATP5PD ALDOA INS ATP5MF ATP5F1C PID1 ATP5F1D SHMT2 ATP5PB STOML2
0.00783672	6	10	5.50108	Negative regulation of focal adhesion assembly	http://amigo.geneontology.org/amigo/term/GO:0051895	ACVRL1 RCC2 DLC1 CORO1C ARHGAP6 PHLDB2
0.00783672	6	10	5.50108	Regulation of establishment of protein localization to telomere	http://amigo.geneontology.org/amigo/term/GO:0070203	TCP1 TERF1 CCT3 CCT7 CCT4 DKC1
0.00783672	6	10	5.50108	Negative regulation of cell-substrate junction organization	http://amigo.geneontology.org/amigo/term/GO:0150118	ACVRL1 RCC2 DLC1 CORO1C ARHGAP6 PHLDB2
0.00798876	21	85	2.26515	Mitotic spindle organization	http://amigo.geneontology.org/amigo/term/GO:0007052	LSM14A NUDC CEP192 CDC20 VPS4B PKD1 SPAST DRG1 BCCIP HNRNPU STAG1 TPR TACC1 ZNF207 RHOA CLTC CHMP1A PIBF1 STMN1 FLNA MECP2
0.00798876	48	263	1.67333	DOID:1826 epilepsy	ftp://ftp.rgd.mcw.edu/pub/data_release	GPLD1 POLG CEP128 DHX34 ARID1B SETBP1 INO80 BMP4 EGFL7 KCNQ3 CPA6 CRH RGS4 DPYD ARFGEF2 PKD1 SPAST MTR SAMD8 LGI1 HNRNPU KCNT2 KIF5B BSN GSPT2 PCDH19 SLC25A22 DGKZ KCNC1 SLC12A2 VDAC1 ELAPOR2 GRM3 TBR1 GFAP EFTUD2 TRPM4 SYN2 ILK COBLL1 MPP4 FOSB FLNA GABRB2 FOXG1 RAB40C MECP2 AKT1
0.00798876	30	141	1.95074	Actin polymerization or depolymerization	http://amigo.geneontology.org/amigo/term/GO:0008154	CFL2 ARHGAP35 TMOD2 TMOD4 DNAI3 ARPC1B SLIT2 HIP1R ARPC3 ACTN2 ARPC4 HCLS1 CFL1 SWAP70 ARPC5 ACTR3 LMOD2 GRB2 CARMIL2 IL20RB GMFB SSH3 CAPZA2 SPATC1L AIF1 BAG4 VASP WDR1 WAS GSN
0.00798876	21	85	2.26515	DOID:1749 squamous cell carcinoma	ftp://ftp.rgd.mcw.edu/pub/data_release	XRCC6 EP300 RIPK1 CDKN1A VEGFA CYP1A2 CEBPA HDAC2 TERF1 DDR2 CLU SAMD8 PGAM1 XPC UBA1 KMT2C ATM PTPN11 ING1 CRYAB AKT1
0.00798876	32	154	1.90513	Intracellular receptor signaling pathway	http://amigo.geneontology.org/amigo/term/GO:0030522	EP300 DDX17 RARG USP15 TRIM15 LSM14A PARK7 CITED2 RXRG DDRGK1 PUM2 NCOR2 MN1 YWHAH UFD1 CTBP2 UBA5 RELA TKFC SMARCA4 CALR STAT3 PHB GPS2 WBP2 RHOA SNW1 POU4F2 YAP1 DDX5 C1QBP KANK2
0.00798876	47	256	1.68327	Regulation of binding	http://amigo.geneontology.org/amigo/term/GO:0051098	EP300 CDKN1A SIN3A AMFR PARK7 EPB41 LARP6 BMP4 EIF3E SPTA1 NES GTF2B DDRGK1 ACTB ERCC4 PKD1 ARHGEF7 RAN HIP1R SPPL3 DKK1 IDE CTBP2 EFHB DOT1L UBASH3B GCG PLCL1 ISL1 NUCKS1 CDON FLOT1 CRMP1 MEPCE STMN1 NVL MAPRE3 RACK1 DACT1 TLE5 PLAUR SNAPIN PSME3IP1 TRIM28 PIN1 RFNG DDIT3
0.00814442	198	1436	1.26418	Metabolism	https://reactome.org/download/current	MCAT ESYT1 ATP5F1B SLC44A4 ITPR3 MOCS1 HSP90AB1 SLC25A27 ACSBG1 SIN3A MAN2C1 CYP1A2 ABHD4 GPHN ARG2 DLST GSTZ1 ITPK1 GLRX5 NQO1 GPT2 IL4I1 ETFB ACOT7 PIK3CD AGMAT AKR7A2 ACADM CTPS1 MTHFD1L NT5E AMD1 PLA2G4D IVD CNDP2 MTAP CARNMT1 TXN UCK1 DPYS RIDA SDC2 PDP1 CA2 BCAN FDPS CERS2 PHGDH PLCB4 SPTLC3 ACSS1 PANK2 VAPB PSPH XYLT1 HMOX2 HAGH FABP1 SPR CD38 TDO2 PAICS HADH HPGDS AUH RAN NCOR2 ALDH2 ACAD…
0.00814442	27	122	2.02909	Purine-containing compound biosynthetic process	http://amigo.geneontology.org/amigo/term/GO:0072522	ATP5F1B ACOT7 NT5E ATP5F1A ACSS1 PANK2 PAICS ADK QRICH1 ATP6V1A GUK1 ATP5MC1 NME2 AMPD3 ATP5ME PDHB PPCDC AK2 ATP5PD ALDOA ATP5MF ATP5F1C HPRT1 PID1 ATP5F1D ATP5PB STOML2
0.00830003	52	292	1.63274	Small GTPase mediated signal transduction	http://amigo.geneontology.org/amigo/term/GO:0007264	TMEM19 CDKN1A SIPA1L1 CCDC88C CDH13 ARHGAP35 PDPN WASF2 MAPRE2 DOCK7 SDCBP RHOC DLC1 ARFGEF2 YWHAQ SLIT2 USO1 SPRY2 RHOF RASGEF1A OGT MADD VAV1 DNMT1 RUFY1 RASGRF2 USP28 CBL CUL3 DBNL CYTH1 CDC42EP4 ITGA3 RHOA CDON FLOT1 RIT1 ARHGAP31 STMN1 RALGAPA2 RASGEF1B CHML AIF1 RALGAPA1 RAP1GAP2 CGNL1 RAC1 RABL3 WAS TRIM28 KANK2 RALA
0.00845526	26	116	2.055	Purine nucleotide biosynthetic process	http://amigo.geneontology.org/amigo/term/GO:0006164	ATP5F1B ACOT7 ATP5F1A ACSS1 PANK2 PAICS ADK QRICH1 ATP6V1A GUK1 ATP5MC1 NME2 AMPD3 ATP5ME PDHB PPCDC AK2 ATP5PD ALDOA ATP5MF ATP5F1C HPRT1 PID1 ATP5F1D ATP5PB STOML2
0.00845526	66	394	1.53583	DOID:1059 intellectual disability	ftp://ftp.rgd.mcw.edu/pub/data_release	EP300 SIN3A BBOF1 ZC2HC1C NEK9 ANGEL1 VRK1 GPT2 DHX34 TSEN34 PTGER3 ANKRD13C SERBP1 DOCK7 ARID1B ZUP1 SNX14 RARS2 ASCC3 SETBP1 AP4E1 LINS1 TJP1 CCBE1 DPYD SPR NAA15 THSD1 NEK5 ZCCHC8 COQ5 ADK ENTPD1 RGS7 HNRNPU STAG1 CHAF1B ARHGAP6 IL1RAPL1 PHF8 MED12 GPRASP1 GPRASP2 SLC9A6 NAA10 CAMK2A TPR TTI2 TBR1 SEMA5A KMT2C CHD3 KPNA3 ARHGEF6 SHANK2 BPTF GABRB2 SRGAP3 FOXG1 TAF6 MECP2 TMEM135 VPS36 ABCD4 SU…
0.00853901	5	7	6.5489	Protein-disulfide reductase (NAD(P)) activity	http://amigo.geneontology.org/amigo/term/GO:0047134	TXNRD1 TXNRD2 GSR NXN TXNDC17
0.00864756	65	387	1.53992	Signaling by Rho GTPases	https://reactome.org/download/current	TUBA1A ARHGAP9 NUP107 ARHGAP5 CENPT ARHGAP35 RCC2 NUDC WASF2 CDC20 YWHAZ RHOC SYDE2 DLC1 YWHAB ACTB ARPC1B YWHAQ ARHGEF7 CLIP1 RHOF ARPC3 DYNLL1 YWHAH KIF5B ARPC4 PAK2 ARHGAP6 ARHGEF9 ARHGAP36 MCF2 KLC2 PPP2R5B VAV1 PKN1 RASGRF2 ARAP1 ARPC5 CENPF ACTR3 FMNL2 NGEF BAIAP2 GRB2 TAOK1 ERCC6L RHOA ARHGEF5 H3F3B ARHGEF16 PPP2R1A DVL2 IL20RB ARHGAP31 ZWINT ARHGEF6 FLNA SPC24 SRGAP3 NOXA1 RAC1 WAS PPP1R1…
0.00866701	202	1471	1.25903	Purine nucleotide binding	http://amigo.geneontology.org/amigo/term/GO:0017076	DDX17 TUBA1A ACVRL1 ATP5F1B MYO1A TMEM19 STYK1 CRACR2A ABCD2 DYRK2 PRPF4B RIPK1 MAK TUBB SKIV2L HSP90AB1 RUNX2 ARHGAP5 NEK9 ITPK1 VRK1 HSP90AA1 ATP2C2 DNAJA2 TDRD12 ARHGAP35 DHX34 RUVBL2 ACOT7 KIF1B KIF17 PARS2 MAP3K4 TCP1 MTHFD1L HBS1L RARS2 MDN1 ASCC3 TTK EEF1A1 ATP5F1A MYO1E INO80 RAD51 VPS4B CLPX FANCM PSMC6 JAK2 RAB14 UCK1 DDR2 CCT3 RHOC GNAT2 ABCA4 ACSS1 PANK2 MYLK2 TUFM TRAP1 CCT7 CCT4 ABC…
0.00866701	25	110	2.08374	Ribose phosphate biosynthetic process	http://amigo.geneontology.org/amigo/term/GO:0046390	ATP5F1B ACOT7 CTPS1 ATP5F1A ACSS1 PANK2 PAICS ATP6V1A ATP5MC1 NME2 AMPD3 ATP5ME G6PD PDHB PPCDC AK2 ATP5PD ALDOA ATP5MF ATP5F1C HPRT1 PID1 ATP5F1D ATP5PB STOML2
0.008776	200	1455	1.26027	Purine ribonucleotide binding	http://amigo.geneontology.org/amigo/term/GO:0032555	DDX17 TUBA1A ACVRL1 ATP5F1B MYO1A TMEM19 STYK1 CRACR2A ABCD2 DYRK2 PRPF4B RIPK1 MAK TUBB SKIV2L HSP90AB1 RUNX2 ARHGAP5 NEK9 ITPK1 VRK1 HSP90AA1 ATP2C2 DNAJA2 TDRD12 ARHGAP35 DHX34 RUVBL2 ACOT7 KIF1B KIF17 PARS2 MAP3K4 TCP1 MTHFD1L HBS1L RARS2 MDN1 ASCC3 TTK EEF1A1 ATP5F1A MYO1E INO80 RAD51 VPS4B CLPX FANCM PSMC6 JAK2 RAB14 UCK1 DDR2 CCT3 RHOC GNAT2 ABCA4 ACSS1 PANK2 MYLK2 TUFM TRAP1 CCT7 CCT4 ABC…
0.00886708	19	74	2.35406	Protein N-terminus binding	http://amigo.geneontology.org/amigo/term/GO:0047485	EPB41 EIF3E SDCBP ERCC4 YWHAQ NCOR2 KCNIP2 APTX RELA SMARCA4 EXOC4 NPM1 CHMP6 ACOX1 DCTN4 RPS21 SRRM2 ZWINT MECP2
0.00886708	24	104	2.1158	PW:0000297 platelet-derived growth factor signaling pathway	ftp://ftp.rgd.mcw.edu/pub/data_release	ARHGAP35 PIK3CD WASF2 JAK2 YWHAZ YWHAB ARPC1B SLC9A3R2 YWHAQ YWHAH ACTA2 ARPC4 MAP2K7 ARAP1 CBL ACTR3 BAIAP2 MAP2K4 RHOA PDGFRB IL20RB PTPN11 RAC1 RAB5A
0.00888115	73	447	1.49731	Protein ubiquitination	http://amigo.geneontology.org/amigo/term/GO:0016567	HSP90AB1 CCNB1IP1 ARRDC4 HSP90AA1 FBXO9 AMFR IRF2BP1 PARK7 UBE4B RNF138 CDC20 RNF165 LEO1 TRIM69 FANCM TRIM32 MTBP RUSC1 UBE2C RNF181 FANCL UBA6 SPRY2 CUL4A WSB2 PPIL2 KLHL22 WWTR1 SENP2 OGT DDB1 PRMT3 MARCHF2 SQSTM1 RPS3 CBL RNF26 KLHL20 DTL BARD1 CUL3 RNF180 NPM1 TRIM47 PHF23 GPS2 SPOP CDC16 UBQLN1 RNF216 TRIM37 KLHL15 RLIM NXN RACK1 PCGF3 LTN1 WFS1 ANAPC2 SASH1 UBE2K RBX1 RNF168 U2AF2 WDSUB1 O…
0.00889972	9	22	3.75073	Negative regulation of mRNA processing	http://amigo.geneontology.org/amigo/term/GO:0050686	ZC3H14 RBM42 RNPS1 SRSF7 NPM1 HNRNPK U2AF2 C1QBP SRSF10
0.00907695	27	123	2.01259	Actin filament binding	http://amigo.geneontology.org/amigo/term/GO:0051015	MYO1A CFL2 MYO1E TMOD4 FERMT1 ARPC1B CTNNA2 ANTXR1 HIP1R ARPC3 CORO1C ACTN2 NEBL ARPC4 PLS3 TPM4 PKNOX2 ARPC5 ACTR3 DBNL AIF1 FLNA BLOC1S6 GSN MARCKS LASP1 TNNI3
0.00923488	86	546	1.44412	Regulation of protein localization	http://amigo.geneontology.org/amigo/term/GO:0032880	BICD1 HSP90AB1 ABHD17C SIN3A MMP14 AKAP5 GAS8 PDCD5 NR1H2 PARK7 EPB41 LEPROT TCP1 EPB41L2 SNX3 BMP4 RAB14 TERF1 CCT3 LMNA FERMT1 DDRGK1 NSFL1C ACTB GCC2 CCT7 CCT4 HADH RAN ERP29 ANKRD13A ACTN2 BAG3 KIF5B WWTR1 HCLS1 CDK16 DKC1 LRP5 STX3 PRR5L SWAP70 SQSTM1 CEP295 ICA1 TPR PTPN14 GCG BARD1 ACSL3 NPM1 ORMDL3 STAC2 ITGA3 MMD CEP250 MESD ARHGEF5 CLTC TARDBP MEPCE SLC2A1 RSL1D1 ARHGEF16 NVL ATCAY ATP5…
0.00965557	7	14	4.58423	Translation elongation factor activity	http://amigo.geneontology.org/amigo/term/GO:0003746	EEF1A1 EEF1D TUFM EEF1G EEF1B2 GFM1 EIF5A
0.00965557	15	52	2.64475	Purine nucleoside triphosphate biosynthetic process	http://amigo.geneontology.org/amigo/term/GO:0009145	ATP5F1B ATP5F1A ADK ATP6V1A ATP5MC1 NME2 ATP5ME ATP5PD ALDOA ATP5MF ATP5F1C PID1 ATP5F1D ATP5PB STOML2
0.00965557	7	14	4.58423	Negative regulation of smooth muscle cell migration	http://amigo.geneontology.org/amigo/term/GO:0014912	TPM1 SEMA6D SLIT2 PRKG1 NDRG4 SERPINE1 AIF1
0.00965768	72	441	1.49689	Regulation of cellular response to stress	http://amigo.geneontology.org/amigo/term/GO:0080135	YBX3 PARPBP RIPK1 DEK MBIP ARG2 AMFR NR1H2 PARK7 RPA2 TXNDC12 MAP3K4 ARMT1 CCN2 NCOA7 RAD51 TRIM32 COPS5 ATF6 MAGI3 DDRGK1 RBL1 ERCC4 SEMA4C STK24 CUL4A CLU ERP29 MGMT MECOM SKIL SGTA CRHBP RPS3 CHORDC1 ACKR3 STK25 NPM1 AXIN2 TAOK1 GPS2 UBQLN1 TIRAP HNRNPK RSL1D1 IL20RB KLHL15 YBX1 RPL26 SMCHD1 RACK1 XBP1 DACT1 DDX5 WFS1 SMG1 TMEM161A SASH1 GPX1 LRIG2 BCL2L1 MFHAS1 SFPQ EEF1E1 CLN3 WAS ANKLE1 TRI…
0.00967519	32	156	1.88071	Ribonucleoprotein granule	http://amigo.geneontology.org/amigo/term/GO:0035770	CKAP4 TUBB LSM14A PABPC4 RPS6 ACTB PUM2 INA HNRNPU FXR1 NFKBIZ KHSRP ELAVL1 NANOS3 SQSTM1 PSMC2 FASTKD2 BARD1 CHTOP DCP1A HNRNPK IGF2BP1 TIA1 CARHSP1 YTHDF2 YBX1 EIF2S1 RAC1 G3BP1 TNRC6A RPL28 YTHDF1
0.00969555	8	18	4.07487	Proton channel activity	http://amigo.geneontology.org/amigo/term/GO:0015252	ATP5F1B ATP5F1A ASIC5 HVCN1 ATP6V1A ATP5F1C ATP5F1D ATP5PB
0.00969555	28	130	1.97475	Spindle organization	http://amigo.geneontology.org/amigo/term/GO:0007051	TUBB LSM14A NUDC CEP192 CDC20 INO80 IVD VPS4B PKD1 SPAST DRG1 BCCIP HNRNPU STAG1 RGS14 RPS3 TPR TACC1 ZNF207 CHD3 RHOA CLTC CHMP1A PIBF1 STMN1 FLNA MECP2 RANBP1
0.00974643	201	1467	1.25621	Ribonucleotide binding	http://amigo.geneontology.org/amigo/term/GO:0032553	DDX17 TUBA1A ACVRL1 ATP5F1B MYO1A TMEM19 STYK1 CRACR2A ABCD2 DYRK2 PRPF4B RIPK1 MAK TUBB SKIV2L HSP90AB1 RUNX2 ARHGAP5 NEK9 ITPK1 VRK1 HSP90AA1 ATP2C2 DNAJA2 TDRD12 ARHGAP35 DHX34 RUVBL2 ACOT7 KIF1B KIF17 PARS2 MAP3K4 TCP1 MTHFD1L HBS1L RARS2 MDN1 ASCC3 TTK EEF1A1 ATP5F1A MYO1E INO80 RAD51 VPS4B CLPX FANCM PSMC6 JAK2 RAB14 UCK1 NDOR1 DDR2 CCT3 RHOC GNAT2 ABCA4 ACSS1 PANK2 MYLK2 TUFM TRAP1 CCT7 CC…
0.0098863	44	238	1.69501	Ribose phosphate metabolic process	http://amigo.geneontology.org/amigo/term/GO:0019693	EP300 ATP5F1B GPI ACOT7 CTPS1 NT5E ATP5F1A DPYS DPYD ACSS1 PANK2 PAICS RAN HK1 PGAM1 OXSM ATP6V1A OGT GALK1 STAT3 ATP5MC1 NME2 ACACA PIPOX AMPD3 EIF6 ATP5ME SLC2A6 G6PD PDHB GMPR PPCDC AK2 ATP5PD ALDOA INS ATP5MF ATP5F1C HPRT1 PID1 ATP5F1D MCEE ATP5PB STOML2
0.00992795	18	69	2.39177	Programmed Cell Death	https://reactome.org/download/current	RIPK1 H1-3 DHDH OMA1 YWHAZ LMNA YWHAB YWHAQ STK24 DIABLO DYNLL1 YWHAH FAS VIM SATB1 LMNB1 H1-4 PLEC
0.00996426	24	105	2.09565	Microtubule organizing center organization	http://amigo.geneontology.org/amigo/term/GO:0031023	MDM1 PKHD1 ATF5 CEP192 VPS4B CNTLN ODF2 NSFL1C GCC2 GEN1 CHORDC1 DEUP1 CEP295 MCPH1 NPM1 CEP250 CHD3 CHMP1A TRIM37 CEP85 XRCC2 RBM4 RANBP1 NDE1
0.0100837	37	190	1.78544	Chromosomal region	http://amigo.geneontology.org/amigo/term/GO:0098687	SUN2 NUP107 SIN3A CENPT RCC2 RPA2 TTK RAD51 IVD MTBP TERF1 DCLRE1B ERCC4 PPP1CB DYNLL1 DNA2 HNRNPU WDR82 CENPI THOC2 PPP1CA DNMT1 TPR CENPF CBX1 ZNF207 CTCF PPP2R1A KDM4A ZWINT FEN1 SMCHD1 SPC24 SS18L1 IKZF1 CBX5 NDE1
0.0101925	23	99	2.13005	DOID:9000918 Disease Progression	ftp://ftp.rgd.mcw.edu/pub/data_release	COPS7A ARG2 E2F4 AMFR PTOV1 SERBP1 RPS6 XPC DDB1 ARFGAP2 NDUFA2 CTSC PHB ERBB3 ZEB2 CTSB NOP56 NAXD YAP1 ING1 RPL15 ATF2 ABCD4
0.0102364	14	47	2.73103	Negative regulation of RNA catabolic process	http://amigo.geneontology.org/amigo/term/GO:1902369	DHX34 LRPPRC HNRNPU DKC1 ELAVL1 ANGEL2 AXIN2 MEIOC TIRAP TARDBP IGF2BP1 SECISBP2 YBX1 THRAP3
0.0103369	22	93	2.16888	RNA localization	http://amigo.geneontology.org/amigo/term/GO:0006403	NUP107 SRSF3 TCP1 TERF1 CCT4 RAN HNRNPU RBM15B THOC2 DKC1 DDX39A AKAP8L TPR NPM1 CHTOP FLOT1 KHDRBS1 LOC110257686 YBX1 FBL IWS1 HNRNPA2B1
0.0104007	21	87	2.21308	Ribosomal scanning and start codon recognition	https://reactome.org/download/current	RPS18 EIF3K RPS11 EIF3I RPS8 EIF3J RPS6 EIF3E RPS3A EIF3M RPS28 RPS21 RPS27L EIF4H RPS17 RPS7 RPS15 RPS2 RPS15A RPS25 RPS24
0.0104305	145	1013	1.31237	DOID:12849 autistic disorder	ftp://ftp.rgd.mcw.edu/pub/data_release	JARID2 GAS8 RIMS1 TJP1 KCNQ3 KCNA3 STRIP1 GNAT2 SYPL2 ELAPOR1 DPYD GTF2I PSPH STX1A TDO2 SNAP29 UFD1 MTR XPC NLGN1 PAK2 ARHGAP6 EGFL6 TCEANC FANCB ASB11 RBBP7 REPS2 RAI2 ACOT9 IL1RAPL1 MED14 CDK16 UBA1 ZNF157 GSPT2 HSD17B10 PHF8 MED12 OGT PCDH19 SRPX2 XKRX CENPI TIMM8A ZMAT1 GPRASP1 GPRASP2 TCEAL1 NRK RNF128 RBM41 PLS3 SLC25A5 THOC2 PRR32 XPNPEP2 AIFM1 ZNF280C IGSF1 GPC3 FAM122B SLC9A6 RBMX MCF2 …
0.0104721	26	118	2.02017	PW:0000638 Endoplasmic Reticulum-associated degradation pathway	ftp://ftp.rgd.mcw.edu/pub/data_release	HSP90AB1 AMFR DNAJA2 UBE4B ATF6 SEC23B NSFL1C HSPH1 UGGT2 ERP29 UFD1 SEC24C MAP2K7 PRKCSH EDEM3 DNAJC10 UBQLN1 RRBP1 SSR3 WFS1 EIF2S1 TXNDC5 OS9 CRYAB HERPUD1 DDIT3
0.0105545	46	253	1.66699	Cellular component disassembly	http://amigo.geneontology.org/amigo/term/GO:0022411	CFL2 VRK1 PDPN MAPRE2 SNX14 TMOD2 VPS4B DDR2 UFC1 TMOD4 DDRGK1 SPAST DENR SMARCB1 SNAP29 ACTN2 KIF5B UBA5 SLC25A5 AIFM1 CFL1 SWAP70 C3 SMARCA4 CDC37 AKAP8L SQSTM1 VDAC1 ETF1 LAMC1 LMOD2 TAOK1 PHF23 UBQLN1 CARMIL2 FLOT1 OPTN STMN1 ATP5IF1 CAPZA2 SNAPIN WDR1 CLN3 GSN EIF5A ERN2
0.0106497	162	1151	1.29044	Protein phosphorylation	http://amigo.geneontology.org/amigo/term/GO:0006468	XRCC6 ACVRL1 USP15 PTPRO STYK1 DYRK2 PRPF4B RIPK1 MAK CDKN1A HSP90AB1 NEK9 CCDC88C VRK1 HSP90AA1 PARK7 DOCK7 MAP3K4 TTK CD109 COPS2 RAD51 BMP4 JAK2 YWHAZ SDCBP DDR2 CCN1 DDRGK1 MYLK2 CASS4 PKD1 MAP4K3 SPDYA EMILIN1 GRK4 SLIT2 CDK8 NEK5 SPRY2 STK24 SEMA4D CLU NEK1 ERP29 CORO1C DKK1 PRKG1 BCCIP PRKAR2A TADA3 RYK WWTR1 EIF2A HRG PAK2 MYLK HCLS1 CDK16 CCNB3 NRK CCNQ LRP5 PRR5L C3 MAP2K7 CDC37 PKN1 AK…
0.0107479	13	42	2.83786	ATP biosynthetic process	http://amigo.geneontology.org/amigo/term/GO:0006754	ATP5F1B ATP5F1A ATP6V1A ATP5MC1 ATP5ME ATP5PD ALDOA ATP5MF ATP5F1C PID1 ATP5F1D ATP5PB STOML2
0.0110896	12	37	2.97356	Negative regulation of mRNA catabolic process	http://amigo.geneontology.org/amigo/term/GO:1902373	DHX34 HNRNPU ELAVL1 ANGEL2 AXIN2 MEIOC TIRAP TARDBP IGF2BP1 SECISBP2 YBX1 THRAP3
0.0111344	38	198	1.7596	Mitochondrial protein-containing complex	http://amigo.geneontology.org/amigo/term/GO:0098798	POLG ATP5F1A CLPX MRPS2 UQCRC2 DNA2 MRPL43 NDUFB6 MRPL39 HSD17B10 SLC25A5 MRPL11 MRPL49 TIMM29 MRPL4 VDAC1 NDUFA2 MRPL48 PMPCB AGK CHCHD3 NDUFS6 PHB NDUFV3 ATP5ME COX5A IMMT LOC100624067 MRPS14 NDUFB4 NDUFS3 ATP5MD ATP5PD MRPL12 ATP5F1C ATP5F1D ATP5PB NDUFA5
0.0113264	108	721	1.37336	DOID:5419 schizophrenia	ftp://ftp.rgd.mcw.edu/pub/data_release	SLC26A8 SLC25A27 RCN2 PSTPIP1 SIN3A MAN2C1 SCAMP2 CPLX3 CYP1A2 STOML1 NPAS3 ARHGEF1 ZNF575 TJP1 DMRTA1 MTAP TRIM32 YWHAZ SELENBP1 DPYD ARPC1B GTF2I STX1A TUFM XYLT1 ARID5A NEURL3 SEMA4C CNNM3 CNNM4 CCT4 LRATD1 PAICS YWHAH GNAZ SMARCB1 SNAP29 UFD1 WDR11 CELF2 CALML5 MB21D2 PAK2 MAP2K7 DNMT1 FNIP1 CTSC VPS11 CBL RNF26 UBASH3B PANX CCDC15 PKNOX2 PUS3 SRPRA DCPS ST3GAL4 NTM GRM3 ACTR3 CSMD1 NRG1 PARD…
0.0114618	42	226	1.70387	Cell leading edge	http://amigo.geneontology.org/amigo/term/GO:0031252	PARVB PDPN WASF2 TPM1 DLC1 ACTB ANTXR1 ARHGEF7 HIP1R ARPC3 CORO1C ABLIM1 JCAD VIM MYLK STX3 DGKZ KCNC1 RPS3 ARPC5 ACTR3 ALS2 MKLN1 DBNL ITGB4 SLC9A3R1 RHOA PHLDB2 CARMIL2 FLOT1 ILK ARHGAP31 SLC39A6 PALLD VAMP7 PTK6 AIF1 RAC1 FAM89B VASP GSN RAB5A
0.0114618	15	53	2.59485	Ribonucleoside triphosphate biosynthetic process	http://amigo.geneontology.org/amigo/term/GO:0009201	ATP5F1B CTPS1 ATP5F1A ATP6V1A ATP5MC1 NME2 ATP5ME ATP5PD ALDOA ATP5MF ATP5F1C PID1 ATP5F1D ATP5PB STOML2
0.0115189	23	100	2.10875	Nuclear export	http://amigo.geneontology.org/amigo/term/GO:0051168	NUP107 SRSF3 PARK7 PKD1 RAN BAG3 RBM15B THOC2 CALR DDX39A AKAP8L HSPA9 TPR PTPN14 BARD1 NPM1 CHTOP KHDRBS1 LOC110257686 PTPN11 IWS1 HNRNPA2B1 ANKLE1
0.011774	22	94	2.14581	DOID:11984 hypertrophic cardiomyopathy	ftp://ftp.rgd.mcw.edu/pub/data_release	TPM1 LMNA MYLK2 PKD1 RYR2 BAG3 MADD RAPSN ARFGAP2 TBCA AKAP9 HTR2B NPM1 TRPM4 DSG2 SSUH2 DTNA PTPN11 INS CRYAB MYL2 TNNI3
0.0118949	30	145	1.89692	Cytoplasmic ribonucleoprotein granule	http://amigo.geneontology.org/amigo/term/GO:0036464	CKAP4 TUBB LSM14A PABPC4 RPS6 ACTB PUM2 INA HNRNPU NFKBIZ KHSRP ELAVL1 NANOS3 SQSTM1 PSMC2 BARD1 CHTOP DCP1A HNRNPK IGF2BP1 TIA1 CARHSP1 YTHDF2 YBX1 EIF2S1 RAC1 G3BP1 TNRC6A RPL28 YTHDF1
0.0118949	21	88	2.18793	Translation initiation complex formation	https://reactome.org/download/current	RPS18 EIF3K RPS11 EIF3I RPS8 EIF3J RPS6 EIF3E RPS3A EIF3M RPS28 RPS21 RPS27L EIF4H RPS17 RPS7 RPS15 RPS2 RPS15A RPS25 RPS24
0.0122676	39	206	1.73578	Nucleocytoplasmic transport	http://amigo.geneontology.org/amigo/term/GO:0006913	NUP107 SRSF3 CDKN1A IPO4 PARK7 BMP4 LMNA FERMT1 PKD1 RAN BAG3 RBM15B HCLS1 THOC2 POLA2 ELAVL1 CALR DDX39A AKAP8L RGS14 HSPA9 TPR PTPN14 BARD1 NPM1 STAT3 CHTOP KHDRBS1 TARDBP KPNA3 LOC110257686 NUP35 PTPN11 FLNA ING1 IWS1 HNRNPA2B1 ANKLE1 TRIM28
0.0124977	14	48	2.67413	Oxidoreductase activity, acting on a sulfur group of donors	http://amigo.geneontology.org/amigo/term/GO:0016667	TXNRD1 GLRX5 TXNL1 TXN PRSS55 TXNRD2 CHCHD4 DLD GSR DNAJC10 SRXN1 NXN SH3BGRL3 TXNDC17
0.0129302	36	186	1.77454	Nonsense-Mediated Decay (NMD)	https://reactome.org/download/current	RPS18 RPS11 RPS8 RPS6 RPL30 RNPS1 RPS3A GSPT2 RPLP2 RPS28 ETF1 RPL19 RPS21 RPS27L PPP2R1A UPF3A RPL13 NCBP2 RPS17 RPL29 RBM8A RPL26 RPS7 RPL7 SMG1 RPS15 RPS2 RPL35 RPL17 RPL23A RPS15A RPL32 RPS25 RPL23 RPL28 RPS24
0.0129302	36	186	1.77454	Nonsense Mediated Decay (NMD) enhanced by the Exon Junction Complex (EJC)	https://reactome.org/download/current	RPS18 RPS11 RPS8 RPS6 RPL30 RNPS1 RPS3A GSPT2 RPLP2 RPS28 ETF1 RPL19 RPS21 RPS27L PPP2R1A UPF3A RPL13 NCBP2 RPS17 RPL29 RBM8A RPL26 RPS7 RPL7 SMG1 RPS15 RPS2 RPL35 RPL17 RPL23A RPS15A RPL32 RPS25 RPL23 RPL28 RPS24
0.0129323	118	803	1.3473	Biological process involved in interspecies interaction between organisms	http://amigo.geneontology.org/amigo/term/GO:0044419	XRCC6 EP300 USP15 TRIM26 TRIM15 HSP90AB1 SIN3A ARG2 NPC2 HSP90AA1 FBXO9 AP1G1 LSM14A CEP192 ADGRL2 IGF2R TCP1 SNX3 VPS4B TRIM32 PGLYRP4 GSDMD VAPB AGBL5 PUM2 ELMOD2 LAMP1 PSPC1 CLU OASL SMARCB1 UFD1 LYST ACTA2 CCDC186 PRDX3 KIF5B VIM STAB1 RAB7A HRG THOC2 GPC3 IRF7 PC RELA EEF1G TKFC DDB1 RAPSN C3 VAV1 SMARCA4 CDC37 ICAM1 PRDX2 AKAP8 RNF26 MR1 C4BPB ACTR3 IRF2 FZD5 ZC3HAV1 IRF5 BAIAP2 CDC42EP4 PH…
0.0132915	46	256	1.64746	Purine-containing compound metabolic process	http://amigo.geneontology.org/amigo/term/GO:0072521	EP300 ATP5F1B GPI ACOT7 NT5E ATP5F1A DPYD ACSS1 PANK2 PAICS RAN HK1 ADK PGAM1 OXSM QRICH1 ACP3 ATP6V1A OGT MACROD1 GUK1 GALK1 STAT3 ATP5MC1 NME2 ACACA PIPOX AMPD3 EIF6 ATP5ME SLC2A6 PDHB GMPR PPCDC AK2 ATP5PD ALDOA INS ATP5MF ATP5F1C HPRT1 PID1 ATP5F1D MCEE ATP5PB STOML2
0.0133769	39	207	1.72739	Nuclear transport	http://amigo.geneontology.org/amigo/term/GO:0051169	NUP107 SRSF3 CDKN1A IPO4 PARK7 BMP4 LMNA FERMT1 PKD1 RAN BAG3 RBM15B HCLS1 THOC2 POLA2 ELAVL1 CALR DDX39A AKAP8L RGS14 HSPA9 TPR PTPN14 BARD1 NPM1 STAT3 CHTOP KHDRBS1 TARDBP KPNA3 LOC110257686 NUP35 PTPN11 FLNA ING1 IWS1 HNRNPA2B1 ANKLE1 TRIM28
0.0134675	22	95	2.12322	Regulation of protein localization to nucleus	http://amigo.geneontology.org/amigo/term/GO:1900180	SIN3A PARK7 BMP4 LMNA FERMT1 RAN BAG3 WWTR1 HCLS1 TPR NPM1 ORMDL3 TARDBP MEPCE NVL ATP13A2 YAP1 FLNA INS MFHAS1 TRIM28 PIN1
0.0135085	18	71	2.3244	Biosynthesis of amino acids	http://www.genome.jp/kegg-bin/show_pathway?ssc01230	ARG2 GPT2 PHGDH PSPH MTR PGAM1 TALDO1 PC ASNS MAT2A BCAT1 IDH3A ALDOA PYCR3 GOT2 CS SDS SHMT2
0.0135085	6	11	5.00098	CD28 dependent Vav1 pathway	https://reactome.org/download/current	PAK2 CD86 VAV1 GRB2 CD28 RAC1
0.0135085	6	11	5.00098	Regulation of establishment of protein localization to chromosome	http://amigo.geneontology.org/amigo/term/GO:0070202	TCP1 TERF1 CCT3 CCT7 CCT4 DKC1
0.01357	21	89	2.16334	Activation of the mRNA upon binding of the cap-binding complex and eIFs and subsequent binding to 43S	https://reactome.org/download/current	RPS18 EIF3K RPS11 EIF3I RPS8 EIF3J RPS6 EIF3E RPS3A EIF3M RPS28 RPS21 RPS27L EIF4H RPS17 RPS7 RPS15 RPS2 RPS15A RPS25 RPS24
0.01357	10	28	3.27445	Energy coupled proton transport, down electrochemical gradient	http://amigo.geneontology.org/amigo/term/GO:0015985	ATP5F1B ATP5F1A ATP6V1A ATP5MC1 ATP5ME ATP5PD ATP5F1C ATP5F1D ATP5PB STOML2
0.01357	10	28	3.27445	ATP synthesis coupled proton transport	http://amigo.geneontology.org/amigo/term/GO:0015986	ATP5F1B ATP5F1A ATP6V1A ATP5MC1 ATP5ME ATP5PD ATP5F1C ATP5F1D ATP5PB STOML2
0.0137025	15	54	2.54679	Regulation of histone methylation	http://amigo.geneontology.org/amigo/term/GO:0031060	JARID2 PHF1 LMNA SMARCB1 PAXBP1 OGT DNMT1 GCG CHTOP SNW1 CTCF WDR5 KDM4A MECP2 IWS1
0.0138532	12	38	2.8953	Protein kinase A binding	http://amigo.geneontology.org/amigo/term/GO:0051018	AKAP5 WASF2 ARFGEF2 RYR2 MYRIP PRKAR2A AKAP8 RPS3 AKAP9 SPATC1L AKAP12 DACT1
0.0138532	8	19	3.8604	Establishment of protein localization to chromosome	http://amigo.geneontology.org/amigo/term/GO:0070199	RUVBL2 TCP1 TERF1 CCT3 CCT7 CCT4 DKC1 MACROH2A2
0.0139144	27	127	1.9492	DOID:9006205 Animal Disease Models	ftp://ftp.rgd.mcw.edu/pub/data_release	XRCC6 HNRNPA1 DEK IPO4 PABPC4 RCL1 EIF3E PKD1 HELLS VIM SATB1 TIMM8A NAA10 LDHA SFXN1 LMNB1 NPM1 AXIN2 GFAP RHOA SNRPG NOP56 FBL AIF1 MRPL12 MECP2 AKT1
0.0139585	11	33	3.05615	Negative regulation of response to endoplasmic reticulum stress	http://amigo.geneontology.org/amigo/term/GO:1903573	NR1H2 PARK7 TXNDC12 DDRGK1 CLU SGTA IL20RB XBP1 WFS1 BCL2L1 HERPUD1
0.0139585	11	33	3.05615	Positive regulation of histone methylation	http://amigo.geneontology.org/amigo/term/GO:0031062	JARID2 PHF1 LMNA PAXBP1 OGT DNMT1 GCG CHTOP SNW1 WDR5 MECP2
0.0141535	55	322	1.56604	Organelle fission	http://amigo.geneontology.org/amigo/term/GO:0048285	CCNB1IP1 LSM14A NUDC CEP192 CDC20 TTK INO80 VPS4B FANCM BMP4 MTBP TERF1 NSFL1C UBE2C SPAST GEN1 RAN CORO1C DRG1 BCCIP HNRNPU STAG1 NAA50 RPL24 NAA10 LRP5 CALR AKAP8 AKAP8L ANAPC15 TPR ACTR3 CUL3 RAD1 CHMP6 MEIOC PSMC3IP ZNF207 BRIP1 RHOA CHMP1A PIBF1 ATM RNF212B VPS35 CEP85 ZWINT CD28 FLNA INS TMEM135 FGF8 RANBP1 UBE2B FOXJ2
0.0143321	43	236	1.67052	Salmonella infection	http://www.genome.jp/kegg-bin/show_pathway?ssc05132	TUBA1A RIPK1 TUBB HSP90AB1 HSP90AA1 DHDH PIK3CD TXN GSDMD ACTB ARPC1B GCC2 ARPC3 DYNLL1 ACTR1A KIF5B FLNB ARPC4 RAB7A KLC2 RELA MAP2K7 PKN1 RPS3 VPS11 ARPC5 ACTR3 EXOC4 CYTH1 MAP2K4 DCTN4 RHOA TIRAP KPNA3 CSE1L AHNAK FLNA RAC1 DYNLRB1 RAB5A AKT1 MYL2 RALA
0.014508	16	60	2.44492	EPH-Ephrin signaling	https://reactome.org/download/current	SDC2 SDCBP ACTB ARPC1B ARHGEF7 ARPC3 ARPC4 PAK2 ARPC5 ACTR3 NGEF RHOA ARHGEF28 RAC1 EFNA4 EPHA10
0.014508	16	60	2.44492	Nucleoside triphosphate biosynthetic process	http://amigo.geneontology.org/amigo/term/GO:0009142	ATP5F1B CTPS1 ATP5F1A ADK ATP6V1A ATP5MC1 NME2 ATP5ME ATP5PD ALDOA ATP5MF ATP5F1C PID1 ATP5F1D ATP5PB STOML2
0.014508	16	60	2.44492	PW:0000360 hypoxia inducible factor pathway	ftp://ftp.rgd.mcw.edu/pub/data_release	EP300 VEGFA MMP14 HIF3A CITED2 NT5E EIF3E COPS5 ELOB HIF1AN LDHA NPM1 SLC11A2 PLIN2 OS9 AKT1
0.014508	16	60	2.44492	Modulation of process of other organism involved in symbiotic interaction	http://amigo.geneontology.org/amigo/term/GO:0051817	EP300 IGF2R VAPB SMARCB1 PC RAPSN SMARCA4 PHB RRP1B NUCKS1 SNW1 TARDBP BCL2L1 TBC1D20 STOM APCS
0.014545	7	15	4.27862	Nuclear DNA replication	http://amigo.geneontology.org/amigo/term/GO:0033260	INO80 RAD51 RTF2 DACH1 DNA2 DBF4B ZNF830
0.0148051	106	712	1.36497	Circulatory system development	http://amigo.geneontology.org/amigo/term/GO:0072359	EP300 ACVRL1 GPLD1 CDKN1A CDH13 WASF2 ACADM CTH SMOC2 CITED2 CCN2 TPM1 MYO1E TJP1 CCBE1 BMP4 ANXA1 ANKS6 YWHAZ SULF1 LMNA SYPL2 COL11A1 CCN1 PANK2 MYLK2 GTF2I IFT140 PKD1 ANTXR1 EMILIN1 SLIT2 SPRY2 MYO18B RYR2 ACTN2 DKK1 ACTA2 HNRNPU JCAD ARMC4 NEBL STAB1 HRG MYLK MED12 SRPX2 GPC3 LRP5 C3 DNMT1 FZD4 PTPN14 ANGPT2 ADGRA2 NRG1 ACVR1 FZD5 HTR2B ACKR3 HOXA5 ISL1 AXIN2 STAT3 FKBP10 GGNBP2 SERPINF1 ERB…
0.0148409	14	49	2.61956	Positive regulation of osteoblast differentiation	http://amigo.geneontology.org/amigo/term/GO:0045669	RUNX2 CEBPA BMP4 DDR2 CCN1 DNAI3 WWTR1 LRP5 FBN2 ACVR1 IL6ST ILK YAP1 CEBPD
0.0148409	14	49	2.61956	Mitotic spindle assembly	http://amigo.geneontology.org/amigo/term/GO:0090307	LSM14A CEP192 CDC20 VPS4B DRG1 BCCIP HNRNPU STAG1 TPR ZNF207 RHOA CHMP1A PIBF1 FLNA
0.0150477	92	603	1.39884	DNA metabolic process	http://amigo.geneontology.org/amigo/term/GO:0006259	XRCC6 ACVRL1 PARPBP DEK TDP2 CDKN1A HSP90AB1 POLG CCNB1IP1 HSP90AA1 PARK7 RPA2 RNF138 SMOC2 MAP3K4 TCP1 ASCC3 INO80 RAD51 FANCM EXOSC3 TERF1 TOX CCT3 DCLRE1B POLB RTF2 AP5Z1 GTF2I ERCC4 CCT7 CCT4 FANCL GEN1 DACH1 CUL4A DNA2 DNTT BCCIP MGMT EXO1 HNRNPU APTX CCDC36 XPC MCM2 MORC1 FANCB AIFM1 DKC1 BANF1 POLA2 DDB1 GTF2H1 SWAP70 MAP2K7 DNMT1 RPS3 DTL MCPH1 NPM1 AXIN2 MEIOC PSMC3IP PHB MSH6 PGBD5 BRIP…
0.0150717	17	66	2.36157	Negative regulation of extrinsic apoptotic signaling pathway	http://amigo.geneontology.org/amigo/term/GO:2001237	RIPK1 PARK7 BMP4 LMNA RELA ICAM1 PRDX2 ACVR1 PSME3 SERPINE1 YAP1 PEA15 GPX1 BCL2L1 GCLM HMOX1 EYA1
0.0152367	44	244	1.65333	Regulation of DNA metabolic process	http://amigo.geneontology.org/amigo/term/GO:0051052	ACVRL1 PARPBP DEK CDKN1A HSP90AB1 HSP90AA1 RPA2 SMOC2 MAP3K4 TCP1 RAD51 EXOSC3 TERF1 TOX CCT3 ERCC4 CCT7 CCT4 DACH1 CUL4A MGMT HNRNPU MORC1 AIFM1 DKC1 MAP2K7 RPS3 NPM1 AXIN2 MSH6 NUCKS1 ATM NVL KLHL15 CD28 SMCHD1 SMG1 TMEM161A MECP2 WAS ANKLE1 TRIM28 UBE2B EYA1
0.0153086	43	237	1.66348	Ribonucleotide metabolic process	http://amigo.geneontology.org/amigo/term/GO:0009259	EP300 ATP5F1B GPI ACOT7 CTPS1 NT5E ATP5F1A DPYS DPYD ACSS1 PANK2 PAICS RAN HK1 PGAM1 OXSM ATP6V1A OGT GALK1 STAT3 ATP5MC1 NME2 ACACA PIPOX AMPD3 EIF6 ATP5ME SLC2A6 PDHB GMPR PPCDC AK2 ATP5PD ALDOA INS ATP5MF ATP5F1C HPRT1 PID1 ATP5F1D MCEE ATP5PB STOML2
0.0153991	18	72	2.29212	Positive regulation of mRNA metabolic process	http://amigo.geneontology.org/amigo/term/GO:1903313	PNLDC1 LEO1 EXOSC3 RIDA PRR5L DAZAP1 DCPS ZC3HAV1 DCP1A PRDX6 SNW1 TARDBP SNRNP70 NCBP2 YTHDF2 THRAP3 TRA2B YTHDF1
0.0157305	92	604	1.39652	Regulation of cell migration	http://amigo.geneontology.org/amigo/term/GO:0030334	SUN2 ACVRL1 GPLD1 MMP14 RIN3 LGMN CDH13 GPI PIK3CD PDPN RCC2 MAPRE2 DOCK7 SMOC2 CITED2 ATP5F1A TPM1 SEMA6D CCBE1 BMP4 ANXA1 TRIM32 SULF1 SDCBP DDR2 LMNA RHOC CCN1 DNAI3 DLC1 FERMT1 DDRGK1 CASS4 IL1R1 ATOH8 EMILIN1 SLIT2 DACH1 SPRY2 STK24 SEMA4D CORO1C PRKG1 JCAD ELP6 HRG MYLK SRPX2 PRR5L SWAP70 ICAM1 CALR CAMK2A ST3GAL4 LAMB1 MGAT5 ANGPT2 ADGRA2 ACVR1 SLC9A3R1 STAT3 TMIGD1 NTN1 DAPK2 NDRG4 RHOA P…
0.0157724	24	109	2.01874	Ribonucleotide biosynthetic process	http://amigo.geneontology.org/amigo/term/GO:0009260	ATP5F1B ACOT7 CTPS1 ATP5F1A ACSS1 PANK2 PAICS ATP6V1A ATP5MC1 NME2 AMPD3 ATP5ME PDHB PPCDC AK2 ATP5PD ALDOA ATP5MF ATP5F1C HPRT1 PID1 ATP5F1D ATP5PB STOML2
0.0160473	13	44	2.70886	Membrane docking	http://amigo.geneontology.org/amigo/term/GO:0022406	ESYT1 SNX3 STX1A SNAP29 CTBP2 RAB7A STX3 STXBP2 ICAM1 EXOC4 NDRG4 PPFIA3 CLN3
0.0160781	28	135	1.90161	Protein-macromolecule adaptor activity	http://amigo.geneontology.org/amigo/term/GO:0030674	SUN2 BICD1 AMFR CNTLN STX1A HIP1R NOLC1 ARPC4 GRIP2 DDB1 STX3 RAPSN STAP2 TCOF1 BNIP1 BAIAP2 GRB2 KHDRBS1 OPTN DVL2 IL20RB RACK1 PTPN11 MAGI2 JCHAIN TSNARE1 CBX5 HERPUD1
0.0162471	54	317	1.56182	Mitochondrial membrane	http://amigo.geneontology.org/amigo/term/GO:0031966	SLC25A27 ACADM OMA1 ATP5F1A ARMC1 UQCRC2 TRAP1 LOC100516606 ETFDH CLU COQ5 SAMD8 NDUFB6 SLC25A5 PGRMC1 SLC25A22 CPT1A TIMM44 TIMM29 SFXN1 VDAC1 NDUFA2 RPS3 AGK CHCHD3 BNIP1 NDUFS6 PHB SDHA NDUFV3 ATP5ME COX5A IMMT CYP11A1 ATCAY LOC100624067 MTG1 NDUFB4 NDUFS3 ATP5MD ATP5PD SLC25A11 SLC25A6 ATP5MF ATP5F1C BCL2L1 ATP5F1D SHMT2 ATP5PB NDUFA5 ATF2 STOML2 TYMS TMEM65
0.0163691	23	103	2.04733	PW:0000017 Huntington's disease pathway	ftp://ftp.rgd.mcw.edu/pub/data_release	EP300 SIN3A TAF4B HDAC2 PLCB4 SAMD8 NDUFB6 SLC25A5 VDAC1 NDUFA2 NDUFS6 ATP5MC1 DCTN4 TBPL1 CLTC TGM2 DNAI2 TAF4 NDUFB4 ATP5F1C ATP5F1D ATP5PB NDUFA5
0.0166712	40	217	1.69004	Neddylation	https://reactome.org/download/current	COPS7A FBXO9 FBXO31 HIF3A FBXL4 COPS2 PSMC6 COPS5 PSMD4 NEURL2 ELOB FBXO41 CUL4A WSB2 FBXO21 KLHL22 ASB11 RBBP7 DDB1 RAPSN COMMD9 COMMD10 PSMC2 KLHL20 DTL CUL3 PSMD1 ASB18 PSME3 COPS3 ASB8 SENP8 PSMB1 CUL5 COMMD8 RBX1 PSMD9 FBXL18 PSMC4 DCAF5
0.017103	4	5	7.33477	Eukaryotic Translation Elongation	https://reactome.org/download/current	EEF1A1 EEF1D EEF1G EEF1B2
0.017103	4	5	7.33477	Actin crosslink formation	http://amigo.geneontology.org/amigo/term/GO:0051764	BAIAP2 AIF1 FLNA MARCKS
0.0171247	5	8	5.73029	DOID:4449 macular retinal edema	ftp://ftp.rgd.mcw.edu/pub/data_release	VEGFA CLU SERPINF1 NDP APOH
0.0171247	5	8	5.73029	Protein hexamerization	http://amigo.geneontology.org/amigo/term/GO:0034214	LRRC8C SPAST MAT2A UGDH TWNK
0.0172059	88	575	1.40317	Synapse	http://amigo.geneontology.org/amigo/term/GO:0045202	PACSIN2 PTPRO ABHD17C CPLX3 AKAP5 GPHN WASF2 ADGRL2 LRFN5 YWHAZ COPS5 IGSF9 BCAN SYPL2 PLCB4 ACTB STX1A SEMA4C ARHGEF7 LAMP1 PPP2R2A CLU LGI1 INA CTBP2 GAD2 MYRIP BSN GRIP2 NLGN1 FXR1 PAK2 RPL24 IL1RAPL1 CDK16 SLC9A6 SLITRK2 RELA STX3 RAPSN ELAVL1 TMED9 RGS14 CAMK2A RPS3 CAPN5 FZD4 VPS11 AKAP9 ICA1 GRM3 SYPL1 ALS2 SERPINE2 CTTNBP2 BAIAP2 TANC2 ITGA3 SYNC RPS21 RHOA PPFIA3 FLOT1 LIN7C ASCC1 SYN2 C…
0.0173137	34	176	1.77118	DOID:9000965 Neoplasm Metastasis	ftp://ftp.rgd.mcw.edu/pub/data_release	AMIGO2 DEK CDKN1A VEGFA ACSBG1 CAP1 SERPINB5 TNC DPYD ERCC4 ANTXR1 CLU ERP29 VIM XPC MYLK CD86 TPM4 CACYBP ACKR3 SERPINF1 ERBB3 RHOA BRD4 PDGFRB CTSB SLC39A6 YAP1 PLAUR LLGL2 TXNDC5 RAC1 CBX5 PXN
0.0173909	10	29	3.16154	Proton-transporting ATP synthase complex	http://amigo.geneontology.org/amigo/term/GO:0045259	ATP5F1B ATP5F1A ATP5MC1 ATP5ME ATP5MD ATP5PD ATP5MF ATP5F1C ATP5F1D ATP5PB
0.0173931	59	355	1.52377	Cell projection assembly	http://amigo.geneontology.org/amigo/term/GO:0030031	PARVB MYO1A PTPRO MAK PKHD1 GAS8 CDH13 E2F4 CFAP20 ARHGAP35 RCC2 UBXN10 WASF2 IFT140 SLIT2 FHDC1 ARHGEF7 NEK1 CORO1C SNAP29 ACTN2 ABLIM1 ARMC4 WWTR1 HRG MYLK ICAM1 ARAP1 HOATZ ACTR3 CEP41 DBNL MYO10 SPEF2 SEPTIN9 ITGB4 SLC9A3R1 CDC42EP4 CEP250 TAPT1 CARMIL2 DNAI2 PIBF1 IL20RB YAP1 FAM110C AIF1 ATP6V1D FLNA BAG4 RAC1 CLN3 WAS RAB5A WDR60 UBE2B PALM RP1 RALA
0.0174935	35	183	1.75353	Response to endoplasmic reticulum stress	http://amigo.geneontology.org/amigo/term/GO:0034976	EP300 AMFR NR1H2 PARK7 TXNDC12 PSMC6 COPS5 ATF6 UFC1 DDRGK1 VAPB CLU ERP29 UFD1 UBA5 EIF2B5 AIFM1 SGTA RASGRF2 EDEM3 NIBAN1 GORASP2 DNAJC10 UBQLN1 FLOT1 IL20RB XBP1 WFS1 EIF2S1 BCL2L1 OS9 SEC61B ERN2 HERPUD1 DDIT3
0.0175763	20	85	2.15729	Nuclear receptor binding	http://amigo.geneontology.org/amigo/term/GO:0016922	EP300 RARG NR1H2 PARK7 GTF2B ARID5A YWHAH CTBP2 TADA3 MED12 GTF2H1 SMARCA4 CALR PKN1 BRD8 NRIP1 WBP2 SNW1 THRAP3 DDX5
0.0176059	65	400	1.48988	Transmembrane receptor protein tyrosine kinase signaling pathway	http://amigo.geneontology.org/amigo/term/GO:0007169	GPLD1 RUNX2 SIPA1L1 LGMN CDH13 PIK3CD SS18 GAREM1 LEPROT SMOC2 CCN2 MYO1E NDN CCBE1 JAK2 RAB14 SULF1 DDR2 NCOA5 CASS4 EMILIN1 LRIT3 SPRY2 HIP1R JCAD PIP4K2A RAB7A HRG OGT SLC9A6 FZD4 CBL UBASH3B ANGPT2 ADGRA2 NRG1 ADAMTS12 CHMP6 GRB2 SLC9A3R1 STAT3 ERBB3 NDRG4 NUCKS1 PDGFRB CDH3 CLEC14A CDK4 IL20RB STMN1 DLL1 PTPN11 PLAUR HGS INS GDF15 LRIG2 PID1 RAC1 FGF8 EFNA4 MVB12B RNF115 EPHA10 EPN2
0.017681	14	50	2.56717	Cytoplasmic stress granule	http://amigo.geneontology.org/amigo/term/GO:0010494	LSM14A PABPC4 PUM2 KHSRP ELAVL1 NANOS3 HNRNPK IGF2BP1 TIA1 YTHDF2 YBX1 EIF2S1 G3BP1 YTHDF1
0.017681	19	79	2.20507	Cell-Cell communication	https://reactome.org/download/current	PARVB CDH13 FBLIM1 CADM3 KIRREL1 ACTB LIMS1 CTNND1 NPHS2 CDH10 ITGB4 ILK IL20RB ARHGEF6 CADM1 FLNA VASP PLEC PXN
0.0185093	96	639	1.37742	Regulation of cell motility	http://amigo.geneontology.org/amigo/term/GO:2000145	SUN2 ACVRL1 GPLD1 MMP14 RIN3 LGMN CDH13 CFAP20 GPI PIK3CD PDPN RCC2 MAPRE2 DOCK7 SMOC2 CITED2 ATP5F1A TPM1 SEMA6D CCBE1 BMP4 ANXA1 TRIM32 SULF1 SDCBP DDR2 LMNA RHOC CCN1 DNAI3 DLC1 FERMT1 DDRGK1 CASS4 IL1R1 ATOH8 EMILIN1 SLIT2 DACH1 SPRY2 STK24 SEMA4D CORO1C PRKG1 JCAD ELP6 HRG MYLK SRPX2 PRR5L SWAP70 ICAM1 CALR PKN1 CAMK2A ST3GAL4 LAMB1 MGAT5 ANGPT2 ADGRA2 ACVR1 SLC9A3R1 STAT3 TMIGD1 NTN1 DAPK2 …
0.0185435	33	170	1.77976	DOID:1793 pancreatic cancer	ftp://ftp.rgd.mcw.edu/pub/data_release	CAP1 ARID1B RAD51 MTAP DPYD POLB ERCC4 MTR BAG3 MGMT XPC LDHA SMARCA4 ADGRE5 CACYBP ACVR1 ABCC3 MAP2K4 SNW1 ILK TGM2 ATM ALDH1A1 PALLD ANXA10 XRCC2 INS BAG4 RABL3 BCL2L1 PBRM1 AKT1 LRP2
0.0190185	8	20	3.66738	Apoptotic execution phase	https://reactome.org/download/current	H1-3 LMNA STK24 VIM SATB1 LMNB1 H1-4 PLEC
0.0190185	8	20	3.66738	Pyruvate metabolism	https://reactome.org/download/current	GSTZ1 PDP1 HAGH LDHA VDAC1 DLAT DLD PDHB
0.0190185	8	20	3.66738	DOID:898 autosomal dominant polycystic kidney disease	ftp://ftp.rgd.mcw.edu/pub/data_release	CDKN1A PKHD1 ANKS6 PKD1 LRP5 ANGPT2 BRD4 LRP2
0.0190185	15	56	2.45584	Telomere maintenance via telomere lengthening	http://amigo.geneontology.org/amigo/term/GO:0010833	HSP90AB1 HSP90AA1 MAP3K4 TCP1 RAD51 TERF1 CCT3 DCLRE1B ERCC4 CCT7 CCT4 HNRNPU DKC1 MAP2K7 ATM
0.0190185	8	20	3.66738	Cell redox homeostasis	http://amigo.geneontology.org/amigo/term/GO:0045454	TXNRD1 NQO1 TXN TXNRD2 DLD GSR GPX1 DDIT3
0.0190185	35	184	1.744	Regulation of transmembrane receptor protein serine/threonine kinase signaling pathway	http://amigo.geneontology.org/amigo/term/GO:0090092	EP300 ACVRL1 HSP90AB1 CITED2 CD109 RNF165 BMP4 JAK2 SULF1 SDCBP CCN1 FERMT1 CRIM1 EMILIN1 SPRY2 DKK1 SKIL IGSF1 GPC3 FBN2 ELAPOR2 SNX25 ACVR1 ITGA3 ZEB2 SNW1 ILK NRROS PBLD PMEPA1 FAM89B PIN1 CAV3 LRP2 SNX6
0.0191321	116	798	1.33276	Membrane protein complex	http://amigo.geneontology.org/amigo/term/GO:0098796	SUN2 ATP5F1B RIPK1 AP4S1 AP1G1 AMFR COX6B CATSPERG GJA10 SNX3 ATP5F1A AP4E1 KCNV2 PGM5 KCNQ3 SDCBP COPA KCNA3 LRRC8C SPTLC3 SEC23B AP5Z1 TFR2 STX1A UQCRC2 PKD1 ATP6V0C ABCG8 EMILIN1 ATP6V1C2 DIABLO CORO1C SNAP29 UFD1 RYR2 VPS26A SEC24C AP3M1 PKD2L1 KCNIP2 NDUFB6 RPN1 RAB7A ATP6V1A SLC25A5 STX3 CTNND1 KCNC1 PLEKHA7 TIMM29 CALR VDAC1 NDUFA2 LAMTOR1 VPS11 CBL SRPRA AKAP9 CACNA1E ACVR1 AGK CHCHD3 IL6…
0.0192729	13	45	2.64867	SH3 domain binding	http://amigo.geneontology.org/amigo/term/GO:0017124	AKAP5 WASF2 OSTF1 HIP1R HCLS1 RUFY1 CBL GRB2 KHDRBS1 ARHGAP31 GPX1 VASP WAS
0.0193448	31	157	1.81033	Ribosome biogenesis	http://amigo.geneontology.org/amigo/term/GO:0042254	SNU13 MDN1 RPS6 RCL1 EXOSC3 MRPS2 ESF1 CUL4A RAN PES1 EIF2A RPL24 DKC1 TRMT112 RPS28 UTP15 FASTKD2 NPM1 AATF RRP1B EIF6 RPL27 NVL YTHDF2 RPL26 NOL9 FBL RPL7 C1QBP RPL7A RPS25
0.0193584	80	516	1.42147	Cellular protein catabolic process	http://amigo.geneontology.org/amigo/term/GO:0044257	USP15 RIPK1 HSP90AB1 LGMN HSP90AA1 FBXO9 FBXO31 AMFR PARK7 UBE4B OMA1 CDC20 VPS4B CLPX PSMC6 TRIM32 SDCBP DDRGK1 UBE2C PKD1 UBA6 USP12 CUL4A CLU UFD1 IDE ATE1 RAB7A WWTR1 OGT DDB1 SGTA USP28 CBL PSMC2 KLHL20 EDEM3 DTL DNAJC10 CUL3 ADAMTS12 RNF180 SUMO2 PSME3 SPOP UBQLN1 RNF216 UCHL1 CTSB VPS35 ATP5IF1 PSMB1 KLHL15 RLIM CUL5 RACK1 LTN1 ATP13A2 DACT1 WFS1 USP42 ANAPC2 UBE2K GPX1 PDCL3 RBX1 PSME3IP1…
0.0196382	100	672	1.36435	Regulation of locomotion	http://amigo.geneontology.org/amigo/term/GO:0040012	SUN2 ACVRL1 GPLD1 MMP14 RIN3 LGMN CDH13 CFAP20 GPI PIK3CD PDPN RCC2 MAPRE2 DOCK7 SMOC2 CITED2 ATP5F1A TPM1 SEMA6D CCBE1 BMP4 ANXA1 TRIM32 SULF1 SDCBP DDR2 LMNA RHOC CCN1 DNAI3 DLC1 FERMT1 DDRGK1 CASS4 IL1R1 ATOH8 EMILIN1 SLIT2 DACH1 SPRY2 STK24 SEMA4D CORO1C PRKG1 JCAD ELP6 RYK HRG MYLK SRPX2 STX3 PRR5L SWAP70 ICAM1 CALR PKN1 CAMK2A ST3GAL4 LAMB1 MGAT5 ANGPT2 ADGRA2 ACVR1 TBR1 SLC9A3R1 STAT3 TMIG…
0.0197573	53	313	1.55249	Mitochondrion organization	http://amigo.geneontology.org/amigo/term/GO:0007005	EP300 HSP90AA1 PDCD5 CEBPA OMA1 ARMC1 LMNA PANK2 CAMKMT HIP1R DNA2 SAMD8 BLOC1S2 PRDX3 NDUFB6 CHCHD4 HSD17B10 SLC25A5 AIFM1 TIMM44 TIMM29 CDC37 SQSTM1 VDAC1 NDUFA2 COA4 PMPCB SSBP1 AGK CHCHD3 PHB OPTN VAT1 IMMT HMGCL VPS35 ATP5IF1 HIGD2A ATP13A2 NDUFB4 NDUFS3 PLAUR GPX1 BAG4 PID1 BCL2L1 ATP5F1D TMEM135 GCLM NDUFA5 ATF2 NDUFAF8 STOML2
0.0201196	29	144	1.84643	DOID:9000998 Brain Injuries	ftp://ftp.rgd.mcw.edu/pub/data_release	CDKN1A VEGFA CEBPA PTGER3 NT5E TJP1 JAK2 EIF3E IL1R1 VIM AIFM1 C3 DNMT1 PHB SERPINF1 RHOA PDGFRB SNW1 TARDBP G6PD CYP11A1 BCAT1 CUL5 PALLD AIF1 EIF2S1 GSN AKT1 CES1
0.0205185	25	118	1.94247	Focal adhesion	http://amigo.geneontology.org/amigo/term/GO:0005925	PARVB FBLIM1 MAPRE2 JAK2 PGM5 DLC1 FERMT1 CASS4 THSD1 TNFSF13B ACTN2 IRF2 SRP68 PHLDB2 ILK TNS1 FOCAD PALLD VASP GSN PLEC ARL14EP PXN LASP1 RALA
0.0205185	22	99	2.03744	Cytosolic ribosome	http://amigo.geneontology.org/amigo/term/GO:0022626	RPS11 RPS8 RPL4 RPS6 RPL30 RPL24 RPLP2 RPS28 RPS3 RPL19 RPS21 RPL27 RPL26 RPS9 RPL7 RPL35 RPS15A RPL32 RPS25 RPL15 RPL28 RPL3
0.0205185	9	25	3.30065	Cyclin binding	http://amigo.geneontology.org/amigo/term/GO:0030332	XRCC6 CDKN1A FBXO31 CRABP2 CUL3 GPS2 MDFIC CDK4 RACK1
0.0205185	6	12	4.58423	Proton-transporting ATP synthase activity, rotational mechanism	http://amigo.geneontology.org/amigo/term/GO:0046933	ATP5F1B ATP5F1A ATP6V1A ATP5F1C ATP5F1D ATP5PB
0.0205185	31	158	1.79888	Catalytic activity, acting on DNA	http://amigo.geneontology.org/amigo/term/GO:0140097	XRCC6 TDP2 POLG RUVBL2 ASCC3 INO80 RAD51 FANCM TERF1 POLB ERCC4 GEN1 DNA2 DNTT EXO1 APTX DKC1 SMARCA4 DNMT1 RPS3 PGBD5 CHD3 BRIP1 ERCC6L SMUG1 FEN1 TWNK XRCC2 RFFL BPTF G3BP1
0.0205185	22	99	2.03744	Centrosome cycle	http://amigo.geneontology.org/amigo/term/GO:0007098	MDM1 PKHD1 ATF5 CEP192 VPS4B CNTLN ODF2 NSFL1C GEN1 CHORDC1 CEP295 MCPH1 NPM1 CEP250 CHD3 CHMP1A TRIM37 CEP85 XRCC2 RBM4 RANBP1 NDE1
0.0205185	14	51	2.51683	Signaling by PTK6	https://reactome.org/download/current	ARHGAP35 STAP2 ARAP1 CBL NRG1 STAT3 ERBB3 RHOA KHDRBS1 CDK4 PTK6 RAC1 SFPQ PXN
0.0205185	14	51	2.51683	Signaling by Non-Receptor Tyrosine Kinases	https://reactome.org/download/current	ARHGAP35 STAP2 ARAP1 CBL NRG1 STAT3 ERBB3 RHOA KHDRBS1 CDK4 PTK6 RAC1 SFPQ PXN
0.0205185	6	12	4.58423	Apoptotic cleavage of cellular proteins	https://reactome.org/download/current	LMNA STK24 VIM SATB1 LMNB1 PLEC
0.0205185	28	138	1.86027	DOID:9007653 Multiple Abnormalities	ftp://ftp.rgd.mcw.edu/pub/data_release	EP300 COL11A2 VRK1 GRHL3 ARID1B SETBP1 EXOSC3 TRPS1 PANK2 EDN3 ACTB PKD1 SPAST EMILIN1 SLIT2 MN1 BAG3 OGT NAA10 LRP5 SMARCA4 ANAPC15 ALS2 PDGFRB CDH3 ATM VPS35 FOXG1
0.0205185	172	1255	1.25655	Cell population proliferation	http://amigo.geneontology.org/amigo/term/GO:0008283	XRCC6 ACVRL1 RARG TXNRD1 JARID2 GPLD1 CDKN1A RUNX2 PKHD1 TGM1 ARG2 LGMN CDH13 E2F4 PDCD5 CEBPA IL4I1 ATF5 PIK3CD GAREM1 DOCK7 CTPS1 CITED2 CCN2 ASCC3 HDAC2 CD109 ATP5F1A TPM1 COPS2 NDN SERPINB5 BMP4 RPS6 ANXA1 TNC TRIM32 EGFL7 MTBP PEX2 SULF1 TOX SDCBP DDR2 SPTA1 NES LMNA CRNN CCN1 DLC1 FERMT1 DDRGK1 ATOH8 FANCL SPDYA DACH1 SPRY2 TNFSF13B CUL4A CLU SART3 MN1 PES1 SMARCB1 PRKG1 PRDX3 HNRNPU LHX9 N…
0.0205185	14	51	2.51683	Purine ribonucleoside triphosphate biosynthetic process	http://amigo.geneontology.org/amigo/term/GO:0009206	ATP5F1B ATP5F1A ATP6V1A ATP5MC1 NME2 ATP5ME ATP5PD ALDOA ATP5MF ATP5F1C PID1 ATP5F1D ATP5PB STOML2
0.0205185	171	1247	1.25726	Tissue development	http://amigo.geneontology.org/amigo/term/GO:0009888	EP300 DDX17 ACVRL1 KRT84 RARG PTPRO YBX3 CECR2 TXNRD1 COL11A2 RUNX2 PKHD1 CFL2 TGM1 MMP14 ARG2 CCDC88C ITPK1 GSC ATP2C2 E2F4 GPI ARHGAP35 PIK3CD PDPN GRHL3 ACADM MTHFD1L CITED2 CCN2 CD109 TPM1 MYO1E LEO1 COPS2 SERPINB5 BMP4 BNC2 ANXA1 TNC RSPO2 SULF1 TOX SDCBP DDR2 LMNA PHGDH COL11A1 CNN3 CCN1 FERMT1 SLC24A3 DDRGK1 MYLK2 ACTB IFT140 PKD1 SEMA4C CNNM4 ATOH8 MATN3 SLIT2 RXFP1 POSTN SPRY2 CORO1C RYR…
0.0205185	9	25	3.30065	PW:0000071 valine leucine and isoleucine degradation pathway	ftp://ftp.rgd.mcw.edu/pub/data_release	IL4I1 AUH ACADS HSD17B10 MCCC2 ALDH3A2 HMGCL BCAT1 MCEE
0.0205185	7	16	4.0112	PW:0001778 propionic acidemia pathway	ftp://ftp.rgd.mcw.edu/pub/data_release	AUH ACADS HSD17B10 MCCC2 HMGCL BCAT1 MCEE
0.0205185	7	16	4.0112	PW:0001809 methylmalonate semialdehyde dehydrogenase deficiency pathway	ftp://ftp.rgd.mcw.edu/pub/data_release	AUH ACADS HSD17B10 MCCC2 HMGCL BCAT1 MCEE
0.0205185	7	16	4.0112	PW:0001810 methylmalonic acidemia pathway	ftp://ftp.rgd.mcw.edu/pub/data_release	AUH ACADS HSD17B10 MCCC2 HMGCL BCAT1 MCEE
0.0205185	7	16	4.0112	PW:0001870 maple syrup urine disease pathway	ftp://ftp.rgd.mcw.edu/pub/data_release	AUH ACADS HSD17B10 MCCC2 HMGCL BCAT1 MCEE
0.0205185	7	16	4.0112	PW:0001874 isovaleric acidemia pathway	ftp://ftp.rgd.mcw.edu/pub/data_release	AUH ACADS HSD17B10 MCCC2 HMGCL BCAT1 MCEE
0.0205185	7	16	4.0112	PW:0001875 isobutyryl-CoA dehydrogenase deficiency pathway	ftp://ftp.rgd.mcw.edu/pub/data_release	AUH ACADS HSD17B10 MCCC2 HMGCL BCAT1 MCEE
0.0205185	7	16	4.0112	PW:0002274 3-methylglutaconic aciduria type 1 pathway	ftp://ftp.rgd.mcw.edu/pub/data_release	AUH ACADS HSD17B10 MCCC2 HMGCL BCAT1 MCEE
0.0205185	7	16	4.0112	PW:0002275 3-methylglutaconic aciduria type 3 pathway	ftp://ftp.rgd.mcw.edu/pub/data_release	AUH ACADS HSD17B10 MCCC2 HMGCL BCAT1 MCEE
0.0205185	7	16	4.0112	PW:0002323 3-hydroxy-3-methylglutaryl-CoA lyase deficiency pathway	ftp://ftp.rgd.mcw.edu/pub/data_release	AUH ACADS HSD17B10 MCCC2 HMGCL BCAT1 MCEE
0.0205185	7	16	4.0112	PW:0002569 3-hydroxyisobutyric aciduria pathway	ftp://ftp.rgd.mcw.edu/pub/data_release	AUH ACADS HSD17B10 MCCC2 HMGCL BCAT1 MCEE
0.0205185	7	16	4.0112	PW:0002576 3-methylcrotonyl CoA carboxylase 1 deficiency pathway	ftp://ftp.rgd.mcw.edu/pub/data_release	AUH ACADS HSD17B10 MCCC2 HMGCL BCAT1 MCEE
0.0205185	12	40	2.75054	Viral transcription	http://amigo.geneontology.org/amigo/term/GO:0019083	EP300 TRIM32 GTF2B SMARCB1 RAPSN SMARCA4 RRP1B MDFIC NUCKS1 SNW1 TARDBP TRIM14
0.0205185	9	25	3.30065	Arp2/3 complex-mediated actin nucleation	http://amigo.geneontology.org/amigo/term/GO:0034314	DNAI3 ARPC1B HIP1R ARPC3 ARPC4 ARPC5 ACTR3 GMFB WAS
0.0205185	45	256	1.61164	Negative regulation of phosphorylation	http://amigo.geneontology.org/amigo/term/GO:0042326	PTPRO CDKN1A PARK7 CD109 BMP4 EMILIN1 SLIT2 SPRY2 SEMA4D DYNLL1 CORO1C DKK1 PRDX3 HNRNPU PIP4K2A PRKAR2A WWTR1 LRP5 PRR5L PKN1 RGS14 CHORDC1 UBASH3B NIBAN1 SNX25 DNAJC10 NPM1 CHMP6 STAT3 GGNBP2 UCHL1 TARDBP PIBF1 TRAF3IP1 IL20RB PBLD CEP85 RACK1 PTK6 CTDSP2 PMEPA1 PID1 PPM1E UBE2B CAV3
0.0205185	163	1181	1.26542	Positive regulation of RNA metabolic process	http://amigo.geneontology.org/amigo/term/GO:0051254	XRCC6 EP300 DDX17 ACVRL1 RARG RIPK1 TFEB RUNX2 BNC1 SIN3A NRL CDH13 E2F4 CEBPA RUVBL2 IL4I1 ATF5 NR1H2 PARK7 GRHL3 SS18 PNLDC1 CITED2 NCOA7 HDAC2 ICE2 TCF12 LEO1 CAPN3 INO80 NDN BMP4 EXOSC3 RIDA COPS5 RXRG ATF6 GLMP CCN1 DDRGK1 TFR2 PKD1 ZC3H8 ATOH8 MAML3 NAA15 ZNF395 YWHAH SMARCB1 ECD CTBP2 HNRNPU SLC38A3 TADA3 NR2C2 XPC WWTR1 MECOM HCLS1 PAXBP1 MED14 PHF8 MED12 OGT RBMX IRF7 LRP5 RELA TRMT112 R…
0.0205185	58	351	1.51502	Plasma membrane bounded cell projection assembly	http://amigo.geneontology.org/amigo/term/GO:0120031	PARVB MYO1A PTPRO MAK PKHD1 GAS8 CDH13 E2F4 CFAP20 ARHGAP35 RCC2 UBXN10 WASF2 IFT140 SLIT2 FHDC1 ARHGEF7 NEK1 CORO1C SNAP29 ACTN2 ABLIM1 ARMC4 WWTR1 HRG MYLK ICAM1 ARAP1 HOATZ ACTR3 CEP41 DBNL MYO10 SPEF2 SEPTIN9 ITGB4 SLC9A3R1 CDC42EP4 CEP250 TAPT1 CARMIL2 DNAI2 PIBF1 IL20RB YAP1 AIF1 ATP6V1D FLNA BAG4 RAC1 CLN3 WAS RAB5A WDR60 UBE2B PALM RP1 RALA
0.0205185	14	51	2.51683	Positive regulation of mitotic cell cycle phase transition	http://amigo.geneontology.org/amigo/term/GO:1901992	SIN3A RCC2 VPS4B ANXA1 MTBP UBE2C CUL4A DTL CUL3 MEPCE CDK4 AIF1 MECP2 DBF4B
0.0207882	11	35	2.88152	Disulfide oxidoreductase activity	http://amigo.geneontology.org/amigo/term/GO:0015036	TXNRD1 GLRX5 TXNL1 TXN TXNRD2 CHCHD4 GSR DNAJC10 NXN SH3BGRL3 TXNDC17
0.0207882	11	35	2.88152	Actin filament depolymerization	http://amigo.geneontology.org/amigo/term/GO:0030042	CFL2 TMOD2 TMOD4 ACTN2 CFL1 SWAP70 LMOD2 CARMIL2 CAPZA2 WDR1 GSN
0.0207882	11	35	2.88152	Regulation of alternative mRNA splicing, via spliceosome	http://amigo.geneontology.org/amigo/term/GO:0000381	DDX17 WTAP RNPS1 HNRNPU RBM15B RBMX KHDRBS1 RBM8A THRAP3 TRA2B DDX5
0.0208472	26	125	1.90704	Cell-substrate junction	http://amigo.geneontology.org/amigo/term/GO:0030055	PARVB FBLIM1 MAPRE2 JAK2 PGM5 DLC1 FERMT1 CASS4 THSD1 TNFSF13B ACTN2 IRF2 SRP68 ITGB4 PHLDB2 ILK TNS1 FOCAD PALLD VASP GSN PLEC ARL14EP PXN LASP1 RALA
0.0209182	10	30	3.05615	Cajal body	http://amigo.geneontology.org/amigo/term/GO:0015030	SNRPC ICE2 ZC3H8 SART3 NOLC1 DKC1 ANGEL2 EFTUD2 SRRM2 FBL
0.0209182	10	30	3.05615	Mediator complex	http://amigo.geneontology.org/amigo/term/GO:0016592	CCNC CDK8 MED14 MED12 MED17 MED11 MED9 THRAP3 MED22 MED20
0.0209182	10	30	3.05615	Protein-disulfide reductase activity	http://amigo.geneontology.org/amigo/term/GO:0015035	TXNRD1 GLRX5 TXN TXNRD2 CHCHD4 GSR DNAJC10 NXN SH3BGRL3 TXNDC17
0.0209182	10	30	3.05615	DOID:3347 osteosarcoma	ftp://ftp.rgd.mcw.edu/pub/data_release	VEGFA RUNX2 CITED2 HSD17B10 SERPINF1 BRD4 AKAP12 RGS1 EIF2S1 AKT1
0.0209182	10	30	3.05615	Regulation of actin filament depolymerization	http://amigo.geneontology.org/amigo/term/GO:0030834	CFL2 TMOD2 TMOD4 ACTN2 SWAP70 LMOD2 CARMIL2 CAPZA2 WDR1 GSN
0.0209182	10	30	3.05615	MRNA stabilization	http://amigo.geneontology.org/amigo/term/GO:0048255	HNRNPU ELAVL1 ANGEL2 AXIN2 MEIOC TIRAP TARDBP IGF2BP1 YBX1 THRAP3
0.0209182	10	30	3.05615	Regulation of intrinsic apoptotic signaling pathway in response to DNA damage	http://amigo.geneontology.org/amigo/term/GO:1902229	TRIM32 CLU SKIL RPS3 ACKR3 HNRNPK RPL26 TMEM161A BCL2L1 TPT1
0.0217452	23	106	1.98938	Purine ribonucleotide biosynthetic process	http://amigo.geneontology.org/amigo/term/GO:0009152	ATP5F1B ACOT7 ATP5F1A ACSS1 PANK2 PAICS ATP6V1A ATP5MC1 NME2 AMPD3 ATP5ME PDHB PPCDC AK2 ATP5PD ALDOA ATP5MF ATP5F1C HPRT1 PID1 ATP5F1D ATP5PB STOML2
0.0218329	16	63	2.3285	Positive regulation of chromosome organization	http://amigo.geneontology.org/amigo/term/GO:2001252	PPHLN1 MAP3K4 TCP1 CCT3 CCT7 CCT4 DKC1 MAP2K7 DNMT1 TPR SSBP1 ATM SHCBP1L FEN1 SFPQ TRIM28
0.0218329	16	63	2.3285	Cell junction organization	https://reactome.org/download/current	PARVB CDH13 FBLIM1 CADM3 ACTB LIMS1 CTNND1 CDH10 ITGB4 ILK ARHGEF6 CADM1 FLNA VASP PLEC PXN
0.0220339	13	46	2.59109	MRNA Splicing-Minor Pathway	https://reactome.org/download/current	SNU13 SNRPF SRSF7 SNRPD3 SF3B1 EFTUD2 SRSF1 SNRPE SNRPG NCBP2 YBX1 GTF2F2 LSM2
0.0220739	88	582	1.3863	Tube morphogenesis	http://amigo.geneontology.org/amigo/term/GO:0035239	ACVRL1 RARG CECR2 GPLD1 PKHD1 CDH13 ARHGAP35 PIK3CD GRHL3 WASF2 SMOC2 MTHFD1L CITED2 CCN2 MYO1E TJP1 CCBE1 BMP4 ANXA1 RSPO2 YWHAZ SULF1 CCN1 PANK2 GTF2I PKD1 SEMA4C ATOH8 EMILIN1 SLIT2 SPRY2 MYO18B RYR2 JCAD STAB1 HRG MYLK MED12 SRPX2 GPC3 LRP5 PPP1CA C3 FZD4 CSMD1 ANGPT2 ADGRA2 ACVR1 FZD5 ACKR3 HOXA5 ADAMTS12 ISL1 STAT3 FKBP10 SERPINF1 NTN1 RHOA ILK HSPB6 TGM2 CLEC14A DVL2 SERPINE1 DLL1 XBP1 YAP…
0.0220906	18	75	2.20043	Positive regulation of mitotic cell cycle	http://amigo.geneontology.org/amigo/term/GO:0045931	SIN3A LGMN RCC2 SMOC2 VPS4B ANXA1 MTBP UBE2C CUL4A ASNS DTL CUL3 MEPCE CDK4 PTPN11 AIF1 MECP2 DBF4B
0.0222619	71	451	1.44337	Tissue morphogenesis	http://amigo.geneontology.org/amigo/term/GO:0048729	ACVRL1 RARG CECR2 TXNRD1 PKHD1 GPI ARHGAP35 PIK3CD PDPN GRHL3 MTHFD1L CITED2 TPM1 SERPINB5 BMP4 TNC RSPO2 SULF1 COL11A1 CCN1 FERMT1 MYLK2 ACTB PKD1 SEMA4C SLIT2 SPRY2 RYR2 DKK1 RYK MYLK MED12 GPC3 LRP5 PPP1CA CSMD1 NRG1 ACVR1 FZD5 EXOC4 HOXA5 ADAMTS12 ISL1 ITGB4 GRB2 SLC9A3R1 HOXB4 ITGA3 NTN1 RHOA PHLDB2 CARMIL2 LIN7C ILK TGM2 TRAF3IP1 DVL2 DLL1 YAP1 FLNA FGF8 VASP WDR1 TRIM28 MYL2 NKD1 CAV3 EYA1…
0.0225602	41	229	1.64152	Negative regulation of cell cycle	http://amigo.geneontology.org/amigo/term/GO:0045786	MDM1 CDKN1A PPP1R13B FBXO31 CEBPA ATF5 RPA2 TTK BMP4 MTBP GEN1 CUL4A DNA2 BRINP3 XPC TPRA1 NAA10 ANAPC15 USP28 TPR ANGEL2 RAD1 NPM1 SLC9A3R1 MEIOC ZNF207 TAOK1 RPS27L CHMP1A TRIM37 ATM ZWINT RPL26 PTPN11 CTDSP2 DACT1 TAF6 RBM4 ATF2 KANK2 ZNF830
0.0231078	24	113	1.94728	Cellular response to radiation	http://amigo.geneontology.org/amigo/term/GO:0071478	XRCC6 EP300 CDKN1A RUVBL2 INO80 RAD51 ERCC4 XPC DDB1 TMEM109 MMP1 USP28 RAD1 NPM1 GRB2 NUCKS1 RPL26 YAP1 TMEM161A EIF2S1 BCL2L1 CRYAB ADIRF RP1
0.0236077	21	94	2.04827	Regulation of transforming growth factor beta receptor signaling pathway	http://amigo.geneontology.org/amigo/term/GO:0017015	EP300 HSP90AB1 CITED2 CD109 SDCBP FERMT1 EMILIN1 SPRY2 SKIL FBN2 SNX25 ITGA3 ZEB2 SNW1 NRROS PBLD PMEPA1 FAM89B PIN1 CAV3 SNX6
0.0236181	51	302	1.54832	Cell-cell signaling by wnt	http://amigo.geneontology.org/amigo/term/GO:0198738	PTPRO DAAM2 CCDC88C GSC AMFR RUVBL2 DRAXIN GRHL3 SNX3 RSPO2 SULF1 FERMT1 PKD1 ATP6V1C2 DKK1 RYK WWTR1 MED12 GPC3 LRP5 DDB1 CTNND1 DKK3 SMARCA4 FZD4 BCL9L ADGRA2 FZD5 CUL3 ISL1 SLC9A3R1 AXIN2 ITGA3 ZEB2 MDFIC TRPM4 AMER2 CDH3 ILK DVL2 NXN NDP YAP1 DACT1 TLE5 G3BP1 RAB5A UBE2B PIN1 NKD1 DDIT3
0.0237729	14	52	2.46843	Organelle envelope lumen	http://amigo.geneontology.org/amigo/term/GO:0031970	TUBB IGF2R FBXL4 PANK2 TIMM8A AIFM1 TIMM29 COA4 CACYBP AGK NLN FKBP10 IMMT STOML2
0.0239537	12	41	2.68345	Actin filament bundle	http://amigo.geneontology.org/amigo/term/GO:0032432	FBLIM1 TPM1 PGM5 SEPTIN11 ABLIM1 NEBL MYLK TPM4 SEPTIN9 PALLD RFLNA MARCKS
0.0239537	12	41	2.68345	Translation initiation factor activity	http://amigo.geneontology.org/amigo/term/GO:0003743	EIF3K EIF3I EIF3J EIF3E DENR EIF2A EIF2B5 EIF3M EIF4G2 EIF4E1B EIF2S1 EIF5
0.0239537	12	41	2.68345	Regulation of centrosome cycle	http://amigo.geneontology.org/amigo/term/GO:0046605	MDM1 PKHD1 ATF5 VPS4B GEN1 CHORDC1 CEP295 MCPH1 NPM1 CHMP1A TRIM37 RBM4
0.0245919	8	21	3.49275	DOID:0050426 Stevens-Johnson syndrome	ftp://ftp.rgd.mcw.edu/pub/data_release	EP300 NUCB1 PTGER3 COPS5 CUL4A CLU CELF2 NFKBIZ
0.0245919	33	174	1.73885	Negative regulation of cell cycle process	http://amigo.geneontology.org/amigo/term/GO:0010948	MDM1 CDKN1A FBXO31 ATF5 RPA2 TTK BMP4 MTBP GEN1 CUL4A DNA2 XPC TPRA1 NAA10 ANAPC15 USP28 TPR RAD1 NPM1 ZNF207 TAOK1 RPS27L TRIM37 ATM ZWINT RPL26 PTPN11 CTDSP2 DACT1 RBM4 ATF2 KANK2 ZNF830
0.0245919	28	140	1.83369	Endosomal transport	http://amigo.geneontology.org/amigo/term/GO:0016197	AKAP5 TMEM87A VPS4B RAB14 AP5Z1 GCC2 DPY30 CORO1C ACTN2 LYST VPS26A GRIP2 RAB7A LAMTOR1 CCDC93 ALS2 EHD4 NDRG4 CLTC VPS50 SNX17 VPS35 VPS35L VPS36 RBSN WAS ALMS1 SNX6
0.0247927	15	58	2.37115	Regulation of response to endoplasmic reticulum stress	http://amigo.geneontology.org/amigo/term/GO:1905897	NR1H2 PARK7 TXNDC12 COPS5 ATF6 DDRGK1 CLU ERP29 SGTA UBQLN1 IL20RB XBP1 WFS1 BCL2L1 HERPUD1
0.0249543	137	976	1.28697	Regulation of transport	http://amigo.geneontology.org/amigo/term/GO:0051049	PACSIN2 BICD1 CRACR2A RIPK1 TRIM15 C2 MFGE8 CPLX3 AKAP5 RIN3 ATP2C2 CDH13 AP1G1 PDCD5 NR1H2 PARK7 SNX3 CAPN3 SCG5 VPS4B BMP4 ANXA1 CA2 CRH SDCBP CD84 CASQ1 LOC100154179 KCNA3 FERMT1 MYLK2 ACTB TFR2 STX1A GCC2 ABCG8 HADH ARHGEF7 LAMP1 CLU RAN HIP1R ERP29 ANKRD13A YWHAH RYR2 ACTN2 DKK1 KCNIP2 BAG3 KIF5B EFHB BSN RAB7A NLGN1 MYLK HCLS1 IL1RAPL1 CDK16 SLC25A5 GPC3 LRP5 PRR5L C3 CALR AKAP8L RUFY1 CRHB…
0.025286	16	64	2.29212	Synaptic vesicle	http://amigo.geneontology.org/amigo/term/GO:0008021	CPLX3 COPS5 SYPL2 STX1A SEMA4C LAMP1 CDK16 TMED9 ICA1 SYPL1 SYN2 GABRA2 SYNGR2 SNAPIN CLN3 PPT1
0.025286	26	127	1.87701	DOID:0050700 cardiomyopathy	ftp://ftp.rgd.mcw.edu/pub/data_release	EP300 PPP1R1A VEGFA POLG TPM1 RAD51 LMNA MYLK2 YWHAH RYR2 BAG3 NEBL LDHA AKAP9 TRPM4 DSG2 SSUH2 ILK DTNA PTPN11 CS CRYAB ALMS1 AKT1 MYL2 TNNI3
0.025286	22	101	1.99709	Aerobic respiration	http://amigo.geneontology.org/amigo/term/GO:0009060	DLST PARK7 ATP5F1A PANK2 IDE NDUFB6 UQCRC1 NDUFS6 SDHA RHOA ISCU COX5A COQ9 MDH1 FH NDUFS3 IDH3A ATP5F1C ATP5F1D SHMT2 ATP5PB STOML2
0.025286	18	76	2.17148	Regulation of gene expression, epigenetic	http://amigo.geneontology.org/amigo/term/GO:0040029	EP300 PPHLN1 HNRNPU RBM15B MORC1 PHF8 DNMT1 TPR WBP2 H3F3B CTCF RLIM SMCHD1 PCGF3 MACROH2A2 GPX1 MECP2 TRIM28
0.0253178	43	245	1.60916	Purine nucleotide metabolic process	http://amigo.geneontology.org/amigo/term/GO:0006163	EP300 ATP5F1B GPI ACOT7 NT5E ATP5F1A ACSS1 PANK2 PAICS RAN HK1 ADK PGAM1 OXSM QRICH1 ATP6V1A OGT GUK1 GALK1 STAT3 ATP5MC1 NME2 ACACA PIPOX AMPD3 EIF6 ATP5ME SLC2A6 PDHB GMPR PPCDC AK2 ATP5PD ALDOA INS ATP5MF ATP5F1C HPRT1 PID1 ATP5F1D MCEE ATP5PB STOML2
0.0253688	17	70	2.22663	Modulation of process of other organism	http://amigo.geneontology.org/amigo/term/GO:0035821	EP300 IGF2R GSDMD VAPB SMARCB1 PC RAPSN SMARCA4 PHB RRP1B NUCKS1 SNW1 TARDBP BCL2L1 TBC1D20 STOM APCS
0.0256841	57	348	1.50173	Positive regulation of cell migration	http://amigo.geneontology.org/amigo/term/GO:0030335	SUN2 GPLD1 MMP14 LGMN CDH13 GPI PIK3CD PDPN MAPRE2 DOCK7 SMOC2 ATP5F1A SEMA6D CCBE1 BMP4 ANXA1 TRIM32 SDCBP DDR2 RHOC CCN1 FERMT1 DDRGK1 CASS4 IL1R1 ATOH8 SPRY2 SEMA4D JCAD ELP6 MYLK SRPX2 SWAP70 ICAM1 CALR LAMB1 MGAT5 ADGRA2 ACVR1 STAT3 DAPK2 RHOA CARMIL2 PDGFRB SERPINE1 RACK1 XBP1 GLIPR2 FAM110C AIF1 SASH1 BAG4 C1QBP RAC1 FAM89B CEMIP HMOX1
0.025851	183	1355	1.23825	Nervous system development	http://amigo.geneontology.org/amigo/term/GO:0007399	EP300 SUN2 RARG PTPRO CECR2 AMIGO2 TDP2 DAAM2 HSP90AB1 SIN3A HEXA NRL SIPA1L1 ITPK1 GSC ARHGAP35 ATF5 DRAXIN GRHL3 ADGRL2 DOCK7 CDC20 MTHFD1L ADGRG6 CITED2 RIMS1 GJA10 RNF165 TCF12 SEMA6D NDN LRFN5 BMP4 TNC TRIM32 RSPO2 YWHAZ SULF1 TOX UFC1 IGSF9 CRABP2 BCAN PHGDH GNAT2 IFT140 PKD1 SEMA4C CTNNA2 PEX13 DPYSL5 SLIT2 UBA6 STK24 SEMA4D CLU YWHAH PRKG1 LGI1 OPALIN DPCD KCNIP2 INA BRINP3 NAV1 VIM ARMC4…
0.0260655	27	134	1.84738	DOID:2843 long QT syndrome	ftp://ftp.rgd.mcw.edu/pub/data_release	PTOV1 RIMS1 MDN1 TPM1 LMNA PLCB4 ELMOD2 RYR2 DNA2 AKAP8 ANKRD31 ERAP1 AKAP9 SND1 NRIP1 TDRD6 KIF21B WWC2 ZNF341 TRPM4 DSG2 SSUH2 ILK FASTK RALGAPA1 STK32B DYNLRB1
0.0260655	27	134	1.84738	Establishment of protein localization to membrane	http://amigo.geneontology.org/amigo/term/GO:0090150	AKAP5 HSP90AA1 PDCD5 FRMPD1 GRIP2 RAB7A STX3 SGTA TIMM29 SRPRA GORASP2 ACSL3 AGK SRP68 RAB34 OPTN SRP19 VPS35 EMC7 COLQ SEC62 GRIN3B RACK1 SSR3 CLN3 STOM CEMIP
0.0262073	13	47	2.53596	Alternative mRNA splicing, via spliceosome	http://amigo.geneontology.org/amigo/term/GO:0000380	DDX17 WTAP RNPS1 HNRNPU RBM15B RBMX SRSF1 KHDRBS1 RBM8A THRAP3 TRA2B DDX5 SFPQ
0.0263887	10	31	2.95757	Tetrapyrrole metabolic process	http://amigo.geneontology.org/amigo/term/GO:0033013	CYP1A2 SPTA1 HMOX2 MTR PGRMC1 BLVRB ATP5IF1 SLC11A2 ABCD4 HMOX1
0.0265284	73	470	1.42404	DOID:10283 prostate cancer	ftp://ftp.rgd.mcw.edu/pub/data_release	EP300 MYO1A PPP6R2 CDKN1A BICRAL VEGFA PKHD1 GPHN NEK9 TSNAXIP1 RCC2 AMD1 KCNQ3 MTBP CPA6 CADM3 DPYD PLCB4 EMILIN1 URB2 SORBS1 PKD2L1 BTBD16 ARPP21 SKIL MYLK CHAF1B PHF8 AIFM1 SLC25A22 CPSF7 SMARCA4 DNMT1 FBN2 VDAC1 USP28 KLHL20 OLA1 ACSL3 CTTNBP2 CBX1 KIAA0100 KMT2C ERBB3 SPOP ENOX1 HIPK4 PDGFRB CDH3 ILK SLC5A2 SMUG1 SHCBP1L DLL1 RLIM IRGQ DPH7 MAGI2 CADM1 PYCR3 GABRB2 INS ZMAT3 PMEPA1 TMEM94 TR…
0.0266444	36	196	1.684	Cellular response to abiotic stimulus	http://amigo.geneontology.org/amigo/term/GO:0071214	XRCC6 EP300 YBX3 GPLD1 CDKN1A SLC12A6 RUVBL2 CAPN3 INO80 RAD51 ERCC4 HVCN1 PKD2L1 BAG3 SLC38A3 XPC MYLK DDB1 TMEM109 MMP1 USP28 RAD1 NPM1 GRB2 MAP2K4 NUCKS1 RPL26 YAP1 TMEM161A EIF2S1 BCL2L1 CLN3 CRYAB ADIRF PALM RP1
0.0266444	36	196	1.684	Cellular response to environmental stimulus	http://amigo.geneontology.org/amigo/term/GO:0104004	XRCC6 EP300 YBX3 GPLD1 CDKN1A SLC12A6 RUVBL2 CAPN3 INO80 RAD51 ERCC4 HVCN1 PKD2L1 BAG3 SLC38A3 XPC MYLK DDB1 TMEM109 MMP1 USP28 RAD1 NPM1 GRB2 MAP2K4 NUCKS1 RPL26 YAP1 TMEM161A EIF2S1 BCL2L1 CLN3 CRYAB ADIRF PALM RP1
0.0278489	26	128	1.86234	Mitochondrial transport	http://amigo.geneontology.org/amigo/term/GO:0006839	HSP90AA1 PDCD5 ATP5F1A HIP1R SAMD8 BLOC1S2 CHCHD4 SLC25A5 AIFM1 TIMM44 TIMM29 SFXN1 VDAC1 PMPCB AGK VPS35 ATP5IF1 SLC25A11 SLC25A6 ATP5F1C BAG4 BCL2L1 ATP5F1D ATP5PB ATF2 STOML2
0.0278489	14	53	2.42186	Post-Golgi vesicle-mediated transport	http://amigo.geneontology.org/amigo/term/GO:0006892	AP1G1 RAB14 ARFGEF2 LAMP1 DOP1B KLHL20 CCDC93 ACSL3 RAB34 OPTN VPS35L RACK1 CLN3 RBSN
0.0278489	122	858	1.30367	Cell-cell signaling	http://amigo.geneontology.org/amigo/term/GO:0007267	PACSIN2 PTPRO SLC44A4 ITPR3 DAAM2 CPLX3 AKAP5 CCDC88C LGMN GSC AMFR RUVBL2 DRAXIN GRHL3 CDC20 SNX3 TMOD2 SCG5 BMP4 ANXA1 TNC RSPO2 SULF1 CRH SDCBP FERMT1 PLCB4 MYLK2 TFR2 STX1A PKD1 ATP6V1C2 HADH ARHGEF7 RPH3A RYR2 DKK1 CCDC186 CTBP2 KIF5B STAB1 RYK WWTR1 NLGN1 IL1RAPL1 CDK16 MED12 GPR119 GPC3 LRP5 RELA DDB1 STX3 CTNND1 RAPSN DKK3 C3 SMARCA4 SQSTM1 RGS14 CRHBP RASGRF2 VDAC1 FZD4 BCL9L AKAP9 ICA1 …
0.0280376	3	3	9.16846	Ankyrin repeat binding	http://amigo.geneontology.org/amigo/term/GO:0071532	TERF1 HIF1AN RELA
0.0280376	3	3	9.16846	Pentose-phosphate shunt, oxidative branch	http://amigo.geneontology.org/amigo/term/GO:0009051	PGD G6PD H6PD
0.0280376	3	3	9.16846	PW:0000573 pentose phosphate pathway-oxidative phase	ftp://ftp.rgd.mcw.edu/pub/data_release	PGD PGLS G6PD
0.0280376	40	225	1.62995	Negative regulation of protein phosphorylation	http://amigo.geneontology.org/amigo/term/GO:0001933	PTPRO CDKN1A PARK7 CD109 BMP4 EMILIN1 SLIT2 SPRY2 SEMA4D CORO1C DKK1 PRKAR2A WWTR1 LRP5 PRR5L PKN1 RGS14 CHORDC1 UBASH3B NIBAN1 SNX25 DNAJC10 NPM1 CHMP6 GGNBP2 UCHL1 TARDBP PIBF1 TRAF3IP1 IL20RB PBLD CEP85 RACK1 PTK6 CTDSP2 PMEPA1 PID1 PPM1E UBE2B CAV3
0.0280376	3	3	9.16846	Terminal button organization	http://amigo.geneontology.org/amigo/term/GO:0072553	NLGN1 VPS35 SNAPIN
0.0280376	3	3	9.16846	Norrin signaling pathway	http://amigo.geneontology.org/amigo/term/GO:0110135	LRP5 FZD4 NDP
0.0281541	39	218	1.64023	Thermogenesis	http://www.genome.jp/kegg-bin/show_pathway?ssc04714	ATP5F1B COX6B ARID1B ATP5F1A RPS6 ACTB TFR2 UQCRC2 COX5B LOC100516606 SMARCB1 PRKG1 NDUFB6 UQCRC1 CPT1A SMARCA4 NDUFA2 COA4 GCG ACSL3 NDUFS6 GRB2 ATP5MC1 SDHA NDUFV3 ATP5ME NDUFS7 COX5A CPT1C LOC100624067 NDUFB4 CYC1 NDUFS3 ATP5PD ATP5F1C ATP5F1D ATP5PB NDUFA5 ATF2
0.0281766	5	9	5.09359	Positive regulation of establishment of protein localization to telomere	http://amigo.geneontology.org/amigo/term/GO:1904851	TCP1 CCT3 CCT7 CCT4 DKC1
0.0281766	5	9	5.09359	X chromosome	http://amigo.geneontology.org/amigo/term/GO:0000805	SIN3B H3F3B SMCHD1 PCGF3 MACROH2A2
0.0281766	5	9	5.09359	Arp2/3 protein complex	http://amigo.geneontology.org/amigo/term/GO:0005885	ARPC1B ARPC3 ARPC4 ARPC5 ACTR3
0.0281766	33	176	1.71909	Formation of a pool of free 40S subunits	https://reactome.org/download/current	RPS18 EIF3K RPS11 EIF3I RPS8 EIF3J RPS6 EIF3E RPL30 RPS3A RPLP2 EIF3M RPS28 RPL19 RPS21 RPS27L RPL13 RPS17 RPL29 RPL26 RPS7 RPL7 RPS15 RPS2 RPL35 RPL17 RPL23A RPS15A RPL32 RPS25 RPL23 RPL28 RPS24
0.0281766	5	9	5.09359	Initiation of Nuclear Envelope Reformation	https://reactome.org/download/current	VRK1 LMNA BANF1 LMNB1 EMD
0.0281766	5	9	5.09359	Nuclear Envelope Reassembly	https://reactome.org/download/current	VRK1 LMNA BANF1 LMNB1 EMD
0.0281766	5	9	5.09359	SLBP independent Processing of Histone Pre-mRNAs	https://reactome.org/download/current	SNRPF SNRPD3 SNRPE SNRPG NCBP2
0.0281766	53	320	1.51853	DOID:1909 melanoma	ftp://ftp.rgd.mcw.edu/pub/data_release	EP300 PTPRO AMIGO2 CDKN1A VEGFA PKHD1 GPT2 EPB41 ECHDC1 HDAC2 MTO1 BMP4 MTAP TNC KCNQ3 CPA6 DPYD ABCA4 PLCB4 QPCT CLU MN1 SMARCB1 RYR2 PRKG1 MGMT PIP4K2A MYLK IL1RAPL1 LRP5 MRPL49 SAC3D1 C3 FBN2 RPS3 CLNS1A CBL GRM3 SF3B1 CUL3 ADAMTS13 BRD4 CPT1C ATM ALDH1A1 RAC1 BCL2L1 JMJD6 ALMS1 CRNKL1 PLEC AKT1 LRP2
0.0281766	5	9	5.09359	DOID:5132 leiomyoma cutis	ftp://ftp.rgd.mcw.edu/pub/data_release	RYR2 RGS7 EXO1 FH CHML
0.0281766	5	9	5.09359	DOID:589 congenital hemolytic anemia	ftp://ftp.rgd.mcw.edu/pub/data_release	SPTA1 ABCG8 C3 GSR G6PD
0.0281766	50	298	1.53833	Wnt signaling pathway	http://amigo.geneontology.org/amigo/term/GO:0016055	PTPRO DAAM2 CCDC88C GSC AMFR RUVBL2 DRAXIN GRHL3 SNX3 RSPO2 SULF1 FERMT1 ATP6V1C2 DKK1 RYK WWTR1 MED12 GPC3 LRP5 DDB1 CTNND1 DKK3 SMARCA4 FZD4 BCL9L ADGRA2 FZD5 CUL3 ISL1 SLC9A3R1 AXIN2 ITGA3 ZEB2 MDFIC TRPM4 AMER2 CDH3 ILK DVL2 NXN NDP YAP1 DACT1 TLE5 G3BP1 RAB5A UBE2B PIN1 NKD1 DDIT3
0.0284783	16	65	2.25685	Ribonucleoside triphosphate metabolic process	http://amigo.geneontology.org/amigo/term/GO:0009199	ATP5F1B CTPS1 ATP5F1A RAN ATP6V1A ATP5MC1 NME2 ATP5ME ATP5PD ALDOA ATP5MF ATP5F1C PID1 ATP5F1D ATP5PB STOML2
0.0284783	106	731	1.32949	Tube development	http://amigo.geneontology.org/amigo/term/GO:0035295	EP300 ACVRL1 RARG CECR2 GPLD1 PKHD1 CYP1A2 ARG2 ITPK1 GSC CDH13 CEBPA ARHGAP35 PIK3CD GRHL3 WASF2 SMOC2 MTHFD1L CITED2 CCN2 MYO1E TJP1 CCBE1 BMP4 ANXA1 RSPO2 YWHAZ SULF1 PHGDH CCN1 PANK2 GTF2I IFT140 PKD1 SEMA4C ATOH8 EMILIN1 SLIT2 RXFP1 SPRY2 MYO18B RYR2 JCAD STAB1 WWTR1 HRG MYLK MED12 SRPX2 GPC3 LRP5 PPP1CA C3 FZD4 CSMD1 ANGPT2 ADGRA2 ACVR1 FZD5 SERPINE2 ACKR3 HOXA5 ADAMTS12 ISL1 IL6ST STAT3 FK…
0.0284783	17	71	2.19527	Positive regulation of cell cycle phase transition	http://amigo.geneontology.org/amigo/term/GO:1901989	SIN3A RCC2 VPS4B ANXA1 MTBP CRNN UBE2C CUL4A DTL CUL3 NPM1 MEPCE CDK4 TOPAZ1 AIF1 MECP2 DBF4B
0.0288357	21	96	2.0056	Regulation of cellular response to transforming growth factor beta stimulus	http://amigo.geneontology.org/amigo/term/GO:1903844	EP300 HSP90AB1 CITED2 CD109 SDCBP FERMT1 EMILIN1 SPRY2 SKIL FBN2 SNX25 ITGA3 ZEB2 SNW1 NRROS PBLD PMEPA1 FAM89B PIN1 CAV3 SNX6
0.0288393	25	122	1.87878	Clathrin-mediated endocytosis	https://reactome.org/download/current	PACSIN2 COPS7A IGF2R COPS2 FNBP1 COPS5 ACTB HIP1R ARPC3 ARPC4 REPS2 FZD4 CBL ARPC5 ACTR3 AGFG1 STAM2 GRB2 COPS3 UBQLN1 CLTC DVL2 VAMP7 HGS EPN2
0.0292092	23	109	1.93463	Response to UV	http://amigo.geneontology.org/amigo/term/GO:0009411	EP300 CDKN1A RUVBL2 UBE4B MAP3K4 INO80 TRIM32 ERCC4 MAP4K3 XPC RELA DDB1 MAP2K7 MMP1 USP28 DTL NPM1 MSH6 RPL26 TMEM161A EIF2S1 GPX1 UBE2B
0.0296916	57	351	1.4889	Regulation of cell projection organization	http://amigo.geneontology.org/amigo/term/GO:0031344	EP300 MAK SIPA1L1 ARHGAP35 DRAXIN PDPN RCC2 WASF2 TOX CRABP2 IFT140 SLIT2 SPRY2 STK24 SEMA4D CORO1C YWHAH VIM RYK NLGN1 HRG CDHR5 PRKCSH ICAM1 CDHR2 ARAP1 FZD4 ACTR3 TBR1 STK25 MYO10 SEPTIN9 CDC42EP4 GFAP NTN1 TAPT1 RHOA CARMIL2 CRMP1 IL20RB POU4F2 VPS35 CAMSAP2 YAP1 PTK6 FAM110C INS SNAPIN LRIG2 RAC1 SS18L1 CLN3 WAS RAB5A PALM RP1 RALA
0.0299554	26	129	1.84791	Fluid shear stress and atherosclerosis	http://www.genome.jp/kegg-bin/show_pathway?ssc05418	VEGFA HSP90AB1 HSP90AA1 NQO1 PIK3CD BMP4 TXN SDC2 ACTB IL1R1 CALML5 CTSL RELA MAP2K7 ICAM1 SQSTM1 ACVR1 SUMO2 MAP2K4 RHOA LOC100739508 RAC1 LOC100153094 AKT1 HMOX1 CAV3
0.0300408	20	90	2.03744	Vesicle-mediated transport to the plasma membrane	http://amigo.geneontology.org/amigo/term/GO:0098876	AKAP5 RAB14 ARFGEF2 ACTN2 VPS26A GRIP2 RAB7A STX3 CCDC93 ACSL3 RAB34 EHD4 NDRG4 VPS50 OPTN SNX17 VPS35 VPS35L RACK1 CLN3
0.0301167	6	13	4.2316	Regulation of protein localization to chromosome, telomeric region	http://amigo.geneontology.org/amigo/term/GO:1904814	TCP1 TERF1 CCT3 CCT7 CCT4 DKC1
0.0301167	6	13	4.2316	NADPH regeneration	http://amigo.geneontology.org/amigo/term/GO:0006740	PGD PGAM1 TALDO1 PGLS G6PD H6PD
0.0301167	6	13	4.2316	Retinoic acid receptor binding	http://amigo.geneontology.org/amigo/term/GO:0042974	RARG NR1H2 ARID5A CTBP2 NRIP1 SNW1
0.0301167	163	1196	1.24955	Locomotion	http://amigo.geneontology.org/amigo/term/GO:0040011	EP300 SUN2 ACVRL1 PTPRO GPLD1 SLC26A8 MMP14 RIN3 LGMN GAS8 CDH13 CFAP20 GPI ARHGAP35 PIK3CD DRAXIN PDPN RCC2 WASF2 CAP1 MAPRE2 DOCK7 SMOC2 CITED2 CCN2 ATP5F1A RNF165 TPM1 SEMA6D NDN CCBE1 BMP4 ANXA1 TRIM32 SULF1 TRIM55 SDCBP DDR2 IGSF9 LMNA RHOC CCN1 SYDE2 DNAI3 DLC1 FERMT1 DDRGK1 CASS4 ACTB IL1R1 SEMA4C ATOH8 PEX13 EMILIN1 DPYSL5 LRATD1 SLIT2 DACH1 SPRY2 STK24 SEMA4D CORO1C RASGEF1A PRKG1 LGI1 D…
0.0301167	6	13	4.2316	Establishment of protein localization to telomere	http://amigo.geneontology.org/amigo/term/GO:0070200	TCP1 TERF1 CCT3 CCT7 CCT4 DKC1
0.0301167	6	13	4.2316	Pentose-phosphate shunt	http://amigo.geneontology.org/amigo/term/GO:0006098	PGD PGAM1 TALDO1 PGLS G6PD H6PD
0.0302777	13	48	2.48313	Metalloexopeptidase activity	http://amigo.geneontology.org/amigo/term/GO:0008235	MMP14 CNDP2 CPA6 CPXM1 NPEPL1 AGBL5 XPNPEP2 ERAP1 CPA5 CPD LAP3 METAP2 CPZ
0.0302777	11	37	2.72576	RNA stabilization	http://amigo.geneontology.org/amigo/term/GO:0043489	HNRNPU DKC1 ELAVL1 ANGEL2 AXIN2 MEIOC TIRAP TARDBP IGF2BP1 YBX1 THRAP3
0.0308886	19	84	2.07382	Cellular response to leukemia inhibitory factor	http://amigo.geneontology.org/amigo/term/GO:1990830	RARG JARID2 SRSF3 CTH SRSF7 SPRY2 INA CTBP2 HNRNPU SLC25A5 MCF2 ICAM1 FZD4 CACYBP MAT2A NUP35 EEF1E1 GCLM ABCD4
0.0316024	50	300	1.52808	Cellular response to hormone stimulus	http://amigo.geneontology.org/amigo/term/GO:0032870	EP300 DDX17 GPLD1 PARK7 LEPROT BMP4 JAK2 ANXA1 CA2 RXRG DDRGK1 NCOA5 ARID5A SLIT2 USO1 NCOR2 YWHAH ACTN2 HNRNPU PIP4K2A UBA5 OGT RELA SMARCA4 CALR AKAP8 CRHBP BRD8 CAMK2A TFPI GRB2 STAT3 PHB ACACA WBP2 RHOA NUCKS1 CTSB LANCL2 CDK4 IL20RB URI1 POU4F2 PTPN11 YAP1 DDX5 INS GDF15 PID1 KANK2
0.0316505	8	22	3.33399	Protein folding chaperone	http://amigo.geneontology.org/amigo/term/GO:0044183	HSP90AB1 TCP1 PFDN2 CCT3 CCT7 CCT4 PDCL3 PFDN1
0.0316505	8	22	3.33399	Cytoplasmic pattern recognition receptor signaling pathway in response to virus	http://amigo.geneontology.org/amigo/term/GO:0039528	USP15 TRIM15 LSM14A PUM2 UFD1 TKFC PHB C1QBP
0.0316505	8	22	3.33399	Cellular response to interleukin-6	http://amigo.geneontology.org/amigo/term/GO:0071354	RIPK1 CEBPA RELA IL6ST STAT3 PHB YAP1 PID1
0.0316505	8	22	3.33399	Regulation of cellular response to vascular endothelial growth factor stimulus	http://amigo.geneontology.org/amigo/term/GO:1902547	SMOC2 CCBE1 SPRY2 JCAD HRG ADGRA2 ADAMTS12 DLL1
0.031697	60	375	1.46695	Positive regulation of locomotion	http://amigo.geneontology.org/amigo/term/GO:0040017	SUN2 GPLD1 MMP14 LGMN CDH13 CFAP20 GPI PIK3CD PDPN MAPRE2 DOCK7 SMOC2 ATP5F1A SEMA6D CCBE1 BMP4 ANXA1 TRIM32 SDCBP DDR2 RHOC CCN1 FERMT1 DDRGK1 CASS4 IL1R1 ATOH8 SLIT2 SPRY2 SEMA4D JCAD ELP6 MYLK SRPX2 STX3 SWAP70 ICAM1 CALR LAMB1 MGAT5 ADGRA2 ACVR1 STAT3 DAPK2 RHOA CARMIL2 PDGFRB SERPINE1 RACK1 XBP1 GLIPR2 FAM110C AIF1 SASH1 BAG4 C1QBP RAC1 FAM89B CEMIP HMOX1
0.0323486	17	72	2.16478	PPAR signaling pathway	http://www.genome.jp/kegg-bin/show_pathway?ssc03320	ACSBG1 ACADM RXRG FABP1 SORBS1 CPT1A PLIN5 ACSBG2 SLC27A6 MMP1 ACSL3 ACOX1 ILK CPT1C PODN PLIN2 FABP3
0.0325602	126	896	1.28931	Endoplasmic reticulum	http://amigo.geneontology.org/amigo/term/GO:0005783	CKAP4 ITPR3 PKHD1 ACSBG1 RCN2 ARHGAP5 ANGEL1 AMFR YIF1B RPL22 PARK7 ANKRD13C TXNDC12 RPS8 PNLDC1 RPL4 RPS6 SULF1 ATF6 CASQ1 CRABP2 CERS2 ABCA4 LRRC8C PLCB4 SPTLC3 SEC23B DDRGK1 VAPB COL26A1 PKD1 SPAST PDIA6 MTTP CLU ERP29 SPPL3 EMID1 UFD1 RYR2 P4HA1 PKD2L1 RPN1 UBA5 RPL24 ASB11 UBA1 RNF128 EEF1G ELAVL1 MARCHF2 PRKCSH CALR USE1 TMED9 UTP15 RASGRF2 ERAP1 RPS3 ALG8 RNF26 SRPRA MR1 LPGAT1 GORASP2 DNA…
0.0325602	9	27	3.05615	Pyruvate metabolism and Citric Acid (TCA) cycle	https://reactome.org/download/current	GSTZ1 PDP1 HAGH LDHA VDAC1 DLAT DLD PDHB CS
0.0325602	9	27	3.05615	Striated Muscle Contraction	https://reactome.org/download/current	MYBPC1 TMOD2 TPM2 TMOD4 ACTN2 VIM TPM4 TNNI2 MYL2
0.0325602	9	27	3.05615	Regulation of smooth muscle cell migration	http://amigo.geneontology.org/amigo/term/GO:0014910	DOCK7 TPM1 SEMA6D SLIT2 PRKG1 NDRG4 PDGFRB SERPINE1 AIF1
0.0325602	134	961	1.27843	Cell migration	http://amigo.geneontology.org/amigo/term/GO:0016477	SUN2 ACVRL1 PTPRO GPLD1 MMP14 RIN3 LGMN CDH13 GPI ARHGAP35 PIK3CD PDPN RCC2 WASF2 CAP1 MAPRE2 DOCK7 SMOC2 CITED2 CCN2 ATP5F1A TPM1 SEMA6D NDN CCBE1 BMP4 ANXA1 TRIM32 SULF1 TRIM55 SDCBP DDR2 LMNA RHOC CCN1 SYDE2 DNAI3 DLC1 FERMT1 DDRGK1 CASS4 IL1R1 SEMA4C ATOH8 PEX13 EMILIN1 SLIT2 DACH1 SPRY2 STK24 SEMA4D CORO1C RASGEF1A PRKG1 JCAD ELP6 HRG MYLK SRPX2 LRP5 PRR5L SWAP70 VAV1 ICAM1 CALR PKN1 SLC12A2…
0.0325602	26	130	1.83369	Protein import	http://amigo.geneontology.org/amigo/term/GO:0017038	CDKN1A IPO4 HSP90AA1 PDCD5 BMP4 PEX2 LMNA FERMT1 PEX13 CLU RAN BAG3 CHCHD4 HCLS1 AIFM1 POLA2 TIMM44 ELAVL1 TPR STAT3 ARHGEF5 TARDBP KPNA3 FLNA ING1 TRIM28
0.0325602	33	178	1.69977	Regulation of microtubule-based process	http://amigo.geneontology.org/amigo/term/GO:0032886	MDM1 BICD1 PKHD1 CFAP20 ATF5 VPS4B PKD1 GEN1 SLAIN2 LAMP1 DRG1 HNRNPU ARMC4 RPS3 CHORDC1 CEP295 AKAP9 TPR MCPH1 NPM1 TAOK1 RHOA PHLDB2 CLTC CHMP1A TRIM37 TRAF3IP1 STMN1 CAMSAP2 MAPRE3 MECP2 RAC1 RBM4
0.0333513	20	91	2.01505	Telomere organization	http://amigo.geneontology.org/amigo/term/GO:0032200	XRCC6 HSP90AB1 HSP90AA1 RPA2 MAP3K4 TCP1 RAD51 TERF1 CCT3 DCLRE1B ERCC4 CCT7 CCT4 DNA2 HNRNPU DKC1 MAP2K7 H3F3B ATM SMG1
0.033469	52	316	1.50873	GTPase regulator activity	http://amigo.geneontology.org/amigo/term/GO:0030695	ARHGAP9 PLEKHG6 SIPA1L1 CCDC88C RIN3 ARHGEF1 ARHGAP35 DOCK7 RGS4 DENND2C DLC1 ARFGEF2 SLIT2 ELMOD2 DIS3 ARHGEF7 RASGEF1A EIF2B5 ARHGAP6 ARHGEF9 MCF2 MADD ARFGAP2 DENND1C VAV1 RGS14 RASGRF2 FNIP1 LAMTOR1 ARAP1 ELMOD1 ALS2 AGFG1 HTR2B NGEF CYTH1 ARHGEF5 ARHGEF16 SH3BP5 ARHGAP31 RALGAPA2 FARP1 ARHGEF28 RASGEF1B ARHGEF6 CHML RALGAPA1 RGS1 RAP1GAP2 TBC1D20 GPSM1 RGS8
0.033469	52	316	1.50873	Nucleoside-triphosphatase regulator activity	http://amigo.geneontology.org/amigo/term/GO:0060589	ARHGAP9 PLEKHG6 SIPA1L1 CCDC88C RIN3 ARHGEF1 ARHGAP35 DOCK7 RGS4 DENND2C DLC1 ARFGEF2 SLIT2 ELMOD2 DIS3 ARHGEF7 RASGEF1A EIF2B5 ARHGAP6 ARHGEF9 MCF2 MADD ARFGAP2 DENND1C VAV1 RGS14 RASGRF2 FNIP1 LAMTOR1 ARAP1 ELMOD1 ALS2 AGFG1 HTR2B NGEF CYTH1 ARHGEF5 ARHGEF16 SH3BP5 ARHGAP31 RALGAPA2 FARP1 ARHGEF28 RASGEF1B ARHGEF6 CHML RALGAPA1 RGS1 RAP1GAP2 TBC1D20 GPSM1 RGS8
0.0343571	59	369	1.46596	Positive regulation of cellular component movement	http://amigo.geneontology.org/amigo/term/GO:0051272	SUN2 GPLD1 MMP14 LGMN CDH13 CFAP20 GPI PIK3CD PDPN MAPRE2 DOCK7 SMOC2 ATP5F1A SEMA6D CCBE1 BMP4 ANXA1 TRIM32 SDCBP DDR2 RHOC CCN1 FERMT1 DDRGK1 CASS4 IL1R1 ATOH8 SPRY2 SEMA4D JCAD ELP6 MYLK SRPX2 SWAP70 ICAM1 CALR LAMB1 MGAT5 ADGRA2 ACVR1 STAT3 DAPK2 RHOA CARMIL2 PDGFRB SERPINE1 STMN1 RACK1 XBP1 GLIPR2 FAM110C AIF1 SASH1 BAG4 C1QBP RAC1 FAM89B CEMIP HMOX1
0.0343571	78	515	1.38862	Regulation of transferase activity	http://amigo.geneontology.org/amigo/term/GO:0051338	XRCC6 PTPRO CDKN1A HSP90AB1 ARRDC4 HSP90AA1 PARK7 CDC20 MAP3K4 TCP1 BMP4 TERF1 DDR2 CCN1 RBL1 CASS4 PKD1 CCT4 SPDYA SPRY2 CLU CORO1C DKK1 PRDX3 BCCIP HNRNPU PIP4K2A PRKAR2A WWTR1 CCNB3 CCNQ DKC1 LRP5 DGKZ MAP2K7 CDC37 PKN1 RGS14 RPS3 FZD4 CHORDC1 UBASH3B MCPH1 NRG1 GCG ALS2 FZD5 HTR2B NPM1 CHMP6 SLC9A3R1 ORMDL3 PHB MMD GGNBP2 UNC119 RHOA TIRAP ARHGEF5 PDGFRB UCHL1 PIBF1 DVL2 NVL CEP85 CD200 MAPRE…
0.0345356	29	151	1.76083	Nucleotide biosynthetic process	http://amigo.geneontology.org/amigo/term/GO:0009165	ATP5F1B ACOT7 CTPS1 ATP5F1A EEF1D ACSS1 PANK2 PAICS ADK QRICH1 ATP6V1A GUK1 ATP5MC1 NME2 AMPD3 ATP5ME PDHB PPCDC AK2 ATP5PD ALDOA ATP5MF ATP5F1C HPRT1 PID1 ATP5F1D ATP5PB STOML2 TYMS
0.0346431	19	85	2.04942	Response to leukemia inhibitory factor	http://amigo.geneontology.org/amigo/term/GO:1990823	RARG JARID2 SRSF3 CTH SRSF7 SPRY2 INA CTBP2 HNRNPU SLC25A5 MCF2 ICAM1 FZD4 CACYBP MAT2A NUP35 EEF1E1 GCLM ABCD4
0.0346493	25	124	1.84848	Regulation of cell projection assembly	http://amigo.geneontology.org/amigo/term/GO:0060491	MAK ARHGAP35 RCC2 WASF2 IFT140 SLIT2 CORO1C HRG ICAM1 ARAP1 ACTR3 MYO10 SEPTIN9 CDC42EP4 TAPT1 CARMIL2 YAP1 FAM110C RAC1 CLN3 WAS RAB5A PALM RP1 RALA
0.0347763	96	657	1.33968	Positive regulation of catalytic activity	http://amigo.geneontology.org/amigo/term/GO:0043085	XRCC6 CDKN1A HSP90AB1 ARRDC4 AKAP5 AHSA1 LGMN HSP90AA1 PDCD5 NR1H2 PARK7 RCC2 GRHL3 MAPRE2 DOCK7 CDC20 MAP3K4 TCP1 DDR2 RHOC CCN1 DLC1 DDRGK1 YWHAB CASS4 PKD1 ANTXR1 CCT4 SPDYA ELMOD2 ARHGEF7 SEMA4D CLU HIP1R DIABLO CORO1C PSAP DKK1 ABHD5 ARHGAP6 AIFM1 DKC1 DGKZ VAV1 MAP2K7 RGS14 ARAP1 RPS3 FZD4 ELMOD1 AVPR1B NRG1 GCG DNAJC10 ALS2 FZD5 HTR2B SSBP1 NPM1 STAT3 PHB MMD UNC119 MSH6 RHOA CHTOP TIRAP A…
0.034837	68	438	1.42341	Supramolecular polymer	http://amigo.geneontology.org/amigo/term/GO:0099081	TUBA1A KRT84 MYO1A BICD1 DEK TUBB CFL2 GAS8 NUDC TCP1 PGM5 ANXA1 TRIM32 CSPP1 CCT3 LMNA TMOD4 COL11A1 POLB TNNC2 CCT7 CCT4 LRPPRC SLAIN2 FHDC1 HSPH1 SPRY2 MYO18B RYR2 ACTN2 ACTA2 INA BAG3 HNRNPU KIF5B VIM NEBL FXR1 LMNB1 FBN2 CEP295 VPS11 CUL3 COL4A4 LMOD2 SEPTIN9 GFAP SYNC CLTC EIF6 CLMP MTUS2 CAMSAP2 KRT79 MAPRE3 PALLD AIF1 TNNI2 RAC1 MYOM3 CRYAB WAS KRT7 PLEC MYL2 MFAP1 TPT1 TNNI3
0.0348622	45	265	1.55691	RHO GTPase Effectors	https://reactome.org/download/current	TUBA1A NUP107 CENPT RCC2 NUDC WASF2 CDC20 YWHAZ RHOC YWHAB ACTB ARPC1B YWHAQ CLIP1 ARPC3 DYNLL1 YWHAH KIF5B ARPC4 PAK2 KLC2 PPP2R5B PKN1 ARPC5 CENPF ACTR3 FMNL2 BAIAP2 GRB2 TAOK1 ERCC6L RHOA H3F3B PPP2R1A DVL2 IL20RB ZWINT FLNA SPC24 NOXA1 RAC1 WAS PPP1R14A PIN1 NDE1
0.0349126	4	6	6.11231	Retinoid X receptor binding	http://amigo.geneontology.org/amigo/term/GO:0046965	RARG NR1H2 ARID5A NRIP1
0.0349126	4	6	6.11231	DOID:9007823 Chromosome Xq26.3 Duplication Syndrome	ftp://ftp.rgd.mcw.edu/pub/data_release	RBMX HTATSF1 VGLL1 ARHGEF6
0.0349686	32	172	1.70576	Endosome membrane	http://amigo.geneontology.org/amigo/term/GO:0010008	PACSIN2 MON2 SCAMP2 RCC2 IGF2R SNX3 VPS4B SNX21 LAPTM4A CORO1C VPS26A RAB7A DOP1B UBA1 LAMTOR1 MR1 CHMP6 EHD4 CHMP1A SNX17 VPS35 RMC1 VPS37B SLC11A2 PMEPA1 RAC1 VPS36 CLN3 SLC48A1 MVB12B RAB5A SNX6
0.0349686	34	186	1.67596	L13a-mediated translational silencing of Ceruloplasmin expression	https://reactome.org/download/current	RPS18 EIF3K RPS11 EIF3I RPS8 EIF3J RPS6 EIF3E RPL30 RPS3A RPLP2 EIF3M RPS28 RPL19 RPS21 RPS27L RPL13 EIF4H RPS17 RPL29 RPL26 RPS7 RPL7 RPS15 RPS2 RPL35 RPL17 RPL23A RPS15A RPL32 RPS25 RPL23 RPL28 RPS24
0.0349686	33	179	1.69028	Positive regulation of DNA-binding transcription factor activity	http://amigo.geneontology.org/amigo/term/GO:0051091	EP300 RIPK1 TRIM26 TRIM15 PARK7 CTH CAPN3 TRIM32 COPS5 DDR2 CRNN DDRGK1 CLU SMARCB1 PRDX3 HCLS1 LRP5 RELA SMARCA4 CAMK2A RPS3 FZD4 NPM1 TIRAP ARHGEF5 FLOT1 TRIM37 DVL2 CD200 TRIM14 INS ATF2 DDIT3
0.0350989	56	347	1.47964	DOID:9005643 Diabetes Mellitus Experimental	ftp://ftp.rgd.mcw.edu/pub/data_release	EP300 CDKN1A VEGFA MFGE8 POLG ARG2 HSPG2 NT5E HDAC2 TJP1 TNC CRH CASQ1 HCN3 ERCC4 ABCG8 LTBP1 CLU YWHAH RYR2 MTR ADK PRKG1 IDE ENTPD1 KIF5B CD86 OGT AIFM1 TIMM44 SMARCA4 GUK1 VDAC1 CTSC ANGPT2 GSR GCG ACSL3 CALD1 ACOX1 ABCC3 ITGA3 SERPINF1 GIPR PDGFRB CTSB G6PD CYP11A1 HMGCL TWNK H6PD HPRT1 BCL2L1 HNRNPA2B1 AKT1 LRP2
0.0350989	23	111	1.89977	Histone methylation	http://amigo.geneontology.org/amigo/term/GO:0016571	JARID2 PHF1 LMNA DPY30 SMARCB1 SUV39H2 WDR82 PAXBP1 OGT TRMT112 DOT1L CARM1 DNMT1 GCG KMT2C CHTOP SNW1 CTCF WDR5 KDM4A FBL MECP2 IWS1
0.0350989	52	317	1.50397	Regulation of vesicle-mediated transport	http://amigo.geneontology.org/amigo/term/GO:0060627	PACSIN2 BICD1 C2 MFGE8 CPLX3 AKAP5 RIN3 CDH13 AP1G1 NR1H2 SNX3 VPS4B ANXA1 SDCBP CD84 TFR2 STX1A LAMP1 CLU HIP1R ANKRD13A ACTN2 DKK1 BSN RAB7A NLGN1 IL1RAPL1 GPC3 C3 CALR RUFY1 CBL ACSL3 NDRG4 FLOT1 HNRNPK TGM2 SERPINE1 DLL1 VAMP7 RACK1 ATP13A2 MAGI2 RIMS2 HGS SNAPIN TBC1D20 CLN3 PPT1 RAB5A STXBP5L RALA
0.0351701	13	49	2.43245	Valine, leucine and isoleucine degradation	http://www.genome.jp/kegg-bin/show_pathway?ssc00280	IL4I1 ACADM IVD HADH AUH ACADS HSD17B10 DLD OXCT1 MCCC2 ALDH3A2 HMGCL BCAT1
0.0351701	26	131	1.81969	Protein-containing complex localization	http://amigo.geneontology.org/amigo/term/GO:0031503	NUP107 SRSF3 RCC2 KIF17 IFT140 RAN LGI1 HNRNPU RBM15B GRIP2 NLGN1 THOC2 STX3 DDX39A AKAP8L TPR NPM1 CHTOP VPS35 LOC110257686 IFT46 SNAPIN IWS1 SFPQ HNRNPA2B1 WDR60
0.036031	27	138	1.79383	Protein methylation	http://amigo.geneontology.org/amigo/term/GO:0006479	JARID2 PHF1 RPL22 LMNA CAMKMT DPY30 SMARCB1 SUV39H2 WDR82 PAXBP1 OGT TRMT112 PRMT3 DOT1L CARM1 DNMT1 ETF1 GCG KMT2C CHTOP SNW1 CTCF WDR5 KDM4A FBL MECP2 IWS1
0.036031	27	138	1.79383	Protein alkylation	http://amigo.geneontology.org/amigo/term/GO:0008213	JARID2 PHF1 RPL22 LMNA CAMKMT DPY30 SMARCB1 SUV39H2 WDR82 PAXBP1 OGT TRMT112 PRMT3 DOT1L CARM1 DNMT1 ETF1 GCG KMT2C CHTOP SNW1 CTCF WDR5 KDM4A FBL MECP2 IWS1
0.0360823	17	73	2.13512	Protein acetyltransferase complex	http://amigo.geneontology.org/amigo/term/GO:0031248	EP300 RUVBL2 ACTB NAA15 NAA35 TADA3 NAA50 OGT NAA10 BRD8 ING3 TAF4 WDR5 TAF9B EP400 TAF6 ATF2
0.0360823	17	73	2.13512	Acetyltransferase complex	http://amigo.geneontology.org/amigo/term/GO:1902493	EP300 RUVBL2 ACTB NAA15 NAA35 TADA3 NAA50 OGT NAA10 BRD8 ING3 TAF4 WDR5 TAF9B EP400 TAF6 ATF2
0.0360823	11	38	2.65403	DNA Damage Recognition in GG-NER	https://reactome.org/download/current	COPS7A COPS2 INO80 COPS5 ACTB CUL4A ACTR8 XPC DDB1 COPS3 RBX1
0.0360823	17	73	2.13512	Cellular response to topologically incorrect protein	http://amigo.geneontology.org/amigo/term/GO:0035967	EP300 AMFR COPS5 ATF6 DDRGK1 VAPB UFD1 BAG3 CUL3 OPTN IL20RB KLHL15 XBP1 WFS1 EIF2S1 HERPUD1 DDIT3
0.0362464	14	55	2.33379	Antioxidant activity	http://amigo.geneontology.org/amigo/term/GO:0016209	TXNRD1 TXNRD2 PRXL2A PRDX3 PRDX5 PRDX2 GSR PRDX6 SRXN1 NXN LOC100627466 GPX1 TXNDC17 SOD2
0.036335	15	61	2.25454	Brush border	http://amigo.geneontology.org/amigo/term/GO:0005903	MYO1A SLC28A1 MYO1E MFSD10 ABCG2 CDHR5 CDHR2 ACTR3 SLC9A3R1 SLC2A2 CAPZA2 SLC11A2 CLTRN PLEC LRP2
0.036335	15	61	2.25454	Proton-transporting two-sector ATPase complex	http://amigo.geneontology.org/amigo/term/GO:0016469	ATP5F1B ATP5F1A ATP6V0C ATP6V1C2 ATP6V1A ATP5MC1 ATP5ME ATP5MD ATP5PD TMEM268 ATP6V1D ATP5MF ATP5F1C ATP5F1D ATP5PB
0.036335	16	67	2.18948	Nuclear periphery	http://amigo.geneontology.org/amigo/term/GO:0034399	NUP107 ANP32A LMNA NCOR2 HNRNPU STAG1 AKAP8 AKAP8L LMNB1 TPR CENPF EIF6 SNW1 CHMP1A PHF5A SFPQ
0.036335	50	303	1.51295	Nucleotide metabolic process	http://amigo.geneontology.org/amigo/term/GO:0009117	EP300 ATP5F1B GPI ACOT7 PARK7 CTPS1 NT5E ATP5F1A DPYS DPYD EEF1D ACSS1 PANK2 PAICS RAN HK1 ADK PGAM1 OXSM QRICH1 ATP6V1A OGT GUK1 GALK1 STAT3 ATP5MC1 NME2 ACACA PIPOX CDA AMPD3 EIF6 ATP5ME SLC2A6 PDHB GMPR PPCDC AK2 ATP5PD ALDOA INS ATP5MF ATP5F1C HPRT1 PID1 ATP5F1D MCEE ATP5PB STOML2 TYMS
0.036335	16	67	2.18948	Purine nucleoside triphosphate metabolic process	http://amigo.geneontology.org/amigo/term/GO:0009144	ATP5F1B ATP5F1A RAN ADK ATP6V1A ATP5MC1 NME2 ATP5ME ATP5PD ALDOA ATP5MF ATP5F1C PID1 ATP5F1D ATP5PB STOML2
0.036335	37	208	1.63093	Negative regulation of catabolic process	http://amigo.geneontology.org/amigo/term/GO:0009895	HSP90AB1 DHX34 PARK7 SNX3 SDCBP DDRGK1 LRPPRC HNRNPU OGT DKC1 RELA EIF4G2 SGTA ELAVL1 MDM4 ANGEL2 SERPINE2 HTR2B AXIN2 MEIOC STAT3 PHB PHF23 TIRAP TARDBP IGF2BP1 KDM4A SECISBP2 YBX1 THRAP3 FLNA INS PDCL3 PSME3IP1 LRIG2 PIN1 HMOX1
0.036335	50	303	1.51295	Endomembrane system organization	http://amigo.geneontology.org/amigo/term/GO:0010256	PACSIN2 SUN2 ESYT1 ACRBP PARP11 CPLX3 VRK1 SPACA1 SNX3 VPS4B YWHAZ SPATA46 CASQ1 SPTA1 LMNA SYPL2 ARFGEF2 VAPB GCC2 SPAST USO1 FHDC1 CLU CORO1C ARMH3 SGTA AKAP8L SQSTM1 TMED9 LAMTOR1 RNF26 AKAP9 TRAPPC11 ALS2 SERPINE2 STK25 SPAM1 BNIP1 BAIAP2 SLC9A3R1 FLOT1 TARDBP OPTN EMC7 CAMSAP2 SNAPIN TBC1D20 CLN3 RBSN CAV3
0.036335	15	61	2.25454	PW:0000018 Parkinson's disease pathway	ftp://ftp.rgd.mcw.edu/pub/data_release	SAMD8 NDUFB6 UBA1 SLC25A5 VDAC1 NDUFA2 NDUFS6 ATP5MC1 VPS35 ATP13A2 NDUFB4 ATP5F1C ATP5F1D ATP5PB NDUFA5
0.036335	144	1047	1.26099	Regulation of cell population proliferation	http://amigo.geneontology.org/amigo/term/GO:0042127	XRCC6 ACVRL1 RARG JARID2 GPLD1 CDKN1A RUNX2 PKHD1 TGM1 ARG2 LGMN CDH13 E2F4 PDCD5 CEBPA IL4I1 ATF5 PIK3CD GAREM1 HDAC2 CD109 ATP5F1A TPM1 NDN SERPINB5 BMP4 RPS6 ANXA1 TNC TRIM32 EGFL7 MTBP PEX2 SULF1 TOX SDCBP DDR2 SPTA1 LMNA CRNN CCN1 DLC1 FERMT1 DDRGK1 ATOH8 FANCL SPDYA DACH1 SPRY2 TNFSF13B CUL4A CLU MN1 SMARCB1 PRKG1 PRDX3 HNRNPU JCAD WWTR1 HRG HCLS1 PAXBP1 SLC25A5 GPC3 LRP5 RELA STX3 DOT1L DN…
0.036584	22	105	1.92101	Inner mitochondrial membrane protein complex	http://amigo.geneontology.org/amigo/term/GO:0098800	ATP5F1A UQCRC2 NDUFB6 TIMM29 NDUFA2 AGK CHCHD3 NDUFS6 PHB NDUFV3 ATP5ME COX5A IMMT LOC100624067 NDUFB4 NDUFS3 ATP5MD ATP5PD ATP5F1C ATP5F1D ATP5PB NDUFA5
0.0366267	41	237	1.58611	Spindle	http://amigo.geneontology.org/amigo/term/GO:0005819	MAK PKHD1 CEP128 LSM14A RCC2 NUDC EPB41 MTCL1 VPS4B DLGAP5 CSPP1 POLB AGBL5 DYNLL1 BCCIP HNRNPU POC1A TADA3 STAG1 YEATS2 SLC25A5 RGS14 RPS3 CEP295 TPR CENPF CUL3 NPM1 CBX1 UNC119 CDC16 CLTC ATM CEP85 SHCBP1L CEP95 MAPRE3 PYCR3 WDR60 NDE1 TPT1
0.0367807	67	432	1.42196	Cellular component morphogenesis	http://amigo.geneontology.org/amigo/term/GO:0032989	PACSIN2 PTPRO ACRBP HSP90AB1 SIN3A CFL2 SIPA1L1 ARHGAP35 DRAXIN PDPN WASF2 DOCK7 RIMS1 SPACA1 RNF165 TPM1 CAPN3 NDN CASQ1 IGSF9 CRABP2 PANK2 DPYSL5 SLIT2 SEMA4D CORO1C YWHAH ACTN2 LGI1 NEBL RYK NLGN1 RPL24 SLITRK2 FZD4 TBR1 ALS2 NYAP2 STK25 SSBP1 LMOD2 DBNL ISL1 ITGB4 NTN1 PHLDB2 FLOT1 CRMP1 UCHL1 POU4F2 STMN1 BSG PTPN11 RIMS2 FOXG1 SLC11A2 TBCE HPRT1 PID1 BCL2L1 SS18L1 TBC1D20 VASP WDR1 C5H12orf…
0.036893	34	187	1.66699	Metabolism of amino acids and derivatives	https://reactome.org/download/current	ARG2 DLST GSTZ1 NQO1 GPT2 IL4I1 AGMAT AMD1 IVD MTAP CARNMT1 RIDA PHGDH PSPH TDO2 AUH MTR HSD17B10 CARNS1 DLAT ASNS DLD AASS MCCC2 PIPOX TPH2 PDHB BCAT1 PYCR3 LOC110256626 QDPR SDS TMLHE GCSH
0.0369132	7	18	3.56551	Glucose 6-phosphate metabolic process	http://amigo.geneontology.org/amigo/term/GO:0051156	GPI PGD PGAM1 TALDO1 PGLS G6PD H6PD
0.0370901	40	230	1.59452	Purine ribonucleotide metabolic process	http://amigo.geneontology.org/amigo/term/GO:0009150	EP300 ATP5F1B GPI ACOT7 NT5E ATP5F1A ACSS1 PANK2 PAICS RAN HK1 PGAM1 OXSM ATP6V1A OGT GALK1 STAT3 ATP5MC1 NME2 ACACA PIPOX AMPD3 EIF6 ATP5ME SLC2A6 PDHB GMPR PPCDC AK2 ATP5PD ALDOA INS ATP5MF ATP5F1C HPRT1 PID1 ATP5F1D MCEE ATP5PB STOML2
0.0370901	49	296	1.51775	NcRNA metabolic process	http://amigo.geneontology.org/amigo/term/GO:0034660	DDX17 POP4 TSEN34 INTS11 PARS2 RARS2 MTO1 RPS6 RCL1 EXOSC3 TRMT9B ESF1 POP7 DIS3 ZCCHC8 PES1 ELP6 DALRD3 QTRT2 HSD17B10 DKC1 RELA TRMT112 KHSRP RPS28 FARSA UTP15 NARS2 PUS3 SND1 STAT3 RRP1B MEPCE ELAC1 THUMPD1 RPL27 NVL YTHDF2 RPL26 KCNMB3 NOL9 FBL CLP1 RPL7 TRMT61A RPS25 AARSD1 FARS2 ERN2
0.0378181	19	86	2.02559	Respiratory electron transport ATP synthesis by chemiosmotic coupling and heat production by uncoupling proteins.	https://reactome.org/download/current	ATP5F1B SLC25A27 ETFB ECSIT NDUFA2 NDUFS6 ATP5MC1 NDUFV3 ATP5ME NDUFS7 COQ10A DMAC2L NDUFB4 NDUFS3 ATP5PD ATP5F1C ATP5F1D ATP5PB NDUFA5
0.0381204	58	364	1.46091	Positive regulation of cell motility	http://amigo.geneontology.org/amigo/term/GO:2000147	SUN2 GPLD1 MMP14 LGMN CDH13 CFAP20 GPI PIK3CD PDPN MAPRE2 DOCK7 SMOC2 ATP5F1A SEMA6D CCBE1 BMP4 ANXA1 TRIM32 SDCBP DDR2 RHOC CCN1 FERMT1 DDRGK1 CASS4 IL1R1 ATOH8 SPRY2 SEMA4D JCAD ELP6 MYLK SRPX2 SWAP70 ICAM1 CALR LAMB1 MGAT5 ADGRA2 ACVR1 STAT3 DAPK2 RHOA CARMIL2 PDGFRB SERPINE1 RACK1 XBP1 GLIPR2 FAM110C AIF1 SASH1 BAG4 C1QBP RAC1 FAM89B CEMIP HMOX1
0.0383055	10	33	2.77832	Lysosome Vesicle Biogenesis	https://reactome.org/download/current	AP4S1 AP1G1 CLVS2 AP4E1 CLTC GNS VAMP7 HGS TXNDC5 AP1S2
0.0385389	67	433	1.41868	Supramolecular fiber	http://amigo.geneontology.org/amigo/term/GO:0099512	TUBA1A KRT84 MYO1A BICD1 DEK TUBB CFL2 GAS8 NUDC TCP1 PGM5 ANXA1 TRIM32 CSPP1 CCT3 LMNA TMOD4 COL11A1 POLB TNNC2 CCT7 CCT4 LRPPRC SLAIN2 FHDC1 HSPH1 SPRY2 MYO18B RYR2 ACTN2 ACTA2 INA BAG3 HNRNPU KIF5B VIM NEBL FXR1 LMNB1 FBN2 CEP295 VPS11 CUL3 LMOD2 SEPTIN9 GFAP SYNC CLTC EIF6 CLMP MTUS2 CAMSAP2 KRT79 MAPRE3 PALLD AIF1 TNNI2 RAC1 MYOM3 CRYAB WAS KRT7 PLEC MYL2 MFAP1 TPT1 TNNI3
0.0387055	12	44	2.50049	Promoter-specific chromatin binding	http://amigo.geneontology.org/amigo/term/GO:1990841	NRL E2F4 NDN GTF2B RBL1 ERCC4 HNRNPU DNMT1 ISL1 POU4F2 MECP2 TRIM28
0.0387055	12	44	2.50049	Organelle transport along microtubule	http://amigo.geneontology.org/amigo/term/GO:0072384	SUN2 BICD1 SPAST LAMP1 AP3M1 BLOC1S2 KIF5B UCHL1 SNAPIN CLN3 BLOC1S6 NDE1
0.0390808	28	146	1.75834	Protein acetylation	http://amigo.geneontology.org/amigo/term/GO:0006473	EP300 SIN3A MBIP RUVBL2 PARK7 GTF2B NAA15 SMARCB1 NAA35 TADA3 YEATS2 NAA50 OGT LOC100525798 NAA10 BRD8 CEP295 ING3 ISL1 TAOK1 WBP2 CTCF WDR5 EP400 DR1 MECP2 IWS1 ATF2
0.0390808	28	146	1.75834	Non-alcoholic fatty liver disease	http://www.genome.jp/kegg-bin/show_pathway?ssc04932	CEBPA COX6B DHDH PIK3CD UQCRC2 COX5B LOC100516606 FAS NDUFB6 UQCRC1 RELA NDUFA2 NDUFS6 SDHA NDUFV3 NDUFS7 COX5A LOC100624067 XBP1 NDUFB4 CYC1 NDUFS3 EIF2S1 INS RAC1 NDUFA5 AKT1 DDIT3
0.0390808	72	472	1.39858	Proteolysis involved in cellular protein catabolic process	http://amigo.geneontology.org/amigo/term/GO:0051603	USP15 HSP90AB1 LGMN FBXO9 FBXO31 AMFR PARK7 UBE4B OMA1 CDC20 VPS4B CLPX PSMC6 TRIM32 SDCBP DDRGK1 UBE2C PKD1 UBA6 USP12 CUL4A CLU UFD1 IDE ATE1 WWTR1 OGT DDB1 SGTA USP28 CBL PSMC2 KLHL20 EDEM3 DTL DNAJC10 CUL3 ADAMTS12 RNF180 SUMO2 PSME3 SPOP UBQLN1 RNF216 UCHL1 CTSB ATP5IF1 PSMB1 KLHL15 RLIM CUL5 RACK1 LTN1 WFS1 USP42 ANAPC2 UBE2K GPX1 PDCL3 RBX1 PSME3IP1 ANAPC11 OS9 PCNP SIAH1 RNF115 CLPP SEC61…
0.0390808	36	202	1.63398	Regulation of response to biotic stimulus	http://amigo.geneontology.org/amigo/term/GO:0002831	XRCC6 USP15 TRIM15 HSP90AB1 SIN3A ARG2 HSP90AA1 AP1G1 LSM14A IL4I1 PUM2 ELMOD2 LAMP1 PSPC1 UFD1 HRG IRF7 TKFC VAV1 CDC37 PRDX2 RNF26 MR1 RNF216 OPTN TRAF3IP1 YTHDF2 ZMPSTE24 CADM1 SASH1 UBE2K INS C1QBP SFPQ RBM4 NLRC5
0.0391518	55	342	1.47446	Cell surface receptor signaling pathway involved in cell-cell signaling	http://amigo.geneontology.org/amigo/term/GO:1905114	PTPRO DAAM2 CCDC88C GSC AMFR RUVBL2 DRAXIN GRHL3 SNX3 BMP4 RSPO2 SULF1 FERMT1 STX1A ATP6V1C2 DKK1 RYK WWTR1 NLGN1 MED12 GPC3 LRP5 DDB1 CTNND1 DKK3 C3 SMARCA4 FZD4 BCL9L ADGRA2 FZD5 CUL3 ISL1 SLC9A3R1 AXIN2 ITGA3 ZEB2 MDFIC TRPM4 AMER2 CDH3 ILK DVL2 NXN NDP YAP1 DACT1 TLE5 MECP2 G3BP1 RAB5A UBE2B PIN1 NKD1 DDIT3
0.0391518	9	28	2.94701	Brush border membrane	http://amigo.geneontology.org/amigo/term/GO:0031526	SLC28A1 MFSD10 ABCG2 CDHR5 CDHR2 SLC9A3R1 SLC11A2 CLTRN LRP2
0.0391518	8	23	3.18903	Chaperone complex	http://amigo.geneontology.org/amigo/term/GO:0101031	HSP90AB1 TCP1 CCT3 CCT7 CCT4 BAG3 CDC37 SDF2
0.0391518	34	188	1.65813	Eukaryotic Translation Initiation	https://reactome.org/download/current	RPS18 EIF3K RPS11 EIF3I RPS8 EIF3J RPS6 EIF3E RPL30 RPS3A RPLP2 EIF3M RPS28 RPL19 RPS21 RPS27L RPL13 EIF4H RPS17 RPL29 RPL26 RPS7 RPL7 RPS15 RPS2 RPL35 RPL17 RPL23A RPS15A RPL32 RPS25 RPL23 RPL28 RPS24
0.0391518	34	188	1.65813	Cap-dependent Translation Initiation	https://reactome.org/download/current	RPS18 EIF3K RPS11 EIF3I RPS8 EIF3J RPS6 EIF3E RPL30 RPS3A RPLP2 EIF3M RPS28 RPL19 RPS21 RPS27L RPL13 EIF4H RPS17 RPL29 RPL26 RPS7 RPL7 RPS15 RPS2 RPL35 RPL17 RPL23A RPS15A RPL32 RPS25 RPL23 RPL28 RPS24
0.0391518	8	23	3.18903	Formation of ATP by chemiosmotic coupling	https://reactome.org/download/current	ATP5F1B ATP5MC1 ATP5ME DMAC2L ATP5PD ATP5F1C ATP5F1D ATP5PB
0.0391518	8	23	3.18903	Cristae formation	https://reactome.org/download/current	ATP5F1B ATP5MC1 ATP5ME DMAC2L ATP5PD ATP5F1C ATP5F1D ATP5PB
0.0391518	8	23	3.18903	PW:0001078 cysteine and methionine metabolic pathway	ftp://ftp.rgd.mcw.edu/pub/data_release	IL4I1 AMD1 MTAP MTR LDHA DNMT1 AHCYL2 SDS
0.0391518	9	28	2.94701	Viral release from host cell	http://amigo.geneontology.org/amigo/term/GO:0019076	TRIM26 TRIM15 VPS4B TRIM32 RAB7A PC DDB1 VPS37B TRIM28
0.0391518	40	231	1.58761	Methylation	http://amigo.geneontology.org/amigo/term/GO:0032259	JARID2 PHF1 RPL22 WTAP ARMT1 MTAP VIRMA LMNA CAMKMT DPY30 COQ5 SMARCB1 SUV39H2 DALRD3 RBM15B WDR82 MORC1 PAXBP1 HSD17B10 OGT TRMT112 PRMT3 DOT1L CARM1 DNMT1 ETF1 GCG KMT2C CHTOP SNW1 MEPCE CTCF WDR5 KDM4A FBL TRMT61A MECP2 IWS1 TRIM28 TYMS
0.0391518	63	403	1.43328	Cell junction organization	http://amigo.geneontology.org/amigo/term/GO:0034330	ACVRL1 PTPRO AMIGO2 TUBB PKHD1 GPHN LGMN RCC2 WASF2 MAPRE2 ADGRL2 CDC20 GJA10 LRFN5 TNC YWHAZ IGSF9 BCAN RHOC DLC1 ACTB NPHP1 THSD1 SEMA4D CORO1C ACTN2 BSN NLGN1 HRG PAK2 ARHGAP6 IL1RAPL1 SRPX2 SLC9A6 SLITRK2 C3 LAMC1 ALS2 FZD5 DBNL BAIAP2 ITGB4 ITGA3 NTN1 MESD RHOA PHLDB2 FLOT1 GRHL1 VPS35 TNS1 COLQ GABRA2 ANAPC2 GABRB2 INS SNAPIN MECP2 RAC1 WDR1 CLN3 PLEC PALM
0.0391518	9	28	2.94701	Exit from host	http://amigo.geneontology.org/amigo/term/GO:0035890	TRIM26 TRIM15 VPS4B TRIM32 RAB7A PC DDB1 VPS37B TRIM28
0.0391518	9	28	2.94701	Exit from host cell	http://amigo.geneontology.org/amigo/term/GO:0035891	TRIM26 TRIM15 VPS4B TRIM32 RAB7A PC DDB1 VPS37B TRIM28
0.0391518	8	23	3.18903	Wound healing, spreading of cells	http://amigo.geneontology.org/amigo/term/GO:0044319	ACVRL1 ARHGAP35 PDPN CCN1 FERMT1 PHLDB2 CARMIL2 FLNA
0.0391518	8	23	3.18903	Positive regulation of mRNA processing	http://amigo.geneontology.org/amigo/term/GO:0050685	LEO1 DAZAP1 PRDX6 SNW1 SNRNP70 NCBP2 THRAP3 TRA2B
0.0391518	8	23	3.18903	Epiboly involved in wound healing	http://amigo.geneontology.org/amigo/term/GO:0090505	ACVRL1 ARHGAP35 PDPN CCN1 FERMT1 PHLDB2 CARMIL2 FLNA
0.0396924	71	465	1.39992	Cell Cycle Mitotic	https://reactome.org/download/current	TUBA1A NUP107 TUBB CDKN1A HSP90AB1 NEK9 VRK1 CDT1 CENPT E2F4 TBCB RCC2 NUDC RPA2 CEP192 CABLES1 CDC20 PSMC6 POLE3 ODF2 LMNA PSMD4 RBL1 UBE2C CLIP1 DYNLL1 DNA2 ACTR1A MCM2 STAG1 PHF8 BANF1 POLA2 PPP2R5B RAPSN LMNB1 ANAPC15 AKAP9 PSMC2 ORC5 TPR CENPF MCPH1 GORASP2 PSMD1 CEP41 PSME3 TAOK1 CDC16 CEP250 ERCC6L OPTN H3F3B PPP2R1A CDK4 PSMB1 ZWINT FEN1 NUP35 PTK6 ANAPC2 SPC24 RBX1 GINS1 ANAPC11 PSMD9 EM…
0.0397446	25	126	1.81914	Fibrillar center	http://amigo.geneontology.org/amigo/term/GO:0001650	TXNRD1 FBLIM1 TAF4B LEO1 TERF1 SELENBP1 EEF1D CD2BP2 USO1 PSPC1 SMARCB1 NOLC1 DKC1 TIMM44 UTP15 TCOF1 ACACA NRIP1 PAFAH1B2 KDM4A NOP56 FBL URB1 FOXJ2 THAP1
0.0397446	13	50	2.3838	Maintenance of protein location	http://amigo.geneontology.org/amigo/term/GO:0045185	SUN2 KDELR1 PARK7 ANKRD13C YWHAB PKD1 HK1 HNRNPU FBN2 BARD1 NRROS FLNA OS9
0.0407132	209	1593	1.20289	Regulation of developmental process	http://amigo.geneontology.org/amigo/term/GO:0050793	PARVB DDX17 ACVRL1 KRT84 RARG YBX3 AMIGO2 RIPK1 CDKN1A DAAM2 HSP90AB1 RUNX2 PKHD1 BNC1 SIN3A ARG2 SIPA1L1 LGMN CEBPA ARHGAP35 IL4I1 PIK3CD DRAXIN PDPN RCC2 GRHL3 EPB41 ADGRL2 CTH OMA1 CDC20 SMOC2 CITED2 CCN2 RIMS1 CD109 TPM1 TCF12 LEO1 CAPN3 TJP1 CCBE1 BMP4 ANXA1 EXOSC3 TRIM32 RAB14 RSPO2 YWHAZ SULF1 TOX SDCBP DDR2 SPTA1 CRABP2 LMNA STRIP1 CCN1 DNAI3 DLC1 FERMT1 RBL1 CASS4 GTF2I ZC3H8 ATOH8 CRIM1…
0.0407347	14	56	2.29212	Cellular component assembly involved in morphogenesis	http://amigo.geneontology.org/amigo/term/GO:0010927	ACRBP CFL2 SPACA1 TPM1 CAPN3 CASQ1 ACTN2 NEBL LMOD2 ITGB4 PHLDB2 TBC1D20 WDR1 CAV3
0.040802	49	298	1.50757	GTPase activator activity	http://amigo.geneontology.org/amigo/term/GO:0005096	ARHGAP9 PLEKHG6 SIPA1L1 CCDC88C RIN3 ARHGEF1 ARHGAP35 DOCK7 RGS4 DENND2C DLC1 ARFGEF2 ELMOD2 DIS3 ARHGEF7 RASGEF1A EIF2B5 ARHGAP6 ARHGEF9 MCF2 MADD ARFGAP2 DENND1C VAV1 RGS14 RASGRF2 FNIP1 LAMTOR1 ARAP1 ELMOD1 ALS2 AGFG1 HTR2B NGEF CYTH1 ARHGEF5 ARHGEF16 SH3BP5 ARHGAP31 RALGAPA2 FARP1 ARHGEF28 RASGEF1B ARHGEF6 RALGAPA1 RGS1 RAP1GAP2 TBC1D20 RGS8
0.040802	15	62	2.21818	Purine ribonucleoside triphosphate metabolic process	http://amigo.geneontology.org/amigo/term/GO:0009205	ATP5F1B ATP5F1A RAN ATP6V1A ATP5MC1 NME2 ATP5ME ATP5PD ALDOA ATP5MF ATP5F1C PID1 ATP5F1D ATP5PB STOML2
0.0411191	23	113	1.86615	Nucleobase-containing compound transport	http://amigo.geneontology.org/amigo/term/GO:0015931	NUP107 RIPK1 SRSF3 SLC28A1 LRRC8C RAN RBM15B SLC25A5 THOC2 SLC29A2 DDX39A AKAP8L TPR NPM1 CHTOP FLOT1 KHDRBS1 SLC35A2 LOC110257686 YBX1 SLC25A6 IWS1 HNRNPA2B1
0.0411191	23	113	1.86615	Negative regulation of cellular amide metabolic process	http://amigo.geneontology.org/amigo/term/GO:0034249	LSM14A PNLDC1 EXOSC3 RIDA CLU SAMD4B CALR RPS3 DCPS TPR STAT3 ORMDL3 DCP1A EIF6 TARDBP IGF2BP1 TIA1 YTHDF2 EIF2S1 TNRC6A PIN1 YTHDF1 TYMS
0.0413349	6	14	3.92934	Exosomal secretion	http://amigo.geneontology.org/amigo/term/GO:1990182	VPS4B COPS5 SDCBP RAB7A ATP13A2 HGS
0.0413349	6	14	3.92934	Insertion of tail-anchored proteins into the endoplasmic reticulum membrane	https://reactome.org/download/current	STX1A SGTA ALDH3A2 EMD SEC61B HMOX1
0.0413349	6	14	3.92934	PW:0000105 Rho/Rac/Cdc42 mediated signaling pathway	ftp://ftp.rgd.mcw.edu/pub/data_release	SORBS1 CBL BAIAP2 RHOA FLNA RAC1
0.0413349	6	14	3.92934	Positive regulation by host of viral transcription	http://amigo.geneontology.org/amigo/term/GO:0043923	EP300 SMARCB1 SMARCA4 RRP1B NUCKS1 SNW1
0.0415873	28	147	1.74637	Receptor-mediated endocytosis	http://amigo.geneontology.org/amigo/term/GO:0006898	BICD1 RIN3 CAP1 SDCBP TFR2 GRK4 CLU HIP1R ANKRD13A DKK1 LDLRAD3 C3 CBL HTR2B ACKR3 DBNL GRB2 CLTC FLOT1 HNRNPK SNX17 SERPINE1 MAGI2 CLN3 PPT1 RAB5A CAV3 LRP2
0.0417947	11	39	2.58598	Actin nucleation	http://amigo.geneontology.org/amigo/term/GO:0045010	DNAI3 ARPC1B HIP1R ARPC3 ARPC4 ARPC5 ACTR3 LMOD2 GMFB WAS GSN
0.0424743	57	359	1.45572	Response to hormone	http://amigo.geneontology.org/amigo/term/GO:0009725	EP300 DDX17 GPLD1 ACSBG1 PARK7 LEPROT CITED2 BMP4 JAK2 ANXA1 CA2 RXRG DDRGK1 NCOA5 ARID5A SLIT2 USO1 NCOR2 YWHAH ACTN2 HNRNPU PIP4K2A UBA5 HCLS1 OGT RELA SMARCA4 CALR AKAP8 CRHBP BRD8 CAMK2A TFPI GRB2 STAT3 PHB ACACA WBP2 RHOA NUCKS1 EIF6 CTSB LANCL2 CDK4 IL20RB URI1 POU4F2 EPM2AIP1 PTPN11 YAP1 DDX5 INS GDF15 PID1 VGF KANK2 LRP2
0.0425615	5	10	4.58423	Positive regulation of exosomal secretion	http://amigo.geneontology.org/amigo/term/GO:1903543	VPS4B SDCBP RAB7A ATP13A2 HGS
0.0425615	5	10	4.58423	Negative regulation of amyloid fibril formation	http://amigo.geneontology.org/amigo/term/GO:1905907	PFDN2 PFDN4 CLU CRYAB PFDN1
0.0425615	5	10	4.58423	Methylosome	http://amigo.geneontology.org/amigo/term/GO:0034709	ERH CLNS1A SNRPE SNRPG SNRPD2
0.0425615	5	10	4.58423	Ubiquitin-ubiquitin ligase activity	http://amigo.geneontology.org/amigo/term/GO:0034450	AMFR UBE4B PPIL2 UBE2K RBX1
0.0425615	38	218	1.59817	Regulation of cell growth	http://amigo.geneontology.org/amigo/term/GO:0001558	ACVRL1 SLC44A4 CDKN1A SIN3A MMP14 DRAXIN EPB41L3 RIMS1 INO80 IGFBPL1 TRIM32 SDCBP CRABP2 SLIT2 SEMA4D LGI1 RYK HRG RBBP7 EIF4G2 SMARCA4 CDHR2 LAMTOR1 SERPINE2 NPM1 PHB NTN1 CDA KAZALD1 URI1 POU4F2 TAF9B SERTAD1 RACK1 RIMS2 NDUFS3 PPT1 MYL2
0.0425615	5	10	4.58423	SLBP Dependent Processing of Replication-Dependent Histone Pre-mRNAs	https://reactome.org/download/current	SNRPF SNRPD3 SNRPE SNRPG NCBP2
0.0425615	5	10	4.58423	Mitochondrial ATP synthesis coupled proton transport	http://amigo.geneontology.org/amigo/term/GO:0042776	ATP5F1A ATP5F1C ATP5F1D ATP5PB STOML2
0.0425615	63	405	1.42621	Blood vessel morphogenesis	http://amigo.geneontology.org/amigo/term/GO:0048514	ACVRL1 GPLD1 CDH13 WASF2 SMOC2 CITED2 CCN2 MYO1E TJP1 CCBE1 BMP4 ANXA1 YWHAZ SULF1 CCN1 PANK2 GTF2I EMILIN1 SLIT2 SPRY2 MYO18B JCAD STAB1 HRG MYLK SRPX2 LRP5 C3 FZD4 ANGPT2 ADGRA2 ACVR1 FZD5 ACKR3 HOXA5 ISL1 STAT3 FKBP10 SERPINF1 RHOA HSPB6 CLEC14A SERPINE1 DLL1 XBP1 YAP1 HGS SASH1 GPX1 PDCL3 MECP2 MYDGF JMJD6 FGF8 ATF2 MEIS1 FOXJ2 HMOX1 EPN2 EYA1 LRP2 APOH TNNI3
0.0427088	18	81	2.03744	Lysosomal transport	http://amigo.geneontology.org/amigo/term/GO:0007041	VIPAS39 AP1G1 IGF2R VPS4B GCC2 LAMP1 LYST PSAP RAB7A GPRASP1 ALS2 VPS35 VAMP7 ATP13A2 HGS SNAPIN CLN3 RBSN
0.0429641	37	211	1.60774	DOID:9007383 Chemical and Drug Induced Liver Injury	ftp://ftp.rgd.mcw.edu/pub/data_release	VEGFA POLG CYP1A2 CFAP20 GPT2 CAP1 ECHDC1 SELENBP1 ACTB ATOH8 GRK4 NFXL1 PDLIM5 CLU VIM UBA5 SENP2 PLS3 AIFM1 DDB1 C3 FCMR ACTR3 GSR AASS BLVRB REEP5 BRD4 LAP3 IMMT G6PD COQ9 ATP6V1D HPRT1 GSN GCLM APOH
0.0432646	112	793	1.29492	Embryo development	http://amigo.geneontology.org/amigo/term/GO:0009790	EP300 ACVRL1 RARG YBX3 CECR2 TXNRD1 RUNX2 SIN3A MMP14 CCNB1IP1 ITPK1 GSC CEBPA GPI ARHGAP35 GRHL3 PNLDC1 MTHFD1L CITED2 SOBP MYO1E LEO1 COPS2 TJP1 BMP4 RPS6 ANKS6 RAB14 RSPO2 SULF1 CRABP2 PHGDH COL11A1 CCN1 POLB PSPH IFT140 PKD1 SEMA4C ATOH8 SPRY2 CUL4A MYO18B SMARCB1 RYR2 SEC24C DKK1 NOLC1 SH3PXD2A TPRA1 SKIL MED12 GPC3 LRP5 PRKCSH DNMT1 FBN2 NDUFA2 TCOF1 LAMB1 ACVR1 FZD5 CUL3 HTR2B EXOC4 HOXA5 …
0.0436769	20	94	1.95074	S Phase	https://reactome.org/download/current	CDKN1A CDT1 RPA2 CABLES1 POLE3 UBE2C DNA2 MCM2 STAG1 POLA2 ANAPC15 ORC5 CDC16 CDK4 FEN1 PTK6 ANAPC2 RBX1 GINS1 ANAPC11
0.0443378	17	75	2.07818	Establishment of RNA localization	http://amigo.geneontology.org/amigo/term/GO:0051236	NUP107 SRSF3 TERF1 RAN RBM15B THOC2 DDX39A AKAP8L TPR NPM1 CHTOP FLOT1 KHDRBS1 LOC110257686 YBX1 IWS1 HNRNPA2B1
0.0444492	12	45	2.44492	PDZ domain binding	http://amigo.geneontology.org/amigo/term/GO:0030165	CCDC88C SDC2 CRIM1 LNX2 NLGN1 FZD4 EXOC4 ACOX1 SLC9A3R1 ARHGEF16 LLGL2 NKD1
0.0449379	71	468	1.39094	Cellular response to cytokine stimulus	http://amigo.geneontology.org/amigo/term/GO:0071345	TUBA1A RARG YBX3 IL17REL RIPK1 JARID2 SRSF3 HSP90AB1 CEBPA LSM14A CTH JAK2 TRIM32 HDGF CRNN IL1R1 SRSF7 SLIT2 SPRY2 TNFSF13B INA CTBP2 HNRNPU KIF5B VIM MCM2 HCLS1 SLC25A5 RBMX MCF2 IRF7 RELA CDC37 ICAM1 CRHBP SLC12A2 RPS3 FZD4 CACYBP TPR ACTR3 ACKR3 IRF5 ADAMTS12 IL6ST CDC42EP4 STAT3 PHB GPS2 RHOA MAT2A ILK CDK4 POU4F2 YTHDF2 YBX1 NUP35 YAP1 AIF1 UBE2K BAG4 PID1 TXNDC17 EEF1E1 WAS SAA2 GSN GCLM A…
0.0453317	51	315	1.48442	Monocarboxylic acid metabolic process	http://amigo.geneontology.org/amigo/term/GO:0032787	MCAT EP300 ABCD2 ACSBG1 CYP1A2 GPI IL4I1 NR1H2 ETFB ACOT7 PARK7 ACADM MTHFD1L PEX2 CRABP2 PHGDH ACSS1 PANK2 HAGH PEX13 ETFDH NAAA HADH HPGDS ACADS HK1 PGAM1 OXSM HSD17B10 OGT CPT1A PC ACSBG2 DLAT LPGAT1 ACSL3 ACOX1 GALK1 STAT3 ACACA CRABP1 EIF6 SLC2A6 PIBF1 PDHB ALDH8A1 ALDOA GPX1 INS SDS CES1
0.0454864	78	523	1.36738	Chordate embryonic development	http://amigo.geneontology.org/amigo/term/GO:0043009	EP300 ACVRL1 RARG YBX3 CECR2 RUNX2 SIN3A CCNB1IP1 ITPK1 GSC CEBPA GPI ARHGAP35 GRHL3 PNLDC1 MTHFD1L CITED2 MYO1E COPS2 TJP1 BMP4 ANKS6 SULF1 PHGDH COL11A1 CCN1 POLB PSPH IFT140 PKD1 SEMA4C CUL4A MYO18B SMARCB1 SEC24C NOLC1 SH3PXD2A SKIL MED12 PRKCSH NDUFA2 TCOF1 ACVR1 FZD5 CUL3 HOXA5 ISL1 GRB2 AXIN2 TANC2 FKBP10 HOXB4 GGNBP2 COPS3 TAPT1 CHTOP ATM DVL2 DLL1 YBX1 NXN YAP1 DACT1 XRCC2 BPTF HOXC9 GIN…
0.0455375	16	69	2.12602	ATP-dependent activity, acting on DNA	http://amigo.geneontology.org/amigo/term/GO:0008094	XRCC6 RUVBL2 ASCC3 INO80 RAD51 FANCM DNA2 SMARCA4 CHD3 BRIP1 ERCC6L TWNK XRCC2 RFFL BPTF G3BP1
0.0457985	91	626	1.3328	Negative regulation of molecular function	http://amigo.geneontology.org/amigo/term/GO:0044092	PTPRO CDKN1A PKHD1 SIN3A AKAP5 NQO1 PARK7 RCC2 CEP192 HDAC2 NDN BMP4 TERF1 NES ACTB CD2BP2 ERCC4 PKD1 RBM26 SPRY2 SEMA4D CORO1C ACTN2 DKK1 PRDX3 HNRNPU PIP4K2A EFHB PRKAR2A MCM2 WWTR1 SLC7A14 PAK2 LRP5 PRDX2 PKN1 RGS14 CRHBP FNIP1 CHORDC1 UBASH3B MGAT5 TFPI SERPINE2 NPM1 CHMP6 TIMP2 SLC9A3R1 ORMDL3 GGNBP2 UBQLN1 RRP1B NUCKS1 CRMP1 UCHL1 MEPCE TRIM37 SERPINE1 URI1 STMN1 CEP85 FARP1 ATP5IF1 CD200 T…
0.0460046	13	51	2.33706	Lamellipodium assembly	http://amigo.geneontology.org/amigo/term/GO:0030032	PARVB PTPRO CDH13 WASF2 SLIT2 ARHGEF7 ABLIM1 HRG ACTR3 CARMIL2 IL20RB RAC1 WAS
0.0461079	62	399	1.42467	DOID:0060799 syndromic X-linked intellectual disability Lubs type	ftp://ftp.rgd.mcw.edu/pub/data_release	ASB11 RBBP7 REPS2 RAI2 ACOT9 IL1RAPL1 MED14 CDK16 UBA1 ZNF157 GSPT2 HSD17B10 PHF8 MED12 OGT PCDH19 SRPX2 XKRX CENPI TIMM8A ZMAT1 GPRASP1 GPRASP2 TCEAL1 NRK RNF128 RBM41 PLS3 SLC25A5 THOC2 PRR32 XPNPEP2 AIFM1 ZNF280C IGSF1 GPC3 FAM122B SLC9A6 RBMX MCF2 SLITRK2 CNGA2 CCNQ PDZD4 NAA10 ERCC6L HTATSF1 TMEM47 SLC35A2 VGLL1 TAF9B KLHL15 RTL9 RLIM NDP ARHGEF6 SPIN3 MECP2 HPRT1 AP1S2 WAS HDX
0.0462159	15	63	2.18297	Chromosome localization	http://amigo.geneontology.org/amigo/term/GO:0050000	NUDC VPS4B TERF1 LMNA HNRNPU CENPF ACTR3 CUL3 CHMP6 MEIOC CHMP1A PIBF1 ATM UBE2B NDE1
0.0462159	15	63	2.18297	Lamellipodium organization	http://amigo.geneontology.org/amigo/term/GO:0097581	PARVB PTPRO CDH13 PDPN WASF2 SLIT2 ARHGEF7 CORO1C ABLIM1 HRG ACTR3 CARMIL2 IL20RB RAC1 WAS
0.0463696	14	57	2.2519	Histone methyltransferase complex	http://amigo.geneontology.org/amigo/term/GO:0035097	JARID2 PHF1 RUVBL2 HDAC2 DPY30 WDR82 RBBP7 KMT2C TRIM37 TAF4 WDR5 TAF6 MAX CBX5
0.0463696	14	57	2.2519	Fatty acid metabolism	http://www.genome.jp/kegg-bin/show_pathway?ssc01212	MCAT ACSBG1 ACADM HADH ACADS OXSM CPT1A ACSBG2 ACSL3 ACACA CPT1C PODN TECR PPT1
0.0470649	25	128	1.79072	Cellular respiration	http://amigo.geneontology.org/amigo/term/GO:0045333	CYP1A2 DLST PARK7 ATP5F1A PANK2 TRAP1 IDE NDUFB6 UQCRC1 NDUFS6 SDHA RHOA ISCU COX5A COQ9 MDH1 FH NDUFS3 IDH3A ATP5F1C ATP5F1D SHMT2 ATP5PB NDUFA5 STOML2
0.0471772	88	603	1.33802	Response to abiotic stimulus	http://amigo.geneontology.org/amigo/term/GO:0009628	XRCC6 EP300 YBX3 GPLD1 CDKN1A HSP90AB1 SLC12A6 LGMN DNAJA2 HIF3A RUVBL2 UBE4B ACADM MAP3K4 CITED2 GJA10 CAPN3 INO80 RAD51 PSIP1 TRIM32 CASQ1 LMNA CRNN GNAT2 COL11A1 ERCC4 HMOX2 PKD1 MAP4K3 HVCN1 RYR2 PKD2L1 HIF1AN BAG3 SUV39H2 SLC38A3 XPC TSC22D2 EIF2B5 MYLK ATP6V1A RBBP7 PPP1CA RELA DDB1 TMEM109 MAP2K7 PKN1 CHORDC1 MMP1 USP28 MDM4 TPR DTL SERPINE2 HTR2B RAD1 NPM1 GRB2 MAP2K4 MSH6 UBQLN1 NDRG4 NU…
0.0477146	7	19	3.37785	SNARE complex	http://amigo.geneontology.org/amigo/term/GO:0031201	STX1A SNAP29 STX3 BNIP1 SYN2 VAMP7 BLOC1S6
0.0477146	26	135	1.76578	Spinocerebellar ataxia	http://www.genome.jp/kegg-bin/show_pathway?ssc05017	ITPR3 ATG2B PIK3CD OMA1 PSMC6 PSMD4 GTF2B PLCB4 PUM2 SAMD8 SLC25A5 RAPSN VDAC1 PSMC2 PSMD1 TBPL1 PSMB1 NOP56 GRIN3B TWNK XBP1 SLC25A6 PSMD9 ADRM1 AKT1 PSMC4
0.0477146	7	19	3.37785	DOID:0060674 catecholaminergic polymorphic ventricular tachycardia	ftp://ftp.rgd.mcw.edu/pub/data_release	TPM1 LMNA RYR2 MTR AKAP9 TRPM4 DSG2
0.0477146	18	82	2.01259	Response to topologically incorrect protein	http://amigo.geneontology.org/amigo/term/GO:0035966	EP300 AMFR COPS5 ATF6 DDRGK1 VAPB CLU UFD1 BAG3 CUL3 OPTN IL20RB KLHL15 XBP1 WFS1 EIF2S1 HERPUD1 DDIT3
0.0477146	7	19	3.37785	RIG-I signaling pathway	http://amigo.geneontology.org/amigo/term/GO:0039529	USP15 TRIM15 LSM14A PUM2 UFD1 PHB C1QBP
0.0477146	7	19	3.37785	Cell cycle DNA replication	http://amigo.geneontology.org/amigo/term/GO:0044786	INO80 RAD51 RTF2 DACH1 DNA2 DBF4B ZNF830
0.0480122	9	29	2.84538	Citrate cycle (TCA cycle)	http://www.genome.jp/kegg-bin/show_pathway?ssc00020	DLST PC DLAT DLD MDH1 PDHB FH IDH3A CS
0.0480289	27	142	1.7433	Mitotic Anaphase	https://reactome.org/download/current	TUBA1A NUP107 VRK1 CENPT RCC2 NUDC CDC20 LMNA UBE2C CLIP1 DYNLL1 STAG1 BANF1 PPP2R5B LMNB1 ANAPC15 CENPF TAOK1 CDC16 ERCC6L PPP2R1A ZWINT ANAPC2 SPC24 ANAPC11 EMD NDE1
0.0480289	27	142	1.7433	Reactive oxygen species metabolic process	http://amigo.geneontology.org/amigo/term/GO:0072593	CDKN1A CYP1A2 ARG2 PARK7 CCN2 CCN1 SH3PXD2A PRDX3 VAV1 PRDX2 VDAC1 MMP1 NNT ACOX1 GRB2 AATF RHOA EIF6 CYB5R4 NRROS ATP5IF1 NDUFS3 NOXA1 GPX1 INS PID1 SOD2
0.0481921	54	339	1.46046	Positive regulation of hydrolase activity	http://amigo.geneontology.org/amigo/term/GO:0051345	HSP90AB1 AHSA1 LGMN PDCD5 NR1H2 RCC2 GRHL3 MAPRE2 DOCK7 RHOC CCN1 DLC1 DDRGK1 ANTXR1 ELMOD2 ARHGEF7 SEMA4D HIP1R DIABLO CORO1C PSAP ABHD5 ARHGAP6 AIFM1 VAV1 RGS14 ARAP1 RPS3 ELMOD1 AVPR1B DNAJC10 ALS2 HTR2B STAT3 PHB RHOA CHTOP ARHGEF5 PDGFRB RPS27L ARHGEF16 DVL2 ARHGAP31 RALGAPA2 CD200 RACK1 MAGI2 RALGAPA1 RGS1 C7H6orf89 TBC1D20 PIN1 RGS8 APOH
0.0483983	31	170	1.6719	Nonsense Mediated Decay (NMD) independent of the Exon Junction Complex (EJC)	https://reactome.org/download/current	RPS18 RPS11 RPS8 RPS6 RPL30 RPS3A GSPT2 RPLP2 RPS28 ETF1 RPL19 RPS21 RPS27L RPL13 NCBP2 RPS17 RPL29 RPL26 RPS7 RPL7 RPS15 RPS2 RPL35 RPL17 RPL23A RPS15A RPL32 RPS25 RPL23 RPL28 RPS24
0.0488631	8	24	3.05615	Sex chromosome	http://amigo.geneontology.org/amigo/term/GO:0000803	SMARCB1 HNRNPU SIN3B H3F3B SMCHD1 PCGF3 MACROH2A2 UBE2B
0.0488631	8	24	3.05615	Insulin-like growth factor binding	http://amigo.geneontology.org/amigo/term/GO:0005520	IGF2R CCN2 IGFBPL1 CCN1 CRIM1 ITGB4 KAZALD1 IGFBP2
0.0488631	11	40	2.52133	Signaling by Retinoic Acid	https://reactome.org/download/current	RARG RXRG CRABP2 CPT1A DLAT DLD DHRS9 CRABP1 PDHB ALDH8A1 ALDH1A1
0.0488631	8	24	3.05615	Histone phosphorylation	http://amigo.geneontology.org/amigo/term/GO:0016572	VRK1 JAK2 PKN1 AKAP8 AKAP8L HIPK4 ATM UBE2B
0.0488631	8	24	3.05615	Nuclear-transcribed mRNA catabolic process, nonsense-mediated decay	http://amigo.geneontology.org/amigo/term/GO:0000184	DHX34 EIF3E RNPS1 UPF3A NCBP2 SECISBP2 RBM8A SMG1
0.0488631	8	24	3.05615	Vesicle docking	http://amigo.geneontology.org/amigo/term/GO:0048278	STX1A CTBP2 STX3 STXBP2 EXOC4 NDRG4 PPFIA3 CLN3
0.0488631	8	24	3.05615	Response to interleukin-6	http://amigo.geneontology.org/amigo/term/GO:0070741	RIPK1 CEBPA RELA IL6ST STAT3 PHB YAP1 PID1
0.0488631	8	24	3.05615	Epiboly	http://amigo.geneontology.org/amigo/term/GO:0090504	ACVRL1 ARHGAP35 PDPN CCN1 FERMT1 PHLDB2 CARMIL2 FLNA
0.0490643	17	76	2.05084	DOID:332 amyotrophic lateral sclerosis	ftp://ftp.rgd.mcw.edu/pub/data_release	VEGFA KIF1B VAPB NEK1 C3 SQSTM1 GSR ALS2 GFAP SERPINF1 TARDBP OPTN BPTF SLC11A2 BCL2L1 AKT1 PSMC4
0.0490643	17	76	2.05084	Spindle assembly	http://amigo.geneontology.org/amigo/term/GO:0051225	TUBB LSM14A CEP192 CDC20 INO80 VPS4B DRG1 BCCIP HNRNPU STAG1 RPS3 TPR ZNF207 RHOA CHMP1A PIBF1 FLNA
0.049602	24	122	1.80363	Chromosome, centromeric region	http://amigo.geneontology.org/amigo/term/GO:0000775	NUP107 SIN3A CENPT RCC2 TTK IVD MTBP DYNLL1 HNRNPU CENPI DNMT1 TPR CENPF CBX1 ZNF207 CTCF PPP2R1A KDM4A ZWINT SPC24 SS18L1 IKZF1 CBX5 NDE1
0.049602	24	122	1.80363	DNA Replication	https://reactome.org/download/current	CDT1 RPA2 PSMC6 POLE3 PSMD4 UBE2C DNA2 MCM2 POLA2 RAPSN ANAPC15 PSMC2 ORC5 PSMD1 PSME3 CDC16 PSMB1 FEN1 ANAPC2 RBX1 GINS1 ANAPC11 PSMD9 PSMC4
0.049602	24	122	1.80363	Regulation of plasma membrane bounded cell projection assembly	http://amigo.geneontology.org/amigo/term/GO:0120032	MAK ARHGAP35 RCC2 WASF2 IFT140 SLIT2 CORO1C HRG ICAM1 ARAP1 ACTR3 MYO10 SEPTIN9 CDC42EP4 TAPT1 CARMIL2 YAP1 RAC1 CLN3 WAS RAB5A PALM RP1 RALA
0.0497351	85	581	1.34134	Regulation of response to external stimulus	http://amigo.geneontology.org/amigo/term/GO:0032101	XRCC6 USP15 RIPK1 TRIM15 HSP90AB1 SIN3A ARG2 RIN3 LGMN HSP90AA1 CDH13 AP1G1 CEBPA LSM14A SMOC2 NT5E CD109 CAPN3 LRFN5 JAK2 ANXA1 IL1R1 PUM2 SLIT2 ELMOD2 STK24 LAMP1 PSPC1 MN1 UFD1 PRKG1 RYK HRG NFKBIZ IRF7 RELA TKFC STX3 SWAP70 C3 VAV1 CDC37 PRDX2 CALR CTSC RNF26 UBASH3B ST3GAL4 ANGPT2 MCPH1 ADGRA2 TBR1 TFPI SERPINE2 ADAMTS12 ISL1 GPS2 RNF216 DAPK2 PHLDB2 SNW1 OPTN TRAF3IP1 SERPINE1 POU4F2 VPS35 …
0.0501581	77	518	1.36288	Response to cytokine	http://amigo.geneontology.org/amigo/term/GO:0034097	TUBA1A RARG YBX3 IL17REL RIPK1 JARID2 SRSF3 HSP90AB1 CEBPA LSM14A CTH JAK2 TRIM32 HDGF CRNN IL1R1 MAP4K3 SRSF7 SLIT2 SPRY2 TNFSF13B INA CTBP2 HNRNPU KIF5B VIM ITIH4 MCM2 HCLS1 SLC25A5 RBMX MCF2 IRF7 RELA MAP2K7 CDC37 ICAM1 CRHBP SLC12A2 RPS3 FZD4 CACYBP TPR ACTR3 ACKR3 IRF5 ADAMTS12 IL6ST CDC42EP4 STAT3 PHB GPS2 RHOA MAT2A ILK CDK4 POU4F2 YTHDF2 YBX1 NUP35 YAP1 TLE5 AIF1 UBE2K BAG4 PID1 BCL2L1 TX…
0.0506172	16	70	2.09565	Exocytic vesicle	http://amigo.geneontology.org/amigo/term/GO:0070382	CPLX3 COPS5 SYPL2 STX1A SEMA4C LAMP1 CDK16 TMED9 ICA1 SYPL1 SYN2 GABRA2 SYNGR2 SNAPIN CLN3 PPT1
0.0506172	16	70	2.09565	Positive regulation of actin filament polymerization	http://amigo.geneontology.org/amigo/term/GO:0030838	DNAI3 ARPC1B HIP1R ARPC3 ARPC4 ARPC5 ACTR3 LMOD2 GRB2 CARMIL2 IL20RB GMFB BAG4 VASP WAS GSN
0.050873	50	310	1.47878	Nucleoside phosphate metabolic process	http://amigo.geneontology.org/amigo/term/GO:0006753	EP300 ATP5F1B GPI ACOT7 PARK7 CTPS1 NT5E ATP5F1A DPYS DPYD EEF1D ACSS1 PANK2 PAICS RAN HK1 ADK PGAM1 OXSM QRICH1 ATP6V1A OGT GUK1 GALK1 STAT3 ATP5MC1 NME2 ACACA PIPOX CDA AMPD3 EIF6 ATP5ME SLC2A6 PDHB GMPR PPCDC AK2 ATP5PD ALDOA INS ATP5MF ATP5F1C HPRT1 PID1 ATP5F1D MCEE ATP5PB STOML2 TYMS
0.0515198	22	109	1.85052	Contractile fiber	http://amigo.geneontology.org/amigo/term/GO:0043292	DEK CFL2 PGM5 TRIM32 TMOD4 TNNC2 MYO18B RYR2 ACTN2 ACTA2 BAG3 NEBL FXR1 LMOD2 SYNC PALLD TNNI2 MYOM3 CRYAB PLEC MYL2 TNNI3
0.0515198	37	214	1.5852	Exocytosis	http://amigo.geneontology.org/amigo/term/GO:0006887	CPLX3 AP1G1 RIMS1 VPS4B ANXA1 COPS5 SDCBP CD84 SYT6 STX1A LAMP1 CTBP2 RAB7A NLGN1 IL1RAPL1 CDK16 STX3 STXBP2 CRHBP TRAPPC11 EXOC4 PPFIA3 LIN7C SYN2 VAMP7 ATP13A2 RIMS2 HGS LLGL2 SNAPIN TNFAIP2 EXOC3L4 RAB5A RIMS3 EXOC3 STXBP5L RALA
0.0515198	27	143	1.73111	Mitotic Metaphase and Anaphase	https://reactome.org/download/current	TUBA1A NUP107 VRK1 CENPT RCC2 NUDC CDC20 LMNA UBE2C CLIP1 DYNLL1 STAG1 BANF1 PPP2R5B LMNB1 ANAPC15 CENPF TAOK1 CDC16 ERCC6L PPP2R1A ZWINT ANAPC2 SPC24 ANAPC11 EMD NDE1
0.0515198	22	109	1.85052	Regulation of actin filament polymerization	http://amigo.geneontology.org/amigo/term/GO:0030833	TMOD2 TMOD4 DNAI3 ARPC1B SLIT2 HIP1R ARPC3 ARPC4 HCLS1 ARPC5 ACTR3 LMOD2 GRB2 CARMIL2 IL20RB GMFB SSH3 CAPZA2 BAG4 VASP WAS GSN
0.0515198	22	109	1.85052	Cellular response to steroid hormone stimulus	http://amigo.geneontology.org/amigo/term/GO:0071383	EP300 DDX17 PARK7 BMP4 ANXA1 RXRG DDRGK1 NCOR2 YWHAH HNRNPU UBA5 SMARCA4 CALR TFPI PHB WBP2 RHOA URI1 POU4F2 YAP1 DDX5 KANK2
0.0519982	90	622	1.32663	Regulation of hydrolase activity	http://amigo.geneontology.org/amigo/term/GO:0051336	PPP6R2 HSP90AB1 SIPA1L1 AHSA1 LGMN PDCD5 NR1H2 PARK7 RCC2 GRHL3 CEP192 MAPRE2 DOCK7 TERF1 RHOC CCN1 DLC1 DDRGK1 CD2BP2 ANTXR1 ELMOD2 RBM26 SPRY2 ARHGEF7 SEMA4D HIP1R DIABLO CORO1C PSAP PRKG1 MGMT ABHD5 SLC7A14 PAK2 ARHGAP6 AIFM1 GPC3 VAV1 RGS14 FNIP1 ARAP1 RPS3 ELMOD1 AVPR1B MGAT5 DNAJC10 TFPI ALS2 SERPINE2 HTR2B ITPRID1 NPM1 TIMP2 STAT3 PHB RRP1B RHOA CHTOP ARHGEF5 PDGFRB RPS27L ARHGEF16 DVL2 SE…
0.0520848	13	52	2.29212	Chromatin DNA binding	http://amigo.geneontology.org/amigo/term/GO:0031490	EP300 H1-3 RUVBL2 GRHL3 TOX HNRNPU RELA STAT3 WBP2 CTCF GRHL1 MACROH2A2 H1-4
0.0520848	146	1078	1.24174	Cell motility	http://amigo.geneontology.org/amigo/term/GO:0048870	SUN2 ACVRL1 PTPRO GPLD1 SLC26A8 MMP14 RIN3 LGMN GAS8 CDH13 CFAP20 GPI ARHGAP35 PIK3CD PDPN RCC2 WASF2 CAP1 MAPRE2 DOCK7 SMOC2 CITED2 CCN2 ATP5F1A TPM1 SEMA6D NDN CCBE1 BMP4 ANXA1 TRIM32 SULF1 TRIM55 SDCBP DDR2 LMNA RHOC CCN1 SYDE2 DNAI3 DLC1 FERMT1 DDRGK1 CASS4 ACTB IL1R1 SEMA4C ATOH8 PEX13 EMILIN1 LRATD1 SLIT2 DACH1 SPRY2 STK24 SEMA4D CORO1C RASGEF1A PRKG1 DPCD JCAD ELP6 HRG MYLK SRPX2 LRP5 PRR5…
0.0520848	146	1078	1.24174	Localization of cell	http://amigo.geneontology.org/amigo/term/GO:0051674	SUN2 ACVRL1 PTPRO GPLD1 SLC26A8 MMP14 RIN3 LGMN GAS8 CDH13 CFAP20 GPI ARHGAP35 PIK3CD PDPN RCC2 WASF2 CAP1 MAPRE2 DOCK7 SMOC2 CITED2 CCN2 ATP5F1A TPM1 SEMA6D NDN CCBE1 BMP4 ANXA1 TRIM32 SULF1 TRIM55 SDCBP DDR2 LMNA RHOC CCN1 SYDE2 DNAI3 DLC1 FERMT1 DDRGK1 CASS4 ACTB IL1R1 SEMA4C ATOH8 PEX13 EMILIN1 LRATD1 SLIT2 DACH1 SPRY2 STK24 SEMA4D CORO1C RASGEF1A PRKG1 DPCD JCAD ELP6 HRG MYLK SRPX2 LRP5 PRR5…
0.0520848	13	52	2.29212	Ribonucleoprotein complex export from nucleus	http://amigo.geneontology.org/amigo/term/GO:0071426	NUP107 SRSF3 RAN RBM15B THOC2 DDX39A AKAP8L TPR NPM1 CHTOP LOC110257686 IWS1 HNRNPA2B1
0.0521539	14	58	2.21308	DOID:4448 macular degeneration	ftp://ftp.rgd.mcw.edu/pub/data_release	CDKN1A VEGFA IMPG1 BMP4 ATF6 ABCA4 C3 SQSTM1 GSR SERPINF1 CDH3 TRA2B SRSF10 CRYAB
0.0524848	20	96	1.9101	Vacuolar transport	http://amigo.geneontology.org/amigo/term/GO:0007034	VIPAS39 AP1G1 IGF2R VPS4B GCC2 LAMP1 LYST PSAP RAB7A GPRASP1 ALS2 CHMP6 CHMP1A VPS35 VAMP7 ATP13A2 HGS SNAPIN CLN3 RBSN
0.0524848	20	96	1.9101	Cytoskeleton-dependent intracellular transport	http://amigo.geneontology.org/amigo/term/GO:0030705	SUN2 BICD1 CCDC88C KIF17 IFT140 SPAST LAMP1 AP3M1 BLOC1S2 CCDC186 HNRNPU KIF5B UCHL1 IFT46 SNAPIN SFPQ CLN3 BLOC1S6 WDR60 NDE1
0.0533109	112	800	1.28358	Peptidyl-amino acid modification	http://amigo.geneontology.org/amigo/term/GO:0018193	EP300 RIPK1 JARID2 PHF1 HSP90AB1 SIN3A MBIP VIPAS39 VRK1 CFAP20 SAE1 RUVBL2 PARK7 CTH DOCK7 NCOA7 TTK CAPN3 JAK2 DDR2 LMNA MYLK2 CASS4 STX1A PKD1 CAMKMT QPCT DPY30 AGBL5 SPRY2 SEMA4D TPST2 SMARCB1 PPIL2 DKK1 HIF1AN PRDX3 NAA35 SUV39H2 WDR82 TADA3 RPN1 YEATS2 SENP2 HRG PAK2 HCLS1 OGT LOC100525798 RELA TRMT112 PRMT3 DOT1L CARM1 DNMT1 PKN1 FNIP1 BRD8 CAMK2A ALG8 POGLUT3 AKAP9 MGAT5 ACVR1 GCG PLCL1 I…
0.0535167	10	35	2.61956	Positive regulation of lipase activity	http://amigo.geneontology.org/amigo/term/GO:0060193	NR1H2 RHOC CCN1 ABHD5 AVPR1B HTR2B PHB RHOA PDGFRB APOH
0.0535395	55	349	1.44489	Regulation of growth	http://amigo.geneontology.org/amigo/term/GO:0040008	ACVRL1 YBX3 SLC44A4 CDKN1A SIN3A MMP14 LGMN DRAXIN EPB41L3 RIMS1 CAPN3 INO80 BMP4 IGFBPL1 TRIM32 SDCBP CRABP2 SLIT2 SEMA4D LGI1 RYK HRG RBBP7 GPC3 EIF4G2 SMARCA4 CDHR2 LAMTOR1 SERPINE2 NPM1 STAT3 PHB NTN1 CDA WWC2 KAZALD1 CDK4 URI1 POU4F2 TAF9B SERTAD1 DLL1 COLQ RACK1 YAP1 PTK6 RIMS2 NDUFS3 TLE5 GDF15 BCL2L1 FGF8 PPT1 MYL2 NKD1
0.0538895	24	123	1.78897	Regulation of endothelial cell migration	http://amigo.geneontology.org/amigo/term/GO:0010594	ACVRL1 GPLD1 LGMN GPI PIK3CD SMOC2 ATP5F1A CCBE1 BMP4 ANXA1 ATOH8 SLIT2 JCAD HRG SRPX2 CALR ANGPT2 ADGRA2 RHOA SASH1 MECP2 RAC1 HMOX1 APOH
0.0547437	104	736	1.29554	Response to biotic stimulus	http://amigo.geneontology.org/amigo/term/GO:0009607	XRCC6 USP15 TRIM26 TRIM15 HSP90AB1 SIN3A ARG2 NPC2 HSP90AA1 FBXO9 AP1G1 LSM14A IL4I1 CEP192 ADGRL2 SNX3 IGFBPL1 TRIM32 PGLYRP4 GSDMD AGBL5 PUM2 ELMOD2 DACH1 LAMP1 PSPC1 CLU OASL UFD1 LYST ACTA2 CCDC186 PRDX3 KIF5B VIM STAB1 HRG GPC3 IRF7 RELA EEF1G TKFC C3 VAV1 CDC37 PRDX2 AKAP8 CDHR2 RNF26 MR1 C4BPB ACTR3 IRF2 FZD5 ZC3HAV1 IRF5 BAIAP2 CDC42EP4 PHB RNF216 RRP1B RHOA TIRAP OPTN CDK4 TRAF3IP1 SERPI…
0.0547437	17	77	2.02421	Positive regulation of endothelial cell migration	http://amigo.geneontology.org/amigo/term/GO:0010595	GPLD1 LGMN GPI PIK3CD SMOC2 ATP5F1A CCBE1 BMP4 ANXA1 ATOH8 JCAD SRPX2 CALR ADGRA2 SASH1 RAC1 HMOX1
0.0547437	37	215	1.57783	Epithelium migration	http://amigo.geneontology.org/amigo/term/GO:0090132	ACVRL1 GPLD1 LGMN CDH13 GPI PIK3CD MAPRE2 SMOC2 ATP5F1A CCBE1 BMP4 ANXA1 FERMT1 ATOH8 SLIT2 CORO1C JCAD HRG SRPX2 CALR PKN1 ANGPT2 ADGRA2 RHOA CLEC14A PBLD PTPN11 GLIPR2 SASH1 GPX1 MECP2 RAC1 FGF8 ARSB KANK2 HMOX1 APOH
0.0553542	26	137	1.74	PW:0000144 ubiquitin/proteasome degradation pathway	ftp://ftp.rgd.mcw.edu/pub/data_release	SAE1 UBE4B CDC20 PSMC6 TRIM32 PSMD4 UBE2C ELOB FANCL UBA6 CUL4A PPIL2 UBA1 DDB1 RAPSN CBL CUL3 PSMD1 PSME3 TRIM37 CUL5 ANAPC2 UBE2K SIAH1 UBE2B PSMC4
0.0554834	30	165	1.66699	DOID:9000217 Stomach Neoplasms	ftp://ftp.rgd.mcw.edu/pub/data_release	COPS7A CDKN1A PTOV1 SERBP1 NT5E FILIP1 EEF1A1 RPS6 SELENBP1 DPYD DLC1 PGAM1 DDB1 ARFGAP2 DNMT1 NDUFA2 CTSC NPM1 PHB KMT2C BLVRB RHOA ATM GMPR NOP56 NAXD ING1 BCL2L1 PLIN2 RPL15
0.0554834	19	90	1.93556	Positive regulation of cellular amide metabolic process	http://amigo.geneontology.org/amigo/term/GO:0034250	LARP6 EIF3E CCN1 CLU VIM RELA ELAVL1 NIBAN1 FASTKD2 NPM1 EIF6 KHDRBS1 RPS27L UPF3A IL20RB YTHDF2 RPL26 EIF5A YTHDF1
0.0554834	19	90	1.93556	Telomere maintenance	http://amigo.geneontology.org/amigo/term/GO:0000723	XRCC6 HSP90AB1 HSP90AA1 RPA2 MAP3K4 TCP1 RAD51 TERF1 CCT3 DCLRE1B ERCC4 CCT7 CCT4 DNA2 HNRNPU DKC1 MAP2K7 ATM SMG1
0.0556482	29	158	1.68282	Nucleoside phosphate biosynthetic process	http://amigo.geneontology.org/amigo/term/GO:1901293	ATP5F1B ACOT7 CTPS1 ATP5F1A EEF1D ACSS1 PANK2 PAICS ADK QRICH1 ATP6V1A GUK1 ATP5MC1 NME2 AMPD3 ATP5ME PDHB PPCDC AK2 ATP5PD ALDOA ATP5MF ATP5F1C HPRT1 PID1 ATP5F1D ATP5PB STOML2 TYMS
0.0556702	6	15	3.66738	Structural constituent of eye lens	http://amigo.geneontology.org/amigo/term/GO:0005212	CRYBB3 CRYBB2 VIM HSPB6 CRYAB CRYBA4
0.0556702	6	15	3.66738	Pre-mRNA binding	http://amigo.geneontology.org/amigo/term/GO:0036002	EP300 HNRNPU TARDBP TRA2B DDX5 U2AF2
0.0556702	6	15	3.66738	DOID:0050424 familial adenomatous polyposis	ftp://ftp.rgd.mcw.edu/pub/data_release	HDAC2 SCG5 ITIH4 REEP5 SRP19 AKT1
0.0556702	6	15	3.66738	MRNA cis splicing, via spliceosome	http://amigo.geneontology.org/amigo/term/GO:0045292	PRPF4B SNRPC PSIP1 DCPS SRSF1 NCBP2
0.0556702	6	15	3.66738	Cellular response to vitamin	http://amigo.geneontology.org/amigo/term/GO:0071295	POSTN MN1 FOLR2 DCPS SNW1 KANK2
0.0556702	6	15	3.66738	Extracellular exosome biogenesis	http://amigo.geneontology.org/amigo/term/GO:0097734	VPS4B COPS5 SDCBP RAB7A ATP13A2 HGS
0.0561356	78	529	1.35187	Embryo development ending in birth or egg hatching	http://amigo.geneontology.org/amigo/term/GO:0009792	EP300 ACVRL1 RARG YBX3 CECR2 RUNX2 SIN3A CCNB1IP1 ITPK1 GSC CEBPA GPI ARHGAP35 GRHL3 PNLDC1 MTHFD1L CITED2 MYO1E COPS2 TJP1 BMP4 ANKS6 SULF1 PHGDH COL11A1 CCN1 POLB PSPH IFT140 PKD1 SEMA4C CUL4A MYO18B SMARCB1 SEC24C NOLC1 SH3PXD2A SKIL MED12 PRKCSH NDUFA2 TCOF1 ACVR1 FZD5 CUL3 HOXA5 ISL1 GRB2 AXIN2 TANC2 FKBP10 HOXB4 GGNBP2 COPS3 TAPT1 CHTOP ATM DVL2 DLL1 YBX1 NXN YAP1 DACT1 XRCC2 BPTF HOXC9 GIN…
0.0564356	16	71	2.06613	Positive regulation of translation	http://amigo.geneontology.org/amigo/term/GO:0045727	LARP6 EIF3E VIM ELAVL1 NIBAN1 FASTKD2 NPM1 EIF6 KHDRBS1 RPS27L UPF3A IL20RB YTHDF2 RPL26 EIF5A YTHDF1
0.0570297	11	41	2.45983	Structural constituent of cytoskeleton	http://amigo.geneontology.org/amigo/term/GO:0005200	TUBA1A TUBB ACTB ARPC1B ARPC3 INA VIM ARPC4 ARPC5 ACTR3 GFAP
0.0570297	11	41	2.45983	Protein localization to endoplasmic reticulum	http://amigo.geneontology.org/amigo/term/GO:0070972	KDELR1 ANKRD13C DDRGK1 RYR2 SRPRA SRP68 SRP19 SEC62 SSR3 OS9 HERPUD1
0.0570619	109	778	1.28453	Epithelium development	http://amigo.geneontology.org/amigo/term/GO:0060429	EP300 ACVRL1 KRT84 RARG PTPRO CECR2 PKHD1 TGM1 ARG2 CCDC88C ITPK1 GSC ATP2C2 E2F4 ARHGAP35 PIK3CD PDPN GRHL3 MTHFD1L CITED2 CD109 MYO1E SERPINB5 BMP4 ANXA1 TNC RSPO2 SULF1 PHGDH CNN3 CCN1 FERMT1 ACTB IFT140 PKD1 SEMA4C ATOH8 SLIT2 SPRY2 RYR2 ACTA2 BCCIP VIM RYK WWTR1 SKIL MED12 GPC3 CPT1A LRP5 PPP1CA RELA C3 ICAM1 CDHR2 VDAC1 DEUP1 NPHS2 CSMD1 NRG1 ACVR1 FZD5 SERPINE2 HOXA5 ADAMTS12 IL6ST GRB2 SL…
0.0573531	9	30	2.75054	General transcription initiation factor binding	http://amigo.geneontology.org/amigo/term/GO:0140296	RUVBL2 GTF2B ERCC4 HNRNPU CAND2 YEATS2 TAF13 DR1 FBL
0.0573531	9	30	2.75054	DOID:2256 osteochondrodysplasia	ftp://ftp.rgd.mcw.edu/pub/data_release	COL11A2 VEGFA HSPG2 TRPS1 COL11A1 MATN3 FLNB FLNA ATF2
0.0573531	9	30	2.75054	PW:0001041 pathogenic Escherichia coli infection pathway	ftp://ftp.rgd.mcw.edu/pub/data_release	YWHAZ ACTB ARPC1B YWHAQ ARPC4 HCLS1 RHOA IL20RB WAS
0.0573531	9	30	2.75054	Spliceosomal snRNP assembly	http://amigo.geneontology.org/amigo/term/GO:0000387	SNRPF SNRPC SART3 SNRPD3 CLNS1A SNRPE SNRPG SNRPD2 LSM2
0.0574184	20	97	1.8904	DOID:305 carcinoma	ftp://ftp.rgd.mcw.edu/pub/data_release	HNRNPA1 CDKN1A EEF1A1 TRPS1 YWHAZ CNN3 ACTB RAN PGAM1 DNMT1 RASGRF2 SLC12A2 ACKR3 IL6ST PHB RHOA URI1 STMN1 PLAUR BCL2L1
0.0574184	20	97	1.8904	Gene silencing	http://amigo.geneontology.org/amigo/term/GO:0016458	PPHLN1 RIPK1 BMP4 PUM2 NCOR2 FXR1 PHF8 ELAVL1 DNMT1 TPR SND1 STAT3 EIF6 CHMP1A H3F3B SMCHD1 CLP1 DDX5 TRIM28 TNRC6A
0.0577119	18	84	1.96467	Global Genome Nucleotide Excision Repair (GG-NER)	https://reactome.org/download/current	COPS7A UBE2N RPA2 COPS2 INO80 POLE3 COPS5 ACTB ERCC4 CUL4A ACTR8 XPC DDB1 GTF2H1 SUMO2 COPS3 UBE2V2 RBX1
0.0577119	18	84	1.96467	Negative regulation of protein-containing complex assembly	http://amigo.geneontology.org/amigo/term/GO:0031333	EP300 TMOD2 TMOD4 SLIT2 CLU HIP1R SAMD8 DKK1 LMOD2 CARMIL2 TRAF3IP1 STMN1 SSH3 CAPZA2 DACT1 PMEPA1 CRYAB GSN
0.0577119	15	65	2.1158	Cell-substrate junction organization	http://amigo.geneontology.org/amigo/term/GO:0150115	ACVRL1 RCC2 MAPRE2 DLC1 THSD1 CORO1C ACTN2 HRG ARHGAP6 LAMC1 ITGB4 PHLDB2 TNS1 RAC1 PLEC
0.0580493	4	7	5.23912	DNA unwinding involved in DNA replication	http://amigo.geneontology.org/amigo/term/GO:0006268	RAD51 MCM2 SSBP1 TWNK
0.0580493	4	7	5.23912	Swr1 complex	http://amigo.geneontology.org/amigo/term/GO:0000812	RUVBL2 BRD8 ING3 EP400
0.0580493	4	7	5.23912	Regulation of cellular amino acid metabolic process	http://amigo.geneontology.org/amigo/term/GO:0006521	PARK7 ATCAY INS CLN3
0.0580493	4	7	5.23912	Proton-transporting ATP synthase complex, catalytic core F(1)	http://amigo.geneontology.org/amigo/term/GO:0045261	ATP5F1B ATP5F1A ATP5F1C ATP5F1D
0.0580493	4	7	5.23912	L-serine metabolic process	http://amigo.geneontology.org/amigo/term/GO:0006563	PHGDH PSPH SDS SHMT2
0.0580493	12	47	2.34088	Telomere maintenance via telomerase	http://amigo.geneontology.org/amigo/term/GO:0007004	HSP90AB1 HSP90AA1 MAP3K4 TCP1 TERF1 CCT3 CCT7 CCT4 HNRNPU DKC1 MAP2K7 ATM
0.0580493	4	7	5.23912	Regulation of cytoskeletal remodeling and cell spreading by IPP complex components	https://reactome.org/download/current	PARVB LIMS1 ARHGEF6 PXN
0.0580493	4	7	5.23912	Chaperone Mediated Autophagy	https://reactome.org/download/current	HSP90AB1 EEF1A1 GFAP PLIN2
0.0580493	4	7	5.23912	DOID:0070157 hereditary sensory and autonomic neuropathy type 1C	ftp://ftp.rgd.mcw.edu/pub/data_release	GSTZ1 VIPAS39 AHSA1 NOXRED1
0.0580493	12	47	2.34088	Response to heat	http://amigo.geneontology.org/amigo/term/GO:0009408	HSP90AB1 DNAJA2 PSIP1 CASQ1 CRNN BAG3 EIF2B5 RBBP7 MAP2K7 CHORDC1 TPR HMOX1
0.0580493	36	209	1.57926	Response to virus	http://amigo.geneontology.org/amigo/term/GO:0009615	USP15 TRIM15 SIN3A NPC2 HSP90AA1 LSM14A AGBL5 PUM2 ELMOD2 CLU OASL UFD1 ACTA2 IRF7 EEF1G TKFC RNF26 IRF2 ZC3HAV1 IRF5 PHB RNF216 RRP1B TRAF3IP1 URI1 STMN1 BATF3 IFI44L ZMPSTE24 HNRNPUL1 C1QBP BCL2L1 G3BP1 RPS15A NLRC5 TPT1
0.0580493	4	7	5.23912	Plasma membrane raft organization	http://amigo.geneontology.org/amigo/term/GO:0044857	PACSIN2 FLOT1 CLN3 CAV3
0.0580805	39	231	1.54792	Endocytosis	http://www.genome.jp/kegg-bin/show_pathway?ssc04144	IGF2R VTA1 SNX3 SPG21 VPS4B ARFGEF2 ARPC1B GRK4 ARPC3 VPS26A KIF5B ARPC4 RAB7A IL2RG ARFGAP2 RUFY1 FOLR2 ARAP1 CBL ARPC5 ACTR3 STAM2 CHMP6 CYTH1 EHD4 RHOA CLTC CHMP1A VPS35 CAPZA2 VPS37B HGS VPS36 RBSN MVB12B RAB5A EPN2 CAV3 SNX6
0.0580805	44	268	1.50527	Regulation of protein catabolic process	http://amigo.geneontology.org/amigo/term/GO:0042176	GPLD1 HSP90AB1 HSP90AA1 PARK7 SNX3 TRIM32 SDCBP DDRGK1 PKD1 CLU RAB7A OGT GPC3 RELA DDB1 SGTA MDM4 DTL C4BPB SERPINE2 PSMD1 RNF180 CHMP6 SUMO2 GFAP PSME3 PHB UBQLN1 VPS35 ATP5IF1 RACK1 ATP13A2 DACT1 FLNA UBE2K GPX1 INS PDCL3 RBX1 PSME3IP1 LRIG2 PIN1 NKD1 HERPUD1
0.0580805	39	231	1.54792	Proteasome-mediated ubiquitin-dependent protein catabolic process	http://amigo.geneontology.org/amigo/term/GO:0043161	HSP90AB1 FBXO9 FBXO31 AMFR PARK7 UBE4B CDC20 PSMC6 SDCBP DDRGK1 UBE2C CUL4A CLU WWTR1 OGT DDB1 SGTA KLHL20 EDEM3 DNAJC10 CUL3 RNF180 SUMO2 SPOP UBQLN1 RNF216 KLHL15 RACK1 LTN1 WFS1 UBE2K RBX1 ANAPC11 OS9 PCNP SEC61B UBE2B HERPUD1 DDIT3
0.0581969	67	444	1.38353	DOID:4852 pleomorphic xanthoastrocytoma	ftp://ftp.rgd.mcw.edu/pub/data_release	ARPC1B TFR2 POP7 COL26A1 GTF2I PSPH STX1A MTERF1 AKAP9 ELAPOR2 GRM3 PMPCB ORC5 ATXN7L1 SYPL1 LAMB1 VSTM2A UBN2 ZC3HAV1 CALD1 EXOC4 CHCHD3 MKLN1 CEP41 CPA5 TMEM209 AHCYL2 IRF5 SND1 LMOD2 ASB15 AASS ING3 CTTNBP2 FOXP2 PPP1R3A KIAA0895 SEPTIN7 ITPRID1 SKAP2 STK31 DBNL LSM8 MDFIC VPS50 AVL9 MEPCE LANCL2 MACC1 GALNT17 KLHDC10 MAGI2 PURB VOPP1 DLX6 PDAP1 CRHR2 TAF6 GCC1 HNRNPA2B1 IGF2BP3 NDUFA5 IKZF1 F…
0.0582248	53	336	1.44622	Protein localization to membrane	http://amigo.geneontology.org/amigo/term/GO:0072657	MMP14 AKAP5 GPHN HSP90AA1 ATP2C2 PDCD5 CAPN3 FRMPD1 ACTB PPIL2 ACTN2 LGI1 KIF5B GRIP2 RAB7A NLGN1 STX3 SGTA TIMM29 SQSTM1 SRPRA GORASP2 ACSL3 AGK SRP68 SLC9A3R1 STAC2 ITGA3 RAB34 MESD CLTC FLOT1 OPTN ARHGEF16 SRP19 VPS35 EMC7 COLQ SEC62 GRIN3B RACK1 SSR3 HGS FLNA INS BAG4 PID1 BCL2L1 CLN3 STOM CEMIP PALM CAV3
0.0582592	26	138	1.72739	Ubiquitin mediated proteolysis	http://www.genome.jp/kegg-bin/show_pathway?ssc04120	UBE2N SAE1 UBE4B CDC20 TRIM32 UBE2W UBE2C ELOB FANCL UBA6 CUL4A PPIL2 UBA1 DDB1 ANAPC15 CBL CUL3 CDC16 TRIM37 CUL5 ANAPC2 UBE2K RBX1 ANAPC11 SIAH1 UBE2B
0.0582592	13	53	2.24887	Viral gene expression	http://amigo.geneontology.org/amigo/term/GO:0019080	EP300 TRIM32 GTF2B DENR SMARCB1 RAPSN SMARCA4 RRP1B MDFIC NUCKS1 SNW1 TARDBP TRIM14
0.0582592	13	53	2.24887	Ribonucleoprotein complex localization	http://amigo.geneontology.org/amigo/term/GO:0071166	NUP107 SRSF3 RAN RBM15B THOC2 DDX39A AKAP8L TPR NPM1 CHTOP LOC110257686 IWS1 HNRNPA2B1
0.058606	8	25	2.93391	U4/U6 x U5 tri-snRNP complex	http://amigo.geneontology.org/amigo/term/GO:0046540	LSM7 EFTUD2 LSM8 SNRPE SNRPG USP39 SNRPD2 LSM2
0.058606	8	25	2.93391	Spliceosomal tri-snRNP complex	http://amigo.geneontology.org/amigo/term/GO:0097526	LSM7 EFTUD2 LSM8 SNRPE SNRPG USP39 SNRPD2 LSM2
0.058606	8	25	2.93391	Aminopeptidase activity	http://amigo.geneontology.org/amigo/term/GO:0004177	MMP14 NPEPL1 XPNPEP2 ERAP1 DNPEP LAP3 METAP2 RNPEP
0.058606	7	20	3.20896	DOID:9007925 Sudden Death Cardiac	ftp://ftp.rgd.mcw.edu/pub/data_release	LMNA RYR2 NEBL AKAP9 ACSL3 TRPM4 DSG2
0.058606	8	25	2.93391	DOID:9008691 Liver Injury	ftp://ftp.rgd.mcw.edu/pub/data_release	CYP1A2 JAK2 ACTA2 GSR TFPI NPM1 G6PD GCLM
0.058606	7	20	3.20896	Regulation of fibroblast migration	http://amigo.geneontology.org/amigo/term/GO:0010762	RCC2 DDR2 CORO1C PRR5L BAG4 RAC1 CLN3
0.058606	7	20	3.20896	Positive regulation of G2/M transition of mitotic cell cycle	http://amigo.geneontology.org/amigo/term/GO:0010971	SIN3A RCC2 VPS4B DTL CDK4 MECP2 DBF4B
0.058606	7	20	3.20896	PW:0001406 SWI/SNF family mediated chromatin remodeling pathway	ftp://ftp.rgd.mcw.edu/pub/data_release	ARID1B ACTB SMARCB1 SMARCA4 PHF10 BRD9 PBRM1
0.058606	8	25	2.93391	PW:0000738 fatty acid beta degradation pathway	ftp://ftp.rgd.mcw.edu/pub/data_release	ABCD2 ETFB ACSS1 PEX13 ETFDH ACADS HSD17B10 ACSL3
0.058606	8	25	2.93391	Modulation by host of viral process	http://amigo.geneontology.org/amigo/term/GO:0044788	IGF2R PC RAPSN PHB NUCKS1 TBC1D20 STOM APCS
0.058606	8	25	2.93391	Sarcomere organization	http://amigo.geneontology.org/amigo/term/GO:0045214	CFL2 TPM1 CAPN3 CASQ1 ACTN2 LMOD2 WDR1 CAV3
0.058606	7	20	3.20896	Cellular response to gamma radiation	http://amigo.geneontology.org/amigo/term/GO:0071480	XRCC6 CDKN1A TMEM109 RPL26 YAP1 BCL2L1 CRYAB
0.058606	7	20	3.20896	Regulation of vascular endothelial growth factor signaling pathway	http://amigo.geneontology.org/amigo/term/GO:1900746	SMOC2 CCBE1 SPRY2 JCAD HRG ADGRA2 DLL1
0.058606	7	20	3.20896	Negative regulation of extrinsic apoptotic signaling pathway via death domain receptors	http://amigo.geneontology.org/amigo/term/GO:1902042	PARK7 ICAM1 SERPINE1 PEA15 GPX1 BCL2L1 HMOX1
0.058606	8	25	2.93391	Regulation of viral release from host cell	http://amigo.geneontology.org/amigo/term/GO:1902186	TRIM26 TRIM15 VPS4B TRIM32 PC DDB1 VPS37B TRIM28
0.0594499	40	239	1.53447	Synapse organization	http://amigo.geneontology.org/amigo/term/GO:0050808	PTPRO AMIGO2 TUBB GPHN LGMN WASF2 ADGRL2 CDC20 GJA10 LRFN5 TNC YWHAZ IGSF9 BCAN ACTB SEMA4D BSN NLGN1 IL1RAPL1 SRPX2 SLC9A6 SLITRK2 C3 ALS2 DBNL BAIAP2 ITGA3 NTN1 MESD RHOA VPS35 COLQ GABRA2 ANAPC2 GABRB2 INS SNAPIN MECP2 CLN3 PALM
0.0595823	37	217	1.56329	Tissue migration	http://amigo.geneontology.org/amigo/term/GO:0090130	ACVRL1 GPLD1 LGMN CDH13 GPI PIK3CD MAPRE2 SMOC2 ATP5F1A CCBE1 BMP4 ANXA1 FERMT1 ATOH8 SLIT2 CORO1C JCAD HRG SRPX2 CALR PKN1 ANGPT2 ADGRA2 RHOA CLEC14A PBLD PTPN11 GLIPR2 SASH1 GPX1 MECP2 RAC1 FGF8 ARSB KANK2 HMOX1 APOH
0.0597891	50	314	1.45995	GTP binding	http://amigo.geneontology.org/amigo/term/GO:0005525	TUBA1A TMEM19 CRACR2A TUBB ARHGAP5 ARHGAP35 HBS1L EEF1A1 RAB14 RHOC GNAT2 TUFM ARL9 SEPTIN11 RAN RHOF DRG1 GNAZ RAB7A GSPT2 KLC2 SEPTIN8 SAR1B SRPRA OLA1 SEPTIN7 SEPTIN9 EFTUD2 RAB34 EHD4 RHOA TGM2 RIT1 GFM1 IFI44L MTG1 EIF2S3 IRGQ LOC102161784 RASD2 GNL2 GIMAP7 RAB40C RAC1 RABL3 MFHAS1 RRAD RAB5A RASL12 RALA
0.0600051	5	11	4.16748	Regulation of exosomal secretion	http://amigo.geneontology.org/amigo/term/GO:1903541	VPS4B SDCBP RAB7A ATP13A2 HGS
0.0600051	5	11	4.16748	Positive regulation of protein localization to chromosome, telomeric region	http://amigo.geneontology.org/amigo/term/GO:1904816	TCP1 CCT3 CCT7 CCT4 DKC1
0.0600051	5	11	4.16748	DOID:231 motor neuron disease	ftp://ftp.rgd.mcw.edu/pub/data_release	NEK1 VIM TARDBP OPTN AIF1
0.0600051	5	11	4.16748	Anaphase-promoting complex-dependent catabolic process	http://amigo.geneontology.org/amigo/term/GO:0031145	FBXO31 CDC20 UBE2C CUL3 ANAPC11
0.0600051	5	11	4.16748	Negative regulation of pathway-restricted SMAD protein phosphorylation	http://amigo.geneontology.org/amigo/term/GO:0060394	EMILIN1 DKK1 SNX25 PBLD PMEPA1
0.0600689	32	181	1.62094	Energy derivation by oxidation of organic compounds	http://amigo.geneontology.org/amigo/term/GO:0015980	DYRK2 CYP1A2 DLST PARK7 ACADM ATP5F1A PANK2 TRAP1 PPP1CB IDE NDUFB6 UQCRC1 CAVIN3 IL6ST NDUFS6 SDHA RHOA ISCU COX5A COQ9 MDH1 FH EPM2AIP1 NDUFS3 IDH3A INS ATP5F1C ATP5F1D SHMT2 ATP5PB NDUFA5 STOML2
0.0600689	23	118	1.78707	Actin filament polymerization	http://amigo.geneontology.org/amigo/term/GO:0030041	TMOD2 TMOD4 DNAI3 ARPC1B SLIT2 HIP1R ARPC3 ARPC4 HCLS1 ARPC5 ACTR3 LMOD2 GRB2 CARMIL2 IL20RB GMFB SSH3 CAPZA2 AIF1 BAG4 VASP WAS GSN
0.0600689	23	118	1.78707	Cell cycle G1/S phase transition	http://amigo.geneontology.org/amigo/term/GO:0044843	CDKN1A FBXO31 E2F4 RPA2 INO80 RPS6 ANXA1 MTBP CRNN PKD1 SPDYA CUL4A MN1 PHF8 ACVR1 RPS27L MEPCE CDK4 RPL26 CTDSP2 DACT1 AIF1 KANK2
0.0600689	110	789	1.27824	Cellular response to endogenous stimulus	http://amigo.geneontology.org/amigo/term/GO:0071495	EP300 DDX17 ACVRL1 USP15 GPLD1 HSP90AB1 RUNX2 LGMN PDCD5 PARK7 GAREM1 LEPROT SMOC2 CITED2 CCN2 CD109 RNF165 RAD51 BMP4 JAK2 ANXA1 RAB14 CA2 SULF1 SDCBP RXRG CCN1 FERMT1 DDRGK1 NCOA5 ACTB ARID5A CRIM1 EMILIN1 SLIT2 USO1 LRIT3 SPRY2 NCOR2 YWHAH KLHL22 RYR2 ACTN2 HNRNPU VIM PIP4K2A UBA5 SKIL OGT GPC3 RELA SMARCA4 ICAM1 DNMT1 CALR AKAP8 CRHBP FBN2 BRD8 CAMK2A LAMTOR1 FOLR2 AKAP9 ELAPOR2 SNX25 ACVR1 T…
0.0605947	51	322	1.45215	Guanyl ribonucleotide binding	http://amigo.geneontology.org/amigo/term/GO:0032561	TUBA1A TMEM19 CRACR2A TUBB ARHGAP5 ARHGAP35 HBS1L EEF1A1 RAB14 RHOC GNAT2 TUFM ARL9 SEPTIN11 RAN RHOF DRG1 GNAZ PRKG1 RAB7A GSPT2 KLC2 SEPTIN8 SAR1B SRPRA OLA1 SEPTIN7 SEPTIN9 EFTUD2 RAB34 EHD4 RHOA TGM2 RIT1 GFM1 IFI44L MTG1 EIF2S3 IRGQ LOC102161784 RASD2 GNL2 GIMAP7 RAB40C RAC1 RABL3 MFHAS1 RRAD RAB5A RASL12 RALA
0.0605947	51	322	1.45215	Organophosphate biosynthetic process	http://amigo.geneontology.org/amigo/term/GO:0090407	ATP5F1B MOCS1 GPHN ACOT7 PIK3CD CTPS1 ATP5F1A EEF1D ACSS1 PANK2 PAICS ADK PIP4K2A ABHD5 QRICH1 TAMM41 ATP6V1A DGKZ GUK1 AVPR1B ACSL3 HTR2B ORMDL3 ATP5MC1 NME2 PEMT PIGT AMPD3 ATP5ME IMPA2 G6PD PDHB PIGS PPCDC SELENOI AK2 ATP5PD SMG1 ALDOA BPNT2 ATP5MF ATP5F1C HPRT1 PID1 ATP5F1D CLN3 PTDSS2 ATP5PB PCYT2 STOML2 TYMS
0.0606856	16	72	2.03744	Negative regulation of intrinsic apoptotic signaling pathway	http://amigo.geneontology.org/amigo/term/GO:2001243	YBX3 PARK7 TXNDC12 TRIM32 CLU SAMD8 ACKR3 URI1 XBP1 NDUFS3 PLAUR TMEM161A GPX1 BCL2L1 HERPUD1 TPT1
0.0606856	16	72	2.03744	Translational initiation	http://amigo.geneontology.org/amigo/term/GO:0006413	EIF3K EIF3E DENR EIF2A EIF2B5 EIF4G2 EIF4E1B TPR NPM1 KHDRBS1 IL20RB NCBP2 YTHDF2 EIF2S1 EIF5 YTHDF1
0.0606856	24	125	1.76034	Transport vesicle	http://amigo.geneontology.org/amigo/term/GO:0030133	CPLX3 AP1G1 IGF2R SPG21 COPS5 SYPL2 SEC23B STX1A SEMA4C LAMP1 SEC24C CDK16 TMED9 ICA1 SYPL1 CLTC SYN2 GABRA2 ATP13A2 SYNGR2 SNAPIN CLN3 PPT1 BLOC1S6
0.0606856	10	36	2.54679	EPHB-mediated forward signaling	https://reactome.org/download/current	SDC2 ACTB ARPC1B ARPC3 ARPC4 ARPC5 ACTR3 RHOA ARHGEF28 RAC1
0.0606856	10	36	2.54679	Organelle localization by membrane tethering	http://amigo.geneontology.org/amigo/term/GO:0140056	ESYT1 STX1A SNAP29 CTBP2 STX3 STXBP2 EXOC4 NDRG4 PPFIA3 CLN3
0.0606922	20	98	1.87111	Negative regulation of translation	http://amigo.geneontology.org/amigo/term/GO:0017148	LSM14A PNLDC1 EXOSC3 RIDA SAMD4B CALR RPS3 DCPS TPR STAT3 DCP1A EIF6 TARDBP IGF2BP1 TIA1 YTHDF2 EIF2S1 TNRC6A YTHDF1 TYMS
0.0607377	41	247	1.52189	Tubulin binding	http://amigo.geneontology.org/amigo/term/GO:0015631	MDM1 GAS8 PDCD5 ATF5 KIF1B RCC2 KIF17 MTCL1 MAPRE2 INO80 NDN POLB VAPB LRPPRC SPAST AGBL5 DPYSL5 FHDC1 HSPH1 DRG1 BLOC1S2 KIF5B RGS14 TBCA RPS3 CEP295 CACYBP TPR CENPF ZNF207 TAOK1 KIF21B TRAF3IP1 MTUS2 STMN1 CAMSAP2 MAPRE3 FAM110C NDE1 CAV3 RP1
0.0607835	30	167	1.64703	Negative regulation of cellular catabolic process	http://amigo.geneontology.org/amigo/term/GO:0031330	HSP90AB1 DHX34 PARK7 SDCBP DDRGK1 LRPPRC HNRNPU OGT DKC1 EIF4G2 SGTA ELAVL1 ANGEL2 HTR2B AXIN2 MEIOC STAT3 PHF23 TIRAP TARDBP IGF2BP1 KDM4A SECISBP2 YBX1 THRAP3 INS PDCL3 PSME3IP1 LRIG2 HMOX1
0.0608769	118	855	1.26535	Response to endogenous stimulus	http://amigo.geneontology.org/amigo/term/GO:0009719	EP300 DDX17 ACVRL1 USP15 GPLD1 HSP90AB1 RUNX2 ACSBG1 LGMN CDH13 PDCD5 PARK7 GAREM1 LEPROT SMOC2 CITED2 CCN2 CD109 RNF165 RAD51 BMP4 JAK2 ANXA1 RAB14 CA2 SULF1 SDCBP RXRG CCN1 FERMT1 DDRGK1 NCOA5 ACTB ARID5A CRIM1 EMILIN1 SLIT2 USO1 LRIT3 SPRY2 NCOR2 YWHAH KLHL22 RYR2 ACTN2 HNRNPU VIM PIP4K2A UBA5 SKIL HCLS1 OGT GPC3 RELA SMARCA4 ICAM1 DNMT1 CALR AKAP8 CRHBP FBN2 BRD8 CAMK2A LAMTOR1 FOLR2 AKAP9 EL…
0.0613823	52	330	1.44473	Angiogenesis	http://amigo.geneontology.org/amigo/term/GO:0001525	ACVRL1 GPLD1 CDH13 WASF2 SMOC2 CCN2 TJP1 CCBE1 BMP4 ANXA1 YWHAZ SULF1 CCN1 PANK2 GTF2I EMILIN1 SLIT2 SPRY2 JCAD STAB1 HRG SRPX2 C3 ANGPT2 ADGRA2 ACVR1 FZD5 ACKR3 HOXA5 ISL1 STAT3 SERPINF1 RHOA HSPB6 CLEC14A SERPINE1 DLL1 XBP1 HGS SASH1 GPX1 PDCL3 MECP2 MYDGF JMJD6 FGF8 ATF2 MEIS1 FOXJ2 HMOX1 EPN2 APOH
0.0613839	18	85	1.94156	Steroid hormone mediated signaling pathway	http://amigo.geneontology.org/amigo/term/GO:0043401	EP300 DDX17 PARK7 BMP4 RXRG DDRGK1 NCOR2 YWHAH UBA5 SMARCA4 CALR PHB WBP2 RHOA POU4F2 YAP1 DDX5 KANK2
0.0613839	18	85	1.94156	Vesicle localization	http://amigo.geneontology.org/amigo/term/GO:0051648	MYO1A USO1 AP3M1 BLOC1S2 CCDC186 WDR11 KIF5B RAB7A NLGN1 TMED9 CUL3 EXOC4 CDH3 SYN2 SNAPIN CLN3 BLOC1S6 NDE1
0.0614411	74	501	1.35422	Vasculature development	http://amigo.geneontology.org/amigo/term/GO:0001944	ACVRL1 GPLD1 CDH13 WASF2 CTH SMOC2 CITED2 CCN2 MYO1E TJP1 CCBE1 BMP4 ANXA1 YWHAZ SULF1 CCN1 PANK2 GTF2I PKD1 ANTXR1 EMILIN1 SLIT2 SPRY2 MYO18B ACTA2 JCAD STAB1 HRG MYLK SRPX2 GPC3 LRP5 C3 DNMT1 FZD4 PTPN14 ANGPT2 ADGRA2 ACVR1 FZD5 ACKR3 HOXA5 ISL1 STAT3 FKBP10 GGNBP2 SERPINF1 RHOA HSPB6 CLEC14A SNX17 SERPINE1 DLL1 PLA2G15 XBP1 YAP1 HGS SASH1 GPX1 PDCL3 MECP2 MYDGF JMJD6 FGF8 ATF2 MEIS1 FOXJ2 HMOX…
0.0624769	37	218	1.55612	DOID:9008443 Colorectal Neoplasms	ftp://ftp.rgd.mcw.edu/pub/data_release	EP300 HNRNPA1 ABCD2 CYP1A2 CABLES1 CD109 SCG5 SERPINB5 BMP4 SELENBP1 DPYD ABCA4 DLC1 POSTN EXO1 DNMT1 SFXN1 FBN2 AKAP9 ACKR3 IL6ST AXIN2 ABCC3 ERBB3 MSH6 RHOA FEN1 NXN PTPN11 YAP1 DACT1 TRIM28 PPP1R14A ABCD4 PPM1E AKT1 CBX5
0.0624769	21	105	1.83369	Hormone-mediated signaling pathway	http://amigo.geneontology.org/amigo/term/GO:0009755	EP300 DDX17 PARK7 BMP4 RXRG DDRGK1 NCOR2 YWHAH UBA5 SMARCA4 CALR CRHBP PHB WBP2 RHOA LANCL2 POU4F2 PTPN11 YAP1 DDX5 KANK2
0.0629103	44	270	1.49412	Transmembrane receptor protein serine/threonine kinase signaling pathway	http://amigo.geneontology.org/amigo/term/GO:0007178	EP300 ACVRL1 USP15 HSP90AB1 RUNX2 HEXA CITED2 CD109 RNF165 BMP4 JAK2 SULF1 SDCBP CCN1 FERMT1 ATOH8 CRIM1 EMILIN1 SPRY2 DKK1 VIM WWTR1 SKIL IGSF1 GPC3 FBN2 ELAPOR2 SNX25 ACVR1 ITGA3 ZEB2 SNW1 ILK NRROS PBLD DDX5 PMEPA1 GDF15 FAM89B RBM4 PIN1 CAV3 LRP2 SNX6
0.0634084	57	369	1.41627	Muscle structure development	http://amigo.geneontology.org/amigo/term/GO:0061061	EP300 DDX17 YBX3 CFL2 GSC ACADM CTH CITED2 RNF165 TPM1 COPS2 CAPN3 BMP4 TRIM32 CASQ1 LMNA SYPL2 COL11A1 MYLK2 SEMA4C RYR2 ACTN2 DKK1 MYOF HIF1AN HNRNPU NEBL FXR1 MYLK DNMT1 BCL9L NRG1 ACVR1 LMOD2 NLN ISL1 ERBB3 RHOA CDON FLOT1 H3F3B DLL1 YBX1 PLA2G15 GPX1 GDF15 MECP2 FGF8 WDR1 CRYAB ID3 MYL2 CAV3 LRP2 TNNI3 COL19A1 DDIT3
0.063473	54	346	1.43092	Nucleobase-containing small molecule metabolic process	http://amigo.geneontology.org/amigo/term/GO:0055086	EP300 ATP5F1B GPI ACOT7 PARK7 CTPS1 NT5E ATP5F1A MTAP DPYS DPYD EEF1D ACSS1 PANK2 PAICS RAN HK1 ADK PGAM1 OXSM QRICH1 ACP3 ATP6V1A OGT MACROD1 GUK1 GALK1 STAT3 ATP5MC1 NME2 ACACA PIPOX CDA AMPD3 EIF6 ATP5ME SLC2A6 PDHB GMPR PPCDC UGDH AK2 ATP5PD ALDOA INS ATP5MF ATP5F1C HPRT1 PID1 ATP5F1D MCEE ATP5PB STOML2 TYMS
0.063473	54	346	1.43092	Regulation of plasma membrane bounded cell projection organization	http://amigo.geneontology.org/amigo/term/GO:0120035	EP300 MAK SIPA1L1 ARHGAP35 DRAXIN PDPN RCC2 WASF2 TOX CRABP2 IFT140 SLIT2 STK24 SEMA4D CORO1C YWHAH VIM RYK NLGN1 HRG CDHR5 PRKCSH ICAM1 CDHR2 ARAP1 ACTR3 TBR1 STK25 MYO10 SEPTIN9 CDC42EP4 GFAP NTN1 TAPT1 RHOA CARMIL2 CRMP1 IL20RB POU4F2 VPS35 CAMSAP2 YAP1 PTK6 INS SNAPIN LRIG2 RAC1 SS18L1 CLN3 WAS RAB5A PALM RP1 RALA
0.0635677	11	42	2.40126	Histone deacetylase complex	http://amigo.geneontology.org/amigo/term/GO:0000118	SIN3A RUVBL2 HDAC2 MECOM RBBP7 BRD8 ING3 NRIP1 CHD3 EP400 CBX5
0.0635677	36	211	1.56429	Macromolecule methylation	http://amigo.geneontology.org/amigo/term/GO:0043414	JARID2 PHF1 RPL22 WTAP VIRMA LMNA CAMKMT DPY30 SMARCB1 SUV39H2 DALRD3 RBM15B WDR82 MORC1 PAXBP1 HSD17B10 OGT TRMT112 PRMT3 DOT1L CARM1 DNMT1 ETF1 GCG KMT2C CHTOP SNW1 MEPCE CTCF WDR5 KDM4A FBL TRMT61A MECP2 IWS1 TRIM28
0.0635677	66	439	1.3784	Regulation of kinase activity	http://amigo.geneontology.org/amigo/term/GO:0043549	XRCC6 PTPRO CDKN1A HSP90AB1 HSP90AA1 PARK7 MAP3K4 BMP4 DDR2 CCN1 RBL1 CASS4 PKD1 SPDYA SPRY2 CLU CORO1C DKK1 PRDX3 BCCIP HNRNPU PIP4K2A PRKAR2A WWTR1 CCNB3 CCNQ LRP5 DGKZ CDC37 PKN1 RGS14 RPS3 FZD4 CHORDC1 UBASH3B MCPH1 NRG1 GCG ALS2 FZD5 HTR2B NPM1 CHMP6 SLC9A3R1 PHB MMD GGNBP2 UNC119 RHOA TIRAP ARHGEF5 PDGFRB UCHL1 PIBF1 DVL2 CEP85 MAPRE3 SPATC1L PTK6 HGS SASH1 INS CEMIP PPM1E NLRC5 CAV3
0.0639854	14	60	2.13931	Small ribosomal subunit	http://amigo.geneontology.org/amigo/term/GO:0015935	RPS11 RPS8 RPS6 MRPS2 RPS28 RPS3 NPM1 RPS21 RPS9 MRPS14 RPS15 RPS2 RPS15A RPS25
0.0639854	14	60	2.13931	Autodegradation of Cdh1 by Cdh1:APC/C	https://reactome.org/download/current	PSMC6 PSMD4 UBE2C RAPSN ANAPC15 PSMC2 PSMD1 PSME3 CDC16 PSMB1 ANAPC2 ANAPC11 PSMD9 PSMC4
0.0644807	17	79	1.97296	Regulation of DNA biosynthetic process	http://amigo.geneontology.org/amigo/term/GO:2000278	ACVRL1 CDKN1A HSP90AB1 HSP90AA1 SMOC2 MAP3K4 TCP1 TERF1 CCT3 CCT7 CCT4 DACH1 HNRNPU DKC1 MAP2K7 ATM NVL
0.0648772	38	226	1.5416	Viral process	http://amigo.geneontology.org/amigo/term/GO:0016032	EP300 BICD1 TRIM26 TRIM15 HSP90AB1 IGF2R VTA1 SNX3 VPS4B TRIM32 GTF2B VAPB DENR SMARCB1 RAB7A PC DDB1 RAPSN SMARCA4 ICAM1 ZC3HAV1 CHMP6 PHB RRP1B MDFIC NUCKS1 SNW1 TARDBP CTSB VPS37B TRIM14 BCL2L1 TBC1D20 STOM MVB12B APCS RAB5A TRIM28
0.0649509	12	48	2.29212	Cellular response to ionizing radiation	http://amigo.geneontology.org/amigo/term/GO:0071479	XRCC6 CDKN1A INO80 RAD51 TMEM109 RAD1 GRB2 NUCKS1 RPL26 YAP1 BCL2L1 CRYAB
0.0650088	30	168	1.63723	SRP-dependent cotranslational protein targeting to membrane	https://reactome.org/download/current	RPS18 RPS11 RPS8 RPS6 RPL30 RPS3A RPLP2 RPS28 SRP68 RPL19 RPS21 RPS27L RPL13 SRP19 RPS17 RPL29 RPL26 RPS7 RPL7 RPS15 RPS2 RPL35 RPL17 RPL23A RPS15A RPL32 RPS25 RPL23 RPL28 RPS24
0.0660275	34	197	1.58237	Nuclear chromosome segregation	http://amigo.geneontology.org/amigo/term/GO:0098813	CCNB1IP1 RCC2 NUDC CDC20 TTK INO80 IVD VPS4B FANCM TERF1 GEN1 RAN HNRNPU NAA50 NAA10 AKAP8 AKAP8L ANAPC15 TPR CENPF ACTR3 CUL3 CHMP6 AXIN2 MEIOC ZNF207 BRIP1 CHMP1A PIBF1 ATM ZWINT FEN1 SFPQ UBE2B
0.0661122	3	4	6.87635	Positive regulation of telomerase RNA localization to Cajal body	http://amigo.geneontology.org/amigo/term/GO:1904874	TCP1 CCT4 DKC1
0.0661122	3	4	6.87635	Regulation of apoptotic cell clearance	http://amigo.geneontology.org/amigo/term/GO:2000425	C2 C3 TGM2
0.0661122	3	4	6.87635	Lamin filament	http://amigo.geneontology.org/amigo/term/GO:0005638	LMNA LMNB1 EIF6
0.0661122	3	4	6.87635	PICln-Sm protein complex	http://amigo.geneontology.org/amigo/term/GO:0034715	CLNS1A SNRPE SNRPD2
0.0661122	3	4	6.87635	Spanning component of plasma membrane	http://amigo.geneontology.org/amigo/term/GO:0044214	CDHR5 CDHR2 TRPM4
0.0661122	3	4	6.87635	Spanning component of membrane	http://amigo.geneontology.org/amigo/term/GO:0089717	CDHR5 CDHR2 TRPM4
0.0661122	3	4	6.87635	Lsm2-8 complex	http://amigo.geneontology.org/amigo/term/GO:0120115	LSM7 LSM8 LSM2
0.0661122	3	4	6.87635	Acid phosphatase activity	http://amigo.geneontology.org/amigo/term/GO:0003993	ACP7 ACP1 ACP3
0.0661122	3	4	6.87635	Thioredoxin-disulfide reductase activity	http://amigo.geneontology.org/amigo/term/GO:0004791	TXNRD1 TXNRD2 NXN
0.0661122	3	4	6.87635	Porphyrin-containing compound catabolic process	http://amigo.geneontology.org/amigo/term/GO:0006787	HMOX2 BLVRB HMOX1
0.0661122	3	4	6.87635	Proteasome-activating activity	http://amigo.geneontology.org/amigo/term/GO:0036402	RAPSN PSMC2 PSMC4
0.0661122	3	4	6.87635	Dopamine receptor binding	http://amigo.geneontology.org/amigo/term/GO:0050780	SLC9A3R1 VPS35 PALM
0.0661122	3	4	6.87635	Neuron-neuron synaptic transmission	http://amigo.geneontology.org/amigo/term/GO:0007270	TMOD2 VDAC1 DLGAP2
0.0661122	3	4	6.87635	PTK6 Activates STAT3	https://reactome.org/download/current	STAP2 STAT3 PTK6
0.0661122	3	4	6.87635	DOID:0110070 arrhythmogenic right ventricular dysplasia 1	ftp://ftp.rgd.mcw.edu/pub/data_release	RYR2 DSG2 PLEC
0.0661122	3	4	6.87635	DOID:9009005 Familial Thoracic Aortic Aneurysm 2	ftp://ftp.rgd.mcw.edu/pub/data_release	ACTA2 FBN2 FLNA
0.0661122	3	4	6.87635	DOID:9008003 Mandibulofacial Dysostosis	ftp://ftp.rgd.mcw.edu/pub/data_release	TCOF1 EFTUD2 POLR1C
0.0661122	9	31	2.66181	Fibroblast migration	http://amigo.geneontology.org/amigo/term/GO:0010761	RCC2 DDR2 CORO1C PRR5L ILK TNS1 BAG4 RAC1 CLN3
0.0661122	3	4	6.87635	PW:0000029 fatty acid biosynthetic pathway	ftp://ftp.rgd.mcw.edu/pub/data_release	MCAT OXSM ACACA
0.0661122	3	4	6.87635	Synaptic vesicle docking	http://amigo.geneontology.org/amigo/term/GO:0016081	CTBP2 STX3 PPFIA3
0.0661122	9	31	2.66181	Myofibril assembly	http://amigo.geneontology.org/amigo/term/GO:0030239	CFL2 TPM1 CAPN3 CASQ1 ACTN2 NEBL LMOD2 WDR1 CAV3
0.0661122	9	31	2.66181	Cortical cytoskeleton organization	http://amigo.geneontology.org/amigo/term/GO:0030865	EPB41 EPB41L3 EPB41L2 STRIP1 NLGN1 CALR CAVIN3 FMNL2 WDR1
0.0661122	3	4	6.87635	Hemidesmosome assembly	http://amigo.geneontology.org/amigo/term/GO:0031581	LAMC1 ITGB4 PLEC
0.0661122	3	4	6.87635	Tetrapyrrole catabolic process	http://amigo.geneontology.org/amigo/term/GO:0033015	HMOX2 BLVRB HMOX1
0.0661122	9	31	2.66181	Spliceosomal complex assembly	http://amigo.geneontology.org/amigo/term/GO:0000245	SNRPC SF3A3 PSIP1 SF3B1 SRSF1 GCFC2 USP39 SRSF10 CRNKL1
0.0661122	16	73	2.00953	Nucleic acid transport	http://amigo.geneontology.org/amigo/term/GO:0050657	NUP107 SRSF3 RAN RBM15B THOC2 DDX39A AKAP8L TPR NPM1 CHTOP FLOT1 KHDRBS1 LOC110257686 YBX1 IWS1 HNRNPA2B1
0.0661122	16	73	2.00953	RNA transport	http://amigo.geneontology.org/amigo/term/GO:0050658	NUP107 SRSF3 RAN RBM15B THOC2 DDX39A AKAP8L TPR NPM1 CHTOP FLOT1 KHDRBS1 LOC110257686 YBX1 IWS1 HNRNPA2B1
0.0661122	3	4	6.87635	CRD-mediated mRNA stabilization	http://amigo.geneontology.org/amigo/term/GO:0070934	HNRNPU IGF2BP1 YBX1
0.0663508	149	1115	1.2252	ATP binding	http://amigo.geneontology.org/amigo/term/GO:0005524	DDX17 ACVRL1 ATP5F1B MYO1A STYK1 ABCD2 DYRK2 PRPF4B RIPK1 MAK SKIV2L HSP90AB1 RUNX2 NEK9 ITPK1 VRK1 HSP90AA1 ATP2C2 DNAJA2 TDRD12 DHX34 RUVBL2 KIF1B KIF17 PARS2 MAP3K4 TCP1 MTHFD1L RARS2 MDN1 ASCC3 TTK ATP5F1A MYO1E INO80 RAD51 VPS4B CLPX FANCM PSMC6 JAK2 UCK1 DDR2 CCT3 ABCA4 PANK2 MYLK2 TRAP1 CCT7 CCT4 ABCG8 MAP4K3 SPAST GRK4 UBA6 ABCG2 CDK8 NEK5 STK24 NEK1 DNAH10 MYO18B HK1 PRKG1 IDE HELLS ENTP…
0.0663508	18	86	1.91898	Transport along microtubule	http://amigo.geneontology.org/amigo/term/GO:0010970	SUN2 BICD1 KIF17 IFT140 SPAST LAMP1 AP3M1 BLOC1S2 HNRNPU KIF5B UCHL1 IFT46 SNAPIN SFPQ CLN3 BLOC1S6 WDR60 NDE1
0.0663508	18	86	1.91898	Proton transmembrane transport	http://amigo.geneontology.org/amigo/term/GO:1902600	ATP5F1B ATP5F1A ATP6V0C ATP6V1C2 HVCN1 ATP6V1A SLC9A6 NNT SLC9A3R1 ATP5MC1 ATP5ME COX5A ATP5PD TMEM268 ATP5F1C ATP5F1D ATP5PB STOML2
0.0666718	21	106	1.81639	G1/S transition of mitotic cell cycle	http://amigo.geneontology.org/amigo/term/GO:0000082	CDKN1A FBXO31 E2F4 RPA2 INO80 RPS6 ANXA1 MTBP PKD1 SPDYA CUL4A PHF8 ACVR1 RPS27L MEPCE CDK4 RPL26 CTDSP2 DACT1 AIF1 KANK2
0.0690225	15	67	2.05264	Regulation of G1/S transition of mitotic cell cycle	http://amigo.geneontology.org/amigo/term/GO:2000045	CDKN1A FBXO31 RPA2 INO80 ANXA1 MTBP PKD1 CUL4A RPS27L MEPCE RPL26 CTDSP2 DACT1 AIF1 KANK2
0.0690711	10	37	2.47796	Stress fiber	http://amigo.geneontology.org/amigo/term/GO:0001725	FBLIM1 TPM1 PGM5 SEPTIN11 ABLIM1 NEBL MYLK TPM4 SEPTIN9 PALLD
0.0690711	6	16	3.43817	SWI/SNF complex	http://amigo.geneontology.org/amigo/term/GO:0016514	BICRAL SS18 ARID1B SMARCB1 SMARCA4 BRD9
0.0690711	10	37	2.47796	Contractile actin filament bundle	http://amigo.geneontology.org/amigo/term/GO:0097517	FBLIM1 TPM1 PGM5 SEPTIN11 ABLIM1 NEBL MYLK TPM4 SEPTIN9 PALLD
0.0690711	26	141	1.69064	Protein targeting	http://amigo.geneontology.org/amigo/term/GO:0006605	HSP90AA1 PDCD5 YWHAZ PEX2 YWHAB GCC2 PEX13 YWHAQ CHCHD4 RAB7A AIFM1 TIMM44 TIMM29 SRPRA PMPCB AGK SRP68 SRP19 ATP5IF1 SEC62 SSR3 HGS BAG4 STOM CEMIP HERPUD1
0.0690711	8	26	2.82107	Porphyrin-containing compound metabolic process	http://amigo.geneontology.org/amigo/term/GO:0006778	CYP1A2 SPTA1 HMOX2 PGRMC1 BLVRB ATP5IF1 SLC11A2 HMOX1
0.0690711	6	16	3.43817	TBP-class protein binding	http://amigo.geneontology.org/amigo/term/GO:0017025	RUVBL2 GTF2B CAND2 YEATS2 TAF13 DR1
0.0690711	6	16	3.43817	Protein kinase A regulatory subunit binding	http://amigo.geneontology.org/amigo/term/GO:0034237	AKAP5 ARFGEF2 RYR2 AKAP8 AKAP9 SPATC1L
0.0690711	6	16	3.43817	Thyroid hormone receptor binding	http://amigo.geneontology.org/amigo/term/GO:0046966	GTF2B ARID5A MED12 GTF2H1 BRD8 THRAP3
0.0690711	6	16	3.43817	MRNA 5 -UTR binding	http://amigo.geneontology.org/amigo/term/GO:0048027	LARP6 IGF2BP2 IGF2BP1 RSL1D1 RPL26 IGF2BP3
0.0690711	8	26	2.82107	Androgen receptor binding	http://amigo.geneontology.org/amigo/term/GO:0050681	EP300 PARK7 ARID5A SMARCA4 CALR PKN1 SNW1 DDX5
0.0690711	6	16	3.43817	MRNA decay by 3' to 5' exoribonuclease	https://reactome.org/download/current	SKIV2L HBS1L EXOSC3 DIS3 EXOSC1 DCPS
0.0690711	25	134	1.71053	DOID:0060224 atrial fibrillation	ftp://ftp.rgd.mcw.edu/pub/data_release	CDKN1A VEGFA CFL2 UBE4B HSPG2 GTF2I CUL4A DNAH10 HIP1R MYO18B SYNPO2L ARMH3 SH3PXD2A BAG3 NEBL CAND2 PAK2 SLC27A6 AKAP9 TFPI SPATS2L CYTH1 PHLDB2 NUCKS1 WDR1
0.0690711	6	16	3.43817	DOID:768 retinoblastoma	ftp://ftp.rgd.mcw.edu/pub/data_release	CEBPA FANCM MTR MGMT SERPINF1 MAX
0.0690711	6	16	3.43817	PW:0000159 Rab family mediated signaling pathway	ftp://ftp.rgd.mcw.edu/pub/data_release	RAB14 ARPC1B ARPC4 DENND1C ACTR3 RAB5A
0.0690711	23	120	1.75729	Regulation of endocytosis	http://amigo.geneontology.org/amigo/term/GO:0030100	PACSIN2 BICD1 RIN3 CDH13 NR1H2 SDCBP TFR2 CLU HIP1R ANKRD13A DKK1 NLGN1 GPC3 C3 RUFY1 CBL FLOT1 HNRNPK SERPINE1 DLL1 MAGI2 CLN3 PPT1
0.0690711	33	191	1.58408	Protein localization to nucleus	http://amigo.geneontology.org/amigo/term/GO:0034504	SUN2 CDKN1A SIN3A IPO4 PARK7 BMP4 LMNA FERMT1 RAN BAG3 HNRNPU WWTR1 HCLS1 POLA2 ELAVL1 CALR TPR BARD1 NPM1 STAT3 ORMDL3 TARDBP MEPCE KPNA3 NVL ATP13A2 YAP1 FLNA INS ING1 MFHAS1 TRIM28 PIN1
0.0690711	6	16	3.43817	Regulation of viral-induced cytoplasmic pattern recognition receptor signaling pathway	http://amigo.geneontology.org/amigo/term/GO:0039531	USP15 TRIM15 PUM2 UFD1 TKFC C1QBP
0.0690711	6	16	3.43817	Regulation of centriole replication	http://amigo.geneontology.org/amigo/term/GO:0046599	MDM1 VPS4B CEP295 NPM1 TRIM37 RBM4
0.0690711	24	127	1.73262	Response to steroid hormone	http://amigo.geneontology.org/amigo/term/GO:0048545	EP300 DDX17 ACSBG1 PARK7 BMP4 ANXA1 RXRG DDRGK1 SLIT2 NCOR2 YWHAH HNRNPU UBA5 SMARCA4 CALR TFPI PHB WBP2 RHOA URI1 POU4F2 YAP1 DDX5 KANK2
0.0690711	6	16	3.43817	Extracellular vesicle biogenesis	http://amigo.geneontology.org/amigo/term/GO:0140112	VPS4B COPS5 SDCBP RAB7A ATP13A2 HGS
0.0690711	10	37	2.47796	Alpha-amino acid biosynthetic process	http://amigo.geneontology.org/amigo/term/GO:1901607	PARK7 CTH PHGDH PSPH MTR ASNS PYCR3 GOT2 CLN3 SHMT2
0.0690711	8	26	2.82107	Positive regulation of cell cycle G2/M phase transition	http://amigo.geneontology.org/amigo/term/GO:1902751	SIN3A RCC2 VPS4B DTL NPM1 CDK4 MECP2 DBF4B
0.0691212	17	80	1.9483	Positive regulation of transmembrane receptor protein serine/threonine kinase signaling pathway	http://amigo.geneontology.org/amigo/term/GO:0090100	EP300 ACVRL1 HSP90AB1 CITED2 RNF165 BMP4 JAK2 SULF1 SDCBP CCN1 FERMT1 GPC3 ELAPOR2 ACVR1 ZEB2 SNW1 ILK
0.0691212	17	80	1.9483	Regulation of cell cycle G1/S phase transition	http://amigo.geneontology.org/amigo/term/GO:1902806	CDKN1A FBXO31 RPA2 INO80 ANXA1 MTBP CRNN PKD1 CUL4A MN1 RPS27L MEPCE RPL26 CTDSP2 DACT1 AIF1 KANK2
0.0692746	36	213	1.5496	Epithelial cell migration	http://amigo.geneontology.org/amigo/term/GO:0010631	ACVRL1 GPLD1 LGMN CDH13 GPI PIK3CD MAPRE2 SMOC2 ATP5F1A CCBE1 BMP4 ANXA1 FERMT1 ATOH8 SLIT2 CORO1C JCAD HRG SRPX2 CALR PKN1 ANGPT2 ADGRA2 RHOA CLEC14A PBLD PTPN11 GLIPR2 SASH1 GPX1 MECP2 RAC1 ARSB KANK2 HMOX1 APOH
0.0694695	90	633	1.30357	Cell morphogenesis	http://amigo.geneontology.org/amigo/term/GO:0000902	PARVB PACSIN2 EP300 PTPRO HSP90AB1 SIN3A HEXA SIPA1L1 CCDC88C ARHGAP35 DRAXIN PDPN RCC2 WASF2 EPB41 CAP1 SS18 DOCK7 RIMS1 RNF165 TPM1 EPB42 NDN ANXA1 IGSF9 SPTA1 CRABP2 STRIP1 DLC1 CASS4 ANTXR1 DPYSL5 LRATD1 SLIT2 SEMA4D CLU CORO1C SART3 YWHAH LGI1 RYK NLGN1 RPL24 SLITRK2 CALR ARAP1 FZD4 LAMB1 LAMC1 FMNL2 TBR1 ALS2 CUL3 NYAP2 STK25 MKLN1 DBNL MYO10 ISL1 BAIAP2 SLC9A3R1 CDC42EP4 NTN1 RHOA FLOT1 CR…
0.0694695	14	61	2.10424	Cell-substrate junction assembly	http://amigo.geneontology.org/amigo/term/GO:0007044	ACVRL1 RCC2 DLC1 THSD1 CORO1C ACTN2 HRG ARHGAP6 LAMC1 ITGB4 PHLDB2 TNS1 RAC1 PLEC
0.0694695	57	372	1.40484	Morphogenesis of an epithelium	http://amigo.geneontology.org/amigo/term/GO:0002009	ACVRL1 RARG CECR2 PKHD1 ARHGAP35 PIK3CD PDPN GRHL3 MTHFD1L CITED2 SERPINB5 BMP4 TNC RSPO2 SULF1 CCN1 FERMT1 ACTB PKD1 SEMA4C SLIT2 SPRY2 RYR2 RYK MED12 GPC3 LRP5 PPP1CA CSMD1 ACVR1 FZD5 HOXA5 ADAMTS12 GRB2 SLC9A3R1 HOXB4 NTN1 RHOA PHLDB2 CARMIL2 LIN7C ILK TGM2 TRAF3IP1 DVL2 DLL1 YAP1 FLNA FGF8 VASP WDR1 TRIM28 NKD1 CAV3 EYA1 LRP2 RALA
0.0694695	14	61	2.10424	Cellular response to unfolded protein	http://amigo.geneontology.org/amigo/term/GO:0034620	EP300 AMFR COPS5 ATF6 DDRGK1 VAPB BAG3 OPTN IL20RB XBP1 WFS1 EIF2S1 HERPUD1 DDIT3
0.0694695	14	61	2.10424	Positive regulation of endocytosis	http://amigo.geneontology.org/amigo/term/GO:0045807	BICD1 TFR2 CLU NLGN1 GPC3 C3 CBL FLOT1 HNRNPK SERPINE1 DLL1 MAGI2 CLN3 PPT1
0.0694695	14	61	2.10424	Regulation of receptor-mediated endocytosis	http://amigo.geneontology.org/amigo/term/GO:0048259	BICD1 RIN3 SDCBP CLU HIP1R ANKRD13A DKK1 C3 CBL FLOT1 HNRNPK SERPINE1 MAGI2 PPT1
0.0694695	14	61	2.10424	Protein tetramerization	http://amigo.geneontology.org/amigo/term/GO:0051262	CTH PKD1 TDO2 CUTC PKD2L1 HSD17B10 CPSF7 KCNC1 FARSA ACACA TRPM4 HPRT1 VASP SHMT2
0.0694695	14	61	2.10424	Establishment of chromosome localization	http://amigo.geneontology.org/amigo/term/GO:0051303	NUDC VPS4B TERF1 HNRNPU CENPF ACTR3 CUL3 CHMP6 MEIOC CHMP1A PIBF1 ATM UBE2B NDE1
0.0708038	11	43	2.34542	MRNA export from nucleus	http://amigo.geneontology.org/amigo/term/GO:0006406	NUP107 SRSF3 RBM15B THOC2 DDX39A AKAP8L TPR CHTOP LOC110257686 IWS1 HNRNPA2B1
0.0708038	11	43	2.34542	Mitochondrial intermembrane space	http://amigo.geneontology.org/amigo/term/GO:0005758	FBXL4 PANK2 TIMM8A AIFM1 TIMM29 COA4 AGK NLN FKBP10 IMMT STOML2
0.0708038	7	21	3.05615	Oxidoreductase activity, acting on the CH-NH group of donors	http://amigo.geneontology.org/amigo/term/GO:0016645	MTHFD1L ETFDH AASS PIPOX BLVRB PYCR3 LOC110256626
0.0708038	11	43	2.34542	Negative regulation of protein polymerization	http://amigo.geneontology.org/amigo/term/GO:0032272	TMOD2 TMOD4 SLIT2 HIP1R SAMD8 LMOD2 CARMIL2 STMN1 SSH3 CAPZA2 GSN
0.0708038	13	55	2.16709	Endocytic recycling	http://amigo.geneontology.org/amigo/term/GO:0032456	AKAP5 RAB14 ACTN2 VPS26A GRIP2 RAB7A CCDC93 EHD4 NDRG4 VPS50 SNX17 VPS35 VPS35L
0.0708038	13	55	2.16709	Regulation of intracellular steroid hormone receptor signaling pathway	http://amigo.geneontology.org/amigo/term/GO:0033143	EP300 PARK7 DDRGK1 NCOR2 UBA5 SMARCA4 CALR PHB WBP2 RHOA YAP1 DDX5 KANK2
0.0708038	11	43	2.34542	Pathway-restricted SMAD protein phosphorylation	http://amigo.geneontology.org/amigo/term/GO:0060389	ACVRL1 USP15 BMP4 SDCBP EMILIN1 DKK1 SNX25 ACVR1 PBLD PMEPA1 PIN1
0.0708038	13	55	2.16709	Regulation of gene silencing	http://amigo.geneontology.org/amigo/term/GO:0060968	PPHLN1 RIPK1 BMP4 PUM2 NCOR2 FXR1 PHF8 ELAVL1 DNMT1 TPR STAT3 DDX5 TRIM28
0.0708038	11	43	2.34542	MRNA-containing ribonucleoprotein complex export from nucleus	http://amigo.geneontology.org/amigo/term/GO:0071427	NUP107 SRSF3 RBM15B THOC2 DDX39A AKAP8L TPR CHTOP LOC110257686 IWS1 HNRNPA2B1
0.0711842	12	49	2.24534	Positive regulation of protein localization to cell periphery	http://amigo.geneontology.org/amigo/term/GO:1904377	AKAP5 EPB41 EPB41L2 KIF5B STX3 SQSTM1 ACSL3 STAC2 ITGA3 ARHGEF16 RACK1 CLN3
0.0711842	12	49	2.24534	RNA-dependent DNA biosynthetic process	http://amigo.geneontology.org/amigo/term/GO:0006278	HSP90AB1 HSP90AA1 MAP3K4 TCP1 TERF1 CCT3 CCT7 CCT4 HNRNPU DKC1 MAP2K7 ATM
0.0711842	30	170	1.61796	Ribosomal subunit	http://amigo.geneontology.org/amigo/term/GO:0044391	RPS11 RPS8 RPS6 MRPS2 RPL30 MRPL43 RPL24 MRPL39 RPLP2 MRPL11 MRPL49 RPS28 MRPL4 RPL27A MRPL48 RPS3 NPM1 RPL19 RPS21 RPL26 RPS9 MRPS14 RPL7 MRPL12 RPS15 RPS2 RPL17 RPS15A RPL32 RPS25
0.0711842	12	49	2.24534	Glutathione metabolic process	http://amigo.geneontology.org/amigo/term/GO:0006749	GSTZ1 PARK7 HPGDS EEF1G GSR G6PD LOC100739508 GPX1 LOC100153094 GCLM CHAC2 CLIC1
0.0711842	21	107	1.79942	Cell cycle checkpoint signaling	http://amigo.geneontology.org/amigo/term/GO:0000075	CDKN1A FBXO31 RPA2 TTK GEN1 CUL4A DNA2 XPC ANAPC15 USP28 TPR RAD1 ZNF207 TAOK1 RPS27L ATM ZWINT RPL26 PTPN11 ATF2 ZNF830
0.0711842	12	49	2.24534	Cellular response to vascular endothelial growth factor stimulus	http://amigo.geneontology.org/amigo/term/GO:0035924	PIK3CD SMOC2 CCBE1 ANXA1 SPRY2 JCAD HRG RELA ADGRA2 ADAMTS12 PDGFRB DLL1
0.0717858	50	319	1.43706	DOID:11832 visual epilepsy	ftp://ftp.rgd.mcw.edu/pub/data_release	GPLD1 POLG DHX34 ARID1B HDAC2 SETBP1 INO80 EGFL7 KCNQ3 YWHAZ CRH DPYD YWHAB ARFGEF2 PKD1 SPAST CLU SAMD8 LGI1 BAG3 HNRNPU KCNT2 KIF5B SLC38A3 GSPT2 PCDH19 SLC25A22 DGKZ KCNC1 PAM SLC12A2 VDAC1 ELAPOR2 GRM3 NRG1 TBR1 IL6ST EFTUD2 TRPM4 SYN2 CYP11A1 MPP4 MARCKSL1 AIF1 WFS1 FLNA INS FOXG1 MECP2 MARCKS
0.0718068	39	236	1.51513	Chromosome segregation	http://amigo.geneontology.org/amigo/term/GO:0007059	CCNB1IP1 CENPT RCC2 NUDC CDC20 TTK INO80 IVD VPS4B FANCM TERF1 PUM2 GEN1 RAN HNRNPU NAA50 NAA10 AKAP8 AKAP8L RGS14 ANAPC15 RPS3 TPR CENPF ACTR3 CUL3 CHMP6 AXIN2 MEIOC ZNF207 BRIP1 CHMP1A PPP2R1A PIBF1 ATM ZWINT FEN1 SFPQ UBE2B
0.0718744	29	163	1.6312	Regulation of response to DNA damage stimulus	http://amigo.geneontology.org/amigo/term/GO:2001020	PARPBP DEK RPA2 ARMT1 RAD51 TRIM32 ERCC4 CUL4A CLU MGMT SKIL RPS3 ACKR3 NPM1 AXIN2 HNRNPK KLHL15 RPL26 SMCHD1 DDX5 SMG1 TMEM161A BCL2L1 EEF1E1 WAS ANKLE1 TRIM28 EYA1 TPT1
0.0728749	70	475	1.35114	Blood vessel development	http://amigo.geneontology.org/amigo/term/GO:0001568	ACVRL1 GPLD1 CDH13 WASF2 SMOC2 CITED2 CCN2 MYO1E TJP1 CCBE1 BMP4 ANXA1 YWHAZ SULF1 CCN1 PANK2 GTF2I PKD1 ANTXR1 EMILIN1 SLIT2 SPRY2 MYO18B ACTA2 JCAD STAB1 HRG MYLK SRPX2 GPC3 LRP5 C3 FZD4 ANGPT2 ADGRA2 ACVR1 FZD5 ACKR3 HOXA5 ISL1 STAT3 FKBP10 GGNBP2 SERPINF1 RHOA HSPB6 CLEC14A SNX17 SERPINE1 DLL1 XBP1 YAP1 HGS SASH1 GPX1 PDCL3 MECP2 MYDGF JMJD6 FGF8 ATF2 MEIS1 FOXJ2 HMOX1 EPN2 EYA1 LRP2 APOH TNN…
