# Supplementary material for: Proteomic landscape of porcine induced neural stem cell reprogramming and differentiation
Source: PeerJ. 2025 Oct 3;13:e20120. doi: 10.7717/peerj.20120 (PMC12499565; doi:10.7717/peerj.20120)
Supplement: Supplemental Information 3 [file peerj-13-20120-s003.xlsx]

## Sheet: Sheet 1
anova_PTMs VB VE
Protein ID	f.value	p.value	-log10(p)	FDR	Fisher's LSD
G9F6X8	343.98	6.4632e-07	6.1896	0.00029376	PTFs - VSMUi002-B; PTFs - VSMUi002-E
A0A287AYA5	253.15	1.6064e-06	5.7941	0.00029376	PTFs - VSMUi002-B; PTFs - VSMUi002-E
B6DU39	248.78	1.6915e-06	5.7717	0.00029376	PTFs - VSMUi002-B; PTFs - VSMUi002-E; VSMUi002-B - VSMUi002-E
A0A5G2RLR7	187.11	3.9294e-06	5.4057	0.00050016	PTFs - VSMUi002-B; PTFs - VSMUi002-E
F1ST70	174.84	4.8e-06	5.3188	0.00050016	PTFs - VSMUi002-B; PTFs - VSMUi002-E
A0A5G2QT89	144.58	8.3998e-06	5.0757	0.00072938	PTFs - VSMUi002-B; PTFs - VSMUi002-E
A0AAS4	115.74	1.6129e-05	4.7924	0.0011862	VSMUi002-B - PTFs; VSMUi002-E - PTFs; VSMUi002-B - VSMUi002-E
A0A4X1WDC7	111.02	1.8215e-05	4.7396	0.0011862	PTFs - VSMUi002-B; PTFs - VSMUi002-E
A0A287AQJ3	102.19	2.3196e-05	4.6346	0.0013428	VSMUi002-E - PTFs; VSMUi002-E - VSMUi002-B
A0A4X1V9X7	89.973	3.3596e-05	4.4737	0.0017504	PTFs - VSMUi002-B; PTFs - VSMUi002-E
A0A4X1UYI1	85.748	3.8627e-05	4.4131	0.0017871	PTFs - VSMUi002-B; PTFs - VSMUi002-E
A0A4X1SZK2	83.887	4.1162e-05	4.3855	0.0017871	VSMUi002-B - PTFs; VSMUi002-E - PTFs; VSMUi002-E - VSMUi002-B
A0A4X1T912	78.028	5.0753e-05	4.2945	0.0019115	PTFs - VSMUi002-B; PTFs - VSMUi002-E
A0A480XDY0	77.705	5.1365e-05	4.2893	0.0019115	PTFs - VSMUi002-B; PTFs - VSMUi002-E
A0A480L4F5	72.609	6.2466e-05	4.2044	0.0021697	PTFs - VSMUi002-B; PTFs - VSMUi002-E
A0A480X6B4	69.928	6.9611e-05	4.1573	0.0022667	VSMUi002-B - PTFs; VSMUi002-E - PTFs; VSMUi002-B - VSMUi002-E
A0A5G2QTR9	63.838	9.0425e-05	4.0437	0.0027713	VSMUi002-B - PTFs; VSMUi002-E - PTFs
F1RQW7	59.558	0.00011029	3.9575	0.0031921	PTFs - VSMUi002-B; VSMUi002-E - PTFs; VSMUi002-E - VSMUi002-B
A0A4X1V4A1	55.621	0.00013403	3.8728	0.0036603	VSMUi002-B - PTFs; VSMUi002-B - VSMUi002-E
A0A4X1UH89	54.706	0.00014051	3.8523	0.0036603	PTFs - VSMUi002-B; PTFs - VSMUi002-E
Q8MHH2	49.185	0.00018998	3.7213	0.0047134	VSMUi002-B - PTFs; VSMUi002-E - PTFs
F1SQ84	46.612	0.00022111	3.6554	0.0052362	VSMUi002-B - PTFs; VSMUi002-B - VSMUi002-E
A0A481DIA0	45.496	0.00023673	3.6257	0.0053004	VSMUi002-B - PTFs; VSMUi002-E - PTFs
Q06AA6	44.542	0.00025127	3.5999	0.0053004	PTFs - VSMUi002-B; PTFs - VSMUi002-E
I3LB82	44.251	0.00025594	3.5919	0.0053004	VSMUi002-B - PTFs; VSMUi002-E - PTFs
I3LCR6	43.044	0.00027659	3.5582	0.0053004	VSMUi002-B - PTFs; VSMUi002-B - VSMUi002-E
A0A287B4N8	42.644	0.00028394	3.5468	0.0053004	PTFs - VSMUi002-B; PTFs - VSMUi002-E
G9JM01	42.133	0.00029369	3.5321	0.0053004	PTFs - VSMUi002-B; PTFs - VSMUi002-E
A0A5G2QS35	42.064	0.00029503	3.5301	0.0053004	VSMUi002-B - PTFs; VSMUi002-E - PTFs; VSMUi002-B - VSMUi002-E
A0A480R9N5	41.331	0.00030992	3.5087	0.0053823	VSMUi002-B - PTFs; VSMUi002-E - PTFs
F1RST2	40.189	0.00033514	3.4748	0.0056077	PTFs - VSMUi002-B; PTFs - VSMUi002-E; VSMUi002-E - VSMUi002-B
A0A4X1TNE0	38.96	0.00036547	3.4372	0.0056077	PTFs - VSMUi002-B; PTFs - VSMUi002-E
A0A287A425	38.494	0.00037794	3.4226	0.0056077	VSMUi002-B - PTFs; VSMUi002-E - PTFs
I3LPH9	38.054	0.00039021	3.4087	0.0056077	VSMUi002-B - PTFs; VSMUi002-E - PTFs
A0A4X1VR78	37.717	0.00039997	3.398	0.0056077	VSMUi002-B - PTFs; VSMUi002-B - VSMUi002-E
F1RZY6	37.297	0.00041263	3.3844	0.0056077	PTFs - VSMUi002-B; PTFs - VSMUi002-E
A0A5G2QWP8	37.18	0.00041623	3.3807	0.0056077	VSMUi002-B - PTFs; VSMUi002-E - PTFs
F1S192	36.954	0.00042332	3.3733	0.0056077	PTFs - VSMUi002-B; PTFs - VSMUi002-E
A0A5G2R0C9	36.463	0.00043932	3.3572	0.0056077	VSMUi002-B - PTFs; VSMUi002-B - VSMUi002-E
I3LQA1	36.306	0.00044461	3.352	0.0056077	VSMUi002-B - PTFs; VSMUi002-E - PTFs
A0A4X1UG35	36.119	0.00045104	3.3458	0.0056077	VSMUi002-B - PTFs; VSMUi002-E - PTFs; VSMUi002-B - VSMUi002-E
A0A4X1V8U5	35.85	0.00046045	3.3368	0.0056077	VSMUi002-B - PTFs; VSMUi002-E - PTFs; VSMUi002-E - VSMUi002-B
A0A287AUB4	35.612	0.00046902	3.3288	0.0056077	VSMUi002-E - PTFs; VSMUi002-E - VSMUi002-B
A0A5G2R9A2	35.323	0.0004797	3.319	0.0056077	PTFs - VSMUi002-B; VSMUi002-E - PTFs; VSMUi002-E - VSMUi002-B
A0A4X1UVB2	35.079	0.00048899	3.3107	0.0056077	PTFs - VSMUi002-B; PTFs - VSMUi002-E
A0A4X1T5M9	34.911	0.00049551	3.3049	0.0056077	VSMUi002-B - PTFs; VSMUi002-E - PTFs
Q5USC2	34.651	0.00050588	3.296	0.0056077	VSMUi002-B - PTFs; VSMUi002-B - VSMUi002-E
D4NXM0	34.344	0.00051842	3.2853	0.005627	PTFs - VSMUi002-B; PTFs - VSMUi002-E
F1RY33	33.651	0.00054842	3.2609	0.0058312	PTFs - VSMUi002-B; PTFs - VSMUi002-E
A0A286ZKF2	32.696	0.00059362	3.2265	0.0061409	PTFs - VSMUi002-B; PTFs - VSMUi002-E
F1SUA1	32.547	0.00060113	3.221	0.0061409	VSMUi002-B - PTFs; VSMUi002-E - PTFs
I3LL82	31.145	0.00067825	3.1686	0.0067307	PTFs - VSMUi002-B; PTFs - VSMUi002-E
A0A4X1SVD4	31.037	0.0006847	3.1645	0.0067307	PTFs - VSMUi002-B; PTFs - VSMUi002-E
F1SLF7	30.552	0.00071481	3.1458	0.0068966	PTFs - VSMUi002-B; PTFs - VSMUi002-E
A0A4X1SNE4	30.022	0.00074978	3.1251	0.0069723	VSMUi002-B - PTFs; VSMUi002-B - VSMUi002-E
A0A4X1SRE0	29.827	0.00076326	3.1173	0.0069723	VSMUi002-E - PTFs; VSMUi002-E - VSMUi002-B
A0A4X1VII5	29.707	0.0007717	3.1126	0.0069723	VSMUi002-E - PTFs; VSMUi002-E - VSMUi002-B
Q9XT34	29.644	0.00077619	3.11	0.0069723	PTFs - VSMUi002-B; PTFs - VSMUi002-E
A0A5G2QP21	29.196	0.00080899	3.0921	0.0071438	VSMUi002-B - PTFs; VSMUi002-E - PTFs
A0A287A2S6	28.14	0.00089413	3.0486	0.007764	VSMUi002-B - PTFs; VSMUi002-B - VSMUi002-E
A0A4X1UVU6	27.829	0.00092148	3.0355	0.0078703	VSMUi002-B - PTFs; VSMUi002-E - PTFs
A0A4X1VKW7	27.649	0.00093779	3.0279	0.0078805	PTFs - VSMUi002-B; PTFs - VSMUi002-E
Q6YLJ6	27.134	0.00098672	3.0058	0.0081551	PTFs - VSMUi002-B; PTFs - VSMUi002-E
A0A5G2QTC7	26.982	0.0010018	2.9992	0.0081551	PTFs - VSMUi002-B; PTFs - VSMUi002-E
A0A4X1TFD3	26.62	0.0010389	2.9834	0.0082997	VSMUi002-B - PTFs; VSMUi002-E - PTFs; VSMUi002-B - VSMUi002-E
A0A4X1UHK6	26.328	0.0010703	2.9705	0.0082997	VSMUi002-B - PTFs; VSMUi002-E - PTFs
A0A287AHU7	26.251	0.0010788	2.9671	0.0082997	PTFs - VSMUi002-B; PTFs - VSMUi002-E
A0A4X1T354	26.211	0.0010833	2.9653	0.0082997	VSMUi002-B - PTFs; VSMUi002-B - VSMUi002-E
A0A5G2QIS1	25.914	0.0011169	2.952	0.0084336	PTFs - VSMUi002-B; PTFs - VSMUi002-E
A0A4X1UB85	25.376	0.0011817	2.9275	0.008795	VSMUi002-B - PTFs; VSMUi002-E - PTFs
Q08092	25.111	0.0012154	2.9153	0.0089091	PTFs - VSMUi002-B; PTFs - VSMUi002-E
A0A5G2RE35	24.991	0.0012312	2.9097	0.0089091	VSMUi002-B - PTFs; VSMUi002-E - PTFs
A0A4X1V7J6	24.593	0.0012851	2.891	0.0091657	VSMUi002-B - PTFs; VSMUi002-E - PTFs; VSMUi002-B - VSMUi002-E
A0A4X1W8I9	24.475	0.0013018	2.8854	0.0091657	PTFs - VSMUi002-B; PTFs - VSMUi002-E
A0A4X1WE61	24.27	0.0013313	2.8757	0.0092484	VSMUi002-B - PTFs; VSMUi002-B - VSMUi002-E
P80276	24.105	0.0013559	2.8678	0.0092694	PTFs - VSMUi002-B; PTFs - VSMUi002-E
B5M997	24.012	0.0013699	2.8633	0.0092694	VSMUi002-B - PTFs; VSMUi002-E - PTFs
A0A5G2QPG1	23.677	0.0014222	2.847	0.0094997	PTFs - VSMUi002-B; VSMUi002-E - VSMUi002-B
A0A4X1VA55	23.234	0.0014954	2.8252	0.0098623	VSMUi002-B - PTFs; VSMUi002-E - PTFs; VSMUi002-B - VSMUi002-E
A0A4X1W1S4	23.039	0.0015293	2.8155	0.0099596	PTFs - VSMUi002-B; VSMUi002-E - PTFs; VSMUi002-E - VSMUi002-B
Q9BGH3	22.93	0.0015487	2.81	0.0099612	VSMUi002-B - PTFs; VSMUi002-E - PTFs
F1SUT6	22.552	0.0016184	2.7909	0.010283	VSMUi002-B - PTFs; VSMUi002-B - VSMUi002-E
A0A287B3J4	22.196	0.0016879	2.7726	0.010595	VSMUi002-B - PTFs; VSMUi002-B - VSMUi002-E
A0A287AZQ6	22.02	0.0017238	2.7635	0.010675	PTFs - VSMUi002-B; PTFs - VSMUi002-E
A0A287AJ61	21.925	0.0017436	2.7586	0.010675	VSMUi002-B - PTFs; VSMUi002-E - PTFs
A0A5G2QH07	21.837	0.0017622	2.754	0.010675	VSMUi002-B - PTFs; VSMUi002-B - VSMUi002-E
A0A480HBG4	21.708	0.0017899	2.7472	0.010719	PTFs - VSMUi002-B; PTFs - VSMUi002-E
A0A480TWH5	21.577	0.0018189	2.7402	0.010769	VSMUi002-B - PTFs; VSMUi002-E - PTFs
A0A287BJG7	21.457	0.0018456	2.7339	0.010804	VSMUi002-B - PTFs; VSMUi002-E - PTFs
A0A287AL30	21.24	0.0018958	2.7222	0.010969	PTFs - VSMUi002-B; PTFs - VSMUi002-E
A0A4X1TW52	21.155	0.0019159	2.7176	0.010969	VSMUi002-B - PTFs; VSMUi002-E - PTFs
P21753	20.994	0.0019545	2.709	0.011012	VSMUi002-B - PTFs; VSMUi002-E - PTFs; VSMUi002-B - VSMUi002-E
A0A4X1VVJ4	20.948	0.0019658	2.7065	0.011012	PTFs - VSMUi002-B; PTFs - VSMUi002-E
I3LAA3	20.201	0.002162	2.6651	0.011983	VSMUi002-B - PTFs; VSMUi002-E - PTFs
A0A4X1T2J0	19.807	0.0022759	2.6429	0.012481	VSMUi002-B - PTFs; VSMUi002-B - VSMUi002-E
A0A5G2RCZ1	19.538	0.0023585	2.6274	0.0128	VSMUi002-E - PTFs; VSMUi002-E - VSMUi002-B
A0A5G2RK54	19.274	0.0024432	2.612	0.013009	VSMUi002-B - PTFs; VSMUi002-B - VSMUi002-E
I3L5T0	19.213	0.0024633	2.6085	0.013009	PTFs - VSMUi002-B; PTFs - VSMUi002-E
A0A287AUW4	19.188	0.0024719	2.607	0.013009	VSMUi002-B - PTFs; VSMUi002-E - PTFs
A0A480VF19	19.004	0.0025344	2.5961	0.013204	PTFs - VSMUi002-B; PTFs - VSMUi002-E
A0A480K7P2	18.569	0.0026909	2.5701	0.01368	VSMUi002-B - PTFs; VSMUi002-E - PTFs
A0A480HK81	18.544	0.0027	2.5686	0.01368	PTFs - VSMUi002-E; VSMUi002-B - VSMUi002-E
A0A5G2QVY7	18.532	0.0027045	2.5679	0.01368	VSMUi002-B - PTFs; VSMUi002-E - PTFs
A0A480Q013	18.448	0.0027367	2.5628	0.01371	VSMUi002-B - PTFs; VSMUi002-E - PTFs
A0A4X1VRI2	18.135	0.00286	2.5436	0.014191	VSMUi002-B - PTFs; VSMUi002-B - VSMUi002-E
A0A287A0I9	17.886	0.0029634	2.5282	0.014565	PTFs - VSMUi002-B; PTFs - VSMUi002-E
A0A5G2RI25	17.602	0.0030877	2.5104	0.015034	VSMUi002-B - PTFs; VSMUi002-B - VSMUi002-E
A0A480KCF0	17.532	0.0031196	2.5059	0.015049	VSMUi002-B - PTFs; VSMUi002-E - PTFs
A0A480V5Q8	17.319	0.0032185	2.4924	0.015384	VSMUi002-B - PTFs; VSMUi002-B - VSMUi002-E
A0A4X1VQZ3	17.085	0.0033325	2.4772	0.015784	PTFs - VSMUi002-B; PTFs - VSMUi002-E; VSMUi002-E - VSMUi002-B
A0A480YTE0	16.912	0.0034199	2.466	0.016052	VSMUi002-B - PTFs; VSMUi002-E - PTFs
A0A4X1VSW8	16.454	0.0036674	2.4356	0.01706	PTFs - VSMUi002-B; PTFs - VSMUi002-E
A0A287AYC5	16.326	0.0037408	2.427	0.017247	VSMUi002-E - PTFs; VSMUi002-E - VSMUi002-B
Q7SIB7	16.007	0.0039318	2.4054	0.01786	PTFs - VSMUi002-B; PTFs - VSMUi002-E
A0A4X1UUL1	15.915	0.0039896	2.3991	0.01786	VSMUi002-B - PTFs; VSMUi002-E - PTFs
A0A480N052	15.889	0.004006	2.3973	0.01786	VSMUi002-B - PTFs; VSMUi002-E - PTFs
F1RQR5	15.882	0.0040107	2.3968	0.01786	VSMUi002-B - PTFs; VSMUi002-E - PTFs; VSMUi002-B - VSMUi002-E
A0A286ZR71	15.735	0.0041058	2.3866	0.018128	PTFs - VSMUi002-B; PTFs - VSMUi002-E
A0A480PHJ6	15.38	0.0043487	2.3616	0.019039	PTFs - VSMUi002-B; PTFs - VSMUi002-E
A0A4X1T5Q8	15.144	0.0045201	2.3449	0.019625	VSMUi002-B - PTFs; VSMUi002-E - PTFs
P19133	14.909	0.0047007	2.3278	0.02024	VSMUi002-B - PTFs; VSMUi002-E - PTFs
A0A4X1VG93	14.799	0.0047879	2.3199	0.020421	VSMUi002-B - PTFs; VSMUi002-E - PTFs
A0A4X1TFE5	14.746	0.0048315	2.3159	0.020421	VSMUi002-B - PTFs; VSMUi002-E - PTFs
A0A286ZL26	14.711	0.0048603	2.3133	0.020421	VSMUi002-B - PTFs; VSMUi002-E - PTFs
A0A2C9F382	14.465	0.0050685	2.2951	0.021125	VSMUi002-B - PTFs; VSMUi002-E - PTFs
Q5G6V9	14.193	0.0053128	2.2747	0.021767	PTFs - VSMUi002-B; PTFs - VSMUi002-E
A0A480N6M2	14.166	0.0053377	2.2726	0.021767	PTFs - VSMUi002-B; PTFs - VSMUi002-E
I3LN78	14.155	0.0053478	2.2718	0.021767	VSMUi002-B - PTFs; VSMUi002-E - PTFs
A0A4X1VJC0	14.023	0.0054731	2.2618	0.022022	VSMUi002-B - PTFs; VSMUi002-E - PTFs
K9J4R3	13.993	0.0055026	2.2594	0.022022	PTFs - VSMUi002-B; PTFs - VSMUi002-E
A0A5G2QWI8	13.931	0.0055634	2.2547	0.022022	PTFs - VSMUi002-B; PTFs - VSMUi002-E
O97580	13.914	0.0055795	2.2534	0.022022	PTFs - VSMUi002-B; VSMUi002-E - VSMUi002-B
B8XSJ2	13.782	0.005713	2.2431	0.022379	VSMUi002-B - PTFs; VSMUi002-E - PTFs
A0A287A9Z7	13.655	0.0058439	2.2333	0.022721	VSMUi002-B - PTFs; VSMUi002-B - VSMUi002-E
A0A4X1TAQ7	13.258	0.0062825	2.2019	0.024246	VSMUi002-B - PTFs; VSMUi002-E - PTFs
A0A287AQD6	13.167	0.0063898	2.1945	0.024479	VSMUi002-B - PTFs; VSMUi002-B - VSMUi002-E
D3K5N3	12.961	0.0066397	2.1779	0.025132	PTFs - VSMUi002-B; PTFs - VSMUi002-E
A0A287BEZ8	12.948	0.0066569	2.1767	0.025132	VSMUi002-B - PTFs; VSMUi002-E - PTFs
A0A5G2QJK4	12.582	0.0071372	2.1465	0.026752	VSMUi002-B - PTFs; VSMUi002-E - PTFs
A0A480RQ36	12.506	0.007242	2.1401	0.026951	VSMUi002-B - PTFs; VSMUi002-B - VSMUi002-E
A0A5G2QUJ0	12.445	0.0073287	2.135	0.027068	PTFs - VSMUi002-B; PTFs - VSMUi002-E
A0A287AXK5	12.392	0.0074042	2.1305	0.027068	VSMUi002-B - PTFs; VSMUi002-E - PTFs
A0A4X1W8E1	12.351	0.0074639	2.127	0.027068	PTFs - VSMUi002-B; PTFs - VSMUi002-E
A0A5G2R3M8	12.302	0.0075363	2.1228	0.027068	VSMUi002-B - PTFs; VSMUi002-E - PTFs
A0A5G2QLL0	12.291	0.0075521	2.1219	0.027068	PTFs - VSMUi002-B; VSMUi002-E - VSMUi002-B
A0A481C8Y3	12.235	0.0076362	2.1171	0.027068	PTFs - VSMUi002-B; PTFs - VSMUi002-E
A0A480YBQ3	12.234	0.0076374	2.1171	0.027068	PTFs - VSMUi002-B; PTFs - VSMUi002-E
I3L5F6	12.156	0.0077557	2.1104	0.027302	PTFs - VSMUi002-B; PTFs - VSMUi002-E
A0A480YND6	12.099	0.0078443	2.1054	0.027422	PTFs - VSMUi002-B; VSMUi002-E - VSMUi002-B
A0A5G2R1D7	12.066	0.0078951	2.1026	0.027422	VSMUi002-B - PTFs; VSMUi002-E - PTFs
A0A4X1VGS9	11.923	0.0081248	2.0902	0.028033	PTFs - VSMUi002-B; PTFs - VSMUi002-E
A0A480PP93	11.885	0.0081862	2.0869	0.028059	VSMUi002-B - PTFs; VSMUi002-E - PTFs
A0A5G2RA04	11.798	0.0083325	2.0792	0.028374	VSMUi002-B - PTFs; VSMUi002-B - VSMUi002-E
F1SCM7	11.645	0.0085957	2.0657	0.028985	VSMUi002-B - PTFs; VSMUi002-E - PTFs
F1RMW5	11.619	0.0086419	2.0634	0.028985	PTFs - VSMUi002-B; PTFs - VSMUi002-E
A0A286ZZZ4	11.598	0.0086787	2.0615	0.028985	VSMUi002-E - PTFs; VSMUi002-E - VSMUi002-B
K7GRT4	11.474	0.0089039	2.0504	0.029547	VSMUi002-B - PTFs; VSMUi002-E - PTFs
F1S3D6	11.392	0.0090582	2.043	0.029555	VSMUi002-E - PTFs; VSMUi002-E - VSMUi002-B
A0A4X1W5P4	11.383	0.0090743	2.0422	0.029555	PTFs - VSMUi002-B; PTFs - VSMUi002-E
F1RJ25	11.382	0.0090765	2.0421	0.029555	PTFs - VSMUi002-E; VSMUi002-B - VSMUi002-E
F1RH58	11.351	0.0091352	2.0393	0.029562	VSMUi002-B - PTFs; VSMUi002-E - PTFs
A0A287AM59	11.225	0.0093793	2.0278	0.030164	PTFs - VSMUi002-B; PTFs - VSMUi002-E
K7GLU6	11.155	0.0095193	2.0214	0.030427	PTFs - VSMUi002-B; PTFs - VSMUi002-E
A0A480X1M7	10.848	0.010167	1.9928	0.032298	VSMUi002-B - PTFs; VSMUi002-E - PTFs
A0A5G2QQY0	10.82	0.01023	1.9901	0.032301	VSMUi002-B - PTFs; VSMUi002-E - PTFs
F1S2T8	10.766	0.010351	1.985	0.032323	PTFs - VSMUi002-B; PTFs - VSMUi002-E
A0A4X1UKW0	10.727	0.010438	1.9814	0.032323	PTFs - VSMUi002-B; PTFs - VSMUi002-E
A0A4X1UD29	10.71	0.010478	1.9797	0.032323	PTFs - VSMUi002-B; PTFs - VSMUi002-E
A0A286ZY96	10.707	0.010485	1.9794	0.032323	VSMUi002-B - PTFs; VSMUi002-E - PTFs
A0A287AL79	10.608	0.010714	1.97	0.032836	VSMUi002-B - PTFs; VSMUi002-E - PTFs
A0A480LYL5	10.493	0.010992	1.9589	0.033489	VSMUi002-B - PTFs; VSMUi002-B - VSMUi002-E
F1S793	10.217	0.011695	1.932	0.035423	VSMUi002-B - PTFs; VSMUi002-E - PTFs
A0A287BAY6	10.102	0.012005	1.9206	0.036154	VSMUi002-E - PTFs; VSMUi002-E - VSMUi002-B
F1RYV5	9.8106	0.012843	1.8913	0.038368	VSMUi002-B - PTFs; VSMUi002-E - PTFs
F1RVY7	9.7957	0.012888	1.8898	0.038368	PTFs - VSMUi002-B; PTFs - VSMUi002-E
F1SFH0	9.7345	0.013074	1.8836	0.038703	VSMUi002-B - PTFs; VSMUi002-B - VSMUi002-E
P18137	9.674	0.013262	1.8774	0.039038	PTFs - VSMUi002-B; PTFs - VSMUi002-E
A0A287A2R7	9.514	0.013778	1.8608	0.040327	PTFs - VSMUi002-B; PTFs - VSMUi002-E
A0A287ANI4	9.3861	0.014209	1.8474	0.040928	VSMUi002-B - PTFs; VSMUi002-E - PTFs
A0A286ZLE9	9.3857	0.01421	1.8474	0.040928	PTFs - VSMUi002-E; VSMUi002-B - VSMUi002-E
P30555	9.3833	0.014219	1.8471	0.040928	VSMUi002-B - PTFs; VSMUi002-E - PTFs
I3LQH2	9.317	0.01445	1.8401	0.041364	VSMUi002-B - PTFs; VSMUi002-E - PTFs
P62936	9.223	0.014785	1.8302	0.042078	PTFs - VSMUi002-E; VSMUi002-B - VSMUi002-E
A0A286ZUU1	9.197	0.01488	1.8274	0.042078	PTFs - VSMUi002-B; PTFs - VSMUi002-E
A0A286ZU26	9.1803	0.014941	1.8256	0.042078	VSMUi002-B - PTFs
F1RPT7	9.0891	0.015282	1.8158	0.042626	VSMUi002-B - PTFs
A0A5G2R4Q3	9.0723	0.015346	1.814	0.042626	VSMUi002-B - PTFs; VSMUi002-E - PTFs
A0A480XM87	9.063	0.015381	1.813	0.042626	VSMUi002-B - PTFs; VSMUi002-B - VSMUi002-E
A0A480IF46	9.0056	0.015603	1.8068	0.043012	VSMUi002-B - PTFs; VSMUi002-E - PTFs
A0A4X1VRX1	8.9797	0.015705	1.804	0.043064	VSMUi002-B - PTFs; VSMUi002-E - PTFs
A0A480L5U4	8.8908	0.016059	1.7943	0.043806	VSMUi002-B - PTFs
I3LAJ6	8.5838	0.017371	1.7602	0.047136	VSMUi002-B - PTFs; VSMUi002-E - PTFs
A0A5G2QVV2	8.497	0.017767	1.7504	0.047961	PTFs - VSMUi002-B; PTFs - VSMUi002-E
A0A4X1UX48	8.4174	0.018141	1.7413	0.048719	PTFs - VSMUi002-B; PTFs - VSMUi002-E
