# Supplementary material for: Proteomic landscape of porcine induced neural stem cell reprogramming and differentiation
Source: PeerJ. 2025 Oct 3;13:e20120. doi: 10.7717/peerj.20120 (PMC12499565; doi:10.7717/peerj.20120)
Supplement: Supplemental Information 4 [file peerj-13-20120-s004.xlsx]

## Sheet: A0A287AAR4
Replicate	Protein Description	Protein Name	Total Area		Average Mass Error PPM	Peptide Sequence	Peptide Result
iNS15-R1-1_SW_RB1_01_8014	Actin beta OS=Sus scrofa OX=9823 GN=ACTB PE=3 SV=2	tr|A0A287AAR4|A0A287AAR4_PIG	409507		-5.3	AGFAGDDAPR	RT: 45.94
iNS15-R1-1_SW_RB1_01_8014	Actin beta OS=Sus scrofa OX=9823 GN=ACTB PE=3 SV=2	tr|A0A287AAR4|A0A287AAR4_PIG	13300		1.8	AGFAGDDAPRAVFPSIVGRPR	RT: 84.66
iNS15-R1-1_SW_RB1_01_8014	Actin beta OS=Sus scrofa OX=9823 GN=ACTB PE=3 SV=2	tr|A0A287AAR4|A0A287AAR4_PIG	13281		1.5	AGFAGDDAPRAVFPSIVGRPR	RT: 84.66
iNS15-R1-1_SW_RB1_01_8014	Actin beta OS=Sus scrofa OX=9823 GN=ACTB PE=3 SV=2	tr|A0A287AAR4|A0A287AAR4_PIG	551		0	AVFPSIVGRPR	RT: 66.36
iNS15-R1-1_SW_RB1_01_8014	Actin beta OS=Sus scrofa OX=9823 GN=ACTB PE=3 SV=2	tr|A0A287AAR4|A0A287AAR4_PIG	86754		-1.1	AVFPSIVGRPR	RT: 66.36
iNS15-R1-1_SW_RB1_01_8014	Actin beta OS=Sus scrofa OX=9823 GN=ACTB PE=3 SV=2	tr|A0A287AAR4|A0A287AAR4_PIG	69578		-1.9	CPEALFQPSFLGMESCGIHETTFNSIMK	RT: 138.52
iNS15-R1-1_SW_RB1_01_8014	Actin beta OS=Sus scrofa OX=9823 GN=ACTB PE=3 SV=2	tr|A0A287AAR4|A0A287AAR4_PIG	9918		-2.7	DLTDYLMK	RT: 107.09
iNS15-R1-1_SW_RB1_01_8014	Actin beta OS=Sus scrofa OX=9823 GN=ACTB PE=3 SV=2	tr|A0A287AAR4|A0A287AAR4_PIG	109250		-1.8	DLTDYLMKILTER	RT: 72.35
iNS15-R1-1_SW_RB1_01_8014	Actin beta OS=Sus scrofa OX=9823 GN=ACTB PE=3 SV=2	tr|A0A287AAR4|A0A287AAR4_PIG	24605		-2.1	DLYANTVLSGGTTMYPGIADR	RT: 129.19
iNS15-R1-1_SW_RB1_01_8014	Actin beta OS=Sus scrofa OX=9823 GN=ACTB PE=3 SV=2	tr|A0A287AAR4|A0A287AAR4_PIG	26296		1.6	DLYANTVLSGGTTMYPGIADR	RT: 129.19
iNS15-R1-1_SW_RB1_01_8014	Actin beta OS=Sus scrofa OX=9823 GN=ACTB PE=3 SV=2	tr|A0A287AAR4|A0A287AAR4_PIG	403085		0.2	DLYANTVLSGGTTMYPGIADR	RT: 85.07
iNS15-R1-1_SW_RB1_01_8014	Actin beta OS=Sus scrofa OX=9823 GN=ACTB PE=3 SV=2	tr|A0A287AAR4|A0A287AAR4_PIG	5130		2.1	DLYANTVLSGGTTMYPGIADR	RT: 85.07
iNS15-R1-1_SW_RB1_01_8014	Actin beta OS=Sus scrofa OX=9823 GN=ACTB PE=3 SV=2	tr|A0A287AAR4|A0A287AAR4_PIG	41838		-0.9	DSYVGDEAQSK	RT: 46.78
iNS15-R1-1_SW_RB1_01_8014	Actin beta OS=Sus scrofa OX=9823 GN=ACTB PE=3 SV=2	tr|A0A287AAR4|A0A287AAR4_PIG	1159		-2.6	DSYVGDEAQSK	RT: 46.78
iNS15-R1-1_SW_RB1_01_8014	Actin beta OS=Sus scrofa OX=9823 GN=ACTB PE=3 SV=2	tr|A0A287AAR4|A0A287AAR4_PIG	288458		-6.9	DSYVGDEAQSKR	RT: 44.83
iNS15-R1-1_SW_RB1_01_8014	Actin beta OS=Sus scrofa OX=9823 GN=ACTB PE=3 SV=2	tr|A0A287AAR4|A0A287AAR4_PIG	288496		-6.9	DSYVGDEAQSKR	RT: 44.83
iNS15-R1-1_SW_RB1_01_8014	Actin beta OS=Sus scrofa OX=9823 GN=ACTB PE=3 SV=2	tr|A0A287AAR4|A0A287AAR4_PIG	77083		3.3	EITALAPSTMK	RT: 69.5
iNS15-R1-1_SW_RB1_01_8014	Actin beta OS=Sus scrofa OX=9823 GN=ACTB PE=3 SV=2	tr|A0A287AAR4|A0A287AAR4_PIG	141037		-0.7	EITALAPSTMK	RT: 68.11
iNS15-R1-1_SW_RB1_01_8014	Actin beta OS=Sus scrofa OX=9823 GN=ACTB PE=3 SV=2	tr|A0A287AAR4|A0A287AAR4_PIG	28063		-1.6	EITALAPSTMKIK	RT: 77.23
iNS15-R1-1_SW_RB1_01_8014	Actin beta OS=Sus scrofa OX=9823 GN=ACTB PE=3 SV=2	tr|A0A287AAR4|A0A287AAR4_PIG	24206		0.1	EITALAPSTMKIK	RT: 77.23
iNS15-R1-1_SW_RB1_01_8014	Actin beta OS=Sus scrofa OX=9823 GN=ACTB PE=3 SV=2	tr|A0A287AAR4|A0A287AAR4_PIG	8987		0.8	EITALAPSTMKIK	RT: 71.38
iNS15-R1-1_SW_RB1_01_8014	Actin beta OS=Sus scrofa OX=9823 GN=ACTB PE=3 SV=2	tr|A0A287AAR4|A0A287AAR4_PIG	23332		3.4	EKLCYVALDFEQEMATAASSSSLEK	RT: 129.26
iNS15-R1-1_SW_RB1_01_8014	Actin beta OS=Sus scrofa OX=9823 GN=ACTB PE=3 SV=2	tr|A0A287AAR4|A0A287AAR4_PIG	14345		-4.4	EKMTQIMFETFNTPAMYVAIQAVLSLYASGR	RT: 196.86
iNS15-R1-1_SW_RB1_01_8014	Actin beta OS=Sus scrofa OX=9823 GN=ACTB PE=3 SV=2	tr|A0A287AAR4|A0A287AAR4_PIG	8987		-5.3	FRCPEALFQPSFLGMESCGIHETTFNSIMK	RT: 124.41
iNS15-R1-1_SW_RB1_01_8014	Actin beta OS=Sus scrofa OX=9823 GN=ACTB PE=3 SV=2	tr|A0A287AAR4|A0A287AAR4_PIG	11552		1.4	FRCPEALFQPSFLGMESCGIHETTFNSIMK	RT: 118.75
iNS15-R1-1_SW_RB1_01_8014	Actin beta OS=Sus scrofa OX=9823 GN=ACTB PE=3 SV=2	tr|A0A287AAR4|A0A287AAR4_PIG	7353		-5.7	FRCPEALFQPSFLGMESCGIHETTFNSIMK	RT: 122.54
iNS15-R1-1_SW_RB1_01_8014	Actin beta OS=Sus scrofa OX=9823 GN=ACTB PE=3 SV=2	tr|A0A287AAR4|A0A287AAR4_PIG	350854		-5.6	GYSFTTTAER	RT: 51.5
iNS15-R1-1_SW_RB1_01_8014	Actin beta OS=Sus scrofa OX=9823 GN=ACTB PE=3 SV=2	tr|A0A287AAR4|A0A287AAR4_PIG	93556		-7.1	GYSFTTTAEREIVR	RT: 70.82
iNS15-R1-1_SW_RB1_01_8014	Actin beta OS=Sus scrofa OX=9823 GN=ACTB PE=3 SV=2	tr|A0A287AAR4|A0A287AAR4_PIG	24947		0	HQGVMVGMGQK	RT: 29.68
iNS15-R1-1_SW_RB1_01_8014	Actin beta OS=Sus scrofa OX=9823 GN=ACTB PE=3 SV=2	tr|A0A287AAR4|A0A287AAR4_PIG	26125		-6.4	HQGVMVGMGQK	RT: 28.84
iNS15-R1-1_SW_RB1_01_8014	Actin beta OS=Sus scrofa OX=9823 GN=ACTB PE=3 SV=2	tr|A0A287AAR4|A0A287AAR4_PIG	43814		-2.1	HQGVMVGMGQK	RT: 47.4
iNS15-R1-1_SW_RB1_01_8014	Actin beta OS=Sus scrofa OX=9823 GN=ACTB PE=3 SV=2	tr|A0A287AAR4|A0A287AAR4_PIG	50559		1.9	HQGVMVGMGQK	RT: 17.72
iNS15-R1-1_SW_RB1_01_8014	Actin beta OS=Sus scrofa OX=9823 GN=ACTB PE=3 SV=2	tr|A0A287AAR4|A0A287AAR4_PIG	49875		1.7	HQGVMVGMGQK	RT: 17.72
iNS15-R1-1_SW_RB1_01_8014	Actin beta OS=Sus scrofa OX=9823 GN=ACTB PE=3 SV=2	tr|A0A287AAR4|A0A287AAR4_PIG	240147		2.8	HQGVMVGMGQKDSYVGDEAQSK	RT: 53.81
iNS15-R1-1_SW_RB1_01_8014	Actin beta OS=Sus scrofa OX=9823 GN=ACTB PE=3 SV=2	tr|A0A287AAR4|A0A287AAR4_PIG	42256		3	HQGVMVGMGQKDSYVGDEAQSK	RT: 53.81
iNS15-R1-1_SW_RB1_01_8014	Actin beta OS=Sus scrofa OX=9823 GN=ACTB PE=3 SV=2	tr|A0A287AAR4|A0A287AAR4_PIG	48982		0.1	HQGVMVGMGQKDSYVGDEAQSK	RT: 48.32
iNS15-R1-1_SW_RB1_01_8014	Actin beta OS=Sus scrofa OX=9823 GN=ACTB PE=3 SV=2	tr|A0A287AAR4|A0A287AAR4_PIG	6593		-0.7	HQGVMVGMGQKDSYVGDEAQSK	RT: 48.32
iNS15-R1-1_SW_RB1_01_8014	Actin beta OS=Sus scrofa OX=9823 GN=ACTB PE=3 SV=2	tr|A0A287AAR4|A0A287AAR4_PIG	37278		-4.1	HQGVMVGMGQKDSYVGDEAQSK	RT: 47.15
iNS15-R1-1_SW_RB1_01_8014	Actin beta OS=Sus scrofa OX=9823 GN=ACTB PE=3 SV=2	tr|A0A287AAR4|A0A287AAR4_PIG	36708		-4.1	HQGVMVGMGQKDSYVGDEAQSK	RT: 47.15
iNS15-R1-1_SW_RB1_01_8014	Actin beta OS=Sus scrofa OX=9823 GN=ACTB PE=3 SV=2	tr|A0A287AAR4|A0A287AAR4_PIG	30096		0.1	HQGVMVGMGQKDSYVGDEAQSK	RT: 38.02
iNS15-R1-1_SW_RB1_01_8014	Actin beta OS=Sus scrofa OX=9823 GN=ACTB PE=3 SV=2	tr|A0A287AAR4|A0A287AAR4_PIG	17803		-2.1	HQGVMVGMGQKDSYVGDEAQSK	RT: 38.02
iNS15-R1-1_SW_RB1_01_8014	Actin beta OS=Sus scrofa OX=9823 GN=ACTB PE=3 SV=2	tr|A0A287AAR4|A0A287AAR4_PIG	60287		-1.2	KDLYANTVLSGGTTMYPGIADR	RT: 91.54
iNS15-R1-1_SW_RB1_01_8014	Actin beta OS=Sus scrofa OX=9823 GN=ACTB PE=3 SV=2	tr|A0A287AAR4|A0A287AAR4_PIG	37278		-5.2	KDLYANTVLSGGTTMYPGIADR	RT: 89.42
iNS15-R1-1_SW_RB1_01_8014	Actin beta OS=Sus scrofa OX=9823 GN=ACTB PE=3 SV=2	tr|A0A287AAR4|A0A287AAR4_PIG	19152		-2.3	LCYVALDFEQEMATAASSSSLEK	RT: 133.71
iNS15-R1-1_SW_RB1_01_8014	Actin beta OS=Sus scrofa OX=9823 GN=ACTB PE=3 SV=2	tr|A0A287AAR4|A0A287AAR4_PIG	16777		-2.3	LCYVALDFEQEMATAASSSSLEKSYELPDGQVITIGNER	RT: 154.15
iNS15-R1-1_SW_RB1_01_8014	Actin beta OS=Sus scrofa OX=9823 GN=ACTB PE=3 SV=2	tr|A0A287AAR4|A0A287AAR4_PIG	24757		-3.1	LDLAGRDLTDYLMK	RT: 107.94
iNS15-R1-1_SW_RB1_01_8014	Actin beta OS=Sus scrofa OX=9823 GN=ACTB PE=3 SV=2	tr|A0A287AAR4|A0A287AAR4_PIG	15656		1.9	LDLAGRDLTDYLMK	RT: 17.91
iNS15-R1-1_SW_RB1_01_8014	Actin beta OS=Sus scrofa OX=9823 GN=ACTB PE=3 SV=2	tr|A0A287AAR4|A0A287AAR4_PIG	9595		-5.9	MDDDIAALVVDNGSGMCK	RT: 29.32
iNS15-R1-1_SW_RB1_01_8014	Actin beta OS=Sus scrofa OX=9823 GN=ACTB PE=3 SV=2	tr|A0A287AAR4|A0A287AAR4_PIG	10735		0.1	MDDDIAALVVDNGSGMCKAGFAGDDAPR	RT: 108.91
iNS15-R1-1_SW_RB1_01_8014	Actin beta OS=Sus scrofa OX=9823 GN=ACTB PE=3 SV=2	tr|A0A287AAR4|A0A287AAR4_PIG	53865		-1.6	MDDDIAALVVDNGSGMCKAGFAGDDAPR	RT: 93.83
iNS15-R1-1_SW_RB1_01_8014	Actin beta OS=Sus scrofa OX=9823 GN=ACTB PE=3 SV=2	tr|A0A287AAR4|A0A287AAR4_PIG	2641		-2.9	MDDDIAALVVDNGSGMCKAGFAGDDAPR	RT: 93.83
iNS15-R1-1_SW_RB1_01_8014	Actin beta OS=Sus scrofa OX=9823 GN=ACTB PE=3 SV=2	tr|A0A287AAR4|A0A287AAR4_PIG	74461		-1.6	MDDDIAALVVDNGSGMCKAGFAGDDAPR	RT: 120.79
iNS15-R1-1_SW_RB1_01_8014	Actin beta OS=Sus scrofa OX=9823 GN=ACTB PE=3 SV=2	tr|A0A287AAR4|A0A287AAR4_PIG	27189		-0.1	MQKEITALAPSTMK	RT: 63.81
iNS15-R1-1_SW_RB1_01_8014	Actin beta OS=Sus scrofa OX=9823 GN=ACTB PE=3 SV=2	tr|A0A287AAR4|A0A287AAR4_PIG	29564		-0.3	MQKEITALAPSTMK	RT: 63.81
iNS15-R1-1_SW_RB1_01_8014	Actin beta OS=Sus scrofa OX=9823 GN=ACTB PE=3 SV=2	tr|A0A287AAR4|A0A287AAR4_PIG	54777		-4.1	MQKEITALAPSTMK	RT: 54.36
iNS15-R1-1_SW_RB1_01_8014	Actin beta OS=Sus scrofa OX=9823 GN=ACTB PE=3 SV=2	tr|A0A287AAR4|A0A287AAR4_PIG	52402		-4.3	MQKEITALAPSTMK	RT: 54.36
iNS15-R1-1_SW_RB1_01_8014	Actin beta OS=Sus scrofa OX=9823 GN=ACTB PE=3 SV=2	tr|A0A287AAR4|A0A287AAR4_PIG	50084		-1.6	MQKEITALAPSTMK	RT: 68.11
iNS15-R1-1_SW_RB1_01_8014	Actin beta OS=Sus scrofa OX=9823 GN=ACTB PE=3 SV=2	tr|A0A287AAR4|A0A287AAR4_PIG	948233		-7.9	MQKEITALAPSTMK	RT: 68.11
iNS15-R1-1_SW_RB1_01_8014	Actin beta OS=Sus scrofa OX=9823 GN=ACTB PE=3 SV=2	tr|A0A287AAR4|A0A287AAR4_PIG	44669		0.6	MQKEITALAPSTMK	RT: 56.45
iNS15-R1-1_SW_RB1_01_8014	Actin beta OS=Sus scrofa OX=9823 GN=ACTB PE=3 SV=2	tr|A0A287AAR4|A0A287AAR4_PIG	8759		2	MQKEITALAPSTMK	RT: 56.45
iNS15-R1-1_SW_RB1_01_8014	Actin beta OS=Sus scrofa OX=9823 GN=ACTB PE=3 SV=2	tr|A0A287AAR4|A0A287AAR4_PIG	22781		2.3	MTQIMFETFNTPAMYVAIQAVLSLYASGR	RT: 198.66
iNS15-R1-1_SW_RB1_01_8014	Actin beta OS=Sus scrofa OX=9823 GN=ACTB PE=3 SV=2	tr|A0A287AAR4|A0A287AAR4_PIG	12882		0.7	RGILTLK	RT: 40.11
iNS15-R1-1_SW_RB1_01_8014	Actin beta OS=Sus scrofa OX=9823 GN=ACTB PE=3 SV=2	tr|A0A287AAR4|A0A287AAR4_PIG	3914		1.4	SYELPDGQVITIGNER	RT: 71.04
iNS15-R1-1_SW_RB1_01_8014	Actin beta OS=Sus scrofa OX=9823 GN=ACTB PE=3 SV=2	tr|A0A287AAR4|A0A287AAR4_PIG	57817		-5.8	SYELPDGQVITIGNER	RT: 71.04
iNS15-R1-1_SW_RB1_01_8014	Actin beta OS=Sus scrofa OX=9823 GN=ACTB PE=3 SV=2	tr|A0A287AAR4|A0A287AAR4_PIG	15466		-2.9	SYELPDGQVITIGNERFR	RT: 92.51
iNS15-R1-1_SW_RB1_01_8014	Actin beta OS=Sus scrofa OX=9823 GN=ACTB PE=3 SV=2	tr|A0A287AAR4|A0A287AAR4_PIG	110200		-3.9	TTGIVMDSGDGVTHTVPIYEGYALPHAILR	RT: 117.39
iNS15-R1-1_SW_RB1_01_8014	Actin beta OS=Sus scrofa OX=9823 GN=ACTB PE=3 SV=2	tr|A0A287AAR4|A0A287AAR4_PIG	109098		-3.9	TTGIVMDSGDGVTHTVPIYEGYALPHAILR	RT: 117.39
iNS15-R1-1_SW_RB1_01_8014	Actin beta OS=Sus scrofa OX=9823 GN=ACTB PE=3 SV=2	tr|A0A287AAR4|A0A287AAR4_PIG	315913		-5.3	TTGIVMDSGDGVTHTVPIYEGYALPHAILR	RT: 69.09
iNS15-R1-1_SW_RB1_01_8014	Actin beta OS=Sus scrofa OX=9823 GN=ACTB PE=3 SV=2	tr|A0A287AAR4|A0A287AAR4_PIG	38057		-6	VAPEEHPVLLTEAPLNPK	RT: 83.19
iNS15-R1-1_SW_RB1_01_8014	Actin beta OS=Sus scrofa OX=9823 GN=ACTB PE=3 SV=2	tr|A0A287AAR4|A0A287AAR4_PIG	44327		-4.3	VAPEEHPVLLTEAPLNPK	RT: 83.19
iNS15-R1-1_SW_RB1_01_8014	Actin beta OS=Sus scrofa OX=9823 GN=ACTB PE=3 SV=2	tr|A0A287AAR4|A0A287AAR4_PIG	31768		1.1	VAPEEHPVLLTEAPLNPKANR	RT: 69.92
iNS15-R1-1_SW_RB1_01_8014	Actin beta OS=Sus scrofa OX=9823 GN=ACTB PE=3 SV=2	tr|A0A287AAR4|A0A287AAR4_PIG	139973		-5.3	VAPEEHPVLLTEAPLNPKANR	RT: 69.92
iNS15-R1-1_SW_RB1_01_8014	Actin beta OS=Sus scrofa OX=9823 GN=ACTB PE=3 SV=2	tr|A0A287AAR4|A0A287AAR4_PIG	46398		-3.2	YPIEHGIVTNWDDMEK	RT: 69.86
iNS15-R2-1_SW_RB6_01_8020	Actin beta OS=Sus scrofa OX=9823 GN=ACTB PE=3 SV=2	tr|A0A287AAR4|A0A287AAR4_PIG	40622		-2.7	AGFAGDDAPR	RT: 39.78
iNS15-R2-1_SW_RB6_01_8020	Actin beta OS=Sus scrofa OX=9823 GN=ACTB PE=3 SV=2	tr|A0A287AAR4|A0A287AAR4_PIG	5871		3.4	AGFAGDDAPRAVFPSIVGRPR	RT: 84.54
iNS15-R2-1_SW_RB6_01_8020	Actin beta OS=Sus scrofa OX=9823 GN=ACTB PE=3 SV=2	tr|A0A287AAR4|A0A287AAR4_PIG	6232		3.3	AGFAGDDAPRAVFPSIVGRPR	RT: 84.54
iNS15-R2-1_SW_RB6_01_8020	Actin beta OS=Sus scrofa OX=9823 GN=ACTB PE=3 SV=2	tr|A0A287AAR4|A0A287AAR4_PIG	5263		5.2	AVFPSIVGRPR	RT: 41.25
iNS15-R2-1_SW_RB6_01_8020	Actin beta OS=Sus scrofa OX=9823 GN=ACTB PE=3 SV=2	tr|A0A287AAR4|A0A287AAR4_PIG	5263		5.2	AVFPSIVGRPR	RT: 41.25
iNS15-R2-1_SW_RB6_01_8020	Actin beta OS=Sus scrofa OX=9823 GN=ACTB PE=3 SV=2	tr|A0A287AAR4|A0A287AAR4_PIG	4389		-4.9	CPEALFQPSFLGMESCGIHETTFNSIMK	RT: 132.8
iNS15-R2-1_SW_RB6_01_8020	Actin beta OS=Sus scrofa OX=9823 GN=ACTB PE=3 SV=2	tr|A0A287AAR4|A0A287AAR4_PIG	25859		4.5	DLTDYLMK	RT: 102.2
iNS15-R2-1_SW_RB6_01_8020	Actin beta OS=Sus scrofa OX=9823 GN=ACTB PE=3 SV=2	tr|A0A287AAR4|A0A287AAR4_PIG	11210		-1.2	DLTDYLMKILTER	RT: 72.43
iNS15-R2-1_SW_RB6_01_8020	Actin beta OS=Sus scrofa OX=9823 GN=ACTB PE=3 SV=2	tr|A0A287AAR4|A0A287AAR4_PIG	4674		-1	DLYANTVLSGGTTMYPGIADR	RT: 126.75
iNS15-R2-1_SW_RB6_01_8020	Actin beta OS=Sus scrofa OX=9823 GN=ACTB PE=3 SV=2	tr|A0A287AAR4|A0A287AAR4_PIG	37943		-1.3	DLYANTVLSGGTTMYPGIADR	RT: 126.75
iNS15-R2-1_SW_RB6_01_8020	Actin beta OS=Sus scrofa OX=9823 GN=ACTB PE=3 SV=2	tr|A0A287AAR4|A0A287AAR4_PIG	92986		2.4	DLYANTVLSGGTTMYPGIADR	RT: 112.01
iNS15-R2-1_SW_RB6_01_8020	Actin beta OS=Sus scrofa OX=9823 GN=ACTB PE=3 SV=2	tr|A0A287AAR4|A0A287AAR4_PIG	7961		1.3	DLYANTVLSGGTTMYPGIADR	RT: 112.01
iNS15-R2-1_SW_RB6_01_8020	Actin beta OS=Sus scrofa OX=9823 GN=ACTB PE=3 SV=2	tr|A0A287AAR4|A0A287AAR4_PIG	32281		4.3	DSYVGDEAQSK	RT: 37.49
iNS15-R2-1_SW_RB6_01_8020	Actin beta OS=Sus scrofa OX=9823 GN=ACTB PE=3 SV=2	tr|A0A287AAR4|A0A287AAR4_PIG	874		4	DSYVGDEAQSK	RT: 37.49
iNS15-R2-1_SW_RB6_01_8020	Actin beta OS=Sus scrofa OX=9823 GN=ACTB PE=3 SV=2	tr|A0A287AAR4|A0A287AAR4_PIG	191672		5.6	DSYVGDEAQSKR	RT: 93.79
iNS15-R2-1_SW_RB6_01_8020	Actin beta OS=Sus scrofa OX=9823 GN=ACTB PE=3 SV=2	tr|A0A287AAR4|A0A287AAR4_PIG	192014		5.7	DSYVGDEAQSKR	RT: 93.79
iNS15-R2-1_SW_RB6_01_8020	Actin beta OS=Sus scrofa OX=9823 GN=ACTB PE=3 SV=2	tr|A0A287AAR4|A0A287AAR4_PIG	2166		2.5	EITALAPSTMK	RT: 71.92
iNS15-R2-1_SW_RB6_01_8020	Actin beta OS=Sus scrofa OX=9823 GN=ACTB PE=3 SV=2	tr|A0A287AAR4|A0A287AAR4_PIG	15352		2.4	EITALAPSTMK	RT: 43.82
iNS15-R2-1_SW_RB6_01_8020	Actin beta OS=Sus scrofa OX=9823 GN=ACTB PE=3 SV=2	tr|A0A287AAR4|A0A287AAR4_PIG	6099		5.4	EITALAPSTMKIK	RT: 77.65
iNS15-R2-1_SW_RB6_01_8020	Actin beta OS=Sus scrofa OX=9823 GN=ACTB PE=3 SV=2	tr|A0A287AAR4|A0A287AAR4_PIG	5092		2.7	EITALAPSTMKIK	RT: 77.65
iNS15-R2-1_SW_RB6_01_8020	Actin beta OS=Sus scrofa OX=9823 GN=ACTB PE=3 SV=2	tr|A0A287AAR4|A0A287AAR4_PIG	9348		-4.1	EITALAPSTMKIK	RT: 108.11
iNS15-R2-1_SW_RB6_01_8020	Actin beta OS=Sus scrofa OX=9823 GN=ACTB PE=3 SV=2	tr|A0A287AAR4|A0A287AAR4_PIG	9937		0	EKLCYVALDFEQEMATAASSSSLEK	RT: 126.97
iNS15-R2-1_SW_RB6_01_8020	Actin beta OS=Sus scrofa OX=9823 GN=ACTB PE=3 SV=2	tr|A0A287AAR4|A0A287AAR4_PIG	1007		-0.6	EKMTQIMFETFNTPAMYVAIQAVLSLYASGR	RT: 192.4
iNS15-R2-1_SW_RB6_01_8020	Actin beta OS=Sus scrofa OX=9823 GN=ACTB PE=3 SV=2	tr|A0A287AAR4|A0A287AAR4_PIG	3382		1.5	FRCPEALFQPSFLGMESCGIHETTFNSIMK	RT: 128.22
iNS15-R2-1_SW_RB6_01_8020	Actin beta OS=Sus scrofa OX=9823 GN=ACTB PE=3 SV=2	tr|A0A287AAR4|A0A287AAR4_PIG	6270		0.6	FRCPEALFQPSFLGMESCGIHETTFNSIMK	RT: 123.21
iNS15-R2-1_SW_RB6_01_8020	Actin beta OS=Sus scrofa OX=9823 GN=ACTB PE=3 SV=2	tr|A0A287AAR4|A0A287AAR4_PIG	4655		-2.2	FRCPEALFQPSFLGMESCGIHETTFNSIMK	RT: 126.28
iNS15-R2-1_SW_RB6_01_8020	Actin beta OS=Sus scrofa OX=9823 GN=ACTB PE=3 SV=2	tr|A0A287AAR4|A0A287AAR4_PIG	11495		-3.7	GYSFTTTAER	RT: 50.6
iNS15-R2-1_SW_RB6_01_8020	Actin beta OS=Sus scrofa OX=9823 GN=ACTB PE=3 SV=2	tr|A0A287AAR4|A0A287AAR4_PIG	11761		-1.1	GYSFTTTAEREIVR	RT: 72.43
iNS15-R2-1_SW_RB6_01_8020	Actin beta OS=Sus scrofa OX=9823 GN=ACTB PE=3 SV=2	tr|A0A287AAR4|A0A287AAR4_PIG	5415		3.5	HQGVMVGMGQK	RT: 36.25
iNS15-R2-1_SW_RB6_01_8020	Actin beta OS=Sus scrofa OX=9823 GN=ACTB PE=3 SV=2	tr|A0A287AAR4|A0A287AAR4_PIG	6517		2.9	HQGVMVGMGQK	RT: 33.75
iNS15-R2-1_SW_RB6_01_8020	Actin beta OS=Sus scrofa OX=9823 GN=ACTB PE=3 SV=2	tr|A0A287AAR4|A0A287AAR4_PIG	3781		-4.3	HQGVMVGMGQK	RT: 34.85
iNS15-R2-1_SW_RB6_01_8020	Actin beta OS=Sus scrofa OX=9823 GN=ACTB PE=3 SV=2	tr|A0A287AAR4|A0A287AAR4_PIG	323		-5.8	HQGVMVGMGQK	RT: 29.27
iNS15-R2-1_SW_RB6_01_8020	Actin beta OS=Sus scrofa OX=9823 GN=ACTB PE=3 SV=2	tr|A0A287AAR4|A0A287AAR4_PIG	14288		0.7	HQGVMVGMGQK	RT: 29.27
iNS15-R2-1_SW_RB6_01_8020	Actin beta OS=Sus scrofa OX=9823 GN=ACTB PE=3 SV=2	tr|A0A287AAR4|A0A287AAR4_PIG	257653		3.1	HQGVMVGMGQKDSYVGDEAQSK	RT: 54.07
iNS15-R2-1_SW_RB6_01_8020	Actin beta OS=Sus scrofa OX=9823 GN=ACTB PE=3 SV=2	tr|A0A287AAR4|A0A287AAR4_PIG	8512		-0.1	HQGVMVGMGQKDSYVGDEAQSK	RT: 54.07
iNS15-R2-1_SW_RB6_01_8020	Actin beta OS=Sus scrofa OX=9823 GN=ACTB PE=3 SV=2	tr|A0A287AAR4|A0A287AAR4_PIG	7581		-1.7	HQGVMVGMGQKDSYVGDEAQSK	RT: 37.43
iNS15-R2-1_SW_RB6_01_8020	Actin beta OS=Sus scrofa OX=9823 GN=ACTB PE=3 SV=2	tr|A0A287AAR4|A0A287AAR4_PIG	6517		-2.2	HQGVMVGMGQKDSYVGDEAQSK	RT: 37.43
iNS15-R2-1_SW_RB6_01_8020	Actin beta OS=Sus scrofa OX=9823 GN=ACTB PE=3 SV=2	tr|A0A287AAR4|A0A287AAR4_PIG	11248		1.7	HQGVMVGMGQKDSYVGDEAQSK	RT: 37.28
iNS15-R2-1_SW_RB6_01_8020	Actin beta OS=Sus scrofa OX=9823 GN=ACTB PE=3 SV=2	tr|A0A287AAR4|A0A287AAR4_PIG	10564		1.8	HQGVMVGMGQKDSYVGDEAQSK	RT: 37.28
iNS15-R2-1_SW_RB6_01_8020	Actin beta OS=Sus scrofa OX=9823 GN=ACTB PE=3 SV=2	tr|A0A287AAR4|A0A287AAR4_PIG	37639		3.7	HQGVMVGMGQKDSYVGDEAQSK	RT: 37.35
iNS15-R2-1_SW_RB6_01_8020	Actin beta OS=Sus scrofa OX=9823 GN=ACTB PE=3 SV=2	tr|A0A287AAR4|A0A287AAR4_PIG	38684		3.7	HQGVMVGMGQKDSYVGDEAQSK	RT: 37.35
iNS15-R2-1_SW_RB6_01_8020	Actin beta OS=Sus scrofa OX=9823 GN=ACTB PE=3 SV=2	tr|A0A287AAR4|A0A287AAR4_PIG	50901		4	KDLYANTVLSGGTTMYPGIADR	RT: 102.42
iNS15-R2-1_SW_RB6_01_8020	Actin beta OS=Sus scrofa OX=9823 GN=ACTB PE=3 SV=2	tr|A0A287AAR4|A0A287AAR4_PIG	119377		-0.9	KDLYANTVLSGGTTMYPGIADR	RT: 89.48
iNS15-R2-1_SW_RB6_01_8020	Actin beta OS=Sus scrofa OX=9823 GN=ACTB PE=3 SV=2	tr|A0A287AAR4|A0A287AAR4_PIG	13148		2.1	LCYVALDFEQEMATAASSSSLEK	RT: 131.96
iNS15-R2-1_SW_RB6_01_8020	Actin beta OS=Sus scrofa OX=9823 GN=ACTB PE=3 SV=2	tr|A0A287AAR4|A0A287AAR4_PIG	2546		0	LCYVALDFEQEMATAASSSSLEKSYELPDGQVITIGNER	RT: 151.08
iNS15-R2-1_SW_RB6_01_8020	Actin beta OS=Sus scrofa OX=9823 GN=ACTB PE=3 SV=2	tr|A0A287AAR4|A0A287AAR4_PIG	20976		5.9	LDLAGRDLTDYLMK	RT: 106.52
iNS15-R2-1_SW_RB6_01_8020	Actin beta OS=Sus scrofa OX=9823 GN=ACTB PE=3 SV=2	tr|A0A287AAR4|A0A287AAR4_PIG	798		-2.1	LDLAGRDLTDYLMK	RT: 17.66
iNS15-R2-1_SW_RB6_01_8020	Actin beta OS=Sus scrofa OX=9823 GN=ACTB PE=3 SV=2	tr|A0A287AAR4|A0A287AAR4_PIG	817		-3.8	MDDDIAALVVDNGSGMCK	RT: 25.45
iNS15-R2-1_SW_RB6_01_8020	Actin beta OS=Sus scrofa OX=9823 GN=ACTB PE=3 SV=2	tr|A0A287AAR4|A0A287AAR4_PIG	9918		-4	MDDDIAALVVDNGSGMCKAGFAGDDAPR	RT: 104.17
iNS15-R2-1_SW_RB6_01_8020	Actin beta OS=Sus scrofa OX=9823 GN=ACTB PE=3 SV=2	tr|A0A287AAR4|A0A287AAR4_PIG	5377		-1.6	MDDDIAALVVDNGSGMCKAGFAGDDAPR	RT: 105.33
iNS15-R2-1_SW_RB6_01_8020	Actin beta OS=Sus scrofa OX=9823 GN=ACTB PE=3 SV=2	tr|A0A287AAR4|A0A287AAR4_PIG	133969		0.5	MDDDIAALVVDNGSGMCKAGFAGDDAPR	RT: 105.33
iNS15-R2-1_SW_RB6_01_8020	Actin beta OS=Sus scrofa OX=9823 GN=ACTB PE=3 SV=2	tr|A0A287AAR4|A0A287AAR4_PIG	30400		1.8	MDDDIAALVVDNGSGMCKAGFAGDDAPR	RT: 100.54
iNS15-R2-1_SW_RB6_01_8020	Actin beta OS=Sus scrofa OX=9823 GN=ACTB PE=3 SV=2	tr|A0A287AAR4|A0A287AAR4_PIG	4617		1.4	MQKEITALAPSTMK	RT: 72.44
iNS15-R2-1_SW_RB6_01_8020	Actin beta OS=Sus scrofa OX=9823 GN=ACTB PE=3 SV=2	tr|A0A287AAR4|A0A287AAR4_PIG	4313		1.1	MQKEITALAPSTMK	RT: 72.44
iNS15-R2-1_SW_RB6_01_8020	Actin beta OS=Sus scrofa OX=9823 GN=ACTB PE=3 SV=2	tr|A0A287AAR4|A0A287AAR4_PIG	323		-3.2	MQKEITALAPSTMK	RT: 60.01
iNS15-R2-1_SW_RB6_01_8020	Actin beta OS=Sus scrofa OX=9823 GN=ACTB PE=3 SV=2	tr|A0A287AAR4|A0A287AAR4_PIG	70687		-1.8	MQKEITALAPSTMK	RT: 60.01
iNS15-R2-1_SW_RB6_01_8020	Actin beta OS=Sus scrofa OX=9823 GN=ACTB PE=3 SV=2	tr|A0A287AAR4|A0A287AAR4_PIG	25859		-4	MQKEITALAPSTMK	RT: 93.72
iNS15-R2-1_SW_RB6_01_8020	Actin beta OS=Sus scrofa OX=9823 GN=ACTB PE=3 SV=2	tr|A0A287AAR4|A0A287AAR4_PIG	33516		-3.5	MQKEITALAPSTMK	RT: 93.72
iNS15-R2-1_SW_RB6_01_8020	Actin beta OS=Sus scrofa OX=9823 GN=ACTB PE=3 SV=2	tr|A0A287AAR4|A0A287AAR4_PIG	3021		1.3	MQKEITALAPSTMK	RT: 41.6
iNS15-R2-1_SW_RB6_01_8020	Actin beta OS=Sus scrofa OX=9823 GN=ACTB PE=3 SV=2	tr|A0A287AAR4|A0A287AAR4_PIG	4579		0	MQKEITALAPSTMK	RT: 41.6
iNS15-R2-1_SW_RB6_01_8020	Actin beta OS=Sus scrofa OX=9823 GN=ACTB PE=3 SV=2	tr|A0A287AAR4|A0A287AAR4_PIG	855		-2.3	MTQIMFETFNTPAMYVAIQAVLSLYASGR	RT: 202.33
iNS15-R2-1_SW_RB6_01_8020	Actin beta OS=Sus scrofa OX=9823 GN=ACTB PE=3 SV=2	tr|A0A287AAR4|A0A287AAR4_PIG	4123		-2.7	RGILTLK	RT: 39.37
iNS15-R2-1_SW_RB6_01_8020	Actin beta OS=Sus scrofa OX=9823 GN=ACTB PE=3 SV=2	tr|A0A287AAR4|A0A287AAR4_PIG	19304		0.7	SYELPDGQVITIGNER	RT: 102
iNS15-R2-1_SW_RB6_01_8020	Actin beta OS=Sus scrofa OX=9823 GN=ACTB PE=3 SV=2	tr|A0A287AAR4|A0A287AAR4_PIG	19304		0.7	SYELPDGQVITIGNER	RT: 102
iNS15-R2-1_SW_RB6_01_8020	Actin beta OS=Sus scrofa OX=9823 GN=ACTB PE=3 SV=2	tr|A0A287AAR4|A0A287AAR4_PIG	15010		3.9	SYELPDGQVITIGNERFR	RT: 100.54
iNS15-R2-1_SW_RB6_01_8020	Actin beta OS=Sus scrofa OX=9823 GN=ACTB PE=3 SV=2	tr|A0A287AAR4|A0A287AAR4_PIG	48507		-1.6	TTGIVMDSGDGVTHTVPIYEGYALPHAILR	RT: 118.05
iNS15-R2-1_SW_RB6_01_8020	Actin beta OS=Sus scrofa OX=9823 GN=ACTB PE=3 SV=2	tr|A0A287AAR4|A0A287AAR4_PIG	54131		-1.1	TTGIVMDSGDGVTHTVPIYEGYALPHAILR	RT: 118.05
iNS15-R2-1_SW_RB6_01_8020	Actin beta OS=Sus scrofa OX=9823 GN=ACTB PE=3 SV=2	tr|A0A287AAR4|A0A287AAR4_PIG	64353		-1.6	TTGIVMDSGDGVTHTVPIYEGYALPHAILR	RT: 118.05
iNS15-R2-1_SW_RB6_01_8020	Actin beta OS=Sus scrofa OX=9823 GN=ACTB PE=3 SV=2	tr|A0A287AAR4|A0A287AAR4_PIG	13661		0.7	VAPEEHPVLLTEAPLNPK	RT: 85.51
iNS15-R2-1_SW_RB6_01_8020	Actin beta OS=Sus scrofa OX=9823 GN=ACTB PE=3 SV=2	tr|A0A287AAR4|A0A287AAR4_PIG	18696		0.3	VAPEEHPVLLTEAPLNPK	RT: 85.51
iNS15-R2-1_SW_RB6_01_8020	Actin beta OS=Sus scrofa OX=9823 GN=ACTB PE=3 SV=2	tr|A0A287AAR4|A0A287AAR4_PIG	9386		-0.5	VAPEEHPVLLTEAPLNPKANR	RT: 89.27
iNS15-R2-1_SW_RB6_01_8020	Actin beta OS=Sus scrofa OX=9823 GN=ACTB PE=3 SV=2	tr|A0A287AAR4|A0A287AAR4_PIG	52915		3	VAPEEHPVLLTEAPLNPKANR	RT: 89.27
iNS15-R2-1_SW_RB6_01_8020	Actin beta OS=Sus scrofa OX=9823 GN=ACTB PE=3 SV=2	tr|A0A287AAR4|A0A287AAR4_PIG	4750		1.4	YPIEHGIVTNWDDMEK	RT: 72.44
iNS15-R3-1_SW_RC3_01_8032	Actin beta OS=Sus scrofa OX=9823 GN=ACTB PE=3 SV=2	tr|A0A287AAR4|A0A287AAR4_PIG	1673159		-6.6	AGFAGDDAPR	RT: 64.84
iNS15-R3-1_SW_RC3_01_8032	Actin beta OS=Sus scrofa OX=9823 GN=ACTB PE=3 SV=2	tr|A0A287AAR4|A0A287AAR4_PIG	31673		-2	AGFAGDDAPRAVFPSIVGRPR	RT: 81.25
iNS15-R3-1_SW_RC3_01_8032	Actin beta OS=Sus scrofa OX=9823 GN=ACTB PE=3 SV=2	tr|A0A287AAR4|A0A287AAR4_PIG	32205		-2	AGFAGDDAPRAVFPSIVGRPR	RT: 81.25
iNS15-R3-1_SW_RC3_01_8032	Actin beta OS=Sus scrofa OX=9823 GN=ACTB PE=3 SV=2	tr|A0A287AAR4|A0A287AAR4_PIG	4449192		-5.7	AVFPSIVGRPR	RT: 64.35
iNS15-R3-1_SW_RC3_01_8032	Actin beta OS=Sus scrofa OX=9823 GN=ACTB PE=3 SV=2	tr|A0A287AAR4|A0A287AAR4_PIG	4453106		-5.7	AVFPSIVGRPR	RT: 64.35
iNS15-R3-1_SW_RC3_01_8032	Actin beta OS=Sus scrofa OX=9823 GN=ACTB PE=3 SV=2	tr|A0A287AAR4|A0A287AAR4_PIG	13813		3	CPEALFQPSFLGMESCGIHETTFNSIMK	RT: 138.17
iNS15-R3-1_SW_RC3_01_8032	Actin beta OS=Sus scrofa OX=9823 GN=ACTB PE=3 SV=2	tr|A0A287AAR4|A0A287AAR4_PIG	66386		-1.3	DLTDYLMK	RT: 100.63
iNS15-R3-1_SW_RC3_01_8032	Actin beta OS=Sus scrofa OX=9823 GN=ACTB PE=3 SV=2	tr|A0A287AAR4|A0A287AAR4_PIG	223915		5.1	DLTDYLMKILTER	RT: 76.86
iNS15-R3-1_SW_RC3_01_8032	Actin beta OS=Sus scrofa OX=9823 GN=ACTB PE=3 SV=2	tr|A0A287AAR4|A0A287AAR4_PIG	8626		-3.1	DLYANTVLSGGTTMYPGIADR	RT: 125.37
iNS15-R3-1_SW_RC3_01_8032	Actin beta OS=Sus scrofa OX=9823 GN=ACTB PE=3 SV=2	tr|A0A287AAR4|A0A287AAR4_PIG	101593		1.7	DLYANTVLSGGTTMYPGIADR	RT: 125.37
iNS15-R3-1_SW_RC3_01_8032	Actin beta OS=Sus scrofa OX=9823 GN=ACTB PE=3 SV=2	tr|A0A287AAR4|A0A287AAR4_PIG	311410		3.2	DLYANTVLSGGTTMYPGIADR	RT: 87.43
iNS15-R3-1_SW_RC3_01_8032	Actin beta OS=Sus scrofa OX=9823 GN=ACTB PE=3 SV=2	tr|A0A287AAR4|A0A287AAR4_PIG	23883		-0.9	DLYANTVLSGGTTMYPGIADR	RT: 87.43
iNS15-R3-1_SW_RC3_01_8032	Actin beta OS=Sus scrofa OX=9823 GN=ACTB PE=3 SV=2	tr|A0A287AAR4|A0A287AAR4_PIG	927808		5.4	DSYVGDEAQSK	RT: 45.67
iNS15-R3-1_SW_RC3_01_8032	Actin beta OS=Sus scrofa OX=9823 GN=ACTB PE=3 SV=2	tr|A0A287AAR4|A0A287AAR4_PIG	6137		3.2	DSYVGDEAQSK	RT: 45.67
iNS15-R3-1_SW_RC3_01_8032	Actin beta OS=Sus scrofa OX=9823 GN=ACTB PE=3 SV=2	tr|A0A287AAR4|A0A287AAR4_PIG	393889		8.2	DSYVGDEAQSKR	RT: 17.77
iNS15-R3-1_SW_RC3_01_8032	Actin beta OS=Sus scrofa OX=9823 GN=ACTB PE=3 SV=2	tr|A0A287AAR4|A0A287AAR4_PIG	372932		8.7	DSYVGDEAQSKR	RT: 17.77
iNS15-R3-1_SW_RC3_01_8032	Actin beta OS=Sus scrofa OX=9823 GN=ACTB PE=3 SV=2	tr|A0A287AAR4|A0A287AAR4_PIG	1015170		1.4	EITALAPSTMK	RT: 68.45
iNS15-R3-1_SW_RC3_01_8032	Actin beta OS=Sus scrofa OX=9823 GN=ACTB PE=3 SV=2	tr|A0A287AAR4|A0A287AAR4_PIG	1622467		3.6	EITALAPSTMK	RT: 68.25
iNS15-R3-1_SW_RC3_01_8032	Actin beta OS=Sus scrofa OX=9823 GN=ACTB PE=3 SV=2	tr|A0A287AAR4|A0A287AAR4_PIG	27531		-0.5	EITALAPSTMKIK	RT: 74.37
iNS15-R3-1_SW_RC3_01_8032	Actin beta OS=Sus scrofa OX=9823 GN=ACTB PE=3 SV=2	tr|A0A287AAR4|A0A287AAR4_PIG	277533		1.8	EITALAPSTMKIK	RT: 74.37
iNS15-R3-1_SW_RC3_01_8032	Actin beta OS=Sus scrofa OX=9823 GN=ACTB PE=3 SV=2	tr|A0A287AAR4|A0A287AAR4_PIG	20558		-2.3	EITALAPSTMKIK	RT: 87.35
iNS15-R3-1_SW_RC3_01_8032	Actin beta OS=Sus scrofa OX=9823 GN=ACTB PE=3 SV=2	tr|A0A287AAR4|A0A287AAR4_PIG	61389		-1.5	EKLCYVALDFEQEMATAASSSSLEK	RT: 120.93
iNS15-R3-1_SW_RC3_01_8032	Actin beta OS=Sus scrofa OX=9823 GN=ACTB PE=3 SV=2	tr|A0A287AAR4|A0A287AAR4_PIG	3306		0.4	EKMTQIMFETFNTPAMYVAIQAVLSLYASGR	RT: 197.09
iNS15-R3-1_SW_RC3_01_8032	Actin beta OS=Sus scrofa OX=9823 GN=ACTB PE=3 SV=2	tr|A0A287AAR4|A0A287AAR4_PIG	10165		-2	FRCPEALFQPSFLGMESCGIHETTFNSIMK	RT: 129.55
iNS15-R3-1_SW_RC3_01_8032	Actin beta OS=Sus scrofa OX=9823 GN=ACTB PE=3 SV=2	tr|A0A287AAR4|A0A287AAR4_PIG	19076		-5.1	FRCPEALFQPSFLGMESCGIHETTFNSIMK	RT: 119.55
iNS15-R3-1_SW_RC3_01_8032	Actin beta OS=Sus scrofa OX=9823 GN=ACTB PE=3 SV=2	tr|A0A287AAR4|A0A287AAR4_PIG	5320		3.4	FRCPEALFQPSFLGMESCGIHETTFNSIMK	RT: 121.7
iNS15-R3-1_SW_RC3_01_8032	Actin beta OS=Sus scrofa OX=9823 GN=ACTB PE=3 SV=2	tr|A0A287AAR4|A0A287AAR4_PIG	543970		7.5	GYSFTTTAER	RT: 54
iNS15-R3-1_SW_RC3_01_8032	Actin beta OS=Sus scrofa OX=9823 GN=ACTB PE=3 SV=2	tr|A0A287AAR4|A0A287AAR4_PIG	356364		7.2	GYSFTTTAEREIVR	RT: 72
iNS15-R3-1_SW_RC3_01_8032	Actin beta OS=Sus scrofa OX=9823 GN=ACTB PE=3 SV=2	tr|A0A287AAR4|A0A287AAR4_PIG	803966		-1.9	HQGVMVGMGQK	RT: 17.7
iNS15-R3-1_SW_RC3_01_8032	Actin beta OS=Sus scrofa OX=9823 GN=ACTB PE=3 SV=2	tr|A0A287AAR4|A0A287AAR4_PIG	239571		-2.3	HQGVMVGMGQK	RT: 46.01
iNS15-R3-1_SW_RC3_01_8032	Actin beta OS=Sus scrofa OX=9823 GN=ACTB PE=3 SV=2	tr|A0A287AAR4|A0A287AAR4_PIG	344470		-1.4	HQGVMVGMGQK	RT: 53.1
iNS15-R3-1_SW_RC3_01_8032	Actin beta OS=Sus scrofa OX=9823 GN=ACTB PE=3 SV=2	tr|A0A287AAR4|A0A287AAR4_PIG	267691		-3.4	HQGVMVGMGQK	RT: 17.77
iNS15-R3-1_SW_RC3_01_8032	Actin beta OS=Sus scrofa OX=9823 GN=ACTB PE=3 SV=2	tr|A0A287AAR4|A0A287AAR4_PIG	868414		0.6	HQGVMVGMGQK	RT: 17.77
iNS15-R3-1_SW_RC3_01_8032	Actin beta OS=Sus scrofa OX=9823 GN=ACTB PE=3 SV=2	tr|A0A287AAR4|A0A287AAR4_PIG	419938		4.1	HQGVMVGMGQKDSYVGDEAQSK	RT: 45.8
iNS15-R3-1_SW_RC3_01_8032	Actin beta OS=Sus scrofa OX=9823 GN=ACTB PE=3 SV=2	tr|A0A287AAR4|A0A287AAR4_PIG	475722		3.6	HQGVMVGMGQKDSYVGDEAQSK	RT: 45.8
iNS15-R3-1_SW_RC3_01_8032	Actin beta OS=Sus scrofa OX=9823 GN=ACTB PE=3 SV=2	tr|A0A287AAR4|A0A287AAR4_PIG	386954		3.2	HQGVMVGMGQKDSYVGDEAQSK	RT: 45.39
iNS15-R3-1_SW_RC3_01_8032	Actin beta OS=Sus scrofa OX=9823 GN=ACTB PE=3 SV=2	tr|A0A287AAR4|A0A287AAR4_PIG	385947		3.2	HQGVMVGMGQKDSYVGDEAQSK	RT: 45.39
iNS15-R3-1_SW_RC3_01_8032	Actin beta OS=Sus scrofa OX=9823 GN=ACTB PE=3 SV=2	tr|A0A287AAR4|A0A287AAR4_PIG	238773		6.2	HQGVMVGMGQKDSYVGDEAQSK	RT: 45.39
iNS15-R3-1_SW_RC3_01_8032	Actin beta OS=Sus scrofa OX=9823 GN=ACTB PE=3 SV=2	tr|A0A287AAR4|A0A287AAR4_PIG	272669		5.4	HQGVMVGMGQKDSYVGDEAQSK	RT: 45.39
iNS15-R3-1_SW_RC3_01_8032	Actin beta OS=Sus scrofa OX=9823 GN=ACTB PE=3 SV=2	tr|A0A287AAR4|A0A287AAR4_PIG	1371268		5.1	HQGVMVGMGQKDSYVGDEAQSK	RT: 45.67
iNS15-R3-1_SW_RC3_01_8032	Actin beta OS=Sus scrofa OX=9823 GN=ACTB PE=3 SV=2	tr|A0A287AAR4|A0A287AAR4_PIG	1634285		4.4	HQGVMVGMGQKDSYVGDEAQSK	RT: 45.67
iNS15-R3-1_SW_RC3_01_8032	Actin beta OS=Sus scrofa OX=9823 GN=ACTB PE=3 SV=2	tr|A0A287AAR4|A0A287AAR4_PIG	117230		4.2	KDLYANTVLSGGTTMYPGIADR	RT: 100.29
iNS15-R3-1_SW_RC3_01_8032	Actin beta OS=Sus scrofa OX=9823 GN=ACTB PE=3 SV=2	tr|A0A287AAR4|A0A287AAR4_PIG	160740		-0.3	KDLYANTVLSGGTTMYPGIADR	RT: 89.17
iNS15-R3-1_SW_RC3_01_8032	Actin beta OS=Sus scrofa OX=9823 GN=ACTB PE=3 SV=2	tr|A0A287AAR4|A0A287AAR4_PIG	20634		-0.8	LCYVALDFEQEMATAASSSSLEK	RT: 135.37
iNS15-R3-1_SW_RC3_01_8032	Actin beta OS=Sus scrofa OX=9823 GN=ACTB PE=3 SV=2	tr|A0A287AAR4|A0A287AAR4_PIG	10697		-5.5	LCYVALDFEQEMATAASSSSLEKSYELPDGQVITIGNER	RT: 160.25
iNS15-R3-1_SW_RC3_01_8032	Actin beta OS=Sus scrofa OX=9823 GN=ACTB PE=3 SV=2	tr|A0A287AAR4|A0A287AAR4_PIG	84930		1.9	LDLAGRDLTDYLMK	RT: 108.2
iNS15-R3-1_SW_RC3_01_8032	Actin beta OS=Sus scrofa OX=9823 GN=ACTB PE=3 SV=2	tr|A0A287AAR4|A0A287AAR4_PIG	130853		1.7	LDLAGRDLTDYLMK	RT: 17.7
iNS15-R3-1_SW_RC3_01_8032	Actin beta OS=Sus scrofa OX=9823 GN=ACTB PE=3 SV=2	tr|A0A287AAR4|A0A287AAR4_PIG	15808		-2.5	MDDDIAALVVDNGSGMCK	RT: 29.24
iNS15-R3-1_SW_RC3_01_8032	Actin beta OS=Sus scrofa OX=9823 GN=ACTB PE=3 SV=2	tr|A0A287AAR4|A0A287AAR4_PIG	20444		5	MDDDIAALVVDNGSGMCKAGFAGDDAPR	RT: 108.48
iNS15-R3-1_SW_RC3_01_8032	Actin beta OS=Sus scrofa OX=9823 GN=ACTB PE=3 SV=2	tr|A0A287AAR4|A0A287AAR4_PIG	79515		-1.8	MDDDIAALVVDNGSGMCKAGFAGDDAPR	RT: 64.84
iNS15-R3-1_SW_RC3_01_8032	Actin beta OS=Sus scrofa OX=9823 GN=ACTB PE=3 SV=2	tr|A0A287AAR4|A0A287AAR4_PIG	1543104		-7.2	MDDDIAALVVDNGSGMCKAGFAGDDAPR	RT: 64.84
iNS15-R3-1_SW_RC3_01_8032	Actin beta OS=Sus scrofa OX=9823 GN=ACTB PE=3 SV=2	tr|A0A287AAR4|A0A287AAR4_PIG	37145		2.7	MDDDIAALVVDNGSGMCKAGFAGDDAPR	RT: 101.19
iNS15-R3-1_SW_RC3_01_8032	Actin beta OS=Sus scrofa OX=9823 GN=ACTB PE=3 SV=2	tr|A0A287AAR4|A0A287AAR4_PIG	59793		-2	MQKEITALAPSTMK	RT: 62.28
iNS15-R3-1_SW_RC3_01_8032	Actin beta OS=Sus scrofa OX=9823 GN=ACTB PE=3 SV=2	tr|A0A287AAR4|A0A287AAR4_PIG	63156		-2.7	MQKEITALAPSTMK	RT: 62.28
iNS15-R3-1_SW_RC3_01_8032	Actin beta OS=Sus scrofa OX=9823 GN=ACTB PE=3 SV=2	tr|A0A287AAR4|A0A287AAR4_PIG	192869		2.9	MQKEITALAPSTMK	RT: 56.23
iNS15-R3-1_SW_RC3_01_8032	Actin beta OS=Sus scrofa OX=9823 GN=ACTB PE=3 SV=2	tr|A0A287AAR4|A0A287AAR4_PIG	47500		-0.3	MQKEITALAPSTMK	RT: 56.23
iNS15-R3-1_SW_RC3_01_8032	Actin beta OS=Sus scrofa OX=9823 GN=ACTB PE=3 SV=2	tr|A0A287AAR4|A0A287AAR4_PIG	48222		-1	MQKEITALAPSTMK	RT: 54
iNS15-R3-1_SW_RC3_01_8032	Actin beta OS=Sus scrofa OX=9823 GN=ACTB PE=3 SV=2	tr|A0A287AAR4|A0A287AAR4_PIG	157187		2.7	MQKEITALAPSTMK	RT: 54
iNS15-R3-1_SW_RC3_01_8032	Actin beta OS=Sus scrofa OX=9823 GN=ACTB PE=3 SV=2	tr|A0A287AAR4|A0A287AAR4_PIG	12825		-2.3	MQKEITALAPSTMK	RT: 55.32
iNS15-R3-1_SW_RC3_01_8032	Actin beta OS=Sus scrofa OX=9823 GN=ACTB PE=3 SV=2	tr|A0A287AAR4|A0A287AAR4_PIG	142899		-2.3	MQKEITALAPSTMK	RT: 55.32
iNS15-R3-1_SW_RC3_01_8032	Actin beta OS=Sus scrofa OX=9823 GN=ACTB PE=3 SV=2	tr|A0A287AAR4|A0A287AAR4_PIG	6061		2	MTQIMFETFNTPAMYVAIQAVLSLYASGR	RT: 201.79
iNS15-R3-1_SW_RC3_01_8032	Actin beta OS=Sus scrofa OX=9823 GN=ACTB PE=3 SV=2	tr|A0A287AAR4|A0A287AAR4_PIG	51775		-0.3	RGILTLK	RT: 39.53
iNS15-R3-1_SW_RC3_01_8032	Actin beta OS=Sus scrofa OX=9823 GN=ACTB PE=3 SV=2	tr|A0A287AAR4|A0A287AAR4_PIG	150917		0.2	SYELPDGQVITIGNER	RT: 81.74
iNS15-R3-1_SW_RC3_01_8032	Actin beta OS=Sus scrofa OX=9823 GN=ACTB PE=3 SV=2	tr|A0A287AAR4|A0A287AAR4_PIG	150366		0.2	SYELPDGQVITIGNER	RT: 81.74
iNS15-R3-1_SW_RC3_01_8032	Actin beta OS=Sus scrofa OX=9823 GN=ACTB PE=3 SV=2	tr|A0A287AAR4|A0A287AAR4_PIG	43833		-1	SYELPDGQVITIGNERFR	RT: 100.77
iNS15-R3-1_SW_RC3_01_8032	Actin beta OS=Sus scrofa OX=9823 GN=ACTB PE=3 SV=2	tr|A0A287AAR4|A0A287AAR4_PIG	111188		2.4	TTGIVMDSGDGVTHTVPIYEGYALPHAILR	RT: 111.96
iNS15-R3-1_SW_RC3_01_8032	Actin beta OS=Sus scrofa OX=9823 GN=ACTB PE=3 SV=2	tr|A0A287AAR4|A0A287AAR4_PIG	111815		2.4	TTGIVMDSGDGVTHTVPIYEGYALPHAILR	RT: 111.96
iNS15-R3-1_SW_RC3_01_8032	Actin beta OS=Sus scrofa OX=9823 GN=ACTB PE=3 SV=2	tr|A0A287AAR4|A0A287AAR4_PIG	483740		8	TTGIVMDSGDGVTHTVPIYEGYALPHAILR	RT: 54
iNS15-R3-1_SW_RC3_01_8032	Actin beta OS=Sus scrofa OX=9823 GN=ACTB PE=3 SV=2	tr|A0A287AAR4|A0A287AAR4_PIG	460655		4.7	VAPEEHPVLLTEAPLNPK	RT: 82.62
iNS15-R3-1_SW_RC3_01_8032	Actin beta OS=Sus scrofa OX=9823 GN=ACTB PE=3 SV=2	tr|A0A287AAR4|A0A287AAR4_PIG	461339		4.8	VAPEEHPVLLTEAPLNPK	RT: 82.62
iNS15-R3-1_SW_RC3_01_8032	Actin beta OS=Sus scrofa OX=9823 GN=ACTB PE=3 SV=2	tr|A0A287AAR4|A0A287AAR4_PIG	199348		4.3	VAPEEHPVLLTEAPLNPKANR	RT: 71.51
iNS15-R3-1_SW_RC3_01_8032	Actin beta OS=Sus scrofa OX=9823 GN=ACTB PE=3 SV=2	tr|A0A287AAR4|A0A287AAR4_PIG	245841		3.8	VAPEEHPVLLTEAPLNPKANR	RT: 71.51
iNS15-R3-1_SW_RC3_01_8032	Actin beta OS=Sus scrofa OX=9823 GN=ACTB PE=3 SV=2	tr|A0A287AAR4|A0A287AAR4_PIG	20805		1.4	YPIEHGIVTNWDDMEK	RT: 73.26
iNS7-R1-1_SW_RA8_01_8013	Actin beta OS=Sus scrofa OX=9823 GN=ACTB PE=3 SV=2	tr|A0A287AAR4|A0A287AAR4_PIG	2052494		-7.1	AGFAGDDAPR	RT: 65
iNS7-R1-1_SW_RA8_01_8013	Actin beta OS=Sus scrofa OX=9823 GN=ACTB PE=3 SV=2	tr|A0A287AAR4|A0A287AAR4_PIG	74518		-1.4	AGFAGDDAPRAVFPSIVGRPR	RT: 83.92
iNS7-R1-1_SW_RA8_01_8013	Actin beta OS=Sus scrofa OX=9823 GN=ACTB PE=3 SV=2	tr|A0A287AAR4|A0A287AAR4_PIG	75373		-1.4	AGFAGDDAPRAVFPSIVGRPR	RT: 83.92
iNS7-R1-1_SW_RA8_01_8013	Actin beta OS=Sus scrofa OX=9823 GN=ACTB PE=3 SV=2	tr|A0A287AAR4|A0A287AAR4_PIG	687743		-1.3	AVFPSIVGRPR	RT: 69.39
iNS7-R1-1_SW_RA8_01_8013	Actin beta OS=Sus scrofa OX=9823 GN=ACTB PE=3 SV=2	tr|A0A287AAR4|A0A287AAR4_PIG	743527		-1.6	AVFPSIVGRPR	RT: 69.39
iNS7-R1-1_SW_RA8_01_8013	Actin beta OS=Sus scrofa OX=9823 GN=ACTB PE=3 SV=2	tr|A0A287AAR4|A0A287AAR4_PIG	160588		0	CPEALFQPSFLGMESCGIHETTFNSIMK	RT: 138.33
iNS7-R1-1_SW_RA8_01_8013	Actin beta OS=Sus scrofa OX=9823 GN=ACTB PE=3 SV=2	tr|A0A287AAR4|A0A287AAR4_PIG	356269		-3.4	DLTDYLMK	RT: 104.98
iNS7-R1-1_SW_RA8_01_8013	Actin beta OS=Sus scrofa OX=9823 GN=ACTB PE=3 SV=2	tr|A0A287AAR4|A0A287AAR4_PIG	798285		-4.4	DLTDYLMKILTER	RT: 73.55
iNS7-R1-1_SW_RA8_01_8013	Actin beta OS=Sus scrofa OX=9823 GN=ACTB PE=3 SV=2	tr|A0A287AAR4|A0A287AAR4_PIG	25840		-2.9	DLYANTVLSGGTTMYPGIADR	RT: 121.11
iNS7-R1-1_SW_RA8_01_8013	Actin beta OS=Sus scrofa OX=9823 GN=ACTB PE=3 SV=2	tr|A0A287AAR4|A0A287AAR4_PIG	385776		-4.3	DLYANTVLSGGTTMYPGIADR	RT: 121.11
iNS7-R1-1_SW_RA8_01_8013	Actin beta OS=Sus scrofa OX=9823 GN=ACTB PE=3 SV=2	tr|A0A287AAR4|A0A287AAR4_PIG	318250		-6.3	DLYANTVLSGGTTMYPGIADR	RT: 107.7
iNS7-R1-1_SW_RA8_01_8013	Actin beta OS=Sus scrofa OX=9823 GN=ACTB PE=3 SV=2	tr|A0A287AAR4|A0A287AAR4_PIG	459952		-1.4	DLYANTVLSGGTTMYPGIADR	RT: 107.7
iNS7-R1-1_SW_RA8_01_8013	Actin beta OS=Sus scrofa OX=9823 GN=ACTB PE=3 SV=2	tr|A0A287AAR4|A0A287AAR4_PIG	194351		-5	DSYVGDEAQSK	RT: 50.4
iNS7-R1-1_SW_RA8_01_8013	Actin beta OS=Sus scrofa OX=9823 GN=ACTB PE=3 SV=2	tr|A0A287AAR4|A0A287AAR4_PIG	171		-7.2	DSYVGDEAQSK	RT: 50.4
iNS7-R1-1_SW_RA8_01_8013	Actin beta OS=Sus scrofa OX=9823 GN=ACTB PE=3 SV=2	tr|A0A287AAR4|A0A287AAR4_PIG	3233534		-8	DSYVGDEAQSKR	RT: 64.51
iNS7-R1-1_SW_RA8_01_8013	Actin beta OS=Sus scrofa OX=9823 GN=ACTB PE=3 SV=2	tr|A0A287AAR4|A0A287AAR4_PIG	3212444		-8	DSYVGDEAQSKR	RT: 64.51
iNS7-R1-1_SW_RA8_01_8013	Actin beta OS=Sus scrofa OX=9823 GN=ACTB PE=3 SV=2	tr|A0A287AAR4|A0A287AAR4_PIG	315343		-5.7	EITALAPSTMK	RT: 67.29
iNS7-R1-1_SW_RA8_01_8013	Actin beta OS=Sus scrofa OX=9823 GN=ACTB PE=3 SV=2	tr|A0A287AAR4|A0A287AAR4_PIG	426816		-2.6	EITALAPSTMK	RT: 65.63
iNS7-R1-1_SW_RA8_01_8013	Actin beta OS=Sus scrofa OX=9823 GN=ACTB PE=3 SV=2	tr|A0A287AAR4|A0A287AAR4_PIG	139080		-4.4	EITALAPSTMKIK	RT: 75.84
iNS7-R1-1_SW_RA8_01_8013	Actin beta OS=Sus scrofa OX=9823 GN=ACTB PE=3 SV=2	tr|A0A287AAR4|A0A287AAR4_PIG	149435		-3.7	EITALAPSTMKIK	RT: 75.84
iNS7-R1-1_SW_RA8_01_8013	Actin beta OS=Sus scrofa OX=9823 GN=ACTB PE=3 SV=2	tr|A0A287AAR4|A0A287AAR4_PIG	32034		0.5	EITALAPSTMKIK	RT: 64.51
iNS7-R1-1_SW_RA8_01_8013	Actin beta OS=Sus scrofa OX=9823 GN=ACTB PE=3 SV=2	tr|A0A287AAR4|A0A287AAR4_PIG	73245		-0.3	EKLCYVALDFEQEMATAASSSSLEK	RT: 123.13
iNS7-R1-1_SW_RA8_01_8013	Actin beta OS=Sus scrofa OX=9823 GN=ACTB PE=3 SV=2	tr|A0A287AAR4|A0A287AAR4_PIG	16568		-1.4	EKMTQIMFETFNTPAMYVAIQAVLSLYASGR	RT: 197.32
iNS7-R1-1_SW_RA8_01_8013	Actin beta OS=Sus scrofa OX=9823 GN=ACTB PE=3 SV=2	tr|A0A287AAR4|A0A287AAR4_PIG	88217		-4	FRCPEALFQPSFLGMESCGIHETTFNSIMK	RT: 138.9
iNS7-R1-1_SW_RA8_01_8013	Actin beta OS=Sus scrofa OX=9823 GN=ACTB PE=3 SV=2	tr|A0A287AAR4|A0A287AAR4_PIG	91580		6.3	FRCPEALFQPSFLGMESCGIHETTFNSIMK	RT: 115.75
iNS7-R1-1_SW_RA8_01_8013	Actin beta OS=Sus scrofa OX=9823 GN=ACTB PE=3 SV=2	tr|A0A287AAR4|A0A287AAR4_PIG	82422		7.8	FRCPEALFQPSFLGMESCGIHETTFNSIMK	RT: 115.75
iNS7-R1-1_SW_RA8_01_8013	Actin beta OS=Sus scrofa OX=9823 GN=ACTB PE=3 SV=2	tr|A0A287AAR4|A0A287AAR4_PIG	1019882		-7.8	GYSFTTTAER	RT: 52.42
iNS7-R1-1_SW_RA8_01_8013	Actin beta OS=Sus scrofa OX=9823 GN=ACTB PE=3 SV=2	tr|A0A287AAR4|A0A287AAR4_PIG	2161459		-8.1	GYSFTTTAEREIVR	RT: 68.96
iNS7-R1-1_SW_RA8_01_8013	Actin beta OS=Sus scrofa OX=9823 GN=ACTB PE=3 SV=2	tr|A0A287AAR4|A0A287AAR4_PIG	115672		0.8	HQGVMVGMGQK	RT: 42.48
iNS7-R1-1_SW_RA8_01_8013	Actin beta OS=Sus scrofa OX=9823 GN=ACTB PE=3 SV=2	tr|A0A287AAR4|A0A287AAR4_PIG	155420		1.6	HQGVMVGMGQK	RT: 43.44
iNS7-R1-1_SW_RA8_01_8013	Actin beta OS=Sus scrofa OX=9823 GN=ACTB PE=3 SV=2	tr|A0A287AAR4|A0A287AAR4_PIG	127927		-1.2	HQGVMVGMGQK	RT: 53.25
iNS7-R1-1_SW_RA8_01_8013	Actin beta OS=Sus scrofa OX=9823 GN=ACTB PE=3 SV=2	tr|A0A287AAR4|A0A287AAR4_PIG	124963		-2.2	HQGVMVGMGQK	RT: 51.38
iNS7-R1-1_SW_RA8_01_8013	Actin beta OS=Sus scrofa OX=9823 GN=ACTB PE=3 SV=2	tr|A0A287AAR4|A0A287AAR4_PIG	128022		-4.6	HQGVMVGMGQK	RT: 51.38
iNS7-R1-1_SW_RA8_01_8013	Actin beta OS=Sus scrofa OX=9823 GN=ACTB PE=3 SV=2	tr|A0A287AAR4|A0A287AAR4_PIG	106552		5.3	HQGVMVGMGQKDSYVGDEAQSK	RT: 51.24
iNS7-R1-1_SW_RA8_01_8013	Actin beta OS=Sus scrofa OX=9823 GN=ACTB PE=3 SV=2	tr|A0A287AAR4|A0A287AAR4_PIG	105982		5.3	HQGVMVGMGQKDSYVGDEAQSK	RT: 51.24
iNS7-R1-1_SW_RA8_01_8013	Actin beta OS=Sus scrofa OX=9823 GN=ACTB PE=3 SV=2	tr|A0A287AAR4|A0A287AAR4_PIG	143963		3.6	HQGVMVGMGQKDSYVGDEAQSK	RT: 54.01
iNS7-R1-1_SW_RA8_01_8013	Actin beta OS=Sus scrofa OX=9823 GN=ACTB PE=3 SV=2	tr|A0A287AAR4|A0A287AAR4_PIG	140638		3.6	HQGVMVGMGQKDSYVGDEAQSK	RT: 54.01
iNS7-R1-1_SW_RA8_01_8013	Actin beta OS=Sus scrofa OX=9823 GN=ACTB PE=3 SV=2	tr|A0A287AAR4|A0A287AAR4_PIG	92245		-8.3	HQGVMVGMGQKDSYVGDEAQSK	RT: 46.52
iNS7-R1-1_SW_RA8_01_8013	Actin beta OS=Sus scrofa OX=9823 GN=ACTB PE=3 SV=2	tr|A0A287AAR4|A0A287AAR4_PIG	93404		-8.3	HQGVMVGMGQKDSYVGDEAQSK	RT: 46.52
iNS7-R1-1_SW_RA8_01_8013	Actin beta OS=Sus scrofa OX=9823 GN=ACTB PE=3 SV=2	tr|A0A287AAR4|A0A287AAR4_PIG	67735		1.9	HQGVMVGMGQKDSYVGDEAQSK	RT: 42.33
iNS7-R1-1_SW_RA8_01_8013	Actin beta OS=Sus scrofa OX=9823 GN=ACTB PE=3 SV=2	tr|A0A287AAR4|A0A287AAR4_PIG	78337		0.9	HQGVMVGMGQKDSYVGDEAQSK	RT: 42.33
iNS7-R1-1_SW_RA8_01_8013	Actin beta OS=Sus scrofa OX=9823 GN=ACTB PE=3 SV=2	tr|A0A287AAR4|A0A287AAR4_PIG	759031		-7.1	KDLYANTVLSGGTTMYPGIADR	RT: 100.31
iNS7-R1-1_SW_RA8_01_8013	Actin beta OS=Sus scrofa OX=9823 GN=ACTB PE=3 SV=2	tr|A0A287AAR4|A0A287AAR4_PIG	297179		-6	KDLYANTVLSGGTTMYPGIADR	RT: 105.66
iNS7-R1-1_SW_RA8_01_8013	Actin beta OS=Sus scrofa OX=9823 GN=ACTB PE=3 SV=2	tr|A0A287AAR4|A0A287AAR4_PIG	39957		-1.7	LCYVALDFEQEMATAASSSSLEK	RT: 137.09
iNS7-R1-1_SW_RA8_01_8013	Actin beta OS=Sus scrofa OX=9823 GN=ACTB PE=3 SV=2	tr|A0A287AAR4|A0A287AAR4_PIG	35720		4.1	LCYVALDFEQEMATAASSSSLEKSYELPDGQVITIGNER	RT: 154.46
iNS7-R1-1_SW_RA8_01_8013	Actin beta OS=Sus scrofa OX=9823 GN=ACTB PE=3 SV=2	tr|A0A287AAR4|A0A287AAR4_PIG	256861		-2.5	LDLAGRDLTDYLMK	RT: 110.13
iNS7-R1-1_SW_RA8_01_8013	Actin beta OS=Sus scrofa OX=9823 GN=ACTB PE=3 SV=2	tr|A0A287AAR4|A0A287AAR4_PIG	18335		-2.4	LDLAGRDLTDYLMK	RT: 17.66
iNS7-R1-1_SW_RA8_01_8013	Actin beta OS=Sus scrofa OX=9823 GN=ACTB PE=3 SV=2	tr|A0A287AAR4|A0A287AAR4_PIG	10355		-3.4	MDDDIAALVVDNGSGMCK	RT: 28.63
iNS7-R1-1_SW_RA8_01_8013	Actin beta OS=Sus scrofa OX=9823 GN=ACTB PE=3 SV=2	tr|A0A287AAR4|A0A287AAR4_PIG	86203		1	MDDDIAALVVDNGSGMCKAGFAGDDAPR	RT: 109.02
iNS7-R1-1_SW_RA8_01_8013	Actin beta OS=Sus scrofa OX=9823 GN=ACTB PE=3 SV=2	tr|A0A287AAR4|A0A287AAR4_PIG	616265		4.5	MDDDIAALVVDNGSGMCKAGFAGDDAPR	RT: 84.81
iNS7-R1-1_SW_RA8_01_8013	Actin beta OS=Sus scrofa OX=9823 GN=ACTB PE=3 SV=2	tr|A0A287AAR4|A0A287AAR4_PIG	1650796		-8.4	MDDDIAALVVDNGSGMCKAGFAGDDAPR	RT: 84.81
iNS7-R1-1_SW_RA8_01_8013	Actin beta OS=Sus scrofa OX=9823 GN=ACTB PE=3 SV=2	tr|A0A287AAR4|A0A287AAR4_PIG	133057		1.2	MDDDIAALVVDNGSGMCKAGFAGDDAPR	RT: 100.19
iNS7-R1-1_SW_RA8_01_8013	Actin beta OS=Sus scrofa OX=9823 GN=ACTB PE=3 SV=2	tr|A0A287AAR4|A0A287AAR4_PIG	179683		2.4	MQKEITALAPSTMK	RT: 64.8
iNS7-R1-1_SW_RA8_01_8013	Actin beta OS=Sus scrofa OX=9823 GN=ACTB PE=3 SV=2	tr|A0A287AAR4|A0A287AAR4_PIG	85481		-0.8	MQKEITALAPSTMK	RT: 64.8
iNS7-R1-1_SW_RA8_01_8013	Actin beta OS=Sus scrofa OX=9823 GN=ACTB PE=3 SV=2	tr|A0A287AAR4|A0A287AAR4_PIG	309624		-6.5	MQKEITALAPSTMK	RT: 55.9
iNS7-R1-1_SW_RA8_01_8013	Actin beta OS=Sus scrofa OX=9823 GN=ACTB PE=3 SV=2	tr|A0A287AAR4|A0A287AAR4_PIG	25270		-1.3	MQKEITALAPSTMK	RT: 55.9
iNS7-R1-1_SW_RA8_01_8013	Actin beta OS=Sus scrofa OX=9823 GN=ACTB PE=3 SV=2	tr|A0A287AAR4|A0A287AAR4_PIG	51338		5.4	MQKEITALAPSTMK	RT: 68.13
iNS7-R1-1_SW_RA8_01_8013	Actin beta OS=Sus scrofa OX=9823 GN=ACTB PE=3 SV=2	tr|A0A287AAR4|A0A287AAR4_PIG	1062841		-4.7	MQKEITALAPSTMK	RT: 68.13
iNS7-R1-1_SW_RA8_01_8013	Actin beta OS=Sus scrofa OX=9823 GN=ACTB PE=3 SV=2	tr|A0A287AAR4|A0A287AAR4_PIG	208677		-2.7	MQKEITALAPSTMK	RT: 60.42
iNS7-R1-1_SW_RA8_01_8013	Actin beta OS=Sus scrofa OX=9823 GN=ACTB PE=3 SV=2	tr|A0A287AAR4|A0A287AAR4_PIG	532950		-1.6	MQKEITALAPSTMK	RT: 60.42
iNS7-R1-1_SW_RA8_01_8013	Actin beta OS=Sus scrofa OX=9823 GN=ACTB PE=3 SV=2	tr|A0A287AAR4|A0A287AAR4_PIG	36195		-1.9	MTQIMFETFNTPAMYVAIQAVLSLYASGR	RT: 200.59
iNS7-R1-1_SW_RA8_01_8013	Actin beta OS=Sus scrofa OX=9823 GN=ACTB PE=3 SV=2	tr|A0A287AAR4|A0A287AAR4_PIG	27208		-2.4	RGILTLK	RT: 35.79
iNS7-R1-1_SW_RA8_01_8013	Actin beta OS=Sus scrofa OX=9823 GN=ACTB PE=3 SV=2	tr|A0A287AAR4|A0A287AAR4_PIG	208240		-2.1	SYELPDGQVITIGNER	RT: 68.78
iNS7-R1-1_SW_RA8_01_8013	Actin beta OS=Sus scrofa OX=9823 GN=ACTB PE=3 SV=2	tr|A0A287AAR4|A0A287AAR4_PIG	208392		-2.1	SYELPDGQVITIGNER	RT: 68.78
iNS7-R1-1_SW_RA8_01_8013	Actin beta OS=Sus scrofa OX=9823 GN=ACTB PE=3 SV=2	tr|A0A287AAR4|A0A287AAR4_PIG	71991		-1.1	SYELPDGQVITIGNERFR	RT: 97.9
iNS7-R1-1_SW_RA8_01_8013	Actin beta OS=Sus scrofa OX=9823 GN=ACTB PE=3 SV=2	tr|A0A287AAR4|A0A287AAR4_PIG	480092		-6.1	TTGIVMDSGDGVTHTVPIYEGYALPHAILR	RT: 119.17
iNS7-R1-1_SW_RA8_01_8013	Actin beta OS=Sus scrofa OX=9823 GN=ACTB PE=3 SV=2	tr|A0A287AAR4|A0A287AAR4_PIG	490010		-5.9	TTGIVMDSGDGVTHTVPIYEGYALPHAILR	RT: 119.17
iNS7-R1-1_SW_RA8_01_8013	Actin beta OS=Sus scrofa OX=9823 GN=ACTB PE=3 SV=2	tr|A0A287AAR4|A0A287AAR4_PIG	2135581		-8.2	TTGIVMDSGDGVTHTVPIYEGYALPHAILR	RT: 65
iNS7-R1-1_SW_RA8_01_8013	Actin beta OS=Sus scrofa OX=9823 GN=ACTB PE=3 SV=2	tr|A0A287AAR4|A0A287AAR4_PIG	22477		0.6	VAPEEHPVLLTEAPLNPK	RT: 85.93
iNS7-R1-1_SW_RA8_01_8013	Actin beta OS=Sus scrofa OX=9823 GN=ACTB PE=3 SV=2	tr|A0A287AAR4|A0A287AAR4_PIG	620920		-4.6	VAPEEHPVLLTEAPLNPK	RT: 85.93
iNS7-R1-1_SW_RA8_01_8013	Actin beta OS=Sus scrofa OX=9823 GN=ACTB PE=3 SV=2	tr|A0A287AAR4|A0A287AAR4_PIG	92777		-1.9	VAPEEHPVLLTEAPLNPKANR	RT: 70.36
iNS7-R1-1_SW_RA8_01_8013	Actin beta OS=Sus scrofa OX=9823 GN=ACTB PE=3 SV=2	tr|A0A287AAR4|A0A287AAR4_PIG	1288447		-6.1	VAPEEHPVLLTEAPLNPKANR	RT: 70.36
iNS7-R1-1_SW_RA8_01_8013	Actin beta OS=Sus scrofa OX=9823 GN=ACTB PE=3 SV=2	tr|A0A287AAR4|A0A287AAR4_PIG	232807		-3.3	YPIEHGIVTNWDDMEK	RT: 69.87
iNS7-R2-1_SW_RB5_01_8019	Actin beta OS=Sus scrofa OX=9823 GN=ACTB PE=3 SV=2	tr|A0A287AAR4|A0A287AAR4_PIG	107806		-2.1	AGFAGDDAPR	RT: 34.56
iNS7-R2-1_SW_RB5_01_8019	Actin beta OS=Sus scrofa OX=9823 GN=ACTB PE=3 SV=2	tr|A0A287AAR4|A0A287AAR4_PIG	912		-4.5	AGFAGDDAPRAVFPSIVGRPR	RT: 83.97
iNS7-R2-1_SW_RB5_01_8019	Actin beta OS=Sus scrofa OX=9823 GN=ACTB PE=3 SV=2	tr|A0A287AAR4|A0A287AAR4_PIG	912		-4.5	AGFAGDDAPRAVFPSIVGRPR	RT: 83.97
iNS7-R2-1_SW_RB5_01_8019	Actin beta OS=Sus scrofa OX=9823 GN=ACTB PE=3 SV=2	tr|A0A287AAR4|A0A287AAR4_PIG	1178		-8	AVFPSIVGRPR	RT: 63.94
iNS7-R2-1_SW_RB5_01_8019	Actin beta OS=Sus scrofa OX=9823 GN=ACTB PE=3 SV=2	tr|A0A287AAR4|A0A287AAR4_PIG	11495		-0.5	AVFPSIVGRPR	RT: 63.94
iNS7-R2-1_SW_RB5_01_8019	Actin beta OS=Sus scrofa OX=9823 GN=ACTB PE=3 SV=2	tr|A0A287AAR4|A0A287AAR4_PIG	1311		-0.1	CPEALFQPSFLGMESCGIHETTFNSIMK	RT: 136.6
iNS7-R2-1_SW_RB5_01_8019	Actin beta OS=Sus scrofa OX=9823 GN=ACTB PE=3 SV=2	tr|A0A287AAR4|A0A287AAR4_PIG	1444		-2.2	DLTDYLMK	RT: 101.64
iNS7-R2-1_SW_RB5_01_8019	Actin beta OS=Sus scrofa OX=9823 GN=ACTB PE=3 SV=2	tr|A0A287AAR4|A0A287AAR4_PIG	2622		2.4	DLTDYLMKILTER	RT: 70.89
iNS7-R2-1_SW_RB5_01_8019	Actin beta OS=Sus scrofa OX=9823 GN=ACTB PE=3 SV=2	tr|A0A287AAR4|A0A287AAR4_PIG	1501		-4.1	DLYANTVLSGGTTMYPGIADR	RT: 126.34
iNS7-R2-1_SW_RB5_01_8019	Actin beta OS=Sus scrofa OX=9823 GN=ACTB PE=3 SV=2	tr|A0A287AAR4|A0A287AAR4_PIG	513		4.4	DLYANTVLSGGTTMYPGIADR	RT: 126.34
iNS7-R2-1_SW_RB5_01_8019	Actin beta OS=Sus scrofa OX=9823 GN=ACTB PE=3 SV=2	tr|A0A287AAR4|A0A287AAR4_PIG	187948		-3.4	DLYANTVLSGGTTMYPGIADR	RT: 64.28
iNS7-R2-1_SW_RB5_01_8019	Actin beta OS=Sus scrofa OX=9823 GN=ACTB PE=3 SV=2	tr|A0A287AAR4|A0A287AAR4_PIG	399		-3.3	DLYANTVLSGGTTMYPGIADR	RT: 64.28
iNS7-R2-1_SW_RB5_01_8019	Actin beta OS=Sus scrofa OX=9823 GN=ACTB PE=3 SV=2	tr|A0A287AAR4|A0A287AAR4_PIG	7144		-3.4	DSYVGDEAQSK	RT: 37.9
iNS7-R2-1_SW_RB5_01_8019	Actin beta OS=Sus scrofa OX=9823 GN=ACTB PE=3 SV=2	tr|A0A287AAR4|A0A287AAR4_PIG	3743		-7	DSYVGDEAQSK	RT: 37.9
iNS7-R2-1_SW_RB5_01_8019	Actin beta OS=Sus scrofa OX=9823 GN=ACTB PE=3 SV=2	tr|A0A287AAR4|A0A287AAR4_PIG	58748		-1	DSYVGDEAQSKR	RT: 34.56
iNS7-R2-1_SW_RB5_01_8019	Actin beta OS=Sus scrofa OX=9823 GN=ACTB PE=3 SV=2	tr|A0A287AAR4|A0A287AAR4_PIG	54587		-1.1	DSYVGDEAQSKR	RT: 34.56
iNS7-R2-1_SW_RB5_01_8019	Actin beta OS=Sus scrofa OX=9823 GN=ACTB PE=3 SV=2	tr|A0A287AAR4|A0A287AAR4_PIG	12711		2	EITALAPSTMK	RT: 65.68
iNS7-R2-1_SW_RB5_01_8019	Actin beta OS=Sus scrofa OX=9823 GN=ACTB PE=3 SV=2	tr|A0A287AAR4|A0A287AAR4_PIG	10697		-2.6	EITALAPSTMK	RT: 56.14
iNS7-R2-1_SW_RB5_01_8019	Actin beta OS=Sus scrofa OX=9823 GN=ACTB PE=3 SV=2	tr|A0A287AAR4|A0A287AAR4_PIG	1330		-2.1	EITALAPSTMKIK	RT: 68.81
iNS7-R2-1_SW_RB5_01_8019	Actin beta OS=Sus scrofa OX=9823 GN=ACTB PE=3 SV=2	tr|A0A287AAR4|A0A287AAR4_PIG	2755		-3.9	EITALAPSTMKIK	RT: 68.81
iNS7-R2-1_SW_RB5_01_8019	Actin beta OS=Sus scrofa OX=9823 GN=ACTB PE=3 SV=2	tr|A0A287AAR4|A0A287AAR4_PIG	5776		-1.8	EITALAPSTMKIK	RT: 54.88
iNS7-R2-1_SW_RB5_01_8019	Actin beta OS=Sus scrofa OX=9823 GN=ACTB PE=3 SV=2	tr|A0A287AAR4|A0A287AAR4_PIG	817		-2.8	EKLCYVALDFEQEMATAASSSSLEK	RT: 127.73
iNS7-R2-1_SW_RB5_01_8019	Actin beta OS=Sus scrofa OX=9823 GN=ACTB PE=3 SV=2	tr|A0A287AAR4|A0A287AAR4_PIG	817		2	EKMTQIMFETFNTPAMYVAIQAVLSLYASGR	RT: 195.69
iNS7-R2-1_SW_RB5_01_8019	Actin beta OS=Sus scrofa OX=9823 GN=ACTB PE=3 SV=2	tr|A0A287AAR4|A0A287AAR4_PIG	1577		3.5	FRCPEALFQPSFLGMESCGIHETTFNSIMK	RT: 128.21
iNS7-R2-1_SW_RB5_01_8019	Actin beta OS=Sus scrofa OX=9823 GN=ACTB PE=3 SV=2	tr|A0A287AAR4|A0A287AAR4_PIG	855		0.6	FRCPEALFQPSFLGMESCGIHETTFNSIMK	RT: 124.09
iNS7-R2-1_SW_RB5_01_8019	Actin beta OS=Sus scrofa OX=9823 GN=ACTB PE=3 SV=2	tr|A0A287AAR4|A0A287AAR4_PIG	722		3.4	FRCPEALFQPSFLGMESCGIHETTFNSIMK	RT: 121.27
iNS7-R2-1_SW_RB5_01_8019	Actin beta OS=Sus scrofa OX=9823 GN=ACTB PE=3 SV=2	tr|A0A287AAR4|A0A287AAR4_PIG	11305		2.6	GYSFTTTAER	RT: 46.06
iNS7-R2-1_SW_RB5_01_8019	Actin beta OS=Sus scrofa OX=9823 GN=ACTB PE=3 SV=2	tr|A0A287AAR4|A0A287AAR4_PIG	6308		3.9	GYSFTTTAEREIVR	RT: 70.89
iNS7-R2-1_SW_RB5_01_8019	Actin beta OS=Sus scrofa OX=9823 GN=ACTB PE=3 SV=2	tr|A0A287AAR4|A0A287AAR4_PIG	20368		2.1	HQGVMVGMGQK	RT: 36.65
iNS7-R2-1_SW_RB5_01_8019	Actin beta OS=Sus scrofa OX=9823 GN=ACTB PE=3 SV=2	tr|A0A287AAR4|A0A287AAR4_PIG	8379		-1.1	HQGVMVGMGQK	RT: 34.49
iNS7-R2-1_SW_RB5_01_8019	Actin beta OS=Sus scrofa OX=9823 GN=ACTB PE=3 SV=2	tr|A0A287AAR4|A0A287AAR4_PIG	11628		0.3	HQGVMVGMGQK	RT: 34.49
iNS7-R2-1_SW_RB5_01_8019	Actin beta OS=Sus scrofa OX=9823 GN=ACTB PE=3 SV=2	tr|A0A287AAR4|A0A287AAR4_PIG	6232		-6	HQGVMVGMGQK	RT: 35.95
iNS7-R2-1_SW_RB5_01_8019	Actin beta OS=Sus scrofa OX=9823 GN=ACTB PE=3 SV=2	tr|A0A287AAR4|A0A287AAR4_PIG	4750		-5.8	HQGVMVGMGQK	RT: 35.95
iNS7-R2-1_SW_RB5_01_8019	Actin beta OS=Sus scrofa OX=9823 GN=ACTB PE=3 SV=2	tr|A0A287AAR4|A0A287AAR4_PIG	5833		-3.1	HQGVMVGMGQKDSYVGDEAQSK	RT: 50.29
iNS7-R2-1_SW_RB5_01_8019	Actin beta OS=Sus scrofa OX=9823 GN=ACTB PE=3 SV=2	tr|A0A287AAR4|A0A287AAR4_PIG	7429		-0.8	HQGVMVGMGQKDSYVGDEAQSK	RT: 50.29
iNS7-R2-1_SW_RB5_01_8019	Actin beta OS=Sus scrofa OX=9823 GN=ACTB PE=3 SV=2	tr|A0A287AAR4|A0A287AAR4_PIG	7087		6.3	HQGVMVGMGQKDSYVGDEAQSK	RT: 38.74
iNS7-R2-1_SW_RB5_01_8019	Actin beta OS=Sus scrofa OX=9823 GN=ACTB PE=3 SV=2	tr|A0A287AAR4|A0A287AAR4_PIG	7087		6.3	HQGVMVGMGQKDSYVGDEAQSK	RT: 38.74
iNS7-R2-1_SW_RB5_01_8019	Actin beta OS=Sus scrofa OX=9823 GN=ACTB PE=3 SV=2	tr|A0A287AAR4|A0A287AAR4_PIG	7847		-3.4	HQGVMVGMGQKDSYVGDEAQSK	RT: 46.18
iNS7-R2-1_SW_RB5_01_8019	Actin beta OS=Sus scrofa OX=9823 GN=ACTB PE=3 SV=2	tr|A0A287AAR4|A0A287AAR4_PIG	8341		-0.1	HQGVMVGMGQKDSYVGDEAQSK	RT: 46.18
iNS7-R2-1_SW_RB5_01_8019	Actin beta OS=Sus scrofa OX=9823 GN=ACTB PE=3 SV=2	tr|A0A287AAR4|A0A287AAR4_PIG	456		0.7	HQGVMVGMGQKDSYVGDEAQSK	RT: 39.85
iNS7-R2-1_SW_RB5_01_8019	Actin beta OS=Sus scrofa OX=9823 GN=ACTB PE=3 SV=2	tr|A0A287AAR4|A0A287AAR4_PIG	12654		-0.7	HQGVMVGMGQKDSYVGDEAQSK	RT: 39.85
iNS7-R2-1_SW_RB5_01_8019	Actin beta OS=Sus scrofa OX=9823 GN=ACTB PE=3 SV=2	tr|A0A287AAR4|A0A287AAR4_PIG	8797		4.1	KDLYANTVLSGGTTMYPGIADR	RT: 97.4
iNS7-R2-1_SW_RB5_01_8019	Actin beta OS=Sus scrofa OX=9823 GN=ACTB PE=3 SV=2	tr|A0A287AAR4|A0A287AAR4_PIG	3629		-0.1	KDLYANTVLSGGTTMYPGIADR	RT: 90.72
iNS7-R2-1_SW_RB5_01_8019	Actin beta OS=Sus scrofa OX=9823 GN=ACTB PE=3 SV=2	tr|A0A287AAR4|A0A287AAR4_PIG	1045		-3.9	LCYVALDFEQEMATAASSSSLEK	RT: 137.84
iNS7-R2-1_SW_RB5_01_8019	Actin beta OS=Sus scrofa OX=9823 GN=ACTB PE=3 SV=2	tr|A0A287AAR4|A0A287AAR4_PIG	1672		0	LCYVALDFEQEMATAASSSSLEKSYELPDGQVITIGNER	RT: 154.87
iNS7-R2-1_SW_RB5_01_8019	Actin beta OS=Sus scrofa OX=9823 GN=ACTB PE=3 SV=2	tr|A0A287AAR4|A0A287AAR4_PIG	380		-1.1	LDLAGRDLTDYLMK	RT: 105.54
iNS7-R2-1_SW_RB5_01_8019	Actin beta OS=Sus scrofa OX=9823 GN=ACTB PE=3 SV=2	tr|A0A287AAR4|A0A287AAR4_PIG	2945		3.9	LDLAGRDLTDYLMK	RT: 15.27
iNS7-R2-1_SW_RB5_01_8019	Actin beta OS=Sus scrofa OX=9823 GN=ACTB PE=3 SV=2	tr|A0A287AAR4|A0A287AAR4_PIG	893		4.3	MDDDIAALVVDNGSGMCK	RT: 27.94
iNS7-R2-1_SW_RB5_01_8019	Actin beta OS=Sus scrofa OX=9823 GN=ACTB PE=3 SV=2	tr|A0A287AAR4|A0A287AAR4_PIG	323		-3.4	MDDDIAALVVDNGSGMCKAGFAGDDAPR	RT: 110.96
iNS7-R2-1_SW_RB5_01_8019	Actin beta OS=Sus scrofa OX=9823 GN=ACTB PE=3 SV=2	tr|A0A287AAR4|A0A287AAR4_PIG	13756		-2	MDDDIAALVVDNGSGMCKAGFAGDDAPR	RT: 85.15
iNS7-R2-1_SW_RB5_01_8019	Actin beta OS=Sus scrofa OX=9823 GN=ACTB PE=3 SV=2	tr|A0A287AAR4|A0A287AAR4_PIG	1294551		-4.2	MDDDIAALVVDNGSGMCKAGFAGDDAPR	RT: 85.15
iNS7-R2-1_SW_RB5_01_8019	Actin beta OS=Sus scrofa OX=9823 GN=ACTB PE=3 SV=2	tr|A0A287AAR4|A0A287AAR4_PIG	4142		-1.5	MDDDIAALVVDNGSGMCKAGFAGDDAPR	RT: 128.15
iNS7-R2-1_SW_RB5_01_8019	Actin beta OS=Sus scrofa OX=9823 GN=ACTB PE=3 SV=2	tr|A0A287AAR4|A0A287AAR4_PIG	1976		0.7	MQKEITALAPSTMK	RT: 63.38
iNS7-R2-1_SW_RB5_01_8019	Actin beta OS=Sus scrofa OX=9823 GN=ACTB PE=3 SV=2	tr|A0A287AAR4|A0A287AAR4_PIG	1976		0.7	MQKEITALAPSTMK	RT: 63.38
iNS7-R2-1_SW_RB5_01_8019	Actin beta OS=Sus scrofa OX=9823 GN=ACTB PE=3 SV=2	tr|A0A287AAR4|A0A287AAR4_PIG	4446		-1.1	MQKEITALAPSTMK	RT: 63.73
iNS7-R2-1_SW_RB5_01_8019	Actin beta OS=Sus scrofa OX=9823 GN=ACTB PE=3 SV=2	tr|A0A287AAR4|A0A287AAR4_PIG	2489		-2	MQKEITALAPSTMK	RT: 63.73
iNS7-R2-1_SW_RB5_01_8019	Actin beta OS=Sus scrofa OX=9823 GN=ACTB PE=3 SV=2	tr|A0A287AAR4|A0A287AAR4_PIG	4769		-3.7	MQKEITALAPSTMK	RT: 54.47
iNS7-R2-1_SW_RB5_01_8019	Actin beta OS=Sus scrofa OX=9823 GN=ACTB PE=3 SV=2	tr|A0A287AAR4|A0A287AAR4_PIG	4902		0.4	MQKEITALAPSTMK	RT: 54.47
iNS7-R2-1_SW_RB5_01_8019	Actin beta OS=Sus scrofa OX=9823 GN=ACTB PE=3 SV=2	tr|A0A287AAR4|A0A287AAR4_PIG	3610		-5.7	MQKEITALAPSTMK	RT: 47.99
iNS7-R2-1_SW_RB5_01_8019	Actin beta OS=Sus scrofa OX=9823 GN=ACTB PE=3 SV=2	tr|A0A287AAR4|A0A287AAR4_PIG	7144		-4.6	MQKEITALAPSTMK	RT: 47.99
iNS7-R2-1_SW_RB5_01_8019	Actin beta OS=Sus scrofa OX=9823 GN=ACTB PE=3 SV=2	tr|A0A287AAR4|A0A287AAR4_PIG	1520		-1	MTQIMFETFNTPAMYVAIQAVLSLYASGR	RT: 199.95
iNS7-R2-1_SW_RB5_01_8019	Actin beta OS=Sus scrofa OX=9823 GN=ACTB PE=3 SV=2	tr|A0A287AAR4|A0A287AAR4_PIG	4655		0.7	RGILTLK	RT: 39.71
iNS7-R2-1_SW_RB5_01_8019	Actin beta OS=Sus scrofa OX=9823 GN=ACTB PE=3 SV=2	tr|A0A287AAR4|A0A287AAR4_PIG	8341		-0.4	SYELPDGQVITIGNER	RT: 63.93
iNS7-R2-1_SW_RB5_01_8019	Actin beta OS=Sus scrofa OX=9823 GN=ACTB PE=3 SV=2	tr|A0A287AAR4|A0A287AAR4_PIG	10279		-0.3	SYELPDGQVITIGNER	RT: 63.93
iNS7-R2-1_SW_RB5_01_8019	Actin beta OS=Sus scrofa OX=9823 GN=ACTB PE=3 SV=2	tr|A0A287AAR4|A0A287AAR4_PIG	418		-4.8	SYELPDGQVITIGNERFR	RT: 94.28
iNS7-R2-1_SW_RB5_01_8019	Actin beta OS=Sus scrofa OX=9823 GN=ACTB PE=3 SV=2	tr|A0A287AAR4|A0A287AAR4_PIG	1007		-5	TTGIVMDSGDGVTHTVPIYEGYALPHAILR	RT: 118.2
iNS7-R2-1_SW_RB5_01_8019	Actin beta OS=Sus scrofa OX=9823 GN=ACTB PE=3 SV=2	tr|A0A287AAR4|A0A287AAR4_PIG	1368		-4.2	TTGIVMDSGDGVTHTVPIYEGYALPHAILR	RT: 118.2
iNS7-R2-1_SW_RB5_01_8019	Actin beta OS=Sus scrofa OX=9823 GN=ACTB PE=3 SV=2	tr|A0A287AAR4|A0A287AAR4_PIG	144799		-9	TTGIVMDSGDGVTHTVPIYEGYALPHAILR	RT: 64.28
iNS7-R2-1_SW_RB5_01_8019	Actin beta OS=Sus scrofa OX=9823 GN=ACTB PE=3 SV=2	tr|A0A287AAR4|A0A287AAR4_PIG	1748		-4.2	VAPEEHPVLLTEAPLNPK	RT: 82.72
iNS7-R2-1_SW_RB5_01_8019	Actin beta OS=Sus scrofa OX=9823 GN=ACTB PE=3 SV=2	tr|A0A287AAR4|A0A287AAR4_PIG	295642		-3.7	VAPEEHPVLLTEAPLNPK	RT: 82.72
iNS7-R2-1_SW_RB5_01_8019	Actin beta OS=Sus scrofa OX=9823 GN=ACTB PE=3 SV=2	tr|A0A287AAR4|A0A287AAR4_PIG	4579		-0.7	VAPEEHPVLLTEAPLNPKANR	RT: 69.01
iNS7-R2-1_SW_RB5_01_8019	Actin beta OS=Sus scrofa OX=9823 GN=ACTB PE=3 SV=2	tr|A0A287AAR4|A0A287AAR4_PIG	7619		-1.4	VAPEEHPVLLTEAPLNPKANR	RT: 69.01
iNS7-R2-1_SW_RB5_01_8019	Actin beta OS=Sus scrofa OX=9823 GN=ACTB PE=3 SV=2	tr|A0A287AAR4|A0A287AAR4_PIG	2128		-0.8	YPIEHGIVTNWDDMEK	RT: 71.24
iNS7-R3-1_SW_RC5_01_8031	Actin beta OS=Sus scrofa OX=9823 GN=ACTB PE=3 SV=2	tr|A0A287AAR4|A0A287AAR4_PIG	94354		-7.3	AGFAGDDAPR	RT: 27.87
iNS7-R3-1_SW_RC5_01_8031	Actin beta OS=Sus scrofa OX=9823 GN=ACTB PE=3 SV=2	tr|A0A287AAR4|A0A287AAR4_PIG	28367		5	AGFAGDDAPRAVFPSIVGRPR	RT: 84
iNS7-R3-1_SW_RC5_01_8031	Actin beta OS=Sus scrofa OX=9823 GN=ACTB PE=3 SV=2	tr|A0A287AAR4|A0A287AAR4_PIG	27246		5.4	AGFAGDDAPRAVFPSIVGRPR	RT: 84
iNS7-R3-1_SW_RC5_01_8031	Actin beta OS=Sus scrofa OX=9823 GN=ACTB PE=3 SV=2	tr|A0A287AAR4|A0A287AAR4_PIG	36423		-5.2	AVFPSIVGRPR	RT: 69.27
iNS7-R3-1_SW_RC5_01_8031	Actin beta OS=Sus scrofa OX=9823 GN=ACTB PE=3 SV=2	tr|A0A287AAR4|A0A287AAR4_PIG	40755		-4.9	AVFPSIVGRPR	RT: 69.27
iNS7-R3-1_SW_RC5_01_8031	Actin beta OS=Sus scrofa OX=9823 GN=ACTB PE=3 SV=2	tr|A0A287AAR4|A0A287AAR4_PIG	104386		-4.1	CPEALFQPSFLGMESCGIHETTFNSIMK	RT: 138.42
iNS7-R3-1_SW_RC5_01_8031	Actin beta OS=Sus scrofa OX=9823 GN=ACTB PE=3 SV=2	tr|A0A287AAR4|A0A287AAR4_PIG	28823		1.6	DLTDYLMK	RT: 101.65
iNS7-R3-1_SW_RC5_01_8031	Actin beta OS=Sus scrofa OX=9823 GN=ACTB PE=3 SV=2	tr|A0A287AAR4|A0A287AAR4_PIG	58805		-4.4	DLTDYLMKILTER	RT: 71.41
iNS7-R3-1_SW_RC5_01_8031	Actin beta OS=Sus scrofa OX=9823 GN=ACTB PE=3 SV=2	tr|A0A287AAR4|A0A287AAR4_PIG	37753		-3.9	DLYANTVLSGGTTMYPGIADR	RT: 126.61
iNS7-R3-1_SW_RC5_01_8031	Actin beta OS=Sus scrofa OX=9823 GN=ACTB PE=3 SV=2	tr|A0A287AAR4|A0A287AAR4_PIG	16739		-6.8	DLYANTVLSGGTTMYPGIADR	RT: 126.61
iNS7-R3-1_SW_RC5_01_8031	Actin beta OS=Sus scrofa OX=9823 GN=ACTB PE=3 SV=2	tr|A0A287AAR4|A0A287AAR4_PIG	577961		-3.3	DLYANTVLSGGTTMYPGIADR	RT: 84.97
iNS7-R3-1_SW_RC5_01_8031	Actin beta OS=Sus scrofa OX=9823 GN=ACTB PE=3 SV=2	tr|A0A287AAR4|A0A287AAR4_PIG	7809		2.6	DLYANTVLSGGTTMYPGIADR	RT: 84.97
iNS7-R3-1_SW_RC5_01_8031	Actin beta OS=Sus scrofa OX=9823 GN=ACTB PE=3 SV=2	tr|A0A287AAR4|A0A287AAR4_PIG	21318		-3.4	DSYVGDEAQSK	RT: 33.65
iNS7-R3-1_SW_RC5_01_8031	Actin beta OS=Sus scrofa OX=9823 GN=ACTB PE=3 SV=2	tr|A0A287AAR4|A0A287AAR4_PIG	42921		-2.8	DSYVGDEAQSK	RT: 33.65
iNS7-R3-1_SW_RC5_01_8031	Actin beta OS=Sus scrofa OX=9823 GN=ACTB PE=3 SV=2	tr|A0A287AAR4|A0A287AAR4_PIG	77406		-8.5	DSYVGDEAQSKR	RT: 17.98
iNS7-R3-1_SW_RC5_01_8031	Actin beta OS=Sus scrofa OX=9823 GN=ACTB PE=3 SV=2	tr|A0A287AAR4|A0A287AAR4_PIG	73188		-8.8	DSYVGDEAQSKR	RT: 17.98
iNS7-R3-1_SW_RC5_01_8031	Actin beta OS=Sus scrofa OX=9823 GN=ACTB PE=3 SV=2	tr|A0A287AAR4|A0A287AAR4_PIG	164179		-0.9	EITALAPSTMK	RT: 69.39
iNS7-R3-1_SW_RC5_01_8031	Actin beta OS=Sus scrofa OX=9823 GN=ACTB PE=3 SV=2	tr|A0A287AAR4|A0A287AAR4_PIG	133570		-0.3	EITALAPSTMK	RT: 47.76
iNS7-R3-1_SW_RC5_01_8031	Actin beta OS=Sus scrofa OX=9823 GN=ACTB PE=3 SV=2	tr|A0A287AAR4|A0A287AAR4_PIG	43966		-2.2	EITALAPSTMKIK	RT: 73.63
iNS7-R3-1_SW_RC5_01_8031	Actin beta OS=Sus scrofa OX=9823 GN=ACTB PE=3 SV=2	tr|A0A287AAR4|A0A287AAR4_PIG	34067		-1.4	EITALAPSTMKIK	RT: 73.63
iNS7-R3-1_SW_RC5_01_8031	Actin beta OS=Sus scrofa OX=9823 GN=ACTB PE=3 SV=2	tr|A0A287AAR4|A0A287AAR4_PIG	13870		1.1	EITALAPSTMKIK	RT: 63.76
iNS7-R3-1_SW_RC5_01_8031	Actin beta OS=Sus scrofa OX=9823 GN=ACTB PE=3 SV=2	tr|A0A287AAR4|A0A287AAR4_PIG	81282		-0.2	EKLCYVALDFEQEMATAASSSSLEK	RT: 129.13
iNS7-R3-1_SW_RC5_01_8031	Actin beta OS=Sus scrofa OX=9823 GN=ACTB PE=3 SV=2	tr|A0A287AAR4|A0A287AAR4_PIG	5624		-6	EKMTQIMFETFNTPAMYVAIQAVLSLYASGR	RT: 200.96
iNS7-R3-1_SW_RC5_01_8031	Actin beta OS=Sus scrofa OX=9823 GN=ACTB PE=3 SV=2	tr|A0A287AAR4|A0A287AAR4_PIG	10564		0.4	FRCPEALFQPSFLGMESCGIHETTFNSIMK	RT: 122.73
iNS7-R3-1_SW_RC5_01_8031	Actin beta OS=Sus scrofa OX=9823 GN=ACTB PE=3 SV=2	tr|A0A287AAR4|A0A287AAR4_PIG	24985		-3.5	FRCPEALFQPSFLGMESCGIHETTFNSIMK	RT: 116.33
iNS7-R3-1_SW_RC5_01_8031	Actin beta OS=Sus scrofa OX=9823 GN=ACTB PE=3 SV=2	tr|A0A287AAR4|A0A287AAR4_PIG	35815		-3.6	FRCPEALFQPSFLGMESCGIHETTFNSIMK	RT: 116.05
iNS7-R3-1_SW_RC5_01_8031	Actin beta OS=Sus scrofa OX=9823 GN=ACTB PE=3 SV=2	tr|A0A287AAR4|A0A287AAR4_PIG	140847		-2.5	GYSFTTTAER	RT: 57.43
iNS7-R3-1_SW_RC5_01_8031	Actin beta OS=Sus scrofa OX=9823 GN=ACTB PE=3 SV=2	tr|A0A287AAR4|A0A287AAR4_PIG	93556		-4.2	GYSFTTTAEREIVR	RT: 73.5
iNS7-R3-1_SW_RC5_01_8031	Actin beta OS=Sus scrofa OX=9823 GN=ACTB PE=3 SV=2	tr|A0A287AAR4|A0A287AAR4_PIG	85196		-8.6	HQGVMVGMGQK	RT: 37.12
iNS7-R3-1_SW_RC5_01_8031	Actin beta OS=Sus scrofa OX=9823 GN=ACTB PE=3 SV=2	tr|A0A287AAR4|A0A287AAR4_PIG	116489		-6.3	HQGVMVGMGQK	RT: 37.12
iNS7-R3-1_SW_RC5_01_8031	Actin beta OS=Sus scrofa OX=9823 GN=ACTB PE=3 SV=2	tr|A0A287AAR4|A0A287AAR4_PIG	92131		-3.1	HQGVMVGMGQK	RT: 39.73
iNS7-R3-1_SW_RC5_01_8031	Actin beta OS=Sus scrofa OX=9823 GN=ACTB PE=3 SV=2	tr|A0A287AAR4|A0A287AAR4_PIG	82099		-6.5	HQGVMVGMGQK	RT: 37.12
iNS7-R3-1_SW_RC5_01_8031	Actin beta OS=Sus scrofa OX=9823 GN=ACTB PE=3 SV=2	tr|A0A287AAR4|A0A287AAR4_PIG	95722		-8.1	HQGVMVGMGQK	RT: 37.12
iNS7-R3-1_SW_RC5_01_8031	Actin beta OS=Sus scrofa OX=9823 GN=ACTB PE=3 SV=2	tr|A0A287AAR4|A0A287AAR4_PIG	74556		-1.2	HQGVMVGMGQKDSYVGDEAQSK	RT: 54.67
iNS7-R3-1_SW_RC5_01_8031	Actin beta OS=Sus scrofa OX=9823 GN=ACTB PE=3 SV=2	tr|A0A287AAR4|A0A287AAR4_PIG	22933		1.7	HQGVMVGMGQKDSYVGDEAQSK	RT: 54.67
iNS7-R3-1_SW_RC5_01_8031	Actin beta OS=Sus scrofa OX=9823 GN=ACTB PE=3 SV=2	tr|A0A287AAR4|A0A287AAR4_PIG	57798		1.7	HQGVMVGMGQKDSYVGDEAQSK	RT: 48.19
iNS7-R3-1_SW_RC5_01_8031	Actin beta OS=Sus scrofa OX=9823 GN=ACTB PE=3 SV=2	tr|A0A287AAR4|A0A287AAR4_PIG	4617		-0.5	HQGVMVGMGQKDSYVGDEAQSK	RT: 48.19
iNS7-R3-1_SW_RC5_01_8031	Actin beta OS=Sus scrofa OX=9823 GN=ACTB PE=3 SV=2	tr|A0A287AAR4|A0A287AAR4_PIG	26904		-4	HQGVMVGMGQKDSYVGDEAQSK	RT: 48.67
iNS7-R3-1_SW_RC5_01_8031	Actin beta OS=Sus scrofa OX=9823 GN=ACTB PE=3 SV=2	tr|A0A287AAR4|A0A287AAR4_PIG	68096		-2.5	HQGVMVGMGQKDSYVGDEAQSK	RT: 48.67
iNS7-R3-1_SW_RC5_01_8031	Actin beta OS=Sus scrofa OX=9823 GN=ACTB PE=3 SV=2	tr|A0A287AAR4|A0A287AAR4_PIG	3363		-3.7	HQGVMVGMGQKDSYVGDEAQSK	RT: 30.86
iNS7-R3-1_SW_RC5_01_8031	Actin beta OS=Sus scrofa OX=9823 GN=ACTB PE=3 SV=2	tr|A0A287AAR4|A0A287AAR4_PIG	36024		-3.8	HQGVMVGMGQKDSYVGDEAQSK	RT: 30.86
iNS7-R3-1_SW_RC5_01_8031	Actin beta OS=Sus scrofa OX=9823 GN=ACTB PE=3 SV=2	tr|A0A287AAR4|A0A287AAR4_PIG	48982		-4.1	KDLYANTVLSGGTTMYPGIADR	RT: 104.73
iNS7-R3-1_SW_RC5_01_8031	Actin beta OS=Sus scrofa OX=9823 GN=ACTB PE=3 SV=2	tr|A0A287AAR4|A0A287AAR4_PIG	159106		8	KDLYANTVLSGGTTMYPGIADR	RT: 90.46
iNS7-R3-1_SW_RC5_01_8031	Actin beta OS=Sus scrofa OX=9823 GN=ACTB PE=3 SV=2	tr|A0A287AAR4|A0A287AAR4_PIG	32167		-2.4	LCYVALDFEQEMATAASSSSLEK	RT: 136.83
iNS7-R3-1_SW_RC5_01_8031	Actin beta OS=Sus scrofa OX=9823 GN=ACTB PE=3 SV=2	tr|A0A287AAR4|A0A287AAR4_PIG	14003		-3.3	LCYVALDFEQEMATAASSSSLEKSYELPDGQVITIGNER	RT: 157.11
iNS7-R3-1_SW_RC5_01_8031	Actin beta OS=Sus scrofa OX=9823 GN=ACTB PE=3 SV=2	tr|A0A287AAR4|A0A287AAR4_PIG	38000		-3.6	LDLAGRDLTDYLMK	RT: 108.96
iNS7-R3-1_SW_RC5_01_8031	Actin beta OS=Sus scrofa OX=9823 GN=ACTB PE=3 SV=2	tr|A0A287AAR4|A0A287AAR4_PIG	105146		6.6	LDLAGRDLTDYLMK	RT: 17.63
iNS7-R3-1_SW_RC5_01_8031	Actin beta OS=Sus scrofa OX=9823 GN=ACTB PE=3 SV=2	tr|A0A287AAR4|A0A287AAR4_PIG	11989		3.3	MDDDIAALVVDNGSGMCK	RT: 29.55
iNS7-R3-1_SW_RC5_01_8031	Actin beta OS=Sus scrofa OX=9823 GN=ACTB PE=3 SV=2	tr|A0A287AAR4|A0A287AAR4_PIG	25175		0	MDDDIAALVVDNGSGMCKAGFAGDDAPR	RT: 109.1
iNS7-R3-1_SW_RC5_01_8031	Actin beta OS=Sus scrofa OX=9823 GN=ACTB PE=3 SV=2	tr|A0A287AAR4|A0A287AAR4_PIG	129029		3.9	MDDDIAALVVDNGSGMCKAGFAGDDAPR	RT: 84.83
iNS7-R3-1_SW_RC5_01_8031	Actin beta OS=Sus scrofa OX=9823 GN=ACTB PE=3 SV=2	tr|A0A287AAR4|A0A287AAR4_PIG	924325		-1.7	MDDDIAALVVDNGSGMCKAGFAGDDAPR	RT: 84.83
iNS7-R3-1_SW_RC5_01_8031	Actin beta OS=Sus scrofa OX=9823 GN=ACTB PE=3 SV=2	tr|A0A287AAR4|A0A287AAR4_PIG	28728		-4	MDDDIAALVVDNGSGMCKAGFAGDDAPR	RT: 118.56
iNS7-R3-1_SW_RC5_01_8031	Actin beta OS=Sus scrofa OX=9823 GN=ACTB PE=3 SV=2	tr|A0A287AAR4|A0A287AAR4_PIG	35777		2.3	MQKEITALAPSTMK	RT: 66.12
iNS7-R3-1_SW_RC5_01_8031	Actin beta OS=Sus scrofa OX=9823 GN=ACTB PE=3 SV=2	tr|A0A287AAR4|A0A287AAR4_PIG	47481		-2.9	MQKEITALAPSTMK	RT: 66.12
iNS7-R3-1_SW_RC5_01_8031	Actin beta OS=Sus scrofa OX=9823 GN=ACTB PE=3 SV=2	tr|A0A287AAR4|A0A287AAR4_PIG	14782		-2.9	MQKEITALAPSTMK	RT: 66.2
iNS7-R3-1_SW_RC5_01_8031	Actin beta OS=Sus scrofa OX=9823 GN=ACTB PE=3 SV=2	tr|A0A287AAR4|A0A287AAR4_PIG	93556		-2.8	MQKEITALAPSTMK	RT: 66.2
iNS7-R3-1_SW_RC5_01_8031	Actin beta OS=Sus scrofa OX=9823 GN=ACTB PE=3 SV=2	tr|A0A287AAR4|A0A287AAR4_PIG	65322		3.7	MQKEITALAPSTMK	RT: 49.99
iNS7-R3-1_SW_RC5_01_8031	Actin beta OS=Sus scrofa OX=9823 GN=ACTB PE=3 SV=2	tr|A0A287AAR4|A0A287AAR4_PIG	99864		5.4	MQKEITALAPSTMK	RT: 49.99
iNS7-R3-1_SW_RC5_01_8031	Actin beta OS=Sus scrofa OX=9823 GN=ACTB PE=3 SV=2	tr|A0A287AAR4|A0A287AAR4_PIG	220856		1.7	MQKEITALAPSTMK	RT: 49.93
iNS7-R3-1_SW_RC5_01_8031	Actin beta OS=Sus scrofa OX=9823 GN=ACTB PE=3 SV=2	tr|A0A287AAR4|A0A287AAR4_PIG	16359		-1.8	MQKEITALAPSTMK	RT: 49.93
iNS7-R3-1_SW_RC5_01_8031	Actin beta OS=Sus scrofa OX=9823 GN=ACTB PE=3 SV=2	tr|A0A287AAR4|A0A287AAR4_PIG	13661		-0.9	MTQIMFETFNTPAMYVAIQAVLSLYASGR	RT: 199.3
iNS7-R3-1_SW_RC5_01_8031	Actin beta OS=Sus scrofa OX=9823 GN=ACTB PE=3 SV=2	tr|A0A287AAR4|A0A287AAR4_PIG	30761		4.5	RGILTLK	RT: 40.95
iNS7-R3-1_SW_RC5_01_8031	Actin beta OS=Sus scrofa OX=9823 GN=ACTB PE=3 SV=2	tr|A0A287AAR4|A0A287AAR4_PIG	4199		4.9	SYELPDGQVITIGNER	RT: 79.2
iNS7-R3-1_SW_RC5_01_8031	Actin beta OS=Sus scrofa OX=9823 GN=ACTB PE=3 SV=2	tr|A0A287AAR4|A0A287AAR4_PIG	65854		-2.2	SYELPDGQVITIGNER	RT: 79.2
iNS7-R3-1_SW_RC5_01_8031	Actin beta OS=Sus scrofa OX=9823 GN=ACTB PE=3 SV=2	tr|A0A287AAR4|A0A287AAR4_PIG	15637		-4.5	SYELPDGQVITIGNERFR	RT: 93.18
iNS7-R3-1_SW_RC5_01_8031	Actin beta OS=Sus scrofa OX=9823 GN=ACTB PE=3 SV=2	tr|A0A287AAR4|A0A287AAR4_PIG	42541		-4.4	TTGIVMDSGDGVTHTVPIYEGYALPHAILR	RT: 114.99
iNS7-R3-1_SW_RC5_01_8031	Actin beta OS=Sus scrofa OX=9823 GN=ACTB PE=3 SV=2	tr|A0A287AAR4|A0A287AAR4_PIG	43814		-4.3	TTGIVMDSGDGVTHTVPIYEGYALPHAILR	RT: 114.99
iNS7-R3-1_SW_RC5_01_8031	Actin beta OS=Sus scrofa OX=9823 GN=ACTB PE=3 SV=2	tr|A0A287AAR4|A0A287AAR4_PIG	97375		6.2	TTGIVMDSGDGVTHTVPIYEGYALPHAILR	RT: 81.93
iNS7-R3-1_SW_RC5_01_8031	Actin beta OS=Sus scrofa OX=9823 GN=ACTB PE=3 SV=2	tr|A0A287AAR4|A0A287AAR4_PIG	24491		-4.9	VAPEEHPVLLTEAPLNPK	RT: 84.28
iNS7-R3-1_SW_RC5_01_8031	Actin beta OS=Sus scrofa OX=9823 GN=ACTB PE=3 SV=2	tr|A0A287AAR4|A0A287AAR4_PIG	416283		-1.3	VAPEEHPVLLTEAPLNPK	RT: 84.28
iNS7-R3-1_SW_RC5_01_8031	Actin beta OS=Sus scrofa OX=9823 GN=ACTB PE=3 SV=2	tr|A0A287AAR4|A0A287AAR4_PIG	15124		-5	VAPEEHPVLLTEAPLNPKANR	RT: 78.43
iNS7-R3-1_SW_RC5_01_8031	Actin beta OS=Sus scrofa OX=9823 GN=ACTB PE=3 SV=2	tr|A0A287AAR4|A0A287AAR4_PIG	81168		-6.5	VAPEEHPVLLTEAPLNPKANR	RT: 78.43
iNS7-R3-1_SW_RC5_01_8031	Actin beta OS=Sus scrofa OX=9823 GN=ACTB PE=3 SV=2	tr|A0A287AAR4|A0A287AAR4_PIG	34048		-2	YPIEHGIVTNWDDMEK	RT: 68.5
PEF-R1-1_SW_RA7_01_8012	Actin beta OS=Sus scrofa OX=9823 GN=ACTB PE=3 SV=2	tr|A0A287AAR4|A0A287AAR4_PIG	2431335		-4.6	AGFAGDDAPR	RT: 17.7
PEF-R1-1_SW_RA7_01_8012	Actin beta OS=Sus scrofa OX=9823 GN=ACTB PE=3 SV=2	tr|A0A287AAR4|A0A287AAR4_PIG	23579		2.7	AGFAGDDAPRAVFPSIVGRPR	RT: 83.91
PEF-R1-1_SW_RA7_01_8012	Actin beta OS=Sus scrofa OX=9823 GN=ACTB PE=3 SV=2	tr|A0A287AAR4|A0A287AAR4_PIG	24073		2.6	AGFAGDDAPRAVFPSIVGRPR	RT: 83.91
PEF-R1-1_SW_RA7_01_8012	Actin beta OS=Sus scrofa OX=9823 GN=ACTB PE=3 SV=2	tr|A0A287AAR4|A0A287AAR4_PIG	3534		-4.9	AVFPSIVGRPR	RT: 64.85
PEF-R1-1_SW_RA7_01_8012	Actin beta OS=Sus scrofa OX=9823 GN=ACTB PE=3 SV=2	tr|A0A287AAR4|A0A287AAR4_PIG	906661		-9.7	AVFPSIVGRPR	RT: 64.85
PEF-R1-1_SW_RA7_01_8012	Actin beta OS=Sus scrofa OX=9823 GN=ACTB PE=3 SV=2	tr|A0A287AAR4|A0A287AAR4_PIG	65854		-3.7	CPEALFQPSFLGMESCGIHETTFNSIMK	RT: 138.34
PEF-R1-1_SW_RA7_01_8012	Actin beta OS=Sus scrofa OX=9823 GN=ACTB PE=3 SV=2	tr|A0A287AAR4|A0A287AAR4_PIG	117648		-7.2	DLTDYLMK	RT: 101.7
PEF-R1-1_SW_RA7_01_8012	Actin beta OS=Sus scrofa OX=9823 GN=ACTB PE=3 SV=2	tr|A0A287AAR4|A0A287AAR4_PIG	892240		-5.5	DLTDYLMKILTER	RT: 73.47
PEF-R1-1_SW_RA7_01_8012	Actin beta OS=Sus scrofa OX=9823 GN=ACTB PE=3 SV=2	tr|A0A287AAR4|A0A287AAR4_PIG	42161		-1.6	DLYANTVLSGGTTMYPGIADR	RT: 121.3
PEF-R1-1_SW_RA7_01_8012	Actin beta OS=Sus scrofa OX=9823 GN=ACTB PE=3 SV=2	tr|A0A287AAR4|A0A287AAR4_PIG	581134		-4.9	DLYANTVLSGGTTMYPGIADR	RT: 121.3
PEF-R1-1_SW_RA7_01_8012	Actin beta OS=Sus scrofa OX=9823 GN=ACTB PE=3 SV=2	tr|A0A287AAR4|A0A287AAR4_PIG	2188458		-6.4	DLYANTVLSGGTTMYPGIADR	RT: 84.8
PEF-R1-1_SW_RA7_01_8012	Actin beta OS=Sus scrofa OX=9823 GN=ACTB PE=3 SV=2	tr|A0A287AAR4|A0A287AAR4_PIG	38551		4.1	DLYANTVLSGGTTMYPGIADR	RT: 84.8
PEF-R1-1_SW_RA7_01_8012	Actin beta OS=Sus scrofa OX=9823 GN=ACTB PE=3 SV=2	tr|A0A287AAR4|A0A287AAR4_PIG	12901		3.7	DSYVGDEAQSK	RT: 69.05
PEF-R1-1_SW_RA7_01_8012	Actin beta OS=Sus scrofa OX=9823 GN=ACTB PE=3 SV=2	tr|A0A287AAR4|A0A287AAR4_PIG	178562		-4.3	DSYVGDEAQSK	RT: 69.05
PEF-R1-1_SW_RA7_01_8012	Actin beta OS=Sus scrofa OX=9823 GN=ACTB PE=3 SV=2	tr|A0A287AAR4|A0A287AAR4_PIG	3074637		-6.6	DSYVGDEAQSKR	RT: 17.63
PEF-R1-1_SW_RA7_01_8012	Actin beta OS=Sus scrofa OX=9823 GN=ACTB PE=3 SV=2	tr|A0A287AAR4|A0A287AAR4_PIG	2815933		-7.2	DSYVGDEAQSKR	RT: 17.63
PEF-R1-1_SW_RA7_01_8012	Actin beta OS=Sus scrofa OX=9823 GN=ACTB PE=3 SV=2	tr|A0A287AAR4|A0A287AAR4_PIG	308009		0.4	EITALAPSTMK	RT: 71.74
PEF-R1-1_SW_RA7_01_8012	Actin beta OS=Sus scrofa OX=9823 GN=ACTB PE=3 SV=2	tr|A0A287AAR4|A0A287AAR4_PIG	421952		-1.2	EITALAPSTMK	RT: 67.01
PEF-R1-1_SW_RA7_01_8012	Actin beta OS=Sus scrofa OX=9823 GN=ACTB PE=3 SV=2	tr|A0A287AAR4|A0A287AAR4_PIG	323418		-1.4	EITALAPSTMKIK	RT: 74.93
PEF-R1-1_SW_RA7_01_8012	Actin beta OS=Sus scrofa OX=9823 GN=ACTB PE=3 SV=2	tr|A0A287AAR4|A0A287AAR4_PIG	256025		-0.7	EITALAPSTMKIK	RT: 74.93
PEF-R1-1_SW_RA7_01_8012	Actin beta OS=Sus scrofa OX=9823 GN=ACTB PE=3 SV=2	tr|A0A287AAR4|A0A287AAR4_PIG	55803		-1.6	EITALAPSTMKIK	RT: 86.75
PEF-R1-1_SW_RA7_01_8012	Actin beta OS=Sus scrofa OX=9823 GN=ACTB PE=3 SV=2	tr|A0A287AAR4|A0A287AAR4_PIG	49172		0.1	EKLCYVALDFEQEMATAASSSSLEK	RT: 124.63
PEF-R1-1_SW_RA7_01_8012	Actin beta OS=Sus scrofa OX=9823 GN=ACTB PE=3 SV=2	tr|A0A287AAR4|A0A287AAR4_PIG	22382		-0.1	EKMTQIMFETFNTPAMYVAIQAVLSLYASGR	RT: 194.52
PEF-R1-1_SW_RA7_01_8012	Actin beta OS=Sus scrofa OX=9823 GN=ACTB PE=3 SV=2	tr|A0A287AAR4|A0A287AAR4_PIG	30324		2.3	FRCPEALFQPSFLGMESCGIHETTFNSIMK	RT: 126.38
PEF-R1-1_SW_RA7_01_8012	Actin beta OS=Sus scrofa OX=9823 GN=ACTB PE=3 SV=2	tr|A0A287AAR4|A0A287AAR4_PIG	62016		1.2	FRCPEALFQPSFLGMESCGIHETTFNSIMK	RT: 120.54
PEF-R1-1_SW_RA7_01_8012	Actin beta OS=Sus scrofa OX=9823 GN=ACTB PE=3 SV=2	tr|A0A287AAR4|A0A287AAR4_PIG	70319		-2.7	FRCPEALFQPSFLGMESCGIHETTFNSIMK	RT: 120.67
PEF-R1-1_SW_RA7_01_8012	Actin beta OS=Sus scrofa OX=9823 GN=ACTB PE=3 SV=2	tr|A0A287AAR4|A0A287AAR4_PIG	667451		-1	GYSFTTTAER	RT: 52.42
PEF-R1-1_SW_RA7_01_8012	Actin beta OS=Sus scrofa OX=9823 GN=ACTB PE=3 SV=2	tr|A0A287AAR4|A0A287AAR4_PIG	1122102		-5.7	GYSFTTTAEREIVR	RT: 70.48
PEF-R1-1_SW_RA7_01_8012	Actin beta OS=Sus scrofa OX=9823 GN=ACTB PE=3 SV=2	tr|A0A287AAR4|A0A287AAR4_PIG	68381		1.1	HQGVMVGMGQK	RT: 37.1
PEF-R1-1_SW_RA7_01_8012	Actin beta OS=Sus scrofa OX=9823 GN=ACTB PE=3 SV=2	tr|A0A287AAR4|A0A287AAR4_PIG	66652		1	HQGVMVGMGQK	RT: 37.1
PEF-R1-1_SW_RA7_01_8012	Actin beta OS=Sus scrofa OX=9823 GN=ACTB PE=3 SV=2	tr|A0A287AAR4|A0A287AAR4_PIG	80598		0.8	HQGVMVGMGQK	RT: 37.1
PEF-R1-1_SW_RA7_01_8012	Actin beta OS=Sus scrofa OX=9823 GN=ACTB PE=3 SV=2	tr|A0A287AAR4|A0A287AAR4_PIG	405194		0.9	HQGVMVGMGQK	RT: 17.63
PEF-R1-1_SW_RA7_01_8012	Actin beta OS=Sus scrofa OX=9823 GN=ACTB PE=3 SV=2	tr|A0A287AAR4|A0A287AAR4_PIG	274968		2.6	HQGVMVGMGQK	RT: 17.63
PEF-R1-1_SW_RA7_01_8012	Actin beta OS=Sus scrofa OX=9823 GN=ACTB PE=3 SV=2	tr|A0A287AAR4|A0A287AAR4_PIG	38190		1.9	HQGVMVGMGQKDSYVGDEAQSK	RT: 57.85
PEF-R1-1_SW_RA7_01_8012	Actin beta OS=Sus scrofa OX=9823 GN=ACTB PE=3 SV=2	tr|A0A287AAR4|A0A287AAR4_PIG	36024		2	HQGVMVGMGQKDSYVGDEAQSK	RT: 57.85
PEF-R1-1_SW_RA7_01_8012	Actin beta OS=Sus scrofa OX=9823 GN=ACTB PE=3 SV=2	tr|A0A287AAR4|A0A287AAR4_PIG	53010		5.5	HQGVMVGMGQKDSYVGDEAQSK	RT: 54.77
PEF-R1-1_SW_RA7_01_8012	Actin beta OS=Sus scrofa OX=9823 GN=ACTB PE=3 SV=2	tr|A0A287AAR4|A0A287AAR4_PIG	39064		6.9	HQGVMVGMGQKDSYVGDEAQSK	RT: 54.77
PEF-R1-1_SW_RA7_01_8012	Actin beta OS=Sus scrofa OX=9823 GN=ACTB PE=3 SV=2	tr|A0A287AAR4|A0A287AAR4_PIG	36537		2.6	HQGVMVGMGQKDSYVGDEAQSK	RT: 37.52
PEF-R1-1_SW_RA7_01_8012	Actin beta OS=Sus scrofa OX=9823 GN=ACTB PE=3 SV=2	tr|A0A287AAR4|A0A287AAR4_PIG	33573		2.8	HQGVMVGMGQKDSYVGDEAQSK	RT: 37.52
PEF-R1-1_SW_RA7_01_8012	Actin beta OS=Sus scrofa OX=9823 GN=ACTB PE=3 SV=2	tr|A0A287AAR4|A0A287AAR4_PIG	30818		-5.2	HQGVMVGMGQKDSYVGDEAQSK	RT: 51.3
PEF-R1-1_SW_RA7_01_8012	Actin beta OS=Sus scrofa OX=9823 GN=ACTB PE=3 SV=2	tr|A0A287AAR4|A0A287AAR4_PIG	47804		-2.4	HQGVMVGMGQKDSYVGDEAQSK	RT: 51.3
PEF-R1-1_SW_RA7_01_8012	Actin beta OS=Sus scrofa OX=9823 GN=ACTB PE=3 SV=2	tr|A0A287AAR4|A0A287AAR4_PIG	854012		-6.7	KDLYANTVLSGGTTMYPGIADR	RT: 94.89
PEF-R1-1_SW_RA7_01_8012	Actin beta OS=Sus scrofa OX=9823 GN=ACTB PE=3 SV=2	tr|A0A287AAR4|A0A287AAR4_PIG	148922		-3.5	KDLYANTVLSGGTTMYPGIADR	RT: 88.5
PEF-R1-1_SW_RA7_01_8012	Actin beta OS=Sus scrofa OX=9823 GN=ACTB PE=3 SV=2	tr|A0A287AAR4|A0A287AAR4_PIG	45676		-1.5	LCYVALDFEQEMATAASSSSLEK	RT: 135.97
PEF-R1-1_SW_RA7_01_8012	Actin beta OS=Sus scrofa OX=9823 GN=ACTB PE=3 SV=2	tr|A0A287AAR4|A0A287AAR4_PIG	40983		-1.6	LCYVALDFEQEMATAASSSSLEKSYELPDGQVITIGNER	RT: 155.14
PEF-R1-1_SW_RA7_01_8012	Actin beta OS=Sus scrofa OX=9823 GN=ACTB PE=3 SV=2	tr|A0A287AAR4|A0A287AAR4_PIG	121353		1.5	LDLAGRDLTDYLMK	RT: 108.79
PEF-R1-1_SW_RA7_01_8012	Actin beta OS=Sus scrofa OX=9823 GN=ACTB PE=3 SV=2	tr|A0A287AAR4|A0A287AAR4_PIG	11647		3.5	LDLAGRDLTDYLMK	RT: 17.56
PEF-R1-1_SW_RA7_01_8012	Actin beta OS=Sus scrofa OX=9823 GN=ACTB PE=3 SV=2	tr|A0A287AAR4|A0A287AAR4_PIG	9481		-0.4	MDDDIAALVVDNGSGMCK	RT: 30.78
PEF-R1-1_SW_RA7_01_8012	Actin beta OS=Sus scrofa OX=9823 GN=ACTB PE=3 SV=2	tr|A0A287AAR4|A0A287AAR4_PIG	119415		-1.8	MDDDIAALVVDNGSGMCKAGFAGDDAPR	RT: 108.51
PEF-R1-1_SW_RA7_01_8012	Actin beta OS=Sus scrofa OX=9823 GN=ACTB PE=3 SV=2	tr|A0A287AAR4|A0A287AAR4_PIG	793896		5.7	MDDDIAALVVDNGSGMCKAGFAGDDAPR	RT: 84.8
PEF-R1-1_SW_RA7_01_8012	Actin beta OS=Sus scrofa OX=9823 GN=ACTB PE=3 SV=2	tr|A0A287AAR4|A0A287AAR4_PIG	2159578		-8.2	MDDDIAALVVDNGSGMCKAGFAGDDAPR	RT: 84.8
PEF-R1-1_SW_RA7_01_8012	Actin beta OS=Sus scrofa OX=9823 GN=ACTB PE=3 SV=2	tr|A0A287AAR4|A0A287AAR4_PIG	340803		-3.6	MDDDIAALVVDNGSGMCKAGFAGDDAPR	RT: 120.81
PEF-R1-1_SW_RA7_01_8012	Actin beta OS=Sus scrofa OX=9823 GN=ACTB PE=3 SV=2	tr|A0A287AAR4|A0A287AAR4_PIG	165642		3	MQKEITALAPSTMK	RT: 70.77
PEF-R1-1_SW_RA7_01_8012	Actin beta OS=Sus scrofa OX=9823 GN=ACTB PE=3 SV=2	tr|A0A287AAR4|A0A287AAR4_PIG	151582		0.7	MQKEITALAPSTMK	RT: 70.77
PEF-R1-1_SW_RA7_01_8012	Actin beta OS=Sus scrofa OX=9823 GN=ACTB PE=3 SV=2	tr|A0A287AAR4|A0A287AAR4_PIG	134634		3.8	MQKEITALAPSTMK	RT: 58.87
PEF-R1-1_SW_RA7_01_8012	Actin beta OS=Sus scrofa OX=9823 GN=ACTB PE=3 SV=2	tr|A0A287AAR4|A0A287AAR4_PIG	60553		2.6	MQKEITALAPSTMK	RT: 58.87
PEF-R1-1_SW_RA7_01_8012	Actin beta OS=Sus scrofa OX=9823 GN=ACTB PE=3 SV=2	tr|A0A287AAR4|A0A287AAR4_PIG	4142684		1.7	MQKEITALAPSTMK	RT: 84.59
PEF-R1-1_SW_RA7_01_8012	Actin beta OS=Sus scrofa OX=9823 GN=ACTB PE=3 SV=2	tr|A0A287AAR4|A0A287AAR4_PIG	4343096		1.3	MQKEITALAPSTMK	RT: 84.59
PEF-R1-1_SW_RA7_01_8012	Actin beta OS=Sus scrofa OX=9823 GN=ACTB PE=3 SV=2	tr|A0A287AAR4|A0A287AAR4_PIG	94316		-1	MQKEITALAPSTMK	RT: 65.97
PEF-R1-1_SW_RA7_01_8012	Actin beta OS=Sus scrofa OX=9823 GN=ACTB PE=3 SV=2	tr|A0A287AAR4|A0A287AAR4_PIG	115824		1.5	MQKEITALAPSTMK	RT: 65.97
PEF-R1-1_SW_RA7_01_8012	Actin beta OS=Sus scrofa OX=9823 GN=ACTB PE=3 SV=2	tr|A0A287AAR4|A0A287AAR4_PIG	24111		-1.5	MTQIMFETFNTPAMYVAIQAVLSLYASGR	RT: 197.02
PEF-R1-1_SW_RA7_01_8012	Actin beta OS=Sus scrofa OX=9823 GN=ACTB PE=3 SV=2	tr|A0A287AAR4|A0A287AAR4_PIG	46322		-0.6	RGILTLK	RT: 39.26
PEF-R1-1_SW_RA7_01_8012	Actin beta OS=Sus scrofa OX=9823 GN=ACTB PE=3 SV=2	tr|A0A287AAR4|A0A287AAR4_PIG	34371		-0.1	SYELPDGQVITIGNER	RT: 94.68
PEF-R1-1_SW_RA7_01_8012	Actin beta OS=Sus scrofa OX=9823 GN=ACTB PE=3 SV=2	tr|A0A287AAR4|A0A287AAR4_PIG	366529		-0.8	SYELPDGQVITIGNER	RT: 94.68
PEF-R1-1_SW_RA7_01_8012	Actin beta OS=Sus scrofa OX=9823 GN=ACTB PE=3 SV=2	tr|A0A287AAR4|A0A287AAR4_PIG	43966		2.9	SYELPDGQVITIGNERFR	RT: 98.78
PEF-R1-1_SW_RA7_01_8012	Actin beta OS=Sus scrofa OX=9823 GN=ACTB PE=3 SV=2	tr|A0A287AAR4|A0A287AAR4_PIG	467837		-4.4	TTGIVMDSGDGVTHTVPIYEGYALPHAILR	RT: 119.23
PEF-R1-1_SW_RA7_01_8012	Actin beta OS=Sus scrofa OX=9823 GN=ACTB PE=3 SV=2	tr|A0A287AAR4|A0A287AAR4_PIG	505438		-3.8	TTGIVMDSGDGVTHTVPIYEGYALPHAILR	RT: 119.23
PEF-R1-1_SW_RA7_01_8012	Actin beta OS=Sus scrofa OX=9823 GN=ACTB PE=3 SV=2	tr|A0A287AAR4|A0A287AAR4_PIG	2442982		-8.9	TTGIVMDSGDGVTHTVPIYEGYALPHAILR	RT: 84.73
PEF-R1-1_SW_RA7_01_8012	Actin beta OS=Sus scrofa OX=9823 GN=ACTB PE=3 SV=2	tr|A0A287AAR4|A0A287AAR4_PIG	7581		-7.8	VAPEEHPVLLTEAPLNPK	RT: 84.6
PEF-R1-1_SW_RA7_01_8012	Actin beta OS=Sus scrofa OX=9823 GN=ACTB PE=3 SV=2	tr|A0A287AAR4|A0A287AAR4_PIG	3165647		-8.3	VAPEEHPVLLTEAPLNPK	RT: 84.6
PEF-R1-1_SW_RA7_01_8012	Actin beta OS=Sus scrofa OX=9823 GN=ACTB PE=3 SV=2	tr|A0A287AAR4|A0A287AAR4_PIG	137161		-2.7	VAPEEHPVLLTEAPLNPKANR	RT: 72.85
PEF-R1-1_SW_RA7_01_8012	Actin beta OS=Sus scrofa OX=9823 GN=ACTB PE=3 SV=2	tr|A0A287AAR4|A0A287AAR4_PIG	1368076		-7.6	VAPEEHPVLLTEAPLNPKANR	RT: 72.85
PEF-R1-1_SW_RA7_01_8012	Actin beta OS=Sus scrofa OX=9823 GN=ACTB PE=3 SV=2	tr|A0A287AAR4|A0A287AAR4_PIG	135850		1.3	YPIEHGIVTNWDDMEK	RT: 70.35
PEF-R2-1_SW_RB4_01_8018	Actin beta OS=Sus scrofa OX=9823 GN=ACTB PE=3 SV=2	tr|A0A287AAR4|A0A287AAR4_PIG	1096737		-3.2	AGFAGDDAPR	RT: 17.78
PEF-R2-1_SW_RB4_01_8018	Actin beta OS=Sus scrofa OX=9823 GN=ACTB PE=3 SV=2	tr|A0A287AAR4|A0A287AAR4_PIG	19589		-0.2	AGFAGDDAPRAVFPSIVGRPR	RT: 83.59
PEF-R2-1_SW_RB4_01_8018	Actin beta OS=Sus scrofa OX=9823 GN=ACTB PE=3 SV=2	tr|A0A287AAR4|A0A287AAR4_PIG	20501		-0.2	AGFAGDDAPRAVFPSIVGRPR	RT: 83.59
PEF-R2-1_SW_RB4_01_8018	Actin beta OS=Sus scrofa OX=9823 GN=ACTB PE=3 SV=2	tr|A0A287AAR4|A0A287AAR4_PIG	4237		-1.4	AVFPSIVGRPR	RT: 62.11
PEF-R2-1_SW_RB4_01_8018	Actin beta OS=Sus scrofa OX=9823 GN=ACTB PE=3 SV=2	tr|A0A287AAR4|A0A287AAR4_PIG	65949		-2.9	AVFPSIVGRPR	RT: 62.11
PEF-R2-1_SW_RB4_01_8018	Actin beta OS=Sus scrofa OX=9823 GN=ACTB PE=3 SV=2	tr|A0A287AAR4|A0A287AAR4_PIG	7714		2.9	CPEALFQPSFLGMESCGIHETTFNSIMK	RT: 141.05
PEF-R2-1_SW_RB4_01_8018	Actin beta OS=Sus scrofa OX=9823 GN=ACTB PE=3 SV=2	tr|A0A287AAR4|A0A287AAR4_PIG	17575		-1.6	DLTDYLMK	RT: 98.34
PEF-R2-1_SW_RB4_01_8018	Actin beta OS=Sus scrofa OX=9823 GN=ACTB PE=3 SV=2	tr|A0A287AAR4|A0A287AAR4_PIG	264898		-2	DLTDYLMKILTER	RT: 78.24
PEF-R2-1_SW_RB4_01_8018	Actin beta OS=Sus scrofa OX=9823 GN=ACTB PE=3 SV=2	tr|A0A287AAR4|A0A287AAR4_PIG	646		-1.9	DLYANTVLSGGTTMYPGIADR	RT: 126.44
PEF-R2-1_SW_RB4_01_8018	Actin beta OS=Sus scrofa OX=9823 GN=ACTB PE=3 SV=2	tr|A0A287AAR4|A0A287AAR4_PIG	4427		-0.4	DLYANTVLSGGTTMYPGIADR	RT: 126.44
PEF-R2-1_SW_RB4_01_8018	Actin beta OS=Sus scrofa OX=9823 GN=ACTB PE=3 SV=2	tr|A0A287AAR4|A0A287AAR4_PIG	1496231		9.3	DLYANTVLSGGTTMYPGIADR	RT: 85.12
PEF-R2-1_SW_RB4_01_8018	Actin beta OS=Sus scrofa OX=9823 GN=ACTB PE=3 SV=2	tr|A0A287AAR4|A0A287AAR4_PIG	24605		-0.8	DLYANTVLSGGTTMYPGIADR	RT: 85.12
PEF-R2-1_SW_RB4_01_8018	Actin beta OS=Sus scrofa OX=9823 GN=ACTB PE=3 SV=2	tr|A0A287AAR4|A0A287AAR4_PIG	87305		-4.2	DSYVGDEAQSK	RT: 52.85
PEF-R2-1_SW_RB4_01_8018	Actin beta OS=Sus scrofa OX=9823 GN=ACTB PE=3 SV=2	tr|A0A287AAR4|A0A287AAR4_PIG	112955		-3.3	DSYVGDEAQSK	RT: 52.85
PEF-R2-1_SW_RB4_01_8018	Actin beta OS=Sus scrofa OX=9823 GN=ACTB PE=3 SV=2	tr|A0A287AAR4|A0A287AAR4_PIG	1124572		-3.5	DSYVGDEAQSKR	RT: 17.78
PEF-R2-1_SW_RB4_01_8018	Actin beta OS=Sus scrofa OX=9823 GN=ACTB PE=3 SV=2	tr|A0A287AAR4|A0A287AAR4_PIG	966682		-3.8	DSYVGDEAQSKR	RT: 17.78
PEF-R2-1_SW_RB4_01_8018	Actin beta OS=Sus scrofa OX=9823 GN=ACTB PE=3 SV=2	tr|A0A287AAR4|A0A287AAR4_PIG	149378		-1.1	EITALAPSTMK	RT: 71.28
PEF-R2-1_SW_RB4_01_8018	Actin beta OS=Sus scrofa OX=9823 GN=ACTB PE=3 SV=2	tr|A0A287AAR4|A0A287AAR4_PIG	163419		-2.5	EITALAPSTMK	RT: 63.44
PEF-R2-1_SW_RB4_01_8018	Actin beta OS=Sus scrofa OX=9823 GN=ACTB PE=3 SV=2	tr|A0A287AAR4|A0A287AAR4_PIG	131157		-1.9	EITALAPSTMKIK	RT: 76.01
PEF-R2-1_SW_RB4_01_8018	Actin beta OS=Sus scrofa OX=9823 GN=ACTB PE=3 SV=2	tr|A0A287AAR4|A0A287AAR4_PIG	84683		-2.7	EITALAPSTMKIK	RT: 76.01
PEF-R2-1_SW_RB4_01_8018	Actin beta OS=Sus scrofa OX=9823 GN=ACTB PE=3 SV=2	tr|A0A287AAR4|A0A287AAR4_PIG	17556		-3.8	EITALAPSTMKIK	RT: 53.4
PEF-R2-1_SW_RB4_01_8018	Actin beta OS=Sus scrofa OX=9823 GN=ACTB PE=3 SV=2	tr|A0A287AAR4|A0A287AAR4_PIG	1634		-3.2	EKLCYVALDFEQEMATAASSSSLEK	RT: 123.03
PEF-R2-1_SW_RB4_01_8018	Actin beta OS=Sus scrofa OX=9823 GN=ACTB PE=3 SV=2	tr|A0A287AAR4|A0A287AAR4_PIG	1862		1.8	EKMTQIMFETFNTPAMYVAIQAVLSLYASGR	RT: 197.15
PEF-R2-1_SW_RB4_01_8018	Actin beta OS=Sus scrofa OX=9823 GN=ACTB PE=3 SV=2	tr|A0A287AAR4|A0A287AAR4_PIG	2641		3.3	FRCPEALFQPSFLGMESCGIHETTFNSIMK	RT: 124.63
PEF-R2-1_SW_RB4_01_8018	Actin beta OS=Sus scrofa OX=9823 GN=ACTB PE=3 SV=2	tr|A0A287AAR4|A0A287AAR4_PIG	1140		2.3	FRCPEALFQPSFLGMESCGIHETTFNSIMK	RT: 124.64
PEF-R2-1_SW_RB4_01_8018	Actin beta OS=Sus scrofa OX=9823 GN=ACTB PE=3 SV=2	tr|A0A287AAR4|A0A287AAR4_PIG	1843		3.4	FRCPEALFQPSFLGMESCGIHETTFNSIMK	RT: 124.64
PEF-R2-1_SW_RB4_01_8018	Actin beta OS=Sus scrofa OX=9823 GN=ACTB PE=3 SV=2	tr|A0A287AAR4|A0A287AAR4_PIG	519194		-7.6	GYSFTTTAER	RT: 49.86
PEF-R2-1_SW_RB4_01_8018	Actin beta OS=Sus scrofa OX=9823 GN=ACTB PE=3 SV=2	tr|A0A287AAR4|A0A287AAR4_PIG	79534		-3.9	GYSFTTTAEREIVR	RT: 71.3
PEF-R2-1_SW_RB4_01_8018	Actin beta OS=Sus scrofa OX=9823 GN=ACTB PE=3 SV=2	tr|A0A287AAR4|A0A287AAR4_PIG	75278		-4.3	HQGVMVGMGQK	RT: 40.25
PEF-R2-1_SW_RB4_01_8018	Actin beta OS=Sus scrofa OX=9823 GN=ACTB PE=3 SV=2	tr|A0A287AAR4|A0A287AAR4_PIG	42465		-5.3	HQGVMVGMGQK	RT: 23.55
PEF-R2-1_SW_RB4_01_8018	Actin beta OS=Sus scrofa OX=9823 GN=ACTB PE=3 SV=2	tr|A0A287AAR4|A0A287AAR4_PIG	62700		6.8	HQGVMVGMGQK	RT: 24.45
PEF-R2-1_SW_RB4_01_8018	Actin beta OS=Sus scrofa OX=9823 GN=ACTB PE=3 SV=2	tr|A0A287AAR4|A0A287AAR4_PIG	167314		0.1	HQGVMVGMGQK	RT: 17.77
PEF-R2-1_SW_RB4_01_8018	Actin beta OS=Sus scrofa OX=9823 GN=ACTB PE=3 SV=2	tr|A0A287AAR4|A0A287AAR4_PIG	181944		-0.9	HQGVMVGMGQK	RT: 17.77
PEF-R2-1_SW_RB4_01_8018	Actin beta OS=Sus scrofa OX=9823 GN=ACTB PE=3 SV=2	tr|A0A287AAR4|A0A287AAR4_PIG	121866		-3.5	HQGVMVGMGQKDSYVGDEAQSK	RT: 50.48
PEF-R2-1_SW_RB4_01_8018	Actin beta OS=Sus scrofa OX=9823 GN=ACTB PE=3 SV=2	tr|A0A287AAR4|A0A287AAR4_PIG	143526		-2.6	HQGVMVGMGQKDSYVGDEAQSK	RT: 50.48
PEF-R2-1_SW_RB4_01_8018	Actin beta OS=Sus scrofa OX=9823 GN=ACTB PE=3 SV=2	tr|A0A287AAR4|A0A287AAR4_PIG	71573		1.3	HQGVMVGMGQKDSYVGDEAQSK	RT: 47.77
PEF-R2-1_SW_RB4_01_8018	Actin beta OS=Sus scrofa OX=9823 GN=ACTB PE=3 SV=2	tr|A0A287AAR4|A0A287AAR4_PIG	55233		3.2	HQGVMVGMGQKDSYVGDEAQSK	RT: 47.77
PEF-R2-1_SW_RB4_01_8018	Actin beta OS=Sus scrofa OX=9823 GN=ACTB PE=3 SV=2	tr|A0A287AAR4|A0A287AAR4_PIG	10621		-1.9	HQGVMVGMGQKDSYVGDEAQSK	RT: 49.72
PEF-R2-1_SW_RB4_01_8018	Actin beta OS=Sus scrofa OX=9823 GN=ACTB PE=3 SV=2	tr|A0A287AAR4|A0A287AAR4_PIG	71345		-4.5	HQGVMVGMGQKDSYVGDEAQSK	RT: 49.72
PEF-R2-1_SW_RB4_01_8018	Actin beta OS=Sus scrofa OX=9823 GN=ACTB PE=3 SV=2	tr|A0A287AAR4|A0A287AAR4_PIG	15523		-1.5	HQGVMVGMGQKDSYVGDEAQSK	RT: 47.77
PEF-R2-1_SW_RB4_01_8018	Actin beta OS=Sus scrofa OX=9823 GN=ACTB PE=3 SV=2	tr|A0A287AAR4|A0A287AAR4_PIG	78812		1.7	HQGVMVGMGQKDSYVGDEAQSK	RT: 47.77
PEF-R2-1_SW_RB4_01_8018	Actin beta OS=Sus scrofa OX=9823 GN=ACTB PE=3 SV=2	tr|A0A287AAR4|A0A287AAR4_PIG	86925		-7	KDLYANTVLSGGTTMYPGIADR	RT: 91.25
PEF-R2-1_SW_RB4_01_8018	Actin beta OS=Sus scrofa OX=9823 GN=ACTB PE=3 SV=2	tr|A0A287AAR4|A0A287AAR4_PIG	50236		-3.3	KDLYANTVLSGGTTMYPGIADR	RT: 90.35
PEF-R2-1_SW_RB4_01_8018	Actin beta OS=Sus scrofa OX=9823 GN=ACTB PE=3 SV=2	tr|A0A287AAR4|A0A287AAR4_PIG	3040		-0.8	LCYVALDFEQEMATAASSSSLEK	RT: 138.92
PEF-R2-1_SW_RB4_01_8018	Actin beta OS=Sus scrofa OX=9823 GN=ACTB PE=3 SV=2	tr|A0A287AAR4|A0A287AAR4_PIG	2546		5.1	LCYVALDFEQEMATAASSSSLEKSYELPDGQVITIGNER	RT: 154.53
PEF-R2-1_SW_RB4_01_8018	Actin beta OS=Sus scrofa OX=9823 GN=ACTB PE=3 SV=2	tr|A0A287AAR4|A0A287AAR4_PIG	1824		0.6	LDLAGRDLTDYLMK	RT: 113.58
PEF-R2-1_SW_RB4_01_8018	Actin beta OS=Sus scrofa OX=9823 GN=ACTB PE=3 SV=2	tr|A0A287AAR4|A0A287AAR4_PIG	99446		0	LDLAGRDLTDYLMK	RT: 17.63
PEF-R2-1_SW_RB4_01_8018	Actin beta OS=Sus scrofa OX=9823 GN=ACTB PE=3 SV=2	tr|A0A287AAR4|A0A287AAR4_PIG	12768		0.5	MDDDIAALVVDNGSGMCK	RT: 28.07
PEF-R2-1_SW_RB4_01_8018	Actin beta OS=Sus scrofa OX=9823 GN=ACTB PE=3 SV=2	tr|A0A287AAR4|A0A287AAR4_PIG	1273		2.9	MDDDIAALVVDNGSGMCKAGFAGDDAPR	RT: 108.77
PEF-R2-1_SW_RB4_01_8018	Actin beta OS=Sus scrofa OX=9823 GN=ACTB PE=3 SV=2	tr|A0A287AAR4|A0A287AAR4_PIG	783408		3.7	MDDDIAALVVDNGSGMCKAGFAGDDAPR	RT: 84.63
PEF-R2-1_SW_RB4_01_8018	Actin beta OS=Sus scrofa OX=9823 GN=ACTB PE=3 SV=2	tr|A0A287AAR4|A0A287AAR4_PIG	12255		-1.4	MDDDIAALVVDNGSGMCKAGFAGDDAPR	RT: 84.63
PEF-R2-1_SW_RB4_01_8018	Actin beta OS=Sus scrofa OX=9823 GN=ACTB PE=3 SV=2	tr|A0A287AAR4|A0A287AAR4_PIG	12426		-2.6	MDDDIAALVVDNGSGMCKAGFAGDDAPR	RT: 94.79
PEF-R2-1_SW_RB4_01_8018	Actin beta OS=Sus scrofa OX=9823 GN=ACTB PE=3 SV=2	tr|A0A287AAR4|A0A287AAR4_PIG	39767		1.9	MQKEITALAPSTMK	RT: 65.65
PEF-R2-1_SW_RB4_01_8018	Actin beta OS=Sus scrofa OX=9823 GN=ACTB PE=3 SV=2	tr|A0A287AAR4|A0A287AAR4_PIG	38589		2.1	MQKEITALAPSTMK	RT: 65.65
PEF-R2-1_SW_RB4_01_8018	Actin beta OS=Sus scrofa OX=9823 GN=ACTB PE=3 SV=2	tr|A0A287AAR4|A0A287AAR4_PIG	72143		-6.4	MQKEITALAPSTMK	RT: 59.45
PEF-R2-1_SW_RB4_01_8018	Actin beta OS=Sus scrofa OX=9823 GN=ACTB PE=3 SV=2	tr|A0A287AAR4|A0A287AAR4_PIG	83296		-6.2	MQKEITALAPSTMK	RT: 59.45
PEF-R2-1_SW_RB4_01_8018	Actin beta OS=Sus scrofa OX=9823 GN=ACTB PE=3 SV=2	tr|A0A287AAR4|A0A287AAR4_PIG	2229289		-0.5	MQKEITALAPSTMK	RT: 84.56
PEF-R2-1_SW_RB4_01_8018	Actin beta OS=Sus scrofa OX=9823 GN=ACTB PE=3 SV=2	tr|A0A287AAR4|A0A287AAR4_PIG	2315112		-0.4	MQKEITALAPSTMK	RT: 84.56
PEF-R2-1_SW_RB4_01_8018	Actin beta OS=Sus scrofa OX=9823 GN=ACTB PE=3 SV=2	tr|A0A287AAR4|A0A287AAR4_PIG	122303		-3.6	MQKEITALAPSTMK	RT: 55.21
PEF-R2-1_SW_RB4_01_8018	Actin beta OS=Sus scrofa OX=9823 GN=ACTB PE=3 SV=2	tr|A0A287AAR4|A0A287AAR4_PIG	23959		1.5	MQKEITALAPSTMK	RT: 55.21
PEF-R2-1_SW_RB4_01_8018	Actin beta OS=Sus scrofa OX=9823 GN=ACTB PE=3 SV=2	tr|A0A287AAR4|A0A287AAR4_PIG	3876		2.6	MTQIMFETFNTPAMYVAIQAVLSLYASGR	RT: 197.15
PEF-R2-1_SW_RB4_01_8018	Actin beta OS=Sus scrofa OX=9823 GN=ACTB PE=3 SV=2	tr|A0A287AAR4|A0A287AAR4_PIG	51186		-3.2	RGILTLK	RT: 39.91
PEF-R2-1_SW_RB4_01_8018	Actin beta OS=Sus scrofa OX=9823 GN=ACTB PE=3 SV=2	tr|A0A287AAR4|A0A287AAR4_PIG	2869		-1	SYELPDGQVITIGNER	RT: 94.8
PEF-R2-1_SW_RB4_01_8018	Actin beta OS=Sus scrofa OX=9823 GN=ACTB PE=3 SV=2	tr|A0A287AAR4|A0A287AAR4_PIG	107882		-4.5	SYELPDGQVITIGNER	RT: 94.8
PEF-R2-1_SW_RB4_01_8018	Actin beta OS=Sus scrofa OX=9823 GN=ACTB PE=3 SV=2	tr|A0A287AAR4|A0A287AAR4_PIG	9215		-5.1	SYELPDGQVITIGNERFR	RT: 98.28
PEF-R2-1_SW_RB4_01_8018	Actin beta OS=Sus scrofa OX=9823 GN=ACTB PE=3 SV=2	tr|A0A287AAR4|A0A287AAR4_PIG	3154		0.5	TTGIVMDSGDGVTHTVPIYEGYALPHAILR	RT: 114.5
PEF-R2-1_SW_RB4_01_8018	Actin beta OS=Sus scrofa OX=9823 GN=ACTB PE=3 SV=2	tr|A0A287AAR4|A0A287AAR4_PIG	3154		0.5	TTGIVMDSGDGVTHTVPIYEGYALPHAILR	RT: 114.5
PEF-R2-1_SW_RB4_01_8018	Actin beta OS=Sus scrofa OX=9823 GN=ACTB PE=3 SV=2	tr|A0A287AAR4|A0A287AAR4_PIG	817266		-5.9	TTGIVMDSGDGVTHTVPIYEGYALPHAILR	RT: 53.41
PEF-R2-1_SW_RB4_01_8018	Actin beta OS=Sus scrofa OX=9823 GN=ACTB PE=3 SV=2	tr|A0A287AAR4|A0A287AAR4_PIG	31388		-3.3	VAPEEHPVLLTEAPLNPK	RT: 84.63
PEF-R2-1_SW_RB4_01_8018	Actin beta OS=Sus scrofa OX=9823 GN=ACTB PE=3 SV=2	tr|A0A287AAR4|A0A287AAR4_PIG	135831		-5.2	VAPEEHPVLLTEAPLNPK	RT: 84.63
PEF-R2-1_SW_RB4_01_8018	Actin beta OS=Sus scrofa OX=9823 GN=ACTB PE=3 SV=2	tr|A0A287AAR4|A0A287AAR4_PIG	360677		-2.5	VAPEEHPVLLTEAPLNPKANR	RT: 85.2
PEF-R2-1_SW_RB4_01_8018	Actin beta OS=Sus scrofa OX=9823 GN=ACTB PE=3 SV=2	tr|A0A287AAR4|A0A287AAR4_PIG	363071		-2.4	VAPEEHPVLLTEAPLNPKANR	RT: 85.2
PEF-R2-1_SW_RB4_01_8018	Actin beta OS=Sus scrofa OX=9823 GN=ACTB PE=3 SV=2	tr|A0A287AAR4|A0A287AAR4_PIG	63460		-0.4	YPIEHGIVTNWDDMEK	RT: 74.21
PEF-R3-1_SW_RC1_01_8030	Actin beta OS=Sus scrofa OX=9823 GN=ACTB PE=3 SV=2	tr|A0A287AAR4|A0A287AAR4_PIG	149530		-2.5	AGFAGDDAPR	RT: 58.2
PEF-R3-1_SW_RC1_01_8030	Actin beta OS=Sus scrofa OX=9823 GN=ACTB PE=3 SV=2	tr|A0A287AAR4|A0A287AAR4_PIG	19684		-7.8	AGFAGDDAPRAVFPSIVGRPR	RT: 84.06
PEF-R3-1_SW_RC1_01_8030	Actin beta OS=Sus scrofa OX=9823 GN=ACTB PE=3 SV=2	tr|A0A287AAR4|A0A287AAR4_PIG	22743		-7.3	AGFAGDDAPRAVFPSIVGRPR	RT: 84.06
PEF-R3-1_SW_RC1_01_8030	Actin beta OS=Sus scrofa OX=9823 GN=ACTB PE=3 SV=2	tr|A0A287AAR4|A0A287AAR4_PIG	34618		-7.4	AVFPSIVGRPR	RT: 69.59
PEF-R3-1_SW_RC1_01_8030	Actin beta OS=Sus scrofa OX=9823 GN=ACTB PE=3 SV=2	tr|A0A287AAR4|A0A287AAR4_PIG	34618		-7.4	AVFPSIVGRPR	RT: 69.59
PEF-R3-1_SW_RC1_01_8030	Actin beta OS=Sus scrofa OX=9823 GN=ACTB PE=3 SV=2	tr|A0A287AAR4|A0A287AAR4_PIG	56620		1.5	CPEALFQPSFLGMESCGIHETTFNSIMK	RT: 133.83
PEF-R3-1_SW_RC1_01_8030	Actin beta OS=Sus scrofa OX=9823 GN=ACTB PE=3 SV=2	tr|A0A287AAR4|A0A287AAR4_PIG	58463		-0.7	DLTDYLMK	RT: 99.91
PEF-R3-1_SW_RC1_01_8030	Actin beta OS=Sus scrofa OX=9823 GN=ACTB PE=3 SV=2	tr|A0A287AAR4|A0A287AAR4_PIG	92321		-5.6	DLTDYLMKILTER	RT: 77.11
PEF-R3-1_SW_RC1_01_8030	Actin beta OS=Sus scrofa OX=9823 GN=ACTB PE=3 SV=2	tr|A0A287AAR4|A0A287AAR4_PIG	34162		-2.1	DLYANTVLSGGTTMYPGIADR	RT: 126.6
PEF-R3-1_SW_RC1_01_8030	Actin beta OS=Sus scrofa OX=9823 GN=ACTB PE=3 SV=2	tr|A0A287AAR4|A0A287AAR4_PIG	5339		2.2	DLYANTVLSGGTTMYPGIADR	RT: 126.6
PEF-R3-1_SW_RC1_01_8030	Actin beta OS=Sus scrofa OX=9823 GN=ACTB PE=3 SV=2	tr|A0A287AAR4|A0A287AAR4_PIG	1745397		-4.8	DLYANTVLSGGTTMYPGIADR	RT: 84.47
PEF-R3-1_SW_RC1_01_8030	Actin beta OS=Sus scrofa OX=9823 GN=ACTB PE=3 SV=2	tr|A0A287AAR4|A0A287AAR4_PIG	27645		-0.5	DLYANTVLSGGTTMYPGIADR	RT: 84.47
PEF-R3-1_SW_RC1_01_8030	Actin beta OS=Sus scrofa OX=9823 GN=ACTB PE=3 SV=2	tr|A0A287AAR4|A0A287AAR4_PIG	4446		5.1	DSYVGDEAQSK	RT: 38.16
PEF-R3-1_SW_RC1_01_8030	Actin beta OS=Sus scrofa OX=9823 GN=ACTB PE=3 SV=2	tr|A0A287AAR4|A0A287AAR4_PIG	28633		-0.9	DSYVGDEAQSK	RT: 38.16
PEF-R3-1_SW_RC1_01_8030	Actin beta OS=Sus scrofa OX=9823 GN=ACTB PE=3 SV=2	tr|A0A287AAR4|A0A287AAR4_PIG	91352		-5.5	DSYVGDEAQSKR	RT: 29.67
PEF-R3-1_SW_RC1_01_8030	Actin beta OS=Sus scrofa OX=9823 GN=ACTB PE=3 SV=2	tr|A0A287AAR4|A0A287AAR4_PIG	89965		-5.5	DSYVGDEAQSKR	RT: 29.67
PEF-R3-1_SW_RC1_01_8030	Actin beta OS=Sus scrofa OX=9823 GN=ACTB PE=3 SV=2	tr|A0A287AAR4|A0A287AAR4_PIG	127642		-0.2	EITALAPSTMK	RT: 65.76
PEF-R3-1_SW_RC1_01_8030	Actin beta OS=Sus scrofa OX=9823 GN=ACTB PE=3 SV=2	tr|A0A287AAR4|A0A287AAR4_PIG	186409		-1	EITALAPSTMK	RT: 53.32
PEF-R3-1_SW_RC1_01_8030	Actin beta OS=Sus scrofa OX=9823 GN=ACTB PE=3 SV=2	tr|A0A287AAR4|A0A287AAR4_PIG	105659		-3.1	EITALAPSTMKIK	RT: 73.02
PEF-R3-1_SW_RC1_01_8030	Actin beta OS=Sus scrofa OX=9823 GN=ACTB PE=3 SV=2	tr|A0A287AAR4|A0A287AAR4_PIG	532		2.4	EITALAPSTMKIK	RT: 73.02
PEF-R3-1_SW_RC1_01_8030	Actin beta OS=Sus scrofa OX=9823 GN=ACTB PE=3 SV=2	tr|A0A287AAR4|A0A287AAR4_PIG	12388		-3.7	EITALAPSTMKIK	RT: 63.33
PEF-R3-1_SW_RC1_01_8030	Actin beta OS=Sus scrofa OX=9823 GN=ACTB PE=3 SV=2	tr|A0A287AAR4|A0A287AAR4_PIG	20748		-2.5	EKLCYVALDFEQEMATAASSSSLEK	RT: 123.35
PEF-R3-1_SW_RC1_01_8030	Actin beta OS=Sus scrofa OX=9823 GN=ACTB PE=3 SV=2	tr|A0A287AAR4|A0A287AAR4_PIG	12350		-0.2	EKMTQIMFETFNTPAMYVAIQAVLSLYASGR	RT: 196.91
PEF-R3-1_SW_RC1_01_8030	Actin beta OS=Sus scrofa OX=9823 GN=ACTB PE=3 SV=2	tr|A0A287AAR4|A0A287AAR4_PIG	15048		0.1	FRCPEALFQPSFLGMESCGIHETTFNSIMK	RT: 121.67
PEF-R3-1_SW_RC1_01_8030	Actin beta OS=Sus scrofa OX=9823 GN=ACTB PE=3 SV=2	tr|A0A287AAR4|A0A287AAR4_PIG	10507		1	FRCPEALFQPSFLGMESCGIHETTFNSIMK	RT: 121.68
PEF-R3-1_SW_RC1_01_8030	Actin beta OS=Sus scrofa OX=9823 GN=ACTB PE=3 SV=2	tr|A0A287AAR4|A0A287AAR4_PIG	13224		0.5	FRCPEALFQPSFLGMESCGIHETTFNSIMK	RT: 121.68
PEF-R3-1_SW_RC1_01_8030	Actin beta OS=Sus scrofa OX=9823 GN=ACTB PE=3 SV=2	tr|A0A287AAR4|A0A287AAR4_PIG	139517		1.1	GYSFTTTAER	RT: 53.26
PEF-R3-1_SW_RC1_01_8030	Actin beta OS=Sus scrofa OX=9823 GN=ACTB PE=3 SV=2	tr|A0A287AAR4|A0A287AAR4_PIG	44897		1.3	GYSFTTTAEREIVR	RT: 66.52
PEF-R3-1_SW_RC1_01_8030	Actin beta OS=Sus scrofa OX=9823 GN=ACTB PE=3 SV=2	tr|A0A287AAR4|A0A287AAR4_PIG	63688		-0.7	HQGVMVGMGQK	RT: 37.6
PEF-R3-1_SW_RC1_01_8030	Actin beta OS=Sus scrofa OX=9823 GN=ACTB PE=3 SV=2	tr|A0A287AAR4|A0A287AAR4_PIG	47481		-4.6	HQGVMVGMGQK	RT: 37.11
PEF-R3-1_SW_RC1_01_8030	Actin beta OS=Sus scrofa OX=9823 GN=ACTB PE=3 SV=2	tr|A0A287AAR4|A0A287AAR4_PIG	66253		-0.2	HQGVMVGMGQK	RT: 37.6
PEF-R3-1_SW_RC1_01_8030	Actin beta OS=Sus scrofa OX=9823 GN=ACTB PE=3 SV=2	tr|A0A287AAR4|A0A287AAR4_PIG	108243		-7.3	HQGVMVGMGQK	RT: 17.91
PEF-R3-1_SW_RC1_01_8030	Actin beta OS=Sus scrofa OX=9823 GN=ACTB PE=3 SV=2	tr|A0A287AAR4|A0A287AAR4_PIG	113791		-6.7	HQGVMVGMGQK	RT: 17.91
PEF-R3-1_SW_RC1_01_8030	Actin beta OS=Sus scrofa OX=9823 GN=ACTB PE=3 SV=2	tr|A0A287AAR4|A0A287AAR4_PIG	45600		1.8	HQGVMVGMGQKDSYVGDEAQSK	RT: 48.95
PEF-R3-1_SW_RC1_01_8030	Actin beta OS=Sus scrofa OX=9823 GN=ACTB PE=3 SV=2	tr|A0A287AAR4|A0A287AAR4_PIG	67773		2.1	HQGVMVGMGQKDSYVGDEAQSK	RT: 48.95
PEF-R3-1_SW_RC1_01_8030	Actin beta OS=Sus scrofa OX=9823 GN=ACTB PE=3 SV=2	tr|A0A287AAR4|A0A287AAR4_PIG	128516		5.6	HQGVMVGMGQKDSYVGDEAQSK	RT: 49.16
PEF-R3-1_SW_RC1_01_8030	Actin beta OS=Sus scrofa OX=9823 GN=ACTB PE=3 SV=2	tr|A0A287AAR4|A0A287AAR4_PIG	99237		5.7	HQGVMVGMGQKDSYVGDEAQSK	RT: 49.16
PEF-R3-1_SW_RC1_01_8030	Actin beta OS=Sus scrofa OX=9823 GN=ACTB PE=3 SV=2	tr|A0A287AAR4|A0A287AAR4_PIG	50749		-3.5	HQGVMVGMGQKDSYVGDEAQSK	RT: 46.99
PEF-R3-1_SW_RC1_01_8030	Actin beta OS=Sus scrofa OX=9823 GN=ACTB PE=3 SV=2	tr|A0A287AAR4|A0A287AAR4_PIG	58102		-5.2	HQGVMVGMGQKDSYVGDEAQSK	RT: 46.99
PEF-R3-1_SW_RC1_01_8030	Actin beta OS=Sus scrofa OX=9823 GN=ACTB PE=3 SV=2	tr|A0A287AAR4|A0A287AAR4_PIG	3154		-0.4	HQGVMVGMGQKDSYVGDEAQSK	RT: 49.16
PEF-R3-1_SW_RC1_01_8030	Actin beta OS=Sus scrofa OX=9823 GN=ACTB PE=3 SV=2	tr|A0A287AAR4|A0A287AAR4_PIG	113620		4.9	HQGVMVGMGQKDSYVGDEAQSK	RT: 49.16
PEF-R3-1_SW_RC1_01_8030	Actin beta OS=Sus scrofa OX=9823 GN=ACTB PE=3 SV=2	tr|A0A287AAR4|A0A287AAR4_PIG	66804		1.3	KDLYANTVLSGGTTMYPGIADR	RT: 94.34
PEF-R3-1_SW_RC1_01_8030	Actin beta OS=Sus scrofa OX=9823 GN=ACTB PE=3 SV=2	tr|A0A287AAR4|A0A287AAR4_PIG	87742		6.7	KDLYANTVLSGGTTMYPGIADR	RT: 84.68
PEF-R3-1_SW_RC1_01_8030	Actin beta OS=Sus scrofa OX=9823 GN=ACTB PE=3 SV=2	tr|A0A287AAR4|A0A287AAR4_PIG	26790		2.4	LCYVALDFEQEMATAASSSSLEK	RT: 136.75
PEF-R3-1_SW_RC1_01_8030	Actin beta OS=Sus scrofa OX=9823 GN=ACTB PE=3 SV=2	tr|A0A287AAR4|A0A287AAR4_PIG	11704		-2	LCYVALDFEQEMATAASSSSLEKSYELPDGQVITIGNER	RT: 154.68
PEF-R3-1_SW_RC1_01_8030	Actin beta OS=Sus scrofa OX=9823 GN=ACTB PE=3 SV=2	tr|A0A287AAR4|A0A287AAR4_PIG	34162		-2.4	LDLAGRDLTDYLMK	RT: 103.74
PEF-R3-1_SW_RC1_01_8030	Actin beta OS=Sus scrofa OX=9823 GN=ACTB PE=3 SV=2	tr|A0A287AAR4|A0A287AAR4_PIG	48811		-2.3	LDLAGRDLTDYLMK	RT: 17.84
PEF-R3-1_SW_RC1_01_8030	Actin beta OS=Sus scrofa OX=9823 GN=ACTB PE=3 SV=2	tr|A0A287AAR4|A0A287AAR4_PIG	13376		0.8	MDDDIAALVVDNGSGMCK	RT: 24.59
PEF-R3-1_SW_RC1_01_8030	Actin beta OS=Sus scrofa OX=9823 GN=ACTB PE=3 SV=2	tr|A0A287AAR4|A0A287AAR4_PIG	30153		3.3	MDDDIAALVVDNGSGMCKAGFAGDDAPR	RT: 106.52
PEF-R3-1_SW_RC1_01_8030	Actin beta OS=Sus scrofa OX=9823 GN=ACTB PE=3 SV=2	tr|A0A287AAR4|A0A287AAR4_PIG	2888		2.8	MDDDIAALVVDNGSGMCKAGFAGDDAPR	RT: 93.93
PEF-R3-1_SW_RC1_01_8030	Actin beta OS=Sus scrofa OX=9823 GN=ACTB PE=3 SV=2	tr|A0A287AAR4|A0A287AAR4_PIG	68324		-7.1	MDDDIAALVVDNGSGMCKAGFAGDDAPR	RT: 93.93
PEF-R3-1_SW_RC1_01_8030	Actin beta OS=Sus scrofa OX=9823 GN=ACTB PE=3 SV=2	tr|A0A287AAR4|A0A287AAR4_PIG	29944		-1.9	MDDDIAALVVDNGSGMCKAGFAGDDAPR	RT: 98.66
PEF-R3-1_SW_RC1_01_8030	Actin beta OS=Sus scrofa OX=9823 GN=ACTB PE=3 SV=2	tr|A0A287AAR4|A0A287AAR4_PIG	45942		-1.3	MQKEITALAPSTMK	RT: 65
PEF-R3-1_SW_RC1_01_8030	Actin beta OS=Sus scrofa OX=9823 GN=ACTB PE=3 SV=2	tr|A0A287AAR4|A0A287AAR4_PIG	24529		-0.1	MQKEITALAPSTMK	RT: 65
PEF-R3-1_SW_RC1_01_8030	Actin beta OS=Sus scrofa OX=9823 GN=ACTB PE=3 SV=2	tr|A0A287AAR4|A0A287AAR4_PIG	118997		0.5	MQKEITALAPSTMK	RT: 59.44
PEF-R3-1_SW_RC1_01_8030	Actin beta OS=Sus scrofa OX=9823 GN=ACTB PE=3 SV=2	tr|A0A287AAR4|A0A287AAR4_PIG	25764		6.1	MQKEITALAPSTMK	RT: 59.44
PEF-R3-1_SW_RC1_01_8030	Actin beta OS=Sus scrofa OX=9823 GN=ACTB PE=3 SV=2	tr|A0A287AAR4|A0A287AAR4_PIG	201628		-6.1	MQKEITALAPSTMK	RT: 56.88
PEF-R3-1_SW_RC1_01_8030	Actin beta OS=Sus scrofa OX=9823 GN=ACTB PE=3 SV=2	tr|A0A287AAR4|A0A287AAR4_PIG	212173		-5.3	MQKEITALAPSTMK	RT: 56.88
PEF-R3-1_SW_RC1_01_8030	Actin beta OS=Sus scrofa OX=9823 GN=ACTB PE=3 SV=2	tr|A0A287AAR4|A0A287AAR4_PIG	75392		-0.5	MQKEITALAPSTMK	RT: 57.63
PEF-R3-1_SW_RC1_01_8030	Actin beta OS=Sus scrofa OX=9823 GN=ACTB PE=3 SV=2	tr|A0A287AAR4|A0A287AAR4_PIG	25859		3.2	MQKEITALAPSTMK	RT: 57.63
PEF-R3-1_SW_RC1_01_8030	Actin beta OS=Sus scrofa OX=9823 GN=ACTB PE=3 SV=2	tr|A0A287AAR4|A0A287AAR4_PIG	13528		-0.8	MTQIMFETFNTPAMYVAIQAVLSLYASGR	RT: 200.1
PEF-R3-1_SW_RC1_01_8030	Actin beta OS=Sus scrofa OX=9823 GN=ACTB PE=3 SV=2	tr|A0A287AAR4|A0A287AAR4_PIG	12692		-2.2	RGILTLK	RT: 38.72
PEF-R3-1_SW_RC1_01_8030	Actin beta OS=Sus scrofa OX=9823 GN=ACTB PE=3 SV=2	tr|A0A287AAR4|A0A287AAR4_PIG	45828		-4.5	SYELPDGQVITIGNER	RT: 57.5
PEF-R3-1_SW_RC1_01_8030	Actin beta OS=Sus scrofa OX=9823 GN=ACTB PE=3 SV=2	tr|A0A287AAR4|A0A287AAR4_PIG	118560		-1.4	SYELPDGQVITIGNER	RT: 57.5
PEF-R3-1_SW_RC1_01_8030	Actin beta OS=Sus scrofa OX=9823 GN=ACTB PE=3 SV=2	tr|A0A287AAR4|A0A287AAR4_PIG	25859		-3	SYELPDGQVITIGNERFR	RT: 95.05
PEF-R3-1_SW_RC1_01_8030	Actin beta OS=Sus scrofa OX=9823 GN=ACTB PE=3 SV=2	tr|A0A287AAR4|A0A287AAR4_PIG	1045		-1.2	TTGIVMDSGDGVTHTVPIYEGYALPHAILR	RT: 116.68
PEF-R3-1_SW_RC1_01_8030	Actin beta OS=Sus scrofa OX=9823 GN=ACTB PE=3 SV=2	tr|A0A287AAR4|A0A287AAR4_PIG	36024		0.6	TTGIVMDSGDGVTHTVPIYEGYALPHAILR	RT: 116.68
PEF-R3-1_SW_RC1_01_8030	Actin beta OS=Sus scrofa OX=9823 GN=ACTB PE=3 SV=2	tr|A0A287AAR4|A0A287AAR4_PIG	158099		-5.4	TTGIVMDSGDGVTHTVPIYEGYALPHAILR	RT: 68.82
PEF-R3-1_SW_RC1_01_8030	Actin beta OS=Sus scrofa OX=9823 GN=ACTB PE=3 SV=2	tr|A0A287AAR4|A0A287AAR4_PIG	20767		-0.4	VAPEEHPVLLTEAPLNPK	RT: 84.35
PEF-R3-1_SW_RC1_01_8030	Actin beta OS=Sus scrofa OX=9823 GN=ACTB PE=3 SV=2	tr|A0A287AAR4|A0A287AAR4_PIG	43890		-4.5	VAPEEHPVLLTEAPLNPK	RT: 84.35
PEF-R3-1_SW_RC1_01_8030	Actin beta OS=Sus scrofa OX=9823 GN=ACTB PE=3 SV=2	tr|A0A287AAR4|A0A287AAR4_PIG	70281		5.3	VAPEEHPVLLTEAPLNPKANR	RT: 78.57
PEF-R3-1_SW_RC1_01_8030	Actin beta OS=Sus scrofa OX=9823 GN=ACTB PE=3 SV=2	tr|A0A287AAR4|A0A287AAR4_PIG	7220		-5.5	VAPEEHPVLLTEAPLNPKANR	RT: 78.57
PEF-R3-1_SW_RC1_01_8030	Actin beta OS=Sus scrofa OX=9823 GN=ACTB PE=3 SV=2	tr|A0A287AAR4|A0A287AAR4_PIG	61123		-2.7	YPIEHGIVTNWDDMEK	RT: 70.29

## Sheet: A0A287AE06
Replicate	Protein Description	Protein Name	Total Area		Average Mass Error PPM	Peptide Sequence	Peptide Result
iNS15-R1-1_SW_RB1_01_8014	Lamin A/C OS=Sus scrofa OX=9823 GN=LMNA PE=1 SV=1	tr|A0A287AE06|A0A287AE06_PIG	630230		-7	METPSQR	RT: 17.77
iNS15-R1-1_SW_RB1_01_8014	Lamin A/C OS=Sus scrofa OX=9823 GN=LMNA PE=1 SV=1	tr|A0A287AE06|A0A287AE06_PIG	160797		-5.7	ATRSGAQASSTPLSPTR	RT: 32.39
iNS15-R1-1_SW_RB1_01_8014	Lamin A/C OS=Sus scrofa OX=9823 GN=LMNA PE=1 SV=1	tr|A0A287AE06|A0A287AE06_PIG	332386		0.8	SGAQASSTPLSPTR	RT: 52.77
iNS15-R1-1_SW_RB1_01_8014	Lamin A/C OS=Sus scrofa OX=9823 GN=LMNA PE=1 SV=1	tr|A0A287AE06|A0A287AE06_PIG	330771		-7.7	SGAQASSTPLSPTR	RT: 52.77
iNS15-R1-1_SW_RB1_01_8014	Lamin A/C OS=Sus scrofa OX=9823 GN=LMNA PE=1 SV=1	tr|A0A287AE06|A0A287AE06_PIG	135090		-2.5	SGAQASSTPLSPTRITR	RT: 51.93
iNS15-R1-1_SW_RB1_01_8014	Lamin A/C OS=Sus scrofa OX=9823 GN=LMNA PE=1 SV=1	tr|A0A287AE06|A0A287AE06_PIG	1027862		-5.2	LQEKEDLQELNDR	RT: 49.77
iNS15-R1-1_SW_RB1_01_8014	Lamin A/C OS=Sus scrofa OX=9823 GN=LMNA PE=1 SV=1	tr|A0A287AE06|A0A287AE06_PIG	2038681		-6.3	LAVYIDR	RT: 65.14
iNS15-R1-1_SW_RB1_01_8014	Lamin A/C OS=Sus scrofa OX=9823 GN=LMNA PE=1 SV=1	tr|A0A287AE06|A0A287AE06_PIG	1919114		-4.6	SLETENAGLR	RT: 59.72
iNS15-R1-1_SW_RB1_01_8014	Lamin A/C OS=Sus scrofa OX=9823 GN=LMNA PE=1 SV=1	tr|A0A287AE06|A0A287AE06_PIG	2551016		-7.4	SLETENAGLRLR	RT: 68.96
iNS15-R1-1_SW_RB1_01_8014	Lamin A/C OS=Sus scrofa OX=9823 GN=LMNA PE=1 SV=1	tr|A0A287AE06|A0A287AE06_PIG	2400707		-8.2	SLETENAGLRLR	RT: 68.96
iNS15-R1-1_SW_RB1_01_8014	Lamin A/C OS=Sus scrofa OX=9823 GN=LMNA PE=1 SV=1	tr|A0A287AE06|A0A287AE06_PIG	42028		2.8	ITESEEVVSR	RT: 34.4
iNS15-R1-1_SW_RB1_01_8014	Lamin A/C OS=Sus scrofa OX=9823 GN=LMNA PE=1 SV=1	tr|A0A287AE06|A0A287AE06_PIG	153919		-1.9	EVSGIKSAYEAELGDAR	RT: 56.17
iNS15-R1-1_SW_RB1_01_8014	Lamin A/C OS=Sus scrofa OX=9823 GN=LMNA PE=1 SV=1	tr|A0A287AE06|A0A287AE06_PIG	128915		-0.3	EVSGIKSAYEAELGDAR	RT: 56.17
iNS15-R1-1_SW_RB1_01_8014	Lamin A/C OS=Sus scrofa OX=9823 GN=LMNA PE=1 SV=1	tr|A0A287AE06|A0A287AE06_PIG	139099		0.4	EVSGIKSAYEAELGDAR	RT: 56.17
iNS15-R1-1_SW_RB1_01_8014	Lamin A/C OS=Sus scrofa OX=9823 GN=LMNA PE=1 SV=1	tr|A0A287AE06|A0A287AE06_PIG	2996243		-7	SAYEAELGDAR	RT: 64.31
iNS15-R1-1_SW_RB1_01_8014	Lamin A/C OS=Sus scrofa OX=9823 GN=LMNA PE=1 SV=1	tr|A0A287AE06|A0A287AE06_PIG	11609		0.4	SAYEAELGDARK	RT: 60.43
iNS15-R1-1_SW_RB1_01_8014	Lamin A/C OS=Sus scrofa OX=9823 GN=LMNA PE=1 SV=1	tr|A0A287AE06|A0A287AE06_PIG	3838		0.1	KTLDSVAK	RT: 27.31
iNS15-R1-1_SW_RB1_01_8014	Lamin A/C OS=Sus scrofa OX=9823 GN=LMNA PE=1 SV=1	tr|A0A287AE06|A0A287AE06_PIG	242782		-4.4	TLDSVAKER	RT: 33.78
iNS15-R1-1_SW_RB1_01_8014	Lamin A/C OS=Sus scrofa OX=9823 GN=LMNA PE=1 SV=1	tr|A0A287AE06|A0A287AE06_PIG	2054109		-6	KEGDLMAAQAR	RT: 60.91
iNS15-R1-1_SW_RB1_01_8014	Lamin A/C OS=Sus scrofa OX=9823 GN=LMNA PE=1 SV=1	tr|A0A287AE06|A0A287AE06_PIG	1420459		-8.5	KEGDLMAAQAR	RT: 59.79
iNS15-R1-1_SW_RB1_01_8014	Lamin A/C OS=Sus scrofa OX=9823 GN=LMNA PE=1 SV=1	tr|A0A287AE06|A0A287AE06_PIG	1299087		-7.4	KEGDLMAAQAR	RT: 59.79
iNS15-R1-1_SW_RB1_01_8014	Lamin A/C OS=Sus scrofa OX=9823 GN=LMNA PE=1 SV=1	tr|A0A287AE06|A0A287AE06_PIG	2256421		-8.4	EGDLMAAQAR	RT: 65.91
iNS15-R1-1_SW_RB1_01_8014	Lamin A/C OS=Sus scrofa OX=9823 GN=LMNA PE=1 SV=1	tr|A0A287AE06|A0A287AE06_PIG	16017		5.3	EGDLMAAQARLK	RT: 68.7
iNS15-R1-1_SW_RB1_01_8014	Lamin A/C OS=Sus scrofa OX=9823 GN=LMNA PE=1 SV=1	tr|A0A287AE06|A0A287AE06_PIG	180576		-7	EGDLMAAQARLK	RT: 68.7
iNS15-R1-1_SW_RB1_01_8014	Lamin A/C OS=Sus scrofa OX=9823 GN=LMNA PE=1 SV=1	tr|A0A287AE06|A0A287AE06_PIG	703019		-5.1	LKDLEALLNSK	RT: 68.41
iNS15-R1-1_SW_RB1_01_8014	Lamin A/C OS=Sus scrofa OX=9823 GN=LMNA PE=1 SV=1	tr|A0A287AE06|A0A287AE06_PIG	354654		-3.3	DLEALLNSKEAALSTALSEK	RT: 86.35
iNS15-R1-1_SW_RB1_01_8014	Lamin A/C OS=Sus scrofa OX=9823 GN=LMNA PE=1 SV=1	tr|A0A287AE06|A0A287AE06_PIG	371241		0	EAALSTALSEK	RT: 56.87
iNS15-R1-1_SW_RB1_01_8014	Lamin A/C OS=Sus scrofa OX=9823 GN=LMNA PE=1 SV=1	tr|A0A287AE06|A0A287AE06_PIG	694070		-5.1	RTLEGELHDLR	RT: 73.83
iNS15-R1-1_SW_RB1_01_8014	Lamin A/C OS=Sus scrofa OX=9823 GN=LMNA PE=1 SV=1	tr|A0A287AE06|A0A287AE06_PIG	87685		4.1	GQVAKLEAALGEAK	RT: 185.84
iNS15-R1-1_SW_RB1_01_8014	Lamin A/C OS=Sus scrofa OX=9823 GN=LMNA PE=1 SV=1	tr|A0A287AE06|A0A287AE06_PIG	265601		-5	LEAALGEAK	RT: 64.38
iNS15-R1-1_SW_RB1_01_8014	Lamin A/C OS=Sus scrofa OX=9823 GN=LMNA PE=1 SV=1	tr|A0A287AE06|A0A287AE06_PIG	25061		2.5	LEAALGEAKK	RT: 44.91
iNS15-R1-1_SW_RB1_01_8014	Lamin A/C OS=Sus scrofa OX=9823 GN=LMNA PE=1 SV=1	tr|A0A287AE06|A0A287AE06_PIG	97204		-4.2	QLQDEMLRR	RT: 32.04
iNS15-R1-1_SW_RB1_01_8014	Lamin A/C OS=Sus scrofa OX=9823 GN=LMNA PE=1 SV=1	tr|A0A287AE06|A0A287AE06_PIG	349391		-4.3	RVDAENR	RT: 39.13
iNS15-R1-1_SW_RB1_01_8014	Lamin A/C OS=Sus scrofa OX=9823 GN=LMNA PE=1 SV=1	tr|A0A287AE06|A0A287AE06_PIG	853822		-7.4	NIYSEELR	RT: 54.16
iNS15-R1-1_SW_RB1_01_8014	Lamin A/C OS=Sus scrofa OX=9823 GN=LMNA PE=1 SV=1	tr|A0A287AE06|A0A287AE06_PIG	2229441		-8	LADALQELR	RT: 68.96
iNS15-R1-1_SW_RB1_01_8014	Lamin A/C OS=Sus scrofa OX=9823 GN=LMNA PE=1 SV=1	tr|A0A287AE06|A0A287AE06_PIG	191026		-0.3	ELEKTYSAK	RT: 104.98
iNS15-R1-1_SW_RB1_01_8014	Lamin A/C OS=Sus scrofa OX=9823 GN=LMNA PE=1 SV=1	tr|A0A287AE06|A0A287AE06_PIG	552843		0.8	TYSAKLDNAR	RT: 40.39
iNS15-R1-1_SW_RB1_01_8014	Lamin A/C OS=Sus scrofa OX=9823 GN=LMNA PE=1 SV=1	tr|A0A287AE06|A0A287AE06_PIG	44479		-9.3	QSAERNSNLVGAAHEELQQSR	RT: 57.7
iNS15-R1-1_SW_RB1_01_8014	Lamin A/C OS=Sus scrofa OX=9823 GN=LMNA PE=1 SV=1	tr|A0A287AE06|A0A287AE06_PIG	399285		-2.9	NSNLVGAAHEELQQSR	RT: 65.07
iNS15-R1-1_SW_RB1_01_8014	Lamin A/C OS=Sus scrofa OX=9823 GN=LMNA PE=1 SV=1	tr|A0A287AE06|A0A287AE06_PIG	332500		-2.2	NSNLVGAAHEELQQSR	RT: 65.07
iNS15-R1-1_SW_RB1_01_8014	Lamin A/C OS=Sus scrofa OX=9823 GN=LMNA PE=1 SV=1	tr|A0A287AE06|A0A287AE06_PIG	79059		-0.3	IRIDSLSAQLSQLQK	RT: 88.15
iNS15-R1-1_SW_RB1_01_8014	Lamin A/C OS=Sus scrofa OX=9823 GN=LMNA PE=1 SV=1	tr|A0A287AE06|A0A287AE06_PIG	418874		-1.2	IDSLSAQLSQLQK	RT: 67.37
iNS15-R1-1_SW_RB1_01_8014	Lamin A/C OS=Sus scrofa OX=9823 GN=LMNA PE=1 SV=1	tr|A0A287AE06|A0A287AE06_PIG	107331		-1.2	QLAAKEAK	RT: 40.25
iNS15-R1-1_SW_RB1_01_8014	Lamin A/C OS=Sus scrofa OX=9823 GN=LMNA PE=1 SV=1	tr|A0A287AE06|A0A287AE06_PIG	722665		-7.2	DLEDSLAR	RT: 48.38
iNS15-R1-1_SW_RB1_01_8014	Lamin A/C OS=Sus scrofa OX=9823 GN=LMNA PE=1 SV=1	tr|A0A287AE06|A0A287AE06_PIG	1917309		-7	DLEDSLARER	RT: 65.07
iNS15-R1-1_SW_RB1_01_8014	Lamin A/C OS=Sus scrofa OX=9823 GN=LMNA PE=1 SV=1	tr|A0A287AE06|A0A287AE06_PIG	2002980		-6.8	DLEDSLARER	RT: 65.07
iNS15-R1-1_SW_RB1_01_8014	Lamin A/C OS=Sus scrofa OX=9823 GN=LMNA PE=1 SV=1	tr|A0A287AE06|A0A287AE06_PIG	51243		-3.2	LLADKER	RT: 28.78
iNS15-R1-1_SW_RB1_01_8014	Lamin A/C OS=Sus scrofa OX=9823 GN=LMNA PE=1 SV=1	tr|A0A287AE06|A0A287AE06_PIG	2100507		-6.1	EREMAEMR	RT: 60.91
iNS15-R1-1_SW_RB1_01_8014	Lamin A/C OS=Sus scrofa OX=9823 GN=LMNA PE=1 SV=1	tr|A0A287AE06|A0A287AE06_PIG	49780		-0.8	MQQQLDEYQELLDIK	RT: 116.73
iNS15-R1-1_SW_RB1_01_8014	Lamin A/C OS=Sus scrofa OX=9823 GN=LMNA PE=1 SV=1	tr|A0A287AE06|A0A287AE06_PIG	29925		-1.4	LALDMEIHAYR	RT: 26.06
iNS15-R1-1_SW_RB1_01_8014	Lamin A/C OS=Sus scrofa OX=9823 GN=LMNA PE=1 SV=1	tr|A0A287AE06|A0A287AE06_PIG	2117493		-6.3	LLEGEEER	RT: 65.07
iNS15-R1-1_SW_RB1_01_8014	Lamin A/C OS=Sus scrofa OX=9823 GN=LMNA PE=1 SV=1	tr|A0A287AE06|A0A287AE06_PIG	3274422		-9.3	LLEGEEERLR	RT: 64.44
iNS15-R1-1_SW_RB1_01_8014	Lamin A/C OS=Sus scrofa OX=9823 GN=LMNA PE=1 SV=1	tr|A0A287AE06|A0A287AE06_PIG	3280749		-9.2	LLEGEEERLR	RT: 64.44
iNS15-R1-1_SW_RB1_01_8014	Lamin A/C OS=Sus scrofa OX=9823 GN=LMNA PE=1 SV=1	tr|A0A287AE06|A0A287AE06_PIG	242649		-6.1	LRLSPSPTSQR	RT: 31.49
iNS15-R1-1_SW_RB1_01_8014	Lamin A/C OS=Sus scrofa OX=9823 GN=LMNA PE=1 SV=1	tr|A0A287AE06|A0A287AE06_PIG	2197882		-8.4	LSPSPTSQR	RT: 67.92
iNS15-R1-1_SW_RB1_01_8014	Lamin A/C OS=Sus scrofa OX=9823 GN=LMNA PE=1 SV=1	tr|A0A287AE06|A0A287AE06_PIG	2679589		-7.6	LSPSPTSQRSR	RT: 64.31
iNS15-R1-1_SW_RB1_01_8014	Lamin A/C OS=Sus scrofa OX=9823 GN=LMNA PE=1 SV=1	tr|A0A287AE06|A0A287AE06_PIG	48469		3.3	GRASSHSSQTQSGGSVTK	RT: 75.36
iNS15-R1-1_SW_RB1_01_8014	Lamin A/C OS=Sus scrofa OX=9823 GN=LMNA PE=1 SV=1	tr|A0A287AE06|A0A287AE06_PIG	18411		2.5	ASSHSSQTQSGGSVTKK	RT: 73.99
iNS15-R1-1_SW_RB1_01_8014	Lamin A/C OS=Sus scrofa OX=9823 GN=LMNA PE=1 SV=1	tr|A0A287AE06|A0A287AE06_PIG	624340		-6.2	KLESSESR	RT: 17.77
iNS15-R1-1_SW_RB1_01_8014	Lamin A/C OS=Sus scrofa OX=9823 GN=LMNA PE=1 SV=1	tr|A0A287AE06|A0A287AE06_PIG	785232		-4.7	LESSESR	RT: 49.63
iNS15-R1-1_SW_RB1_01_8014	Lamin A/C OS=Sus scrofa OX=9823 GN=LMNA PE=1 SV=1	tr|A0A287AE06|A0A287AE06_PIG	1990155		-6.2	SSFSQHAR	RT: 65.28
iNS15-R1-1_SW_RB1_01_8014	Lamin A/C OS=Sus scrofa OX=9823 GN=LMNA PE=1 SV=1	tr|A0A287AE06|A0A287AE06_PIG	3179175		-6.7	VAVEEVDEEGKFVR	RT: 64.86
iNS15-R1-1_SW_RB1_01_8014	Lamin A/C OS=Sus scrofa OX=9823 GN=LMNA PE=1 SV=1	tr|A0A287AE06|A0A287AE06_PIG	3061546		-6.9	VAVEEVDEEGKFVR	RT: 64.86
iNS15-R1-1_SW_RB1_01_8014	Lamin A/C OS=Sus scrofa OX=9823 GN=LMNA PE=1 SV=1	tr|A0A287AE06|A0A287AE06_PIG	115976		4.3	NKSNEDQSMGNWQIK	RT: 94.76
iNS15-R1-1_SW_RB1_01_8014	Lamin A/C OS=Sus scrofa OX=9823 GN=LMNA PE=1 SV=1	tr|A0A287AE06|A0A287AE06_PIG	1678289		-7.3	SNEDQSMGNWQIKR	RT: 65.28
iNS15-R1-1_SW_RB1_01_8014	Lamin A/C OS=Sus scrofa OX=9823 GN=LMNA PE=1 SV=1	tr|A0A287AE06|A0A287AE06_PIG	1934466		-6.8	SNEDQSMGNWQIKR	RT: 65.28
iNS15-R1-1_SW_RB1_01_8014	Lamin A/C OS=Sus scrofa OX=9823 GN=LMNA PE=1 SV=1	tr|A0A287AE06|A0A287AE06_PIG	4883		2.8	FPPKFTLK	RT: 24.04
iNS15-R1-1_SW_RB1_01_8014	Lamin A/C OS=Sus scrofa OX=9823 GN=LMNA PE=1 SV=1	tr|A0A287AE06|A0A287AE06_PIG	913197		-4.6	SQNTWGCGNSLR	RT: 48.24
iNS15-R1-1_SW_RB1_01_8014	Lamin A/C OS=Sus scrofa OX=9823 GN=LMNA PE=1 SV=1	tr|A0A287AE06|A0A287AE06_PIG	126749		2	TALINSTGEEVAMR	RT: 73.35
iNS15-R1-1_SW_RB1_01_8014	Lamin A/C OS=Sus scrofa OX=9823 GN=LMNA PE=1 SV=1	tr|A0A287AE06|A0A287AE06_PIG	1126662		-5.7	TALINSTGEEVAMR	RT: 50.05
iNS15-R1-1_SW_RB1_01_8014	Lamin A/C OS=Sus scrofa OX=9823 GN=LMNA PE=1 SV=1	tr|A0A287AE06|A0A287AE06_PIG	136971		1.5	TVLCGTCGQPADK	RT: 42.61
iNS15-R1-1_SW_RB1_01_8014	Lamin A/C OS=Sus scrofa OX=9823 GN=LMNA PE=1 SV=1	tr|A0A287AE06|A0A287AE06_PIG	579177		-7.8	TVLCGTCGQPADKASASSSGAQVGGSISSGSSASSVTVTR	RT: 69.38
iNS15-R1-1_SW_RB1_01_8014	Lamin A/C OS=Sus scrofa OX=9823 GN=LMNA PE=1 SV=1	tr|A0A287AE06|A0A287AE06_PIG	167960		-0.5	ASASSSGAQVGGSISSGSSASSVTVTR	RT: 67.03
iNS15-R1-1_SW_RB1_01_8014	Lamin A/C OS=Sus scrofa OX=9823 GN=LMNA PE=1 SV=1	tr|A0A287AE06|A0A287AE06_PIG	3030158		-8.2	SYRSVGGSGGGSFGDNLVTR	RT: 64.51
iNS15-R1-1_SW_RB1_01_8014	Lamin A/C OS=Sus scrofa OX=9823 GN=LMNA PE=1 SV=1	tr|A0A287AE06|A0A287AE06_PIG	3021988		-8.2	SYRSVGGSGGGSFGDNLVTR	RT: 64.51
iNS15-R1-1_SW_RB1_01_8014	Lamin A/C OS=Sus scrofa OX=9823 GN=LMNA PE=1 SV=1	tr|A0A287AE06|A0A287AE06_PIG	558144		-3.2	SVGGSGGGSFGDNLVTR	RT: 65.21
iNS15-R1-1_SW_RB1_01_8014	Lamin A/C OS=Sus scrofa OX=9823 GN=LMNA PE=1 SV=1	tr|A0A287AE06|A0A287AE06_PIG	1985272		-4.3	SVGGSGGGSFGDNLVTR	RT: 65.21
iNS15-R1-1_SW_RB1_01_8014	Lamin A/C OS=Sus scrofa OX=9823 GN=LMNA PE=1 SV=1	tr|A0A287AE06|A0A287AE06_PIG	3542113		-9.3	SVGGSGGGSFGDNLVTRSYLLGNSRPR	RT: 64.44
iNS15-R1-1_SW_RB1_01_8014	Lamin A/C OS=Sus scrofa OX=9823 GN=LMNA PE=1 SV=1	tr|A0A287AE06|A0A287AE06_PIG	641269		-2	SYLLGNSRPR	RT: 49.28
iNS15-R1-1_SW_RB1_01_8014	Lamin A/C OS=Sus scrofa OX=9823 GN=LMNA PE=1 SV=1	tr|A0A287AE06|A0A287AE06_PIG	45334		2.7	TQSPQNCSIM	RT: 51.72
iNS15-R2-1_SW_RB6_01_8020	Lamin A/C OS=Sus scrofa OX=9823 GN=LMNA PE=1 SV=1	tr|A0A287AE06|A0A287AE06_PIG	45163		-2.3	METPSQR	RT: 32.41
iNS15-R2-1_SW_RB6_01_8020	Lamin A/C OS=Sus scrofa OX=9823 GN=LMNA PE=1 SV=1	tr|A0A287AE06|A0A287AE06_PIG	20767		-0.7	ATRSGAQASSTPLSPTR	RT: 32.41
iNS15-R2-1_SW_RB6_01_8020	Lamin A/C OS=Sus scrofa OX=9823 GN=LMNA PE=1 SV=1	tr|A0A287AE06|A0A287AE06_PIG	6137		-3.4	SGAQASSTPLSPTR	RT: 37.07
iNS15-R2-1_SW_RB6_01_8020	Lamin A/C OS=Sus scrofa OX=9823 GN=LMNA PE=1 SV=1	tr|A0A287AE06|A0A287AE06_PIG	156484		-4.5	SGAQASSTPLSPTR	RT: 37.07
iNS15-R2-1_SW_RB6_01_8020	Lamin A/C OS=Sus scrofa OX=9823 GN=LMNA PE=1 SV=1	tr|A0A287AE06|A0A287AE06_PIG	5567		8.6	SGAQASSTPLSPTRITR	RT: 51.19
iNS15-R2-1_SW_RB6_01_8020	Lamin A/C OS=Sus scrofa OX=9823 GN=LMNA PE=1 SV=1	tr|A0A287AE06|A0A287AE06_PIG	18012		3.9	LQEKEDLQELNDR	RT: 53.71
iNS15-R2-1_SW_RB6_01_8020	Lamin A/C OS=Sus scrofa OX=9823 GN=LMNA PE=1 SV=1	tr|A0A287AE06|A0A287AE06_PIG	21299		-1.6	LAVYIDR	RT: 59.83
iNS15-R2-1_SW_RB6_01_8020	Lamin A/C OS=Sus scrofa OX=9823 GN=LMNA PE=1 SV=1	tr|A0A287AE06|A0A287AE06_PIG	47253		-6.5	SLETENAGLR	RT: 38.6
iNS15-R2-1_SW_RB6_01_8020	Lamin A/C OS=Sus scrofa OX=9823 GN=LMNA PE=1 SV=1	tr|A0A287AE06|A0A287AE06_PIG	36822		-2.9	SLETENAGLRLR	RT: 56.9
iNS15-R2-1_SW_RB6_01_8020	Lamin A/C OS=Sus scrofa OX=9823 GN=LMNA PE=1 SV=1	tr|A0A287AE06|A0A287AE06_PIG	25707		-7	SLETENAGLRLR	RT: 56.9
iNS15-R2-1_SW_RB6_01_8020	Lamin A/C OS=Sus scrofa OX=9823 GN=LMNA PE=1 SV=1	tr|A0A287AE06|A0A287AE06_PIG	7790		-2.3	ITESEEVVSR	RT: 38.4
iNS15-R2-1_SW_RB6_01_8020	Lamin A/C OS=Sus scrofa OX=9823 GN=LMNA PE=1 SV=1	tr|A0A287AE06|A0A287AE06_PIG	836		-3	EVSGIKSAYEAELGDAR	RT: 32.75
iNS15-R2-1_SW_RB6_01_8020	Lamin A/C OS=Sus scrofa OX=9823 GN=LMNA PE=1 SV=1	tr|A0A287AE06|A0A287AE06_PIG	14801		-7.5	EVSGIKSAYEAELGDAR	RT: 32.75
iNS15-R2-1_SW_RB6_01_8020	Lamin A/C OS=Sus scrofa OX=9823 GN=LMNA PE=1 SV=1	tr|A0A287AE06|A0A287AE06_PIG	13566		-8.4	EVSGIKSAYEAELGDAR	RT: 32.75
iNS15-R2-1_SW_RB6_01_8020	Lamin A/C OS=Sus scrofa OX=9823 GN=LMNA PE=1 SV=1	tr|A0A287AE06|A0A287AE06_PIG	146604		-8.8	SAYEAELGDAR	RT: 64.28
iNS15-R2-1_SW_RB6_01_8020	Lamin A/C OS=Sus scrofa OX=9823 GN=LMNA PE=1 SV=1	tr|A0A287AE06|A0A287AE06_PIG	1786		-3.3	SAYEAELGDARK	RT: 56.98
iNS15-R2-1_SW_RB6_01_8020	Lamin A/C OS=Sus scrofa OX=9823 GN=LMNA PE=1 SV=1	tr|A0A287AE06|A0A287AE06_PIG	1824		4.7	KTLDSVAK	RT: 27.26
iNS15-R2-1_SW_RB6_01_8020	Lamin A/C OS=Sus scrofa OX=9823 GN=LMNA PE=1 SV=1	tr|A0A287AE06|A0A287AE06_PIG	33725		-4.7	TLDSVAKER	RT: 36.45
iNS15-R2-1_SW_RB6_01_8020	Lamin A/C OS=Sus scrofa OX=9823 GN=LMNA PE=1 SV=1	tr|A0A287AE06|A0A287AE06_PIG	175161		-3.9	KEGDLMAAQAR	RT: 37.06
iNS15-R2-1_SW_RB6_01_8020	Lamin A/C OS=Sus scrofa OX=9823 GN=LMNA PE=1 SV=1	tr|A0A287AE06|A0A287AE06_PIG	29602		-4.3	KEGDLMAAQAR	RT: 56.9
iNS15-R2-1_SW_RB6_01_8020	Lamin A/C OS=Sus scrofa OX=9823 GN=LMNA PE=1 SV=1	tr|A0A287AE06|A0A287AE06_PIG	31046		-2	KEGDLMAAQAR	RT: 56.9
iNS15-R2-1_SW_RB6_01_8020	Lamin A/C OS=Sus scrofa OX=9823 GN=LMNA PE=1 SV=1	tr|A0A287AE06|A0A287AE06_PIG	78375		-2.2	EGDLMAAQAR	RT: 52.8
iNS15-R2-1_SW_RB6_01_8020	Lamin A/C OS=Sus scrofa OX=9823 GN=LMNA PE=1 SV=1	tr|A0A287AE06|A0A287AE06_PIG	4047		1.5	EGDLMAAQARLK	RT: 68.04
iNS15-R2-1_SW_RB6_01_8020	Lamin A/C OS=Sus scrofa OX=9823 GN=LMNA PE=1 SV=1	tr|A0A287AE06|A0A287AE06_PIG	2413		2.4	EGDLMAAQARLK	RT: 68.04
iNS15-R2-1_SW_RB6_01_8020	Lamin A/C OS=Sus scrofa OX=9823 GN=LMNA PE=1 SV=1	tr|A0A287AE06|A0A287AE06_PIG	4883		1.3	LKDLEALLNSK	RT: 68.59
iNS15-R2-1_SW_RB6_01_8020	Lamin A/C OS=Sus scrofa OX=9823 GN=LMNA PE=1 SV=1	tr|A0A287AE06|A0A287AE06_PIG	7695		5.5	DLEALLNSKEAALSTALSEK	RT: 85.15
iNS15-R2-1_SW_RB6_01_8020	Lamin A/C OS=Sus scrofa OX=9823 GN=LMNA PE=1 SV=1	tr|A0A287AE06|A0A287AE06_PIG	2584		-0.8	EAALSTALSEK	RT: 57.54
iNS15-R2-1_SW_RB6_01_8020	Lamin A/C OS=Sus scrofa OX=9823 GN=LMNA PE=1 SV=1	tr|A0A287AE06|A0A287AE06_PIG	1368		-4.2	RTLEGELHDLR	RT: 74.23
iNS15-R2-1_SW_RB6_01_8020	Lamin A/C OS=Sus scrofa OX=9823 GN=LMNA PE=1 SV=1	tr|A0A287AE06|A0A287AE06_PIG	2451		-2.9	GQVAKLEAALGEAK	RT: 189
iNS15-R2-1_SW_RB6_01_8020	Lamin A/C OS=Sus scrofa OX=9823 GN=LMNA PE=1 SV=1	tr|A0A287AE06|A0A287AE06_PIG	17328		2.3	LEAALGEAK	RT: 44.3
iNS15-R2-1_SW_RB6_01_8020	Lamin A/C OS=Sus scrofa OX=9823 GN=LMNA PE=1 SV=1	tr|A0A287AE06|A0A287AE06_PIG	12711		-5.3	LEAALGEAKK	RT: 42.98
iNS15-R2-1_SW_RB6_01_8020	Lamin A/C OS=Sus scrofa OX=9823 GN=LMNA PE=1 SV=1	tr|A0A287AE06|A0A287AE06_PIG	84075		-3.4	QLQDEMLRR	RT: 32.13
iNS15-R2-1_SW_RB6_01_8020	Lamin A/C OS=Sus scrofa OX=9823 GN=LMNA PE=1 SV=1	tr|A0A287AE06|A0A287AE06_PIG	29792		-5.6	RVDAENR	RT: 35.05
iNS15-R2-1_SW_RB6_01_8020	Lamin A/C OS=Sus scrofa OX=9823 GN=LMNA PE=1 SV=1	tr|A0A287AE06|A0A287AE06_PIG	41477		-2.3	NIYSEELR	RT: 54.89
iNS15-R2-1_SW_RB6_01_8020	Lamin A/C OS=Sus scrofa OX=9823 GN=LMNA PE=1 SV=1	tr|A0A287AE06|A0A287AE06_PIG	23864		-7.8	LADALQELR	RT: 67.97
iNS15-R2-1_SW_RB6_01_8020	Lamin A/C OS=Sus scrofa OX=9823 GN=LMNA PE=1 SV=1	tr|A0A287AE06|A0A287AE06_PIG	2318		3.6	ELEKTYSAK	RT: 106.78
iNS15-R2-1_SW_RB6_01_8020	Lamin A/C OS=Sus scrofa OX=9823 GN=LMNA PE=1 SV=1	tr|A0A287AE06|A0A287AE06_PIG	197581		-4.4	TYSAKLDNAR	RT: 37.06
iNS15-R2-1_SW_RB6_01_8020	Lamin A/C OS=Sus scrofa OX=9823 GN=LMNA PE=1 SV=1	tr|A0A287AE06|A0A287AE06_PIG	1349		4.6	QSAERNSNLVGAAHEELQQSR	RT: 48.49
iNS15-R2-1_SW_RB6_01_8020	Lamin A/C OS=Sus scrofa OX=9823 GN=LMNA PE=1 SV=1	tr|A0A287AE06|A0A287AE06_PIG	3895		0.5	NSNLVGAAHEELQQSR	RT: 64.29
iNS15-R2-1_SW_RB6_01_8020	Lamin A/C OS=Sus scrofa OX=9823 GN=LMNA PE=1 SV=1	tr|A0A287AE06|A0A287AE06_PIG	3895		0.5	NSNLVGAAHEELQQSR	RT: 64.29
iNS15-R2-1_SW_RB6_01_8020	Lamin A/C OS=Sus scrofa OX=9823 GN=LMNA PE=1 SV=1	tr|A0A287AE06|A0A287AE06_PIG	418		-5.5	IRIDSLSAQLSQLQK	RT: 92.61
iNS15-R2-1_SW_RB6_01_8020	Lamin A/C OS=Sus scrofa OX=9823 GN=LMNA PE=1 SV=1	tr|A0A287AE06|A0A287AE06_PIG	2242		-4.2	IDSLSAQLSQLQK	RT: 67.48
iNS15-R2-1_SW_RB6_01_8020	Lamin A/C OS=Sus scrofa OX=9823 GN=LMNA PE=1 SV=1	tr|A0A287AE06|A0A287AE06_PIG	7619		2.8	QLAAKEAK	RT: 38.39
iNS15-R2-1_SW_RB6_01_8020	Lamin A/C OS=Sus scrofa OX=9823 GN=LMNA PE=1 SV=1	tr|A0A287AE06|A0A287AE06_PIG	193097		-4.4	DLEDSLAR	RT: 37.06
iNS15-R2-1_SW_RB6_01_8020	Lamin A/C OS=Sus scrofa OX=9823 GN=LMNA PE=1 SV=1	tr|A0A287AE06|A0A287AE06_PIG	66215		-6.5	DLEDSLARER	RT: 40.33
iNS15-R2-1_SW_RB6_01_8020	Lamin A/C OS=Sus scrofa OX=9823 GN=LMNA PE=1 SV=1	tr|A0A287AE06|A0A287AE06_PIG	74993		-5.6	DLEDSLARER	RT: 40.33
iNS15-R2-1_SW_RB6_01_8020	Lamin A/C OS=Sus scrofa OX=9823 GN=LMNA PE=1 SV=1	tr|A0A287AE06|A0A287AE06_PIG	28215		3.2	LLADKER	RT: 31.98
iNS15-R2-1_SW_RB6_01_8020	Lamin A/C OS=Sus scrofa OX=9823 GN=LMNA PE=1 SV=1	tr|A0A287AE06|A0A287AE06_PIG	26163		-6.6	EREMAEMR	RT: 56.9
iNS15-R2-1_SW_RB6_01_8020	Lamin A/C OS=Sus scrofa OX=9823 GN=LMNA PE=1 SV=1	tr|A0A287AE06|A0A287AE06_PIG	893		7.5	MQQQLDEYQELLDIK	RT: 116.18
iNS15-R2-1_SW_RB6_01_8020	Lamin A/C OS=Sus scrofa OX=9823 GN=LMNA PE=1 SV=1	tr|A0A287AE06|A0A287AE06_PIG	1387		-3.6	LALDMEIHAYR	RT: 26.64
iNS15-R2-1_SW_RB6_01_8020	Lamin A/C OS=Sus scrofa OX=9823 GN=LMNA PE=1 SV=1	tr|A0A287AE06|A0A287AE06_PIG	46778		-2.9	LLEGEEER	RT: 32.41
iNS15-R2-1_SW_RB6_01_8020	Lamin A/C OS=Sus scrofa OX=9823 GN=LMNA PE=1 SV=1	tr|A0A287AE06|A0A287AE06_PIG	68704		-2.4	LLEGEEERLR	RT: 36.23
iNS15-R2-1_SW_RB6_01_8020	Lamin A/C OS=Sus scrofa OX=9823 GN=LMNA PE=1 SV=1	tr|A0A287AE06|A0A287AE06_PIG	70224		-2.2	LLEGEEERLR	RT: 36.23
iNS15-R2-1_SW_RB6_01_8020	Lamin A/C OS=Sus scrofa OX=9823 GN=LMNA PE=1 SV=1	tr|A0A287AE06|A0A287AE06_PIG	36575		0.1	LRLSPSPTSQR	RT: 34.15
iNS15-R2-1_SW_RB6_01_8020	Lamin A/C OS=Sus scrofa OX=9823 GN=LMNA PE=1 SV=1	tr|A0A287AE06|A0A287AE06_PIG	118674		-4.1	LSPSPTSQR	RT: 37.55
iNS15-R2-1_SW_RB6_01_8020	Lamin A/C OS=Sus scrofa OX=9823 GN=LMNA PE=1 SV=1	tr|A0A287AE06|A0A287AE06_PIG	29013		-2.4	LSPSPTSQRSR	RT: 54.89
iNS15-R2-1_SW_RB6_01_8020	Lamin A/C OS=Sus scrofa OX=9823 GN=LMNA PE=1 SV=1	tr|A0A287AE06|A0A287AE06_PIG	1406		1.6	GRASSHSSQTQSGGSVTK	RT: 76.45
iNS15-R2-1_SW_RB6_01_8020	Lamin A/C OS=Sus scrofa OX=9823 GN=LMNA PE=1 SV=1	tr|A0A287AE06|A0A287AE06_PIG	893		-0.5	ASSHSSQTQSGGSVTKK	RT: 76.66
iNS15-R2-1_SW_RB6_01_8020	Lamin A/C OS=Sus scrofa OX=9823 GN=LMNA PE=1 SV=1	tr|A0A287AE06|A0A287AE06_PIG	3629		-5.5	KLESSESR	RT: 26.92
iNS15-R2-1_SW_RB6_01_8020	Lamin A/C OS=Sus scrofa OX=9823 GN=LMNA PE=1 SV=1	tr|A0A287AE06|A0A287AE06_PIG	27189		-1.3	LESSESR	RT: 47.02
iNS15-R2-1_SW_RB6_01_8020	Lamin A/C OS=Sus scrofa OX=9823 GN=LMNA PE=1 SV=1	tr|A0A287AE06|A0A287AE06_PIG	33136		-3.7	SSFSQHAR	RT: 54.89
iNS15-R2-1_SW_RB6_01_8020	Lamin A/C OS=Sus scrofa OX=9823 GN=LMNA PE=1 SV=1	tr|A0A287AE06|A0A287AE06_PIG	10982		2	VAVEEVDEEGKFVR	RT: 66.37
iNS15-R2-1_SW_RB6_01_8020	Lamin A/C OS=Sus scrofa OX=9823 GN=LMNA PE=1 SV=1	tr|A0A287AE06|A0A287AE06_PIG	9234		2.9	VAVEEVDEEGKFVR	RT: 66.37
iNS15-R2-1_SW_RB6_01_8020	Lamin A/C OS=Sus scrofa OX=9823 GN=LMNA PE=1 SV=1	tr|A0A287AE06|A0A287AE06_PIG	361		3.7	NKSNEDQSMGNWQIK	RT: 94.07
iNS15-R2-1_SW_RB6_01_8020	Lamin A/C OS=Sus scrofa OX=9823 GN=LMNA PE=1 SV=1	tr|A0A287AE06|A0A287AE06_PIG	162336		-8.4	SNEDQSMGNWQIKR	RT: 64.28
iNS15-R2-1_SW_RB6_01_8020	Lamin A/C OS=Sus scrofa OX=9823 GN=LMNA PE=1 SV=1	tr|A0A287AE06|A0A287AE06_PIG	162336		-8.4	SNEDQSMGNWQIKR	RT: 64.28
iNS15-R2-1_SW_RB6_01_8020	Lamin A/C OS=Sus scrofa OX=9823 GN=LMNA PE=1 SV=1	tr|A0A287AE06|A0A287AE06_PIG	1634		7	FPPKFTLK	RT: 26.13
iNS15-R2-1_SW_RB6_01_8020	Lamin A/C OS=Sus scrofa OX=9823 GN=LMNA PE=1 SV=1	tr|A0A287AE06|A0A287AE06_PIG	31293		-4.6	SQNTWGCGNSLR	RT: 44.72
iNS15-R2-1_SW_RB6_01_8020	Lamin A/C OS=Sus scrofa OX=9823 GN=LMNA PE=1 SV=1	tr|A0A287AE06|A0A287AE06_PIG	4579		-6	TALINSTGEEVAMR	RT: 75.34
iNS15-R2-1_SW_RB6_01_8020	Lamin A/C OS=Sus scrofa OX=9823 GN=LMNA PE=1 SV=1	tr|A0A287AE06|A0A287AE06_PIG	67279		-2.2	TALINSTGEEVAMR	RT: 52.79
iNS15-R2-1_SW_RB6_01_8020	Lamin A/C OS=Sus scrofa OX=9823 GN=LMNA PE=1 SV=1	tr|A0A287AE06|A0A287AE06_PIG	15124		-3.5	TVLCGTCGQPADK	RT: 39.09
iNS15-R2-1_SW_RB6_01_8020	Lamin A/C OS=Sus scrofa OX=9823 GN=LMNA PE=1 SV=1	tr|A0A287AE06|A0A287AE06_PIG	41230		-1.7	TVLCGTCGQPADKASASSSGAQVGGSISSGSSASSVTVTR	RT: 66.37
iNS15-R2-1_SW_RB6_01_8020	Lamin A/C OS=Sus scrofa OX=9823 GN=LMNA PE=1 SV=1	tr|A0A287AE06|A0A287AE06_PIG	1026		-4	ASASSSGAQVGGSISSGSSASSVTVTR	RT: 66.37
iNS15-R2-1_SW_RB6_01_8020	Lamin A/C OS=Sus scrofa OX=9823 GN=LMNA PE=1 SV=1	tr|A0A287AE06|A0A287AE06_PIG	149074		-8.4	SYRSVGGSGGGSFGDNLVTR	RT: 64.28
iNS15-R2-1_SW_RB6_01_8020	Lamin A/C OS=Sus scrofa OX=9823 GN=LMNA PE=1 SV=1	tr|A0A287AE06|A0A287AE06_PIG	148846		-8.4	SYRSVGGSGGGSFGDNLVTR	RT: 64.28
iNS15-R2-1_SW_RB6_01_8020	Lamin A/C OS=Sus scrofa OX=9823 GN=LMNA PE=1 SV=1	tr|A0A287AE06|A0A287AE06_PIG	13718		-3.7	SVGGSGGGSFGDNLVTR	RT: 64.07
iNS15-R2-1_SW_RB6_01_8020	Lamin A/C OS=Sus scrofa OX=9823 GN=LMNA PE=1 SV=1	tr|A0A287AE06|A0A287AE06_PIG	20007		-4.1	SVGGSGGGSFGDNLVTR	RT: 64.07
iNS15-R2-1_SW_RB6_01_8020	Lamin A/C OS=Sus scrofa OX=9823 GN=LMNA PE=1 SV=1	tr|A0A287AE06|A0A287AE06_PIG	48602		-3.9	SVGGSGGGSFGDNLVTRSYLLGNSRPR	RT: 35.95
iNS15-R2-1_SW_RB6_01_8020	Lamin A/C OS=Sus scrofa OX=9823 GN=LMNA PE=1 SV=1	tr|A0A287AE06|A0A287AE06_PIG	69502		-5.1	SYLLGNSRPR	RT: 33.72
iNS15-R2-1_SW_RB6_01_8020	Lamin A/C OS=Sus scrofa OX=9823 GN=LMNA PE=1 SV=1	tr|A0A287AE06|A0A287AE06_PIG	2413		4.8	TQSPQNCSIM	RT: 47.79
iNS15-R3-1_SW_RC3_01_8032	Lamin A/C OS=Sus scrofa OX=9823 GN=LMNA PE=1 SV=1	tr|A0A287AE06|A0A287AE06_PIG	74157		-7.3	METPSQR	RT: 27.87
iNS15-R3-1_SW_RC3_01_8032	Lamin A/C OS=Sus scrofa OX=9823 GN=LMNA PE=1 SV=1	tr|A0A287AE06|A0A287AE06_PIG	38988		-2.9	ATRSGAQASSTPLSPTR	RT: 24.18
iNS15-R3-1_SW_RC3_01_8032	Lamin A/C OS=Sus scrofa OX=9823 GN=LMNA PE=1 SV=1	tr|A0A287AE06|A0A287AE06_PIG	4864		6	SGAQASSTPLSPTR	RT: 42.21
iNS15-R3-1_SW_RC3_01_8032	Lamin A/C OS=Sus scrofa OX=9823 GN=LMNA PE=1 SV=1	tr|A0A287AE06|A0A287AE06_PIG	137142		-5.5	SGAQASSTPLSPTR	RT: 42.21
iNS15-R3-1_SW_RC3_01_8032	Lamin A/C OS=Sus scrofa OX=9823 GN=LMNA PE=1 SV=1	tr|A0A287AE06|A0A287AE06_PIG	112176		1.2	SGAQASSTPLSPTRITR	RT: 52.43
iNS15-R3-1_SW_RC3_01_8032	Lamin A/C OS=Sus scrofa OX=9823 GN=LMNA PE=1 SV=1	tr|A0A287AE06|A0A287AE06_PIG	64752		-3.5	LQEKEDLQELNDR	RT: 50.13
iNS15-R3-1_SW_RC3_01_8032	Lamin A/C OS=Sus scrofa OX=9823 GN=LMNA PE=1 SV=1	tr|A0A287AE06|A0A287AE06_PIG	49704		-5.2	LAVYIDR	RT: 61.2
iNS15-R3-1_SW_RC3_01_8032	Lamin A/C OS=Sus scrofa OX=9823 GN=LMNA PE=1 SV=1	tr|A0A287AE06|A0A287AE06_PIG	59280		-3.5	SLETENAGLR	RT: 38.72
iNS15-R3-1_SW_RC3_01_8032	Lamin A/C OS=Sus scrofa OX=9823 GN=LMNA PE=1 SV=1	tr|A0A287AE06|A0A287AE06_PIG	213560		-0.7	SLETENAGLRLR	RT: 57.92
iNS15-R3-1_SW_RC3_01_8032	Lamin A/C OS=Sus scrofa OX=9823 GN=LMNA PE=1 SV=1	tr|A0A287AE06|A0A287AE06_PIG	133285		0.5	SLETENAGLRLR	RT: 57.92
iNS15-R3-1_SW_RC3_01_8032	Lamin A/C OS=Sus scrofa OX=9823 GN=LMNA PE=1 SV=1	tr|A0A287AE06|A0A287AE06_PIG	22667		-5.5	ITESEEVVSR	RT: 37.48
iNS15-R3-1_SW_RC3_01_8032	Lamin A/C OS=Sus scrofa OX=9823 GN=LMNA PE=1 SV=1	tr|A0A287AE06|A0A287AE06_PIG	29545		1.9	EVSGIKSAYEAELGDAR	RT: 42.34
iNS15-R3-1_SW_RC3_01_8032	Lamin A/C OS=Sus scrofa OX=9823 GN=LMNA PE=1 SV=1	tr|A0A287AE06|A0A287AE06_PIG	80712		-3	EVSGIKSAYEAELGDAR	RT: 42.34
iNS15-R3-1_SW_RC3_01_8032	Lamin A/C OS=Sus scrofa OX=9823 GN=LMNA PE=1 SV=1	tr|A0A287AE06|A0A287AE06_PIG	84569		-1.9	EVSGIKSAYEAELGDAR	RT: 42.34
iNS15-R3-1_SW_RC3_01_8032	Lamin A/C OS=Sus scrofa OX=9823 GN=LMNA PE=1 SV=1	tr|A0A287AE06|A0A287AE06_PIG	79515		1.5	SAYEAELGDAR	RT: 65.49
iNS15-R3-1_SW_RC3_01_8032	Lamin A/C OS=Sus scrofa OX=9823 GN=LMNA PE=1 SV=1	tr|A0A287AE06|A0A287AE06_PIG	19722		-1.9	SAYEAELGDARK	RT: 60.92
iNS15-R3-1_SW_RC3_01_8032	Lamin A/C OS=Sus scrofa OX=9823 GN=LMNA PE=1 SV=1	tr|A0A287AE06|A0A287AE06_PIG	5776		0.5	KTLDSVAK	RT: 25.78
iNS15-R3-1_SW_RC3_01_8032	Lamin A/C OS=Sus scrofa OX=9823 GN=LMNA PE=1 SV=1	tr|A0A287AE06|A0A287AE06_PIG	20330		-4.4	TLDSVAKER	RT: 33.3
iNS15-R3-1_SW_RC3_01_8032	Lamin A/C OS=Sus scrofa OX=9823 GN=LMNA PE=1 SV=1	tr|A0A287AE06|A0A287AE06_PIG	234574		5	KEGDLMAAQAR	RT: 64.25
iNS15-R3-1_SW_RC3_01_8032	Lamin A/C OS=Sus scrofa OX=9823 GN=LMNA PE=1 SV=1	tr|A0A287AE06|A0A287AE06_PIG	304		4.7	KEGDLMAAQAR	RT: 55.56
iNS15-R3-1_SW_RC3_01_8032	Lamin A/C OS=Sus scrofa OX=9823 GN=LMNA PE=1 SV=1	tr|A0A287AE06|A0A287AE06_PIG	421192		5.9	KEGDLMAAQAR	RT: 55.56
iNS15-R3-1_SW_RC3_01_8032	Lamin A/C OS=Sus scrofa OX=9823 GN=LMNA PE=1 SV=1	tr|A0A287AE06|A0A287AE06_PIG	77976		1.2	EGDLMAAQAR	RT: 48.04
iNS15-R3-1_SW_RC3_01_8032	Lamin A/C OS=Sus scrofa OX=9823 GN=LMNA PE=1 SV=1	tr|A0A287AE06|A0A287AE06_PIG	46797		0	EGDLMAAQARLK	RT: 67.86
iNS15-R3-1_SW_RC3_01_8032	Lamin A/C OS=Sus scrofa OX=9823 GN=LMNA PE=1 SV=1	tr|A0A287AE06|A0A287AE06_PIG	6821		0	EGDLMAAQARLK	RT: 67.86
iNS15-R3-1_SW_RC3_01_8032	Lamin A/C OS=Sus scrofa OX=9823 GN=LMNA PE=1 SV=1	tr|A0A287AE06|A0A287AE06_PIG	69274		-1.2	LKDLEALLNSK	RT: 69.06
iNS15-R3-1_SW_RC3_01_8032	Lamin A/C OS=Sus scrofa OX=9823 GN=LMNA PE=1 SV=1	tr|A0A287AE06|A0A287AE06_PIG	96729		-4.8	DLEALLNSKEAALSTALSEK	RT: 85.1
iNS15-R3-1_SW_RC3_01_8032	Lamin A/C OS=Sus scrofa OX=9823 GN=LMNA PE=1 SV=1	tr|A0A287AE06|A0A287AE06_PIG	91865		-2.5	EAALSTALSEK	RT: 55.28
iNS15-R3-1_SW_RC3_01_8032	Lamin A/C OS=Sus scrofa OX=9823 GN=LMNA PE=1 SV=1	tr|A0A287AE06|A0A287AE06_PIG	80636		-5.9	RTLEGELHDLR	RT: 73.5
iNS15-R3-1_SW_RC3_01_8032	Lamin A/C OS=Sus scrofa OX=9823 GN=LMNA PE=1 SV=1	tr|A0A287AE06|A0A287AE06_PIG	12236		1.4	GQVAKLEAALGEAK	RT: 186.15
iNS15-R3-1_SW_RC3_01_8032	Lamin A/C OS=Sus scrofa OX=9823 GN=LMNA PE=1 SV=1	tr|A0A287AE06|A0A287AE06_PIG	130093		3.4	LEAALGEAK	RT: 45.61
iNS15-R3-1_SW_RC3_01_8032	Lamin A/C OS=Sus scrofa OX=9823 GN=LMNA PE=1 SV=1	tr|A0A287AE06|A0A287AE06_PIG	28310		-3.2	LEAALGEAKK	RT: 42.48
iNS15-R3-1_SW_RC3_01_8032	Lamin A/C OS=Sus scrofa OX=9823 GN=LMNA PE=1 SV=1	tr|A0A287AE06|A0A287AE06_PIG	37411		-2.5	QLQDEMLRR	RT: 24.18
iNS15-R3-1_SW_RC3_01_8032	Lamin A/C OS=Sus scrofa OX=9823 GN=LMNA PE=1 SV=1	tr|A0A287AE06|A0A287AE06_PIG	44232		-3.3	RVDAENR	RT: 24.18
iNS15-R3-1_SW_RC3_01_8032	Lamin A/C OS=Sus scrofa OX=9823 GN=LMNA PE=1 SV=1	tr|A0A287AE06|A0A287AE06_PIG	64030		0	NIYSEELR	RT: 51.8
iNS15-R3-1_SW_RC3_01_8032	Lamin A/C OS=Sus scrofa OX=9823 GN=LMNA PE=1 SV=1	tr|A0A287AE06|A0A287AE06_PIG	91352		-8.3	LADALQELR	RT: 73.49
iNS15-R3-1_SW_RC3_01_8032	Lamin A/C OS=Sus scrofa OX=9823 GN=LMNA PE=1 SV=1	tr|A0A287AE06|A0A287AE06_PIG	51262		-7.2	ELEKTYSAK	RT: 108.88
iNS15-R3-1_SW_RC3_01_8032	Lamin A/C OS=Sus scrofa OX=9823 GN=LMNA PE=1 SV=1	tr|A0A287AE06|A0A287AE06_PIG	245138		-4.8	TYSAKLDNAR	RT: 37.4
iNS15-R3-1_SW_RC3_01_8032	Lamin A/C OS=Sus scrofa OX=9823 GN=LMNA PE=1 SV=1	tr|A0A287AE06|A0A287AE06_PIG	15390		0.3	QSAERNSNLVGAAHEELQQSR	RT: 59.11
iNS15-R3-1_SW_RC3_01_8032	Lamin A/C OS=Sus scrofa OX=9823 GN=LMNA PE=1 SV=1	tr|A0A287AE06|A0A287AE06_PIG	64277		1.6	NSNLVGAAHEELQQSR	RT: 49.44
iNS15-R3-1_SW_RC3_01_8032	Lamin A/C OS=Sus scrofa OX=9823 GN=LMNA PE=1 SV=1	tr|A0A287AE06|A0A287AE06_PIG	38228		2	NSNLVGAAHEELQQSR	RT: 49.44
iNS15-R3-1_SW_RC3_01_8032	Lamin A/C OS=Sus scrofa OX=9823 GN=LMNA PE=1 SV=1	tr|A0A287AE06|A0A287AE06_PIG	90193		4.8	IRIDSLSAQLSQLQK	RT: 88.44
iNS15-R3-1_SW_RC3_01_8032	Lamin A/C OS=Sus scrofa OX=9823 GN=LMNA PE=1 SV=1	tr|A0A287AE06|A0A287AE06_PIG	134064		-4.6	IDSLSAQLSQLQK	RT: 66.26
iNS15-R3-1_SW_RC3_01_8032	Lamin A/C OS=Sus scrofa OX=9823 GN=LMNA PE=1 SV=1	tr|A0A287AE06|A0A287AE06_PIG	29640		-1.3	QLAAKEAK	RT: 40.88
iNS15-R3-1_SW_RC3_01_8032	Lamin A/C OS=Sus scrofa OX=9823 GN=LMNA PE=1 SV=1	tr|A0A287AE06|A0A287AE06_PIG	59964		-6.3	DLEDSLAR	RT: 29.54
iNS15-R3-1_SW_RC3_01_8032	Lamin A/C OS=Sus scrofa OX=9823 GN=LMNA PE=1 SV=1	tr|A0A287AE06|A0A287AE06_PIG	144818		-1.6	DLEDSLARER	RT: 45.41
iNS15-R3-1_SW_RC3_01_8032	Lamin A/C OS=Sus scrofa OX=9823 GN=LMNA PE=1 SV=1	tr|A0A287AE06|A0A287AE06_PIG	81567		-2.2	DLEDSLARER	RT: 45.41
iNS15-R3-1_SW_RC3_01_8032	Lamin A/C OS=Sus scrofa OX=9823 GN=LMNA PE=1 SV=1	tr|A0A287AE06|A0A287AE06_PIG	73245		-7.4	LLADKER	RT: 27.87
iNS15-R3-1_SW_RC3_01_8032	Lamin A/C OS=Sus scrofa OX=9823 GN=LMNA PE=1 SV=1	tr|A0A287AE06|A0A287AE06_PIG	53922		3.3	EREMAEMR	RT: 56.46
iNS15-R3-1_SW_RC3_01_8032	Lamin A/C OS=Sus scrofa OX=9823 GN=LMNA PE=1 SV=1	tr|A0A287AE06|A0A287AE06_PIG	18069		-0.5	MQQQLDEYQELLDIK	RT: 112.23
iNS15-R3-1_SW_RC3_01_8032	Lamin A/C OS=Sus scrofa OX=9823 GN=LMNA PE=1 SV=1	tr|A0A287AE06|A0A287AE06_PIG	12901		-0.3	LALDMEIHAYR	RT: 23.84
iNS15-R3-1_SW_RC3_01_8032	Lamin A/C OS=Sus scrofa OX=9823 GN=LMNA PE=1 SV=1	tr|A0A287AE06|A0A287AE06_PIG	215517		-0.3	LLEGEEER	RT: 35.06
iNS15-R3-1_SW_RC3_01_8032	Lamin A/C OS=Sus scrofa OX=9823 GN=LMNA PE=1 SV=1	tr|A0A287AE06|A0A287AE06_PIG	41059		3.4	LLEGEEERLR	RT: 40.38
iNS15-R3-1_SW_RC3_01_8032	Lamin A/C OS=Sus scrofa OX=9823 GN=LMNA PE=1 SV=1	tr|A0A287AE06|A0A287AE06_PIG	3629		3.2	LLEGEEERLR	RT: 40.38
iNS15-R3-1_SW_RC3_01_8032	Lamin A/C OS=Sus scrofa OX=9823 GN=LMNA PE=1 SV=1	tr|A0A287AE06|A0A287AE06_PIG	17024		-3.9	LRLSPSPTSQR	RT: 31.9
iNS15-R3-1_SW_RC3_01_8032	Lamin A/C OS=Sus scrofa OX=9823 GN=LMNA PE=1 SV=1	tr|A0A287AE06|A0A287AE06_PIG	101536		2.2	LSPSPTSQR	RT: 44.16
iNS15-R3-1_SW_RC3_01_8032	Lamin A/C OS=Sus scrofa OX=9823 GN=LMNA PE=1 SV=1	tr|A0A287AE06|A0A287AE06_PIG	223022		-2.4	LSPSPTSQRSR	RT: 57.43
iNS15-R3-1_SW_RC3_01_8032	Lamin A/C OS=Sus scrofa OX=9823 GN=LMNA PE=1 SV=1	tr|A0A287AE06|A0A287AE06_PIG	15770		4.1	GRASSHSSQTQSGGSVTK	RT: 78.57
iNS15-R3-1_SW_RC3_01_8032	Lamin A/C OS=Sus scrofa OX=9823 GN=LMNA PE=1 SV=1	tr|A0A287AE06|A0A287AE06_PIG	13015		4.7	ASSHSSQTQSGGSVTKK	RT: 77.67
iNS15-R3-1_SW_RC3_01_8032	Lamin A/C OS=Sus scrofa OX=9823 GN=LMNA PE=1 SV=1	tr|A0A287AE06|A0A287AE06_PIG	20634		-2.6	KLESSESR	RT: 22.93
iNS15-R3-1_SW_RC3_01_8032	Lamin A/C OS=Sus scrofa OX=9823 GN=LMNA PE=1 SV=1	tr|A0A287AE06|A0A287AE06_PIG	63764		-2.6	LESSESR	RT: 47.77
iNS15-R3-1_SW_RC3_01_8032	Lamin A/C OS=Sus scrofa OX=9823 GN=LMNA PE=1 SV=1	tr|A0A287AE06|A0A287AE06_PIG	50825		-3.5	SSFSQHAR	RT: 61.2
iNS15-R3-1_SW_RC3_01_8032	Lamin A/C OS=Sus scrofa OX=9823 GN=LMNA PE=1 SV=1	tr|A0A287AE06|A0A287AE06_PIG	37411		-3.1	VAVEEVDEEGKFVR	RT: 67.45
iNS15-R3-1_SW_RC3_01_8032	Lamin A/C OS=Sus scrofa OX=9823 GN=LMNA PE=1 SV=1	tr|A0A287AE06|A0A287AE06_PIG	36100		-3	VAVEEVDEEGKFVR	RT: 67.45
iNS15-R3-1_SW_RC3_01_8032	Lamin A/C OS=Sus scrofa OX=9823 GN=LMNA PE=1 SV=1	tr|A0A287AE06|A0A287AE06_PIG	33098		-2.6	NKSNEDQSMGNWQIK	RT: 94.36
iNS15-R3-1_SW_RC3_01_8032	Lamin A/C OS=Sus scrofa OX=9823 GN=LMNA PE=1 SV=1	tr|A0A287AE06|A0A287AE06_PIG	92682		-8.1	SNEDQSMGNWQIKR	RT: 73.49
iNS15-R3-1_SW_RC3_01_8032	Lamin A/C OS=Sus scrofa OX=9823 GN=LMNA PE=1 SV=1	tr|A0A287AE06|A0A287AE06_PIG	93328		-8	SNEDQSMGNWQIKR	RT: 73.49
iNS15-R3-1_SW_RC3_01_8032	Lamin A/C OS=Sus scrofa OX=9823 GN=LMNA PE=1 SV=1	tr|A0A287AE06|A0A287AE06_PIG	15504		1.8	FPPKFTLK	RT: 28.56
iNS15-R3-1_SW_RC3_01_8032	Lamin A/C OS=Sus scrofa OX=9823 GN=LMNA PE=1 SV=1	tr|A0A287AE06|A0A287AE06_PIG	45277		-0.7	SQNTWGCGNSLR	RT: 48.61
iNS15-R3-1_SW_RC3_01_8032	Lamin A/C OS=Sus scrofa OX=9823 GN=LMNA PE=1 SV=1	tr|A0A287AE06|A0A287AE06_PIG	24738		-0.6	TALINSTGEEVAMR	RT: 73.64
iNS15-R3-1_SW_RC3_01_8032	Lamin A/C OS=Sus scrofa OX=9823 GN=LMNA PE=1 SV=1	tr|A0A287AE06|A0A287AE06_PIG	188708		-1.7	TALINSTGEEVAMR	RT: 56.2
iNS15-R3-1_SW_RC3_01_8032	Lamin A/C OS=Sus scrofa OX=9823 GN=LMNA PE=1 SV=1	tr|A0A287AE06|A0A287AE06_PIG	96007		-2.6	TVLCGTCGQPADK	RT: 37.4
iNS15-R3-1_SW_RC3_01_8032	Lamin A/C OS=Sus scrofa OX=9823 GN=LMNA PE=1 SV=1	tr|A0A287AE06|A0A287AE06_PIG	101137		-3.9	TVLCGTCGQPADKASASSSGAQVGGSISSGSSASSVTVTR	RT: 68.49
iNS15-R3-1_SW_RC3_01_8032	Lamin A/C OS=Sus scrofa OX=9823 GN=LMNA PE=1 SV=1	tr|A0A287AE06|A0A287AE06_PIG	40527		3.1	ASASSSGAQVGGSISSGSSASSVTVTR	RT: 60.42
iNS15-R3-1_SW_RC3_01_8032	Lamin A/C OS=Sus scrofa OX=9823 GN=LMNA PE=1 SV=1	tr|A0A287AE06|A0A287AE06_PIG	89604		-8.1	SYRSVGGSGGGSFGDNLVTR	RT: 73.49
iNS15-R3-1_SW_RC3_01_8032	Lamin A/C OS=Sus scrofa OX=9823 GN=LMNA PE=1 SV=1	tr|A0A287AE06|A0A287AE06_PIG	91523		-8	SYRSVGGSGGGSFGDNLVTR	RT: 73.49
iNS15-R3-1_SW_RC3_01_8032	Lamin A/C OS=Sus scrofa OX=9823 GN=LMNA PE=1 SV=1	tr|A0A287AE06|A0A287AE06_PIG	22040		-4.4	SVGGSGGGSFGDNLVTR	RT: 73.49
iNS15-R3-1_SW_RC3_01_8032	Lamin A/C OS=Sus scrofa OX=9823 GN=LMNA PE=1 SV=1	tr|A0A287AE06|A0A287AE06_PIG	117762		-7.1	SVGGSGGGSFGDNLVTR	RT: 73.49
iNS15-R3-1_SW_RC3_01_8032	Lamin A/C OS=Sus scrofa OX=9823 GN=LMNA PE=1 SV=1	tr|A0A287AE06|A0A287AE06_PIG	63878		-8	SVGGSGGGSFGDNLVTRSYLLGNSRPR	RT: 29.54
iNS15-R3-1_SW_RC3_01_8032	Lamin A/C OS=Sus scrofa OX=9823 GN=LMNA PE=1 SV=1	tr|A0A287AE06|A0A287AE06_PIG	72808		-7.7	SYLLGNSRPR	RT: 29.54
iNS15-R3-1_SW_RC3_01_8032	Lamin A/C OS=Sus scrofa OX=9823 GN=LMNA PE=1 SV=1	tr|A0A287AE06|A0A287AE06_PIG	53067		-5.1	TQSPQNCSIM	RT: 46.38
iNS7-R1-1_SW_RA8_01_8013	Lamin A/C OS=Sus scrofa OX=9823 GN=LMNA PE=1 SV=1	tr|A0A287AE06|A0A287AE06_PIG	442301		-4.9	METPSQR	RT: 34.4
iNS7-R1-1_SW_RA8_01_8013	Lamin A/C OS=Sus scrofa OX=9823 GN=LMNA PE=1 SV=1	tr|A0A287AE06|A0A287AE06_PIG	276621		-5.2	ATRSGAQASSTPLSPTR	RT: 30.09
iNS7-R1-1_SW_RA8_01_8013	Lamin A/C OS=Sus scrofa OX=9823 GN=LMNA PE=1 SV=1	tr|A0A287AE06|A0A287AE06_PIG	160189		4.9	SGAQASSTPLSPTR	RT: 57.07
iNS7-R1-1_SW_RA8_01_8013	Lamin A/C OS=Sus scrofa OX=9823 GN=LMNA PE=1 SV=1	tr|A0A287AE06|A0A287AE06_PIG	761596		-3.8	SGAQASSTPLSPTR	RT: 57.07
iNS7-R1-1_SW_RA8_01_8013	Lamin A/C OS=Sus scrofa OX=9823 GN=LMNA PE=1 SV=1	tr|A0A287AE06|A0A287AE06_PIG	91561		-7.8	SGAQASSTPLSPTRITR	RT: 52.06
iNS7-R1-1_SW_RA8_01_8013	Lamin A/C OS=Sus scrofa OX=9823 GN=LMNA PE=1 SV=1	tr|A0A287AE06|A0A287AE06_PIG	554059		-6.5	LQEKEDLQELNDR	RT: 52.28
iNS7-R1-1_SW_RA8_01_8013	Lamin A/C OS=Sus scrofa OX=9823 GN=LMNA PE=1 SV=1	tr|A0A287AE06|A0A287AE06_PIG	987221		-9.3	LAVYIDR	RT: 64.3
iNS7-R1-1_SW_RA8_01_8013	Lamin A/C OS=Sus scrofa OX=9823 GN=LMNA PE=1 SV=1	tr|A0A287AE06|A0A287AE06_PIG	606461		-6.2	SLETENAGLR	RT: 53.6
iNS7-R1-1_SW_RA8_01_8013	Lamin A/C OS=Sus scrofa OX=9823 GN=LMNA PE=1 SV=1	tr|A0A287AE06|A0A287AE06_PIG	1965360		-4.7	SLETENAGLRLR	RT: 68.47
iNS7-R1-1_SW_RA8_01_8013	Lamin A/C OS=Sus scrofa OX=9823 GN=LMNA PE=1 SV=1	tr|A0A287AE06|A0A287AE06_PIG	1822309		-5.2	SLETENAGLRLR	RT: 68.47
iNS7-R1-1_SW_RA8_01_8013	Lamin A/C OS=Sus scrofa OX=9823 GN=LMNA PE=1 SV=1	tr|A0A287AE06|A0A287AE06_PIG	29602		-4	ITESEEVVSR	RT: 40.37
iNS7-R1-1_SW_RA8_01_8013	Lamin A/C OS=Sus scrofa OX=9823 GN=LMNA PE=1 SV=1	tr|A0A287AE06|A0A287AE06_PIG	2280		-3.3	EVSGIKSAYEAELGDAR	RT: 17.71
iNS7-R1-1_SW_RA8_01_8013	Lamin A/C OS=Sus scrofa OX=9823 GN=LMNA PE=1 SV=1	tr|A0A287AE06|A0A287AE06_PIG	166896		0.1	EVSGIKSAYEAELGDAR	RT: 17.71
iNS7-R1-1_SW_RA8_01_8013	Lamin A/C OS=Sus scrofa OX=9823 GN=LMNA PE=1 SV=1	tr|A0A287AE06|A0A287AE06_PIG	1640897		-6	EVSGIKSAYEAELGDAR	RT: 17.71
iNS7-R1-1_SW_RA8_01_8013	Lamin A/C OS=Sus scrofa OX=9823 GN=LMNA PE=1 SV=1	tr|A0A287AE06|A0A287AE06_PIG	1539988		-8.2	SAYEAELGDAR	RT: 68.19
iNS7-R1-1_SW_RA8_01_8013	Lamin A/C OS=Sus scrofa OX=9823 GN=LMNA PE=1 SV=1	tr|A0A287AE06|A0A287AE06_PIG	28253		-3.9	SAYEAELGDARK	RT: 62.14
iNS7-R1-1_SW_RA8_01_8013	Lamin A/C OS=Sus scrofa OX=9823 GN=LMNA PE=1 SV=1	tr|A0A287AE06|A0A287AE06_PIG	3876		-5	KTLDSVAK	RT: 26.95
iNS7-R1-1_SW_RA8_01_8013	Lamin A/C OS=Sus scrofa OX=9823 GN=LMNA PE=1 SV=1	tr|A0A287AE06|A0A287AE06_PIG	335179		-6.1	TLDSVAKER	RT: 34.19
iNS7-R1-1_SW_RA8_01_8013	Lamin A/C OS=Sus scrofa OX=9823 GN=LMNA PE=1 SV=1	tr|A0A287AE06|A0A287AE06_PIG	1540425		-6.1	KEGDLMAAQAR	RT: 64.37
iNS7-R1-1_SW_RA8_01_8013	Lamin A/C OS=Sus scrofa OX=9823 GN=LMNA PE=1 SV=1	tr|A0A287AE06|A0A287AE06_PIG	793326		-5	KEGDLMAAQAR	RT: 56.65
iNS7-R1-1_SW_RA8_01_8013	Lamin A/C OS=Sus scrofa OX=9823 GN=LMNA PE=1 SV=1	tr|A0A287AE06|A0A287AE06_PIG	843847		-4.8	KEGDLMAAQAR	RT: 56.65
iNS7-R1-1_SW_RA8_01_8013	Lamin A/C OS=Sus scrofa OX=9823 GN=LMNA PE=1 SV=1	tr|A0A287AE06|A0A287AE06_PIG	1730463		-7.2	EGDLMAAQAR	RT: 68.33
iNS7-R1-1_SW_RA8_01_8013	Lamin A/C OS=Sus scrofa OX=9823 GN=LMNA PE=1 SV=1	tr|A0A287AE06|A0A287AE06_PIG	28823		1.7	EGDLMAAQARLK	RT: 68.55
iNS7-R1-1_SW_RA8_01_8013	Lamin A/C OS=Sus scrofa OX=9823 GN=LMNA PE=1 SV=1	tr|A0A287AE06|A0A287AE06_PIG	137978		0.2	EGDLMAAQARLK	RT: 68.55
iNS7-R1-1_SW_RA8_01_8013	Lamin A/C OS=Sus scrofa OX=9823 GN=LMNA PE=1 SV=1	tr|A0A287AE06|A0A287AE06_PIG	42009		-6.3	LKDLEALLNSK	RT: 68.95
iNS7-R1-1_SW_RA8_01_8013	Lamin A/C OS=Sus scrofa OX=9823 GN=LMNA PE=1 SV=1	tr|A0A287AE06|A0A287AE06_PIG	201685		0.4	DLEALLNSKEAALSTALSEK	RT: 83.83
iNS7-R1-1_SW_RA8_01_8013	Lamin A/C OS=Sus scrofa OX=9823 GN=LMNA PE=1 SV=1	tr|A0A287AE06|A0A287AE06_PIG	174800		0.2	EAALSTALSEK	RT: 57.9
iNS7-R1-1_SW_RA8_01_8013	Lamin A/C OS=Sus scrofa OX=9823 GN=LMNA PE=1 SV=1	tr|A0A287AE06|A0A287AE06_PIG	937726		-6.6	RTLEGELHDLR	RT: 70.48
iNS7-R1-1_SW_RA8_01_8013	Lamin A/C OS=Sus scrofa OX=9823 GN=LMNA PE=1 SV=1	tr|A0A287AE06|A0A287AE06_PIG	26752		2.5	GQVAKLEAALGEAK	RT: 185.54
iNS7-R1-1_SW_RA8_01_8013	Lamin A/C OS=Sus scrofa OX=9823 GN=LMNA PE=1 SV=1	tr|A0A287AE06|A0A287AE06_PIG	225207		2.6	LEAALGEAK	RT: 70.2
iNS7-R1-1_SW_RA8_01_8013	Lamin A/C OS=Sus scrofa OX=9823 GN=LMNA PE=1 SV=1	tr|A0A287AE06|A0A287AE06_PIG	22002		-2.1	LEAALGEAKK	RT: 48.79
iNS7-R1-1_SW_RA8_01_8013	Lamin A/C OS=Sus scrofa OX=9823 GN=LMNA PE=1 SV=1	tr|A0A287AE06|A0A287AE06_PIG	200488		-3.8	QLQDEMLRR	RT: 32.24
iNS7-R1-1_SW_RA8_01_8013	Lamin A/C OS=Sus scrofa OX=9823 GN=LMNA PE=1 SV=1	tr|A0A287AE06|A0A287AE06_PIG	466488		-4.7	RVDAENR	RT: 34.4
iNS7-R1-1_SW_RA8_01_8013	Lamin A/C OS=Sus scrofa OX=9823 GN=LMNA PE=1 SV=1	tr|A0A287AE06|A0A287AE06_PIG	596752		-4.6	NIYSEELR	RT: 54.91
iNS7-R1-1_SW_RA8_01_8013	Lamin A/C OS=Sus scrofa OX=9823 GN=LMNA PE=1 SV=1	tr|A0A287AE06|A0A287AE06_PIG	1587336		-7.7	LADALQELR	RT: 70.84
iNS7-R1-1_SW_RA8_01_8013	Lamin A/C OS=Sus scrofa OX=9823 GN=LMNA PE=1 SV=1	tr|A0A287AE06|A0A287AE06_PIG	110618		1.1	ELEKTYSAK	RT: 106.98
iNS7-R1-1_SW_RA8_01_8013	Lamin A/C OS=Sus scrofa OX=9823 GN=LMNA PE=1 SV=1	tr|A0A287AE06|A0A287AE06_PIG	431490		-0.2	TYSAKLDNAR	RT: 37.32
iNS7-R1-1_SW_RA8_01_8013	Lamin A/C OS=Sus scrofa OX=9823 GN=LMNA PE=1 SV=1	tr|A0A287AE06|A0A287AE06_PIG	10564		-1.4	QSAERNSNLVGAAHEELQQSR	RT: 53.39
iNS7-R1-1_SW_RA8_01_8013	Lamin A/C OS=Sus scrofa OX=9823 GN=LMNA PE=1 SV=1	tr|A0A287AE06|A0A287AE06_PIG	242307		-1	NSNLVGAAHEELQQSR	RT: 71.67
iNS7-R1-1_SW_RA8_01_8013	Lamin A/C OS=Sus scrofa OX=9823 GN=LMNA PE=1 SV=1	tr|A0A287AE06|A0A287AE06_PIG	145008		-0.2	NSNLVGAAHEELQQSR	RT: 71.67
iNS7-R1-1_SW_RA8_01_8013	Lamin A/C OS=Sus scrofa OX=9823 GN=LMNA PE=1 SV=1	tr|A0A287AE06|A0A287AE06_PIG	232408		-5.1	IRIDSLSAQLSQLQK	RT: 87.09
iNS7-R1-1_SW_RA8_01_8013	Lamin A/C OS=Sus scrofa OX=9823 GN=LMNA PE=1 SV=1	tr|A0A287AE06|A0A287AE06_PIG	261022		-1.6	IDSLSAQLSQLQK	RT: 66.59
iNS7-R1-1_SW_RA8_01_8013	Lamin A/C OS=Sus scrofa OX=9823 GN=LMNA PE=1 SV=1	tr|A0A287AE06|A0A287AE06_PIG	31540		0.2	QLAAKEAK	RT: 39.82
iNS7-R1-1_SW_RA8_01_8013	Lamin A/C OS=Sus scrofa OX=9823 GN=LMNA PE=1 SV=1	tr|A0A287AE06|A0A287AE06_PIG	495805		-5.2	DLEDSLAR	RT: 48.65
iNS7-R1-1_SW_RA8_01_8013	Lamin A/C OS=Sus scrofa OX=9823 GN=LMNA PE=1 SV=1	tr|A0A287AE06|A0A287AE06_PIG	1387152		-4.3	DLEDSLARER	RT: 68.67
iNS7-R1-1_SW_RA8_01_8013	Lamin A/C OS=Sus scrofa OX=9823 GN=LMNA PE=1 SV=1	tr|A0A287AE06|A0A287AE06_PIG	1383200		-4.4	DLEDSLARER	RT: 68.67
iNS7-R1-1_SW_RA8_01_8013	Lamin A/C OS=Sus scrofa OX=9823 GN=LMNA PE=1 SV=1	tr|A0A287AE06|A0A287AE06_PIG	255892		-5.3	LLADKER	RT: 30.09
iNS7-R1-1_SW_RA8_01_8013	Lamin A/C OS=Sus scrofa OX=9823 GN=LMNA PE=1 SV=1	tr|A0A287AE06|A0A287AE06_PIG	1024537		-8.4	EREMAEMR	RT: 64.3
iNS7-R1-1_SW_RA8_01_8013	Lamin A/C OS=Sus scrofa OX=9823 GN=LMNA PE=1 SV=1	tr|A0A287AE06|A0A287AE06_PIG	44080		0.2	MQQQLDEYQELLDIK	RT: 115.39
iNS7-R1-1_SW_RA8_01_8013	Lamin A/C OS=Sus scrofa OX=9823 GN=LMNA PE=1 SV=1	tr|A0A287AE06|A0A287AE06_PIG	41534		1	LALDMEIHAYR	RT: 26.53
iNS7-R1-1_SW_RA8_01_8013	Lamin A/C OS=Sus scrofa OX=9823 GN=LMNA PE=1 SV=1	tr|A0A287AE06|A0A287AE06_PIG	1229072		-5.4	LLEGEEER	RT: 65.41
iNS7-R1-1_SW_RA8_01_8013	Lamin A/C OS=Sus scrofa OX=9823 GN=LMNA PE=1 SV=1	tr|A0A287AE06|A0A287AE06_PIG	713431		-5.3	LLEGEEERLR	RT: 60.34
iNS7-R1-1_SW_RA8_01_8013	Lamin A/C OS=Sus scrofa OX=9823 GN=LMNA PE=1 SV=1	tr|A0A287AE06|A0A287AE06_PIG	715160		-5.3	LLEGEEERLR	RT: 60.34
iNS7-R1-1_SW_RA8_01_8013	Lamin A/C OS=Sus scrofa OX=9823 GN=LMNA PE=1 SV=1	tr|A0A287AE06|A0A287AE06_PIG	266665		-6	LRLSPSPTSQR	RT: 32.45
iNS7-R1-1_SW_RA8_01_8013	Lamin A/C OS=Sus scrofa OX=9823 GN=LMNA PE=1 SV=1	tr|A0A287AE06|A0A287AE06_PIG	2856327		-6.9	LSPSPTSQR	RT: 17.63
iNS7-R1-1_SW_RA8_01_8013	Lamin A/C OS=Sus scrofa OX=9823 GN=LMNA PE=1 SV=1	tr|A0A287AE06|A0A287AE06_PIG	1567196		-8.4	LSPSPTSQRSR	RT: 64.51
iNS7-R1-1_SW_RA8_01_8013	Lamin A/C OS=Sus scrofa OX=9823 GN=LMNA PE=1 SV=1	tr|A0A287AE06|A0A287AE06_PIG	46417		-3.3	GRASSHSSQTQSGGSVTK	RT: 77.58
iNS7-R1-1_SW_RA8_01_8013	Lamin A/C OS=Sus scrofa OX=9823 GN=LMNA PE=1 SV=1	tr|A0A287AE06|A0A287AE06_PIG	27094		-1.7	ASSHSSQTQSGGSVTKK	RT: 79.88
iNS7-R1-1_SW_RA8_01_8013	Lamin A/C OS=Sus scrofa OX=9823 GN=LMNA PE=1 SV=1	tr|A0A287AE06|A0A287AE06_PIG	2007521		-5.5	KLESSESR	RT: 17.7
iNS7-R1-1_SW_RA8_01_8013	Lamin A/C OS=Sus scrofa OX=9823 GN=LMNA PE=1 SV=1	tr|A0A287AE06|A0A287AE06_PIG	386346		-3.1	LESSESR	RT: 48.1
iNS7-R1-1_SW_RA8_01_8013	Lamin A/C OS=Sus scrofa OX=9823 GN=LMNA PE=1 SV=1	tr|A0A287AE06|A0A287AE06_PIG	1762554		-6.1	SSFSQHAR	RT: 64.64
iNS7-R1-1_SW_RA8_01_8013	Lamin A/C OS=Sus scrofa OX=9823 GN=LMNA PE=1 SV=1	tr|A0A287AE06|A0A287AE06_PIG	1123166		-6.8	VAVEEVDEEGKFVR	RT: 65.55
iNS7-R1-1_SW_RA8_01_8013	Lamin A/C OS=Sus scrofa OX=9823 GN=LMNA PE=1 SV=1	tr|A0A287AE06|A0A287AE06_PIG	1076692		-7.1	VAVEEVDEEGKFVR	RT: 65.55
iNS7-R1-1_SW_RA8_01_8013	Lamin A/C OS=Sus scrofa OX=9823 GN=LMNA PE=1 SV=1	tr|A0A287AE06|A0A287AE06_PIG	169290		-7.5	NKSNEDQSMGNWQIK	RT: 94.06
iNS7-R1-1_SW_RA8_01_8013	Lamin A/C OS=Sus scrofa OX=9823 GN=LMNA PE=1 SV=1	tr|A0A287AE06|A0A287AE06_PIG	1570825		-7.3	SNEDQSMGNWQIKR	RT: 68.26
iNS7-R1-1_SW_RA8_01_8013	Lamin A/C OS=Sus scrofa OX=9823 GN=LMNA PE=1 SV=1	tr|A0A287AE06|A0A287AE06_PIG	1592656		-7.2	SNEDQSMGNWQIKR	RT: 68.26
iNS7-R1-1_SW_RA8_01_8013	Lamin A/C OS=Sus scrofa OX=9823 GN=LMNA PE=1 SV=1	tr|A0A287AE06|A0A287AE06_PIG	5244		-3.2	FPPKFTLK	RT: 28.41
iNS7-R1-1_SW_RA8_01_8013	Lamin A/C OS=Sus scrofa OX=9823 GN=LMNA PE=1 SV=1	tr|A0A287AE06|A0A287AE06_PIG	568005		-7.3	SQNTWGCGNSLR	RT: 48.16
iNS7-R1-1_SW_RA8_01_8013	Lamin A/C OS=Sus scrofa OX=9823 GN=LMNA PE=1 SV=1	tr|A0A287AE06|A0A287AE06_PIG	197201		0.1	TALINSTGEEVAMR	RT: 74.24
iNS7-R1-1_SW_RA8_01_8013	Lamin A/C OS=Sus scrofa OX=9823 GN=LMNA PE=1 SV=1	tr|A0A287AE06|A0A287AE06_PIG	645658		-6.4	TALINSTGEEVAMR	RT: 53.38
iNS7-R1-1_SW_RA8_01_8013	Lamin A/C OS=Sus scrofa OX=9823 GN=LMNA PE=1 SV=1	tr|A0A287AE06|A0A287AE06_PIG	138149		-0.1	TVLCGTCGQPADK	RT: 41.77
iNS7-R1-1_SW_RA8_01_8013	Lamin A/C OS=Sus scrofa OX=9823 GN=LMNA PE=1 SV=1	tr|A0A287AE06|A0A287AE06_PIG	304532		-6.7	TVLCGTCGQPADKASASSSGAQVGGSISSGSSASSVTVTR	RT: 69.58
iNS7-R1-1_SW_RA8_01_8013	Lamin A/C OS=Sus scrofa OX=9823 GN=LMNA PE=1 SV=1	tr|A0A287AE06|A0A287AE06_PIG	48222		-6.9	ASASSSGAQVGGSISSGSSASSVTVTR	RT: 63.67
iNS7-R1-1_SW_RA8_01_8013	Lamin A/C OS=Sus scrofa OX=9823 GN=LMNA PE=1 SV=1	tr|A0A287AE06|A0A287AE06_PIG	1869296		-7.4	SYRSVGGSGGGSFGDNLVTR	RT: 70.84
iNS7-R1-1_SW_RA8_01_8013	Lamin A/C OS=Sus scrofa OX=9823 GN=LMNA PE=1 SV=1	tr|A0A287AE06|A0A287AE06_PIG	1817768		-7.6	SYRSVGGSGGGSFGDNLVTR	RT: 70.84
iNS7-R1-1_SW_RA8_01_8013	Lamin A/C OS=Sus scrofa OX=9823 GN=LMNA PE=1 SV=1	tr|A0A287AE06|A0A287AE06_PIG	124887		-0.9	SVGGSGGGSFGDNLVTR	RT: 70.84
iNS7-R1-1_SW_RA8_01_8013	Lamin A/C OS=Sus scrofa OX=9823 GN=LMNA PE=1 SV=1	tr|A0A287AE06|A0A287AE06_PIG	1585835		-7.3	SVGGSGGGSFGDNLVTR	RT: 70.84
iNS7-R1-1_SW_RA8_01_8013	Lamin A/C OS=Sus scrofa OX=9823 GN=LMNA PE=1 SV=1	tr|A0A287AE06|A0A287AE06_PIG	1670803		-8	SVGGSGGGSFGDNLVTRSYLLGNSRPR	RT: 64.44
iNS7-R1-1_SW_RA8_01_8013	Lamin A/C OS=Sus scrofa OX=9823 GN=LMNA PE=1 SV=1	tr|A0A287AE06|A0A287AE06_PIG	403446		-4.8	SYLLGNSRPR	RT: 34.47
iNS7-R1-1_SW_RA8_01_8013	Lamin A/C OS=Sus scrofa OX=9823 GN=LMNA PE=1 SV=1	tr|A0A287AE06|A0A287AE06_PIG	34390		5.1	TQSPQNCSIM	RT: 47.95
iNS7-R2-1_SW_RB5_01_8019	Lamin A/C OS=Sus scrofa OX=9823 GN=LMNA PE=1 SV=1	tr|A0A287AE06|A0A287AE06_PIG	1495908		-5.3	METPSQR	RT: 17.7
iNS7-R2-1_SW_RB5_01_8019	Lamin A/C OS=Sus scrofa OX=9823 GN=LMNA PE=1 SV=1	tr|A0A287AE06|A0A287AE06_PIG	196213		-6.5	ATRSGAQASSTPLSPTR	RT: 33.29
iNS7-R2-1_SW_RB5_01_8019	Lamin A/C OS=Sus scrofa OX=9823 GN=LMNA PE=1 SV=1	tr|A0A287AE06|A0A287AE06_PIG	37848		-6.7	SGAQASSTPLSPTR	RT: 43.04
iNS7-R2-1_SW_RB5_01_8019	Lamin A/C OS=Sus scrofa OX=9823 GN=LMNA PE=1 SV=1	tr|A0A287AE06|A0A287AE06_PIG	576251		-6.9	SGAQASSTPLSPTR	RT: 43.04
iNS7-R2-1_SW_RB5_01_8019	Lamin A/C OS=Sus scrofa OX=9823 GN=LMNA PE=1 SV=1	tr|A0A287AE06|A0A287AE06_PIG	79059		-9.2	SGAQASSTPLSPTRITR	RT: 48.82
iNS7-R2-1_SW_RB5_01_8019	Lamin A/C OS=Sus scrofa OX=9823 GN=LMNA PE=1 SV=1	tr|A0A287AE06|A0A287AE06_PIG	516933		-2.3	LQEKEDLQELNDR	RT: 49.99
iNS7-R2-1_SW_RB5_01_8019	Lamin A/C OS=Sus scrofa OX=9823 GN=LMNA PE=1 SV=1	tr|A0A287AE06|A0A287AE06_PIG	296647		-5.1	LAVYIDR	RT: 62.93
iNS7-R2-1_SW_RB5_01_8019	Lamin A/C OS=Sus scrofa OX=9823 GN=LMNA PE=1 SV=1	tr|A0A287AE06|A0A287AE06_PIG	590957		-6.1	SLETENAGLR	RT: 43.04
iNS7-R2-1_SW_RB5_01_8019	Lamin A/C OS=Sus scrofa OX=9823 GN=LMNA PE=1 SV=1	tr|A0A287AE06|A0A287AE06_PIG	581609		-1.5	SLETENAGLRLR	RT: 52.01
iNS7-R2-1_SW_RB5_01_8019	Lamin A/C OS=Sus scrofa OX=9823 GN=LMNA PE=1 SV=1	tr|A0A287AE06|A0A287AE06_PIG	533026		-1.5	SLETENAGLRLR	RT: 52.01
iNS7-R2-1_SW_RB5_01_8019	Lamin A/C OS=Sus scrofa OX=9823 GN=LMNA PE=1 SV=1	tr|A0A287AE06|A0A287AE06_PIG	47291		-3.7	ITESEEVVSR	RT: 38.93
iNS7-R2-1_SW_RB5_01_8019	Lamin A/C OS=Sus scrofa OX=9823 GN=LMNA PE=1 SV=1	tr|A0A287AE06|A0A287AE06_PIG	6270		0.1	EVSGIKSAYEAELGDAR	RT: 17.64
iNS7-R2-1_SW_RB5_01_8019	Lamin A/C OS=Sus scrofa OX=9823 GN=LMNA PE=1 SV=1	tr|A0A287AE06|A0A287AE06_PIG	180633		0.1	EVSGIKSAYEAELGDAR	RT: 17.64
iNS7-R2-1_SW_RB5_01_8019	Lamin A/C OS=Sus scrofa OX=9823 GN=LMNA PE=1 SV=1	tr|A0A287AE06|A0A287AE06_PIG	937707		-5.5	EVSGIKSAYEAELGDAR	RT: 17.64
iNS7-R2-1_SW_RB5_01_8019	Lamin A/C OS=Sus scrofa OX=9823 GN=LMNA PE=1 SV=1	tr|A0A287AE06|A0A287AE06_PIG	403541		-1.8	SAYEAELGDAR	RT: 61.68
iNS7-R2-1_SW_RB5_01_8019	Lamin A/C OS=Sus scrofa OX=9823 GN=LMNA PE=1 SV=1	tr|A0A287AE06|A0A287AE06_PIG	31369		5.2	SAYEAELGDARK	RT: 60.02
iNS7-R2-1_SW_RB5_01_8019	Lamin A/C OS=Sus scrofa OX=9823 GN=LMNA PE=1 SV=1	tr|A0A287AE06|A0A287AE06_PIG	5776		5.7	KTLDSVAK	RT: 23.83
iNS7-R2-1_SW_RB5_01_8019	Lamin A/C OS=Sus scrofa OX=9823 GN=LMNA PE=1 SV=1	tr|A0A287AE06|A0A287AE06_PIG	200507		-7	TLDSVAKER	RT: 33.3
iNS7-R2-1_SW_RB5_01_8019	Lamin A/C OS=Sus scrofa OX=9823 GN=LMNA PE=1 SV=1	tr|A0A287AE06|A0A287AE06_PIG	677027		-4.6	KEGDLMAAQAR	RT: 48.67
iNS7-R2-1_SW_RB5_01_8019	Lamin A/C OS=Sus scrofa OX=9823 GN=LMNA PE=1 SV=1	tr|A0A287AE06|A0A287AE06_PIG	605435		-2.6	KEGDLMAAQAR	RT: 55.91
iNS7-R2-1_SW_RB5_01_8019	Lamin A/C OS=Sus scrofa OX=9823 GN=LMNA PE=1 SV=1	tr|A0A287AE06|A0A287AE06_PIG	585827		-2.6	KEGDLMAAQAR	RT: 55.91
iNS7-R2-1_SW_RB5_01_8019	Lamin A/C OS=Sus scrofa OX=9823 GN=LMNA PE=1 SV=1	tr|A0A287AE06|A0A287AE06_PIG	890644		-3.9	EGDLMAAQAR	RT: 48.39
iNS7-R2-1_SW_RB5_01_8019	Lamin A/C OS=Sus scrofa OX=9823 GN=LMNA PE=1 SV=1	tr|A0A287AE06|A0A287AE06_PIG	71649		3	EGDLMAAQARLK	RT: 70.87
iNS7-R2-1_SW_RB5_01_8019	Lamin A/C OS=Sus scrofa OX=9823 GN=LMNA PE=1 SV=1	tr|A0A287AE06|A0A287AE06_PIG	28747		-4.1	EGDLMAAQARLK	RT: 70.87
iNS7-R2-1_SW_RB5_01_8019	Lamin A/C OS=Sus scrofa OX=9823 GN=LMNA PE=1 SV=1	tr|A0A287AE06|A0A287AE06_PIG	22458		-0.8	LKDLEALLNSK	RT: 68.78
iNS7-R2-1_SW_RB5_01_8019	Lamin A/C OS=Sus scrofa OX=9823 GN=LMNA PE=1 SV=1	tr|A0A287AE06|A0A287AE06_PIG	100244		-2.7	DLEALLNSKEAALSTALSEK	RT: 85.88
iNS7-R2-1_SW_RB5_01_8019	Lamin A/C OS=Sus scrofa OX=9823 GN=LMNA PE=1 SV=1	tr|A0A287AE06|A0A287AE06_PIG	134311		1.3	EAALSTALSEK	RT: 58.13
iNS7-R2-1_SW_RB5_01_8019	Lamin A/C OS=Sus scrofa OX=9823 GN=LMNA PE=1 SV=1	tr|A0A287AE06|A0A287AE06_PIG	329327		-8.2	RTLEGELHDLR	RT: 73.5
iNS7-R2-1_SW_RB5_01_8019	Lamin A/C OS=Sus scrofa OX=9823 GN=LMNA PE=1 SV=1	tr|A0A287AE06|A0A287AE06_PIG	2033		0.5	GQVAKLEAALGEAK	RT: 185.34
iNS7-R2-1_SW_RB5_01_8019	Lamin A/C OS=Sus scrofa OX=9823 GN=LMNA PE=1 SV=1	tr|A0A287AE06|A0A287AE06_PIG	98439		4.9	LEAALGEAK	RT: 66.69
iNS7-R2-1_SW_RB5_01_8019	Lamin A/C OS=Sus scrofa OX=9823 GN=LMNA PE=1 SV=1	tr|A0A287AE06|A0A287AE06_PIG	68837		-3.8	LEAALGEAKK	RT: 40.67
iNS7-R2-1_SW_RB5_01_8019	Lamin A/C OS=Sus scrofa OX=9823 GN=LMNA PE=1 SV=1	tr|A0A287AE06|A0A287AE06_PIG	275139		-4.2	QLQDEMLRR	RT: 30.03
iNS7-R2-1_SW_RB5_01_8019	Lamin A/C OS=Sus scrofa OX=9823 GN=LMNA PE=1 SV=1	tr|A0A287AE06|A0A287AE06_PIG	388094		-7.5	RVDAENR	RT: 42.55
iNS7-R2-1_SW_RB5_01_8019	Lamin A/C OS=Sus scrofa OX=9823 GN=LMNA PE=1 SV=1	tr|A0A287AE06|A0A287AE06_PIG	1309575		-6.9	NIYSEELR	RT: 52.85
iNS7-R2-1_SW_RB5_01_8019	Lamin A/C OS=Sus scrofa OX=9823 GN=LMNA PE=1 SV=1	tr|A0A287AE06|A0A287AE06_PIG	531259		-6.2	LADALQELR	RT: 57.09
iNS7-R2-1_SW_RB5_01_8019	Lamin A/C OS=Sus scrofa OX=9823 GN=LMNA PE=1 SV=1	tr|A0A287AE06|A0A287AE06_PIG	988		-4.9	ELEKTYSAK	RT: 105.89
iNS7-R2-1_SW_RB5_01_8019	Lamin A/C OS=Sus scrofa OX=9823 GN=LMNA PE=1 SV=1	tr|A0A287AE06|A0A287AE06_PIG	308959		-3.9	TYSAKLDNAR	RT: 35.67
iNS7-R2-1_SW_RB5_01_8019	Lamin A/C OS=Sus scrofa OX=9823 GN=LMNA PE=1 SV=1	tr|A0A287AE06|A0A287AE06_PIG	17043		-8.8	QSAERNSNLVGAAHEELQQSR	RT: 49.23
iNS7-R2-1_SW_RB5_01_8019	Lamin A/C OS=Sus scrofa OX=9823 GN=LMNA PE=1 SV=1	tr|A0A287AE06|A0A287AE06_PIG	136401		-0.1	NSNLVGAAHEELQQSR	RT: 70.87
iNS7-R2-1_SW_RB5_01_8019	Lamin A/C OS=Sus scrofa OX=9823 GN=LMNA PE=1 SV=1	tr|A0A287AE06|A0A287AE06_PIG	136591		0	NSNLVGAAHEELQQSR	RT: 70.87
iNS7-R2-1_SW_RB5_01_8019	Lamin A/C OS=Sus scrofa OX=9823 GN=LMNA PE=1 SV=1	tr|A0A287AE06|A0A287AE06_PIG	66063		-0.9	IRIDSLSAQLSQLQK	RT: 89.77
iNS7-R2-1_SW_RB5_01_8019	Lamin A/C OS=Sus scrofa OX=9823 GN=LMNA PE=1 SV=1	tr|A0A287AE06|A0A287AE06_PIG	97375		2.9	IDSLSAQLSQLQK	RT: 66.69
iNS7-R2-1_SW_RB5_01_8019	Lamin A/C OS=Sus scrofa OX=9823 GN=LMNA PE=1 SV=1	tr|A0A287AE06|A0A287AE06_PIG	34732		2.3	QLAAKEAK	RT: 39.07
iNS7-R2-1_SW_RB5_01_8019	Lamin A/C OS=Sus scrofa OX=9823 GN=LMNA PE=1 SV=1	tr|A0A287AE06|A0A287AE06_PIG	570741		-6.1	DLEDSLAR	RT: 43.04
iNS7-R2-1_SW_RB5_01_8019	Lamin A/C OS=Sus scrofa OX=9823 GN=LMNA PE=1 SV=1	tr|A0A287AE06|A0A287AE06_PIG	742729		-5.3	DLEDSLARER	RT: 48.12
iNS7-R2-1_SW_RB5_01_8019	Lamin A/C OS=Sus scrofa OX=9823 GN=LMNA PE=1 SV=1	tr|A0A287AE06|A0A287AE06_PIG	758043		-5.2	DLEDSLARER	RT: 48.12
iNS7-R2-1_SW_RB5_01_8019	Lamin A/C OS=Sus scrofa OX=9823 GN=LMNA PE=1 SV=1	tr|A0A287AE06|A0A287AE06_PIG	137845		-3.7	LLADKER	RT: 31.9
iNS7-R2-1_SW_RB5_01_8019	Lamin A/C OS=Sus scrofa OX=9823 GN=LMNA PE=1 SV=1	tr|A0A287AE06|A0A287AE06_PIG	1034854		-6.2	EREMAEMR	RT: 52.85
iNS7-R2-1_SW_RB5_01_8019	Lamin A/C OS=Sus scrofa OX=9823 GN=LMNA PE=1 SV=1	tr|A0A287AE06|A0A287AE06_PIG	4921		5.4	MQQQLDEYQELLDIK	RT: 114.21
iNS7-R2-1_SW_RB5_01_8019	Lamin A/C OS=Sus scrofa OX=9823 GN=LMNA PE=1 SV=1	tr|A0A287AE06|A0A287AE06_PIG	89547		-5.9	LALDMEIHAYR	RT: 27.8
iNS7-R2-1_SW_RB5_01_8019	Lamin A/C OS=Sus scrofa OX=9823 GN=LMNA PE=1 SV=1	tr|A0A287AE06|A0A287AE06_PIG	1521881		-6.8	LLEGEEER	RT: 52.86
iNS7-R2-1_SW_RB5_01_8019	Lamin A/C OS=Sus scrofa OX=9823 GN=LMNA PE=1 SV=1	tr|A0A287AE06|A0A287AE06_PIG	807728		-8	LLEGEEERLR	RT: 48.12
iNS7-R2-1_SW_RB5_01_8019	Lamin A/C OS=Sus scrofa OX=9823 GN=LMNA PE=1 SV=1	tr|A0A287AE06|A0A287AE06_PIG	799653		-8.1	LLEGEEERLR	RT: 48.12
iNS7-R2-1_SW_RB5_01_8019	Lamin A/C OS=Sus scrofa OX=9823 GN=LMNA PE=1 SV=1	tr|A0A287AE06|A0A287AE06_PIG	218652		-7.1	LRLSPSPTSQR	RT: 32.81
iNS7-R2-1_SW_RB5_01_8019	Lamin A/C OS=Sus scrofa OX=9823 GN=LMNA PE=1 SV=1	tr|A0A287AE06|A0A287AE06_PIG	809590		-3.2	LSPSPTSQR	RT: 17.78
iNS7-R2-1_SW_RB5_01_8019	Lamin A/C OS=Sus scrofa OX=9823 GN=LMNA PE=1 SV=1	tr|A0A287AE06|A0A287AE06_PIG	1431346		-6.6	LSPSPTSQRSR	RT: 52.85
iNS7-R2-1_SW_RB5_01_8019	Lamin A/C OS=Sus scrofa OX=9823 GN=LMNA PE=1 SV=1	tr|A0A287AE06|A0A287AE06_PIG	16682		-2.7	GRASSHSSQTQSGGSVTK	RT: 76.65
iNS7-R2-1_SW_RB5_01_8019	Lamin A/C OS=Sus scrofa OX=9823 GN=LMNA PE=1 SV=1	tr|A0A287AE06|A0A287AE06_PIG	17936		-2.3	ASSHSSQTQSGGSVTKK	RT: 81.37
iNS7-R2-1_SW_RB5_01_8019	Lamin A/C OS=Sus scrofa OX=9823 GN=LMNA PE=1 SV=1	tr|A0A287AE06|A0A287AE06_PIG	46151		2.2	KLESSESR	RT: 18.19
iNS7-R2-1_SW_RB5_01_8019	Lamin A/C OS=Sus scrofa OX=9823 GN=LMNA PE=1 SV=1	tr|A0A287AE06|A0A287AE06_PIG	407873		-6.4	LESSESR	RT: 48.88
iNS7-R2-1_SW_RB5_01_8019	Lamin A/C OS=Sus scrofa OX=9823 GN=LMNA PE=1 SV=1	tr|A0A287AE06|A0A287AE06_PIG	502246		-3.9	SSFSQHAR	RT: 58.06
iNS7-R2-1_SW_RB5_01_8019	Lamin A/C OS=Sus scrofa OX=9823 GN=LMNA PE=1 SV=1	tr|A0A287AE06|A0A287AE06_PIG	439337		-2.8	VAVEEVDEEGKFVR	RT: 65.79
iNS7-R2-1_SW_RB5_01_8019	Lamin A/C OS=Sus scrofa OX=9823 GN=LMNA PE=1 SV=1	tr|A0A287AE06|A0A287AE06_PIG	437152		-2.8	VAVEEVDEEGKFVR	RT: 65.79
iNS7-R2-1_SW_RB5_01_8019	Lamin A/C OS=Sus scrofa OX=9823 GN=LMNA PE=1 SV=1	tr|A0A287AE06|A0A287AE06_PIG	86773		2.8	NKSNEDQSMGNWQIK	RT: 94.37
iNS7-R2-1_SW_RB5_01_8019	Lamin A/C OS=Sus scrofa OX=9823 GN=LMNA PE=1 SV=1	tr|A0A287AE06|A0A287AE06_PIG	781147		-8.1	SNEDQSMGNWQIKR	RT: 48.12
iNS7-R2-1_SW_RB5_01_8019	Lamin A/C OS=Sus scrofa OX=9823 GN=LMNA PE=1 SV=1	tr|A0A287AE06|A0A287AE06_PIG	789241		-8	SNEDQSMGNWQIKR	RT: 48.12
iNS7-R2-1_SW_RB5_01_8019	Lamin A/C OS=Sus scrofa OX=9823 GN=LMNA PE=1 SV=1	tr|A0A287AE06|A0A287AE06_PIG	12559		-0.6	FPPKFTLK	RT: 27.24
iNS7-R2-1_SW_RB5_01_8019	Lamin A/C OS=Sus scrofa OX=9823 GN=LMNA PE=1 SV=1	tr|A0A287AE06|A0A287AE06_PIG	734673		-7.5	SQNTWGCGNSLR	RT: 48.39
iNS7-R2-1_SW_RB5_01_8019	Lamin A/C OS=Sus scrofa OX=9823 GN=LMNA PE=1 SV=1	tr|A0A287AE06|A0A287AE06_PIG	65968		-5.4	TALINSTGEEVAMR	RT: 73.5
iNS7-R2-1_SW_RB5_01_8019	Lamin A/C OS=Sus scrofa OX=9823 GN=LMNA PE=1 SV=1	tr|A0A287AE06|A0A287AE06_PIG	649078		-5.9	TALINSTGEEVAMR	RT: 53.06
iNS7-R2-1_SW_RB5_01_8019	Lamin A/C OS=Sus scrofa OX=9823 GN=LMNA PE=1 SV=1	tr|A0A287AE06|A0A287AE06_PIG	87875		-3.7	TVLCGTCGQPADK	RT: 38.58
iNS7-R2-1_SW_RB5_01_8019	Lamin A/C OS=Sus scrofa OX=9823 GN=LMNA PE=1 SV=1	tr|A0A287AE06|A0A287AE06_PIG	204953		-2.3	TVLCGTCGQPADKASASSSGAQVGGSISSGSSASSVTVTR	RT: 77.62
iNS7-R2-1_SW_RB5_01_8019	Lamin A/C OS=Sus scrofa OX=9823 GN=LMNA PE=1 SV=1	tr|A0A287AE06|A0A287AE06_PIG	23256		6.7	ASASSSGAQVGGSISSGSSASSVTVTR	RT: 69
iNS7-R2-1_SW_RB5_01_8019	Lamin A/C OS=Sus scrofa OX=9823 GN=LMNA PE=1 SV=1	tr|A0A287AE06|A0A287AE06_PIG	332614		-4.7	SYRSVGGSGGGSFGDNLVTR	RT: 60.92
iNS7-R2-1_SW_RB5_01_8019	Lamin A/C OS=Sus scrofa OX=9823 GN=LMNA PE=1 SV=1	tr|A0A287AE06|A0A287AE06_PIG	324691		-4.7	SYRSVGGSGGGSFGDNLVTR	RT: 60.92
iNS7-R2-1_SW_RB5_01_8019	Lamin A/C OS=Sus scrofa OX=9823 GN=LMNA PE=1 SV=1	tr|A0A287AE06|A0A287AE06_PIG	108680		-4.9	SVGGSGGGSFGDNLVTR	RT: 70.86
iNS7-R2-1_SW_RB5_01_8019	Lamin A/C OS=Sus scrofa OX=9823 GN=LMNA PE=1 SV=1	tr|A0A287AE06|A0A287AE06_PIG	23522		-4.4	SVGGSGGGSFGDNLVTR	RT: 70.86
iNS7-R2-1_SW_RB5_01_8019	Lamin A/C OS=Sus scrofa OX=9823 GN=LMNA PE=1 SV=1	tr|A0A287AE06|A0A287AE06_PIG	605739		-6.5	SVGGSGGGSFGDNLVTRSYLLGNSRPR	RT: 53.06
iNS7-R2-1_SW_RB5_01_8019	Lamin A/C OS=Sus scrofa OX=9823 GN=LMNA PE=1 SV=1	tr|A0A287AE06|A0A287AE06_PIG	729847		-8	SYLLGNSRPR	RT: 48.11
iNS7-R2-1_SW_RB5_01_8019	Lamin A/C OS=Sus scrofa OX=9823 GN=LMNA PE=1 SV=1	tr|A0A287AE06|A0A287AE06_PIG	82574		-1.6	TQSPQNCSIM	RT: 48.53
iNS7-R3-1_SW_RC5_01_8031	Lamin A/C OS=Sus scrofa OX=9823 GN=LMNA PE=1 SV=1	tr|A0A287AE06|A0A287AE06_PIG	88274		-5	METPSQR	RT: 29.67
iNS7-R3-1_SW_RC5_01_8031	Lamin A/C OS=Sus scrofa OX=9823 GN=LMNA PE=1 SV=1	tr|A0A287AE06|A0A287AE06_PIG	93917		-5.3	ATRSGAQASSTPLSPTR	RT: 29.67
iNS7-R3-1_SW_RC5_01_8031	Lamin A/C OS=Sus scrofa OX=9823 GN=LMNA PE=1 SV=1	tr|A0A287AE06|A0A287AE06_PIG	129276		2.9	SGAQASSTPLSPTR	RT: 57.28
iNS7-R3-1_SW_RC5_01_8031	Lamin A/C OS=Sus scrofa OX=9823 GN=LMNA PE=1 SV=1	tr|A0A287AE06|A0A287AE06_PIG	96520		0.2	SGAQASSTPLSPTR	RT: 57.28
iNS7-R3-1_SW_RC5_01_8031	Lamin A/C OS=Sus scrofa OX=9823 GN=LMNA PE=1 SV=1	tr|A0A287AE06|A0A287AE06_PIG	56981		-2.5	SGAQASSTPLSPTRITR	RT: 49.29
iNS7-R3-1_SW_RC5_01_8031	Lamin A/C OS=Sus scrofa OX=9823 GN=LMNA PE=1 SV=1	tr|A0A287AE06|A0A287AE06_PIG	78812		1.3	LQEKEDLQELNDR	RT: 51.03
iNS7-R3-1_SW_RC5_01_8031	Lamin A/C OS=Sus scrofa OX=9823 GN=LMNA PE=1 SV=1	tr|A0A287AE06|A0A287AE06_PIG	39539		-4.8	LAVYIDR	RT: 62.86
iNS7-R3-1_SW_RC5_01_8031	Lamin A/C OS=Sus scrofa OX=9823 GN=LMNA PE=1 SV=1	tr|A0A287AE06|A0A287AE06_PIG	84987		3.6	SLETENAGLR	RT: 41.08
iNS7-R3-1_SW_RC5_01_8031	Lamin A/C OS=Sus scrofa OX=9823 GN=LMNA PE=1 SV=1	tr|A0A287AE06|A0A287AE06_PIG	626981		-2.3	SLETENAGLRLR	RT: 56.24
iNS7-R3-1_SW_RC5_01_8031	Lamin A/C OS=Sus scrofa OX=9823 GN=LMNA PE=1 SV=1	tr|A0A287AE06|A0A287AE06_PIG	1254		1.5	SLETENAGLRLR	RT: 56.24
iNS7-R3-1_SW_RC5_01_8031	Lamin A/C OS=Sus scrofa OX=9823 GN=LMNA PE=1 SV=1	tr|A0A287AE06|A0A287AE06_PIG	19532		-3.9	ITESEEVVSR	RT: 38.93
iNS7-R3-1_SW_RC5_01_8031	Lamin A/C OS=Sus scrofa OX=9823 GN=LMNA PE=1 SV=1	tr|A0A287AE06|A0A287AE06_PIG	14136		-1.6	EVSGIKSAYEAELGDAR	RT: 44.69
iNS7-R3-1_SW_RC5_01_8031	Lamin A/C OS=Sus scrofa OX=9823 GN=LMNA PE=1 SV=1	tr|A0A287AE06|A0A287AE06_PIG	87913		-4.4	EVSGIKSAYEAELGDAR	RT: 44.69
iNS7-R3-1_SW_RC5_01_8031	Lamin A/C OS=Sus scrofa OX=9823 GN=LMNA PE=1 SV=1	tr|A0A287AE06|A0A287AE06_PIG	77653		-4.7	EVSGIKSAYEAELGDAR	RT: 44.69
iNS7-R3-1_SW_RC5_01_8031	Lamin A/C OS=Sus scrofa OX=9823 GN=LMNA PE=1 SV=1	tr|A0A287AE06|A0A287AE06_PIG	67735		1.5	SAYEAELGDAR	RT: 58.26
iNS7-R3-1_SW_RC5_01_8031	Lamin A/C OS=Sus scrofa OX=9823 GN=LMNA PE=1 SV=1	tr|A0A287AE06|A0A287AE06_PIG	70262		-7.7	SAYEAELGDARK	RT: 59.93
iNS7-R3-1_SW_RC5_01_8031	Lamin A/C OS=Sus scrofa OX=9823 GN=LMNA PE=1 SV=1	tr|A0A287AE06|A0A287AE06_PIG	16074		-0.7	KTLDSVAK	RT: 27.09
iNS7-R3-1_SW_RC5_01_8031	Lamin A/C OS=Sus scrofa OX=9823 GN=LMNA PE=1 SV=1	tr|A0A287AE06|A0A287AE06_PIG	49039		-5	TLDSVAKER	RT: 33.63
iNS7-R3-1_SW_RC5_01_8031	Lamin A/C OS=Sus scrofa OX=9823 GN=LMNA PE=1 SV=1	tr|A0A287AE06|A0A287AE06_PIG	230793		-0.4	KEGDLMAAQAR	RT: 58.22
iNS7-R3-1_SW_RC5_01_8031	Lamin A/C OS=Sus scrofa OX=9823 GN=LMNA PE=1 SV=1	tr|A0A287AE06|A0A287AE06_PIG	17100		-4.8	KEGDLMAAQAR	RT: 56.1
iNS7-R3-1_SW_RC5_01_8031	Lamin A/C OS=Sus scrofa OX=9823 GN=LMNA PE=1 SV=1	tr|A0A287AE06|A0A287AE06_PIG	328776		3.6	KEGDLMAAQAR	RT: 56.1
iNS7-R3-1_SW_RC5_01_8031	Lamin A/C OS=Sus scrofa OX=9823 GN=LMNA PE=1 SV=1	tr|A0A287AE06|A0A287AE06_PIG	113107		-5	EGDLMAAQAR	RT: 58.2
iNS7-R3-1_SW_RC5_01_8031	Lamin A/C OS=Sus scrofa OX=9823 GN=LMNA PE=1 SV=1	tr|A0A287AE06|A0A287AE06_PIG	58254		-3	EGDLMAAQARLK	RT: 68.49
iNS7-R3-1_SW_RC5_01_8031	Lamin A/C OS=Sus scrofa OX=9823 GN=LMNA PE=1 SV=1	tr|A0A287AE06|A0A287AE06_PIG	11305		-2.9	EGDLMAAQARLK	RT: 68.49
iNS7-R3-1_SW_RC5_01_8031	Lamin A/C OS=Sus scrofa OX=9823 GN=LMNA PE=1 SV=1	tr|A0A287AE06|A0A287AE06_PIG	298946		6.3	LKDLEALLNSK	RT: 69.05
iNS7-R3-1_SW_RC5_01_8031	Lamin A/C OS=Sus scrofa OX=9823 GN=LMNA PE=1 SV=1	tr|A0A287AE06|A0A287AE06_PIG	139042		-4.1	DLEALLNSKEAALSTALSEK	RT: 84.27
iNS7-R3-1_SW_RC5_01_8031	Lamin A/C OS=Sus scrofa OX=9823 GN=LMNA PE=1 SV=1	tr|A0A287AE06|A0A287AE06_PIG	79325		1.5	EAALSTALSEK	RT: 57.63
iNS7-R3-1_SW_RC5_01_8031	Lamin A/C OS=Sus scrofa OX=9823 GN=LMNA PE=1 SV=1	tr|A0A287AE06|A0A287AE06_PIG	53865		-5	RTLEGELHDLR	RT: 70.66
iNS7-R3-1_SW_RC5_01_8031	Lamin A/C OS=Sus scrofa OX=9823 GN=LMNA PE=1 SV=1	tr|A0A287AE06|A0A287AE06_PIG	30172		-3.5	GQVAKLEAALGEAK	RT: 185.98
iNS7-R3-1_SW_RC5_01_8031	Lamin A/C OS=Sus scrofa OX=9823 GN=LMNA PE=1 SV=1	tr|A0A287AE06|A0A287AE06_PIG	135356		3.8	LEAALGEAK	RT: 54.36
iNS7-R3-1_SW_RC5_01_8031	Lamin A/C OS=Sus scrofa OX=9823 GN=LMNA PE=1 SV=1	tr|A0A287AE06|A0A287AE06_PIG	35777		-1	LEAALGEAKK	RT: 40.73
iNS7-R3-1_SW_RC5_01_8031	Lamin A/C OS=Sus scrofa OX=9823 GN=LMNA PE=1 SV=1	tr|A0A287AE06|A0A287AE06_PIG	55195		-6.3	QLQDEMLRR	RT: 25.28
iNS7-R3-1_SW_RC5_01_8031	Lamin A/C OS=Sus scrofa OX=9823 GN=LMNA PE=1 SV=1	tr|A0A287AE06|A0A287AE06_PIG	85234		-2	RVDAENR	RT: 27.23
iNS7-R3-1_SW_RC5_01_8031	Lamin A/C OS=Sus scrofa OX=9823 GN=LMNA PE=1 SV=1	tr|A0A287AE06|A0A287AE06_PIG	48013		-4.7	NIYSEELR	RT: 52.42
iNS7-R3-1_SW_RC5_01_8031	Lamin A/C OS=Sus scrofa OX=9823 GN=LMNA PE=1 SV=1	tr|A0A287AE06|A0A287AE06_PIG	66899		-4.9	LADALQELR	RT: 64.18
iNS7-R3-1_SW_RC5_01_8031	Lamin A/C OS=Sus scrofa OX=9823 GN=LMNA PE=1 SV=1	tr|A0A287AE06|A0A287AE06_PIG	29089		-8.2	ELEKTYSAK	RT: 105.96
iNS7-R3-1_SW_RC5_01_8031	Lamin A/C OS=Sus scrofa OX=9823 GN=LMNA PE=1 SV=1	tr|A0A287AE06|A0A287AE06_PIG	252054		-0.5	TYSAKLDNAR	RT: 35.66
iNS7-R3-1_SW_RC5_01_8031	Lamin A/C OS=Sus scrofa OX=9823 GN=LMNA PE=1 SV=1	tr|A0A287AE06|A0A287AE06_PIG	18601		4.3	QSAERNSNLVGAAHEELQQSR	RT: 51.93
iNS7-R3-1_SW_RC5_01_8031	Lamin A/C OS=Sus scrofa OX=9823 GN=LMNA PE=1 SV=1	tr|A0A287AE06|A0A287AE06_PIG	132088		2.3	NSNLVGAAHEELQQSR	RT: 55.13
iNS7-R3-1_SW_RC5_01_8031	Lamin A/C OS=Sus scrofa OX=9823 GN=LMNA PE=1 SV=1	tr|A0A287AE06|A0A287AE06_PIG	54929		-1.1	NSNLVGAAHEELQQSR	RT: 55.13
iNS7-R3-1_SW_RC5_01_8031	Lamin A/C OS=Sus scrofa OX=9823 GN=LMNA PE=1 SV=1	tr|A0A287AE06|A0A287AE06_PIG	64087		5.2	IRIDSLSAQLSQLQK	RT: 88.08
iNS7-R3-1_SW_RC5_01_8031	Lamin A/C OS=Sus scrofa OX=9823 GN=LMNA PE=1 SV=1	tr|A0A287AE06|A0A287AE06_PIG	113050		-1.6	IDSLSAQLSQLQK	RT: 66.67
iNS7-R3-1_SW_RC5_01_8031	Lamin A/C OS=Sus scrofa OX=9823 GN=LMNA PE=1 SV=1	tr|A0A287AE06|A0A287AE06_PIG	60116		0.5	QLAAKEAK	RT: 39.27
iNS7-R3-1_SW_RC5_01_8031	Lamin A/C OS=Sus scrofa OX=9823 GN=LMNA PE=1 SV=1	tr|A0A287AE06|A0A287AE06_PIG	88122		-4.5	DLEDSLAR	RT: 47.07
iNS7-R3-1_SW_RC5_01_8031	Lamin A/C OS=Sus scrofa OX=9823 GN=LMNA PE=1 SV=1	tr|A0A287AE06|A0A287AE06_PIG	154717		-5.4	DLEDSLARER	RT: 37.95
iNS7-R3-1_SW_RC5_01_8031	Lamin A/C OS=Sus scrofa OX=9823 GN=LMNA PE=1 SV=1	tr|A0A287AE06|A0A287AE06_PIG	208392		-2.4	DLEDSLARER	RT: 37.95
iNS7-R3-1_SW_RC5_01_8031	Lamin A/C OS=Sus scrofa OX=9823 GN=LMNA PE=1 SV=1	tr|A0A287AE06|A0A287AE06_PIG	81738		-3.1	LLADKER	RT: 27.23
iNS7-R3-1_SW_RC5_01_8031	Lamin A/C OS=Sus scrofa OX=9823 GN=LMNA PE=1 SV=1	tr|A0A287AE06|A0A287AE06_PIG	91067		-4.2	EREMAEMR	RT: 52.84
iNS7-R3-1_SW_RC5_01_8031	Lamin A/C OS=Sus scrofa OX=9823 GN=LMNA PE=1 SV=1	tr|A0A287AE06|A0A287AE06_PIG	15124		2.2	MQQQLDEYQELLDIK	RT: 113.54
iNS7-R3-1_SW_RC5_01_8031	Lamin A/C OS=Sus scrofa OX=9823 GN=LMNA PE=1 SV=1	tr|A0A287AE06|A0A287AE06_PIG	32585		0.3	LALDMEIHAYR	RT: 24.17
iNS7-R3-1_SW_RC5_01_8031	Lamin A/C OS=Sus scrofa OX=9823 GN=LMNA PE=1 SV=1	tr|A0A287AE06|A0A287AE06_PIG	1096224		5	LLEGEEER	RT: 35.61
iNS7-R3-1_SW_RC5_01_8031	Lamin A/C OS=Sus scrofa OX=9823 GN=LMNA PE=1 SV=1	tr|A0A287AE06|A0A287AE06_PIG	75525		-2.6	LLEGEEERLR	RT: 27.23
iNS7-R3-1_SW_RC5_01_8031	Lamin A/C OS=Sus scrofa OX=9823 GN=LMNA PE=1 SV=1	tr|A0A287AE06|A0A287AE06_PIG	67393		-2.1	LLEGEEERLR	RT: 27.23
iNS7-R3-1_SW_RC5_01_8031	Lamin A/C OS=Sus scrofa OX=9823 GN=LMNA PE=1 SV=1	tr|A0A287AE06|A0A287AE06_PIG	78508		-5	LRLSPSPTSQR	RT: 33.78
iNS7-R3-1_SW_RC5_01_8031	Lamin A/C OS=Sus scrofa OX=9823 GN=LMNA PE=1 SV=1	tr|A0A287AE06|A0A287AE06_PIG	90839		-5.1	LSPSPTSQR	RT: 29.67
iNS7-R3-1_SW_RC5_01_8031	Lamin A/C OS=Sus scrofa OX=9823 GN=LMNA PE=1 SV=1	tr|A0A287AE06|A0A287AE06_PIG	83182		-1.7	LSPSPTSQRSR	RT: 47.69
iNS7-R3-1_SW_RC5_01_8031	Lamin A/C OS=Sus scrofa OX=9823 GN=LMNA PE=1 SV=1	tr|A0A287AE06|A0A287AE06_PIG	12464		1.5	GRASSHSSQTQSGGSVTK	RT: 75.85
iNS7-R3-1_SW_RC5_01_8031	Lamin A/C OS=Sus scrofa OX=9823 GN=LMNA PE=1 SV=1	tr|A0A287AE06|A0A287AE06_PIG	19969		-3.9	ASSHSSQTQSGGSVTKK	RT: 77.31
iNS7-R3-1_SW_RC5_01_8031	Lamin A/C OS=Sus scrofa OX=9823 GN=LMNA PE=1 SV=1	tr|A0A287AE06|A0A287AE06_PIG	34542		-1.9	KLESSESR	RT: 22.92
iNS7-R3-1_SW_RC5_01_8031	Lamin A/C OS=Sus scrofa OX=9823 GN=LMNA PE=1 SV=1	tr|A0A287AE06|A0A287AE06_PIG	64904		-0.5	LESSESR	RT: 50.61
iNS7-R3-1_SW_RC5_01_8031	Lamin A/C OS=Sus scrofa OX=9823 GN=LMNA PE=1 SV=1	tr|A0A287AE06|A0A287AE06_PIG	73948		0.1	SSFSQHAR	RT: 57.56
iNS7-R3-1_SW_RC5_01_8031	Lamin A/C OS=Sus scrofa OX=9823 GN=LMNA PE=1 SV=1	tr|A0A287AE06|A0A287AE06_PIG	147193		-4	VAVEEVDEEGKFVR	RT: 65.97
iNS7-R3-1_SW_RC5_01_8031	Lamin A/C OS=Sus scrofa OX=9823 GN=LMNA PE=1 SV=1	tr|A0A287AE06|A0A287AE06_PIG	1672		-0.6	VAVEEVDEEGKFVR	RT: 65.97
iNS7-R3-1_SW_RC5_01_8031	Lamin A/C OS=Sus scrofa OX=9823 GN=LMNA PE=1 SV=1	tr|A0A287AE06|A0A287AE06_PIG	267273		-4.5	NKSNEDQSMGNWQIK	RT: 94.49
iNS7-R3-1_SW_RC5_01_8031	Lamin A/C OS=Sus scrofa OX=9823 GN=LMNA PE=1 SV=1	tr|A0A287AE06|A0A287AE06_PIG	151753		-3.8	SNEDQSMGNWQIKR	RT: 58.2
iNS7-R3-1_SW_RC5_01_8031	Lamin A/C OS=Sus scrofa OX=9823 GN=LMNA PE=1 SV=1	tr|A0A287AE06|A0A287AE06_PIG	98591		-6.2	SNEDQSMGNWQIKR	RT: 58.2
iNS7-R3-1_SW_RC5_01_8031	Lamin A/C OS=Sus scrofa OX=9823 GN=LMNA PE=1 SV=1	tr|A0A287AE06|A0A287AE06_PIG	10374		-0.6	FPPKFTLK	RT: 26.88
iNS7-R3-1_SW_RC5_01_8031	Lamin A/C OS=Sus scrofa OX=9823 GN=LMNA PE=1 SV=1	tr|A0A287AE06|A0A287AE06_PIG	112119		-0.9	SQNTWGCGNSLR	RT: 49.29
iNS7-R3-1_SW_RC5_01_8031	Lamin A/C OS=Sus scrofa OX=9823 GN=LMNA PE=1 SV=1	tr|A0A287AE06|A0A287AE06_PIG	25270		-3.7	TALINSTGEEVAMR	RT: 78.49
iNS7-R3-1_SW_RC5_01_8031	Lamin A/C OS=Sus scrofa OX=9823 GN=LMNA PE=1 SV=1	tr|A0A287AE06|A0A287AE06_PIG	404909		-5.9	TALINSTGEEVAMR	RT: 58.2
iNS7-R3-1_SW_RC5_01_8031	Lamin A/C OS=Sus scrofa OX=9823 GN=LMNA PE=1 SV=1	tr|A0A287AE06|A0A287AE06_PIG	88863		2	TVLCGTCGQPADK	RT: 37.95
iNS7-R3-1_SW_RC5_01_8031	Lamin A/C OS=Sus scrofa OX=9823 GN=LMNA PE=1 SV=1	tr|A0A287AE06|A0A287AE06_PIG	78204		-3.9	TVLCGTCGQPADKASASSSGAQVGGSISSGSSASSVTVTR	RT: 75.3
iNS7-R3-1_SW_RC5_01_8031	Lamin A/C OS=Sus scrofa OX=9823 GN=LMNA PE=1 SV=1	tr|A0A287AE06|A0A287AE06_PIG	21375		5.3	ASASSSGAQVGGSISSGSSASSVTVTR	RT: 69.4
iNS7-R3-1_SW_RC5_01_8031	Lamin A/C OS=Sus scrofa OX=9823 GN=LMNA PE=1 SV=1	tr|A0A287AE06|A0A287AE06_PIG	62928		-6.6	SYRSVGGSGGGSFGDNLVTR	RT: 64.18
iNS7-R3-1_SW_RC5_01_8031	Lamin A/C OS=Sus scrofa OX=9823 GN=LMNA PE=1 SV=1	tr|A0A287AE06|A0A287AE06_PIG	63764		-6.5	SYRSVGGSGGGSFGDNLVTR	RT: 64.18
iNS7-R3-1_SW_RC5_01_8031	Lamin A/C OS=Sus scrofa OX=9823 GN=LMNA PE=1 SV=1	tr|A0A287AE06|A0A287AE06_PIG	116736		3.3	SVGGSGGGSFGDNLVTR	RT: 68.41
iNS7-R3-1_SW_RC5_01_8031	Lamin A/C OS=Sus scrofa OX=9823 GN=LMNA PE=1 SV=1	tr|A0A287AE06|A0A287AE06_PIG	3572		4.1	SVGGSGGGSFGDNLVTR	RT: 68.41
iNS7-R3-1_SW_RC5_01_8031	Lamin A/C OS=Sus scrofa OX=9823 GN=LMNA PE=1 SV=1	tr|A0A287AE06|A0A287AE06_PIG	112252		-2.3	SVGGSGGGSFGDNLVTRSYLLGNSRPR	RT: 29.67
iNS7-R3-1_SW_RC5_01_8031	Lamin A/C OS=Sus scrofa OX=9823 GN=LMNA PE=1 SV=1	tr|A0A287AE06|A0A287AE06_PIG	84683		-4.8	SYLLGNSRPR	RT: 33.78
iNS7-R3-1_SW_RC5_01_8031	Lamin A/C OS=Sus scrofa OX=9823 GN=LMNA PE=1 SV=1	tr|A0A287AE06|A0A287AE06_PIG	51965		0.2	TQSPQNCSIM	RT: 52.64
PEF-R1-1_SW_RA7_01_8012	Lamin A/C OS=Sus scrofa OX=9823 GN=LMNA PE=1 SV=1	tr|A0A287AE06|A0A287AE06_PIG	166326		-6.8	METPSQR	RT: 33.01
PEF-R1-1_SW_RA7_01_8012	Lamin A/C OS=Sus scrofa OX=9823 GN=LMNA PE=1 SV=1	tr|A0A287AE06|A0A287AE06_PIG	77843		-1.8	ATRSGAQASSTPLSPTR	RT: 29.81
PEF-R1-1_SW_RA7_01_8012	Lamin A/C OS=Sus scrofa OX=9823 GN=LMNA PE=1 SV=1	tr|A0A287AE06|A0A287AE06_PIG	3287		-6.2	SGAQASSTPLSPTR	RT: 44.9
PEF-R1-1_SW_RA7_01_8012	Lamin A/C OS=Sus scrofa OX=9823 GN=LMNA PE=1 SV=1	tr|A0A287AE06|A0A287AE06_PIG	312379		-7.7	SGAQASSTPLSPTR	RT: 44.9
PEF-R1-1_SW_RA7_01_8012	Lamin A/C OS=Sus scrofa OX=9823 GN=LMNA PE=1 SV=1	tr|A0A287AE06|A0A287AE06_PIG	43909		-0.3	SGAQASSTPLSPTRITR	RT: 49.79
PEF-R1-1_SW_RA7_01_8012	Lamin A/C OS=Sus scrofa OX=9823 GN=LMNA PE=1 SV=1	tr|A0A287AE06|A0A287AE06_PIG	153083		-5.6	LQEKEDLQELNDR	RT: 50.13
PEF-R1-1_SW_RA7_01_8012	Lamin A/C OS=Sus scrofa OX=9823 GN=LMNA PE=1 SV=1	tr|A0A287AE06|A0A287AE06_PIG	513855		-8.4	LAVYIDR	RT: 64.03
PEF-R1-1_SW_RA7_01_8012	Lamin A/C OS=Sus scrofa OX=9823 GN=LMNA PE=1 SV=1	tr|A0A287AE06|A0A287AE06_PIG	329403		-7.5	SLETENAGLR	RT: 44.91
PEF-R1-1_SW_RA7_01_8012	Lamin A/C OS=Sus scrofa OX=9823 GN=LMNA PE=1 SV=1	tr|A0A287AE06|A0A287AE06_PIG	242744		-5.9	SLETENAGLRLR	RT: 61.94
PEF-R1-1_SW_RA7_01_8012	Lamin A/C OS=Sus scrofa OX=9823 GN=LMNA PE=1 SV=1	tr|A0A287AE06|A0A287AE06_PIG	212534		-6.9	SLETENAGLRLR	RT: 61.94
PEF-R1-1_SW_RA7_01_8012	Lamin A/C OS=Sus scrofa OX=9823 GN=LMNA PE=1 SV=1	tr|A0A287AE06|A0A287AE06_PIG	26467		-2.7	ITESEEVVSR	RT: 41.99
PEF-R1-1_SW_RA7_01_8012	Lamin A/C OS=Sus scrofa OX=9823 GN=LMNA PE=1 SV=1	tr|A0A287AE06|A0A287AE06_PIG	59356		-1.8	EVSGIKSAYEAELGDAR	RT: 44.49
PEF-R1-1_SW_RA7_01_8012	Lamin A/C OS=Sus scrofa OX=9823 GN=LMNA PE=1 SV=1	tr|A0A287AE06|A0A287AE06_PIG	51794		-2.8	EVSGIKSAYEAELGDAR	RT: 44.49
PEF-R1-1_SW_RA7_01_8012	Lamin A/C OS=Sus scrofa OX=9823 GN=LMNA PE=1 SV=1	tr|A0A287AE06|A0A287AE06_PIG	42142		-2.1	EVSGIKSAYEAELGDAR	RT: 44.49
PEF-R1-1_SW_RA7_01_8012	Lamin A/C OS=Sus scrofa OX=9823 GN=LMNA PE=1 SV=1	tr|A0A287AE06|A0A287AE06_PIG	233624		-7.8	SAYEAELGDAR	RT: 61.32
PEF-R1-1_SW_RA7_01_8012	Lamin A/C OS=Sus scrofa OX=9823 GN=LMNA PE=1 SV=1	tr|A0A287AE06|A0A287AE06_PIG	29032		-5.3	SAYEAELGDARK	RT: 59.32
PEF-R1-1_SW_RA7_01_8012	Lamin A/C OS=Sus scrofa OX=9823 GN=LMNA PE=1 SV=1	tr|A0A287AE06|A0A287AE06_PIG	5871		2	KTLDSVAK	RT: 25.15
PEF-R1-1_SW_RA7_01_8012	Lamin A/C OS=Sus scrofa OX=9823 GN=LMNA PE=1 SV=1	tr|A0A287AE06|A0A287AE06_PIG	146604		-7.6	TLDSVAKER	RT: 33.01
PEF-R1-1_SW_RA7_01_8012	Lamin A/C OS=Sus scrofa OX=9823 GN=LMNA PE=1 SV=1	tr|A0A287AE06|A0A287AE06_PIG	338561		-7	KEGDLMAAQAR	RT: 44.91
PEF-R1-1_SW_RA7_01_8012	Lamin A/C OS=Sus scrofa OX=9823 GN=LMNA PE=1 SV=1	tr|A0A287AE06|A0A287AE06_PIG	97641		-7.5	KEGDLMAAQAR	RT: 56.4
PEF-R1-1_SW_RA7_01_8012	Lamin A/C OS=Sus scrofa OX=9823 GN=LMNA PE=1 SV=1	tr|A0A287AE06|A0A287AE06_PIG	118921		-5.6	KEGDLMAAQAR	RT: 56.4
PEF-R1-1_SW_RA7_01_8012	Lamin A/C OS=Sus scrofa OX=9823 GN=LMNA PE=1 SV=1	tr|A0A287AE06|A0A287AE06_PIG	340423		-3.8	EGDLMAAQAR	RT: 47.62
PEF-R1-1_SW_RA7_01_8012	Lamin A/C OS=Sus scrofa OX=9823 GN=LMNA PE=1 SV=1	tr|A0A287AE06|A0A287AE06_PIG	30571		-1.4	EGDLMAAQARLK	RT: 68.07
PEF-R1-1_SW_RA7_01_8012	Lamin A/C OS=Sus scrofa OX=9823 GN=LMNA PE=1 SV=1	tr|A0A287AE06|A0A287AE06_PIG	13015		-5.2	EGDLMAAQARLK	RT: 68.07
PEF-R1-1_SW_RA7_01_8012	Lamin A/C OS=Sus scrofa OX=9823 GN=LMNA PE=1 SV=1	tr|A0A287AE06|A0A287AE06_PIG	45505		6.6	LKDLEALLNSK	RT: 68.57
PEF-R1-1_SW_RA7_01_8012	Lamin A/C OS=Sus scrofa OX=9823 GN=LMNA PE=1 SV=1	tr|A0A287AE06|A0A287AE06_PIG	106096		-1	DLEALLNSKEAALSTALSEK	RT: 85.73
PEF-R1-1_SW_RA7_01_8012	Lamin A/C OS=Sus scrofa OX=9823 GN=LMNA PE=1 SV=1	tr|A0A287AE06|A0A287AE06_PIG	138320		1.5	EAALSTALSEK	RT: 55.96
PEF-R1-1_SW_RA7_01_8012	Lamin A/C OS=Sus scrofa OX=9823 GN=LMNA PE=1 SV=1	tr|A0A287AE06|A0A287AE06_PIG	163837		-6.7	RTLEGELHDLR	RT: 74.81
PEF-R1-1_SW_RA7_01_8012	Lamin A/C OS=Sus scrofa OX=9823 GN=LMNA PE=1 SV=1	tr|A0A287AE06|A0A287AE06_PIG	31711		0	GQVAKLEAALGEAK	RT: 180.73
PEF-R1-1_SW_RA7_01_8012	Lamin A/C OS=Sus scrofa OX=9823 GN=LMNA PE=1 SV=1	tr|A0A287AE06|A0A287AE06_PIG	136762		-5	LEAALGEAK	RT: 45.53
PEF-R1-1_SW_RA7_01_8012	Lamin A/C OS=Sus scrofa OX=9823 GN=LMNA PE=1 SV=1	tr|A0A287AE06|A0A287AE06_PIG	39862		-1.1	LEAALGEAKK	RT: 44.63
PEF-R1-1_SW_RA7_01_8012	Lamin A/C OS=Sus scrofa OX=9823 GN=LMNA PE=1 SV=1	tr|A0A287AE06|A0A287AE06_PIG	79553		-4.2	QLQDEMLRR	RT: 17.85
PEF-R1-1_SW_RA7_01_8012	Lamin A/C OS=Sus scrofa OX=9823 GN=LMNA PE=1 SV=1	tr|A0A287AE06|A0A287AE06_PIG	274588		-4.1	RVDAENR	RT: 43.72
PEF-R1-1_SW_RA7_01_8012	Lamin A/C OS=Sus scrofa OX=9823 GN=LMNA PE=1 SV=1	tr|A0A287AE06|A0A287AE06_PIG	153216		-6	NIYSEELR	RT: 50.97
PEF-R1-1_SW_RA7_01_8012	Lamin A/C OS=Sus scrofa OX=9823 GN=LMNA PE=1 SV=1	tr|A0A287AE06|A0A287AE06_PIG	380855		-7.1	LADALQELR	RT: 70.43
PEF-R1-1_SW_RA7_01_8012	Lamin A/C OS=Sus scrofa OX=9823 GN=LMNA PE=1 SV=1	tr|A0A287AE06|A0A287AE06_PIG	355338		1.7	ELEKTYSAK	RT: 108.68
PEF-R1-1_SW_RA7_01_8012	Lamin A/C OS=Sus scrofa OX=9823 GN=LMNA PE=1 SV=1	tr|A0A287AE06|A0A287AE06_PIG	172900		-5	TYSAKLDNAR	RT: 38.72
PEF-R1-1_SW_RA7_01_8012	Lamin A/C OS=Sus scrofa OX=9823 GN=LMNA PE=1 SV=1	tr|A0A287AE06|A0A287AE06_PIG	20292		-2.4	QSAERNSNLVGAAHEELQQSR	RT: 49.98
PEF-R1-1_SW_RA7_01_8012	Lamin A/C OS=Sus scrofa OX=9823 GN=LMNA PE=1 SV=1	tr|A0A287AE06|A0A287AE06_PIG	130967		-4.5	NSNLVGAAHEELQQSR	RT: 54.92
PEF-R1-1_SW_RA7_01_8012	Lamin A/C OS=Sus scrofa OX=9823 GN=LMNA PE=1 SV=1	tr|A0A287AE06|A0A287AE06_PIG	9348		7.7	NSNLVGAAHEELQQSR	RT: 54.92
PEF-R1-1_SW_RA7_01_8012	Lamin A/C OS=Sus scrofa OX=9823 GN=LMNA PE=1 SV=1	tr|A0A287AE06|A0A287AE06_PIG	38114		-1.5	IRIDSLSAQLSQLQK	RT: 90.4
PEF-R1-1_SW_RA7_01_8012	Lamin A/C OS=Sus scrofa OX=9823 GN=LMNA PE=1 SV=1	tr|A0A287AE06|A0A287AE06_PIG	79819		6.8	IDSLSAQLSQLQK	RT: 67.02
PEF-R1-1_SW_RA7_01_8012	Lamin A/C OS=Sus scrofa OX=9823 GN=LMNA PE=1 SV=1	tr|A0A287AE06|A0A287AE06_PIG	31179		-2.8	QLAAKEAK	RT: 40.11
PEF-R1-1_SW_RA7_01_8012	Lamin A/C OS=Sus scrofa OX=9823 GN=LMNA PE=1 SV=1	tr|A0A287AE06|A0A287AE06_PIG	138244		-5	DLEDSLAR	RT: 37.81
PEF-R1-1_SW_RA7_01_8012	Lamin A/C OS=Sus scrofa OX=9823 GN=LMNA PE=1 SV=1	tr|A0A287AE06|A0A287AE06_PIG	600457		1.2	DLEDSLARER	RT: 45.89
PEF-R1-1_SW_RA7_01_8012	Lamin A/C OS=Sus scrofa OX=9823 GN=LMNA PE=1 SV=1	tr|A0A287AE06|A0A287AE06_PIG	181127		5.6	DLEDSLARER	RT: 45.89
PEF-R1-1_SW_RA7_01_8012	Lamin A/C OS=Sus scrofa OX=9823 GN=LMNA PE=1 SV=1	tr|A0A287AE06|A0A287AE06_PIG	87780		-1.5	LLADKER	RT: 29.81
PEF-R1-1_SW_RA7_01_8012	Lamin A/C OS=Sus scrofa OX=9823 GN=LMNA PE=1 SV=1	tr|A0A287AE06|A0A287AE06_PIG	477603		-7.9	EREMAEMR	RT: 64.03
PEF-R1-1_SW_RA7_01_8012	Lamin A/C OS=Sus scrofa OX=9823 GN=LMNA PE=1 SV=1	tr|A0A287AE06|A0A287AE06_PIG	35093		-2	MQQQLDEYQELLDIK	RT: 118.47
PEF-R1-1_SW_RA7_01_8012	Lamin A/C OS=Sus scrofa OX=9823 GN=LMNA PE=1 SV=1	tr|A0A287AE06|A0A287AE06_PIG	58330		-3.5	LALDMEIHAYR	RT: 27.59
PEF-R1-1_SW_RA7_01_8012	Lamin A/C OS=Sus scrofa OX=9823 GN=LMNA PE=1 SV=1	tr|A0A287AE06|A0A287AE06_PIG	240122		-4	LLEGEEER	RT: 43.72
PEF-R1-1_SW_RA7_01_8012	Lamin A/C OS=Sus scrofa OX=9823 GN=LMNA PE=1 SV=1	tr|A0A287AE06|A0A287AE06_PIG	323475		-7.6	LLEGEEERLR	RT: 44.91
PEF-R1-1_SW_RA7_01_8012	Lamin A/C OS=Sus scrofa OX=9823 GN=LMNA PE=1 SV=1	tr|A0A287AE06|A0A287AE06_PIG	332234		-7.3	LLEGEEERLR	RT: 44.91
PEF-R1-1_SW_RA7_01_8012	Lamin A/C OS=Sus scrofa OX=9823 GN=LMNA PE=1 SV=1	tr|A0A287AE06|A0A287AE06_PIG	98287		-4.3	LRLSPSPTSQR	RT: 32.59
PEF-R1-1_SW_RA7_01_8012	Lamin A/C OS=Sus scrofa OX=9823 GN=LMNA PE=1 SV=1	tr|A0A287AE06|A0A287AE06_PIG	356877		-7	LSPSPTSQR	RT: 44.91
PEF-R1-1_SW_RA7_01_8012	Lamin A/C OS=Sus scrofa OX=9823 GN=LMNA PE=1 SV=1	tr|A0A287AE06|A0A287AE06_PIG	368486		-7.6	LSPSPTSQRSR	RT: 44.9
PEF-R1-1_SW_RA7_01_8012	Lamin A/C OS=Sus scrofa OX=9823 GN=LMNA PE=1 SV=1	tr|A0A287AE06|A0A287AE06_PIG	18164		0.4	GRASSHSSQTQSGGSVTK	RT: 73.08
PEF-R1-1_SW_RA7_01_8012	Lamin A/C OS=Sus scrofa OX=9823 GN=LMNA PE=1 SV=1	tr|A0A287AE06|A0A287AE06_PIG	16074		2.4	ASSHSSQTQSGGSVTKK	RT: 76.48
PEF-R1-1_SW_RA7_01_8012	Lamin A/C OS=Sus scrofa OX=9823 GN=LMNA PE=1 SV=1	tr|A0A287AE06|A0A287AE06_PIG	27664		4.3	KLESSESR	RT: 23.41
PEF-R1-1_SW_RA7_01_8012	Lamin A/C OS=Sus scrofa OX=9823 GN=LMNA PE=1 SV=1	tr|A0A287AE06|A0A287AE06_PIG	315970		-2.9	LESSESR	RT: 47.62
PEF-R1-1_SW_RA7_01_8012	Lamin A/C OS=Sus scrofa OX=9823 GN=LMNA PE=1 SV=1	tr|A0A287AE06|A0A287AE06_PIG	271111		-8.1	SSFSQHAR	RT: 49.22
PEF-R1-1_SW_RA7_01_8012	Lamin A/C OS=Sus scrofa OX=9823 GN=LMNA PE=1 SV=1	tr|A0A287AE06|A0A287AE06_PIG	132392		-5	VAVEEVDEEGKFVR	RT: 62.37
PEF-R1-1_SW_RA7_01_8012	Lamin A/C OS=Sus scrofa OX=9823 GN=LMNA PE=1 SV=1	tr|A0A287AE06|A0A287AE06_PIG	150233		-3.8	VAVEEVDEEGKFVR	RT: 62.37
PEF-R1-1_SW_RA7_01_8012	Lamin A/C OS=Sus scrofa OX=9823 GN=LMNA PE=1 SV=1	tr|A0A287AE06|A0A287AE06_PIG	206644		0.4	NKSNEDQSMGNWQIK	RT: 94.57
PEF-R1-1_SW_RA7_01_8012	Lamin A/C OS=Sus scrofa OX=9823 GN=LMNA PE=1 SV=1	tr|A0A287AE06|A0A287AE06_PIG	273277		3.4	SNEDQSMGNWQIKR	RT: 72.04
PEF-R1-1_SW_RA7_01_8012	Lamin A/C OS=Sus scrofa OX=9823 GN=LMNA PE=1 SV=1	tr|A0A287AE06|A0A287AE06_PIG	286140		3	SNEDQSMGNWQIKR	RT: 72.04
PEF-R1-1_SW_RA7_01_8012	Lamin A/C OS=Sus scrofa OX=9823 GN=LMNA PE=1 SV=1	tr|A0A287AE06|A0A287AE06_PIG	4655		-0.1	FPPKFTLK	RT: 27.59
PEF-R1-1_SW_RA7_01_8012	Lamin A/C OS=Sus scrofa OX=9823 GN=LMNA PE=1 SV=1	tr|A0A287AE06|A0A287AE06_PIG	270161		-3.7	SQNTWGCGNSLR	RT: 47.9
PEF-R1-1_SW_RA7_01_8012	Lamin A/C OS=Sus scrofa OX=9823 GN=LMNA PE=1 SV=1	tr|A0A287AE06|A0A287AE06_PIG	38342		7.8	TALINSTGEEVAMR	RT: 76.15
PEF-R1-1_SW_RA7_01_8012	Lamin A/C OS=Sus scrofa OX=9823 GN=LMNA PE=1 SV=1	tr|A0A287AE06|A0A287AE06_PIG	253232		-3.2	TALINSTGEEVAMR	RT: 50.13
PEF-R1-1_SW_RA7_01_8012	Lamin A/C OS=Sus scrofa OX=9823 GN=LMNA PE=1 SV=1	tr|A0A287AE06|A0A287AE06_PIG	144020		-5.2	TVLCGTCGQPADK	RT: 40.11
PEF-R1-1_SW_RA7_01_8012	Lamin A/C OS=Sus scrofa OX=9823 GN=LMNA PE=1 SV=1	tr|A0A287AE06|A0A287AE06_PIG	236702		-3.1	TVLCGTCGQPADKASASSSGAQVGGSISSGSSASSVTVTR	RT: 69.52
PEF-R1-1_SW_RA7_01_8012	Lamin A/C OS=Sus scrofa OX=9823 GN=LMNA PE=1 SV=1	tr|A0A287AE06|A0A287AE06_PIG	45695		-3.9	ASASSSGAQVGGSISSGSSASSVTVTR	RT: 66.26
PEF-R1-1_SW_RA7_01_8012	Lamin A/C OS=Sus scrofa OX=9823 GN=LMNA PE=1 SV=1	tr|A0A287AE06|A0A287AE06_PIG	233795		-8	SYRSVGGSGGGSFGDNLVTR	RT: 61.32
PEF-R1-1_SW_RA7_01_8012	Lamin A/C OS=Sus scrofa OX=9823 GN=LMNA PE=1 SV=1	tr|A0A287AE06|A0A287AE06_PIG	230033		-8.2	SYRSVGGSGGGSFGDNLVTR	RT: 61.32
PEF-R1-1_SW_RA7_01_8012	Lamin A/C OS=Sus scrofa OX=9823 GN=LMNA PE=1 SV=1	tr|A0A287AE06|A0A287AE06_PIG	331341		-6.1	SVGGSGGGSFGDNLVTR	RT: 68.2
PEF-R1-1_SW_RA7_01_8012	Lamin A/C OS=Sus scrofa OX=9823 GN=LMNA PE=1 SV=1	tr|A0A287AE06|A0A287AE06_PIG	45087		-1.9	SVGGSGGGSFGDNLVTR	RT: 68.2
PEF-R1-1_SW_RA7_01_8012	Lamin A/C OS=Sus scrofa OX=9823 GN=LMNA PE=1 SV=1	tr|A0A287AE06|A0A287AE06_PIG	461111		-9.4	SVGGSGGGSFGDNLVTRSYLLGNSRPR	RT: 64.03
PEF-R1-1_SW_RA7_01_8012	Lamin A/C OS=Sus scrofa OX=9823 GN=LMNA PE=1 SV=1	tr|A0A287AE06|A0A287AE06_PIG	202179		-7.6	SYLLGNSRPR	RT: 45.25
PEF-R1-1_SW_RA7_01_8012	Lamin A/C OS=Sus scrofa OX=9823 GN=LMNA PE=1 SV=1	tr|A0A287AE06|A0A287AE06_PIG	58938		-0.4	TQSPQNCSIM	RT: 49.57
PEF-R2-1_SW_RB4_01_8018	Lamin A/C OS=Sus scrofa OX=9823 GN=LMNA PE=1 SV=1	tr|A0A287AE06|A0A287AE06_PIG	37677		-1.3	METPSQR	RT: 29.69
PEF-R2-1_SW_RB4_01_8018	Lamin A/C OS=Sus scrofa OX=9823 GN=LMNA PE=1 SV=1	tr|A0A287AE06|A0A287AE06_PIG	17214		1.1	ATRSGAQASSTPLSPTR	RT: 31.01
PEF-R2-1_SW_RB4_01_8018	Lamin A/C OS=Sus scrofa OX=9823 GN=LMNA PE=1 SV=1	tr|A0A287AE06|A0A287AE06_PIG	1330		-4	SGAQASSTPLSPTR	RT: 42
PEF-R2-1_SW_RB4_01_8018	Lamin A/C OS=Sus scrofa OX=9823 GN=LMNA PE=1 SV=1	tr|A0A287AE06|A0A287AE06_PIG	72466		-3.8	SGAQASSTPLSPTR	RT: 42
PEF-R2-1_SW_RB4_01_8018	Lamin A/C OS=Sus scrofa OX=9823 GN=LMNA PE=1 SV=1	tr|A0A287AE06|A0A287AE06_PIG	21964		-1	SGAQASSTPLSPTRITR	RT: 53.36
PEF-R2-1_SW_RB4_01_8018	Lamin A/C OS=Sus scrofa OX=9823 GN=LMNA PE=1 SV=1	tr|A0A287AE06|A0A287AE06_PIG	6118		-0.8	LQEKEDLQELNDR	RT: 51.85
PEF-R2-1_SW_RB4_01_8018	Lamin A/C OS=Sus scrofa OX=9823 GN=LMNA PE=1 SV=1	tr|A0A287AE06|A0A287AE06_PIG	722		6.1	LAVYIDR	RT: 65.26
PEF-R2-1_SW_RB4_01_8018	Lamin A/C OS=Sus scrofa OX=9823 GN=LMNA PE=1 SV=1	tr|A0A287AE06|A0A287AE06_PIG	59793		-3.1	SLETENAGLR	RT: 42.42
PEF-R2-1_SW_RB4_01_8018	Lamin A/C OS=Sus scrofa OX=9823 GN=LMNA PE=1 SV=1	tr|A0A287AE06|A0A287AE06_PIG	368961		-2.9	SLETENAGLRLR	RT: 51.88
PEF-R2-1_SW_RB4_01_8018	Lamin A/C OS=Sus scrofa OX=9823 GN=LMNA PE=1 SV=1	tr|A0A287AE06|A0A287AE06_PIG	369132		-2.9	SLETENAGLRLR	RT: 51.88
PEF-R2-1_SW_RB4_01_8018	Lamin A/C OS=Sus scrofa OX=9823 GN=LMNA PE=1 SV=1	tr|A0A287AE06|A0A287AE06_PIG	18810		1.3	ITESEEVVSR	RT: 40.75
PEF-R2-1_SW_RB4_01_8018	Lamin A/C OS=Sus scrofa OX=9823 GN=LMNA PE=1 SV=1	tr|A0A287AE06|A0A287AE06_PIG	1083		-6.3	EVSGIKSAYEAELGDAR	RT: 31.57
PEF-R2-1_SW_RB4_01_8018	Lamin A/C OS=Sus scrofa OX=9823 GN=LMNA PE=1 SV=1	tr|A0A287AE06|A0A287AE06_PIG	6175		-7.3	EVSGIKSAYEAELGDAR	RT: 31.57
PEF-R2-1_SW_RB4_01_8018	Lamin A/C OS=Sus scrofa OX=9823 GN=LMNA PE=1 SV=1	tr|A0A287AE06|A0A287AE06_PIG	11096		-1.7	EVSGIKSAYEAELGDAR	RT: 31.57
PEF-R2-1_SW_RB4_01_8018	Lamin A/C OS=Sus scrofa OX=9823 GN=LMNA PE=1 SV=1	tr|A0A287AE06|A0A287AE06_PIG	39444		-7.3	SAYEAELGDAR	RT: 71.37
PEF-R2-1_SW_RB4_01_8018	Lamin A/C OS=Sus scrofa OX=9823 GN=LMNA PE=1 SV=1	tr|A0A287AE06|A0A287AE06_PIG	551		-1.7	SAYEAELGDARK	RT: 59.36
PEF-R2-1_SW_RB4_01_8018	Lamin A/C OS=Sus scrofa OX=9823 GN=LMNA PE=1 SV=1	tr|A0A287AE06|A0A287AE06_PIG	817		-4.5	KTLDSVAK	RT: 27.61
PEF-R2-1_SW_RB4_01_8018	Lamin A/C OS=Sus scrofa OX=9823 GN=LMNA PE=1 SV=1	tr|A0A287AE06|A0A287AE06_PIG	46303		-3	TLDSVAKER	RT: 33.17
PEF-R2-1_SW_RB4_01_8018	Lamin A/C OS=Sus scrofa OX=9823 GN=LMNA PE=1 SV=1	tr|A0A287AE06|A0A287AE06_PIG	210406		-2.1	KEGDLMAAQAR	RT: 53.35
PEF-R2-1_SW_RB4_01_8018	Lamin A/C OS=Sus scrofa OX=9823 GN=LMNA PE=1 SV=1	tr|A0A287AE06|A0A287AE06_PIG	39672		-6.7	KEGDLMAAQAR	RT: 52.6
PEF-R2-1_SW_RB4_01_8018	Lamin A/C OS=Sus scrofa OX=9823 GN=LMNA PE=1 SV=1	tr|A0A287AE06|A0A287AE06_PIG	41325		-6.8	KEGDLMAAQAR	RT: 52.6
PEF-R2-1_SW_RB4_01_8018	Lamin A/C OS=Sus scrofa OX=9823 GN=LMNA PE=1 SV=1	tr|A0A287AE06|A0A287AE06_PIG	188936		-1.7	EGDLMAAQAR	RT: 53.35
PEF-R2-1_SW_RB4_01_8018	Lamin A/C OS=Sus scrofa OX=9823 GN=LMNA PE=1 SV=1	tr|A0A287AE06|A0A287AE06_PIG	2546		2.2	EGDLMAAQARLK	RT: 101.77
PEF-R2-1_SW_RB4_01_8018	Lamin A/C OS=Sus scrofa OX=9823 GN=LMNA PE=1 SV=1	tr|A0A287AE06|A0A287AE06_PIG	27132		-0.5	EGDLMAAQARLK	RT: 101.77
PEF-R2-1_SW_RB4_01_8018	Lamin A/C OS=Sus scrofa OX=9823 GN=LMNA PE=1 SV=1	tr|A0A287AE06|A0A287AE06_PIG	836		1	LKDLEALLNSK	RT: 68.51
PEF-R2-1_SW_RB4_01_8018	Lamin A/C OS=Sus scrofa OX=9823 GN=LMNA PE=1 SV=1	tr|A0A287AE06|A0A287AE06_PIG	35967		-2.3	DLEALLNSKEAALSTALSEK	RT: 87.04
PEF-R2-1_SW_RB4_01_8018	Lamin A/C OS=Sus scrofa OX=9823 GN=LMNA PE=1 SV=1	tr|A0A287AE06|A0A287AE06_PIG	14649		-6.1	EAALSTALSEK	RT: 53.35
PEF-R2-1_SW_RB4_01_8018	Lamin A/C OS=Sus scrofa OX=9823 GN=LMNA PE=1 SV=1	tr|A0A287AE06|A0A287AE06_PIG	3838		3.7	RTLEGELHDLR	RT: 75.16
PEF-R2-1_SW_RB4_01_8018	Lamin A/C OS=Sus scrofa OX=9823 GN=LMNA PE=1 SV=1	tr|A0A287AE06|A0A287AE06_PIG	2451		-1.4	GQVAKLEAALGEAK	RT: 187.82
PEF-R2-1_SW_RB4_01_8018	Lamin A/C OS=Sus scrofa OX=9823 GN=LMNA PE=1 SV=1	tr|A0A287AE06|A0A287AE06_PIG	16549		-3.9	LEAALGEAK	RT: 80.08
PEF-R2-1_SW_RB4_01_8018	Lamin A/C OS=Sus scrofa OX=9823 GN=LMNA PE=1 SV=1	tr|A0A287AE06|A0A287AE06_PIG	7543		6.2	LEAALGEAKK	RT: 42
PEF-R2-1_SW_RB4_01_8018	Lamin A/C OS=Sus scrofa OX=9823 GN=LMNA PE=1 SV=1	tr|A0A287AE06|A0A287AE06_PIG	13433		-1.5	QLQDEMLRR	RT: 31.16
PEF-R2-1_SW_RB4_01_8018	Lamin A/C OS=Sus scrofa OX=9823 GN=LMNA PE=1 SV=1	tr|A0A287AE06|A0A287AE06_PIG	37145		-1.6	RVDAENR	RT: 37.27
PEF-R2-1_SW_RB4_01_8018	Lamin A/C OS=Sus scrofa OX=9823 GN=LMNA PE=1 SV=1	tr|A0A287AE06|A0A287AE06_PIG	61199		0.6	NIYSEELR	RT: 51.89
PEF-R2-1_SW_RB4_01_8018	Lamin A/C OS=Sus scrofa OX=9823 GN=LMNA PE=1 SV=1	tr|A0A287AE06|A0A287AE06_PIG	503614		-2.9	LADALQELR	RT: 85.28
PEF-R2-1_SW_RB4_01_8018	Lamin A/C OS=Sus scrofa OX=9823 GN=LMNA PE=1 SV=1	tr|A0A287AE06|A0A287AE06_PIG	19437		2.2	ELEKTYSAK	RT: 104.56
PEF-R2-1_SW_RB4_01_8018	Lamin A/C OS=Sus scrofa OX=9823 GN=LMNA PE=1 SV=1	tr|A0A287AE06|A0A287AE06_PIG	65341		-8.7	TYSAKLDNAR	RT: 37.41
PEF-R2-1_SW_RB4_01_8018	Lamin A/C OS=Sus scrofa OX=9823 GN=LMNA PE=1 SV=1	tr|A0A287AE06|A0A287AE06_PIG	1520		5.1	QSAERNSNLVGAAHEELQQSR	RT: 48.97
PEF-R2-1_SW_RB4_01_8018	Lamin A/C OS=Sus scrofa OX=9823 GN=LMNA PE=1 SV=1	tr|A0A287AE06|A0A287AE06_PIG	335122		-5.9	NSNLVGAAHEELQQSR	RT: 51.89
PEF-R2-1_SW_RB4_01_8018	Lamin A/C OS=Sus scrofa OX=9823 GN=LMNA PE=1 SV=1	tr|A0A287AE06|A0A287AE06_PIG	315229		-6.2	NSNLVGAAHEELQQSR	RT: 51.89
PEF-R2-1_SW_RB4_01_8018	Lamin A/C OS=Sus scrofa OX=9823 GN=LMNA PE=1 SV=1	tr|A0A287AE06|A0A287AE06_PIG	49286		-4.2	IRIDSLSAQLSQLQK	RT: 92.6
PEF-R2-1_SW_RB4_01_8018	Lamin A/C OS=Sus scrofa OX=9823 GN=LMNA PE=1 SV=1	tr|A0A287AE06|A0A287AE06_PIG	1159		-7.8	IDSLSAQLSQLQK	RT: 68.19
PEF-R2-1_SW_RB4_01_8018	Lamin A/C OS=Sus scrofa OX=9823 GN=LMNA PE=1 SV=1	tr|A0A287AE06|A0A287AE06_PIG	16207		2.5	QLAAKEAK	RT: 42
PEF-R2-1_SW_RB4_01_8018	Lamin A/C OS=Sus scrofa OX=9823 GN=LMNA PE=1 SV=1	tr|A0A287AE06|A0A287AE06_PIG	53181		1.6	DLEDSLAR	RT: 37.06
PEF-R2-1_SW_RB4_01_8018	Lamin A/C OS=Sus scrofa OX=9823 GN=LMNA PE=1 SV=1	tr|A0A287AE06|A0A287AE06_PIG	424118		-3.6	DLEDSLARER	RT: 51.89
PEF-R2-1_SW_RB4_01_8018	Lamin A/C OS=Sus scrofa OX=9823 GN=LMNA PE=1 SV=1	tr|A0A287AE06|A0A287AE06_PIG	436392		-3.6	DLEDSLARER	RT: 51.89
PEF-R2-1_SW_RB4_01_8018	Lamin A/C OS=Sus scrofa OX=9823 GN=LMNA PE=1 SV=1	tr|A0A287AE06|A0A287AE06_PIG	12141		1.4	LLADKER	RT: 30.32
PEF-R2-1_SW_RB4_01_8018	Lamin A/C OS=Sus scrofa OX=9823 GN=LMNA PE=1 SV=1	tr|A0A287AE06|A0A287AE06_PIG	174515		-1.9	EREMAEMR	RT: 53.35
PEF-R2-1_SW_RB4_01_8018	Lamin A/C OS=Sus scrofa OX=9823 GN=LMNA PE=1 SV=1	tr|A0A287AE06|A0A287AE06_PIG	5244		-4.6	MQQQLDEYQELLDIK	RT: 110.04
PEF-R2-1_SW_RB4_01_8018	Lamin A/C OS=Sus scrofa OX=9823 GN=LMNA PE=1 SV=1	tr|A0A287AE06|A0A287AE06_PIG	2223		2.1	LALDMEIHAYR	RT: 28.09
PEF-R2-1_SW_RB4_01_8018	Lamin A/C OS=Sus scrofa OX=9823 GN=LMNA PE=1 SV=1	tr|A0A287AE06|A0A287AE06_PIG	80465		-0.9	LLEGEEER	RT: 33.31
PEF-R2-1_SW_RB4_01_8018	Lamin A/C OS=Sus scrofa OX=9823 GN=LMNA PE=1 SV=1	tr|A0A287AE06|A0A287AE06_PIG	48602		-5.8	LLEGEEERLR	RT: 30.8
PEF-R2-1_SW_RB4_01_8018	Lamin A/C OS=Sus scrofa OX=9823 GN=LMNA PE=1 SV=1	tr|A0A287AE06|A0A287AE06_PIG	48488		-5.6	LLEGEEERLR	RT: 30.8
PEF-R2-1_SW_RB4_01_8018	Lamin A/C OS=Sus scrofa OX=9823 GN=LMNA PE=1 SV=1	tr|A0A287AE06|A0A287AE06_PIG	65987		-0.4	LRLSPSPTSQR	RT: 30.03
PEF-R2-1_SW_RB4_01_8018	Lamin A/C OS=Sus scrofa OX=9823 GN=LMNA PE=1 SV=1	tr|A0A287AE06|A0A287AE06_PIG	170867		-4.8	LSPSPTSQR	RT: 93.64
PEF-R2-1_SW_RB4_01_8018	Lamin A/C OS=Sus scrofa OX=9823 GN=LMNA PE=1 SV=1	tr|A0A287AE06|A0A287AE06_PIG	61104		0.5	LSPSPTSQRSR	RT: 48.97
PEF-R2-1_SW_RB4_01_8018	Lamin A/C OS=Sus scrofa OX=9823 GN=LMNA PE=1 SV=1	tr|A0A287AE06|A0A287AE06_PIG	703		-1.9	GRASSHSSQTQSGGSVTK	RT: 76.29
PEF-R2-1_SW_RB4_01_8018	Lamin A/C OS=Sus scrofa OX=9823 GN=LMNA PE=1 SV=1	tr|A0A287AE06|A0A287AE06_PIG	1368		5.1	ASSHSSQTQSGGSVTKK	RT: 79.81
PEF-R2-1_SW_RB4_01_8018	Lamin A/C OS=Sus scrofa OX=9823 GN=LMNA PE=1 SV=1	tr|A0A287AE06|A0A287AE06_PIG	3249		-1.4	KLESSESR	RT: 26.98
PEF-R2-1_SW_RB4_01_8018	Lamin A/C OS=Sus scrofa OX=9823 GN=LMNA PE=1 SV=1	tr|A0A287AE06|A0A287AE06_PIG	47747		-7.1	LESSESR	RT: 47.93
PEF-R2-1_SW_RB4_01_8018	Lamin A/C OS=Sus scrofa OX=9823 GN=LMNA PE=1 SV=1	tr|A0A287AE06|A0A287AE06_PIG	56905		-6.9	SSFSQHAR	RT: 47.92
PEF-R2-1_SW_RB4_01_8018	Lamin A/C OS=Sus scrofa OX=9823 GN=LMNA PE=1 SV=1	tr|A0A287AE06|A0A287AE06_PIG	2831		-4.1	VAVEEVDEEGKFVR	RT: 66.36
PEF-R2-1_SW_RB4_01_8018	Lamin A/C OS=Sus scrofa OX=9823 GN=LMNA PE=1 SV=1	tr|A0A287AE06|A0A287AE06_PIG	2831		-4.1	VAVEEVDEEGKFVR	RT: 66.36
PEF-R2-1_SW_RB4_01_8018	Lamin A/C OS=Sus scrofa OX=9823 GN=LMNA PE=1 SV=1	tr|A0A287AE06|A0A287AE06_PIG	209665		8.2	NKSNEDQSMGNWQIK	RT: 94.68
PEF-R2-1_SW_RB4_01_8018	Lamin A/C OS=Sus scrofa OX=9823 GN=LMNA PE=1 SV=1	tr|A0A287AE06|A0A287AE06_PIG	422826		-3.7	SNEDQSMGNWQIKR	RT: 51.89
PEF-R2-1_SW_RB4_01_8018	Lamin A/C OS=Sus scrofa OX=9823 GN=LMNA PE=1 SV=1	tr|A0A287AE06|A0A287AE06_PIG	718276		-5.2	SNEDQSMGNWQIKR	RT: 51.89
PEF-R2-1_SW_RB4_01_8018	Lamin A/C OS=Sus scrofa OX=9823 GN=LMNA PE=1 SV=1	tr|A0A287AE06|A0A287AE06_PIG	950		5.9	FPPKFTLK	RT: 24.81
PEF-R2-1_SW_RB4_01_8018	Lamin A/C OS=Sus scrofa OX=9823 GN=LMNA PE=1 SV=1	tr|A0A287AE06|A0A287AE06_PIG	22173		0.5	SQNTWGCGNSLR	RT: 49.81
PEF-R2-1_SW_RB4_01_8018	Lamin A/C OS=Sus scrofa OX=9823 GN=LMNA PE=1 SV=1	tr|A0A287AE06|A0A287AE06_PIG	2280		1.5	TALINSTGEEVAMR	RT: 73.69
PEF-R2-1_SW_RB4_01_8018	Lamin A/C OS=Sus scrofa OX=9823 GN=LMNA PE=1 SV=1	tr|A0A287AE06|A0A287AE06_PIG	55917		2.3	TALINSTGEEVAMR	RT: 54.46
PEF-R2-1_SW_RB4_01_8018	Lamin A/C OS=Sus scrofa OX=9823 GN=LMNA PE=1 SV=1	tr|A0A287AE06|A0A287AE06_PIG	18791		-0.4	TVLCGTCGQPADK	RT: 36.23
PEF-R2-1_SW_RB4_01_8018	Lamin A/C OS=Sus scrofa OX=9823 GN=LMNA PE=1 SV=1	tr|A0A287AE06|A0A287AE06_PIG	56240		-2.1	TVLCGTCGQPADKASASSSGAQVGGSISSGSSASSVTVTR	RT: 48.97
PEF-R2-1_SW_RB4_01_8018	Lamin A/C OS=Sus scrofa OX=9823 GN=LMNA PE=1 SV=1	tr|A0A287AE06|A0A287AE06_PIG	684		2.2	ASASSSGAQVGGSISSGSSASSVTVTR	RT: 69.93
PEF-R2-1_SW_RB4_01_8018	Lamin A/C OS=Sus scrofa OX=9823 GN=LMNA PE=1 SV=1	tr|A0A287AE06|A0A287AE06_PIG	93898		-4.5	SYRSVGGSGGGSFGDNLVTR	RT: 94.61
PEF-R2-1_SW_RB4_01_8018	Lamin A/C OS=Sus scrofa OX=9823 GN=LMNA PE=1 SV=1	tr|A0A287AE06|A0A287AE06_PIG	82061		-4.8	SYRSVGGSGGGSFGDNLVTR	RT: 94.61
PEF-R2-1_SW_RB4_01_8018	Lamin A/C OS=Sus scrofa OX=9823 GN=LMNA PE=1 SV=1	tr|A0A287AE06|A0A287AE06_PIG	10564		-5.8	SVGGSGGGSFGDNLVTR	RT: 51.47
PEF-R2-1_SW_RB4_01_8018	Lamin A/C OS=Sus scrofa OX=9823 GN=LMNA PE=1 SV=1	tr|A0A287AE06|A0A287AE06_PIG	14478		-6	SVGGSGGGSFGDNLVTR	RT: 51.47
PEF-R2-1_SW_RB4_01_8018	Lamin A/C OS=Sus scrofa OX=9823 GN=LMNA PE=1 SV=1	tr|A0A287AE06|A0A287AE06_PIG	155534		-1.9	SVGGSGGGSFGDNLVTRSYLLGNSRPR	RT: 53.35
PEF-R2-1_SW_RB4_01_8018	Lamin A/C OS=Sus scrofa OX=9823 GN=LMNA PE=1 SV=1	tr|A0A287AE06|A0A287AE06_PIG	46930		0.3	SYLLGNSRPR	RT: 29.68
PEF-R2-1_SW_RB4_01_8018	Lamin A/C OS=Sus scrofa OX=9823 GN=LMNA PE=1 SV=1	tr|A0A287AE06|A0A287AE06_PIG	3363		-1.8	TQSPQNCSIM	RT: 49.38
PEF-R3-1_SW_RC1_01_8030	Lamin A/C OS=Sus scrofa OX=9823 GN=LMNA PE=1 SV=1	tr|A0A287AE06|A0A287AE06_PIG	779912		-4.5	METPSQR	RT: 17.76
PEF-R3-1_SW_RC1_01_8030	Lamin A/C OS=Sus scrofa OX=9823 GN=LMNA PE=1 SV=1	tr|A0A287AE06|A0A287AE06_PIG	218063		-0.5	ATRSGAQASSTPLSPTR	RT: 33.55
PEF-R3-1_SW_RC1_01_8030	Lamin A/C OS=Sus scrofa OX=9823 GN=LMNA PE=1 SV=1	tr|A0A287AE06|A0A287AE06_PIG	44460		-4.5	SGAQASSTPLSPTR	RT: 68.11
PEF-R3-1_SW_RC1_01_8030	Lamin A/C OS=Sus scrofa OX=9823 GN=LMNA PE=1 SV=1	tr|A0A287AE06|A0A287AE06_PIG	2297898		1.5	SGAQASSTPLSPTR	RT: 68.11
PEF-R3-1_SW_RC1_01_8030	Lamin A/C OS=Sus scrofa OX=9823 GN=LMNA PE=1 SV=1	tr|A0A287AE06|A0A287AE06_PIG	114988		-3.5	SGAQASSTPLSPTRITR	RT: 51.62
PEF-R3-1_SW_RC1_01_8030	Lamin A/C OS=Sus scrofa OX=9823 GN=LMNA PE=1 SV=1	tr|A0A287AE06|A0A287AE06_PIG	1193656		-2.8	LQEKEDLQELNDR	RT: 50.79
PEF-R3-1_SW_RC1_01_8030	Lamin A/C OS=Sus scrofa OX=9823 GN=LMNA PE=1 SV=1	tr|A0A287AE06|A0A287AE06_PIG	1468434		-0.3	LAVYIDR	RT: 64.55
PEF-R3-1_SW_RC1_01_8030	Lamin A/C OS=Sus scrofa OX=9823 GN=LMNA PE=1 SV=1	tr|A0A287AE06|A0A287AE06_PIG	1496649		-0.4	SLETENAGLR	RT: 50.93
PEF-R3-1_SW_RC1_01_8030	Lamin A/C OS=Sus scrofa OX=9823 GN=LMNA PE=1 SV=1	tr|A0A287AE06|A0A287AE06_PIG	2921098		-3	SLETENAGLRLR	RT: 64.48
PEF-R3-1_SW_RC1_01_8030	Lamin A/C OS=Sus scrofa OX=9823 GN=LMNA PE=1 SV=1	tr|A0A287AE06|A0A287AE06_PIG	2915208		-3	SLETENAGLRLR	RT: 64.48
PEF-R3-1_SW_RC1_01_8030	Lamin A/C OS=Sus scrofa OX=9823 GN=LMNA PE=1 SV=1	tr|A0A287AE06|A0A287AE06_PIG	491549		-6.3	ITESEEVVSR	RT: 41.41
PEF-R3-1_SW_RC1_01_8030	Lamin A/C OS=Sus scrofa OX=9823 GN=LMNA PE=1 SV=1	tr|A0A287AE06|A0A287AE06_PIG	494		7.7	EVSGIKSAYEAELGDAR	RT: 17.63
PEF-R3-1_SW_RC1_01_8030	Lamin A/C OS=Sus scrofa OX=9823 GN=LMNA PE=1 SV=1	tr|A0A287AE06|A0A287AE06_PIG	161690		-4.2	EVSGIKSAYEAELGDAR	RT: 17.63
PEF-R3-1_SW_RC1_01_8030	Lamin A/C OS=Sus scrofa OX=9823 GN=LMNA PE=1 SV=1	tr|A0A287AE06|A0A287AE06_PIG	652916		-3.9	EVSGIKSAYEAELGDAR	RT: 17.63
PEF-R3-1_SW_RC1_01_8030	Lamin A/C OS=Sus scrofa OX=9823 GN=LMNA PE=1 SV=1	tr|A0A287AE06|A0A287AE06_PIG	3863517		0.5	SAYEAELGDAR	RT: 68.23
PEF-R3-1_SW_RC1_01_8030	Lamin A/C OS=Sus scrofa OX=9823 GN=LMNA PE=1 SV=1	tr|A0A287AE06|A0A287AE06_PIG	28614		1.7	SAYEAELGDARK	RT: 64.09
PEF-R3-1_SW_RC1_01_8030	Lamin A/C OS=Sus scrofa OX=9823 GN=LMNA PE=1 SV=1	tr|A0A287AE06|A0A287AE06_PIG	7467		-0.6	KTLDSVAK	RT: 28.75
PEF-R3-1_SW_RC1_01_8030	Lamin A/C OS=Sus scrofa OX=9823 GN=LMNA PE=1 SV=1	tr|A0A287AE06|A0A287AE06_PIG	275405		-4.6	TLDSVAKER	RT: 30.28
PEF-R3-1_SW_RC1_01_8030	Lamin A/C OS=Sus scrofa OX=9823 GN=LMNA PE=1 SV=1	tr|A0A287AE06|A0A287AE06_PIG	2051544		1.8	KEGDLMAAQAR	RT: 69.35
PEF-R3-1_SW_RC1_01_8030	Lamin A/C OS=Sus scrofa OX=9823 GN=LMNA PE=1 SV=1	tr|A0A287AE06|A0A287AE06_PIG	1124705		-2.8	KEGDLMAAQAR	RT: 51.2
PEF-R3-1_SW_RC1_01_8030	Lamin A/C OS=Sus scrofa OX=9823 GN=LMNA PE=1 SV=1	tr|A0A287AE06|A0A287AE06_PIG	1165156		-2.8	KEGDLMAAQAR	RT: 51.2
PEF-R3-1_SW_RC1_01_8030	Lamin A/C OS=Sus scrofa OX=9823 GN=LMNA PE=1 SV=1	tr|A0A287AE06|A0A287AE06_PIG	1799642		-1.1	EGDLMAAQAR	RT: 68.93
PEF-R3-1_SW_RC1_01_8030	Lamin A/C OS=Sus scrofa OX=9823 GN=LMNA PE=1 SV=1	tr|A0A287AE06|A0A287AE06_PIG	9158		8.8	EGDLMAAQARLK	RT: 58.99
PEF-R3-1_SW_RC1_01_8030	Lamin A/C OS=Sus scrofa OX=9823 GN=LMNA PE=1 SV=1	tr|A0A287AE06|A0A287AE06_PIG	65854		-5.5	EGDLMAAQARLK	RT: 58.99
PEF-R3-1_SW_RC1_01_8030	Lamin A/C OS=Sus scrofa OX=9823 GN=LMNA PE=1 SV=1	tr|A0A287AE06|A0A287AE06_PIG	334875		-1.9	LKDLEALLNSK	RT: 68.38
PEF-R3-1_SW_RC1_01_8030	Lamin A/C OS=Sus scrofa OX=9823 GN=LMNA PE=1 SV=1	tr|A0A287AE06|A0A287AE06_PIG	69483		3.2	DLEALLNSKEAALSTALSEK	RT: 86.52
PEF-R3-1_SW_RC1_01_8030	Lamin A/C OS=Sus scrofa OX=9823 GN=LMNA PE=1 SV=1	tr|A0A287AE06|A0A287AE06_PIG	237101		0.2	EAALSTALSEK	RT: 57.4
PEF-R3-1_SW_RC1_01_8030	Lamin A/C OS=Sus scrofa OX=9823 GN=LMNA PE=1 SV=1	tr|A0A287AE06|A0A287AE06_PIG	631028		0.2	RTLEGELHDLR	RT: 69.98
PEF-R3-1_SW_RC1_01_8030	Lamin A/C OS=Sus scrofa OX=9823 GN=LMNA PE=1 SV=1	tr|A0A287AE06|A0A287AE06_PIG	8911		-0.6	GQVAKLEAALGEAK	RT: 184.57
PEF-R3-1_SW_RC1_01_8030	Lamin A/C OS=Sus scrofa OX=9823 GN=LMNA PE=1 SV=1	tr|A0A287AE06|A0A287AE06_PIG	1256033		-6.5	LEAALGEAK	RT: 68.31
PEF-R3-1_SW_RC1_01_8030	Lamin A/C OS=Sus scrofa OX=9823 GN=LMNA PE=1 SV=1	tr|A0A287AE06|A0A287AE06_PIG	54758		0.1	LEAALGEAKK	RT: 38.07
PEF-R3-1_SW_RC1_01_8030	Lamin A/C OS=Sus scrofa OX=9823 GN=LMNA PE=1 SV=1	tr|A0A287AE06|A0A287AE06_PIG	1340602		-7.7	QLQDEMLRR	RT: 17.69
PEF-R3-1_SW_RC1_01_8030	Lamin A/C OS=Sus scrofa OX=9823 GN=LMNA PE=1 SV=1	tr|A0A287AE06|A0A287AE06_PIG	549328		1.4	RVDAENR	RT: 40.86
PEF-R3-1_SW_RC1_01_8030	Lamin A/C OS=Sus scrofa OX=9823 GN=LMNA PE=1 SV=1	tr|A0A287AE06|A0A287AE06_PIG	1323027		-2.7	NIYSEELR	RT: 50.79
PEF-R3-1_SW_RC1_01_8030	Lamin A/C OS=Sus scrofa OX=9823 GN=LMNA PE=1 SV=1	tr|A0A287AE06|A0A287AE06_PIG	3704468		-1.3	LADALQELR	RT: 68.44
PEF-R3-1_SW_RC1_01_8030	Lamin A/C OS=Sus scrofa OX=9823 GN=LMNA PE=1 SV=1	tr|A0A287AE06|A0A287AE06_PIG	120213		0.7	ELEKTYSAK	RT: 108.48
PEF-R3-1_SW_RC1_01_8030	Lamin A/C OS=Sus scrofa OX=9823 GN=LMNA PE=1 SV=1	tr|A0A287AE06|A0A287AE06_PIG	445379		-1	TYSAKLDNAR	RT: 37.51
PEF-R3-1_SW_RC1_01_8030	Lamin A/C OS=Sus scrofa OX=9823 GN=LMNA PE=1 SV=1	tr|A0A287AE06|A0A287AE06_PIG	26277		5.6	QSAERNSNLVGAAHEELQQSR	RT: 54.07
PEF-R3-1_SW_RC1_01_8030	Lamin A/C OS=Sus scrofa OX=9823 GN=LMNA PE=1 SV=1	tr|A0A287AE06|A0A287AE06_PIG	163400		-1.5	NSNLVGAAHEELQQSR	RT: 52.25
PEF-R3-1_SW_RC1_01_8030	Lamin A/C OS=Sus scrofa OX=9823 GN=LMNA PE=1 SV=1	tr|A0A287AE06|A0A287AE06_PIG	140562		-2.2	NSNLVGAAHEELQQSR	RT: 52.25
PEF-R3-1_SW_RC1_01_8030	Lamin A/C OS=Sus scrofa OX=9823 GN=LMNA PE=1 SV=1	tr|A0A287AE06|A0A287AE06_PIG	41458		-2.7	IRIDSLSAQLSQLQK	RT: 92.57
PEF-R3-1_SW_RC1_01_8030	Lamin A/C OS=Sus scrofa OX=9823 GN=LMNA PE=1 SV=1	tr|A0A287AE06|A0A287AE06_PIG	119491		3.4	IDSLSAQLSQLQK	RT: 67.19
PEF-R3-1_SW_RC1_01_8030	Lamin A/C OS=Sus scrofa OX=9823 GN=LMNA PE=1 SV=1	tr|A0A287AE06|A0A287AE06_PIG	54549		-1.8	QLAAKEAK	RT: 42.17
PEF-R3-1_SW_RC1_01_8030	Lamin A/C OS=Sus scrofa OX=9823 GN=LMNA PE=1 SV=1	tr|A0A287AE06|A0A287AE06_PIG	1032118		-0.4	DLEDSLAR	RT: 50.65
PEF-R3-1_SW_RC1_01_8030	Lamin A/C OS=Sus scrofa OX=9823 GN=LMNA PE=1 SV=1	tr|A0A287AE06|A0A287AE06_PIG	3487621		-0.5	DLEDSLARER	RT: 68.44
PEF-R3-1_SW_RC1_01_8030	Lamin A/C OS=Sus scrofa OX=9823 GN=LMNA PE=1 SV=1	tr|A0A287AE06|A0A287AE06_PIG	3533601		-0.5	DLEDSLARER	RT: 68.44
PEF-R3-1_SW_RC1_01_8030	Lamin A/C OS=Sus scrofa OX=9823 GN=LMNA PE=1 SV=1	tr|A0A287AE06|A0A287AE06_PIG	240711		-3	LLADKER	RT: 31.74
PEF-R3-1_SW_RC1_01_8030	Lamin A/C OS=Sus scrofa OX=9823 GN=LMNA PE=1 SV=1	tr|A0A287AE06|A0A287AE06_PIG	3501681		-1.5	EREMAEMR	RT: 68.37
PEF-R3-1_SW_RC1_01_8030	Lamin A/C OS=Sus scrofa OX=9823 GN=LMNA PE=1 SV=1	tr|A0A287AE06|A0A287AE06_PIG	32053		0.3	MQQQLDEYQELLDIK	RT: 117.81
PEF-R3-1_SW_RC1_01_8030	Lamin A/C OS=Sus scrofa OX=9823 GN=LMNA PE=1 SV=1	tr|A0A287AE06|A0A287AE06_PIG	77311		0.5	LALDMEIHAYR	RT: 26.8
PEF-R3-1_SW_RC1_01_8030	Lamin A/C OS=Sus scrofa OX=9823 GN=LMNA PE=1 SV=1	tr|A0A287AE06|A0A287AE06_PIG	1634836		3.2	LLEGEEER	RT: 69.21
PEF-R3-1_SW_RC1_01_8030	Lamin A/C OS=Sus scrofa OX=9823 GN=LMNA PE=1 SV=1	tr|A0A287AE06|A0A287AE06_PIG	1394486		3.3	LLEGEEERLR	RT: 64.34
PEF-R3-1_SW_RC1_01_8030	Lamin A/C OS=Sus scrofa OX=9823 GN=LMNA PE=1 SV=1	tr|A0A287AE06|A0A287AE06_PIG	1420079		3.1	LLEGEEERLR	RT: 64.34
PEF-R3-1_SW_RC1_01_8030	Lamin A/C OS=Sus scrofa OX=9823 GN=LMNA PE=1 SV=1	tr|A0A287AE06|A0A287AE06_PIG	212572		3.5	LRLSPSPTSQR	RT: 31.95
PEF-R3-1_SW_RC1_01_8030	Lamin A/C OS=Sus scrofa OX=9823 GN=LMNA PE=1 SV=1	tr|A0A287AE06|A0A287AE06_PIG	2975837		0.3	LSPSPTSQR	RT: 68.3
PEF-R3-1_SW_RC1_01_8030	Lamin A/C OS=Sus scrofa OX=9823 GN=LMNA PE=1 SV=1	tr|A0A287AE06|A0A287AE06_PIG	3128445		-3.4	LSPSPTSQRSR	RT: 64.48
PEF-R3-1_SW_RC1_01_8030	Lamin A/C OS=Sus scrofa OX=9823 GN=LMNA PE=1 SV=1	tr|A0A287AE06|A0A287AE06_PIG	48830		-0.9	GRASSHSSQTQSGGSVTK	RT: 74.22
PEF-R3-1_SW_RC1_01_8030	Lamin A/C OS=Sus scrofa OX=9823 GN=LMNA PE=1 SV=1	tr|A0A287AE06|A0A287AE06_PIG	14193		-3.6	ASSHSSQTQSGGSVTKK	RT: 77.07
PEF-R3-1_SW_RC1_01_8030	Lamin A/C OS=Sus scrofa OX=9823 GN=LMNA PE=1 SV=1	tr|A0A287AE06|A0A287AE06_PIG	282055		-3.2	KLESSESR	RT: 17.83
PEF-R3-1_SW_RC1_01_8030	Lamin A/C OS=Sus scrofa OX=9823 GN=LMNA PE=1 SV=1	tr|A0A287AE06|A0A287AE06_PIG	912703		-1	LESSESR	RT: 49.75
PEF-R3-1_SW_RC1_01_8030	Lamin A/C OS=Sus scrofa OX=9823 GN=LMNA PE=1 SV=1	tr|A0A287AE06|A0A287AE06_PIG	3363684		-0.8	SSFSQHAR	RT: 68.37
PEF-R3-1_SW_RC1_01_8030	Lamin A/C OS=Sus scrofa OX=9823 GN=LMNA PE=1 SV=1	tr|A0A287AE06|A0A287AE06_PIG	3496209		-0.2	VAVEEVDEEGKFVR	RT: 64.48
PEF-R3-1_SW_RC1_01_8030	Lamin A/C OS=Sus scrofa OX=9823 GN=LMNA PE=1 SV=1	tr|A0A287AE06|A0A287AE06_PIG	3474910		-0.1	VAVEEVDEEGKFVR	RT: 64.48
PEF-R3-1_SW_RC1_01_8030	Lamin A/C OS=Sus scrofa OX=9823 GN=LMNA PE=1 SV=1	tr|A0A287AE06|A0A287AE06_PIG	7790		-3.5	NKSNEDQSMGNWQIK	RT: 92.5
PEF-R3-1_SW_RC1_01_8030	Lamin A/C OS=Sus scrofa OX=9823 GN=LMNA PE=1 SV=1	tr|A0A287AE06|A0A287AE06_PIG	1755562		3.4	SNEDQSMGNWQIKR	RT: 69.42
PEF-R3-1_SW_RC1_01_8030	Lamin A/C OS=Sus scrofa OX=9823 GN=LMNA PE=1 SV=1	tr|A0A287AE06|A0A287AE06_PIG	2382163		2.1	SNEDQSMGNWQIKR	RT: 69.42
PEF-R3-1_SW_RC1_01_8030	Lamin A/C OS=Sus scrofa OX=9823 GN=LMNA PE=1 SV=1	tr|A0A287AE06|A0A287AE06_PIG	6156		-5.7	FPPKFTLK	RT: 24.09
PEF-R3-1_SW_RC1_01_8030	Lamin A/C OS=Sus scrofa OX=9823 GN=LMNA PE=1 SV=1	tr|A0A287AE06|A0A287AE06_PIG	1051878		0.6	SQNTWGCGNSLR	RT: 45.93
PEF-R3-1_SW_RC1_01_8030	Lamin A/C OS=Sus scrofa OX=9823 GN=LMNA PE=1 SV=1	tr|A0A287AE06|A0A287AE06_PIG	43529		-1	TALINSTGEEVAMR	RT: 73.52
PEF-R3-1_SW_RC1_01_8030	Lamin A/C OS=Sus scrofa OX=9823 GN=LMNA PE=1 SV=1	tr|A0A287AE06|A0A287AE06_PIG	1350919		0	TALINSTGEEVAMR	RT: 54.62
PEF-R3-1_SW_RC1_01_8030	Lamin A/C OS=Sus scrofa OX=9823 GN=LMNA PE=1 SV=1	tr|A0A287AE06|A0A287AE06_PIG	357371		1.5	TVLCGTCGQPADK	RT: 41.47
PEF-R3-1_SW_RC1_01_8030	Lamin A/C OS=Sus scrofa OX=9823 GN=LMNA PE=1 SV=1	tr|A0A287AE06|A0A287AE06_PIG	839667		-3.4	TVLCGTCGQPADKASASSSGAQVGGSISSGSSASSVTVTR	RT: 64.76
PEF-R3-1_SW_RC1_01_8030	Lamin A/C OS=Sus scrofa OX=9823 GN=LMNA PE=1 SV=1	tr|A0A287AE06|A0A287AE06_PIG	24282		-1.4	ASASSSGAQVGGSISSGSSASSVTVTR	RT: 67.2
PEF-R3-1_SW_RC1_01_8030	Lamin A/C OS=Sus scrofa OX=9823 GN=LMNA PE=1 SV=1	tr|A0A287AE06|A0A287AE06_PIG	2651374		0.3	SYRSVGGSGGGSFGDNLVTR	RT: 68.58
PEF-R3-1_SW_RC1_01_8030	Lamin A/C OS=Sus scrofa OX=9823 GN=LMNA PE=1 SV=1	tr|A0A287AE06|A0A287AE06_PIG	2589947		0.4	SYRSVGGSGGGSFGDNLVTR	RT: 68.58
PEF-R3-1_SW_RC1_01_8030	Lamin A/C OS=Sus scrofa OX=9823 GN=LMNA PE=1 SV=1	tr|A0A287AE06|A0A287AE06_PIG	311144		-1	SVGGSGGGSFGDNLVTR	RT: 64.34
PEF-R3-1_SW_RC1_01_8030	Lamin A/C OS=Sus scrofa OX=9823 GN=LMNA PE=1 SV=1	tr|A0A287AE06|A0A287AE06_PIG	1555397		3.2	SVGGSGGGSFGDNLVTR	RT: 64.34
PEF-R3-1_SW_RC1_01_8030	Lamin A/C OS=Sus scrofa OX=9823 GN=LMNA PE=1 SV=1	tr|A0A287AE06|A0A287AE06_PIG	1809237		-0.5	SVGGSGGGSFGDNLVTRSYLLGNSRPR	RT: 64.48
PEF-R3-1_SW_RC1_01_8030	Lamin A/C OS=Sus scrofa OX=9823 GN=LMNA PE=1 SV=1	tr|A0A287AE06|A0A287AE06_PIG	835221		-2.9	SYLLGNSRPR	RT: 45.59
PEF-R3-1_SW_RC1_01_8030	Lamin A/C OS=Sus scrofa OX=9823 GN=LMNA PE=1 SV=1	tr|A0A287AE06|A0A287AE06_PIG	18031		0.4	TQSPQNCSIM	RT: 45.44

## Sheet: A0A287BPI5
Replicate	Protein Description	Protein Name	Total Area		Average Mass Error PPM	Peptide Sequence	Peptide Result
iNS15-R1-1_SW_RB1_01_8014	Palladin isoform X4 OS=Sus scrofa OX=9823 GN=PALLD PE=1 SV=1	tr|A0A287BPI5|A0A287BPI5_PIG	2036211		-8.1	SLDLARR	RT: 65
iNS15-R1-1_SW_RB1_01_8014	Palladin isoform X4 OS=Sus scrofa OX=9823 GN=PALLD PE=1 SV=1	tr|A0A287BPI5|A0A287BPI5_PIG	621395		-6	KPAVSPLLASPSYIR	RT: 115.2
iNS15-R1-1_SW_RB1_01_8014	Palladin isoform X4 OS=Sus scrofa OX=9823 GN=PALLD PE=1 SV=1	tr|A0A287BPI5|A0A287BPI5_PIG	658901		-5.4	KPAVSPLLASPSYIR	RT: 115.2
iNS15-R1-1_SW_RB1_01_8014	Palladin isoform X4 OS=Sus scrofa OX=9823 GN=PALLD PE=1 SV=1	tr|A0A287BPI5|A0A287BPI5_PIG	175617		-1.1	APSTSAKPK	RT: 17.64
iNS15-R1-1_SW_RB1_01_8014	Palladin isoform X4 OS=Sus scrofa OX=9823 GN=PALLD PE=1 SV=1	tr|A0A287BPI5|A0A287BPI5_PIG	887452		-6.4	APSTSAKPKATR	RT: 50.19
iNS15-R1-1_SW_RB1_01_8014	Palladin isoform X4 OS=Sus scrofa OX=9823 GN=PALLD PE=1 SV=1	tr|A0A287BPI5|A0A287BPI5_PIG	824961		-7.3	APSTSAKPKATR	RT: 50.19
iNS15-R1-1_SW_RB1_01_8014	Palladin isoform X4 OS=Sus scrofa OX=9823 GN=PALLD PE=1 SV=1	tr|A0A287BPI5|A0A287BPI5_PIG	105963		0.4	HGRPGPQSQLCDK	RT: 57.28
iNS15-R1-1_SW_RB1_01_8014	Palladin isoform X4 OS=Sus scrofa OX=9823 GN=PALLD PE=1 SV=1	tr|A0A287BPI5|A0A287BPI5_PIG	706971		-2.1	AASFIEELTSIFR	RT: 46.3
iNS15-R1-1_SW_RB1_01_8014	Palladin isoform X4 OS=Sus scrofa OX=9823 GN=PALLD PE=1 SV=1	tr|A0A287BPI5|A0A287BPI5_PIG	1657541		-5.7	EAAKPRNR	RT: 69.94
iNS15-R1-1_SW_RB1_01_8014	Palladin isoform X4 OS=Sus scrofa OX=9823 GN=PALLD PE=1 SV=1	tr|A0A287BPI5|A0A287BPI5_PIG	215669		-3.8	SAPASQSPTGDPPEVDVEAEAK	RT: 76.96
iNS15-R1-1_SW_RB1_01_8014	Palladin isoform X4 OS=Sus scrofa OX=9823 GN=PALLD PE=1 SV=1	tr|A0A287BPI5|A0A287BPI5_PIG	49191		-3.3	LPVTGHHSSAAR	RT: 26.27
iNS15-R1-1_SW_RB1_01_8014	Palladin isoform X4 OS=Sus scrofa OX=9823 GN=PALLD PE=1 SV=1	tr|A0A287BPI5|A0A287BPI5_PIG	837007		-7.4	SSRSPSPPPPLSAR	RT: 51.79
iNS15-R1-1_SW_RB1_01_8014	Palladin isoform X4 OS=Sus scrofa OX=9823 GN=PALLD PE=1 SV=1	tr|A0A287BPI5|A0A287BPI5_PIG	1705611		-5.3	SPSPPPPLSAR	RT: 85.59
iNS15-R1-1_SW_RB1_01_8014	Palladin isoform X4 OS=Sus scrofa OX=9823 GN=PALLD PE=1 SV=1	tr|A0A287BPI5|A0A287BPI5_PIG	35055		1	LRSQEVAEGSR	RT: 215.8
iNS15-R1-1_SW_RB1_01_8014	Palladin isoform X4 OS=Sus scrofa OX=9823 GN=PALLD PE=1 SV=1	tr|A0A287BPI5|A0A287BPI5_PIG	2996813		-8.6	SQEVAEGSR	RT: 64.44
iNS15-R1-1_SW_RB1_01_8014	Palladin isoform X4 OS=Sus scrofa OX=9823 GN=PALLD PE=1 SV=1	tr|A0A287BPI5|A0A287BPI5_PIG	211413		-6.8	VYLECRVTGTPAPR	RT: 35.17
iNS15-R1-1_SW_RB1_01_8014	Palladin isoform X4 OS=Sus scrofa OX=9823 GN=PALLD PE=1 SV=1	tr|A0A287BPI5|A0A287BPI5_PIG	1823620		-4.6	VTGTPAPR	RT: 62.08
iNS15-R1-1_SW_RB1_01_8014	Palladin isoform X4 OS=Sus scrofa OX=9823 GN=PALLD PE=1 SV=1	tr|A0A287BPI5|A0A287BPI5_PIG	37240		1.8	SKPGAMPQAQK	RT: 40.67
iNS15-R1-1_SW_RB1_01_8014	Palladin isoform X4 OS=Sus scrofa OX=9823 GN=PALLD PE=1 SV=1	tr|A0A287BPI5|A0A287BPI5_PIG	103436		-4.5	SKPGAMPQAQK	RT: 41.78
iNS15-R1-1_SW_RB1_01_8014	Palladin isoform X4 OS=Sus scrofa OX=9823 GN=PALLD PE=1 SV=1	tr|A0A287BPI5|A0A287BPI5_PIG	416005		-2.7	TTSVSLTIGSSSPK	RT: 68.27
iNS15-R1-1_SW_RB1_01_8014	Palladin isoform X4 OS=Sus scrofa OX=9823 GN=PALLD PE=1 SV=1	tr|A0A287BPI5|A0A287BPI5_PIG	58520		-0.6	ELQSIAATEGQVVVLECRVR	RT: 198.58
iNS15-R1-1_SW_RB1_01_8014	Palladin isoform X4 OS=Sus scrofa OX=9823 GN=PALLD PE=1 SV=1	tr|A0A287BPI5|A0A287BPI5_PIG	1014049		-6.8	VRGAPPLQVR	RT: 50.05
iNS15-R1-1_SW_RB1_01_8014	Palladin isoform X4 OS=Sus scrofa OX=9823 GN=PALLD PE=1 SV=1	tr|A0A287BPI5|A0A287BPI5_PIG	667812		-7	GAPPLQVR	RT: 17.77
iNS15-R1-1_SW_RB1_01_8014	Palladin isoform X4 OS=Sus scrofa OX=9823 GN=PALLD PE=1 SV=1	tr|A0A287BPI5|A0A287BPI5_PIG	445341		-3.9	QGSEIQDSPDFR	RT: 57.3
iNS15-R1-1_SW_RB1_01_8014	Palladin isoform X4 OS=Sus scrofa OX=9823 GN=PALLD PE=1 SV=1	tr|A0A287BPI5|A0A287BPI5_PIG	179113		-7.1	ILQKKPR	RT: 31.2
iNS15-R1-1_SW_RB1_01_8014	Palladin isoform X4 OS=Sus scrofa OX=9823 GN=PALLD PE=1 SV=1	tr|A0A287BPI5|A0A287BPI5_PIG	120593		4.5	EPNGVHASHGHGMNGLVNGK	RT: 105.69
iNS15-R1-1_SW_RB1_01_8014	Palladin isoform X4 OS=Sus scrofa OX=9823 GN=PALLD PE=1 SV=1	tr|A0A287BPI5|A0A287BPI5_PIG	49856		1.8	AMQASGSFSYARPK	RT: 86.77
iNS15-R1-1_SW_RB1_01_8014	Palladin isoform X4 OS=Sus scrofa OX=9823 GN=PALLD PE=1 SV=1	tr|A0A287BPI5|A0A287BPI5_PIG	475817		-4.8	QFIAAQSLSPGSPASPTPPAGR	RT: 103.37
iNS15-R1-1_SW_RB1_01_8014	Palladin isoform X4 OS=Sus scrofa OX=9823 GN=PALLD PE=1 SV=1	tr|A0A287BPI5|A0A287BPI5_PIG	13338		2.7	SGPGPAPAALLCALLPSPPAAATVPTTVSALGLPR	RT: 183.42
iNS15-R1-1_SW_RB1_01_8014	Palladin isoform X4 OS=Sus scrofa OX=9823 GN=PALLD PE=1 SV=1	tr|A0A287BPI5|A0A287BPI5_PIG	4370		-3.4	SGPGPAPAALLCALLPSPPAAATVPTTVSALGLPR	RT: 183.42
iNS15-R1-1_SW_RB1_01_8014	Palladin isoform X4 OS=Sus scrofa OX=9823 GN=PALLD PE=1 SV=1	tr|A0A287BPI5|A0A287BPI5_PIG	134653		-3.4	AAPAAAFPK	RT: 47.28
iNS15-R1-1_SW_RB1_01_8014	Palladin isoform X4 OS=Sus scrofa OX=9823 GN=PALLD PE=1 SV=1	tr|A0A287BPI5|A0A287BPI5_PIG	162374		1.7	TTRMASDEEIQGSK	RT: 57.22
iNS15-R1-1_SW_RB1_01_8014	Palladin isoform X4 OS=Sus scrofa OX=9823 GN=PALLD PE=1 SV=1	tr|A0A287BPI5|A0A287BPI5_PIG	85481		0.8	TTRMASDEEIQGSK	RT: 82.45
iNS15-R1-1_SW_RB1_01_8014	Palladin isoform X4 OS=Sus scrofa OX=9823 GN=PALLD PE=1 SV=1	tr|A0A287BPI5|A0A287BPI5_PIG	51946		2	MASDEEIQGSKDAVIQDLER	RT: 84.9
iNS15-R1-1_SW_RB1_01_8014	Palladin isoform X4 OS=Sus scrofa OX=9823 GN=PALLD PE=1 SV=1	tr|A0A287BPI5|A0A287BPI5_PIG	1731071		-5.8	DAVIQDLER	RT: 61.18
iNS15-R1-1_SW_RB1_01_8014	Palladin isoform X4 OS=Sus scrofa OX=9823 GN=PALLD PE=1 SV=1	tr|A0A287BPI5|A0A287BPI5_PIG	716927		-6.7	FKEDLLNNGQPR	RT: 51.58
iNS15-R1-1_SW_RB1_01_8014	Palladin isoform X4 OS=Sus scrofa OX=9823 GN=PALLD PE=1 SV=1	tr|A0A287BPI5|A0A287BPI5_PIG	3056131		-8.8	EDLLNNGQPR	RT: 64.45
iNS15-R1-1_SW_RB1_01_8014	Palladin isoform X4 OS=Sus scrofa OX=9823 GN=PALLD PE=1 SV=1	tr|A0A287BPI5|A0A287BPI5_PIG	263872		-4.8	LTYEERMAR	RT: 39.69
iNS15-R1-1_SW_RB1_01_8014	Palladin isoform X4 OS=Sus scrofa OX=9823 GN=PALLD PE=1 SV=1	tr|A0A287BPI5|A0A287BPI5_PIG	681948		-7.6	VSSCEQR	RT: 76.54
iNS15-R1-1_SW_RB1_01_8014	Palladin isoform X4 OS=Sus scrofa OX=9823 GN=PALLD PE=1 SV=1	tr|A0A287BPI5|A0A287BPI5_PIG	742653		-7.7	VFEGMPVTFMCR	RT: 54.15
iNS15-R1-1_SW_RB1_01_8014	Palladin isoform X4 OS=Sus scrofa OX=9823 GN=PALLD PE=1 SV=1	tr|A0A287BPI5|A0A287BPI5_PIG	2052950		-7	VFEGMPVTFMCR	RT: 67.36
iNS15-R1-1_SW_RB1_01_8014	Palladin isoform X4 OS=Sus scrofa OX=9823 GN=PALLD PE=1 SV=1	tr|A0A287BPI5|A0A287BPI5_PIG	2153080		-6.4	VFEGMPVTFMCR	RT: 67.36
iNS15-R1-1_SW_RB1_01_8014	Palladin isoform X4 OS=Sus scrofa OX=9823 GN=PALLD PE=1 SV=1	tr|A0A287BPI5|A0A287BPI5_PIG	18183		-4.9	VFEGMPVTFMCRVTGNPKPK	RT: 141.56
iNS15-R1-1_SW_RB1_01_8014	Palladin isoform X4 OS=Sus scrofa OX=9823 GN=PALLD PE=1 SV=1	tr|A0A287BPI5|A0A287BPI5_PIG	878237		-7	VTGNPKPK	RT: 62.02
iNS15-R1-1_SW_RB1_01_8014	Palladin isoform X4 OS=Sus scrofa OX=9823 GN=PALLD PE=1 SV=1	tr|A0A287BPI5|A0A287BPI5_PIG	2188268		-6.1	DGKQVSPR	RT: 60.91
iNS15-R1-1_SW_RB1_01_8014	Palladin isoform X4 OS=Sus scrofa OX=9823 GN=PALLD PE=1 SV=1	tr|A0A287BPI5|A0A287BPI5_PIG	481973		-6.7	LMVQAVNQR	RT: 75.98
iNS15-R1-1_SW_RB1_01_8014	Palladin isoform X4 OS=Sus scrofa OX=9823 GN=PALLD PE=1 SV=1	tr|A0A287BPI5|A0A287BPI5_PIG	208487		-4.8	LMVQAVNQR	RT: 33.5
iNS15-R1-1_SW_RB1_01_8014	Palladin isoform X4 OS=Sus scrofa OX=9823 GN=PALLD PE=1 SV=1	tr|A0A287BPI5|A0A287BPI5_PIG	463353		-7.6	LMVQAVNQRGR	RT: 79.06
iNS15-R1-1_SW_RB1_01_8014	Palladin isoform X4 OS=Sus scrofa OX=9823 GN=PALLD PE=1 SV=1	tr|A0A287BPI5|A0A287BPI5_PIG	3198916		-7.2	LMVQAVNQRGR	RT: 64.31
iNS15-R1-1_SW_RB1_01_8014	Palladin isoform X4 OS=Sus scrofa OX=9823 GN=PALLD PE=1 SV=1	tr|A0A287BPI5|A0A287BPI5_PIG	342019		-7	SPRSPAGHPHGR	RT: 37.88
iNS15-R1-1_SW_RB1_01_8014	Palladin isoform X4 OS=Sus scrofa OX=9823 GN=PALLD PE=1 SV=1	tr|A0A287BPI5|A0A287BPI5_PIG	1387000		-7.3	SPAGHPHGR	RT: 58.05
iNS15-R1-1_SW_RB1_01_8014	Palladin isoform X4 OS=Sus scrofa OX=9823 GN=PALLD PE=1 SV=1	tr|A0A287BPI5|A0A287BPI5_PIG	844607		-4	SRDSADESEPIQER	RT: 47.89
iNS15-R1-1_SW_RB1_01_8014	Palladin isoform X4 OS=Sus scrofa OX=9823 GN=PALLD PE=1 SV=1	tr|A0A287BPI5|A0A287BPI5_PIG	290776		-1.9	FFRPHFLQAPGDLTVQEGKLCR	RT: 133.05
iNS15-R1-1_SW_RB1_01_8014	Palladin isoform X4 OS=Sus scrofa OX=9823 GN=PALLD PE=1 SV=1	tr|A0A287BPI5|A0A287BPI5_PIG	243922		-3.4	FFRPHFLQAPGDLTVQEGKLCR	RT: 133.05
iNS15-R1-1_SW_RB1_01_8014	Palladin isoform X4 OS=Sus scrofa OX=9823 GN=PALLD PE=1 SV=1	tr|A0A287BPI5|A0A287BPI5_PIG	236949		-1.9	LCRMDCK	RT: 128.76
iNS15-R1-1_SW_RB1_01_8014	Palladin isoform X4 OS=Sus scrofa OX=9823 GN=PALLD PE=1 SV=1	tr|A0A287BPI5|A0A287BPI5_PIG	148447		0.7	VSGLPTPDLSWQLDGKPIRPDSAHK	RT: 160.64
iNS15-R1-1_SW_RB1_01_8014	Palladin isoform X4 OS=Sus scrofa OX=9823 GN=PALLD PE=1 SV=1	tr|A0A287BPI5|A0A287BPI5_PIG	1865914		-6.7	ENGVHSLIIEPVSAR	RT: 61.11
iNS15-R1-1_SW_RB1_01_8014	Palladin isoform X4 OS=Sus scrofa OX=9823 GN=PALLD PE=1 SV=1	tr|A0A287BPI5|A0A287BPI5_PIG	2148159		-7.7	DAGIYTCVATNR	RT: 67.92
iNS15-R1-1_SW_RB1_01_8014	Palladin isoform X4 OS=Sus scrofa OX=9823 GN=PALLD PE=1 SV=1	tr|A0A287BPI5|A0A287BPI5_PIG	2746735		-7.7	LQNTGVADGYPVR	RT: 64.31
iNS15-R1-1_SW_RB1_01_8014	Palladin isoform X4 OS=Sus scrofa OX=9823 GN=PALLD PE=1 SV=1	tr|A0A287BPI5|A0A287BPI5_PIG	1827211		-8.3	LQNTGVADGYPVRLECR	RT: 65.56
iNS15-R1-1_SW_RB1_01_8014	Palladin isoform X4 OS=Sus scrofa OX=9823 GN=PALLD PE=1 SV=1	tr|A0A287BPI5|A0A287BPI5_PIG	92606		-1.4	VAGAPPPQIFWK	RT: 94.34
iNS15-R1-1_SW_RB1_01_8014	Palladin isoform X4 OS=Sus scrofa OX=9823 GN=PALLD PE=1 SV=1	tr|A0A287BPI5|A0A287BPI5_PIG	440078		-6.1	KENESLTHSTDR	RT: 80.24
iNS15-R1-1_SW_RB1_01_8014	Palladin isoform X4 OS=Sus scrofa OX=9823 GN=PALLD PE=1 SV=1	tr|A0A287BPI5|A0A287BPI5_PIG	98477		-2	VSMHQDSHGYVCLLIQGASK	RT: 55.34
iNS15-R1-1_SW_RB1_01_8014	Palladin isoform X4 OS=Sus scrofa OX=9823 GN=PALLD PE=1 SV=1	tr|A0A287BPI5|A0A287BPI5_PIG	359309		-7	NEAGIVSCTAR	RT: 37.88
iNS15-R1-1_SW_RB1_01_8014	Palladin isoform X4 OS=Sus scrofa OX=9823 GN=PALLD PE=1 SV=1	tr|A0A287BPI5|A0A287BPI5_PIG	225188		-2.9	RVRPSASR	RT: 33.43
iNS15-R1-1_SW_RB1_01_8014	Palladin isoform X4 OS=Sus scrofa OX=9823 GN=PALLD PE=1 SV=1	tr|A0A287BPI5|A0A287BPI5_PIG	334381		0.9	YAALSDQGLDIR	RT: 84.96
iNS15-R1-1_SW_RB1_01_8014	Palladin isoform X4 OS=Sus scrofa OX=9823 GN=PALLD PE=1 SV=1	tr|A0A287BPI5|A0A287BPI5_PIG	160645		1.9	AAFQPEASPSHLTLSPGLVESEDL	RT: 132.63
iNS15-R2-1_SW_RB6_01_8020	Palladin isoform X4 OS=Sus scrofa OX=9823 GN=PALLD PE=1 SV=1	tr|A0A287BPI5|A0A287BPI5_PIG	161386		-8.3	SLDLARR	RT: 64.28
iNS15-R2-1_SW_RB6_01_8020	Palladin isoform X4 OS=Sus scrofa OX=9823 GN=PALLD PE=1 SV=1	tr|A0A287BPI5|A0A287BPI5_PIG	3192		2.7	KPAVSPLLASPSYIR	RT: 132.25
iNS15-R2-1_SW_RB6_01_8020	Palladin isoform X4 OS=Sus scrofa OX=9823 GN=PALLD PE=1 SV=1	tr|A0A287BPI5|A0A287BPI5_PIG	3192		2.7	KPAVSPLLASPSYIR	RT: 132.25
iNS15-R2-1_SW_RB6_01_8020	Palladin isoform X4 OS=Sus scrofa OX=9823 GN=PALLD PE=1 SV=1	tr|A0A287BPI5|A0A287BPI5_PIG	836		-0.3	APSTSAKPK	RT: 26.01
iNS15-R2-1_SW_RB6_01_8020	Palladin isoform X4 OS=Sus scrofa OX=9823 GN=PALLD PE=1 SV=1	tr|A0A287BPI5|A0A287BPI5_PIG	43928		-2.5	APSTSAKPKATR	RT: 32.41
iNS15-R2-1_SW_RB6_01_8020	Palladin isoform X4 OS=Sus scrofa OX=9823 GN=PALLD PE=1 SV=1	tr|A0A287BPI5|A0A287BPI5_PIG	43320		-2.6	APSTSAKPKATR	RT: 32.41
iNS15-R2-1_SW_RB6_01_8020	Palladin isoform X4 OS=Sus scrofa OX=9823 GN=PALLD PE=1 SV=1	tr|A0A287BPI5|A0A287BPI5_PIG	5491		-5.5	HGRPGPQSQLCDK	RT: 54.47
iNS15-R2-1_SW_RB6_01_8020	Palladin isoform X4 OS=Sus scrofa OX=9823 GN=PALLD PE=1 SV=1	tr|A0A287BPI5|A0A287BPI5_PIG	34713		-1	AASFIEELTSIFR	RT: 47.02
iNS15-R2-1_SW_RB6_01_8020	Palladin isoform X4 OS=Sus scrofa OX=9823 GN=PALLD PE=1 SV=1	tr|A0A287BPI5|A0A287BPI5_PIG	1083		0.2	EAAKPRNR	RT: 71.93
iNS15-R2-1_SW_RB6_01_8020	Palladin isoform X4 OS=Sus scrofa OX=9823 GN=PALLD PE=1 SV=1	tr|A0A287BPI5|A0A287BPI5_PIG	4066		-7.2	SAPASQSPTGDPPEVDVEAEAK	RT: 66.65
iNS15-R2-1_SW_RB6_01_8020	Palladin isoform X4 OS=Sus scrofa OX=9823 GN=PALLD PE=1 SV=1	tr|A0A287BPI5|A0A287BPI5_PIG	969		2	LPVTGHHSSAAR	RT: 26
iNS15-R2-1_SW_RB6_01_8020	Palladin isoform X4 OS=Sus scrofa OX=9823 GN=PALLD PE=1 SV=1	tr|A0A287BPI5|A0A287BPI5_PIG	45448		0.3	SSRSPSPPPPLSAR	RT: 46.81
iNS15-R2-1_SW_RB6_01_8020	Palladin isoform X4 OS=Sus scrofa OX=9823 GN=PALLD PE=1 SV=1	tr|A0A287BPI5|A0A287BPI5_PIG	236398		-3.9	SPSPPPPLSAR	RT: 85.15
iNS15-R2-1_SW_RB6_01_8020	Palladin isoform X4 OS=Sus scrofa OX=9823 GN=PALLD PE=1 SV=1	tr|A0A287BPI5|A0A287BPI5_PIG	1197		-0.5	LRSQEVAEGSR	RT: 217.17
iNS15-R2-1_SW_RB6_01_8020	Palladin isoform X4 OS=Sus scrofa OX=9823 GN=PALLD PE=1 SV=1	tr|A0A287BPI5|A0A287BPI5_PIG	82688		-7.3	SQEVAEGSR	RT: 33.72
iNS15-R2-1_SW_RB6_01_8020	Palladin isoform X4 OS=Sus scrofa OX=9823 GN=PALLD PE=1 SV=1	tr|A0A287BPI5|A0A287BPI5_PIG	30533		-5.9	VYLECRVTGTPAPR	RT: 36.45
iNS15-R2-1_SW_RB6_01_8020	Palladin isoform X4 OS=Sus scrofa OX=9823 GN=PALLD PE=1 SV=1	tr|A0A287BPI5|A0A287BPI5_PIG	42750		-4.9	VTGTPAPR	RT: 47.37
iNS15-R2-1_SW_RB6_01_8020	Palladin isoform X4 OS=Sus scrofa OX=9823 GN=PALLD PE=1 SV=1	tr|A0A287BPI5|A0A287BPI5_PIG	4465		-4.3	SKPGAMPQAQK	RT: 40.34
iNS15-R2-1_SW_RB6_01_8020	Palladin isoform X4 OS=Sus scrofa OX=9823 GN=PALLD PE=1 SV=1	tr|A0A287BPI5|A0A287BPI5_PIG	7828		-4.9	SKPGAMPQAQK	RT: 38.39
iNS15-R2-1_SW_RB6_01_8020	Palladin isoform X4 OS=Sus scrofa OX=9823 GN=PALLD PE=1 SV=1	tr|A0A287BPI5|A0A287BPI5_PIG	10754		1.1	TTSVSLTIGSSSPK	RT: 54.47
iNS15-R2-1_SW_RB6_01_8020	Palladin isoform X4 OS=Sus scrofa OX=9823 GN=PALLD PE=1 SV=1	tr|A0A287BPI5|A0A287BPI5_PIG	1691		-4.7	ELQSIAATEGQVVVLECRVR	RT: 197.4
iNS15-R2-1_SW_RB6_01_8020	Palladin isoform X4 OS=Sus scrofa OX=9823 GN=PALLD PE=1 SV=1	tr|A0A287BPI5|A0A287BPI5_PIG	48564		3.3	VRGAPPLQVR	RT: 41.17
iNS15-R2-1_SW_RB6_01_8020	Palladin isoform X4 OS=Sus scrofa OX=9823 GN=PALLD PE=1 SV=1	tr|A0A287BPI5|A0A287BPI5_PIG	42807		-3.8	GAPPLQVR	RT: 32.12
iNS15-R2-1_SW_RB6_01_8020	Palladin isoform X4 OS=Sus scrofa OX=9823 GN=PALLD PE=1 SV=1	tr|A0A287BPI5|A0A287BPI5_PIG	5377		-0.2	QGSEIQDSPDFR	RT: 54.89
iNS15-R2-1_SW_RB6_01_8020	Palladin isoform X4 OS=Sus scrofa OX=9823 GN=PALLD PE=1 SV=1	tr|A0A287BPI5|A0A287BPI5_PIG	62605		-1.6	ILQKKPR	RT: 34.56
iNS15-R2-1_SW_RB6_01_8020	Palladin isoform X4 OS=Sus scrofa OX=9823 GN=PALLD PE=1 SV=1	tr|A0A287BPI5|A0A287BPI5_PIG	494		-2.1	EPNGVHASHGHGMNGLVNGK	RT: 103.7
iNS15-R2-1_SW_RB6_01_8020	Palladin isoform X4 OS=Sus scrofa OX=9823 GN=PALLD PE=1 SV=1	tr|A0A287BPI5|A0A287BPI5_PIG	1292		-7.1	AMQASGSFSYARPK	RT: 85.43
iNS15-R2-1_SW_RB6_01_8020	Palladin isoform X4 OS=Sus scrofa OX=9823 GN=PALLD PE=1 SV=1	tr|A0A287BPI5|A0A287BPI5_PIG	2223		-3.2	QFIAAQSLSPGSPASPTPPAGR	RT: 102.82
iNS15-R2-1_SW_RB6_01_8020	Palladin isoform X4 OS=Sus scrofa OX=9823 GN=PALLD PE=1 SV=1	tr|A0A287BPI5|A0A287BPI5_PIG	836		3.1	SGPGPAPAALLCALLPSPPAAATVPTTVSALGLPR	RT: 181.69
iNS15-R2-1_SW_RB6_01_8020	Palladin isoform X4 OS=Sus scrofa OX=9823 GN=PALLD PE=1 SV=1	tr|A0A287BPI5|A0A287BPI5_PIG	1102		1.6	SGPGPAPAALLCALLPSPPAAATVPTTVSALGLPR	RT: 181.69
iNS15-R2-1_SW_RB6_01_8020	Palladin isoform X4 OS=Sus scrofa OX=9823 GN=PALLD PE=1 SV=1	tr|A0A287BPI5|A0A287BPI5_PIG	13129		-1.5	AAPAAAFPK	RT: 43.82
iNS15-R2-1_SW_RB6_01_8020	Palladin isoform X4 OS=Sus scrofa OX=9823 GN=PALLD PE=1 SV=1	tr|A0A287BPI5|A0A287BPI5_PIG	2546		-2.2	TTRMASDEEIQGSK	RT: 59
iNS15-R2-1_SW_RB6_01_8020	Palladin isoform X4 OS=Sus scrofa OX=9823 GN=PALLD PE=1 SV=1	tr|A0A287BPI5|A0A287BPI5_PIG	1805		-1.7	TTRMASDEEIQGSK	RT: 80.63
iNS15-R2-1_SW_RB6_01_8020	Palladin isoform X4 OS=Sus scrofa OX=9823 GN=PALLD PE=1 SV=1	tr|A0A287BPI5|A0A287BPI5_PIG	494		7	MASDEEIQGSKDAVIQDLER	RT: 83.32
iNS15-R2-1_SW_RB6_01_8020	Palladin isoform X4 OS=Sus scrofa OX=9823 GN=PALLD PE=1 SV=1	tr|A0A287BPI5|A0A287BPI5_PIG	28538		-0.5	DAVIQDLER	RT: 63.37
iNS15-R2-1_SW_RB6_01_8020	Palladin isoform X4 OS=Sus scrofa OX=9823 GN=PALLD PE=1 SV=1	tr|A0A287BPI5|A0A287BPI5_PIG	87723		-2.3	FKEDLLNNGQPR	RT: 34.56
iNS15-R2-1_SW_RB6_01_8020	Palladin isoform X4 OS=Sus scrofa OX=9823 GN=PALLD PE=1 SV=1	tr|A0A287BPI5|A0A287BPI5_PIG	35739		-0.3	EDLLNNGQPR	RT: 63.38
iNS15-R2-1_SW_RB6_01_8020	Palladin isoform X4 OS=Sus scrofa OX=9823 GN=PALLD PE=1 SV=1	tr|A0A287BPI5|A0A287BPI5_PIG	39805		-2.8	LTYEERMAR	RT: 37
iNS15-R2-1_SW_RB6_01_8020	Palladin isoform X4 OS=Sus scrofa OX=9823 GN=PALLD PE=1 SV=1	tr|A0A287BPI5|A0A287BPI5_PIG	1539		-2.8	VSSCEQR	RT: 78.26
iNS15-R2-1_SW_RB6_01_8020	Palladin isoform X4 OS=Sus scrofa OX=9823 GN=PALLD PE=1 SV=1	tr|A0A287BPI5|A0A287BPI5_PIG	12084		4.2	VFEGMPVTFMCR	RT: 52.17
iNS15-R2-1_SW_RB6_01_8020	Palladin isoform X4 OS=Sus scrofa OX=9823 GN=PALLD PE=1 SV=1	tr|A0A287BPI5|A0A287BPI5_PIG	161975		-7.9	VFEGMPVTFMCR	RT: 64.28
iNS15-R2-1_SW_RB6_01_8020	Palladin isoform X4 OS=Sus scrofa OX=9823 GN=PALLD PE=1 SV=1	tr|A0A287BPI5|A0A287BPI5_PIG	160170		-8	VFEGMPVTFMCR	RT: 64.28
iNS15-R2-1_SW_RB6_01_8020	Palladin isoform X4 OS=Sus scrofa OX=9823 GN=PALLD PE=1 SV=1	tr|A0A287BPI5|A0A287BPI5_PIG	1292		3.9	VFEGMPVTFMCRVTGNPKPK	RT: 143.03
iNS15-R2-1_SW_RB6_01_8020	Palladin isoform X4 OS=Sus scrofa OX=9823 GN=PALLD PE=1 SV=1	tr|A0A287BPI5|A0A287BPI5_PIG	28538		-6.4	VTGNPKPK	RT: 44.3
iNS15-R2-1_SW_RB6_01_8020	Palladin isoform X4 OS=Sus scrofa OX=9823 GN=PALLD PE=1 SV=1	tr|A0A287BPI5|A0A287BPI5_PIG	42959		-2.8	DGKQVSPR	RT: 37
iNS15-R2-1_SW_RB6_01_8020	Palladin isoform X4 OS=Sus scrofa OX=9823 GN=PALLD PE=1 SV=1	tr|A0A287BPI5|A0A287BPI5_PIG	1140		-2.5	LMVQAVNQR	RT: 72.91
iNS15-R2-1_SW_RB6_01_8020	Palladin isoform X4 OS=Sus scrofa OX=9823 GN=PALLD PE=1 SV=1	tr|A0A287BPI5|A0A287BPI5_PIG	46968		-2.2	LMVQAVNQR	RT: 32.41
iNS15-R2-1_SW_RB6_01_8020	Palladin isoform X4 OS=Sus scrofa OX=9823 GN=PALLD PE=1 SV=1	tr|A0A287BPI5|A0A287BPI5_PIG	2489		7.5	LMVQAVNQRGR	RT: 82.44
iNS15-R2-1_SW_RB6_01_8020	Palladin isoform X4 OS=Sus scrofa OX=9823 GN=PALLD PE=1 SV=1	tr|A0A287BPI5|A0A287BPI5_PIG	162070		-7.4	LMVQAVNQRGR	RT: 64.28
iNS15-R2-1_SW_RB6_01_8020	Palladin isoform X4 OS=Sus scrofa OX=9823 GN=PALLD PE=1 SV=1	tr|A0A287BPI5|A0A287BPI5_PIG	83600		-1.9	SPRSPAGHPHGR	RT: 34.56
iNS15-R2-1_SW_RB6_01_8020	Palladin isoform X4 OS=Sus scrofa OX=9823 GN=PALLD PE=1 SV=1	tr|A0A287BPI5|A0A287BPI5_PIG	109630		-5.3	SPAGHPHGR	RT: 37.55
iNS15-R2-1_SW_RB6_01_8020	Palladin isoform X4 OS=Sus scrofa OX=9823 GN=PALLD PE=1 SV=1	tr|A0A287BPI5|A0A287BPI5_PIG	45847		0.8	SRDSADESEPIQER	RT: 46.81
iNS15-R2-1_SW_RB6_01_8020	Palladin isoform X4 OS=Sus scrofa OX=9823 GN=PALLD PE=1 SV=1	tr|A0A287BPI5|A0A287BPI5_PIG	5111		5.7	FFRPHFLQAPGDLTVQEGKLCR	RT: 143.73
iNS15-R2-1_SW_RB6_01_8020	Palladin isoform X4 OS=Sus scrofa OX=9823 GN=PALLD PE=1 SV=1	tr|A0A287BPI5|A0A287BPI5_PIG	5111		5.7	FFRPHFLQAPGDLTVQEGKLCR	RT: 143.73
iNS15-R2-1_SW_RB6_01_8020	Palladin isoform X4 OS=Sus scrofa OX=9823 GN=PALLD PE=1 SV=1	tr|A0A287BPI5|A0A287BPI5_PIG	665		1.8	LCRMDCK	RT: 122.37
iNS15-R2-1_SW_RB6_01_8020	Palladin isoform X4 OS=Sus scrofa OX=9823 GN=PALLD PE=1 SV=1	tr|A0A287BPI5|A0A287BPI5_PIG	2622		2.6	VSGLPTPDLSWQLDGKPIRPDSAHK	RT: 159.48
iNS15-R2-1_SW_RB6_01_8020	Palladin isoform X4 OS=Sus scrofa OX=9823 GN=PALLD PE=1 SV=1	tr|A0A287BPI5|A0A287BPI5_PIG	10849		-2.6	ENGVHSLIIEPVSAR	RT: 60.25
iNS15-R2-1_SW_RB6_01_8020	Palladin isoform X4 OS=Sus scrofa OX=9823 GN=PALLD PE=1 SV=1	tr|A0A287BPI5|A0A287BPI5_PIG	32756		5.5	DAGIYTCVATNR	RT: 67.48
iNS15-R2-1_SW_RB6_01_8020	Palladin isoform X4 OS=Sus scrofa OX=9823 GN=PALLD PE=1 SV=1	tr|A0A287BPI5|A0A287BPI5_PIG	76741		-1.6	LQNTGVADGYPVR	RT: 52.79
iNS15-R2-1_SW_RB6_01_8020	Palladin isoform X4 OS=Sus scrofa OX=9823 GN=PALLD PE=1 SV=1	tr|A0A287BPI5|A0A287BPI5_PIG	144799		-9	LQNTGVADGYPVRLECR	RT: 64.28
iNS15-R2-1_SW_RB6_01_8020	Palladin isoform X4 OS=Sus scrofa OX=9823 GN=PALLD PE=1 SV=1	tr|A0A287BPI5|A0A287BPI5_PIG	228		1.8	VAGAPPPQIFWK	RT: 94.06
iNS15-R2-1_SW_RB6_01_8020	Palladin isoform X4 OS=Sus scrofa OX=9823 GN=PALLD PE=1 SV=1	tr|A0A287BPI5|A0A287BPI5_PIG	1596		-3.1	KENESLTHSTDR	RT: 78.26
iNS15-R2-1_SW_RB6_01_8020	Palladin isoform X4 OS=Sus scrofa OX=9823 GN=PALLD PE=1 SV=1	tr|A0A287BPI5|A0A287BPI5_PIG	1273		-2.5	VSMHQDSHGYVCLLIQGASK	RT: 54.25
iNS15-R2-1_SW_RB6_01_8020	Palladin isoform X4 OS=Sus scrofa OX=9823 GN=PALLD PE=1 SV=1	tr|A0A287BPI5|A0A287BPI5_PIG	101384		-6.2	NEAGIVSCTAR	RT: 33.72
iNS15-R2-1_SW_RB6_01_8020	Palladin isoform X4 OS=Sus scrofa OX=9823 GN=PALLD PE=1 SV=1	tr|A0A287BPI5|A0A287BPI5_PIG	28557		-3.5	RVRPSASR	RT: 34.36
iNS15-R2-1_SW_RB6_01_8020	Palladin isoform X4 OS=Sus scrofa OX=9823 GN=PALLD PE=1 SV=1	tr|A0A287BPI5|A0A287BPI5_PIG	380		-4.4	YAALSDQGLDIR	RT: 83.14
iNS15-R2-1_SW_RB6_01_8020	Palladin isoform X4 OS=Sus scrofa OX=9823 GN=PALLD PE=1 SV=1	tr|A0A287BPI5|A0A287BPI5_PIG	1995		0.9	AAFQPEASPSHLTLSPGLVESEDL	RT: 136.95
iNS15-R3-1_SW_RC3_01_8032	Palladin isoform X4 OS=Sus scrofa OX=9823 GN=PALLD PE=1 SV=1	tr|A0A287BPI5|A0A287BPI5_PIG	145616		4.5	SLDLARR	RT: 57.99
iNS15-R3-1_SW_RC3_01_8032	Palladin isoform X4 OS=Sus scrofa OX=9823 GN=PALLD PE=1 SV=1	tr|A0A287BPI5|A0A287BPI5_PIG	37829		-4	KPAVSPLLASPSYIR	RT: 126.07
iNS15-R3-1_SW_RC3_01_8032	Palladin isoform X4 OS=Sus scrofa OX=9823 GN=PALLD PE=1 SV=1	tr|A0A287BPI5|A0A287BPI5_PIG	39938		-3.6	KPAVSPLLASPSYIR	RT: 126.07
iNS15-R3-1_SW_RC3_01_8032	Palladin isoform X4 OS=Sus scrofa OX=9823 GN=PALLD PE=1 SV=1	tr|A0A287BPI5|A0A287BPI5_PIG	113126		0.1	APSTSAKPK	RT: 17.77
iNS15-R3-1_SW_RC3_01_8032	Palladin isoform X4 OS=Sus scrofa OX=9823 GN=PALLD PE=1 SV=1	tr|A0A287BPI5|A0A287BPI5_PIG	37544		0.7	APSTSAKPKATR	RT: 31.02
iNS15-R3-1_SW_RC3_01_8032	Palladin isoform X4 OS=Sus scrofa OX=9823 GN=PALLD PE=1 SV=1	tr|A0A287BPI5|A0A287BPI5_PIG	36594		0	APSTSAKPKATR	RT: 31.02
iNS15-R3-1_SW_RC3_01_8032	Palladin isoform X4 OS=Sus scrofa OX=9823 GN=PALLD PE=1 SV=1	tr|A0A287BPI5|A0A287BPI5_PIG	41268		2.7	HGRPGPQSQLCDK	RT: 56.74
iNS15-R3-1_SW_RC3_01_8032	Palladin isoform X4 OS=Sus scrofa OX=9823 GN=PALLD PE=1 SV=1	tr|A0A287BPI5|A0A287BPI5_PIG	67032		-1.1	AASFIEELTSIFR	RT: 45.54
iNS15-R3-1_SW_RC3_01_8032	Palladin isoform X4 OS=Sus scrofa OX=9823 GN=PALLD PE=1 SV=1	tr|A0A287BPI5|A0A287BPI5_PIG	107274		-4.7	EAAKPRNR	RT: 73.49
iNS15-R3-1_SW_RC3_01_8032	Palladin isoform X4 OS=Sus scrofa OX=9823 GN=PALLD PE=1 SV=1	tr|A0A287BPI5|A0A287BPI5_PIG	63574		4.3	SAPASQSPTGDPPEVDVEAEAK	RT: 68
iNS15-R3-1_SW_RC3_01_8032	Palladin isoform X4 OS=Sus scrofa OX=9823 GN=PALLD PE=1 SV=1	tr|A0A287BPI5|A0A287BPI5_PIG	10925		-1.9	LPVTGHHSSAAR	RT: 22.31
iNS15-R3-1_SW_RC3_01_8032	Palladin isoform X4 OS=Sus scrofa OX=9823 GN=PALLD PE=1 SV=1	tr|A0A287BPI5|A0A287BPI5_PIG	214206		4.9	SSRSPSPPPPLSAR	RT: 49.51
iNS15-R3-1_SW_RC3_01_8032	Palladin isoform X4 OS=Sus scrofa OX=9823 GN=PALLD PE=1 SV=1	tr|A0A287BPI5|A0A287BPI5_PIG	108129		-1.6	SPSPPPPLSAR	RT: 67.58
iNS15-R3-1_SW_RC3_01_8032	Palladin isoform X4 OS=Sus scrofa OX=9823 GN=PALLD PE=1 SV=1	tr|A0A287BPI5|A0A287BPI5_PIG	3287		-5	LRSQEVAEGSR	RT: 219.95
iNS15-R3-1_SW_RC3_01_8032	Palladin isoform X4 OS=Sus scrofa OX=9823 GN=PALLD PE=1 SV=1	tr|A0A287BPI5|A0A287BPI5_PIG	91466		-6	SQEVAEGSR	RT: 27.87
iNS15-R3-1_SW_RC3_01_8032	Palladin isoform X4 OS=Sus scrofa OX=9823 GN=PALLD PE=1 SV=1	tr|A0A287BPI5|A0A287BPI5_PIG	16245		-0.1	VYLECRVTGTPAPR	RT: 32.68
iNS15-R3-1_SW_RC3_01_8032	Palladin isoform X4 OS=Sus scrofa OX=9823 GN=PALLD PE=1 SV=1	tr|A0A287BPI5|A0A287BPI5_PIG	167276		0.6	VTGTPAPR	RT: 57.92
iNS15-R3-1_SW_RC3_01_8032	Palladin isoform X4 OS=Sus scrofa OX=9823 GN=PALLD PE=1 SV=1	tr|A0A287BPI5|A0A287BPI5_PIG	40299		3.4	SKPGAMPQAQK	RT: 40.6
iNS15-R3-1_SW_RC3_01_8032	Palladin isoform X4 OS=Sus scrofa OX=9823 GN=PALLD PE=1 SV=1	tr|A0A287BPI5|A0A287BPI5_PIG	41325		0	SKPGAMPQAQK	RT: 40.88
iNS15-R3-1_SW_RC3_01_8032	Palladin isoform X4 OS=Sus scrofa OX=9823 GN=PALLD PE=1 SV=1	tr|A0A287BPI5|A0A287BPI5_PIG	115368		-4.1	TTSVSLTIGSSSPK	RT: 44.15
iNS15-R3-1_SW_RC3_01_8032	Palladin isoform X4 OS=Sus scrofa OX=9823 GN=PALLD PE=1 SV=1	tr|A0A287BPI5|A0A287BPI5_PIG	18278		-3.3	ELQSIAATEGQVVVLECRVR	RT: 200.76
iNS15-R3-1_SW_RC3_01_8032	Palladin isoform X4 OS=Sus scrofa OX=9823 GN=PALLD PE=1 SV=1	tr|A0A287BPI5|A0A287BPI5_PIG	65360		-5.4	VRGAPPLQVR	RT: 44.01
iNS15-R3-1_SW_RC3_01_8032	Palladin isoform X4 OS=Sus scrofa OX=9823 GN=PALLD PE=1 SV=1	tr|A0A287BPI5|A0A287BPI5_PIG	76190		-8.1	GAPPLQVR	RT: 27.87
iNS15-R3-1_SW_RC3_01_8032	Palladin isoform X4 OS=Sus scrofa OX=9823 GN=PALLD PE=1 SV=1	tr|A0A287BPI5|A0A287BPI5_PIG	65588		2.9	QGSEIQDSPDFR	RT: 58.49
iNS15-R3-1_SW_RC3_01_8032	Palladin isoform X4 OS=Sus scrofa OX=9823 GN=PALLD PE=1 SV=1	tr|A0A287BPI5|A0A287BPI5_PIG	36309		-1.7	ILQKKPR	RT: 30.44
iNS15-R3-1_SW_RC3_01_8032	Palladin isoform X4 OS=Sus scrofa OX=9823 GN=PALLD PE=1 SV=1	tr|A0A287BPI5|A0A287BPI5_PIG	17518		-4.6	EPNGVHASHGHGMNGLVNGK	RT: 105.85
iNS15-R3-1_SW_RC3_01_8032	Palladin isoform X4 OS=Sus scrofa OX=9823 GN=PALLD PE=1 SV=1	tr|A0A287BPI5|A0A287BPI5_PIG	12217		0.4	AMQASGSFSYARPK	RT: 88.3
iNS15-R3-1_SW_RC3_01_8032	Palladin isoform X4 OS=Sus scrofa OX=9823 GN=PALLD PE=1 SV=1	tr|A0A287BPI5|A0A287BPI5_PIG	33269		-1.2	QFIAAQSLSPGSPASPTPPAGR	RT: 105.83
iNS15-R3-1_SW_RC3_01_8032	Palladin isoform X4 OS=Sus scrofa OX=9823 GN=PALLD PE=1 SV=1	tr|A0A287BPI5|A0A287BPI5_PIG	18316		3.9	SGPGPAPAALLCALLPSPPAAATVPTTVSALGLPR	RT: 184.31
iNS15-R3-1_SW_RC3_01_8032	Palladin isoform X4 OS=Sus scrofa OX=9823 GN=PALLD PE=1 SV=1	tr|A0A287BPI5|A0A287BPI5_PIG	4389		2.9	SGPGPAPAALLCALLPSPPAAATVPTTVSALGLPR	RT: 184.31
iNS15-R3-1_SW_RC3_01_8032	Palladin isoform X4 OS=Sus scrofa OX=9823 GN=PALLD PE=1 SV=1	tr|A0A287BPI5|A0A287BPI5_PIG	75031		0.5	AAPAAAFPK	RT: 39.49
iNS15-R3-1_SW_RC3_01_8032	Palladin isoform X4 OS=Sus scrofa OX=9823 GN=PALLD PE=1 SV=1	tr|A0A287BPI5|A0A287BPI5_PIG	55461		0	TTRMASDEEIQGSK	RT: 56.74
iNS15-R3-1_SW_RC3_01_8032	Palladin isoform X4 OS=Sus scrofa OX=9823 GN=PALLD PE=1 SV=1	tr|A0A287BPI5|A0A287BPI5_PIG	51528		-0.4	TTRMASDEEIQGSK	RT: 82.68
iNS15-R3-1_SW_RC3_01_8032	Palladin isoform X4 OS=Sus scrofa OX=9823 GN=PALLD PE=1 SV=1	tr|A0A287BPI5|A0A287BPI5_PIG	31103		-0.9	MASDEEIQGSKDAVIQDLER	RT: 82.89
iNS15-R3-1_SW_RC3_01_8032	Palladin isoform X4 OS=Sus scrofa OX=9823 GN=PALLD PE=1 SV=1	tr|A0A287BPI5|A0A287BPI5_PIG	59090		-7.5	DAVIQDLER	RT: 61.27
iNS15-R3-1_SW_RC3_01_8032	Palladin isoform X4 OS=Sus scrofa OX=9823 GN=PALLD PE=1 SV=1	tr|A0A287BPI5|A0A287BPI5_PIG	58311		-4.6	FKEDLLNNGQPR	RT: 44.01
iNS15-R3-1_SW_RC3_01_8032	Palladin isoform X4 OS=Sus scrofa OX=9823 GN=PALLD PE=1 SV=1	tr|A0A287BPI5|A0A287BPI5_PIG	77102		-5.6	EDLLNNGQPR	RT: 61.27
iNS15-R3-1_SW_RC3_01_8032	Palladin isoform X4 OS=Sus scrofa OX=9823 GN=PALLD PE=1 SV=1	tr|A0A287BPI5|A0A287BPI5_PIG	56791		-2.4	LTYEERMAR	RT: 37.89
iNS15-R3-1_SW_RC3_01_8032	Palladin isoform X4 OS=Sus scrofa OX=9823 GN=PALLD PE=1 SV=1	tr|A0A287BPI5|A0A287BPI5_PIG	70946		-6.8	VSSCEQR	RT: 78.43
iNS15-R3-1_SW_RC3_01_8032	Palladin isoform X4 OS=Sus scrofa OX=9823 GN=PALLD PE=1 SV=1	tr|A0A287BPI5|A0A287BPI5_PIG	57608		-4.5	VFEGMPVTFMCR	RT: 53.07
iNS15-R3-1_SW_RC3_01_8032	Palladin isoform X4 OS=Sus scrofa OX=9823 GN=PALLD PE=1 SV=1	tr|A0A287BPI5|A0A287BPI5_PIG	77349		-6.3	VFEGMPVTFMCR	RT: 61.27
iNS15-R3-1_SW_RC3_01_8032	Palladin isoform X4 OS=Sus scrofa OX=9823 GN=PALLD PE=1 SV=1	tr|A0A287BPI5|A0A287BPI5_PIG	86051		-6.3	VFEGMPVTFMCR	RT: 61.27
iNS15-R3-1_SW_RC3_01_8032	Palladin isoform X4 OS=Sus scrofa OX=9823 GN=PALLD PE=1 SV=1	tr|A0A287BPI5|A0A287BPI5_PIG	8892		-2.9	VFEGMPVTFMCRVTGNPKPK	RT: 140.16
iNS15-R3-1_SW_RC3_01_8032	Palladin isoform X4 OS=Sus scrofa OX=9823 GN=PALLD PE=1 SV=1	tr|A0A287BPI5|A0A287BPI5_PIG	124412		4.5	VTGNPKPK	RT: 57.71
iNS15-R3-1_SW_RC3_01_8032	Palladin isoform X4 OS=Sus scrofa OX=9823 GN=PALLD PE=1 SV=1	tr|A0A287BPI5|A0A287BPI5_PIG	64391		-0.5	DGKQVSPR	RT: 58.96
iNS15-R3-1_SW_RC3_01_8032	Palladin isoform X4 OS=Sus scrofa OX=9823 GN=PALLD PE=1 SV=1	tr|A0A287BPI5|A0A287BPI5_PIG	112195		-3	LMVQAVNQR	RT: 74.61
iNS15-R3-1_SW_RC3_01_8032	Palladin isoform X4 OS=Sus scrofa OX=9823 GN=PALLD PE=1 SV=1	tr|A0A287BPI5|A0A287BPI5_PIG	29108		-3	LMVQAVNQR	RT: 32.75
iNS15-R3-1_SW_RC3_01_8032	Palladin isoform X4 OS=Sus scrofa OX=9823 GN=PALLD PE=1 SV=1	tr|A0A287BPI5|A0A287BPI5_PIG	44764		-1.9	LMVQAVNQRGR	RT: 79.9
iNS15-R3-1_SW_RC3_01_8032	Palladin isoform X4 OS=Sus scrofa OX=9823 GN=PALLD PE=1 SV=1	tr|A0A287BPI5|A0A287BPI5_PIG	97261		-1.1	LMVQAVNQRGR	RT: 53.89
iNS15-R3-1_SW_RC3_01_8032	Palladin isoform X4 OS=Sus scrofa OX=9823 GN=PALLD PE=1 SV=1	tr|A0A287BPI5|A0A287BPI5_PIG	36594		4.3	SPRSPAGHPHGR	RT: 35.59
iNS15-R3-1_SW_RC3_01_8032	Palladin isoform X4 OS=Sus scrofa OX=9823 GN=PALLD PE=1 SV=1	tr|A0A287BPI5|A0A287BPI5_PIG	97603		-2.6	SPAGHPHGR	RT: 44.01
iNS15-R3-1_SW_RC3_01_8032	Palladin isoform X4 OS=Sus scrofa OX=9823 GN=PALLD PE=1 SV=1	tr|A0A287BPI5|A0A287BPI5_PIG	105906		-2	SRDSADESEPIQER	RT: 45.35
iNS15-R3-1_SW_RC3_01_8032	Palladin isoform X4 OS=Sus scrofa OX=9823 GN=PALLD PE=1 SV=1	tr|A0A287BPI5|A0A287BPI5_PIG	42332		-7.4	FFRPHFLQAPGDLTVQEGKLCR	RT: 126.62
iNS15-R3-1_SW_RC3_01_8032	Palladin isoform X4 OS=Sus scrofa OX=9823 GN=PALLD PE=1 SV=1	tr|A0A287BPI5|A0A287BPI5_PIG	42845		-6.6	FFRPHFLQAPGDLTVQEGKLCR	RT: 126.62
iNS15-R3-1_SW_RC3_01_8032	Palladin isoform X4 OS=Sus scrofa OX=9823 GN=PALLD PE=1 SV=1	tr|A0A287BPI5|A0A287BPI5_PIG	20216		1.5	LCRMDCK	RT: 124.04
iNS15-R3-1_SW_RC3_01_8032	Palladin isoform X4 OS=Sus scrofa OX=9823 GN=PALLD PE=1 SV=1	tr|A0A287BPI5|A0A287BPI5_PIG	92720		-5.5	VSGLPTPDLSWQLDGKPIRPDSAHK	RT: 160.74
iNS15-R3-1_SW_RC3_01_8032	Palladin isoform X4 OS=Sus scrofa OX=9823 GN=PALLD PE=1 SV=1	tr|A0A287BPI5|A0A287BPI5_PIG	105887		2.1	ENGVHSLIIEPVSAR	RT: 65.98
iNS15-R3-1_SW_RC3_01_8032	Palladin isoform X4 OS=Sus scrofa OX=9823 GN=PALLD PE=1 SV=1	tr|A0A287BPI5|A0A287BPI5_PIG	45068		-4.1	DAGIYTCVATNR	RT: 68.9
iNS15-R3-1_SW_RC3_01_8032	Palladin isoform X4 OS=Sus scrofa OX=9823 GN=PALLD PE=1 SV=1	tr|A0A287BPI5|A0A287BPI5_PIG	52915		-6	LQNTGVADGYPVR	RT: 69.11
iNS15-R3-1_SW_RC3_01_8032	Palladin isoform X4 OS=Sus scrofa OX=9823 GN=PALLD PE=1 SV=1	tr|A0A287BPI5|A0A287BPI5_PIG	79553		-6	LQNTGVADGYPVRLECR	RT: 73.5
iNS15-R3-1_SW_RC3_01_8032	Palladin isoform X4 OS=Sus scrofa OX=9823 GN=PALLD PE=1 SV=1	tr|A0A287BPI5|A0A287BPI5_PIG	26049		-0.5	VAGAPPPQIFWK	RT: 94.51
iNS15-R3-1_SW_RC3_01_8032	Palladin isoform X4 OS=Sus scrofa OX=9823 GN=PALLD PE=1 SV=1	tr|A0A287BPI5|A0A287BPI5_PIG	73625		-3.3	KENESLTHSTDR	RT: 79.27
iNS15-R3-1_SW_RC3_01_8032	Palladin isoform X4 OS=Sus scrofa OX=9823 GN=PALLD PE=1 SV=1	tr|A0A287BPI5|A0A287BPI5_PIG	45524		0.8	VSMHQDSHGYVCLLIQGASK	RT: 52.22
iNS15-R3-1_SW_RC3_01_8032	Palladin isoform X4 OS=Sus scrofa OX=9823 GN=PALLD PE=1 SV=1	tr|A0A287BPI5|A0A287BPI5_PIG	37772		-6	NEAGIVSCTAR	RT: 37.9
iNS15-R3-1_SW_RC3_01_8032	Palladin isoform X4 OS=Sus scrofa OX=9823 GN=PALLD PE=1 SV=1	tr|A0A287BPI5|A0A287BPI5_PIG	24757		5.9	RVRPSASR	RT: 36.08
iNS15-R3-1_SW_RC3_01_8032	Palladin isoform X4 OS=Sus scrofa OX=9823 GN=PALLD PE=1 SV=1	tr|A0A287BPI5|A0A287BPI5_PIG	60249		-5.3	YAALSDQGLDIR	RT: 82.67
iNS15-R3-1_SW_RC3_01_8032	Palladin isoform X4 OS=Sus scrofa OX=9823 GN=PALLD PE=1 SV=1	tr|A0A287BPI5|A0A287BPI5_PIG	97945		4.4	AAFQPEASPSHLTLSPGLVESEDL	RT: 135.51
iNS7-R1-1_SW_RA8_01_8013	Palladin isoform X4 OS=Sus scrofa OX=9823 GN=PALLD PE=1 SV=1	tr|A0A287BPI5|A0A287BPI5_PIG	1635444		-4.8	SLDLARR	RT: 68.4
iNS7-R1-1_SW_RA8_01_8013	Palladin isoform X4 OS=Sus scrofa OX=9823 GN=PALLD PE=1 SV=1	tr|A0A287BPI5|A0A287BPI5_PIG	828039		-6.5	KPAVSPLLASPSYIR	RT: 120.6
iNS7-R1-1_SW_RA8_01_8013	Palladin isoform X4 OS=Sus scrofa OX=9823 GN=PALLD PE=1 SV=1	tr|A0A287BPI5|A0A287BPI5_PIG	1016595		-6.1	KPAVSPLLASPSYIR	RT: 120.6
iNS7-R1-1_SW_RA8_01_8013	Palladin isoform X4 OS=Sus scrofa OX=9823 GN=PALLD PE=1 SV=1	tr|A0A287BPI5|A0A287BPI5_PIG	641060		-2.6	APSTSAKPK	RT: 17.64
iNS7-R1-1_SW_RA8_01_8013	Palladin isoform X4 OS=Sus scrofa OX=9823 GN=PALLD PE=1 SV=1	tr|A0A287BPI5|A0A287BPI5_PIG	410267		-5.8	APSTSAKPKATR	RT: 33.98
iNS7-R1-1_SW_RA8_01_8013	Palladin isoform X4 OS=Sus scrofa OX=9823 GN=PALLD PE=1 SV=1	tr|A0A287BPI5|A0A287BPI5_PIG	392369		-6.1	APSTSAKPKATR	RT: 33.98
iNS7-R1-1_SW_RA8_01_8013	Palladin isoform X4 OS=Sus scrofa OX=9823 GN=PALLD PE=1 SV=1	tr|A0A287BPI5|A0A287BPI5_PIG	54093		2.7	HGRPGPQSQLCDK	RT: 54.22
iNS7-R1-1_SW_RA8_01_8013	Palladin isoform X4 OS=Sus scrofa OX=9823 GN=PALLD PE=1 SV=1	tr|A0A287BPI5|A0A287BPI5_PIG	438235		-7.8	AASFIEELTSIFR	RT: 48.17
iNS7-R1-1_SW_RA8_01_8013	Palladin isoform X4 OS=Sus scrofa OX=9823 GN=PALLD PE=1 SV=1	tr|A0A287BPI5|A0A287BPI5_PIG	1253430		-6.3	EAAKPRNR	RT: 73.48
iNS7-R1-1_SW_RA8_01_8013	Palladin isoform X4 OS=Sus scrofa OX=9823 GN=PALLD PE=1 SV=1	tr|A0A287BPI5|A0A287BPI5_PIG	191026		1.2	SAPASQSPTGDPPEVDVEAEAK	RT: 70.84
iNS7-R1-1_SW_RA8_01_8013	Palladin isoform X4 OS=Sus scrofa OX=9823 GN=PALLD PE=1 SV=1	tr|A0A287BPI5|A0A287BPI5_PIG	47918		5.2	LPVTGHHSSAAR	RT: 27.72
iNS7-R1-1_SW_RA8_01_8013	Palladin isoform X4 OS=Sus scrofa OX=9823 GN=PALLD PE=1 SV=1	tr|A0A287BPI5|A0A287BPI5_PIG	570532		-6.4	SSRSPSPPPPLSAR	RT: 56.65
iNS7-R1-1_SW_RA8_01_8013	Palladin isoform X4 OS=Sus scrofa OX=9823 GN=PALLD PE=1 SV=1	tr|A0A287BPI5|A0A287BPI5_PIG	6414837		-6.2	SPSPPPPLSAR	RT: 84.39
iNS7-R1-1_SW_RA8_01_8013	Palladin isoform X4 OS=Sus scrofa OX=9823 GN=PALLD PE=1 SV=1	tr|A0A287BPI5|A0A287BPI5_PIG	52744		0.6	LRSQEVAEGSR	RT: 215.35
iNS7-R1-1_SW_RA8_01_8013	Palladin isoform X4 OS=Sus scrofa OX=9823 GN=PALLD PE=1 SV=1	tr|A0A287BPI5|A0A287BPI5_PIG	1161413		-5.4	SQEVAEGSR	RT: 61.03
iNS7-R1-1_SW_RA8_01_8013	Palladin isoform X4 OS=Sus scrofa OX=9823 GN=PALLD PE=1 SV=1	tr|A0A287BPI5|A0A287BPI5_PIG	279566		-3.6	VYLECRVTGTPAPR	RT: 36.21
iNS7-R1-1_SW_RA8_01_8013	Palladin isoform X4 OS=Sus scrofa OX=9823 GN=PALLD PE=1 SV=1	tr|A0A287BPI5|A0A287BPI5_PIG	2010618		-5.1	VTGTPAPR	RT: 68.47
iNS7-R1-1_SW_RA8_01_8013	Palladin isoform X4 OS=Sus scrofa OX=9823 GN=PALLD PE=1 SV=1	tr|A0A287BPI5|A0A287BPI5_PIG	22762		-2.9	SKPGAMPQAQK	RT: 40.37
iNS7-R1-1_SW_RA8_01_8013	Palladin isoform X4 OS=Sus scrofa OX=9823 GN=PALLD PE=1 SV=1	tr|A0A287BPI5|A0A287BPI5_PIG	67697		-1.6	SKPGAMPQAQK	RT: 36.49
iNS7-R1-1_SW_RA8_01_8013	Palladin isoform X4 OS=Sus scrofa OX=9823 GN=PALLD PE=1 SV=1	tr|A0A287BPI5|A0A287BPI5_PIG	156769		2.5	TTSVSLTIGSSSPK	RT: 65.27
iNS7-R1-1_SW_RA8_01_8013	Palladin isoform X4 OS=Sus scrofa OX=9823 GN=PALLD PE=1 SV=1	tr|A0A287BPI5|A0A287BPI5_PIG	52364		-2	ELQSIAATEGQVVVLECRVR	RT: 196.81
iNS7-R1-1_SW_RA8_01_8013	Palladin isoform X4 OS=Sus scrofa OX=9823 GN=PALLD PE=1 SV=1	tr|A0A287BPI5|A0A287BPI5_PIG	775922		-5.1	VRGAPPLQVR	RT: 56.65
iNS7-R1-1_SW_RA8_01_8013	Palladin isoform X4 OS=Sus scrofa OX=9823 GN=PALLD PE=1 SV=1	tr|A0A287BPI5|A0A287BPI5_PIG	2169477		-7.5	GAPPLQVR	RT: 17.63
iNS7-R1-1_SW_RA8_01_8013	Palladin isoform X4 OS=Sus scrofa OX=9823 GN=PALLD PE=1 SV=1	tr|A0A287BPI5|A0A287BPI5_PIG	244036		-5.1	QGSEIQDSPDFR	RT: 57.01
iNS7-R1-1_SW_RA8_01_8013	Palladin isoform X4 OS=Sus scrofa OX=9823 GN=PALLD PE=1 SV=1	tr|A0A287BPI5|A0A287BPI5_PIG	278350		-5.4	ILQKKPR	RT: 32.45
iNS7-R1-1_SW_RA8_01_8013	Palladin isoform X4 OS=Sus scrofa OX=9823 GN=PALLD PE=1 SV=1	tr|A0A287BPI5|A0A287BPI5_PIG	86640		-0.2	EPNGVHASHGHGMNGLVNGK	RT: 101.63
iNS7-R1-1_SW_RA8_01_8013	Palladin isoform X4 OS=Sus scrofa OX=9823 GN=PALLD PE=1 SV=1	tr|A0A287BPI5|A0A287BPI5_PIG	34333		2.3	AMQASGSFSYARPK	RT: 86.29
iNS7-R1-1_SW_RA8_01_8013	Palladin isoform X4 OS=Sus scrofa OX=9823 GN=PALLD PE=1 SV=1	tr|A0A287BPI5|A0A287BPI5_PIG	272650		-1.1	QFIAAQSLSPGSPASPTPPAGR	RT: 102.25
iNS7-R1-1_SW_RA8_01_8013	Palladin isoform X4 OS=Sus scrofa OX=9823 GN=PALLD PE=1 SV=1	tr|A0A287BPI5|A0A287BPI5_PIG	2565		-1.3	SGPGPAPAALLCALLPSPPAAATVPTTVSALGLPR	RT: 185.63
iNS7-R1-1_SW_RA8_01_8013	Palladin isoform X4 OS=Sus scrofa OX=9823 GN=PALLD PE=1 SV=1	tr|A0A287BPI5|A0A287BPI5_PIG	16606		-3.8	SGPGPAPAALLCALLPSPPAAATVPTTVSALGLPR	RT: 185.63
iNS7-R1-1_SW_RA8_01_8013	Palladin isoform X4 OS=Sus scrofa OX=9823 GN=PALLD PE=1 SV=1	tr|A0A287BPI5|A0A287BPI5_PIG	126977		-2.7	AAPAAAFPK	RT: 39.75
iNS7-R1-1_SW_RA8_01_8013	Palladin isoform X4 OS=Sus scrofa OX=9823 GN=PALLD PE=1 SV=1	tr|A0A287BPI5|A0A287BPI5_PIG	52174		1.6	TTRMASDEEIQGSK	RT: 57.28
iNS7-R1-1_SW_RA8_01_8013	Palladin isoform X4 OS=Sus scrofa OX=9823 GN=PALLD PE=1 SV=1	tr|A0A287BPI5|A0A287BPI5_PIG	77235		1.8	TTRMASDEEIQGSK	RT: 81.56
iNS7-R1-1_SW_RA8_01_8013	Palladin isoform X4 OS=Sus scrofa OX=9823 GN=PALLD PE=1 SV=1	tr|A0A287BPI5|A0A287BPI5_PIG	37373		1.7	MASDEEIQGSKDAVIQDLER	RT: 81.47
iNS7-R1-1_SW_RA8_01_8013	Palladin isoform X4 OS=Sus scrofa OX=9823 GN=PALLD PE=1 SV=1	tr|A0A287BPI5|A0A287BPI5_PIG	1630333		-7.6	DAVIQDLER	RT: 64.43
iNS7-R1-1_SW_RA8_01_8013	Palladin isoform X4 OS=Sus scrofa OX=9823 GN=PALLD PE=1 SV=1	tr|A0A287BPI5|A0A287BPI5_PIG	383686		-1.3	FKEDLLNNGQPR	RT: 49.43
iNS7-R1-1_SW_RA8_01_8013	Palladin isoform X4 OS=Sus scrofa OX=9823 GN=PALLD PE=1 SV=1	tr|A0A287BPI5|A0A287BPI5_PIG	1024423		-8.4	EDLLNNGQPR	RT: 64.71
iNS7-R1-1_SW_RA8_01_8013	Palladin isoform X4 OS=Sus scrofa OX=9823 GN=PALLD PE=1 SV=1	tr|A0A287BPI5|A0A287BPI5_PIG	335711		-4.1	LTYEERMAR	RT: 36.55
iNS7-R1-1_SW_RA8_01_8013	Palladin isoform X4 OS=Sus scrofa OX=9823 GN=PALLD PE=1 SV=1	tr|A0A287BPI5|A0A287BPI5_PIG	747821		-3.9	VSSCEQR	RT: 80.78
iNS7-R1-1_SW_RA8_01_8013	Palladin isoform X4 OS=Sus scrofa OX=9823 GN=PALLD PE=1 SV=1	tr|A0A287BPI5|A0A287BPI5_PIG	560994		-4.4	VFEGMPVTFMCR	RT: 53.04
iNS7-R1-1_SW_RA8_01_8013	Palladin isoform X4 OS=Sus scrofa OX=9823 GN=PALLD PE=1 SV=1	tr|A0A287BPI5|A0A287BPI5_PIG	1460359		-6.3	VFEGMPVTFMCR	RT: 68.4
iNS7-R1-1_SW_RA8_01_8013	Palladin isoform X4 OS=Sus scrofa OX=9823 GN=PALLD PE=1 SV=1	tr|A0A287BPI5|A0A287BPI5_PIG	1538088		-5.9	VFEGMPVTFMCR	RT: 68.4
iNS7-R1-1_SW_RA8_01_8013	Palladin isoform X4 OS=Sus scrofa OX=9823 GN=PALLD PE=1 SV=1	tr|A0A287BPI5|A0A287BPI5_PIG	24909		-0.9	VFEGMPVTFMCRVTGNPKPK	RT: 142.5
iNS7-R1-1_SW_RA8_01_8013	Palladin isoform X4 OS=Sus scrofa OX=9823 GN=PALLD PE=1 SV=1	tr|A0A287BPI5|A0A287BPI5_PIG	516857		-8.5	VTGNPKPK	RT: 66.8
iNS7-R1-1_SW_RA8_01_8013	Palladin isoform X4 OS=Sus scrofa OX=9823 GN=PALLD PE=1 SV=1	tr|A0A287BPI5|A0A287BPI5_PIG	1355346		-8.1	DGKQVSPR	RT: 64.64
iNS7-R1-1_SW_RA8_01_8013	Palladin isoform X4 OS=Sus scrofa OX=9823 GN=PALLD PE=1 SV=1	tr|A0A287BPI5|A0A287BPI5_PIG	1126111		-6.9	LMVQAVNQR	RT: 72.3
iNS7-R1-1_SW_RA8_01_8013	Palladin isoform X4 OS=Sus scrofa OX=9823 GN=PALLD PE=1 SV=1	tr|A0A287BPI5|A0A287BPI5_PIG	468844		-5.8	LMVQAVNQR	RT: 33.98
iNS7-R1-1_SW_RA8_01_8013	Palladin isoform X4 OS=Sus scrofa OX=9823 GN=PALLD PE=1 SV=1	tr|A0A287BPI5|A0A287BPI5_PIG	714476		-3.5	LMVQAVNQRGR	RT: 80.78
iNS7-R1-1_SW_RA8_01_8013	Palladin isoform X4 OS=Sus scrofa OX=9823 GN=PALLD PE=1 SV=1	tr|A0A287BPI5|A0A287BPI5_PIG	1279023		-6.5	LMVQAVNQRGR	RT: 67.01
iNS7-R1-1_SW_RA8_01_8013	Palladin isoform X4 OS=Sus scrofa OX=9823 GN=PALLD PE=1 SV=1	tr|A0A287BPI5|A0A287BPI5_PIG	328320		-2.3	SPRSPAGHPHGR	RT: 36.42
iNS7-R1-1_SW_RA8_01_8013	Palladin isoform X4 OS=Sus scrofa OX=9823 GN=PALLD PE=1 SV=1	tr|A0A287BPI5|A0A287BPI5_PIG	2385507		-6.1	SPAGHPHGR	RT: 17.63
iNS7-R1-1_SW_RA8_01_8013	Palladin isoform X4 OS=Sus scrofa OX=9823 GN=PALLD PE=1 SV=1	tr|A0A287BPI5|A0A287BPI5_PIG	330353		-1.2	SRDSADESEPIQER	RT: 41.14
iNS7-R1-1_SW_RA8_01_8013	Palladin isoform X4 OS=Sus scrofa OX=9823 GN=PALLD PE=1 SV=1	tr|A0A287BPI5|A0A287BPI5_PIG	495159		-5.2	FFRPHFLQAPGDLTVQEGKLCR	RT: 132
iNS7-R1-1_SW_RA8_01_8013	Palladin isoform X4 OS=Sus scrofa OX=9823 GN=PALLD PE=1 SV=1	tr|A0A287BPI5|A0A287BPI5_PIG	498959		-5.1	FFRPHFLQAPGDLTVQEGKLCR	RT: 132
iNS7-R1-1_SW_RA8_01_8013	Palladin isoform X4 OS=Sus scrofa OX=9823 GN=PALLD PE=1 SV=1	tr|A0A287BPI5|A0A287BPI5_PIG	26144		-4.5	LCRMDCK	RT: 126.59
iNS7-R1-1_SW_RA8_01_8013	Palladin isoform X4 OS=Sus scrofa OX=9823 GN=PALLD PE=1 SV=1	tr|A0A287BPI5|A0A287BPI5_PIG	24795		1.9	VSGLPTPDLSWQLDGKPIRPDSAHK	RT: 160.21
iNS7-R1-1_SW_RA8_01_8013	Palladin isoform X4 OS=Sus scrofa OX=9823 GN=PALLD PE=1 SV=1	tr|A0A287BPI5|A0A287BPI5_PIG	840978		-6.1	ENGVHSLIIEPVSAR	RT: 61.1
iNS7-R1-1_SW_RA8_01_8013	Palladin isoform X4 OS=Sus scrofa OX=9823 GN=PALLD PE=1 SV=1	tr|A0A287BPI5|A0A287BPI5_PIG	1095464		-7	DAGIYTCVATNR	RT: 65.55
iNS7-R1-1_SW_RA8_01_8013	Palladin isoform X4 OS=Sus scrofa OX=9823 GN=PALLD PE=1 SV=1	tr|A0A287BPI5|A0A287BPI5_PIG	2113921		-8.6	LQNTGVADGYPVR	RT: 84.8
iNS7-R1-1_SW_RA8_01_8013	Palladin isoform X4 OS=Sus scrofa OX=9823 GN=PALLD PE=1 SV=1	tr|A0A287BPI5|A0A287BPI5_PIG	1155181		-8	LQNTGVADGYPVRLECR	RT: 68.05
iNS7-R1-1_SW_RA8_01_8013	Palladin isoform X4 OS=Sus scrofa OX=9823 GN=PALLD PE=1 SV=1	tr|A0A287BPI5|A0A287BPI5_PIG	252871		2.2	VAGAPPPQIFWK	RT: 94.4
iNS7-R1-1_SW_RA8_01_8013	Palladin isoform X4 OS=Sus scrofa OX=9823 GN=PALLD PE=1 SV=1	tr|A0A287BPI5|A0A287BPI5_PIG	651700		-4.1	KENESLTHSTDR	RT: 79.94
iNS7-R1-1_SW_RA8_01_8013	Palladin isoform X4 OS=Sus scrofa OX=9823 GN=PALLD PE=1 SV=1	tr|A0A287BPI5|A0A287BPI5_PIG	48127		-2	VSMHQDSHGYVCLLIQGASK	RT: 56.59
iNS7-R1-1_SW_RA8_01_8013	Palladin isoform X4 OS=Sus scrofa OX=9823 GN=PALLD PE=1 SV=1	tr|A0A287BPI5|A0A287BPI5_PIG	302784		-2.1	NEAGIVSCTAR	RT: 36.35
iNS7-R1-1_SW_RA8_01_8013	Palladin isoform X4 OS=Sus scrofa OX=9823 GN=PALLD PE=1 SV=1	tr|A0A287BPI5|A0A287BPI5_PIG	481327		-4.1	RVRPSASR	RT: 34.4
iNS7-R1-1_SW_RA8_01_8013	Palladin isoform X4 OS=Sus scrofa OX=9823 GN=PALLD PE=1 SV=1	tr|A0A287BPI5|A0A287BPI5_PIG	148295		3.2	YAALSDQGLDIR	RT: 80.92
iNS7-R1-1_SW_RA8_01_8013	Palladin isoform X4 OS=Sus scrofa OX=9823 GN=PALLD PE=1 SV=1	tr|A0A287BPI5|A0A287BPI5_PIG	80294		-1.7	AAFQPEASPSHLTLSPGLVESEDL	RT: 137.35
iNS7-R2-1_SW_RB5_01_8019	Palladin isoform X4 OS=Sus scrofa OX=9823 GN=PALLD PE=1 SV=1	tr|A0A287BPI5|A0A287BPI5_PIG	815024		-4.9	SLDLARR	RT: 53.06
iNS7-R2-1_SW_RB5_01_8019	Palladin isoform X4 OS=Sus scrofa OX=9823 GN=PALLD PE=1 SV=1	tr|A0A287BPI5|A0A287BPI5_PIG	351728		-5.9	KPAVSPLLASPSYIR	RT: 87.2
iNS7-R2-1_SW_RB5_01_8019	Palladin isoform X4 OS=Sus scrofa OX=9823 GN=PALLD PE=1 SV=1	tr|A0A287BPI5|A0A287BPI5_PIG	351994		-5.9	KPAVSPLLASPSYIR	RT: 87.2
iNS7-R2-1_SW_RB5_01_8019	Palladin isoform X4 OS=Sus scrofa OX=9823 GN=PALLD PE=1 SV=1	tr|A0A287BPI5|A0A287BPI5_PIG	197220		-1.5	APSTSAKPK	RT: 17.77
iNS7-R2-1_SW_RB5_01_8019	Palladin isoform X4 OS=Sus scrofa OX=9823 GN=PALLD PE=1 SV=1	tr|A0A287BPI5|A0A287BPI5_PIG	427329		-7.2	APSTSAKPKATR	RT: 50.13
iNS7-R2-1_SW_RB5_01_8019	Palladin isoform X4 OS=Sus scrofa OX=9823 GN=PALLD PE=1 SV=1	tr|A0A287BPI5|A0A287BPI5_PIG	425353		-7.3	APSTSAKPKATR	RT: 50.13
iNS7-R2-1_SW_RB5_01_8019	Palladin isoform X4 OS=Sus scrofa OX=9823 GN=PALLD PE=1 SV=1	tr|A0A287BPI5|A0A287BPI5_PIG	53770		-2.5	HGRPGPQSQLCDK	RT: 57.09
iNS7-R2-1_SW_RB5_01_8019	Palladin isoform X4 OS=Sus scrofa OX=9823 GN=PALLD PE=1 SV=1	tr|A0A287BPI5|A0A287BPI5_PIG	300846		-7.4	AASFIEELTSIFR	RT: 42.55
iNS7-R2-1_SW_RB5_01_8019	Palladin isoform X4 OS=Sus scrofa OX=9823 GN=PALLD PE=1 SV=1	tr|A0A287BPI5|A0A287BPI5_PIG	121011		-4	EAAKPRNR	RT: 75.04
iNS7-R2-1_SW_RB5_01_8019	Palladin isoform X4 OS=Sus scrofa OX=9823 GN=PALLD PE=1 SV=1	tr|A0A287BPI5|A0A287BPI5_PIG	195681		2.2	SAPASQSPTGDPPEVDVEAEAK	RT: 70.87
iNS7-R2-1_SW_RB5_01_8019	Palladin isoform X4 OS=Sus scrofa OX=9823 GN=PALLD PE=1 SV=1	tr|A0A287BPI5|A0A287BPI5_PIG	78508		-4.3	LPVTGHHSSAAR	RT: 26.34
iNS7-R2-1_SW_RB5_01_8019	Palladin isoform X4 OS=Sus scrofa OX=9823 GN=PALLD PE=1 SV=1	tr|A0A287BPI5|A0A287BPI5_PIG	952432		-6.3	SSRSPSPPPPLSAR	RT: 52.85
iNS7-R2-1_SW_RB5_01_8019	Palladin isoform X4 OS=Sus scrofa OX=9823 GN=PALLD PE=1 SV=1	tr|A0A287BPI5|A0A287BPI5_PIG	421952		-7.8	SPSPPPPLSAR	RT: 77.05
iNS7-R2-1_SW_RB5_01_8019	Palladin isoform X4 OS=Sus scrofa OX=9823 GN=PALLD PE=1 SV=1	tr|A0A287BPI5|A0A287BPI5_PIG	1064		-0.6	LRSQEVAEGSR	RT: 218.04
iNS7-R2-1_SW_RB5_01_8019	Palladin isoform X4 OS=Sus scrofa OX=9823 GN=PALLD PE=1 SV=1	tr|A0A287BPI5|A0A287BPI5_PIG	563046		-5	SQEVAEGSR	RT: 50.13
iNS7-R2-1_SW_RB5_01_8019	Palladin isoform X4 OS=Sus scrofa OX=9823 GN=PALLD PE=1 SV=1	tr|A0A287BPI5|A0A287BPI5_PIG	191387		-4.5	VYLECRVTGTPAPR	RT: 36.22
iNS7-R2-1_SW_RB5_01_8019	Palladin isoform X4 OS=Sus scrofa OX=9823 GN=PALLD PE=1 SV=1	tr|A0A287BPI5|A0A287BPI5_PIG	1011560		-6.7	VTGTPAPR	RT: 52.85
iNS7-R2-1_SW_RB5_01_8019	Palladin isoform X4 OS=Sus scrofa OX=9823 GN=PALLD PE=1 SV=1	tr|A0A287BPI5|A0A287BPI5_PIG	46094		3.3	SKPGAMPQAQK	RT: 42.62
iNS7-R2-1_SW_RB5_01_8019	Palladin isoform X4 OS=Sus scrofa OX=9823 GN=PALLD PE=1 SV=1	tr|A0A287BPI5|A0A287BPI5_PIG	68153		0.4	SKPGAMPQAQK	RT: 41.16
iNS7-R2-1_SW_RB5_01_8019	Palladin isoform X4 OS=Sus scrofa OX=9823 GN=PALLD PE=1 SV=1	tr|A0A287BPI5|A0A287BPI5_PIG	329251		3.7	TTSVSLTIGSSSPK	RT: 52.86
iNS7-R2-1_SW_RB5_01_8019	Palladin isoform X4 OS=Sus scrofa OX=9823 GN=PALLD PE=1 SV=1	tr|A0A287BPI5|A0A287BPI5_PIG	4484		-2	ELQSIAATEGQVVVLECRVR	RT: 200.48
iNS7-R2-1_SW_RB5_01_8019	Palladin isoform X4 OS=Sus scrofa OX=9823 GN=PALLD PE=1 SV=1	tr|A0A287BPI5|A0A287BPI5_PIG	569696		-5.1	VRGAPPLQVR	RT: 48.53
iNS7-R2-1_SW_RB5_01_8019	Palladin isoform X4 OS=Sus scrofa OX=9823 GN=PALLD PE=1 SV=1	tr|A0A287BPI5|A0A287BPI5_PIG	1506491		-5.1	GAPPLQVR	RT: 17.71
iNS7-R2-1_SW_RB5_01_8019	Palladin isoform X4 OS=Sus scrofa OX=9823 GN=PALLD PE=1 SV=1	tr|A0A287BPI5|A0A287BPI5_PIG	174059		-1.3	QGSEIQDSPDFR	RT: 54.04
iNS7-R2-1_SW_RB5_01_8019	Palladin isoform X4 OS=Sus scrofa OX=9823 GN=PALLD PE=1 SV=1	tr|A0A287BPI5|A0A287BPI5_PIG	256044		-7.2	ILQKKPR	RT: 33.78
iNS7-R2-1_SW_RB5_01_8019	Palladin isoform X4 OS=Sus scrofa OX=9823 GN=PALLD PE=1 SV=1	tr|A0A287BPI5|A0A287BPI5_PIG	893		0.2	EPNGVHASHGHGMNGLVNGK	RT: 105.64
iNS7-R2-1_SW_RB5_01_8019	Palladin isoform X4 OS=Sus scrofa OX=9823 GN=PALLD PE=1 SV=1	tr|A0A287BPI5|A0A287BPI5_PIG	39045		4.8	AMQASGSFSYARPK	RT: 87.35
iNS7-R2-1_SW_RB5_01_8019	Palladin isoform X4 OS=Sus scrofa OX=9823 GN=PALLD PE=1 SV=1	tr|A0A287BPI5|A0A287BPI5_PIG	37658		-4.1	QFIAAQSLSPGSPASPTPPAGR	RT: 98.89
iNS7-R2-1_SW_RB5_01_8019	Palladin isoform X4 OS=Sus scrofa OX=9823 GN=PALLD PE=1 SV=1	tr|A0A287BPI5|A0A287BPI5_PIG	2926		1.2	SGPGPAPAALLCALLPSPPAAATVPTTVSALGLPR	RT: 184.17
iNS7-R2-1_SW_RB5_01_8019	Palladin isoform X4 OS=Sus scrofa OX=9823 GN=PALLD PE=1 SV=1	tr|A0A287BPI5|A0A287BPI5_PIG	1026		1.5	SGPGPAPAALLCALLPSPPAAATVPTTVSALGLPR	RT: 184.17
iNS7-R2-1_SW_RB5_01_8019	Palladin isoform X4 OS=Sus scrofa OX=9823 GN=PALLD PE=1 SV=1	tr|A0A287BPI5|A0A287BPI5_PIG	178676		-6.2	AAPAAAFPK	RT: 43.04
iNS7-R2-1_SW_RB5_01_8019	Palladin isoform X4 OS=Sus scrofa OX=9823 GN=PALLD PE=1 SV=1	tr|A0A287BPI5|A0A287BPI5_PIG	48013		-3.8	TTRMASDEEIQGSK	RT: 57.37
iNS7-R2-1_SW_RB5_01_8019	Palladin isoform X4 OS=Sus scrofa OX=9823 GN=PALLD PE=1 SV=1	tr|A0A287BPI5|A0A287BPI5_PIG	54663		-2.1	TTRMASDEEIQGSK	RT: 77.68
iNS7-R2-1_SW_RB5_01_8019	Palladin isoform X4 OS=Sus scrofa OX=9823 GN=PALLD PE=1 SV=1	tr|A0A287BPI5|A0A287BPI5_PIG	28196		-0.1	MASDEEIQGSKDAVIQDLER	RT: 81.72
iNS7-R2-1_SW_RB5_01_8019	Palladin isoform X4 OS=Sus scrofa OX=9823 GN=PALLD PE=1 SV=1	tr|A0A287BPI5|A0A287BPI5_PIG	303411		-3.6	DAVIQDLER	RT: 65.17
iNS7-R2-1_SW_RB5_01_8019	Palladin isoform X4 OS=Sus scrofa OX=9823 GN=PALLD PE=1 SV=1	tr|A0A287BPI5|A0A287BPI5_PIG	361323		-5.8	FKEDLLNNGQPR	RT: 42.55
iNS7-R2-1_SW_RB5_01_8019	Palladin isoform X4 OS=Sus scrofa OX=9823 GN=PALLD PE=1 SV=1	tr|A0A287BPI5|A0A287BPI5_PIG	641155		-4.1	EDLLNNGQPR	RT: 52.94
iNS7-R2-1_SW_RB5_01_8019	Palladin isoform X4 OS=Sus scrofa OX=9823 GN=PALLD PE=1 SV=1	tr|A0A287BPI5|A0A287BPI5_PIG	424650		-5.7	LTYEERMAR	RT: 38.72
iNS7-R2-1_SW_RB5_01_8019	Palladin isoform X4 OS=Sus scrofa OX=9823 GN=PALLD PE=1 SV=1	tr|A0A287BPI5|A0A287BPI5_PIG	259863		-4.2	VSSCEQR	RT: 78.37
iNS7-R2-1_SW_RB5_01_8019	Palladin isoform X4 OS=Sus scrofa OX=9823 GN=PALLD PE=1 SV=1	tr|A0A287BPI5|A0A287BPI5_PIG	1659270		-6.7	VFEGMPVTFMCR	RT: 52.86
iNS7-R2-1_SW_RB5_01_8019	Palladin isoform X4 OS=Sus scrofa OX=9823 GN=PALLD PE=1 SV=1	tr|A0A287BPI5|A0A287BPI5_PIG	684760		-5.8	VFEGMPVTFMCR	RT: 48.39
iNS7-R2-1_SW_RB5_01_8019	Palladin isoform X4 OS=Sus scrofa OX=9823 GN=PALLD PE=1 SV=1	tr|A0A287BPI5|A0A287BPI5_PIG	641953		-6.4	VFEGMPVTFMCR	RT: 48.39
iNS7-R2-1_SW_RB5_01_8019	Palladin isoform X4 OS=Sus scrofa OX=9823 GN=PALLD PE=1 SV=1	tr|A0A287BPI5|A0A287BPI5_PIG	3002		-1.6	VFEGMPVTFMCRVTGNPKPK	RT: 140.25
iNS7-R2-1_SW_RB5_01_8019	Palladin isoform X4 OS=Sus scrofa OX=9823 GN=PALLD PE=1 SV=1	tr|A0A287BPI5|A0A287BPI5_PIG	248577		-5.5	VTGNPKPK	RT: 55.84
iNS7-R2-1_SW_RB5_01_8019	Palladin isoform X4 OS=Sus scrofa OX=9823 GN=PALLD PE=1 SV=1	tr|A0A287BPI5|A0A287BPI5_PIG	1105287		-5.7	DGKQVSPR	RT: 53.06
iNS7-R2-1_SW_RB5_01_8019	Palladin isoform X4 OS=Sus scrofa OX=9823 GN=PALLD PE=1 SV=1	tr|A0A287BPI5|A0A287BPI5_PIG	231344		-5.7	LMVQAVNQR	RT: 76.08
iNS7-R2-1_SW_RB5_01_8019	Palladin isoform X4 OS=Sus scrofa OX=9823 GN=PALLD PE=1 SV=1	tr|A0A287BPI5|A0A287BPI5_PIG	417202		-6.6	LMVQAVNQR	RT: 35.53
iNS7-R2-1_SW_RB5_01_8019	Palladin isoform X4 OS=Sus scrofa OX=9823 GN=PALLD PE=1 SV=1	tr|A0A287BPI5|A0A287BPI5_PIG	192603		-3.8	LMVQAVNQRGR	RT: 81.15
iNS7-R2-1_SW_RB5_01_8019	Palladin isoform X4 OS=Sus scrofa OX=9823 GN=PALLD PE=1 SV=1	tr|A0A287BPI5|A0A287BPI5_PIG	790343		-4.4	LMVQAVNQRGR	RT: 52.92
iNS7-R2-1_SW_RB5_01_8019	Palladin isoform X4 OS=Sus scrofa OX=9823 GN=PALLD PE=1 SV=1	tr|A0A287BPI5|A0A287BPI5_PIG	240122		-2.7	SPRSPAGHPHGR	RT: 36.22
iNS7-R2-1_SW_RB5_01_8019	Palladin isoform X4 OS=Sus scrofa OX=9823 GN=PALLD PE=1 SV=1	tr|A0A287BPI5|A0A287BPI5_PIG	1947842		-4.9	SPAGHPHGR	RT: 17.63
iNS7-R2-1_SW_RB5_01_8019	Palladin isoform X4 OS=Sus scrofa OX=9823 GN=PALLD PE=1 SV=1	tr|A0A287BPI5|A0A287BPI5_PIG	581229		-6	SRDSADESEPIQER	RT: 43.04
iNS7-R2-1_SW_RB5_01_8019	Palladin isoform X4 OS=Sus scrofa OX=9823 GN=PALLD PE=1 SV=1	tr|A0A287BPI5|A0A287BPI5_PIG	15143		-4.3	FFRPHFLQAPGDLTVQEGKLCR	RT: 147.09
iNS7-R2-1_SW_RB5_01_8019	Palladin isoform X4 OS=Sus scrofa OX=9823 GN=PALLD PE=1 SV=1	tr|A0A287BPI5|A0A287BPI5_PIG	16093		-4.1	FFRPHFLQAPGDLTVQEGKLCR	RT: 147.09
iNS7-R2-1_SW_RB5_01_8019	Palladin isoform X4 OS=Sus scrofa OX=9823 GN=PALLD PE=1 SV=1	tr|A0A287BPI5|A0A287BPI5_PIG	855		1.5	LCRMDCK	RT: 125.31
iNS7-R2-1_SW_RB5_01_8019	Palladin isoform X4 OS=Sus scrofa OX=9823 GN=PALLD PE=1 SV=1	tr|A0A287BPI5|A0A287BPI5_PIG	1634		2	VSGLPTPDLSWQLDGKPIRPDSAHK	RT: 161.63
iNS7-R2-1_SW_RB5_01_8019	Palladin isoform X4 OS=Sus scrofa OX=9823 GN=PALLD PE=1 SV=1	tr|A0A287BPI5|A0A287BPI5_PIG	486761		-5.8	ENGVHSLIIEPVSAR	RT: 62.38
iNS7-R2-1_SW_RB5_01_8019	Palladin isoform X4 OS=Sus scrofa OX=9823 GN=PALLD PE=1 SV=1	tr|A0A287BPI5|A0A287BPI5_PIG	251142		-4.6	DAGIYTCVATNR	RT: 65.93
iNS7-R2-1_SW_RB5_01_8019	Palladin isoform X4 OS=Sus scrofa OX=9823 GN=PALLD PE=1 SV=1	tr|A0A287BPI5|A0A287BPI5_PIG	504545		-5	LQNTGVADGYPVR	RT: 59.73
iNS7-R2-1_SW_RB5_01_8019	Palladin isoform X4 OS=Sus scrofa OX=9823 GN=PALLD PE=1 SV=1	tr|A0A287BPI5|A0A287BPI5_PIG	413972		-8	LQNTGVADGYPVRLECR	RT: 57.44
iNS7-R2-1_SW_RB5_01_8019	Palladin isoform X4 OS=Sus scrofa OX=9823 GN=PALLD PE=1 SV=1	tr|A0A287BPI5|A0A287BPI5_PIG	87590		-2.3	VAGAPPPQIFWK	RT: 94.51
iNS7-R2-1_SW_RB5_01_8019	Palladin isoform X4 OS=Sus scrofa OX=9823 GN=PALLD PE=1 SV=1	tr|A0A287BPI5|A0A287BPI5_PIG	277875		-2.1	KENESLTHSTDR	RT: 78.24
iNS7-R2-1_SW_RB5_01_8019	Palladin isoform X4 OS=Sus scrofa OX=9823 GN=PALLD PE=1 SV=1	tr|A0A287BPI5|A0A287BPI5_PIG	34352		4.1	VSMHQDSHGYVCLLIQGASK	RT: 52.71
iNS7-R2-1_SW_RB5_01_8019	Palladin isoform X4 OS=Sus scrofa OX=9823 GN=PALLD PE=1 SV=1	tr|A0A287BPI5|A0A287BPI5_PIG	265753		-7.3	NEAGIVSCTAR	RT: 35.52
iNS7-R2-1_SW_RB5_01_8019	Palladin isoform X4 OS=Sus scrofa OX=9823 GN=PALLD PE=1 SV=1	tr|A0A287BPI5|A0A287BPI5_PIG	232047		-3.5	RVRPSASR	RT: 33.57
iNS7-R2-1_SW_RB5_01_8019	Palladin isoform X4 OS=Sus scrofa OX=9823 GN=PALLD PE=1 SV=1	tr|A0A287BPI5|A0A287BPI5_PIG	98059		-2.3	YAALSDQGLDIR	RT: 80.88
iNS7-R2-1_SW_RB5_01_8019	Palladin isoform X4 OS=Sus scrofa OX=9823 GN=PALLD PE=1 SV=1	tr|A0A287BPI5|A0A287BPI5_PIG	14041		0.4	AAFQPEASPSHLTLSPGLVESEDL	RT: 138.27
iNS7-R3-1_SW_RC5_01_8031	Palladin isoform X4 OS=Sus scrofa OX=9823 GN=PALLD PE=1 SV=1	tr|A0A287BPI5|A0A287BPI5_PIG	89205		5.8	SLDLARR	RT: 58.13
iNS7-R3-1_SW_RC5_01_8031	Palladin isoform X4 OS=Sus scrofa OX=9823 GN=PALLD PE=1 SV=1	tr|A0A287BPI5|A0A287BPI5_PIG	2280		-0.5	KPAVSPLLASPSYIR	RT: 130.77
iNS7-R3-1_SW_RC5_01_8031	Palladin isoform X4 OS=Sus scrofa OX=9823 GN=PALLD PE=1 SV=1	tr|A0A287BPI5|A0A287BPI5_PIG	62719		5.7	KPAVSPLLASPSYIR	RT: 130.77
iNS7-R3-1_SW_RC5_01_8031	Palladin isoform X4 OS=Sus scrofa OX=9823 GN=PALLD PE=1 SV=1	tr|A0A287BPI5|A0A287BPI5_PIG	29830		2	APSTSAKPK	RT: 24.52
iNS7-R3-1_SW_RC5_01_8031	Palladin isoform X4 OS=Sus scrofa OX=9823 GN=PALLD PE=1 SV=1	tr|A0A287BPI5|A0A287BPI5_PIG	50407		-3.4	APSTSAKPKATR	RT: 25.98
iNS7-R3-1_SW_RC5_01_8031	Palladin isoform X4 OS=Sus scrofa OX=9823 GN=PALLD PE=1 SV=1	tr|A0A287BPI5|A0A287BPI5_PIG	47348		-3.5	APSTSAKPKATR	RT: 25.98
iNS7-R3-1_SW_RC5_01_8031	Palladin isoform X4 OS=Sus scrofa OX=9823 GN=PALLD PE=1 SV=1	tr|A0A287BPI5|A0A287BPI5_PIG	49020		6.1	HGRPGPQSQLCDK	RT: 57.28
iNS7-R3-1_SW_RC5_01_8031	Palladin isoform X4 OS=Sus scrofa OX=9823 GN=PALLD PE=1 SV=1	tr|A0A287BPI5|A0A287BPI5_PIG	114798		3.1	AASFIEELTSIFR	RT: 45.12
iNS7-R3-1_SW_RC5_01_8031	Palladin isoform X4 OS=Sus scrofa OX=9823 GN=PALLD PE=1 SV=1	tr|A0A287BPI5|A0A287BPI5_PIG	43453		-4.5	EAAKPRNR	RT: 74.54
iNS7-R3-1_SW_RC5_01_8031	Palladin isoform X4 OS=Sus scrofa OX=9823 GN=PALLD PE=1 SV=1	tr|A0A287BPI5|A0A287BPI5_PIG	61503		6.8	SAPASQSPTGDPPEVDVEAEAK	RT: 77.32
iNS7-R3-1_SW_RC5_01_8031	Palladin isoform X4 OS=Sus scrofa OX=9823 GN=PALLD PE=1 SV=1	tr|A0A287BPI5|A0A287BPI5_PIG	57665		-4.3	LPVTGHHSSAAR	RT: 24.94
iNS7-R3-1_SW_RC5_01_8031	Palladin isoform X4 OS=Sus scrofa OX=9823 GN=PALLD PE=1 SV=1	tr|A0A287BPI5|A0A287BPI5_PIG	190076		4.2	SSRSPSPPPPLSAR	RT: 44.97
iNS7-R3-1_SW_RC5_01_8031	Palladin isoform X4 OS=Sus scrofa OX=9823 GN=PALLD PE=1 SV=1	tr|A0A287BPI5|A0A287BPI5_PIG	90269		-2.5	SPSPPPPLSAR	RT: 72.65
iNS7-R3-1_SW_RC5_01_8031	Palladin isoform X4 OS=Sus scrofa OX=9823 GN=PALLD PE=1 SV=1	tr|A0A287BPI5|A0A287BPI5_PIG	7220		-3.8	LRSQEVAEGSR	RT: 217.53
iNS7-R3-1_SW_RC5_01_8031	Palladin isoform X4 OS=Sus scrofa OX=9823 GN=PALLD PE=1 SV=1	tr|A0A287BPI5|A0A287BPI5_PIG	105241		1.4	SQEVAEGSR	RT: 42.83
iNS7-R3-1_SW_RC5_01_8031	Palladin isoform X4 OS=Sus scrofa OX=9823 GN=PALLD PE=1 SV=1	tr|A0A287BPI5|A0A287BPI5_PIG	43111		-4.1	VYLECRVTGTPAPR	RT: 31.83
iNS7-R3-1_SW_RC5_01_8031	Palladin isoform X4 OS=Sus scrofa OX=9823 GN=PALLD PE=1 SV=1	tr|A0A287BPI5|A0A287BPI5_PIG	98211		-1.5	VTGTPAPR	RT: 32.03
iNS7-R3-1_SW_RC5_01_8031	Palladin isoform X4 OS=Sus scrofa OX=9823 GN=PALLD PE=1 SV=1	tr|A0A287BPI5|A0A287BPI5_PIG	48621		-4	SKPGAMPQAQK	RT: 41.01
iNS7-R3-1_SW_RC5_01_8031	Palladin isoform X4 OS=Sus scrofa OX=9823 GN=PALLD PE=1 SV=1	tr|A0A287BPI5|A0A287BPI5_PIG	69958		1.2	SKPGAMPQAQK	RT: 40.31
iNS7-R3-1_SW_RC5_01_8031	Palladin isoform X4 OS=Sus scrofa OX=9823 GN=PALLD PE=1 SV=1	tr|A0A287BPI5|A0A287BPI5_PIG	201742		-1.2	TTSVSLTIGSSSPK	RT: 53.12
iNS7-R3-1_SW_RC5_01_8031	Palladin isoform X4 OS=Sus scrofa OX=9823 GN=PALLD PE=1 SV=1	tr|A0A287BPI5|A0A287BPI5_PIG	24852		-4.3	ELQSIAATEGQVVVLECRVR	RT: 200.88
iNS7-R3-1_SW_RC5_01_8031	Palladin isoform X4 OS=Sus scrofa OX=9823 GN=PALLD PE=1 SV=1	tr|A0A287BPI5|A0A287BPI5_PIG	71136		-4.9	VRGAPPLQVR	RT: 42
iNS7-R3-1_SW_RC5_01_8031	Palladin isoform X4 OS=Sus scrofa OX=9823 GN=PALLD PE=1 SV=1	tr|A0A287BPI5|A0A287BPI5_PIG	83923		-6	GAPPLQVR	RT: 29.67
iNS7-R3-1_SW_RC5_01_8031	Palladin isoform X4 OS=Sus scrofa OX=9823 GN=PALLD PE=1 SV=1	tr|A0A287BPI5|A0A287BPI5_PIG	76684		7.1	QGSEIQDSPDFR	RT: 57.49
iNS7-R3-1_SW_RC5_01_8031	Palladin isoform X4 OS=Sus scrofa OX=9823 GN=PALLD PE=1 SV=1	tr|A0A287BPI5|A0A287BPI5_PIG	63099		-2.2	ILQKKPR	RT: 27.93
iNS7-R3-1_SW_RC5_01_8031	Palladin isoform X4 OS=Sus scrofa OX=9823 GN=PALLD PE=1 SV=1	tr|A0A287BPI5|A0A287BPI5_PIG	13452		2.1	EPNGVHASHGHGMNGLVNGK	RT: 100.81
iNS7-R3-1_SW_RC5_01_8031	Palladin isoform X4 OS=Sus scrofa OX=9823 GN=PALLD PE=1 SV=1	tr|A0A287BPI5|A0A287BPI5_PIG	31673		2.8	AMQASGSFSYARPK	RT: 88.78
iNS7-R3-1_SW_RC5_01_8031	Palladin isoform X4 OS=Sus scrofa OX=9823 GN=PALLD PE=1 SV=1	tr|A0A287BPI5|A0A287BPI5_PIG	41800		-1.1	QFIAAQSLSPGSPASPTPPAGR	RT: 102.75
iNS7-R3-1_SW_RC5_01_8031	Palladin isoform X4 OS=Sus scrofa OX=9823 GN=PALLD PE=1 SV=1	tr|A0A287BPI5|A0A287BPI5_PIG	11077		1.2	SGPGPAPAALLCALLPSPPAAATVPTTVSALGLPR	RT: 184.13
iNS7-R3-1_SW_RC5_01_8031	Palladin isoform X4 OS=Sus scrofa OX=9823 GN=PALLD PE=1 SV=1	tr|A0A287BPI5|A0A287BPI5_PIG	2831		2.4	SGPGPAPAALLCALLPSPPAAATVPTTVSALGLPR	RT: 184.13
iNS7-R3-1_SW_RC5_01_8031	Palladin isoform X4 OS=Sus scrofa OX=9823 GN=PALLD PE=1 SV=1	tr|A0A287BPI5|A0A287BPI5_PIG	34447		-7.3	AAPAAAFPK	RT: 46.99
iNS7-R3-1_SW_RC5_01_8031	Palladin isoform X4 OS=Sus scrofa OX=9823 GN=PALLD PE=1 SV=1	tr|A0A287BPI5|A0A287BPI5_PIG	103436		-1.3	TTRMASDEEIQGSK	RT: 58.25
iNS7-R3-1_SW_RC5_01_8031	Palladin isoform X4 OS=Sus scrofa OX=9823 GN=PALLD PE=1 SV=1	tr|A0A287BPI5|A0A287BPI5_PIG	74138		-2.8	TTRMASDEEIQGSK	RT: 77.24
iNS7-R3-1_SW_RC5_01_8031	Palladin isoform X4 OS=Sus scrofa OX=9823 GN=PALLD PE=1 SV=1	tr|A0A287BPI5|A0A287BPI5_PIG	53542		1.6	MASDEEIQGSKDAVIQDLER	RT: 83.09
iNS7-R3-1_SW_RC5_01_8031	Palladin isoform X4 OS=Sus scrofa OX=9823 GN=PALLD PE=1 SV=1	tr|A0A287BPI5|A0A287BPI5_PIG	46360		-4.1	DAVIQDLER	RT: 60.42
iNS7-R3-1_SW_RC5_01_8031	Palladin isoform X4 OS=Sus scrofa OX=9823 GN=PALLD PE=1 SV=1	tr|A0A287BPI5|A0A287BPI5_PIG	68913		-5.1	FKEDLLNNGQPR	RT: 42
iNS7-R3-1_SW_RC5_01_8031	Palladin isoform X4 OS=Sus scrofa OX=9823 GN=PALLD PE=1 SV=1	tr|A0A287BPI5|A0A287BPI5_PIG	130986		-6.4	EDLLNNGQPR	RT: 58.2
iNS7-R3-1_SW_RC5_01_8031	Palladin isoform X4 OS=Sus scrofa OX=9823 GN=PALLD PE=1 SV=1	tr|A0A287BPI5|A0A287BPI5_PIG	56012		-8.6	LTYEERMAR	RT: 38.11
iNS7-R3-1_SW_RC5_01_8031	Palladin isoform X4 OS=Sus scrofa OX=9823 GN=PALLD PE=1 SV=1	tr|A0A287BPI5|A0A287BPI5_PIG	45049		-5.7	VSSCEQR	RT: 76.62
iNS7-R3-1_SW_RC5_01_8031	Palladin isoform X4 OS=Sus scrofa OX=9823 GN=PALLD PE=1 SV=1	tr|A0A287BPI5|A0A287BPI5_PIG	98268		-2.7	VFEGMPVTFMCR	RT: 52.98
iNS7-R3-1_SW_RC5_01_8031	Palladin isoform X4 OS=Sus scrofa OX=9823 GN=PALLD PE=1 SV=1	tr|A0A287BPI5|A0A287BPI5_PIG	83790		-0.2	VFEGMPVTFMCR	RT: 66.61
iNS7-R3-1_SW_RC5_01_8031	Palladin isoform X4 OS=Sus scrofa OX=9823 GN=PALLD PE=1 SV=1	tr|A0A287BPI5|A0A287BPI5_PIG	43111		-0.8	VFEGMPVTFMCR	RT: 66.61
iNS7-R3-1_SW_RC5_01_8031	Palladin isoform X4 OS=Sus scrofa OX=9823 GN=PALLD PE=1 SV=1	tr|A0A287BPI5|A0A287BPI5_PIG	13015		0.3	VFEGMPVTFMCRVTGNPKPK	RT: 139.05
iNS7-R3-1_SW_RC5_01_8031	Palladin isoform X4 OS=Sus scrofa OX=9823 GN=PALLD PE=1 SV=1	tr|A0A287BPI5|A0A287BPI5_PIG	68799		-6.8	VTGNPKPK	RT: 43.23
iNS7-R3-1_SW_RC5_01_8031	Palladin isoform X4 OS=Sus scrofa OX=9823 GN=PALLD PE=1 SV=1	tr|A0A287BPI5|A0A287BPI5_PIG	152000		0.2	DGKQVSPR	RT: 57
iNS7-R3-1_SW_RC5_01_8031	Palladin isoform X4 OS=Sus scrofa OX=9823 GN=PALLD PE=1 SV=1	tr|A0A287BPI5|A0A287BPI5_PIG	111264		-2.4	LMVQAVNQR	RT: 74.66
iNS7-R3-1_SW_RC5_01_8031	Palladin isoform X4 OS=Sus scrofa OX=9823 GN=PALLD PE=1 SV=1	tr|A0A287BPI5|A0A287BPI5_PIG	118959		-1.6	LMVQAVNQR	RT: 32.03
iNS7-R3-1_SW_RC5_01_8031	Palladin isoform X4 OS=Sus scrofa OX=9823 GN=PALLD PE=1 SV=1	tr|A0A287BPI5|A0A287BPI5_PIG	66538		-1	LMVQAVNQRGR	RT: 80.17
iNS7-R3-1_SW_RC5_01_8031	Palladin isoform X4 OS=Sus scrofa OX=9823 GN=PALLD PE=1 SV=1	tr|A0A287BPI5|A0A287BPI5_PIG	64201		-6.8	LMVQAVNQRGR	RT: 63.95
iNS7-R3-1_SW_RC5_01_8031	Palladin isoform X4 OS=Sus scrofa OX=9823 GN=PALLD PE=1 SV=1	tr|A0A287BPI5|A0A287BPI5_PIG	43814		-2	SPRSPAGHPHGR	RT: 37.83
iNS7-R3-1_SW_RC5_01_8031	Palladin isoform X4 OS=Sus scrofa OX=9823 GN=PALLD PE=1 SV=1	tr|A0A287BPI5|A0A287BPI5_PIG	306432		1.2	SPAGHPHGR	RT: 17.63
iNS7-R3-1_SW_RC5_01_8031	Palladin isoform X4 OS=Sus scrofa OX=9823 GN=PALLD PE=1 SV=1	tr|A0A287BPI5|A0A287BPI5_PIG	64562		-4.1	SRDSADESEPIQER	RT: 44.21
iNS7-R3-1_SW_RC5_01_8031	Palladin isoform X4 OS=Sus scrofa OX=9823 GN=PALLD PE=1 SV=1	tr|A0A287BPI5|A0A287BPI5_PIG	41116		2.1	FFRPHFLQAPGDLTVQEGKLCR	RT: 135.07
iNS7-R3-1_SW_RC5_01_8031	Palladin isoform X4 OS=Sus scrofa OX=9823 GN=PALLD PE=1 SV=1	tr|A0A287BPI5|A0A287BPI5_PIG	41857		2	FFRPHFLQAPGDLTVQEGKLCR	RT: 135.07
iNS7-R3-1_SW_RC5_01_8031	Palladin isoform X4 OS=Sus scrofa OX=9823 GN=PALLD PE=1 SV=1	tr|A0A287BPI5|A0A287BPI5_PIG	12882		-1.4	LCRMDCK	RT: 126.61
iNS7-R3-1_SW_RC5_01_8031	Palladin isoform X4 OS=Sus scrofa OX=9823 GN=PALLD PE=1 SV=1	tr|A0A287BPI5|A0A287BPI5_PIG	29089		-0.2	VSGLPTPDLSWQLDGKPIRPDSAHK	RT: 156.54
iNS7-R3-1_SW_RC5_01_8031	Palladin isoform X4 OS=Sus scrofa OX=9823 GN=PALLD PE=1 SV=1	tr|A0A287BPI5|A0A287BPI5_PIG	107445		-5.3	ENGVHSLIIEPVSAR	RT: 60.69
iNS7-R3-1_SW_RC5_01_8031	Palladin isoform X4 OS=Sus scrofa OX=9823 GN=PALLD PE=1 SV=1	tr|A0A287BPI5|A0A287BPI5_PIG	77729		-0.5	DAGIYTCVATNR	RT: 66.21
iNS7-R3-1_SW_RC5_01_8031	Palladin isoform X4 OS=Sus scrofa OX=9823 GN=PALLD PE=1 SV=1	tr|A0A287BPI5|A0A287BPI5_PIG	79192		-4.6	LQNTGVADGYPVR	RT: 67.29
iNS7-R3-1_SW_RC5_01_8031	Palladin isoform X4 OS=Sus scrofa OX=9823 GN=PALLD PE=1 SV=1	tr|A0A287BPI5|A0A287BPI5_PIG	75373		1.7	LQNTGVADGYPVRLECR	RT: 77.52
iNS7-R3-1_SW_RC5_01_8031	Palladin isoform X4 OS=Sus scrofa OX=9823 GN=PALLD PE=1 SV=1	tr|A0A287BPI5|A0A287BPI5_PIG	109174		-5.9	VAGAPPPQIFWK	RT: 94.49
iNS7-R3-1_SW_RC5_01_8031	Palladin isoform X4 OS=Sus scrofa OX=9823 GN=PALLD PE=1 SV=1	tr|A0A287BPI5|A0A287BPI5_PIG	50008		-0.7	KENESLTHSTDR	RT: 78.28
iNS7-R3-1_SW_RC5_01_8031	Palladin isoform X4 OS=Sus scrofa OX=9823 GN=PALLD PE=1 SV=1	tr|A0A287BPI5|A0A287BPI5_PIG	62966		0.1	VSMHQDSHGYVCLLIQGASK	RT: 53.33
iNS7-R3-1_SW_RC5_01_8031	Palladin isoform X4 OS=Sus scrofa OX=9823 GN=PALLD PE=1 SV=1	tr|A0A287BPI5|A0A287BPI5_PIG	83201		-3.7	NEAGIVSCTAR	RT: 42.2
iNS7-R3-1_SW_RC5_01_8031	Palladin isoform X4 OS=Sus scrofa OX=9823 GN=PALLD PE=1 SV=1	tr|A0A287BPI5|A0A287BPI5_PIG	77843		-1.1	RVRPSASR	RT: 32.03
iNS7-R3-1_SW_RC5_01_8031	Palladin isoform X4 OS=Sus scrofa OX=9823 GN=PALLD PE=1 SV=1	tr|A0A287BPI5|A0A287BPI5_PIG	87970		0.1	YAALSDQGLDIR	RT: 80.52
iNS7-R3-1_SW_RC5_01_8031	Palladin isoform X4 OS=Sus scrofa OX=9823 GN=PALLD PE=1 SV=1	tr|A0A287BPI5|A0A287BPI5_PIG	118712		-1.6	AAFQPEASPSHLTLSPGLVESEDL	RT: 135.28
PEF-R1-1_SW_RA7_01_8012	Palladin isoform X4 OS=Sus scrofa OX=9823 GN=PALLD PE=1 SV=1	tr|A0A287BPI5|A0A287BPI5_PIG	328149		-7.5	SLDLARR	RT: 44.9
PEF-R1-1_SW_RA7_01_8012	Palladin isoform X4 OS=Sus scrofa OX=9823 GN=PALLD PE=1 SV=1	tr|A0A287BPI5|A0A287BPI5_PIG	156180		-7.8	KPAVSPLLASPSYIR	RT: 112.85
PEF-R1-1_SW_RA7_01_8012	Palladin isoform X4 OS=Sus scrofa OX=9823 GN=PALLD PE=1 SV=1	tr|A0A287BPI5|A0A287BPI5_PIG	156389		-7.8	KPAVSPLLASPSYIR	RT: 112.85
PEF-R1-1_SW_RA7_01_8012	Palladin isoform X4 OS=Sus scrofa OX=9823 GN=PALLD PE=1 SV=1	tr|A0A287BPI5|A0A287BPI5_PIG	171190		-4.3	APSTSAKPK	RT: 17.7
PEF-R1-1_SW_RA7_01_8012	Palladin isoform X4 OS=Sus scrofa OX=9823 GN=PALLD PE=1 SV=1	tr|A0A287BPI5|A0A287BPI5_PIG	154052		-2.3	APSTSAKPKATR	RT: 32.04
PEF-R1-1_SW_RA7_01_8012	Palladin isoform X4 OS=Sus scrofa OX=9823 GN=PALLD PE=1 SV=1	tr|A0A287BPI5|A0A287BPI5_PIG	147972		-1.4	APSTSAKPKATR	RT: 32.04
PEF-R1-1_SW_RA7_01_8012	Palladin isoform X4 OS=Sus scrofa OX=9823 GN=PALLD PE=1 SV=1	tr|A0A287BPI5|A0A287BPI5_PIG	49894		3.2	HGRPGPQSQLCDK	RT: 61.18
PEF-R1-1_SW_RA7_01_8012	Palladin isoform X4 OS=Sus scrofa OX=9823 GN=PALLD PE=1 SV=1	tr|A0A287BPI5|A0A287BPI5_PIG	312189		-7.7	AASFIEELTSIFR	RT: 44.91
PEF-R1-1_SW_RA7_01_8012	Palladin isoform X4 OS=Sus scrofa OX=9823 GN=PALLD PE=1 SV=1	tr|A0A287BPI5|A0A287BPI5_PIG	65208		-1.7	EAAKPRNR	RT: 76.84
PEF-R1-1_SW_RA7_01_8012	Palladin isoform X4 OS=Sus scrofa OX=9823 GN=PALLD PE=1 SV=1	tr|A0A287BPI5|A0A287BPI5_PIG	207765		-4.9	SAPASQSPTGDPPEVDVEAEAK	RT: 76.97
PEF-R1-1_SW_RA7_01_8012	Palladin isoform X4 OS=Sus scrofa OX=9823 GN=PALLD PE=1 SV=1	tr|A0A287BPI5|A0A287BPI5_PIG	40546		0.2	LPVTGHHSSAAR	RT: 25.08
PEF-R1-1_SW_RA7_01_8012	Palladin isoform X4 OS=Sus scrofa OX=9823 GN=PALLD PE=1 SV=1	tr|A0A287BPI5|A0A287BPI5_PIG	353666		-6.2	SSRSPSPPPPLSAR	RT: 47.62
PEF-R1-1_SW_RA7_01_8012	Palladin isoform X4 OS=Sus scrofa OX=9823 GN=PALLD PE=1 SV=1	tr|A0A287BPI5|A0A287BPI5_PIG	875805		-3.3	SPSPPPPLSAR	RT: 68.62
PEF-R1-1_SW_RA7_01_8012	Palladin isoform X4 OS=Sus scrofa OX=9823 GN=PALLD PE=1 SV=1	tr|A0A287BPI5|A0A287BPI5_PIG	34295		-6.7	LRSQEVAEGSR	RT: 215.61
PEF-R1-1_SW_RA7_01_8012	Palladin isoform X4 OS=Sus scrofa OX=9823 GN=PALLD PE=1 SV=1	tr|A0A287BPI5|A0A287BPI5_PIG	379962		-6	SQEVAEGSR	RT: 47.62
PEF-R1-1_SW_RA7_01_8012	Palladin isoform X4 OS=Sus scrofa OX=9823 GN=PALLD PE=1 SV=1	tr|A0A287BPI5|A0A287BPI5_PIG	133779		-7.8	VYLECRVTGTPAPR	RT: 33.78
PEF-R1-1_SW_RA7_01_8012	Palladin isoform X4 OS=Sus scrofa OX=9823 GN=PALLD PE=1 SV=1	tr|A0A287BPI5|A0A287BPI5_PIG	241509		-9	VTGTPAPR	RT: 49.22
PEF-R1-1_SW_RA7_01_8012	Palladin isoform X4 OS=Sus scrofa OX=9823 GN=PALLD PE=1 SV=1	tr|A0A287BPI5|A0A287BPI5_PIG	36233		-2	SKPGAMPQAQK	RT: 43.17
PEF-R1-1_SW_RA7_01_8012	Palladin isoform X4 OS=Sus scrofa OX=9823 GN=PALLD PE=1 SV=1	tr|A0A287BPI5|A0A287BPI5_PIG	58387		4.3	SKPGAMPQAQK	RT: 41.49
PEF-R1-1_SW_RA7_01_8012	Palladin isoform X4 OS=Sus scrofa OX=9823 GN=PALLD PE=1 SV=1	tr|A0A287BPI5|A0A287BPI5_PIG	183350		0.1	TTSVSLTIGSSSPK	RT: 56.06
PEF-R1-1_SW_RA7_01_8012	Palladin isoform X4 OS=Sus scrofa OX=9823 GN=PALLD PE=1 SV=1	tr|A0A287BPI5|A0A287BPI5_PIG	44916		-0.3	ELQSIAATEGQVVVLECRVR	RT: 202.56
PEF-R1-1_SW_RA7_01_8012	Palladin isoform X4 OS=Sus scrofa OX=9823 GN=PALLD PE=1 SV=1	tr|A0A287BPI5|A0A287BPI5_PIG	338580		-7.2	VRGAPPLQVR	RT: 44.91
PEF-R1-1_SW_RA7_01_8012	Palladin isoform X4 OS=Sus scrofa OX=9823 GN=PALLD PE=1 SV=1	tr|A0A287BPI5|A0A287BPI5_PIG	148409		-6.8	GAPPLQVR	RT: 33.78
PEF-R1-1_SW_RA7_01_8012	Palladin isoform X4 OS=Sus scrofa OX=9823 GN=PALLD PE=1 SV=1	tr|A0A287BPI5|A0A287BPI5_PIG	114095		-2.3	QGSEIQDSPDFR	RT: 50.47
PEF-R1-1_SW_RA7_01_8012	Palladin isoform X4 OS=Sus scrofa OX=9823 GN=PALLD PE=1 SV=1	tr|A0A287BPI5|A0A287BPI5_PIG	99598		-3.4	ILQKKPR	RT: 30.5
PEF-R1-1_SW_RA7_01_8012	Palladin isoform X4 OS=Sus scrofa OX=9823 GN=PALLD PE=1 SV=1	tr|A0A287BPI5|A0A287BPI5_PIG	157149		-7.7	EPNGVHASHGHGMNGLVNGK	RT: 105.77
PEF-R1-1_SW_RA7_01_8012	Palladin isoform X4 OS=Sus scrofa OX=9823 GN=PALLD PE=1 SV=1	tr|A0A287BPI5|A0A287BPI5_PIG	29070		2.2	AMQASGSFSYARPK	RT: 91.43
PEF-R1-1_SW_RA7_01_8012	Palladin isoform X4 OS=Sus scrofa OX=9823 GN=PALLD PE=1 SV=1	tr|A0A287BPI5|A0A287BPI5_PIG	201837		-0.6	QFIAAQSLSPGSPASPTPPAGR	RT: 104.79
PEF-R1-1_SW_RA7_01_8012	Palladin isoform X4 OS=Sus scrofa OX=9823 GN=PALLD PE=1 SV=1	tr|A0A287BPI5|A0A287BPI5_PIG	1273		0.2	SGPGPAPAALLCALLPSPPAAATVPTTVSALGLPR	RT: 185.97
PEF-R1-1_SW_RA7_01_8012	Palladin isoform X4 OS=Sus scrofa OX=9823 GN=PALLD PE=1 SV=1	tr|A0A287BPI5|A0A287BPI5_PIG	83505		4.8	SGPGPAPAALLCALLPSPPAAATVPTTVSALGLPR	RT: 185.97
PEF-R1-1_SW_RA7_01_8012	Palladin isoform X4 OS=Sus scrofa OX=9823 GN=PALLD PE=1 SV=1	tr|A0A287BPI5|A0A287BPI5_PIG	124963		-3.5	AAPAAAFPK	RT: 41.29
PEF-R1-1_SW_RA7_01_8012	Palladin isoform X4 OS=Sus scrofa OX=9823 GN=PALLD PE=1 SV=1	tr|A0A287BPI5|A0A287BPI5_PIG	48108		-1.5	TTRMASDEEIQGSK	RT: 57.36
PEF-R1-1_SW_RA7_01_8012	Palladin isoform X4 OS=Sus scrofa OX=9823 GN=PALLD PE=1 SV=1	tr|A0A287BPI5|A0A287BPI5_PIG	49552		-0.6	TTRMASDEEIQGSK	RT: 77.25
PEF-R1-1_SW_RA7_01_8012	Palladin isoform X4 OS=Sus scrofa OX=9823 GN=PALLD PE=1 SV=1	tr|A0A287BPI5|A0A287BPI5_PIG	65151		0.8	MASDEEIQGSKDAVIQDLER	RT: 77.05
PEF-R1-1_SW_RA7_01_8012	Palladin isoform X4 OS=Sus scrofa OX=9823 GN=PALLD PE=1 SV=1	tr|A0A287BPI5|A0A287BPI5_PIG	506236		-7.5	DAVIQDLER	RT: 64.03
PEF-R1-1_SW_RA7_01_8012	Palladin isoform X4 OS=Sus scrofa OX=9823 GN=PALLD PE=1 SV=1	tr|A0A287BPI5|A0A287BPI5_PIG	161747		-3.3	FKEDLLNNGQPR	RT: 39.97
PEF-R1-1_SW_RA7_01_8012	Palladin isoform X4 OS=Sus scrofa OX=9823 GN=PALLD PE=1 SV=1	tr|A0A287BPI5|A0A287BPI5_PIG	486134		-7.9	EDLLNNGQPR	RT: 64.03
PEF-R1-1_SW_RA7_01_8012	Palladin isoform X4 OS=Sus scrofa OX=9823 GN=PALLD PE=1 SV=1	tr|A0A287BPI5|A0A287BPI5_PIG	138130		-1.3	LTYEERMAR	RT: 38.23
PEF-R1-1_SW_RA7_01_8012	Palladin isoform X4 OS=Sus scrofa OX=9823 GN=PALLD PE=1 SV=1	tr|A0A287BPI5|A0A287BPI5_PIG	190380		-4.9	VSSCEQR	RT: 77.59
PEF-R1-1_SW_RA7_01_8012	Palladin isoform X4 OS=Sus scrofa OX=9823 GN=PALLD PE=1 SV=1	tr|A0A287BPI5|A0A287BPI5_PIG	267596		-3.5	VFEGMPVTFMCR	RT: 49.01
PEF-R1-1_SW_RA7_01_8012	Palladin isoform X4 OS=Sus scrofa OX=9823 GN=PALLD PE=1 SV=1	tr|A0A287BPI5|A0A287BPI5_PIG	465804		-8.4	VFEGMPVTFMCR	RT: 64.03
PEF-R1-1_SW_RA7_01_8012	Palladin isoform X4 OS=Sus scrofa OX=9823 GN=PALLD PE=1 SV=1	tr|A0A287BPI5|A0A287BPI5_PIG	464626		-8.4	VFEGMPVTFMCR	RT: 64.03
PEF-R1-1_SW_RA7_01_8012	Palladin isoform X4 OS=Sus scrofa OX=9823 GN=PALLD PE=1 SV=1	tr|A0A287BPI5|A0A287BPI5_PIG	130720		2	VFEGMPVTFMCRVTGNPKPK	RT: 139.92
PEF-R1-1_SW_RA7_01_8012	Palladin isoform X4 OS=Sus scrofa OX=9823 GN=PALLD PE=1 SV=1	tr|A0A287BPI5|A0A287BPI5_PIG	232541		-2.4	VTGNPKPK	RT: 52.01
PEF-R1-1_SW_RA7_01_8012	Palladin isoform X4 OS=Sus scrofa OX=9823 GN=PALLD PE=1 SV=1	tr|A0A287BPI5|A0A287BPI5_PIG	326363		-7.6	DGKQVSPR	RT: 44.9
PEF-R1-1_SW_RA7_01_8012	Palladin isoform X4 OS=Sus scrofa OX=9823 GN=PALLD PE=1 SV=1	tr|A0A287BPI5|A0A287BPI5_PIG	696312		-3.8	LMVQAVNQR	RT: 74.81
PEF-R1-1_SW_RA7_01_8012	Palladin isoform X4 OS=Sus scrofa OX=9823 GN=PALLD PE=1 SV=1	tr|A0A287BPI5|A0A287BPI5_PIG	121201		0.6	LMVQAVNQR	RT: 31.34
PEF-R1-1_SW_RA7_01_8012	Palladin isoform X4 OS=Sus scrofa OX=9823 GN=PALLD PE=1 SV=1	tr|A0A287BPI5|A0A287BPI5_PIG	285855		-0.4	LMVQAVNQRGR	RT: 83.78
PEF-R1-1_SW_RA7_01_8012	Palladin isoform X4 OS=Sus scrofa OX=9823 GN=PALLD PE=1 SV=1	tr|A0A287BPI5|A0A287BPI5_PIG	535021		-8.1	LMVQAVNQRGR	RT: 64.03
PEF-R1-1_SW_RA7_01_8012	Palladin isoform X4 OS=Sus scrofa OX=9823 GN=PALLD PE=1 SV=1	tr|A0A287BPI5|A0A287BPI5_PIG	119339		3.8	SPRSPAGHPHGR	RT: 33.22
PEF-R1-1_SW_RA7_01_8012	Palladin isoform X4 OS=Sus scrofa OX=9823 GN=PALLD PE=1 SV=1	tr|A0A287BPI5|A0A287BPI5_PIG	320207		-7.6	SPAGHPHGR	RT: 44.91
PEF-R1-1_SW_RA7_01_8012	Palladin isoform X4 OS=Sus scrofa OX=9823 GN=PALLD PE=1 SV=1	tr|A0A287BPI5|A0A287BPI5_PIG	360297		-7.7	SRDSADESEPIQER	RT: 44.9
PEF-R1-1_SW_RA7_01_8012	Palladin isoform X4 OS=Sus scrofa OX=9823 GN=PALLD PE=1 SV=1	tr|A0A287BPI5|A0A287BPI5_PIG	128079		-2.1	FFRPHFLQAPGDLTVQEGKLCR	RT: 140.09
PEF-R1-1_SW_RA7_01_8012	Palladin isoform X4 OS=Sus scrofa OX=9823 GN=PALLD PE=1 SV=1	tr|A0A287BPI5|A0A287BPI5_PIG	103607		-3.6	FFRPHFLQAPGDLTVQEGKLCR	RT: 140.09
PEF-R1-1_SW_RA7_01_8012	Palladin isoform X4 OS=Sus scrofa OX=9823 GN=PALLD PE=1 SV=1	tr|A0A287BPI5|A0A287BPI5_PIG	21356		1.2	LCRMDCK	RT: 123.14
PEF-R1-1_SW_RA7_01_8012	Palladin isoform X4 OS=Sus scrofa OX=9823 GN=PALLD PE=1 SV=1	tr|A0A287BPI5|A0A287BPI5_PIG	227677		3.1	VSGLPTPDLSWQLDGKPIRPDSAHK	RT: 160.39
PEF-R1-1_SW_RA7_01_8012	Palladin isoform X4 OS=Sus scrofa OX=9823 GN=PALLD PE=1 SV=1	tr|A0A287BPI5|A0A287BPI5_PIG	193553		-4.9	ENGVHSLIIEPVSAR	RT: 65.77
PEF-R1-1_SW_RA7_01_8012	Palladin isoform X4 OS=Sus scrofa OX=9823 GN=PALLD PE=1 SV=1	tr|A0A287BPI5|A0A287BPI5_PIG	103949		-5.8	DAGIYTCVATNR	RT: 68.55
PEF-R1-1_SW_RA7_01_8012	Palladin isoform X4 OS=Sus scrofa OX=9823 GN=PALLD PE=1 SV=1	tr|A0A287BPI5|A0A287BPI5_PIG	425448		-6.9	LQNTGVADGYPVR	RT: 70.43
PEF-R1-1_SW_RA7_01_8012	Palladin isoform X4 OS=Sus scrofa OX=9823 GN=PALLD PE=1 SV=1	tr|A0A287BPI5|A0A287BPI5_PIG	378632		-7.1	LQNTGVADGYPVRLECR	RT: 70.43
PEF-R1-1_SW_RA7_01_8012	Palladin isoform X4 OS=Sus scrofa OX=9823 GN=PALLD PE=1 SV=1	tr|A0A287BPI5|A0A287BPI5_PIG	112841		-2.5	VAGAPPPQIFWK	RT: 94.64
PEF-R1-1_SW_RA7_01_8012	Palladin isoform X4 OS=Sus scrofa OX=9823 GN=PALLD PE=1 SV=1	tr|A0A287BPI5|A0A287BPI5_PIG	57057		-4.1	KENESLTHSTDR	RT: 79.76
PEF-R1-1_SW_RA7_01_8012	Palladin isoform X4 OS=Sus scrofa OX=9823 GN=PALLD PE=1 SV=1	tr|A0A287BPI5|A0A287BPI5_PIG	30856		-0.7	VSMHQDSHGYVCLLIQGASK	RT: 56.11
PEF-R1-1_SW_RA7_01_8012	Palladin isoform X4 OS=Sus scrofa OX=9823 GN=PALLD PE=1 SV=1	tr|A0A287BPI5|A0A287BPI5_PIG	182438		-4.9	NEAGIVSCTAR	RT: 40.59
PEF-R1-1_SW_RA7_01_8012	Palladin isoform X4 OS=Sus scrofa OX=9823 GN=PALLD PE=1 SV=1	tr|A0A287BPI5|A0A287BPI5_PIG	101004		-3.9	RVRPSASR	RT: 34.05
PEF-R1-1_SW_RA7_01_8012	Palladin isoform X4 OS=Sus scrofa OX=9823 GN=PALLD PE=1 SV=1	tr|A0A287BPI5|A0A287BPI5_PIG	55936		-4	YAALSDQGLDIR	RT: 83.78
PEF-R1-1_SW_RA7_01_8012	Palladin isoform X4 OS=Sus scrofa OX=9823 GN=PALLD PE=1 SV=1	tr|A0A287BPI5|A0A287BPI5_PIG	115691		0.7	AAFQPEASPSHLTLSPGLVESEDL	RT: 137.17
PEF-R2-1_SW_RB4_01_8018	Palladin isoform X4 OS=Sus scrofa OX=9823 GN=PALLD PE=1 SV=1	tr|A0A287BPI5|A0A287BPI5_PIG	148029		-2	SLDLARR	RT: 53.35
PEF-R2-1_SW_RB4_01_8018	Palladin isoform X4 OS=Sus scrofa OX=9823 GN=PALLD PE=1 SV=1	tr|A0A287BPI5|A0A287BPI5_PIG	135375		-4.7	KPAVSPLLASPSYIR	RT: 98.58
PEF-R2-1_SW_RB4_01_8018	Palladin isoform X4 OS=Sus scrofa OX=9823 GN=PALLD PE=1 SV=1	tr|A0A287BPI5|A0A287BPI5_PIG	156579		-4.2	KPAVSPLLASPSYIR	RT: 98.58
PEF-R2-1_SW_RB4_01_8018	Palladin isoform X4 OS=Sus scrofa OX=9823 GN=PALLD PE=1 SV=1	tr|A0A287BPI5|A0A287BPI5_PIG	836		-3.6	APSTSAKPK	RT: 24.39
PEF-R2-1_SW_RB4_01_8018	Palladin isoform X4 OS=Sus scrofa OX=9823 GN=PALLD PE=1 SV=1	tr|A0A287BPI5|A0A287BPI5_PIG	58976		-5.1	APSTSAKPKATR	RT: 30.8
PEF-R2-1_SW_RB4_01_8018	Palladin isoform X4 OS=Sus scrofa OX=9823 GN=PALLD PE=1 SV=1	tr|A0A287BPI5|A0A287BPI5_PIG	50274		-6.1	APSTSAKPKATR	RT: 30.8
PEF-R2-1_SW_RB4_01_8018	Palladin isoform X4 OS=Sus scrofa OX=9823 GN=PALLD PE=1 SV=1	tr|A0A287BPI5|A0A287BPI5_PIG	11153		2.7	HGRPGPQSQLCDK	RT: 53.35
PEF-R2-1_SW_RB4_01_8018	Palladin isoform X4 OS=Sus scrofa OX=9823 GN=PALLD PE=1 SV=1	tr|A0A287BPI5|A0A287BPI5_PIG	9690		5.3	AASFIEELTSIFR	RT: 44.1
PEF-R2-1_SW_RB4_01_8018	Palladin isoform X4 OS=Sus scrofa OX=9823 GN=PALLD PE=1 SV=1	tr|A0A287BPI5|A0A287BPI5_PIG	26011		3	EAAKPRNR	RT: 74.85
PEF-R2-1_SW_RB4_01_8018	Palladin isoform X4 OS=Sus scrofa OX=9823 GN=PALLD PE=1 SV=1	tr|A0A287BPI5|A0A287BPI5_PIG	20083		-4.3	SAPASQSPTGDPPEVDVEAEAK	RT: 99.21
PEF-R2-1_SW_RB4_01_8018	Palladin isoform X4 OS=Sus scrofa OX=9823 GN=PALLD PE=1 SV=1	tr|A0A287BPI5|A0A287BPI5_PIG	988		2	LPVTGHHSSAAR	RT: 27.33
PEF-R2-1_SW_RB4_01_8018	Palladin isoform X4 OS=Sus scrofa OX=9823 GN=PALLD PE=1 SV=1	tr|A0A287BPI5|A0A287BPI5_PIG	249166		-1.7	SSRSPSPPPPLSAR	RT: 53.35
PEF-R2-1_SW_RB4_01_8018	Palladin isoform X4 OS=Sus scrofa OX=9823 GN=PALLD PE=1 SV=1	tr|A0A287BPI5|A0A287BPI5_PIG	73644		-4.6	SPSPPPPLSAR	RT: 82.23
PEF-R2-1_SW_RB4_01_8018	Palladin isoform X4 OS=Sus scrofa OX=9823 GN=PALLD PE=1 SV=1	tr|A0A287BPI5|A0A287BPI5_PIG	931		-0.2	LRSQEVAEGSR	RT: 219.04
PEF-R2-1_SW_RB4_01_8018	Palladin isoform X4 OS=Sus scrofa OX=9823 GN=PALLD PE=1 SV=1	tr|A0A287BPI5|A0A287BPI5_PIG	53200		-5.4	SQEVAEGSR	RT: 30.8
PEF-R2-1_SW_RB4_01_8018	Palladin isoform X4 OS=Sus scrofa OX=9823 GN=PALLD PE=1 SV=1	tr|A0A287BPI5|A0A287BPI5_PIG	59242		-7.7	VYLECRVTGTPAPR	RT: 37.41
PEF-R2-1_SW_RB4_01_8018	Palladin isoform X4 OS=Sus scrofa OX=9823 GN=PALLD PE=1 SV=1	tr|A0A287BPI5|A0A287BPI5_PIG	61997		3.7	VTGTPAPR	RT: 49.38
PEF-R2-1_SW_RB4_01_8018	Palladin isoform X4 OS=Sus scrofa OX=9823 GN=PALLD PE=1 SV=1	tr|A0A287BPI5|A0A287BPI5_PIG	6992		-2.9	SKPGAMPQAQK	RT: 42
PEF-R2-1_SW_RB4_01_8018	Palladin isoform X4 OS=Sus scrofa OX=9823 GN=PALLD PE=1 SV=1	tr|A0A287BPI5|A0A287BPI5_PIG	2964		-1.2	SKPGAMPQAQK	RT: 39.52
PEF-R2-1_SW_RB4_01_8018	Palladin isoform X4 OS=Sus scrofa OX=9823 GN=PALLD PE=1 SV=1	tr|A0A287BPI5|A0A287BPI5_PIG	32414		2.5	TTSVSLTIGSSSPK	RT: 51.89
PEF-R2-1_SW_RB4_01_8018	Palladin isoform X4 OS=Sus scrofa OX=9823 GN=PALLD PE=1 SV=1	tr|A0A287BPI5|A0A287BPI5_PIG	1919		1.1	ELQSIAATEGQVVVLECRVR	RT: 201.14
PEF-R2-1_SW_RB4_01_8018	Palladin isoform X4 OS=Sus scrofa OX=9823 GN=PALLD PE=1 SV=1	tr|A0A287BPI5|A0A287BPI5_PIG	41629		0.5	VRGAPPLQVR	RT: 39.15
PEF-R2-1_SW_RB4_01_8018	Palladin isoform X4 OS=Sus scrofa OX=9823 GN=PALLD PE=1 SV=1	tr|A0A287BPI5|A0A287BPI5_PIG	49115		0.5	GAPPLQVR	RT: 29.68
PEF-R2-1_SW_RB4_01_8018	Palladin isoform X4 OS=Sus scrofa OX=9823 GN=PALLD PE=1 SV=1	tr|A0A287BPI5|A0A287BPI5_PIG	20824		-3.6	QGSEIQDSPDFR	RT: 51.89
PEF-R2-1_SW_RB4_01_8018	Palladin isoform X4 OS=Sus scrofa OX=9823 GN=PALLD PE=1 SV=1	tr|A0A287BPI5|A0A287BPI5_PIG	16435		4.3	ILQKKPR	RT: 31.43
PEF-R2-1_SW_RB4_01_8018	Palladin isoform X4 OS=Sus scrofa OX=9823 GN=PALLD PE=1 SV=1	tr|A0A287BPI5|A0A287BPI5_PIG	12141		-3.9	EPNGVHASHGHGMNGLVNGK	RT: 102.41
PEF-R2-1_SW_RB4_01_8018	Palladin isoform X4 OS=Sus scrofa OX=9823 GN=PALLD PE=1 SV=1	tr|A0A287BPI5|A0A287BPI5_PIG	5586		-1.7	AMQASGSFSYARPK	RT: 88.98
PEF-R2-1_SW_RB4_01_8018	Palladin isoform X4 OS=Sus scrofa OX=9823 GN=PALLD PE=1 SV=1	tr|A0A287BPI5|A0A287BPI5_PIG	143089		-3.2	QFIAAQSLSPGSPASPTPPAGR	RT: 99.7
PEF-R2-1_SW_RB4_01_8018	Palladin isoform X4 OS=Sus scrofa OX=9823 GN=PALLD PE=1 SV=1	tr|A0A287BPI5|A0A287BPI5_PIG	1178		1.9	SGPGPAPAALLCALLPSPPAAATVPTTVSALGLPR	RT: 187.26
PEF-R2-1_SW_RB4_01_8018	Palladin isoform X4 OS=Sus scrofa OX=9823 GN=PALLD PE=1 SV=1	tr|A0A287BPI5|A0A287BPI5_PIG	3021		-1.2	SGPGPAPAALLCALLPSPPAAATVPTTVSALGLPR	RT: 187.26
PEF-R2-1_SW_RB4_01_8018	Palladin isoform X4 OS=Sus scrofa OX=9823 GN=PALLD PE=1 SV=1	tr|A0A287BPI5|A0A287BPI5_PIG	37601		0.8	AAPAAAFPK	RT: 43.88
PEF-R2-1_SW_RB4_01_8018	Palladin isoform X4 OS=Sus scrofa OX=9823 GN=PALLD PE=1 SV=1	tr|A0A287BPI5|A0A287BPI5_PIG	17822		-3	TTRMASDEEIQGSK	RT: 53.35
PEF-R2-1_SW_RB4_01_8018	Palladin isoform X4 OS=Sus scrofa OX=9823 GN=PALLD PE=1 SV=1	tr|A0A287BPI5|A0A287BPI5_PIG	18202		3.3	TTRMASDEEIQGSK	RT: 82.23
PEF-R2-1_SW_RB4_01_8018	Palladin isoform X4 OS=Sus scrofa OX=9823 GN=PALLD PE=1 SV=1	tr|A0A287BPI5|A0A287BPI5_PIG	3325		-1	MASDEEIQGSKDAVIQDLER	RT: 80.51
PEF-R2-1_SW_RB4_01_8018	Palladin isoform X4 OS=Sus scrofa OX=9823 GN=PALLD PE=1 SV=1	tr|A0A287BPI5|A0A287BPI5_PIG	1463		0.9	DAVIQDLER	RT: 60.59
PEF-R2-1_SW_RB4_01_8018	Palladin isoform X4 OS=Sus scrofa OX=9823 GN=PALLD PE=1 SV=1	tr|A0A287BPI5|A0A287BPI5_PIG	86621		-3.4	FKEDLLNNGQPR	RT: 42
PEF-R2-1_SW_RB4_01_8018	Palladin isoform X4 OS=Sus scrofa OX=9823 GN=PALLD PE=1 SV=1	tr|A0A287BPI5|A0A287BPI5_PIG	54093		-0.1	EDLLNNGQPR	RT: 52.24
PEF-R2-1_SW_RB4_01_8018	Palladin isoform X4 OS=Sus scrofa OX=9823 GN=PALLD PE=1 SV=1	tr|A0A287BPI5|A0A287BPI5_PIG	45448		3.6	LTYEERMAR	RT: 36.78
PEF-R2-1_SW_RB4_01_8018	Palladin isoform X4 OS=Sus scrofa OX=9823 GN=PALLD PE=1 SV=1	tr|A0A287BPI5|A0A287BPI5_PIG	71763		-3.6	VSSCEQR	RT: 79.8
PEF-R2-1_SW_RB4_01_8018	Palladin isoform X4 OS=Sus scrofa OX=9823 GN=PALLD PE=1 SV=1	tr|A0A287BPI5|A0A287BPI5_PIG	52820		-1.5	VFEGMPVTFMCR	RT: 53.35
PEF-R2-1_SW_RB4_01_8018	Palladin isoform X4 OS=Sus scrofa OX=9823 GN=PALLD PE=1 SV=1	tr|A0A287BPI5|A0A287BPI5_PIG	405251		-3.8	VFEGMPVTFMCR	RT: 51.89
PEF-R2-1_SW_RB4_01_8018	Palladin isoform X4 OS=Sus scrofa OX=9823 GN=PALLD PE=1 SV=1	tr|A0A287BPI5|A0A287BPI5_PIG	405536		-3.8	VFEGMPVTFMCR	RT: 51.89
PEF-R2-1_SW_RB4_01_8018	Palladin isoform X4 OS=Sus scrofa OX=9823 GN=PALLD PE=1 SV=1	tr|A0A287BPI5|A0A287BPI5_PIG	175854		-3.5	VFEGMPVTFMCRVTGNPKPK	RT: 140.23
PEF-R2-1_SW_RB4_01_8018	Palladin isoform X4 OS=Sus scrofa OX=9823 GN=PALLD PE=1 SV=1	tr|A0A287BPI5|A0A287BPI5_PIG	42332		2.2	VTGNPKPK	RT: 43.88
PEF-R2-1_SW_RB4_01_8018	Palladin isoform X4 OS=Sus scrofa OX=9823 GN=PALLD PE=1 SV=1	tr|A0A287BPI5|A0A287BPI5_PIG	76836		-0.3	DGKQVSPR	RT: 37.34
PEF-R2-1_SW_RB4_01_8018	Palladin isoform X4 OS=Sus scrofa OX=9823 GN=PALLD PE=1 SV=1	tr|A0A287BPI5|A0A287BPI5_PIG	32357		-4.8	LMVQAVNQR	RT: 78.82
PEF-R2-1_SW_RB4_01_8018	Palladin isoform X4 OS=Sus scrofa OX=9823 GN=PALLD PE=1 SV=1	tr|A0A287BPI5|A0A287BPI5_PIG	68210		-0.8	LMVQAVNQR	RT: 33.3
PEF-R2-1_SW_RB4_01_8018	Palladin isoform X4 OS=Sus scrofa OX=9823 GN=PALLD PE=1 SV=1	tr|A0A287BPI5|A0A287BPI5_PIG	67716		-5.3	LMVQAVNQRGR	RT: 81.4
PEF-R2-1_SW_RB4_01_8018	Palladin isoform X4 OS=Sus scrofa OX=9823 GN=PALLD PE=1 SV=1	tr|A0A287BPI5|A0A287BPI5_PIG	51205		1.4	LMVQAVNQRGR	RT: 54.46
PEF-R2-1_SW_RB4_01_8018	Palladin isoform X4 OS=Sus scrofa OX=9823 GN=PALLD PE=1 SV=1	tr|A0A287BPI5|A0A287BPI5_PIG	37620		6	SPRSPAGHPHGR	RT: 36.5
PEF-R2-1_SW_RB4_01_8018	Palladin isoform X4 OS=Sus scrofa OX=9823 GN=PALLD PE=1 SV=1	tr|A0A287BPI5|A0A287BPI5_PIG	61503		0.3	SPAGHPHGR	RT: 30.03
PEF-R2-1_SW_RB4_01_8018	Palladin isoform X4 OS=Sus scrofa OX=9823 GN=PALLD PE=1 SV=1	tr|A0A287BPI5|A0A287BPI5_PIG	115045		-1.6	SRDSADESEPIQER	RT: 42
PEF-R2-1_SW_RB4_01_8018	Palladin isoform X4 OS=Sus scrofa OX=9823 GN=PALLD PE=1 SV=1	tr|A0A287BPI5|A0A287BPI5_PIG	1444		-3.1	FFRPHFLQAPGDLTVQEGKLCR	RT: 132.36
PEF-R2-1_SW_RB4_01_8018	Palladin isoform X4 OS=Sus scrofa OX=9823 GN=PALLD PE=1 SV=1	tr|A0A287BPI5|A0A287BPI5_PIG	1444		-3.1	FFRPHFLQAPGDLTVQEGKLCR	RT: 132.36
PEF-R2-1_SW_RB4_01_8018	Palladin isoform X4 OS=Sus scrofa OX=9823 GN=PALLD PE=1 SV=1	tr|A0A287BPI5|A0A287BPI5_PIG	3268		-3.5	LCRMDCK	RT: 124.09
PEF-R2-1_SW_RB4_01_8018	Palladin isoform X4 OS=Sus scrofa OX=9823 GN=PALLD PE=1 SV=1	tr|A0A287BPI5|A0A287BPI5_PIG	1653		1	VSGLPTPDLSWQLDGKPIRPDSAHK	RT: 157.94
PEF-R2-1_SW_RB4_01_8018	Palladin isoform X4 OS=Sus scrofa OX=9823 GN=PALLD PE=1 SV=1	tr|A0A287BPI5|A0A287BPI5_PIG	1558		0.7	ENGVHSLIIEPVSAR	RT: 60.58
PEF-R2-1_SW_RB4_01_8018	Palladin isoform X4 OS=Sus scrofa OX=9823 GN=PALLD PE=1 SV=1	tr|A0A287BPI5|A0A287BPI5_PIG	2679		-3.1	DAGIYTCVATNR	RT: 66.36
PEF-R2-1_SW_RB4_01_8018	Palladin isoform X4 OS=Sus scrofa OX=9823 GN=PALLD PE=1 SV=1	tr|A0A287BPI5|A0A287BPI5_PIG	381539		-3	LQNTGVADGYPVR	RT: 51.88
PEF-R2-1_SW_RB4_01_8018	Palladin isoform X4 OS=Sus scrofa OX=9823 GN=PALLD PE=1 SV=1	tr|A0A287BPI5|A0A287BPI5_PIG	532000		-2.7	LQNTGVADGYPVRLECR	RT: 85.28
PEF-R2-1_SW_RB4_01_8018	Palladin isoform X4 OS=Sus scrofa OX=9823 GN=PALLD PE=1 SV=1	tr|A0A287BPI5|A0A287BPI5_PIG	151183		2.8	VAGAPPPQIFWK	RT: 94.68
PEF-R2-1_SW_RB4_01_8018	Palladin isoform X4 OS=Sus scrofa OX=9823 GN=PALLD PE=1 SV=1	tr|A0A287BPI5|A0A287BPI5_PIG	98059		-5.3	KENESLTHSTDR	RT: 78.97
PEF-R2-1_SW_RB4_01_8018	Palladin isoform X4 OS=Sus scrofa OX=9823 GN=PALLD PE=1 SV=1	tr|A0A287BPI5|A0A287BPI5_PIG	10108		-0.6	VSMHQDSHGYVCLLIQGASK	RT: 53.36
PEF-R2-1_SW_RB4_01_8018	Palladin isoform X4 OS=Sus scrofa OX=9823 GN=PALLD PE=1 SV=1	tr|A0A287BPI5|A0A287BPI5_PIG	50787		0.4	NEAGIVSCTAR	RT: 29.68
PEF-R2-1_SW_RB4_01_8018	Palladin isoform X4 OS=Sus scrofa OX=9823 GN=PALLD PE=1 SV=1	tr|A0A287BPI5|A0A287BPI5_PIG	52649		-2.8	RVRPSASR	RT: 33.17
PEF-R2-1_SW_RB4_01_8018	Palladin isoform X4 OS=Sus scrofa OX=9823 GN=PALLD PE=1 SV=1	tr|A0A287BPI5|A0A287BPI5_PIG	20121		-0.5	YAALSDQGLDIR	RT: 83.08
PEF-R2-1_SW_RB4_01_8018	Palladin isoform X4 OS=Sus scrofa OX=9823 GN=PALLD PE=1 SV=1	tr|A0A287BPI5|A0A287BPI5_PIG	1311		-1.7	AAFQPEASPSHLTLSPGLVESEDL	RT: 137.35
PEF-R3-1_SW_RC1_01_8030	Palladin isoform X4 OS=Sus scrofa OX=9823 GN=PALLD PE=1 SV=1	tr|A0A287BPI5|A0A287BPI5_PIG	3728332		-1.4	SLDLARR	RT: 68.44
PEF-R3-1_SW_RC1_01_8030	Palladin isoform X4 OS=Sus scrofa OX=9823 GN=PALLD PE=1 SV=1	tr|A0A287BPI5|A0A287BPI5_PIG	928492		1.8	KPAVSPLLASPSYIR	RT: 93.74
PEF-R3-1_SW_RC1_01_8030	Palladin isoform X4 OS=Sus scrofa OX=9823 GN=PALLD PE=1 SV=1	tr|A0A287BPI5|A0A287BPI5_PIG	928492		1.8	KPAVSPLLASPSYIR	RT: 93.74
PEF-R3-1_SW_RC1_01_8030	Palladin isoform X4 OS=Sus scrofa OX=9823 GN=PALLD PE=1 SV=1	tr|A0A287BPI5|A0A287BPI5_PIG	441693		2.4	APSTSAKPK	RT: 17.69
PEF-R3-1_SW_RC1_01_8030	Palladin isoform X4 OS=Sus scrofa OX=9823 GN=PALLD PE=1 SV=1	tr|A0A287BPI5|A0A287BPI5_PIG	1060808		-3.2	APSTSAKPKATR	RT: 51.21
PEF-R3-1_SW_RC1_01_8030	Palladin isoform X4 OS=Sus scrofa OX=9823 GN=PALLD PE=1 SV=1	tr|A0A287BPI5|A0A287BPI5_PIG	1061777		-3.2	APSTSAKPKATR	RT: 51.21
PEF-R3-1_SW_RC1_01_8030	Palladin isoform X4 OS=Sus scrofa OX=9823 GN=PALLD PE=1 SV=1	tr|A0A287BPI5|A0A287BPI5_PIG	72504		-3.2	HGRPGPQSQLCDK	RT: 58.78
PEF-R3-1_SW_RC1_01_8030	Palladin isoform X4 OS=Sus scrofa OX=9823 GN=PALLD PE=1 SV=1	tr|A0A287BPI5|A0A287BPI5_PIG	673854		-2.5	AASFIEELTSIFR	RT: 45.45
PEF-R3-1_SW_RC1_01_8030	Palladin isoform X4 OS=Sus scrofa OX=9823 GN=PALLD PE=1 SV=1	tr|A0A287BPI5|A0A287BPI5_PIG	478762		2	EAAKPRNR	RT: 72.13
PEF-R3-1_SW_RC1_01_8030	Palladin isoform X4 OS=Sus scrofa OX=9823 GN=PALLD PE=1 SV=1	tr|A0A287BPI5|A0A287BPI5_PIG	62187		3.9	SAPASQSPTGDPPEVDVEAEAK	RT: 70.18
PEF-R3-1_SW_RC1_01_8030	Palladin isoform X4 OS=Sus scrofa OX=9823 GN=PALLD PE=1 SV=1	tr|A0A287BPI5|A0A287BPI5_PIG	73587		0.5	LPVTGHHSSAAR	RT: 25.55
PEF-R3-1_SW_RC1_01_8030	Palladin isoform X4 OS=Sus scrofa OX=9823 GN=PALLD PE=1 SV=1	tr|A0A287BPI5|A0A287BPI5_PIG	1215031		0.9	SSRSPSPPPPLSAR	RT: 50.93
PEF-R3-1_SW_RC1_01_8030	Palladin isoform X4 OS=Sus scrofa OX=9823 GN=PALLD PE=1 SV=1	tr|A0A287BPI5|A0A287BPI5_PIG	2115536		0.2	SPSPPPPLSAR	RT: 69
PEF-R3-1_SW_RC1_01_8030	Palladin isoform X4 OS=Sus scrofa OX=9823 GN=PALLD PE=1 SV=1	tr|A0A287BPI5|A0A287BPI5_PIG	56297		1.5	LRSQEVAEGSR	RT: 214.66
PEF-R3-1_SW_RC1_01_8030	Palladin isoform X4 OS=Sus scrofa OX=9823 GN=PALLD PE=1 SV=1	tr|A0A287BPI5|A0A287BPI5_PIG	3835606		0.5	SQEVAEGSR	RT: 68.23
PEF-R3-1_SW_RC1_01_8030	Palladin isoform X4 OS=Sus scrofa OX=9823 GN=PALLD PE=1 SV=1	tr|A0A287BPI5|A0A287BPI5_PIG	335027		-3	VYLECRVTGTPAPR	RT: 37.44
PEF-R3-1_SW_RC1_01_8030	Palladin isoform X4 OS=Sus scrofa OX=9823 GN=PALLD PE=1 SV=1	tr|A0A287BPI5|A0A287BPI5_PIG	3654612		-1.5	VTGTPAPR	RT: 68.37
PEF-R3-1_SW_RC1_01_8030	Palladin isoform X4 OS=Sus scrofa OX=9823 GN=PALLD PE=1 SV=1	tr|A0A287BPI5|A0A287BPI5_PIG	55556		-1.6	SKPGAMPQAQK	RT: 45.72
PEF-R3-1_SW_RC1_01_8030	Palladin isoform X4 OS=Sus scrofa OX=9823 GN=PALLD PE=1 SV=1	tr|A0A287BPI5|A0A287BPI5_PIG	104747		-0.6	SKPGAMPQAQK	RT: 42.24
PEF-R3-1_SW_RC1_01_8030	Palladin isoform X4 OS=Sus scrofa OX=9823 GN=PALLD PE=1 SV=1	tr|A0A287BPI5|A0A287BPI5_PIG	116736		1.5	TTSVSLTIGSSSPK	RT: 49.76
PEF-R3-1_SW_RC1_01_8030	Palladin isoform X4 OS=Sus scrofa OX=9823 GN=PALLD PE=1 SV=1	tr|A0A287BPI5|A0A287BPI5_PIG	17689		2.1	ELQSIAATEGQVVVLECRVR	RT: 202.33
PEF-R3-1_SW_RC1_01_8030	Palladin isoform X4 OS=Sus scrofa OX=9823 GN=PALLD PE=1 SV=1	tr|A0A287BPI5|A0A287BPI5_PIG	1343471		-0.3	VRGAPPLQVR	RT: 51.27
PEF-R3-1_SW_RC1_01_8030	Palladin isoform X4 OS=Sus scrofa OX=9823 GN=PALLD PE=1 SV=1	tr|A0A287BPI5|A0A287BPI5_PIG	758100		-4.2	GAPPLQVR	RT: 17.76
PEF-R3-1_SW_RC1_01_8030	Palladin isoform X4 OS=Sus scrofa OX=9823 GN=PALLD PE=1 SV=1	tr|A0A287BPI5|A0A287BPI5_PIG	233662		-1.6	QGSEIQDSPDFR	RT: 56.77
PEF-R3-1_SW_RC1_01_8030	Palladin isoform X4 OS=Sus scrofa OX=9823 GN=PALLD PE=1 SV=1	tr|A0A287BPI5|A0A287BPI5_PIG	294918		-1.4	ILQKKPR	RT: 32.71
PEF-R3-1_SW_RC1_01_8030	Palladin isoform X4 OS=Sus scrofa OX=9823 GN=PALLD PE=1 SV=1	tr|A0A287BPI5|A0A287BPI5_PIG	6612		2.5	EPNGVHASHGHGMNGLVNGK	RT: 108.29
PEF-R3-1_SW_RC1_01_8030	Palladin isoform X4 OS=Sus scrofa OX=9823 GN=PALLD PE=1 SV=1	tr|A0A287BPI5|A0A287BPI5_PIG	19019		5.5	AMQASGSFSYARPK	RT: 89.78
PEF-R3-1_SW_RC1_01_8030	Palladin isoform X4 OS=Sus scrofa OX=9823 GN=PALLD PE=1 SV=1	tr|A0A287BPI5|A0A287BPI5_PIG	56601		0.3	QFIAAQSLSPGSPASPTPPAGR	RT: 107.02
PEF-R3-1_SW_RC1_01_8030	Palladin isoform X4 OS=Sus scrofa OX=9823 GN=PALLD PE=1 SV=1	tr|A0A287BPI5|A0A287BPI5_PIG	589		-2.2	SGPGPAPAALLCALLPSPPAAATVPTTVSALGLPR	RT: 182.62
PEF-R3-1_SW_RC1_01_8030	Palladin isoform X4 OS=Sus scrofa OX=9823 GN=PALLD PE=1 SV=1	tr|A0A287BPI5|A0A287BPI5_PIG	2470		0.2	SGPGPAPAALLCALLPSPPAAATVPTTVSALGLPR	RT: 182.62
PEF-R3-1_SW_RC1_01_8030	Palladin isoform X4 OS=Sus scrofa OX=9823 GN=PALLD PE=1 SV=1	tr|A0A287BPI5|A0A287BPI5_PIG	227107		-0.3	AAPAAAFPK	RT: 41.41
PEF-R3-1_SW_RC1_01_8030	Palladin isoform X4 OS=Sus scrofa OX=9823 GN=PALLD PE=1 SV=1	tr|A0A287BPI5|A0A287BPI5_PIG	54055		2.9	TTRMASDEEIQGSK	RT: 57.33
PEF-R3-1_SW_RC1_01_8030	Palladin isoform X4 OS=Sus scrofa OX=9823 GN=PALLD PE=1 SV=1	tr|A0A287BPI5|A0A287BPI5_PIG	26771		-0.9	TTRMASDEEIQGSK	RT: 77.42
PEF-R3-1_SW_RC1_01_8030	Palladin isoform X4 OS=Sus scrofa OX=9823 GN=PALLD PE=1 SV=1	tr|A0A287BPI5|A0A287BPI5_PIG	23693		-0.9	MASDEEIQGSKDAVIQDLER	RT: 84.29
PEF-R3-1_SW_RC1_01_8030	Palladin isoform X4 OS=Sus scrofa OX=9823 GN=PALLD PE=1 SV=1	tr|A0A287BPI5|A0A287BPI5_PIG	1372864		3.8	DAVIQDLER	RT: 64.34
PEF-R3-1_SW_RC1_01_8030	Palladin isoform X4 OS=Sus scrofa OX=9823 GN=PALLD PE=1 SV=1	tr|A0A287BPI5|A0A287BPI5_PIG	877496		-4	FKEDLLNNGQPR	RT: 51.55
PEF-R3-1_SW_RC1_01_8030	Palladin isoform X4 OS=Sus scrofa OX=9823 GN=PALLD PE=1 SV=1	tr|A0A287BPI5|A0A287BPI5_PIG	4192749		-1.6	EDLLNNGQPR	RT: 68.44
PEF-R3-1_SW_RC1_01_8030	Palladin isoform X4 OS=Sus scrofa OX=9823 GN=PALLD PE=1 SV=1	tr|A0A287BPI5|A0A287BPI5_PIG	366016		-0.7	LTYEERMAR	RT: 40.65
PEF-R3-1_SW_RC1_01_8030	Palladin isoform X4 OS=Sus scrofa OX=9823 GN=PALLD PE=1 SV=1	tr|A0A287BPI5|A0A287BPI5_PIG	521512		1.3	VSSCEQR	RT: 77.35
PEF-R3-1_SW_RC1_01_8030	Palladin isoform X4 OS=Sus scrofa OX=9823 GN=PALLD PE=1 SV=1	tr|A0A287BPI5|A0A287BPI5_PIG	1227970		-3.2	VFEGMPVTFMCR	RT: 50.79
PEF-R3-1_SW_RC1_01_8030	Palladin isoform X4 OS=Sus scrofa OX=9823 GN=PALLD PE=1 SV=1	tr|A0A287BPI5|A0A287BPI5_PIG	2463065		0.8	VFEGMPVTFMCR	RT: 68.72
PEF-R3-1_SW_RC1_01_8030	Palladin isoform X4 OS=Sus scrofa OX=9823 GN=PALLD PE=1 SV=1	tr|A0A287BPI5|A0A287BPI5_PIG	2529850		0.9	VFEGMPVTFMCR	RT: 68.72
PEF-R3-1_SW_RC1_01_8030	Palladin isoform X4 OS=Sus scrofa OX=9823 GN=PALLD PE=1 SV=1	tr|A0A287BPI5|A0A287BPI5_PIG	235030		-5.2	VFEGMPVTFMCRVTGNPKPK	RT: 138.45
PEF-R3-1_SW_RC1_01_8030	Palladin isoform X4 OS=Sus scrofa OX=9823 GN=PALLD PE=1 SV=1	tr|A0A287BPI5|A0A287BPI5_PIG	1597824		-5.6	VTGNPKPK	RT: 64.48
PEF-R3-1_SW_RC1_01_8030	Palladin isoform X4 OS=Sus scrofa OX=9823 GN=PALLD PE=1 SV=1	tr|A0A287BPI5|A0A287BPI5_PIG	4160791		-1.6	DGKQVSPR	RT: 68.44
PEF-R3-1_SW_RC1_01_8030	Palladin isoform X4 OS=Sus scrofa OX=9823 GN=PALLD PE=1 SV=1	tr|A0A287BPI5|A0A287BPI5_PIG	451326		3.5	LMVQAVNQR	RT: 77.62
PEF-R3-1_SW_RC1_01_8030	Palladin isoform X4 OS=Sus scrofa OX=9823 GN=PALLD PE=1 SV=1	tr|A0A287BPI5|A0A287BPI5_PIG	272403		-2.4	LMVQAVNQR	RT: 33.69
PEF-R3-1_SW_RC1_01_8030	Palladin isoform X4 OS=Sus scrofa OX=9823 GN=PALLD PE=1 SV=1	tr|A0A287BPI5|A0A287BPI5_PIG	670434		-3.4	LMVQAVNQRGR	RT: 85.47
PEF-R3-1_SW_RC1_01_8030	Palladin isoform X4 OS=Sus scrofa OX=9823 GN=PALLD PE=1 SV=1	tr|A0A287BPI5|A0A287BPI5_PIG	4340265		-1.3	LMVQAVNQRGR	RT: 68.38
PEF-R3-1_SW_RC1_01_8030	Palladin isoform X4 OS=Sus scrofa OX=9823 GN=PALLD PE=1 SV=1	tr|A0A287BPI5|A0A287BPI5_PIG	294975		-3.8	SPRSPAGHPHGR	RT: 39.18
PEF-R3-1_SW_RC1_01_8030	Palladin isoform X4 OS=Sus scrofa OX=9823 GN=PALLD PE=1 SV=1	tr|A0A287BPI5|A0A287BPI5_PIG	2083882		-4.7	SPAGHPHGR	RT: 17.69
PEF-R3-1_SW_RC1_01_8030	Palladin isoform X4 OS=Sus scrofa OX=9823 GN=PALLD PE=1 SV=1	tr|A0A287BPI5|A0A287BPI5_PIG	762736		-1	SRDSADESEPIQER	RT: 45.52
PEF-R3-1_SW_RC1_01_8030	Palladin isoform X4 OS=Sus scrofa OX=9823 GN=PALLD PE=1 SV=1	tr|A0A287BPI5|A0A287BPI5_PIG	307724		2.2	FFRPHFLQAPGDLTVQEGKLCR	RT: 132.45
PEF-R3-1_SW_RC1_01_8030	Palladin isoform X4 OS=Sus scrofa OX=9823 GN=PALLD PE=1 SV=1	tr|A0A287BPI5|A0A287BPI5_PIG	307686		2.2	FFRPHFLQAPGDLTVQEGKLCR	RT: 132.45
PEF-R3-1_SW_RC1_01_8030	Palladin isoform X4 OS=Sus scrofa OX=9823 GN=PALLD PE=1 SV=1	tr|A0A287BPI5|A0A287BPI5_PIG	10963		-5	LCRMDCK	RT: 123.84
PEF-R3-1_SW_RC1_01_8030	Palladin isoform X4 OS=Sus scrofa OX=9823 GN=PALLD PE=1 SV=1	tr|A0A287BPI5|A0A287BPI5_PIG	21204		-0.8	VSGLPTPDLSWQLDGKPIRPDSAHK	RT: 160.37
PEF-R3-1_SW_RC1_01_8030	Palladin isoform X4 OS=Sus scrofa OX=9823 GN=PALLD PE=1 SV=1	tr|A0A287BPI5|A0A287BPI5_PIG	1007437		-2.8	ENGVHSLIIEPVSAR	RT: 65.87
PEF-R3-1_SW_RC1_01_8030	Palladin isoform X4 OS=Sus scrofa OX=9823 GN=PALLD PE=1 SV=1	tr|A0A287BPI5|A0A287BPI5_PIG	2834154		-2	DAGIYTCVATNR	RT: 68.65
PEF-R3-1_SW_RC1_01_8030	Palladin isoform X4 OS=Sus scrofa OX=9823 GN=PALLD PE=1 SV=1	tr|A0A287BPI5|A0A287BPI5_PIG	3371835		0.6	LQNTGVADGYPVR	RT: 68.24
PEF-R3-1_SW_RC1_01_8030	Palladin isoform X4 OS=Sus scrofa OX=9823 GN=PALLD PE=1 SV=1	tr|A0A287BPI5|A0A287BPI5_PIG	3631299		-1.6	LQNTGVADGYPVRLECR	RT: 68.37
PEF-R3-1_SW_RC1_01_8030	Palladin isoform X4 OS=Sus scrofa OX=9823 GN=PALLD PE=1 SV=1	tr|A0A287BPI5|A0A287BPI5_PIG	18658		3.5	VAGAPPPQIFWK	RT: 94.65
PEF-R3-1_SW_RC1_01_8030	Palladin isoform X4 OS=Sus scrofa OX=9823 GN=PALLD PE=1 SV=1	tr|A0A287BPI5|A0A287BPI5_PIG	433200		-0.4	KENESLTHSTDR	RT: 81.73
PEF-R3-1_SW_RC1_01_8030	Palladin isoform X4 OS=Sus scrofa OX=9823 GN=PALLD PE=1 SV=1	tr|A0A287BPI5|A0A287BPI5_PIG	45657		6.1	VSMHQDSHGYVCLLIQGASK	RT: 51.43
PEF-R3-1_SW_RC1_01_8030	Palladin isoform X4 OS=Sus scrofa OX=9823 GN=PALLD PE=1 SV=1	tr|A0A287BPI5|A0A287BPI5_PIG	520771		0	NEAGIVSCTAR	RT: 41.41
PEF-R3-1_SW_RC1_01_8030	Palladin isoform X4 OS=Sus scrofa OX=9823 GN=PALLD PE=1 SV=1	tr|A0A287BPI5|A0A287BPI5_PIG	360620		-2.9	RVRPSASR	RT: 37.37
PEF-R3-1_SW_RC1_01_8030	Palladin isoform X4 OS=Sus scrofa OX=9823 GN=PALLD PE=1 SV=1	tr|A0A287BPI5|A0A287BPI5_PIG	42731		1.8	YAALSDQGLDIR	RT: 80.61
PEF-R3-1_SW_RC1_01_8030	Palladin isoform X4 OS=Sus scrofa OX=9823 GN=PALLD PE=1 SV=1	tr|A0A287BPI5|A0A287BPI5_PIG	34751		2.3	AAFQPEASPSHLTLSPGLVESEDL	RT: 137.04

## Sheet: A0A4X1TG97
Replicate	Protein Description	Protein Name	Total Area		Average Mass Error PPM	Peptide Sequence	Peptide Result
iNS15-R1-1_SW_RB1_01_8014	Cytochrome c oxidase subunit OS=Sus scrofa OX=9823 GN=COX6B PE=3 SV=1	tr|A0A4X1TG97|A0A4X1TG97_PIG	23750		-2	MAEDIQTK	RT: 175.88
iNS15-R1-1_SW_RB1_01_8014	Cytochrome c oxidase subunit OS=Sus scrofa OX=9823 GN=COX6B PE=3 SV=1	tr|A0A4X1TG97|A0A4X1TG97_PIG	36803		-5.2	MAEDIQTKIK	RT: 83.17
iNS15-R1-1_SW_RB1_01_8014	Cytochrome c oxidase subunit OS=Sus scrofa OX=9823 GN=COX6B PE=3 SV=1	tr|A0A4X1TG97|A0A4X1TG97_PIG	230945		-9.3	FPNQNQTR	RT: 49.22
iNS15-R1-1_SW_RB1_01_8014	Cytochrome c oxidase subunit OS=Sus scrofa OX=9823 GN=COX6B PE=3 SV=1	tr|A0A4X1TG97|A0A4X1TG97_PIG	97128		-5.2	NCWQNYLDFHR	RT: 82.05
iNS15-R1-1_SW_RB1_01_8014	Cytochrome c oxidase subunit OS=Sus scrofa OX=9823 GN=COX6B PE=3 SV=1	tr|A0A4X1TG97|A0A4X1TG97_PIG	100244		-5.1	NCWQNYLDFHR	RT: 82.05
iNS15-R1-1_SW_RB1_01_8014	Cytochrome c oxidase subunit OS=Sus scrofa OX=9823 GN=COX6B PE=3 SV=1	tr|A0A4X1TG97|A0A4X1TG97_PIG	26486		-2.5	NCWQNYLDFHRCEK	RT: 74.34
iNS15-R1-1_SW_RB1_01_8014	Cytochrome c oxidase subunit OS=Sus scrofa OX=9823 GN=COX6B PE=3 SV=1	tr|A0A4X1TG97|A0A4X1TG97_PIG	61636		-4.1	CEKAMTAK	RT: 45.68
iNS15-R1-1_SW_RB1_01_8014	Cytochrome c oxidase subunit OS=Sus scrofa OX=9823 GN=COX6B PE=3 SV=1	tr|A0A4X1TG97|A0A4X1TG97_PIG	116394		-4.9	GGDVSVCEWYRR	RT: 61.68
iNS15-R1-1_SW_RB1_01_8014	Cytochrome c oxidase subunit OS=Sus scrofa OX=9823 GN=COX6B PE=3 SV=1	tr|A0A4X1TG97|A0A4X1TG97_PIG	122664		-4.5	GGDVSVCEWYRR	RT: 61.68
iNS15-R1-1_SW_RB1_01_8014	Cytochrome c oxidase subunit OS=Sus scrofa OX=9823 GN=COX6B PE=3 SV=1	tr|A0A4X1TG97|A0A4X1TG97_PIG	110466		-3.3	SLCPISWVSAWDDR	RT: 128.56
iNS15-R1-1_SW_RB1_01_8014	Cytochrome c oxidase subunit OS=Sus scrofa OX=9823 GN=COX6B PE=3 SV=1	tr|A0A4X1TG97|A0A4X1TG97_PIG	570209		-2.5	SLCPISWVSAWDDRR	RT: 108.81
iNS15-R1-1_SW_RB1_01_8014	Cytochrome c oxidase subunit OS=Sus scrofa OX=9823 GN=COX6B PE=3 SV=1	tr|A0A4X1TG97|A0A4X1TG97_PIG	71630		-5.4	AEGTFPGK	RT: 46.51
iNS15-R1-1_SW_RB1_01_8014	Cytochrome c oxidase subunit OS=Sus scrofa OX=9823 GN=COX6B PE=3 SV=1	tr|A0A4X1TG97|A0A4X1TG97_PIG	78565		-6.4	AEGTFPGKI	RT: 54.85
iNS15-R2-1_SW_RB6_01_8020	Cytochrome c oxidase subunit OS=Sus scrofa OX=9823 GN=COX6B PE=3 SV=1	tr|A0A4X1TG97|A0A4X1TG97_PIG	3154		-1.8	MAEDIQTK	RT: 176.32
iNS15-R2-1_SW_RB6_01_8020	Cytochrome c oxidase subunit OS=Sus scrofa OX=9823 GN=COX6B PE=3 SV=1	tr|A0A4X1TG97|A0A4X1TG97_PIG	12673		-6.9	MAEDIQTKIK	RT: 82.36
iNS15-R2-1_SW_RB6_01_8020	Cytochrome c oxidase subunit OS=Sus scrofa OX=9823 GN=COX6B PE=3 SV=1	tr|A0A4X1TG97|A0A4X1TG97_PIG	57665		0.7	FPNQNQTR	RT: 52.24
iNS15-R2-1_SW_RB6_01_8020	Cytochrome c oxidase subunit OS=Sus scrofa OX=9823 GN=COX6B PE=3 SV=1	tr|A0A4X1TG97|A0A4X1TG97_PIG	45486		1.1	NCWQNYLDFHR	RT: 88.5
iNS15-R2-1_SW_RB6_01_8020	Cytochrome c oxidase subunit OS=Sus scrofa OX=9823 GN=COX6B PE=3 SV=1	tr|A0A4X1TG97|A0A4X1TG97_PIG	45524		1.2	NCWQNYLDFHR	RT: 88.5
iNS15-R2-1_SW_RB6_01_8020	Cytochrome c oxidase subunit OS=Sus scrofa OX=9823 GN=COX6B PE=3 SV=1	tr|A0A4X1TG97|A0A4X1TG97_PIG	3135		0.3	NCWQNYLDFHRCEK	RT: 74.03
iNS15-R2-1_SW_RB6_01_8020	Cytochrome c oxidase subunit OS=Sus scrofa OX=9823 GN=COX6B PE=3 SV=1	tr|A0A4X1TG97|A0A4X1TG97_PIG	9671		2.5	CEKAMTAK	RT: 83.35
iNS15-R2-1_SW_RB6_01_8020	Cytochrome c oxidase subunit OS=Sus scrofa OX=9823 GN=COX6B PE=3 SV=1	tr|A0A4X1TG97|A0A4X1TG97_PIG	399		-6.1	GGDVSVCEWYRR	RT: 66.3
iNS15-R2-1_SW_RB6_01_8020	Cytochrome c oxidase subunit OS=Sus scrofa OX=9823 GN=COX6B PE=3 SV=1	tr|A0A4X1TG97|A0A4X1TG97_PIG	1368		-4.9	GGDVSVCEWYRR	RT: 66.3
iNS15-R2-1_SW_RB6_01_8020	Cytochrome c oxidase subunit OS=Sus scrofa OX=9823 GN=COX6B PE=3 SV=1	tr|A0A4X1TG97|A0A4X1TG97_PIG	361		2.1	SLCPISWVSAWDDR	RT: 131.35
iNS15-R2-1_SW_RB6_01_8020	Cytochrome c oxidase subunit OS=Sus scrofa OX=9823 GN=COX6B PE=3 SV=1	tr|A0A4X1TG97|A0A4X1TG97_PIG	58824		1	SLCPISWVSAWDDRR	RT: 110.32
iNS15-R2-1_SW_RB6_01_8020	Cytochrome c oxidase subunit OS=Sus scrofa OX=9823 GN=COX6B PE=3 SV=1	tr|A0A4X1TG97|A0A4X1TG97_PIG	18126		-7.8	AEGTFPGK	RT: 48.97
iNS15-R2-1_SW_RB6_01_8020	Cytochrome c oxidase subunit OS=Sus scrofa OX=9823 GN=COX6B PE=3 SV=1	tr|A0A4X1TG97|A0A4X1TG97_PIG	1976		0.7	AEGTFPGKI	RT: 53.03
iNS15-R3-1_SW_RC3_01_8032	Cytochrome c oxidase subunit OS=Sus scrofa OX=9823 GN=COX6B PE=3 SV=1	tr|A0A4X1TG97|A0A4X1TG97_PIG	24225		-3.6	MAEDIQTK	RT: 176.48
iNS15-R3-1_SW_RC3_01_8032	Cytochrome c oxidase subunit OS=Sus scrofa OX=9823 GN=COX6B PE=3 SV=1	tr|A0A4X1TG97|A0A4X1TG97_PIG	102771		-5	MAEDIQTKIK	RT: 83.81
iNS15-R3-1_SW_RC3_01_8032	Cytochrome c oxidase subunit OS=Sus scrofa OX=9823 GN=COX6B PE=3 SV=1	tr|A0A4X1TG97|A0A4X1TG97_PIG	1081271		-0.3	FPNQNQTR	RT: 51.27
iNS15-R3-1_SW_RC3_01_8032	Cytochrome c oxidase subunit OS=Sus scrofa OX=9823 GN=COX6B PE=3 SV=1	tr|A0A4X1TG97|A0A4X1TG97_PIG	519175		5.6	NCWQNYLDFHR	RT: 85.26
iNS15-R3-1_SW_RC3_01_8032	Cytochrome c oxidase subunit OS=Sus scrofa OX=9823 GN=COX6B PE=3 SV=1	tr|A0A4X1TG97|A0A4X1TG97_PIG	532209		5.4	NCWQNYLDFHR	RT: 85.26
iNS15-R3-1_SW_RC3_01_8032	Cytochrome c oxidase subunit OS=Sus scrofa OX=9823 GN=COX6B PE=3 SV=1	tr|A0A4X1TG97|A0A4X1TG97_PIG	17043		-1.3	NCWQNYLDFHRCEK	RT: 73.38
iNS15-R3-1_SW_RC3_01_8032	Cytochrome c oxidase subunit OS=Sus scrofa OX=9823 GN=COX6B PE=3 SV=1	tr|A0A4X1TG97|A0A4X1TG97_PIG	39387		-4.1	CEKAMTAK	RT: 45.66
iNS15-R3-1_SW_RC3_01_8032	Cytochrome c oxidase subunit OS=Sus scrofa OX=9823 GN=COX6B PE=3 SV=1	tr|A0A4X1TG97|A0A4X1TG97_PIG	2199725		-1.6	GGDVSVCEWYRR	RT: 68.86
iNS15-R3-1_SW_RC3_01_8032	Cytochrome c oxidase subunit OS=Sus scrofa OX=9823 GN=COX6B PE=3 SV=1	tr|A0A4X1TG97|A0A4X1TG97_PIG	2176925		-1.6	GGDVSVCEWYRR	RT: 68.86
iNS15-R3-1_SW_RC3_01_8032	Cytochrome c oxidase subunit OS=Sus scrofa OX=9823 GN=COX6B PE=3 SV=1	tr|A0A4X1TG97|A0A4X1TG97_PIG	473556		1.3	SLCPISWVSAWDDR	RT: 132.45
iNS15-R3-1_SW_RC3_01_8032	Cytochrome c oxidase subunit OS=Sus scrofa OX=9823 GN=COX6B PE=3 SV=1	tr|A0A4X1TG97|A0A4X1TG97_PIG	294728		-2.9	SLCPISWVSAWDDRR	RT: 113.48
iNS15-R3-1_SW_RC3_01_8032	Cytochrome c oxidase subunit OS=Sus scrofa OX=9823 GN=COX6B PE=3 SV=1	tr|A0A4X1TG97|A0A4X1TG97_PIG	233073		-3.7	AEGTFPGK	RT: 44.81
iNS15-R3-1_SW_RC3_01_8032	Cytochrome c oxidase subunit OS=Sus scrofa OX=9823 GN=COX6B PE=3 SV=1	tr|A0A4X1TG97|A0A4X1TG97_PIG	171912		-3.6	AEGTFPGKI	RT: 54.9
iNS7-R1-1_SW_RA8_01_8013	Cytochrome c oxidase subunit OS=Sus scrofa OX=9823 GN=COX6B PE=3 SV=1	tr|A0A4X1TG97|A0A4X1TG97_PIG	27911		1.6	MAEDIQTK	RT: 174.72
iNS7-R1-1_SW_RA8_01_8013	Cytochrome c oxidase subunit OS=Sus scrofa OX=9823 GN=COX6B PE=3 SV=1	tr|A0A4X1TG97|A0A4X1TG97_PIG	39539		1.6	MAEDIQTKIK	RT: 82.59
iNS7-R1-1_SW_RA8_01_8013	Cytochrome c oxidase subunit OS=Sus scrofa OX=9823 GN=COX6B PE=3 SV=1	tr|A0A4X1TG97|A0A4X1TG97_PIG	681055		-3.6	FPNQNQTR	RT: 53.04
iNS7-R1-1_SW_RA8_01_8013	Cytochrome c oxidase subunit OS=Sus scrofa OX=9823 GN=COX6B PE=3 SV=1	tr|A0A4X1TG97|A0A4X1TG97_PIG	2229916		-8	NCWQNYLDFHR	RT: 84.59
iNS7-R1-1_SW_RA8_01_8013	Cytochrome c oxidase subunit OS=Sus scrofa OX=9823 GN=COX6B PE=3 SV=1	tr|A0A4X1TG97|A0A4X1TG97_PIG	2228510		-8	NCWQNYLDFHR	RT: 84.59
iNS7-R1-1_SW_RA8_01_8013	Cytochrome c oxidase subunit OS=Sus scrofa OX=9823 GN=COX6B PE=3 SV=1	tr|A0A4X1TG97|A0A4X1TG97_PIG	184414		4.7	NCWQNYLDFHRCEK	RT: 70.84
iNS7-R1-1_SW_RA8_01_8013	Cytochrome c oxidase subunit OS=Sus scrofa OX=9823 GN=COX6B PE=3 SV=1	tr|A0A4X1TG97|A0A4X1TG97_PIG	55195		4	CEKAMTAK	RT: 70.7
iNS7-R1-1_SW_RA8_01_8013	Cytochrome c oxidase subunit OS=Sus scrofa OX=9823 GN=COX6B PE=3 SV=1	tr|A0A4X1TG97|A0A4X1TG97_PIG	1536891		-6	GGDVSVCEWYRR	RT: 68.47
iNS7-R1-1_SW_RA8_01_8013	Cytochrome c oxidase subunit OS=Sus scrofa OX=9823 GN=COX6B PE=3 SV=1	tr|A0A4X1TG97|A0A4X1TG97_PIG	1557962		-6	GGDVSVCEWYRR	RT: 68.47
iNS7-R1-1_SW_RA8_01_8013	Cytochrome c oxidase subunit OS=Sus scrofa OX=9823 GN=COX6B PE=3 SV=1	tr|A0A4X1TG97|A0A4X1TG97_PIG	237177		-4	SLCPISWVSAWDDR	RT: 131.03
iNS7-R1-1_SW_RA8_01_8013	Cytochrome c oxidase subunit OS=Sus scrofa OX=9823 GN=COX6B PE=3 SV=1	tr|A0A4X1TG97|A0A4X1TG97_PIG	581723		-4.6	SLCPISWVSAWDDRR	RT: 111.02
iNS7-R1-1_SW_RA8_01_8013	Cytochrome c oxidase subunit OS=Sus scrofa OX=9823 GN=COX6B PE=3 SV=1	tr|A0A4X1TG97|A0A4X1TG97_PIG	85424		2.4	AEGTFPGK	RT: 47.82
iNS7-R1-1_SW_RA8_01_8013	Cytochrome c oxidase subunit OS=Sus scrofa OX=9823 GN=COX6B PE=3 SV=1	tr|A0A4X1TG97|A0A4X1TG97_PIG	100833		-3.9	AEGTFPGKI	RT: 56.93
iNS7-R2-1_SW_RB5_01_8019	Cytochrome c oxidase subunit OS=Sus scrofa OX=9823 GN=COX6B PE=3 SV=1	tr|A0A4X1TG97|A0A4X1TG97_PIG	3116		1.5	MAEDIQTK	RT: 175.33
iNS7-R2-1_SW_RB5_01_8019	Cytochrome c oxidase subunit OS=Sus scrofa OX=9823 GN=COX6B PE=3 SV=1	tr|A0A4X1TG97|A0A4X1TG97_PIG	53333		-1.8	MAEDIQTKIK	RT: 84.5
iNS7-R2-1_SW_RB5_01_8019	Cytochrome c oxidase subunit OS=Sus scrofa OX=9823 GN=COX6B PE=3 SV=1	tr|A0A4X1TG97|A0A4X1TG97_PIG	731519		-6.9	FPNQNQTR	RT: 48.53
iNS7-R2-1_SW_RB5_01_8019	Cytochrome c oxidase subunit OS=Sus scrofa OX=9823 GN=COX6B PE=3 SV=1	tr|A0A4X1TG97|A0A4X1TG97_PIG	179626		-4.5	NCWQNYLDFHR	RT: 81.57
iNS7-R2-1_SW_RB5_01_8019	Cytochrome c oxidase subunit OS=Sus scrofa OX=9823 GN=COX6B PE=3 SV=1	tr|A0A4X1TG97|A0A4X1TG97_PIG	190437		-4.1	NCWQNYLDFHR	RT: 81.57
iNS7-R2-1_SW_RB5_01_8019	Cytochrome c oxidase subunit OS=Sus scrofa OX=9823 GN=COX6B PE=3 SV=1	tr|A0A4X1TG97|A0A4X1TG97_PIG	26847		-2.3	NCWQNYLDFHRCEK	RT: 73.1
iNS7-R2-1_SW_RB5_01_8019	Cytochrome c oxidase subunit OS=Sus scrofa OX=9823 GN=COX6B PE=3 SV=1	tr|A0A4X1TG97|A0A4X1TG97_PIG	49457		5.5	CEKAMTAK	RT: 54.32
iNS7-R2-1_SW_RB5_01_8019	Cytochrome c oxidase subunit OS=Sus scrofa OX=9823 GN=COX6B PE=3 SV=1	tr|A0A4X1TG97|A0A4X1TG97_PIG	357561		-4.6	GGDVSVCEWYRR	RT: 60.91
iNS7-R2-1_SW_RB5_01_8019	Cytochrome c oxidase subunit OS=Sus scrofa OX=9823 GN=COX6B PE=3 SV=1	tr|A0A4X1TG97|A0A4X1TG97_PIG	361380		-4.6	GGDVSVCEWYRR	RT: 60.91
iNS7-R2-1_SW_RB5_01_8019	Cytochrome c oxidase subunit OS=Sus scrofa OX=9823 GN=COX6B PE=3 SV=1	tr|A0A4X1TG97|A0A4X1TG97_PIG	5225		-1.4	SLCPISWVSAWDDR	RT: 130.35
iNS7-R2-1_SW_RB5_01_8019	Cytochrome c oxidase subunit OS=Sus scrofa OX=9823 GN=COX6B PE=3 SV=1	tr|A0A4X1TG97|A0A4X1TG97_PIG	8417		1.9	SLCPISWVSAWDDRR	RT: 109.68
iNS7-R2-1_SW_RB5_01_8019	Cytochrome c oxidase subunit OS=Sus scrofa OX=9823 GN=COX6B PE=3 SV=1	tr|A0A4X1TG97|A0A4X1TG97_PIG	84075		-5.5	AEGTFPGK	RT: 48.47
iNS7-R2-1_SW_RB5_01_8019	Cytochrome c oxidase subunit OS=Sus scrofa OX=9823 GN=COX6B PE=3 SV=1	tr|A0A4X1TG97|A0A4X1TG97_PIG	91884		-3.3	AEGTFPGKI	RT: 58.06
iNS7-R3-1_SW_RC5_01_8031	Cytochrome c oxidase subunit OS=Sus scrofa OX=9823 GN=COX6B PE=3 SV=1	tr|A0A4X1TG97|A0A4X1TG97_PIG	11210		2	MAEDIQTK	RT: 176.2
iNS7-R3-1_SW_RC5_01_8031	Cytochrome c oxidase subunit OS=Sus scrofa OX=9823 GN=COX6B PE=3 SV=1	tr|A0A4X1TG97|A0A4X1TG97_PIG	29849		-3.3	MAEDIQTKIK	RT: 82.74
iNS7-R3-1_SW_RC5_01_8031	Cytochrome c oxidase subunit OS=Sus scrofa OX=9823 GN=COX6B PE=3 SV=1	tr|A0A4X1TG97|A0A4X1TG97_PIG	156332		-1.2	FPNQNQTR	RT: 53.26
iNS7-R3-1_SW_RC5_01_8031	Cytochrome c oxidase subunit OS=Sus scrofa OX=9823 GN=COX6B PE=3 SV=1	tr|A0A4X1TG97|A0A4X1TG97_PIG	29165		-2.4	NCWQNYLDFHR	RT: 82.25
iNS7-R3-1_SW_RC5_01_8031	Cytochrome c oxidase subunit OS=Sus scrofa OX=9823 GN=COX6B PE=3 SV=1	tr|A0A4X1TG97|A0A4X1TG97_PIG	28348		-2.6	NCWQNYLDFHR	RT: 82.25
iNS7-R3-1_SW_RC5_01_8031	Cytochrome c oxidase subunit OS=Sus scrofa OX=9823 GN=COX6B PE=3 SV=1	tr|A0A4X1TG97|A0A4X1TG97_PIG	37202		0.1	NCWQNYLDFHRCEK	RT: 70.71
iNS7-R3-1_SW_RC5_01_8031	Cytochrome c oxidase subunit OS=Sus scrofa OX=9823 GN=COX6B PE=3 SV=1	tr|A0A4X1TG97|A0A4X1TG97_PIG	69426		1.6	CEKAMTAK	RT: 53.88
iNS7-R3-1_SW_RC5_01_8031	Cytochrome c oxidase subunit OS=Sus scrofa OX=9823 GN=COX6B PE=3 SV=1	tr|A0A4X1TG97|A0A4X1TG97_PIG	19760		-2.3	GGDVSVCEWYRR	RT: 62.91
iNS7-R3-1_SW_RC5_01_8031	Cytochrome c oxidase subunit OS=Sus scrofa OX=9823 GN=COX6B PE=3 SV=1	tr|A0A4X1TG97|A0A4X1TG97_PIG	90877		3.7	GGDVSVCEWYRR	RT: 62.91
iNS7-R3-1_SW_RC5_01_8031	Cytochrome c oxidase subunit OS=Sus scrofa OX=9823 GN=COX6B PE=3 SV=1	tr|A0A4X1TG97|A0A4X1TG97_PIG	32604		-1.7	SLCPISWVSAWDDR	RT: 130.8
iNS7-R3-1_SW_RC5_01_8031	Cytochrome c oxidase subunit OS=Sus scrofa OX=9823 GN=COX6B PE=3 SV=1	tr|A0A4X1TG97|A0A4X1TG97_PIG	42066		-3.9	SLCPISWVSAWDDRR	RT: 110.54
iNS7-R3-1_SW_RC5_01_8031	Cytochrome c oxidase subunit OS=Sus scrofa OX=9823 GN=COX6B PE=3 SV=1	tr|A0A4X1TG97|A0A4X1TG97_PIG	32110		-4.4	AEGTFPGK	RT: 45.9
iNS7-R3-1_SW_RC5_01_8031	Cytochrome c oxidase subunit OS=Sus scrofa OX=9823 GN=COX6B PE=3 SV=1	tr|A0A4X1TG97|A0A4X1TG97_PIG	52117		-0.2	AEGTFPGKI	RT: 58.05
PEF-R1-1_SW_RA7_01_8012	Cytochrome c oxidase subunit OS=Sus scrofa OX=9823 GN=COX6B PE=3 SV=1	tr|A0A4X1TG97|A0A4X1TG97_PIG	30761		-1.1	MAEDIQTK	RT: 178.38
PEF-R1-1_SW_RA7_01_8012	Cytochrome c oxidase subunit OS=Sus scrofa OX=9823 GN=COX6B PE=3 SV=1	tr|A0A4X1TG97|A0A4X1TG97_PIG	45581		-1.7	MAEDIQTKIK	RT: 85.94
PEF-R1-1_SW_RA7_01_8012	Cytochrome c oxidase subunit OS=Sus scrofa OX=9823 GN=COX6B PE=3 SV=1	tr|A0A4X1TG97|A0A4X1TG97_PIG	130378		-4.7	FPNQNQTR	RT: 54.03
PEF-R1-1_SW_RA7_01_8012	Cytochrome c oxidase subunit OS=Sus scrofa OX=9823 GN=COX6B PE=3 SV=1	tr|A0A4X1TG97|A0A4X1TG97_PIG	289332		-1.5	NCWQNYLDFHR	RT: 86.64
PEF-R1-1_SW_RA7_01_8012	Cytochrome c oxidase subunit OS=Sus scrofa OX=9823 GN=COX6B PE=3 SV=1	tr|A0A4X1TG97|A0A4X1TG97_PIG	311030		-1.8	NCWQNYLDFHR	RT: 86.64
PEF-R1-1_SW_RA7_01_8012	Cytochrome c oxidase subunit OS=Sus scrofa OX=9823 GN=COX6B PE=3 SV=1	tr|A0A4X1TG97|A0A4X1TG97_PIG	29241		-2.1	NCWQNYLDFHRCEK	RT: 73.22
PEF-R1-1_SW_RA7_01_8012	Cytochrome c oxidase subunit OS=Sus scrofa OX=9823 GN=COX6B PE=3 SV=1	tr|A0A4X1TG97|A0A4X1TG97_PIG	56392		8.3	CEKAMTAK	RT: 62.58
PEF-R1-1_SW_RA7_01_8012	Cytochrome c oxidase subunit OS=Sus scrofa OX=9823 GN=COX6B PE=3 SV=1	tr|A0A4X1TG97|A0A4X1TG97_PIG	79496		-7	GGDVSVCEWYRR	RT: 67.18
PEF-R1-1_SW_RA7_01_8012	Cytochrome c oxidase subunit OS=Sus scrofa OX=9823 GN=COX6B PE=3 SV=1	tr|A0A4X1TG97|A0A4X1TG97_PIG	143089		-2.1	GGDVSVCEWYRR	RT: 67.18
PEF-R1-1_SW_RA7_01_8012	Cytochrome c oxidase subunit OS=Sus scrofa OX=9823 GN=COX6B PE=3 SV=1	tr|A0A4X1TG97|A0A4X1TG97_PIG	91979		-3.5	SLCPISWVSAWDDR	RT: 128.5
PEF-R1-1_SW_RA7_01_8012	Cytochrome c oxidase subunit OS=Sus scrofa OX=9823 GN=COX6B PE=3 SV=1	tr|A0A4X1TG97|A0A4X1TG97_PIG	1159323		-2.3	SLCPISWVSAWDDRR	RT: 107.21
PEF-R1-1_SW_RA7_01_8012	Cytochrome c oxidase subunit OS=Sus scrofa OX=9823 GN=COX6B PE=3 SV=1	tr|A0A4X1TG97|A0A4X1TG97_PIG	120821		-7	AEGTFPGK	RT: 44.56
PEF-R1-1_SW_RA7_01_8012	Cytochrome c oxidase subunit OS=Sus scrofa OX=9823 GN=COX6B PE=3 SV=1	tr|A0A4X1TG97|A0A4X1TG97_PIG	67298		0.6	AEGTFPGKI	RT: 56.88
PEF-R2-1_SW_RB4_01_8018	Cytochrome c oxidase subunit OS=Sus scrofa OX=9823 GN=COX6B PE=3 SV=1	tr|A0A4X1TG97|A0A4X1TG97_PIG	3458		0.5	MAEDIQTK	RT: 172.64
PEF-R2-1_SW_RB4_01_8018	Cytochrome c oxidase subunit OS=Sus scrofa OX=9823 GN=COX6B PE=3 SV=1	tr|A0A4X1TG97|A0A4X1TG97_PIG	12141		0.4	MAEDIQTKIK	RT: 83.83
PEF-R2-1_SW_RB4_01_8018	Cytochrome c oxidase subunit OS=Sus scrofa OX=9823 GN=COX6B PE=3 SV=1	tr|A0A4X1TG97|A0A4X1TG97_PIG	57285		-2.1	FPNQNQTR	RT: 54.83
PEF-R2-1_SW_RB4_01_8018	Cytochrome c oxidase subunit OS=Sus scrofa OX=9823 GN=COX6B PE=3 SV=1	tr|A0A4X1TG97|A0A4X1TG97_PIG	72010		-1.9	NCWQNYLDFHR	RT: 86.62
PEF-R2-1_SW_RB4_01_8018	Cytochrome c oxidase subunit OS=Sus scrofa OX=9823 GN=COX6B PE=3 SV=1	tr|A0A4X1TG97|A0A4X1TG97_PIG	73663		-1.8	NCWQNYLDFHR	RT: 86.62
PEF-R2-1_SW_RB4_01_8018	Cytochrome c oxidase subunit OS=Sus scrofa OX=9823 GN=COX6B PE=3 SV=1	tr|A0A4X1TG97|A0A4X1TG97_PIG	5985		5	NCWQNYLDFHRCEK	RT: 70.54
PEF-R2-1_SW_RB4_01_8018	Cytochrome c oxidase subunit OS=Sus scrofa OX=9823 GN=COX6B PE=3 SV=1	tr|A0A4X1TG97|A0A4X1TG97_PIG	15770		5.6	CEKAMTAK	RT: 54.94
PEF-R2-1_SW_RB4_01_8018	Cytochrome c oxidase subunit OS=Sus scrofa OX=9823 GN=COX6B PE=3 SV=1	tr|A0A4X1TG97|A0A4X1TG97_PIG	53903		-6.5	GGDVSVCEWYRR	RT: 64.42
PEF-R2-1_SW_RB4_01_8018	Cytochrome c oxidase subunit OS=Sus scrofa OX=9823 GN=COX6B PE=3 SV=1	tr|A0A4X1TG97|A0A4X1TG97_PIG	59945		-6.3	GGDVSVCEWYRR	RT: 64.42
PEF-R2-1_SW_RB4_01_8018	Cytochrome c oxidase subunit OS=Sus scrofa OX=9823 GN=COX6B PE=3 SV=1	tr|A0A4X1TG97|A0A4X1TG97_PIG	13737		-5.6	SLCPISWVSAWDDR	RT: 127.3
PEF-R2-1_SW_RB4_01_8018	Cytochrome c oxidase subunit OS=Sus scrofa OX=9823 GN=COX6B PE=3 SV=1	tr|A0A4X1TG97|A0A4X1TG97_PIG	17290		-2.1	SLCPISWVSAWDDRR	RT: 110.68
PEF-R2-1_SW_RB4_01_8018	Cytochrome c oxidase subunit OS=Sus scrofa OX=9823 GN=COX6B PE=3 SV=1	tr|A0A4X1TG97|A0A4X1TG97_PIG	19627		-1.1	AEGTFPGK	RT: 45.77
PEF-R2-1_SW_RB4_01_8018	Cytochrome c oxidase subunit OS=Sus scrofa OX=9823 GN=COX6B PE=3 SV=1	tr|A0A4X1TG97|A0A4X1TG97_PIG	12882		2.2	AEGTFPGKI	RT: 57.53
PEF-R3-1_SW_RC1_01_8030	Cytochrome c oxidase subunit OS=Sus scrofa OX=9823 GN=COX6B PE=3 SV=1	tr|A0A4X1TG97|A0A4X1TG97_PIG	7885		-4	MAEDIQTK	RT: 176.29
PEF-R3-1_SW_RC1_01_8030	Cytochrome c oxidase subunit OS=Sus scrofa OX=9823 GN=COX6B PE=3 SV=1	tr|A0A4X1TG97|A0A4X1TG97_PIG	34523		-7.3	MAEDIQTKIK	RT: 85.24
PEF-R3-1_SW_RC1_01_8030	Cytochrome c oxidase subunit OS=Sus scrofa OX=9823 GN=COX6B PE=3 SV=1	tr|A0A4X1TG97|A0A4X1TG97_PIG	147535		-3.2	FPNQNQTR	RT: 52.5
PEF-R3-1_SW_RC1_01_8030	Cytochrome c oxidase subunit OS=Sus scrofa OX=9823 GN=COX6B PE=3 SV=1	tr|A0A4X1TG97|A0A4X1TG97_PIG	98743		-4.3	NCWQNYLDFHR	RT: 87.41
PEF-R3-1_SW_RC1_01_8030	Cytochrome c oxidase subunit OS=Sus scrofa OX=9823 GN=COX6B PE=3 SV=1	tr|A0A4X1TG97|A0A4X1TG97_PIG	111150		-3.7	NCWQNYLDFHR	RT: 87.41
PEF-R3-1_SW_RC1_01_8030	Cytochrome c oxidase subunit OS=Sus scrofa OX=9823 GN=COX6B PE=3 SV=1	tr|A0A4X1TG97|A0A4X1TG97_PIG	21983		-1.4	NCWQNYLDFHRCEK	RT: 72.67
PEF-R3-1_SW_RC1_01_8030	Cytochrome c oxidase subunit OS=Sus scrofa OX=9823 GN=COX6B PE=3 SV=1	tr|A0A4X1TG97|A0A4X1TG97_PIG	55024		-5	CEKAMTAK	RT: 56.68
PEF-R3-1_SW_RC1_01_8030	Cytochrome c oxidase subunit OS=Sus scrofa OX=9823 GN=COX6B PE=3 SV=1	tr|A0A4X1TG97|A0A4X1TG97_PIG	42161		-5.7	GGDVSVCEWYRR	RT: 64.68
PEF-R3-1_SW_RC1_01_8030	Cytochrome c oxidase subunit OS=Sus scrofa OX=9823 GN=COX6B PE=3 SV=1	tr|A0A4X1TG97|A0A4X1TG97_PIG	52858		-3	GGDVSVCEWYRR	RT: 64.68
PEF-R3-1_SW_RC1_01_8030	Cytochrome c oxidase subunit OS=Sus scrofa OX=9823 GN=COX6B PE=3 SV=1	tr|A0A4X1TG97|A0A4X1TG97_PIG	74594		-5.6	SLCPISWVSAWDDR	RT: 126.11
PEF-R3-1_SW_RC1_01_8030	Cytochrome c oxidase subunit OS=Sus scrofa OX=9823 GN=COX6B PE=3 SV=1	tr|A0A4X1TG97|A0A4X1TG97_PIG	162982		-5.9	SLCPISWVSAWDDRR	RT: 107.98
PEF-R3-1_SW_RC1_01_8030	Cytochrome c oxidase subunit OS=Sus scrofa OX=9823 GN=COX6B PE=3 SV=1	tr|A0A4X1TG97|A0A4X1TG97_PIG	66956		0.2	AEGTFPGK	RT: 44.58
PEF-R3-1_SW_RC1_01_8030	Cytochrome c oxidase subunit OS=Sus scrofa OX=9823 GN=COX6B PE=3 SV=1	tr|A0A4X1TG97|A0A4X1TG97_PIG	45410		-4.8	AEGTFPGKI	RT: 54.52

## Sheet: A0A4X1WAF4
Replicate	Protein Description	Protein Name	Total Area		Average Mass Error PPM	Peptide Sequence	Peptide Result
iNS15-R1-1_SW_RB1_01_8014	Cytochrome b-c1 complex subunit 6, mitochondrial OS=Sus scrofa OX=9823 GN=LOC100524873 PE=3 SV=1	tr|A0A4X1WAF4|A0A4X1WAF4_PIG	107331		-2.2	ERLELCDQR	RT: 38.23
iNS15-R1-1_SW_RB1_01_8014	Cytochrome b-c1 complex subunit 6, mitochondrial OS=Sus scrofa OX=9823 GN=LOC100524873 PE=3 SV=1	tr|A0A4X1WAF4|A0A4X1WAF4_PIG	127471		-2.8	ERLELCDQR	RT: 38.23
iNS15-R1-1_SW_RB1_01_8014	Cytochrome b-c1 complex subunit 6, mitochondrial OS=Sus scrofa OX=9823 GN=LOC100524873 PE=3 SV=1	tr|A0A4X1WAF4|A0A4X1WAF4_PIG	137446		-2	LELCDQR	RT: 39.56
iNS15-R1-1_SW_RB1_01_8014	Cytochrome b-c1 complex subunit 6, mitochondrial OS=Sus scrofa OX=9823 GN=LOC100524873 PE=3 SV=1	tr|A0A4X1WAF4|A0A4X1WAF4_PIG	150784		-7.9	LELCDQRVSSR	RT: 78.5
iNS15-R1-1_SW_RB1_01_8014	Cytochrome b-c1 complex subunit 6, mitochondrial OS=Sus scrofa OX=9823 GN=LOC100524873 PE=3 SV=1	tr|A0A4X1WAF4|A0A4X1WAF4_PIG	127832		-1.3	VSSRSQTEEDCTEELFDFLHAR	RT: 104.5
iNS15-R1-1_SW_RB1_01_8014	Cytochrome b-c1 complex subunit 6, mitochondrial OS=Sus scrofa OX=9823 GN=LOC100524873 PE=3 SV=1	tr|A0A4X1WAF4|A0A4X1WAF4_PIG	56981		-0.7	SQTEEDCTEELFDFLHAR	RT: 117.93
iNS15-R2-1_SW_RB6_01_8020	Cytochrome b-c1 complex subunit 6, mitochondrial OS=Sus scrofa OX=9823 GN=LOC100524873 PE=3 SV=1	tr|A0A4X1WAF4|A0A4X1WAF4_PIG	45068		-0.6	ERLELCDQR	RT: 37.27
iNS15-R2-1_SW_RB6_01_8020	Cytochrome b-c1 complex subunit 6, mitochondrial OS=Sus scrofa OX=9823 GN=LOC100524873 PE=3 SV=1	tr|A0A4X1WAF4|A0A4X1WAF4_PIG	45486		-0.6	ERLELCDQR	RT: 37.27
iNS15-R2-1_SW_RB6_01_8020	Cytochrome b-c1 complex subunit 6, mitochondrial OS=Sus scrofa OX=9823 GN=LOC100524873 PE=3 SV=1	tr|A0A4X1WAF4|A0A4X1WAF4_PIG	45467		-1.4	LELCDQR	RT: 39.43
iNS15-R2-1_SW_RB6_01_8020	Cytochrome b-c1 complex subunit 6, mitochondrial OS=Sus scrofa OX=9823 GN=LOC100524873 PE=3 SV=1	tr|A0A4X1WAF4|A0A4X1WAF4_PIG	48336		-0.8	LELCDQRVSSR	RT: 79.51
iNS15-R2-1_SW_RB6_01_8020	Cytochrome b-c1 complex subunit 6, mitochondrial OS=Sus scrofa OX=9823 GN=LOC100524873 PE=3 SV=1	tr|A0A4X1WAF4|A0A4X1WAF4_PIG	116812		-3.1	VSSRSQTEEDCTEELFDFLHAR	RT: 99.42
iNS15-R2-1_SW_RB6_01_8020	Cytochrome b-c1 complex subunit 6, mitochondrial OS=Sus scrofa OX=9823 GN=LOC100524873 PE=3 SV=1	tr|A0A4X1WAF4|A0A4X1WAF4_PIG	3097		-6.9	SQTEEDCTEELFDFLHAR	RT: 118.32
iNS15-R3-1_SW_RC3_01_8032	Cytochrome b-c1 complex subunit 6, mitochondrial OS=Sus scrofa OX=9823 GN=LOC100524873 PE=3 SV=1	tr|A0A4X1WAF4|A0A4X1WAF4_PIG	412889		-3.1	ERLELCDQR	RT: 39.25
iNS15-R3-1_SW_RC3_01_8032	Cytochrome b-c1 complex subunit 6, mitochondrial OS=Sus scrofa OX=9823 GN=LOC100524873 PE=3 SV=1	tr|A0A4X1WAF4|A0A4X1WAF4_PIG	441047		-3.3	ERLELCDQR	RT: 39.25
iNS15-R3-1_SW_RC3_01_8032	Cytochrome b-c1 complex subunit 6, mitochondrial OS=Sus scrofa OX=9823 GN=LOC100524873 PE=3 SV=1	tr|A0A4X1WAF4|A0A4X1WAF4_PIG	513057		-0.6	LELCDQR	RT: 41.41
iNS15-R3-1_SW_RC3_01_8032	Cytochrome b-c1 complex subunit 6, mitochondrial OS=Sus scrofa OX=9823 GN=LOC100524873 PE=3 SV=1	tr|A0A4X1WAF4|A0A4X1WAF4_PIG	573553		1	LELCDQRVSSR	RT: 77.55
iNS15-R3-1_SW_RC3_01_8032	Cytochrome b-c1 complex subunit 6, mitochondrial OS=Sus scrofa OX=9823 GN=LOC100524873 PE=3 SV=1	tr|A0A4X1WAF4|A0A4X1WAF4_PIG	71991		-0.4	VSSRSQTEEDCTEELFDFLHAR	RT: 100.27
iNS15-R3-1_SW_RC3_01_8032	Cytochrome b-c1 complex subunit 6, mitochondrial OS=Sus scrofa OX=9823 GN=LOC100524873 PE=3 SV=1	tr|A0A4X1WAF4|A0A4X1WAF4_PIG	84208		-3.7	SQTEEDCTEELFDFLHAR	RT: 121.37
iNS7-R1-1_SW_RA8_01_8013	Cytochrome b-c1 complex subunit 6, mitochondrial OS=Sus scrofa OX=9823 GN=LOC100524873 PE=3 SV=1	tr|A0A4X1WAF4|A0A4X1WAF4_PIG	414694		-6.8	ERLELCDQR	RT: 36.77
iNS7-R1-1_SW_RA8_01_8013	Cytochrome b-c1 complex subunit 6, mitochondrial OS=Sus scrofa OX=9823 GN=LOC100524873 PE=3 SV=1	tr|A0A4X1WAF4|A0A4X1WAF4_PIG	414694		-6.8	ERLELCDQR	RT: 36.77
iNS7-R1-1_SW_RA8_01_8013	Cytochrome b-c1 complex subunit 6, mitochondrial OS=Sus scrofa OX=9823 GN=LOC100524873 PE=3 SV=1	tr|A0A4X1WAF4|A0A4X1WAF4_PIG	380532		-3.3	LELCDQR	RT: 39.62
iNS7-R1-1_SW_RA8_01_8013	Cytochrome b-c1 complex subunit 6, mitochondrial OS=Sus scrofa OX=9823 GN=LOC100524873 PE=3 SV=1	tr|A0A4X1WAF4|A0A4X1WAF4_PIG	733172		-5.3	LELCDQRVSSR	RT: 78.35
iNS7-R1-1_SW_RA8_01_8013	Cytochrome b-c1 complex subunit 6, mitochondrial OS=Sus scrofa OX=9823 GN=LOC100524873 PE=3 SV=1	tr|A0A4X1WAF4|A0A4X1WAF4_PIG	468179		-5.4	VSSRSQTEEDCTEELFDFLHAR	RT: 100.94
iNS7-R1-1_SW_RA8_01_8013	Cytochrome b-c1 complex subunit 6, mitochondrial OS=Sus scrofa OX=9823 GN=LOC100524873 PE=3 SV=1	tr|A0A4X1WAF4|A0A4X1WAF4_PIG	158517		-5	SQTEEDCTEELFDFLHAR	RT: 122.71
iNS7-R2-1_SW_RB5_01_8019	Cytochrome b-c1 complex subunit 6, mitochondrial OS=Sus scrofa OX=9823 GN=LOC100524873 PE=3 SV=1	tr|A0A4X1WAF4|A0A4X1WAF4_PIG	42028		-2.8	ERLELCDQR	RT: 37
iNS7-R2-1_SW_RB5_01_8019	Cytochrome b-c1 complex subunit 6, mitochondrial OS=Sus scrofa OX=9823 GN=LOC100524873 PE=3 SV=1	tr|A0A4X1WAF4|A0A4X1WAF4_PIG	44802		-2.5	ERLELCDQR	RT: 37
iNS7-R2-1_SW_RB5_01_8019	Cytochrome b-c1 complex subunit 6, mitochondrial OS=Sus scrofa OX=9823 GN=LOC100524873 PE=3 SV=1	tr|A0A4X1WAF4|A0A4X1WAF4_PIG	54530		0.8	LELCDQR	RT: 36.51
iNS7-R2-1_SW_RB5_01_8019	Cytochrome b-c1 complex subunit 6, mitochondrial OS=Sus scrofa OX=9823 GN=LOC100524873 PE=3 SV=1	tr|A0A4X1WAF4|A0A4X1WAF4_PIG	1349		-2.5	LELCDQRVSSR	RT: 78.26
iNS7-R2-1_SW_RB5_01_8019	Cytochrome b-c1 complex subunit 6, mitochondrial OS=Sus scrofa OX=9823 GN=LOC100524873 PE=3 SV=1	tr|A0A4X1WAF4|A0A4X1WAF4_PIG	15029		1.4	VSSRSQTEEDCTEELFDFLHAR	RT: 97.19
iNS7-R2-1_SW_RB5_01_8019	Cytochrome b-c1 complex subunit 6, mitochondrial OS=Sus scrofa OX=9823 GN=LOC100524873 PE=3 SV=1	tr|A0A4X1WAF4|A0A4X1WAF4_PIG	1292		7	SQTEEDCTEELFDFLHAR	RT: 114.78
iNS7-R3-1_SW_RC5_01_8031	Cytochrome b-c1 complex subunit 6, mitochondrial OS=Sus scrofa OX=9823 GN=LOC100524873 PE=3 SV=1	tr|A0A4X1WAF4|A0A4X1WAF4_PIG	36651		-3.4	ERLELCDQR	RT: 36.17
iNS7-R3-1_SW_RC5_01_8031	Cytochrome b-c1 complex subunit 6, mitochondrial OS=Sus scrofa OX=9823 GN=LOC100524873 PE=3 SV=1	tr|A0A4X1WAF4|A0A4X1WAF4_PIG	35777		-3.4	ERLELCDQR	RT: 36.17
iNS7-R3-1_SW_RC5_01_8031	Cytochrome b-c1 complex subunit 6, mitochondrial OS=Sus scrofa OX=9823 GN=LOC100524873 PE=3 SV=1	tr|A0A4X1WAF4|A0A4X1WAF4_PIG	78774		-0.7	LELCDQR	RT: 40.53
iNS7-R3-1_SW_RC5_01_8031	Cytochrome b-c1 complex subunit 6, mitochondrial OS=Sus scrofa OX=9823 GN=LOC100524873 PE=3 SV=1	tr|A0A4X1WAF4|A0A4X1WAF4_PIG	59147		-6	LELCDQRVSSR	RT: 78.43
iNS7-R3-1_SW_RC5_01_8031	Cytochrome b-c1 complex subunit 6, mitochondrial OS=Sus scrofa OX=9823 GN=LOC100524873 PE=3 SV=1	tr|A0A4X1WAF4|A0A4X1WAF4_PIG	57323		-0.9	VSSRSQTEEDCTEELFDFLHAR	RT: 101.86
iNS7-R3-1_SW_RC5_01_8031	Cytochrome b-c1 complex subunit 6, mitochondrial OS=Sus scrofa OX=9823 GN=LOC100524873 PE=3 SV=1	tr|A0A4X1WAF4|A0A4X1WAF4_PIG	38076		-0.3	SQTEEDCTEELFDFLHAR	RT: 115.14
PEF-R1-1_SW_RA7_01_8012	Cytochrome b-c1 complex subunit 6, mitochondrial OS=Sus scrofa OX=9823 GN=LOC100524873 PE=3 SV=1	tr|A0A4X1WAF4|A0A4X1WAF4_PIG	127262		-4.8	ERLELCDQR	RT: 37.34
PEF-R1-1_SW_RA7_01_8012	Cytochrome b-c1 complex subunit 6, mitochondrial OS=Sus scrofa OX=9823 GN=LOC100524873 PE=3 SV=1	tr|A0A4X1WAF4|A0A4X1WAF4_PIG	127585		-4.7	ERLELCDQR	RT: 37.34
PEF-R1-1_SW_RA7_01_8012	Cytochrome b-c1 complex subunit 6, mitochondrial OS=Sus scrofa OX=9823 GN=LOC100524873 PE=3 SV=1	tr|A0A4X1WAF4|A0A4X1WAF4_PIG	43507		-6.1	LELCDQR	RT: 38.72
PEF-R1-1_SW_RA7_01_8012	Cytochrome b-c1 complex subunit 6, mitochondrial OS=Sus scrofa OX=9823 GN=LOC100524873 PE=3 SV=1	tr|A0A4X1WAF4|A0A4X1WAF4_PIG	57241		-6.8	LELCDQRVSSR	RT: 77.94
PEF-R1-1_SW_RA7_01_8012	Cytochrome b-c1 complex subunit 6, mitochondrial OS=Sus scrofa OX=9823 GN=LOC100524873 PE=3 SV=1	tr|A0A4X1WAF4|A0A4X1WAF4_PIG	93154		-5.6	VSSRSQTEEDCTEELFDFLHAR	RT: 102.28
PEF-R1-1_SW_RA7_01_8012	Cytochrome b-c1 complex subunit 6, mitochondrial OS=Sus scrofa OX=9823 GN=LOC100524873 PE=3 SV=1	tr|A0A4X1WAF4|A0A4X1WAF4_PIG	36439		-4.8	SQTEEDCTEELFDFLHAR	RT: 120.43
PEF-R2-1_SW_RB4_01_8018	Cytochrome b-c1 complex subunit 6, mitochondrial OS=Sus scrofa OX=9823 GN=LOC100524873 PE=3 SV=1	tr|A0A4X1WAF4|A0A4X1WAF4_PIG	112081		-7	ERLELCDQR	RT: 35.53
PEF-R2-1_SW_RB4_01_8018	Cytochrome b-c1 complex subunit 6, mitochondrial OS=Sus scrofa OX=9823 GN=LOC100524873 PE=3 SV=1	tr|A0A4X1WAF4|A0A4X1WAF4_PIG	112081		-7	ERLELCDQR	RT: 35.53
PEF-R2-1_SW_RB4_01_8018	Cytochrome b-c1 complex subunit 6, mitochondrial OS=Sus scrofa OX=9823 GN=LOC100524873 PE=3 SV=1	tr|A0A4X1WAF4|A0A4X1WAF4_PIG	31711		-3.5	LELCDQR	RT: 37.14
PEF-R2-1_SW_RB4_01_8018	Cytochrome b-c1 complex subunit 6, mitochondrial OS=Sus scrofa OX=9823 GN=LOC100524873 PE=3 SV=1	tr|A0A4X1WAF4|A0A4X1WAF4_PIG	89015		-0.9	LELCDQRVSSR	RT: 75.54
PEF-R2-1_SW_RB4_01_8018	Cytochrome b-c1 complex subunit 6, mitochondrial OS=Sus scrofa OX=9823 GN=LOC100524873 PE=3 SV=1	tr|A0A4X1WAF4|A0A4X1WAF4_PIG	52782		-4.6	VSSRSQTEEDCTEELFDFLHAR	RT: 97.18
PEF-R2-1_SW_RB4_01_8018	Cytochrome b-c1 complex subunit 6, mitochondrial OS=Sus scrofa OX=9823 GN=LOC100524873 PE=3 SV=1	tr|A0A4X1WAF4|A0A4X1WAF4_PIG	1691		2.4	SQTEEDCTEELFDFLHAR	RT: 117.44
PEF-R3-1_SW_RC1_01_8030	Cytochrome b-c1 complex subunit 6, mitochondrial OS=Sus scrofa OX=9823 GN=LOC100524873 PE=3 SV=1	tr|A0A4X1WAF4|A0A4X1WAF4_PIG	147212		-7.1	ERLELCDQR	RT: 33.85
PEF-R3-1_SW_RC1_01_8030	Cytochrome b-c1 complex subunit 6, mitochondrial OS=Sus scrofa OX=9823 GN=LOC100524873 PE=3 SV=1	tr|A0A4X1WAF4|A0A4X1WAF4_PIG	145996		-7.2	ERLELCDQR	RT: 33.85
PEF-R3-1_SW_RC1_01_8030	Cytochrome b-c1 complex subunit 6, mitochondrial OS=Sus scrofa OX=9823 GN=LOC100524873 PE=3 SV=1	tr|A0A4X1WAF4|A0A4X1WAF4_PIG	89851		2.2	LELCDQR	RT: 40.95
PEF-R3-1_SW_RC1_01_8030	Cytochrome b-c1 complex subunit 6, mitochondrial OS=Sus scrofa OX=9823 GN=LOC100524873 PE=3 SV=1	tr|A0A4X1WAF4|A0A4X1WAF4_PIG	50141		-6.5	LELCDQRVSSR	RT: 78.57
PEF-R3-1_SW_RC1_01_8030	Cytochrome b-c1 complex subunit 6, mitochondrial OS=Sus scrofa OX=9823 GN=LOC100524873 PE=3 SV=1	tr|A0A4X1WAF4|A0A4X1WAF4_PIG	91314		-1.3	VSSRSQTEEDCTEELFDFLHAR	RT: 100.19
PEF-R3-1_SW_RC1_01_8030	Cytochrome b-c1 complex subunit 6, mitochondrial OS=Sus scrofa OX=9823 GN=LOC100524873 PE=3 SV=1	tr|A0A4X1WAF4|A0A4X1WAF4_PIG	41762		-3.7	SQTEEDCTEELFDFLHAR	RT: 119.25

## Sheet: A0A5G2QP21
Replicate	Protein Description	Protein Name	Total Area		Average Mass Error PPM	Peptide Sequence	Peptide Result
iNS15-R1-1_SW_RB1_01_8014	Malate dehydrogenase 1 OS=Sus scrofa OX=9823 GN=MDH1 PE=1 SV=1	tr|A0A5G2QP21|A0A5G2QP21_PIG	72694		1.6	MVIVVGNPANTNCLTASKSAPSIPK	RT: 126.58
iNS15-R1-1_SW_RB1_01_8014	Malate dehydrogenase 1 OS=Sus scrofa OX=9823 GN=MDH1 PE=1 SV=1	tr|A0A5G2QP21|A0A5G2QP21_PIG	68267		4.2	SAPSIPKENFSCLTR	RT: 68.26
iNS15-R1-1_SW_RB1_01_8014	Malate dehydrogenase 1 OS=Sus scrofa OX=9823 GN=MDH1 PE=1 SV=1	tr|A0A5G2QP21|A0A5G2QP21_PIG	1660182		-7.3	SAPSIPKENFSCLTR	RT: 68.26
iNS15-R1-1_SW_RB1_01_8014	Malate dehydrogenase 1 OS=Sus scrofa OX=9823 GN=MDH1 PE=1 SV=1	tr|A0A5G2QP21|A0A5G2QP21_PIG	514919		-1.1	ENFSCLTR	RT: 51.58
iNS15-R1-1_SW_RB1_01_8014	Malate dehydrogenase 1 OS=Sus scrofa OX=9823 GN=MDH1 PE=1 SV=1	tr|A0A5G2QP21|A0A5G2QP21_PIG	347320		-4.7	ENFSCLTRLDHNR	RT: 38.57
iNS15-R1-1_SW_RB1_01_8014	Malate dehydrogenase 1 OS=Sus scrofa OX=9823 GN=MDH1 PE=1 SV=1	tr|A0A5G2QP21|A0A5G2QP21_PIG	17936		-4.9	LDHNRAK	RT: 45.52
iNS15-R1-1_SW_RB1_01_8014	Malate dehydrogenase 1 OS=Sus scrofa OX=9823 GN=MDH1 PE=1 SV=1	tr|A0A5G2QP21|A0A5G2QP21_PIG	77235		-3.9	LGVTSDDVK	RT: 37.52
iNS15-R1-1_SW_RB1_01_8014	Malate dehydrogenase 1 OS=Sus scrofa OX=9823 GN=MDH1 PE=1 SV=1	tr|A0A5G2QP21|A0A5G2QP21_PIG	686071		-4.9	GEFITTVQQR	RT: 60.06
iNS15-R1-1_SW_RB1_01_8014	Malate dehydrogenase 1 OS=Sus scrofa OX=9823 GN=MDH1 PE=1 SV=1	tr|A0A5G2QP21|A0A5G2QP21_PIG	64049		2.5	GEFITTVQQRGAAVIK	RT: 68.96
iNS15-R1-1_SW_RB1_01_8014	Malate dehydrogenase 1 OS=Sus scrofa OX=9823 GN=MDH1 PE=1 SV=1	tr|A0A5G2QP21|A0A5G2QP21_PIG	18278		-2.5	KLSSAMSAAK	RT: 29.59
iNS15-R1-1_SW_RB1_01_8014	Malate dehydrogenase 1 OS=Sus scrofa OX=9823 GN=MDH1 PE=1 SV=1	tr|A0A5G2QP21|A0A5G2QP21_PIG	73929		-5.1	KLSSAMSAAK	RT: 37.17
iNS15-R1-1_SW_RB1_01_8014	Malate dehydrogenase 1 OS=Sus scrofa OX=9823 GN=MDH1 PE=1 SV=1	tr|A0A5G2QP21|A0A5G2QP21_PIG	541310		-5.5	LSSAMSAAK	RT: 71.53
iNS15-R1-1_SW_RB1_01_8014	Malate dehydrogenase 1 OS=Sus scrofa OX=9823 GN=MDH1 PE=1 SV=1	tr|A0A5G2QP21|A0A5G2QP21_PIG	85671		-3.2	LSSAMSAAKAICDHVR	RT: 148.05
iNS15-R1-1_SW_RB1_01_8014	Malate dehydrogenase 1 OS=Sus scrofa OX=9823 GN=MDH1 PE=1 SV=1	tr|A0A5G2QP21|A0A5G2QP21_PIG	301492		-4	AICDHVR	RT: 37.95
iNS15-R1-1_SW_RB1_01_8014	Malate dehydrogenase 1 OS=Sus scrofa OX=9823 GN=MDH1 PE=1 SV=1	tr|A0A5G2QP21|A0A5G2QP21_PIG	2381137		-8.8	IVEGLPINDFSR	RT: 84.8
iNS15-R1-1_SW_RB1_01_8014	Malate dehydrogenase 1 OS=Sus scrofa OX=9823 GN=MDH1 PE=1 SV=1	tr|A0A5G2QP21|A0A5G2QP21_PIG	2216407		-9.4	IVEGLPINDFSR	RT: 84.8
iNS15-R1-1_SW_RB1_01_8014	Malate dehydrogenase 1 OS=Sus scrofa OX=9823 GN=MDH1 PE=1 SV=1	tr|A0A5G2QP21|A0A5G2QP21_PIG	27056		1.8	IVEGLPINDFSREK	RT: 106.43
iNS15-R1-1_SW_RB1_01_8014	Malate dehydrogenase 1 OS=Sus scrofa OX=9823 GN=MDH1 PE=1 SV=1	tr|A0A5G2QP21|A0A5G2QP21_PIG	117040		0.2	EKMDLTAK	RT: 54.57
iNS15-R1-1_SW_RB1_01_8014	Malate dehydrogenase 1 OS=Sus scrofa OX=9823 GN=MDH1 PE=1 SV=1	tr|A0A5G2QP21|A0A5G2QP21_PIG	96311		-4.1	ELAEEKETAFEFLSSA	RT: 115.11
iNS15-R2-1_SW_RB6_01_8020	Malate dehydrogenase 1 OS=Sus scrofa OX=9823 GN=MDH1 PE=1 SV=1	tr|A0A5G2QP21|A0A5G2QP21_PIG	7201		0.3	MVIVVGNPANTNCLTASKSAPSIPK	RT: 130.6
iNS15-R2-1_SW_RB6_01_8020	Malate dehydrogenase 1 OS=Sus scrofa OX=9823 GN=MDH1 PE=1 SV=1	tr|A0A5G2QP21|A0A5G2QP21_PIG	60154		4.6	SAPSIPKENFSCLTR	RT: 55.91
iNS15-R2-1_SW_RB6_01_8020	Malate dehydrogenase 1 OS=Sus scrofa OX=9823 GN=MDH1 PE=1 SV=1	tr|A0A5G2QP21|A0A5G2QP21_PIG	538650		-2.1	SAPSIPKENFSCLTR	RT: 55.91
iNS15-R2-1_SW_RB6_01_8020	Malate dehydrogenase 1 OS=Sus scrofa OX=9823 GN=MDH1 PE=1 SV=1	tr|A0A5G2QP21|A0A5G2QP21_PIG	621167		-3.8	ENFSCLTR	RT: 52.94
iNS15-R2-1_SW_RB6_01_8020	Malate dehydrogenase 1 OS=Sus scrofa OX=9823 GN=MDH1 PE=1 SV=1	tr|A0A5G2QP21|A0A5G2QP21_PIG	383363		-6.3	ENFSCLTRLDHNR	RT: 38.72
iNS15-R2-1_SW_RB6_01_8020	Malate dehydrogenase 1 OS=Sus scrofa OX=9823 GN=MDH1 PE=1 SV=1	tr|A0A5G2QP21|A0A5G2QP21_PIG	29849		1.4	LDHNRAK	RT: 43.73
iNS15-R2-1_SW_RB6_01_8020	Malate dehydrogenase 1 OS=Sus scrofa OX=9823 GN=MDH1 PE=1 SV=1	tr|A0A5G2QP21|A0A5G2QP21_PIG	79705		-4.3	LGVTSDDVK	RT: 37.82
iNS15-R2-1_SW_RB6_01_8020	Malate dehydrogenase 1 OS=Sus scrofa OX=9823 GN=MDH1 PE=1 SV=1	tr|A0A5G2QP21|A0A5G2QP21_PIG	554458		-3.2	GEFITTVQQR	RT: 60.01
iNS15-R2-1_SW_RB6_01_8020	Malate dehydrogenase 1 OS=Sus scrofa OX=9823 GN=MDH1 PE=1 SV=1	tr|A0A5G2QP21|A0A5G2QP21_PIG	49381		-2.3	GEFITTVQQRGAAVIK	RT: 68.23
iNS15-R2-1_SW_RB6_01_8020	Malate dehydrogenase 1 OS=Sus scrofa OX=9823 GN=MDH1 PE=1 SV=1	tr|A0A5G2QP21|A0A5G2QP21_PIG	24985		-4.6	KLSSAMSAAK	RT: 27.74
iNS15-R2-1_SW_RB6_01_8020	Malate dehydrogenase 1 OS=Sus scrofa OX=9823 GN=MDH1 PE=1 SV=1	tr|A0A5G2QP21|A0A5G2QP21_PIG	45771		1.8	KLSSAMSAAK	RT: 39.63
iNS15-R2-1_SW_RB6_01_8020	Malate dehydrogenase 1 OS=Sus scrofa OX=9823 GN=MDH1 PE=1 SV=1	tr|A0A5G2QP21|A0A5G2QP21_PIG	136667		-6	LSSAMSAAK	RT: 72.95
iNS15-R2-1_SW_RB6_01_8020	Malate dehydrogenase 1 OS=Sus scrofa OX=9823 GN=MDH1 PE=1 SV=1	tr|A0A5G2QP21|A0A5G2QP21_PIG	4427		5.3	LSSAMSAAKAICDHVR	RT: 152.37
iNS15-R2-1_SW_RB6_01_8020	Malate dehydrogenase 1 OS=Sus scrofa OX=9823 GN=MDH1 PE=1 SV=1	tr|A0A5G2QP21|A0A5G2QP21_PIG	199690		-4.4	AICDHVR	RT: 36.22
iNS15-R2-1_SW_RB6_01_8020	Malate dehydrogenase 1 OS=Sus scrofa OX=9823 GN=MDH1 PE=1 SV=1	tr|A0A5G2QP21|A0A5G2QP21_PIG	479522		-3	IVEGLPINDFSR	RT: 52.23
iNS15-R2-1_SW_RB6_01_8020	Malate dehydrogenase 1 OS=Sus scrofa OX=9823 GN=MDH1 PE=1 SV=1	tr|A0A5G2QP21|A0A5G2QP21_PIG	1477755		-3	IVEGLPINDFSR	RT: 52.23
iNS15-R2-1_SW_RB6_01_8020	Malate dehydrogenase 1 OS=Sus scrofa OX=9823 GN=MDH1 PE=1 SV=1	tr|A0A5G2QP21|A0A5G2QP21_PIG	684		-1.5	IVEGLPINDFSREK	RT: 106.1
iNS15-R2-1_SW_RB6_01_8020	Malate dehydrogenase 1 OS=Sus scrofa OX=9823 GN=MDH1 PE=1 SV=1	tr|A0A5G2QP21|A0A5G2QP21_PIG	77672		-5.2	EKMDLTAK	RT: 52.84
iNS15-R2-1_SW_RB6_01_8020	Malate dehydrogenase 1 OS=Sus scrofa OX=9823 GN=MDH1 PE=1 SV=1	tr|A0A5G2QP21|A0A5G2QP21_PIG	6099		-3.4	ELAEEKETAFEFLSSA	RT: 112.47
iNS15-R3-1_SW_RC3_01_8032	Malate dehydrogenase 1 OS=Sus scrofa OX=9823 GN=MDH1 PE=1 SV=1	tr|A0A5G2QP21|A0A5G2QP21_PIG	23484		-1.9	MVIVVGNPANTNCLTASKSAPSIPK	RT: 125.08
iNS15-R3-1_SW_RC3_01_8032	Malate dehydrogenase 1 OS=Sus scrofa OX=9823 GN=MDH1 PE=1 SV=1	tr|A0A5G2QP21|A0A5G2QP21_PIG	110998		-4.7	SAPSIPKENFSCLTR	RT: 56.17
iNS15-R3-1_SW_RC3_01_8032	Malate dehydrogenase 1 OS=Sus scrofa OX=9823 GN=MDH1 PE=1 SV=1	tr|A0A5G2QP21|A0A5G2QP21_PIG	37145		-0.6	SAPSIPKENFSCLTR	RT: 56.17
iNS15-R3-1_SW_RC3_01_8032	Malate dehydrogenase 1 OS=Sus scrofa OX=9823 GN=MDH1 PE=1 SV=1	tr|A0A5G2QP21|A0A5G2QP21_PIG	87514		-2.9	ENFSCLTR	RT: 52.27
iNS15-R3-1_SW_RC3_01_8032	Malate dehydrogenase 1 OS=Sus scrofa OX=9823 GN=MDH1 PE=1 SV=1	tr|A0A5G2QP21|A0A5G2QP21_PIG	36651		-3.2	ENFSCLTRLDHNR	RT: 34.2
iNS15-R3-1_SW_RC3_01_8032	Malate dehydrogenase 1 OS=Sus scrofa OX=9823 GN=MDH1 PE=1 SV=1	tr|A0A5G2QP21|A0A5G2QP21_PIG	41876		-3.9	LDHNRAK	RT: 44.97
iNS15-R3-1_SW_RC3_01_8032	Malate dehydrogenase 1 OS=Sus scrofa OX=9823 GN=MDH1 PE=1 SV=1	tr|A0A5G2QP21|A0A5G2QP21_PIG	66785		-0.3	LGVTSDDVK	RT: 34.26
iNS15-R3-1_SW_RC3_01_8032	Malate dehydrogenase 1 OS=Sus scrofa OX=9823 GN=MDH1 PE=1 SV=1	tr|A0A5G2QP21|A0A5G2QP21_PIG	87438		4.7	GEFITTVQQR	RT: 59.72
iNS15-R3-1_SW_RC3_01_8032	Malate dehydrogenase 1 OS=Sus scrofa OX=9823 GN=MDH1 PE=1 SV=1	tr|A0A5G2QP21|A0A5G2QP21_PIG	33972		-3	GEFITTVQQRGAAVIK	RT: 67.23
iNS15-R3-1_SW_RC3_01_8032	Malate dehydrogenase 1 OS=Sus scrofa OX=9823 GN=MDH1 PE=1 SV=1	tr|A0A5G2QP21|A0A5G2QP21_PIG	13737		-1.2	KLSSAMSAAK	RT: 30.43
iNS15-R3-1_SW_RC3_01_8032	Malate dehydrogenase 1 OS=Sus scrofa OX=9823 GN=MDH1 PE=1 SV=1	tr|A0A5G2QP21|A0A5G2QP21_PIG	155781		-2.2	KLSSAMSAAK	RT: 40.38
iNS15-R3-1_SW_RC3_01_8032	Malate dehydrogenase 1 OS=Sus scrofa OX=9823 GN=MDH1 PE=1 SV=1	tr|A0A5G2QP21|A0A5G2QP21_PIG	46854		4.2	LSSAMSAAK	RT: 69.52
iNS15-R3-1_SW_RC3_01_8032	Malate dehydrogenase 1 OS=Sus scrofa OX=9823 GN=MDH1 PE=1 SV=1	tr|A0A5G2QP21|A0A5G2QP21_PIG	20881		-2.8	LSSAMSAAKAICDHVR	RT: 152.32
iNS15-R3-1_SW_RC3_01_8032	Malate dehydrogenase 1 OS=Sus scrofa OX=9823 GN=MDH1 PE=1 SV=1	tr|A0A5G2QP21|A0A5G2QP21_PIG	40736		-2.6	AICDHVR	RT: 38.87
iNS15-R3-1_SW_RC3_01_8032	Malate dehydrogenase 1 OS=Sus scrofa OX=9823 GN=MDH1 PE=1 SV=1	tr|A0A5G2QP21|A0A5G2QP21_PIG	93309		-5.4	IVEGLPINDFSR	RT: 85.09
iNS15-R3-1_SW_RC3_01_8032	Malate dehydrogenase 1 OS=Sus scrofa OX=9823 GN=MDH1 PE=1 SV=1	tr|A0A5G2QP21|A0A5G2QP21_PIG	1294720		-2.7	IVEGLPINDFSR	RT: 85.09
iNS15-R3-1_SW_RC3_01_8032	Malate dehydrogenase 1 OS=Sus scrofa OX=9823 GN=MDH1 PE=1 SV=1	tr|A0A5G2QP21|A0A5G2QP21_PIG	8645		1.3	IVEGLPINDFSREK	RT: 106.8
iNS15-R3-1_SW_RC3_01_8032	Malate dehydrogenase 1 OS=Sus scrofa OX=9823 GN=MDH1 PE=1 SV=1	tr|A0A5G2QP21|A0A5G2QP21_PIG	27208		-1.1	EKMDLTAK	RT: 53.47
iNS15-R3-1_SW_RC3_01_8032	Malate dehydrogenase 1 OS=Sus scrofa OX=9823 GN=MDH1 PE=1 SV=1	tr|A0A5G2QP21|A0A5G2QP21_PIG	32395		0	ELAEEKETAFEFLSSA	RT: 119.59
iNS7-R1-1_SW_RA8_01_8013	Malate dehydrogenase 1 OS=Sus scrofa OX=9823 GN=MDH1 PE=1 SV=1	tr|A0A5G2QP21|A0A5G2QP21_PIG	26543		2	MVIVVGNPANTNCLTASKSAPSIPK	RT: 126
iNS7-R1-1_SW_RA8_01_8013	Malate dehydrogenase 1 OS=Sus scrofa OX=9823 GN=MDH1 PE=1 SV=1	tr|A0A5G2QP21|A0A5G2QP21_PIG	28911		4.4	SAPSIPKENFSCLTR	RT: 70.43
iNS7-R1-1_SW_RA8_01_8013	Malate dehydrogenase 1 OS=Sus scrofa OX=9823 GN=MDH1 PE=1 SV=1	tr|A0A5G2QP21|A0A5G2QP21_PIG	347567		-5.5	SAPSIPKENFSCLTR	RT: 70.43
iNS7-R1-1_SW_RA8_01_8013	Malate dehydrogenase 1 OS=Sus scrofa OX=9823 GN=MDH1 PE=1 SV=1	tr|A0A5G2QP21|A0A5G2QP21_PIG	307154		-8.1	ENFSCLTR	RT: 49.22
iNS7-R1-1_SW_RA8_01_8013	Malate dehydrogenase 1 OS=Sus scrofa OX=9823 GN=MDH1 PE=1 SV=1	tr|A0A5G2QP21|A0A5G2QP21_PIG	111701		-1.6	ENFSCLTRLDHNR	RT: 39.9
iNS7-R1-1_SW_RA8_01_8013	Malate dehydrogenase 1 OS=Sus scrofa OX=9823 GN=MDH1 PE=1 SV=1	tr|A0A5G2QP21|A0A5G2QP21_PIG	23845		-4.8	LDHNRAK	RT: 46.99
iNS7-R1-1_SW_RA8_01_8013	Malate dehydrogenase 1 OS=Sus scrofa OX=9823 GN=MDH1 PE=1 SV=1	tr|A0A5G2QP21|A0A5G2QP21_PIG	94658		-5.7	LGVTSDDVK	RT: 43.38
iNS7-R1-1_SW_RA8_01_8013	Malate dehydrogenase 1 OS=Sus scrofa OX=9823 GN=MDH1 PE=1 SV=1	tr|A0A5G2QP21|A0A5G2QP21_PIG	148561		-5.4	GEFITTVQQR	RT: 59.52
iNS7-R1-1_SW_RA8_01_8013	Malate dehydrogenase 1 OS=Sus scrofa OX=9823 GN=MDH1 PE=1 SV=1	tr|A0A5G2QP21|A0A5G2QP21_PIG	75753		0.7	GEFITTVQQRGAAVIK	RT: 68.69
iNS7-R1-1_SW_RA8_01_8013	Malate dehydrogenase 1 OS=Sus scrofa OX=9823 GN=MDH1 PE=1 SV=1	tr|A0A5G2QP21|A0A5G2QP21_PIG	11001		2.2	KLSSAMSAAK	RT: 30.99
iNS7-R1-1_SW_RA8_01_8013	Malate dehydrogenase 1 OS=Sus scrofa OX=9823 GN=MDH1 PE=1 SV=1	tr|A0A5G2QP21|A0A5G2QP21_PIG	116698		-0.1	KLSSAMSAAK	RT: 45.75
iNS7-R1-1_SW_RA8_01_8013	Malate dehydrogenase 1 OS=Sus scrofa OX=9823 GN=MDH1 PE=1 SV=1	tr|A0A5G2QP21|A0A5G2QP21_PIG	107217		-5.1	LSSAMSAAK	RT: 73.21
iNS7-R1-1_SW_RA8_01_8013	Malate dehydrogenase 1 OS=Sus scrofa OX=9823 GN=MDH1 PE=1 SV=1	tr|A0A5G2QP21|A0A5G2QP21_PIG	78793		-4.8	LSSAMSAAKAICDHVR	RT: 152.61
iNS7-R1-1_SW_RA8_01_8013	Malate dehydrogenase 1 OS=Sus scrofa OX=9823 GN=MDH1 PE=1 SV=1	tr|A0A5G2QP21|A0A5G2QP21_PIG	172216		-6.2	AICDHVR	RT: 37.81
iNS7-R1-1_SW_RA8_01_8013	Malate dehydrogenase 1 OS=Sus scrofa OX=9823 GN=MDH1 PE=1 SV=1	tr|A0A5G2QP21|A0A5G2QP21_PIG	274740		8	IVEGLPINDFSR	RT: 82.05
iNS7-R1-1_SW_RA8_01_8013	Malate dehydrogenase 1 OS=Sus scrofa OX=9823 GN=MDH1 PE=1 SV=1	tr|A0A5G2QP21|A0A5G2QP21_PIG	267140		8.3	IVEGLPINDFSR	RT: 82.05
iNS7-R1-1_SW_RA8_01_8013	Malate dehydrogenase 1 OS=Sus scrofa OX=9823 GN=MDH1 PE=1 SV=1	tr|A0A5G2QP21|A0A5G2QP21_PIG	17746		4.9	IVEGLPINDFSREK	RT: 106.93
iNS7-R1-1_SW_RA8_01_8013	Malate dehydrogenase 1 OS=Sus scrofa OX=9823 GN=MDH1 PE=1 SV=1	tr|A0A5G2QP21|A0A5G2QP21_PIG	68400		-3.6	EKMDLTAK	RT: 52.41
iNS7-R1-1_SW_RA8_01_8013	Malate dehydrogenase 1 OS=Sus scrofa OX=9823 GN=MDH1 PE=1 SV=1	tr|A0A5G2QP21|A0A5G2QP21_PIG	102581		-1.1	ELAEEKETAFEFLSSA	RT: 117.65
iNS7-R2-1_SW_RB5_01_8019	Malate dehydrogenase 1 OS=Sus scrofa OX=9823 GN=MDH1 PE=1 SV=1	tr|A0A5G2QP21|A0A5G2QP21_PIG	72473		-1.8	MVIVVGNPANTNCLTASKSAPSIPK	RT: 128.36
iNS7-R2-1_SW_RB5_01_8019	Malate dehydrogenase 1 OS=Sus scrofa OX=9823 GN=MDH1 PE=1 SV=1	tr|A0A5G2QP21|A0A5G2QP21_PIG	42843		5.1	SAPSIPKENFSCLTR	RT: 71.37
iNS7-R2-1_SW_RB5_01_8019	Malate dehydrogenase 1 OS=Sus scrofa OX=9823 GN=MDH1 PE=1 SV=1	tr|A0A5G2QP21|A0A5G2QP21_PIG	35758		-7.7	SAPSIPKENFSCLTR	RT: 71.37
iNS7-R2-1_SW_RB5_01_8019	Malate dehydrogenase 1 OS=Sus scrofa OX=9823 GN=MDH1 PE=1 SV=1	tr|A0A5G2QP21|A0A5G2QP21_PIG	65721		3.6	ENFSCLTR	RT: 48.97
iNS7-R2-1_SW_RB5_01_8019	Malate dehydrogenase 1 OS=Sus scrofa OX=9823 GN=MDH1 PE=1 SV=1	tr|A0A5G2QP21|A0A5G2QP21_PIG	40698		-1.4	ENFSCLTRLDHNR	RT: 39.43
iNS7-R2-1_SW_RB5_01_8019	Malate dehydrogenase 1 OS=Sus scrofa OX=9823 GN=MDH1 PE=1 SV=1	tr|A0A5G2QP21|A0A5G2QP21_PIG	27173		2.2	LDHNRAK	RT: 47.92
iNS7-R2-1_SW_RB5_01_8019	Malate dehydrogenase 1 OS=Sus scrofa OX=9823 GN=MDH1 PE=1 SV=1	tr|A0A5G2QP21|A0A5G2QP21_PIG	11419		0.9	LGVTSDDVK	RT: 38.8
iNS7-R2-1_SW_RB5_01_8019	Malate dehydrogenase 1 OS=Sus scrofa OX=9823 GN=MDH1 PE=1 SV=1	tr|A0A5G2QP21|A0A5G2QP21_PIG	1520		0.8	GEFITTVQQR	RT: 60.58
iNS7-R2-1_SW_RB5_01_8019	Malate dehydrogenase 1 OS=Sus scrofa OX=9823 GN=MDH1 PE=1 SV=1	tr|A0A5G2QP21|A0A5G2QP21_PIG	2128		1.7	GEFITTVQQRGAAVIK	RT: 72.58
iNS7-R2-1_SW_RB5_01_8019	Malate dehydrogenase 1 OS=Sus scrofa OX=9823 GN=MDH1 PE=1 SV=1	tr|A0A5G2QP21|A0A5G2QP21_PIG	4997		-1.6	KLSSAMSAAK	RT: 29.68
iNS7-R2-1_SW_RB5_01_8019	Malate dehydrogenase 1 OS=Sus scrofa OX=9823 GN=MDH1 PE=1 SV=1	tr|A0A5G2QP21|A0A5G2QP21_PIG	8588		-6	KLSSAMSAAK	RT: 41.1
iNS7-R2-1_SW_RB5_01_8019	Malate dehydrogenase 1 OS=Sus scrofa OX=9823 GN=MDH1 PE=1 SV=1	tr|A0A5G2QP21|A0A5G2QP21_PIG	2280		-3.5	LSSAMSAAK	RT: 72.29
iNS7-R2-1_SW_RB5_01_8019	Malate dehydrogenase 1 OS=Sus scrofa OX=9823 GN=MDH1 PE=1 SV=1	tr|A0A5G2QP21|A0A5G2QP21_PIG	21197		-9.6	LSSAMSAAKAICDHVR	RT: 152.67
iNS7-R2-1_SW_RB5_01_8019	Malate dehydrogenase 1 OS=Sus scrofa OX=9823 GN=MDH1 PE=1 SV=1	tr|A0A5G2QP21|A0A5G2QP21_PIG	30476		5.7	AICDHVR	RT: 39.57
iNS7-R2-1_SW_RB5_01_8019	Malate dehydrogenase 1 OS=Sus scrofa OX=9823 GN=MDH1 PE=1 SV=1	tr|A0A5G2QP21|A0A5G2QP21_PIG	127547		-3.6	IVEGLPINDFSR	RT: 99.7
iNS7-R2-1_SW_RB5_01_8019	Malate dehydrogenase 1 OS=Sus scrofa OX=9823 GN=MDH1 PE=1 SV=1	tr|A0A5G2QP21|A0A5G2QP21_PIG	122702		-3.6	IVEGLPINDFSR	RT: 99.7
iNS7-R2-1_SW_RB5_01_8019	Malate dehydrogenase 1 OS=Sus scrofa OX=9823 GN=MDH1 PE=1 SV=1	tr|A0A5G2QP21|A0A5G2QP21_PIG	8702		1.1	IVEGLPINDFSREK	RT: 103.94
iNS7-R2-1_SW_RB5_01_8019	Malate dehydrogenase 1 OS=Sus scrofa OX=9823 GN=MDH1 PE=1 SV=1	tr|A0A5G2QP21|A0A5G2QP21_PIG	2204		-1.9	EKMDLTAK	RT: 51.89
iNS7-R2-1_SW_RB5_01_8019	Malate dehydrogenase 1 OS=Sus scrofa OX=9823 GN=MDH1 PE=1 SV=1	tr|A0A5G2QP21|A0A5G2QP21_PIG	2185		-3.1	ELAEEKETAFEFLSSA	RT: 114.36
iNS7-R3-1_SW_RC5_01_8031	Malate dehydrogenase 1 OS=Sus scrofa OX=9823 GN=MDH1 PE=1 SV=1	tr|A0A5G2QP21|A0A5G2QP21_PIG	63574		-7.4	MVIVVGNPANTNCLTASKSAPSIPK	RT: 127.04
iNS7-R3-1_SW_RC5_01_8031	Malate dehydrogenase 1 OS=Sus scrofa OX=9823 GN=MDH1 PE=1 SV=1	tr|A0A5G2QP21|A0A5G2QP21_PIG	38988		-3.3	SAPSIPKENFSCLTR	RT: 68.38
iNS7-R3-1_SW_RC5_01_8031	Malate dehydrogenase 1 OS=Sus scrofa OX=9823 GN=MDH1 PE=1 SV=1	tr|A0A5G2QP21|A0A5G2QP21_PIG	1493112		-1.6	SAPSIPKENFSCLTR	RT: 68.38
iNS7-R3-1_SW_RC5_01_8031	Malate dehydrogenase 1 OS=Sus scrofa OX=9823 GN=MDH1 PE=1 SV=1	tr|A0A5G2QP21|A0A5G2QP21_PIG	814249		-2.8	ENFSCLTR	RT: 50.79
iNS7-R3-1_SW_RC5_01_8031	Malate dehydrogenase 1 OS=Sus scrofa OX=9823 GN=MDH1 PE=1 SV=1	tr|A0A5G2QP21|A0A5G2QP21_PIG	422484		-2.9	ENFSCLTRLDHNR	RT: 40.72
iNS7-R3-1_SW_RC5_01_8031	Malate dehydrogenase 1 OS=Sus scrofa OX=9823 GN=MDH1 PE=1 SV=1	tr|A0A5G2QP21|A0A5G2QP21_PIG	48298		0.6	LDHNRAK	RT: 46.48
iNS7-R3-1_SW_RC5_01_8031	Malate dehydrogenase 1 OS=Sus scrofa OX=9823 GN=MDH1 PE=1 SV=1	tr|A0A5G2QP21|A0A5G2QP21_PIG	102087		1	LGVTSDDVK	RT: 39.61
iNS7-R3-1_SW_RC5_01_8031	Malate dehydrogenase 1 OS=Sus scrofa OX=9823 GN=MDH1 PE=1 SV=1	tr|A0A5G2QP21|A0A5G2QP21_PIG	989273		-1.1	GEFITTVQQR	RT: 57.25
iNS7-R3-1_SW_RC5_01_8031	Malate dehydrogenase 1 OS=Sus scrofa OX=9823 GN=MDH1 PE=1 SV=1	tr|A0A5G2QP21|A0A5G2QP21_PIG	104291		0.1	GEFITTVQQRGAAVIK	RT: 68.58
iNS7-R3-1_SW_RC5_01_8031	Malate dehydrogenase 1 OS=Sus scrofa OX=9823 GN=MDH1 PE=1 SV=1	tr|A0A5G2QP21|A0A5G2QP21_PIG	15922		-4.3	KLSSAMSAAK	RT: 29.45
iNS7-R3-1_SW_RC5_01_8031	Malate dehydrogenase 1 OS=Sus scrofa OX=9823 GN=MDH1 PE=1 SV=1	tr|A0A5G2QP21|A0A5G2QP21_PIG	95798		3.3	KLSSAMSAAK	RT: 43.07
iNS7-R3-1_SW_RC5_01_8031	Malate dehydrogenase 1 OS=Sus scrofa OX=9823 GN=MDH1 PE=1 SV=1	tr|A0A5G2QP21|A0A5G2QP21_PIG	606157		-1.4	LSSAMSAAK	RT: 74.77
iNS7-R3-1_SW_RC5_01_8031	Malate dehydrogenase 1 OS=Sus scrofa OX=9823 GN=MDH1 PE=1 SV=1	tr|A0A5G2QP21|A0A5G2QP21_PIG	82707		1.1	LSSAMSAAKAICDHVR	RT: 156.21
iNS7-R3-1_SW_RC5_01_8031	Malate dehydrogenase 1 OS=Sus scrofa OX=9823 GN=MDH1 PE=1 SV=1	tr|A0A5G2QP21|A0A5G2QP21_PIG	332253		-2.9	AICDHVR	RT: 37.44
iNS7-R3-1_SW_RC5_01_8031	Malate dehydrogenase 1 OS=Sus scrofa OX=9823 GN=MDH1 PE=1 SV=1	tr|A0A5G2QP21|A0A5G2QP21_PIG	3267658		0.4	IVEGLPINDFSR	RT: 68.24
iNS7-R3-1_SW_RC5_01_8031	Malate dehydrogenase 1 OS=Sus scrofa OX=9823 GN=MDH1 PE=1 SV=1	tr|A0A5G2QP21|A0A5G2QP21_PIG	3309287		0.4	IVEGLPINDFSR	RT: 68.24
iNS7-R3-1_SW_RC5_01_8031	Malate dehydrogenase 1 OS=Sus scrofa OX=9823 GN=MDH1 PE=1 SV=1	tr|A0A5G2QP21|A0A5G2QP21_PIG	6213		-5	IVEGLPINDFSREK	RT: 108.83
iNS7-R3-1_SW_RC5_01_8031	Malate dehydrogenase 1 OS=Sus scrofa OX=9823 GN=MDH1 PE=1 SV=1	tr|A0A5G2QP21|A0A5G2QP21_PIG	117610		-1.9	EKMDLTAK	RT: 51.49
iNS7-R3-1_SW_RC5_01_8031	Malate dehydrogenase 1 OS=Sus scrofa OX=9823 GN=MDH1 PE=1 SV=1	tr|A0A5G2QP21|A0A5G2QP21_PIG	56924		-1.5	ELAEEKETAFEFLSSA	RT: 121.01
PEF-R1-1_SW_RA7_01_8012	Malate dehydrogenase 1 OS=Sus scrofa OX=9823 GN=MDH1 PE=1 SV=1	tr|A0A5G2QP21|A0A5G2QP21_PIG	31768		-4.3	MVIVVGNPANTNCLTASKSAPSIPK	RT: 124.41
PEF-R1-1_SW_RA7_01_8012	Malate dehydrogenase 1 OS=Sus scrofa OX=9823 GN=MDH1 PE=1 SV=1	tr|A0A5G2QP21|A0A5G2QP21_PIG	15580		-4.7	SAPSIPKENFSCLTR	RT: 72.03
PEF-R1-1_SW_RA7_01_8012	Malate dehydrogenase 1 OS=Sus scrofa OX=9823 GN=MDH1 PE=1 SV=1	tr|A0A5G2QP21|A0A5G2QP21_PIG	288154		-4.5	SAPSIPKENFSCLTR	RT: 72.03
PEF-R1-1_SW_RA7_01_8012	Malate dehydrogenase 1 OS=Sus scrofa OX=9823 GN=MDH1 PE=1 SV=1	tr|A0A5G2QP21|A0A5G2QP21_PIG	115387		-4	ENFSCLTR	RT: 51.33
PEF-R1-1_SW_RA7_01_8012	Malate dehydrogenase 1 OS=Sus scrofa OX=9823 GN=MDH1 PE=1 SV=1	tr|A0A5G2QP21|A0A5G2QP21_PIG	175446		-6.8	ENFSCLTRLDHNR	RT: 38.16
PEF-R1-1_SW_RA7_01_8012	Malate dehydrogenase 1 OS=Sus scrofa OX=9823 GN=MDH1 PE=1 SV=1	tr|A0A5G2QP21|A0A5G2QP21_PIG	25460		-3.5	LDHNRAK	RT: 47.77
PEF-R1-1_SW_RA7_01_8012	Malate dehydrogenase 1 OS=Sus scrofa OX=9823 GN=MDH1 PE=1 SV=1	tr|A0A5G2QP21|A0A5G2QP21_PIG	81149		-3	LGVTSDDVK	RT: 44.84
PEF-R1-1_SW_RA7_01_8012	Malate dehydrogenase 1 OS=Sus scrofa OX=9823 GN=MDH1 PE=1 SV=1	tr|A0A5G2QP21|A0A5G2QP21_PIG	117686		-2.5	GEFITTVQQR	RT: 59.47
PEF-R1-1_SW_RA7_01_8012	Malate dehydrogenase 1 OS=Sus scrofa OX=9823 GN=MDH1 PE=1 SV=1	tr|A0A5G2QP21|A0A5G2QP21_PIG	85063		-3	GEFITTVQQRGAAVIK	RT: 65.26
PEF-R1-1_SW_RA7_01_8012	Malate dehydrogenase 1 OS=Sus scrofa OX=9823 GN=MDH1 PE=1 SV=1	tr|A0A5G2QP21|A0A5G2QP21_PIG	39520		0.7	KLSSAMSAAK	RT: 31.07
PEF-R1-1_SW_RA7_01_8012	Malate dehydrogenase 1 OS=Sus scrofa OX=9823 GN=MDH1 PE=1 SV=1	tr|A0A5G2QP21|A0A5G2QP21_PIG	85709		1.7	KLSSAMSAAK	RT: 45.76
PEF-R1-1_SW_RA7_01_8012	Malate dehydrogenase 1 OS=Sus scrofa OX=9823 GN=MDH1 PE=1 SV=1	tr|A0A5G2QP21|A0A5G2QP21_PIG	133703		-7.3	LSSAMSAAK	RT: 70.62
PEF-R1-1_SW_RA7_01_8012	Malate dehydrogenase 1 OS=Sus scrofa OX=9823 GN=MDH1 PE=1 SV=1	tr|A0A5G2QP21|A0A5G2QP21_PIG	44650		-4.4	LSSAMSAAKAICDHVR	RT: 148.91
PEF-R1-1_SW_RA7_01_8012	Malate dehydrogenase 1 OS=Sus scrofa OX=9823 GN=MDH1 PE=1 SV=1	tr|A0A5G2QP21|A0A5G2QP21_PIG	184756		-3.8	AICDHVR	RT: 34.83
PEF-R1-1_SW_RA7_01_8012	Malate dehydrogenase 1 OS=Sus scrofa OX=9823 GN=MDH1 PE=1 SV=1	tr|A0A5G2QP21|A0A5G2QP21_PIG	337250		-5	IVEGLPINDFSR	RT: 72.03
PEF-R1-1_SW_RA7_01_8012	Malate dehydrogenase 1 OS=Sus scrofa OX=9823 GN=MDH1 PE=1 SV=1	tr|A0A5G2QP21|A0A5G2QP21_PIG	318801		-5.4	IVEGLPINDFSR	RT: 72.03
PEF-R1-1_SW_RA7_01_8012	Malate dehydrogenase 1 OS=Sus scrofa OX=9823 GN=MDH1 PE=1 SV=1	tr|A0A5G2QP21|A0A5G2QP21_PIG	39976		2.2	IVEGLPINDFSREK	RT: 108.82
PEF-R1-1_SW_RA7_01_8012	Malate dehydrogenase 1 OS=Sus scrofa OX=9823 GN=MDH1 PE=1 SV=1	tr|A0A5G2QP21|A0A5G2QP21_PIG	41819		-2.7	EKMDLTAK	RT: 56.18
PEF-R1-1_SW_RA7_01_8012	Malate dehydrogenase 1 OS=Sus scrofa OX=9823 GN=MDH1 PE=1 SV=1	tr|A0A5G2QP21|A0A5G2QP21_PIG	104082		-1.5	ELAEEKETAFEFLSSA	RT: 115.9
PEF-R2-1_SW_RB4_01_8018	Malate dehydrogenase 1 OS=Sus scrofa OX=9823 GN=MDH1 PE=1 SV=1	tr|A0A5G2QP21|A0A5G2QP21_PIG	5643		-1.5	MVIVVGNPANTNCLTASKSAPSIPK	RT: 127.31
PEF-R2-1_SW_RB4_01_8018	Malate dehydrogenase 1 OS=Sus scrofa OX=9823 GN=MDH1 PE=1 SV=1	tr|A0A5G2QP21|A0A5G2QP21_PIG	5016		1.4	SAPSIPKENFSCLTR	RT: 71.23
PEF-R2-1_SW_RB4_01_8018	Malate dehydrogenase 1 OS=Sus scrofa OX=9823 GN=MDH1 PE=1 SV=1	tr|A0A5G2QP21|A0A5G2QP21_PIG	63992		-6.9	SAPSIPKENFSCLTR	RT: 71.23
PEF-R2-1_SW_RB4_01_8018	Malate dehydrogenase 1 OS=Sus scrofa OX=9823 GN=MDH1 PE=1 SV=1	tr|A0A5G2QP21|A0A5G2QP21_PIG	7923		-5.1	ENFSCLTR	RT: 51.56
PEF-R2-1_SW_RB4_01_8018	Malate dehydrogenase 1 OS=Sus scrofa OX=9823 GN=MDH1 PE=1 SV=1	tr|A0A5G2QP21|A0A5G2QP21_PIG	39786		-4.3	ENFSCLTRLDHNR	RT: 39.43
PEF-R2-1_SW_RB4_01_8018	Malate dehydrogenase 1 OS=Sus scrofa OX=9823 GN=MDH1 PE=1 SV=1	tr|A0A5G2QP21|A0A5G2QP21_PIG	7904		-1	LDHNRAK	RT: 45.84
PEF-R2-1_SW_RB4_01_8018	Malate dehydrogenase 1 OS=Sus scrofa OX=9823 GN=MDH1 PE=1 SV=1	tr|A0A5G2QP21|A0A5G2QP21_PIG	30799		2.1	LGVTSDDVK	RT: 35.53
PEF-R2-1_SW_RB4_01_8018	Malate dehydrogenase 1 OS=Sus scrofa OX=9823 GN=MDH1 PE=1 SV=1	tr|A0A5G2QP21|A0A5G2QP21_PIG	74062		-3.4	GEFITTVQQR	RT: 59.82
PEF-R2-1_SW_RB4_01_8018	Malate dehydrogenase 1 OS=Sus scrofa OX=9823 GN=MDH1 PE=1 SV=1	tr|A0A5G2QP21|A0A5G2QP21_PIG	10469		-1.2	GEFITTVQQRGAAVIK	RT: 70.95
PEF-R2-1_SW_RB4_01_8018	Malate dehydrogenase 1 OS=Sus scrofa OX=9823 GN=MDH1 PE=1 SV=1	tr|A0A5G2QP21|A0A5G2QP21_PIG	6707		-1.2	KLSSAMSAAK	RT: 34.07
PEF-R2-1_SW_RB4_01_8018	Malate dehydrogenase 1 OS=Sus scrofa OX=9823 GN=MDH1 PE=1 SV=1	tr|A0A5G2QP21|A0A5G2QP21_PIG	15713		-9	KLSSAMSAAK	RT: 42.77
PEF-R2-1_SW_RB4_01_8018	Malate dehydrogenase 1 OS=Sus scrofa OX=9823 GN=MDH1 PE=1 SV=1	tr|A0A5G2QP21|A0A5G2QP21_PIG	38323		-1.3	LSSAMSAAK	RT: 71.24
PEF-R2-1_SW_RB4_01_8018	Malate dehydrogenase 1 OS=Sus scrofa OX=9823 GN=MDH1 PE=1 SV=1	tr|A0A5G2QP21|A0A5G2QP21_PIG	5263		-4.9	LSSAMSAAKAICDHVR	RT: 150.06
PEF-R2-1_SW_RB4_01_8018	Malate dehydrogenase 1 OS=Sus scrofa OX=9823 GN=MDH1 PE=1 SV=1	tr|A0A5G2QP21|A0A5G2QP21_PIG	46132		-0.6	AICDHVR	RT: 38.94
PEF-R2-1_SW_RB4_01_8018	Malate dehydrogenase 1 OS=Sus scrofa OX=9823 GN=MDH1 PE=1 SV=1	tr|A0A5G2QP21|A0A5G2QP21_PIG	81339		-2.2	IVEGLPINDFSR	RT: 58.85
PEF-R2-1_SW_RB4_01_8018	Malate dehydrogenase 1 OS=Sus scrofa OX=9823 GN=MDH1 PE=1 SV=1	tr|A0A5G2QP21|A0A5G2QP21_PIG	101441		-2.6	IVEGLPINDFSR	RT: 58.85
PEF-R2-1_SW_RB4_01_8018	Malate dehydrogenase 1 OS=Sus scrofa OX=9823 GN=MDH1 PE=1 SV=1	tr|A0A5G2QP21|A0A5G2QP21_PIG	3230		3.6	IVEGLPINDFSREK	RT: 106.52
PEF-R2-1_SW_RB4_01_8018	Malate dehydrogenase 1 OS=Sus scrofa OX=9823 GN=MDH1 PE=1 SV=1	tr|A0A5G2QP21|A0A5G2QP21_PIG	1254		-0.3	EKMDLTAK	RT: 53.3
PEF-R2-1_SW_RB4_01_8018	Malate dehydrogenase 1 OS=Sus scrofa OX=9823 GN=MDH1 PE=1 SV=1	tr|A0A5G2QP21|A0A5G2QP21_PIG	7923		-4.5	ELAEEKETAFEFLSSA	RT: 114.43
PEF-R3-1_SW_RC1_01_8030	Malate dehydrogenase 1 OS=Sus scrofa OX=9823 GN=MDH1 PE=1 SV=1	tr|A0A5G2QP21|A0A5G2QP21_PIG	17423		-0.8	MVIVVGNPANTNCLTASKSAPSIPK	RT: 127.95
PEF-R3-1_SW_RC1_01_8030	Malate dehydrogenase 1 OS=Sus scrofa OX=9823 GN=MDH1 PE=1 SV=1	tr|A0A5G2QP21|A0A5G2QP21_PIG	12160		-6	SAPSIPKENFSCLTR	RT: 64.95
PEF-R3-1_SW_RC1_01_8030	Malate dehydrogenase 1 OS=Sus scrofa OX=9823 GN=MDH1 PE=1 SV=1	tr|A0A5G2QP21|A0A5G2QP21_PIG	99541		-4.2	SAPSIPKENFSCLTR	RT: 64.95
PEF-R3-1_SW_RC1_01_8030	Malate dehydrogenase 1 OS=Sus scrofa OX=9823 GN=MDH1 PE=1 SV=1	tr|A0A5G2QP21|A0A5G2QP21_PIG	51889		-4.3	ENFSCLTR	RT: 47.44
PEF-R3-1_SW_RC1_01_8030	Malate dehydrogenase 1 OS=Sus scrofa OX=9823 GN=MDH1 PE=1 SV=1	tr|A0A5G2QP21|A0A5G2QP21_PIG	53466		-1.7	ENFSCLTRLDHNR	RT: 37.97
PEF-R3-1_SW_RC1_01_8030	Malate dehydrogenase 1 OS=Sus scrofa OX=9823 GN=MDH1 PE=1 SV=1	tr|A0A5G2QP21|A0A5G2QP21_PIG	12274		-5.2	LDHNRAK	RT: 45.26
PEF-R3-1_SW_RC1_01_8030	Malate dehydrogenase 1 OS=Sus scrofa OX=9823 GN=MDH1 PE=1 SV=1	tr|A0A5G2QP21|A0A5G2QP21_PIG	121125		-5.1	LGVTSDDVK	RT: 44.84
PEF-R3-1_SW_RC1_01_8030	Malate dehydrogenase 1 OS=Sus scrofa OX=9823 GN=MDH1 PE=1 SV=1	tr|A0A5G2QP21|A0A5G2QP21_PIG	147820		-5	GEFITTVQQR	RT: 56.11
PEF-R3-1_SW_RC1_01_8030	Malate dehydrogenase 1 OS=Sus scrofa OX=9823 GN=MDH1 PE=1 SV=1	tr|A0A5G2QP21|A0A5G2QP21_PIG	25327		3.4	GEFITTVQQRGAAVIK	RT: 70.23
PEF-R3-1_SW_RC1_01_8030	Malate dehydrogenase 1 OS=Sus scrofa OX=9823 GN=MDH1 PE=1 SV=1	tr|A0A5G2QP21|A0A5G2QP21_PIG	16169		6.4	KLSSAMSAAK	RT: 29.53
PEF-R3-1_SW_RC1_01_8030	Malate dehydrogenase 1 OS=Sus scrofa OX=9823 GN=MDH1 PE=1 SV=1	tr|A0A5G2QP21|A0A5G2QP21_PIG	73815		0.1	KLSSAMSAAK	RT: 46.59
PEF-R3-1_SW_RC1_01_8030	Malate dehydrogenase 1 OS=Sus scrofa OX=9823 GN=MDH1 PE=1 SV=1	tr|A0A5G2QP21|A0A5G2QP21_PIG	81510		-5.6	LSSAMSAAK	RT: 75.09
PEF-R3-1_SW_RC1_01_8030	Malate dehydrogenase 1 OS=Sus scrofa OX=9823 GN=MDH1 PE=1 SV=1	tr|A0A5G2QP21|A0A5G2QP21_PIG	27835		-6.3	LSSAMSAAKAICDHVR	RT: 151.42
PEF-R3-1_SW_RC1_01_8030	Malate dehydrogenase 1 OS=Sus scrofa OX=9823 GN=MDH1 PE=1 SV=1	tr|A0A5G2QP21|A0A5G2QP21_PIG	136838		-7.4	AICDHVR	RT: 33.85
PEF-R3-1_SW_RC1_01_8030	Malate dehydrogenase 1 OS=Sus scrofa OX=9823 GN=MDH1 PE=1 SV=1	tr|A0A5G2QP21|A0A5G2QP21_PIG	171304		-6.9	IVEGLPINDFSR	RT: 56.25
PEF-R3-1_SW_RC1_01_8030	Malate dehydrogenase 1 OS=Sus scrofa OX=9823 GN=MDH1 PE=1 SV=1	tr|A0A5G2QP21|A0A5G2QP21_PIG	144248		-6.5	IVEGLPINDFSR	RT: 56.25
PEF-R3-1_SW_RC1_01_8030	Malate dehydrogenase 1 OS=Sus scrofa OX=9823 GN=MDH1 PE=1 SV=1	tr|A0A5G2QP21|A0A5G2QP21_PIG	3705		2.2	IVEGLPINDFSREK	RT: 107.22
PEF-R3-1_SW_RC1_01_8030	Malate dehydrogenase 1 OS=Sus scrofa OX=9823 GN=MDH1 PE=1 SV=1	tr|A0A5G2QP21|A0A5G2QP21_PIG	135736		-4.9	EKMDLTAK	RT: 50.68
PEF-R3-1_SW_RC1_01_8030	Malate dehydrogenase 1 OS=Sus scrofa OX=9823 GN=MDH1 PE=1 SV=1	tr|A0A5G2QP21|A0A5G2QP21_PIG	40166		-0.7	ELAEEKETAFEFLSSA	RT: 115.14

## Sheet: A0A5G2QRL2
Replicate	Protein Description	Protein Name	Total Area		Average Mass Error PPM	Peptide Sequence	Peptide Result
iNS15-R1-1_SW_RB1_01_8014	PDZ and LIM domain 1 OS=Sus scrofa OX=9823 GN=PDLIM1 PE=1 SV=2	tr|A0A5G2QRL2|A0A5G2QRL2_PIG	236056		-4.4	MTTQQIVLQGPGPWGFR	RT: 145.92
iNS15-R1-1_SW_RB1_01_8014	PDZ and LIM domain 1 OS=Sus scrofa OX=9823 GN=PDLIM1 PE=1 SV=2	tr|A0A5G2QRL2|A0A5G2QRL2_PIG	1539		-5.2	LVGGKDFEQPLAISR	RT: 64.44
iNS15-R1-1_SW_RB1_01_8014	PDZ and LIM domain 1 OS=Sus scrofa OX=9823 GN=PDLIM1 PE=1 SV=2	tr|A0A5G2QRL2|A0A5G2QRL2_PIG	3531796		-9.1	LVGGKDFEQPLAISR	RT: 64.44
iNS15-R1-1_SW_RB1_01_8014	PDZ and LIM domain 1 OS=Sus scrofa OX=9823 GN=PDLIM1 PE=1 SV=2	tr|A0A5G2QRL2|A0A5G2QRL2_PIG	1980712		-6	IKGCTDNMTLTVAR	RT: 67.92
iNS15-R1-1_SW_RB1_01_8014	PDZ and LIM domain 1 OS=Sus scrofa OX=9823 GN=PDLIM1 PE=1 SV=2	tr|A0A5G2QRL2|A0A5G2QRL2_PIG	2510565		-4.7	GCTDNMTLTVAR	RT: 67.92
iNS15-R1-1_SW_RB1_01_8014	PDZ and LIM domain 1 OS=Sus scrofa OX=9823 GN=PDLIM1 PE=1 SV=2	tr|A0A5G2QRL2|A0A5G2QRL2_PIG	44479		0.8	IWSPLVTEEGKR	RT: 26.82
iNS15-R1-1_SW_RB1_01_8014	PDZ and LIM domain 1 OS=Sus scrofa OX=9823 GN=PDLIM1 PE=1 SV=2	tr|A0A5G2QRL2|A0A5G2QRL2_PIG	2221271		-8.8	SAMPFTASPASSASPR	RT: 65.9
iNS15-R1-1_SW_RB1_01_8014	PDZ and LIM domain 1 OS=Sus scrofa OX=9823 GN=PDLIM1 PE=1 SV=2	tr|A0A5G2QRL2|A0A5G2QRL2_PIG	2266548		-8.6	SAMPFTASPASSASPR	RT: 65.9
iNS15-R1-1_SW_RB1_01_8014	PDZ and LIM domain 1 OS=Sus scrofa OX=9823 GN=PDLIM1 PE=1 SV=2	tr|A0A5G2QRL2|A0A5G2QRL2_PIG	196270		-4.7	SAMPFTASPASSASPR	RT: 35.24
iNS15-R1-1_SW_RB1_01_8014	PDZ and LIM domain 1 OS=Sus scrofa OX=9823 GN=PDLIM1 PE=1 SV=2	tr|A0A5G2QRL2|A0A5G2QRL2_PIG	48602		-3.7	IITNQYNNPAGLYSSENISSFNSALESK	RT: 115.91
iNS15-R1-1_SW_RB1_01_8014	PDZ and LIM domain 1 OS=Sus scrofa OX=9823 GN=PDLIM1 PE=1 SV=2	tr|A0A5G2QRL2|A0A5G2QRL2_PIG	219583		-4.5	TAASGQETNGR	RT: 35.24
iNS15-R1-1_SW_RB1_01_8014	PDZ and LIM domain 1 OS=Sus scrofa OX=9823 GN=PDLIM1 PE=1 SV=2	tr|A0A5G2QRL2|A0A5G2QRL2_PIG	22135		-1.4	ALDHSQLPSGLVIDK	RT: 30.45
iNS15-R1-1_SW_RB1_01_8014	PDZ and LIM domain 1 OS=Sus scrofa OX=9823 GN=PDLIM1 PE=1 SV=2	tr|A0A5G2QRL2|A0A5G2QRL2_PIG	161823		-3.1	ESEVYKMLQEK	RT: 46.93
iNS15-R1-1_SW_RB1_01_8014	PDZ and LIM domain 1 OS=Sus scrofa OX=9823 GN=PDLIM1 PE=1 SV=2	tr|A0A5G2QRL2|A0A5G2QRL2_PIG	351234		-5.2	MLQEKQELNEPPK	RT: 73.91
iNS15-R1-1_SW_RB1_01_8014	PDZ and LIM domain 1 OS=Sus scrofa OX=9823 GN=PDLIM1 PE=1 SV=2	tr|A0A5G2QRL2|A0A5G2QRL2_PIG	365731		-2.5	QELNEPPK	RT: 91.77
iNS15-R1-1_SW_RB1_01_8014	PDZ and LIM domain 1 OS=Sus scrofa OX=9823 GN=PDLIM1 PE=1 SV=2	tr|A0A5G2QRL2|A0A5G2QRL2_PIG	34238		-4	VAASIGNAQK	RT: 31.41
iNS15-R1-1_SW_RB1_01_8014	PDZ and LIM domain 1 OS=Sus scrofa OX=9823 GN=PDLIM1 PE=1 SV=2	tr|A0A5G2QRL2|A0A5G2QRL2_PIG	276412		1.6	VAASIGNAQKLPMCDK	RT: 112.08
iNS15-R1-1_SW_RB1_01_8014	PDZ and LIM domain 1 OS=Sus scrofa OX=9823 GN=PDLIM1 PE=1 SV=2	tr|A0A5G2QRL2|A0A5G2QRL2_PIG	42712		3.8	LPMCDKCGTGIVGVFVK	RT: 82.8
iNS15-R2-1_SW_RB6_01_8020	PDZ and LIM domain 1 OS=Sus scrofa OX=9823 GN=PDLIM1 PE=1 SV=2	tr|A0A5G2QRL2|A0A5G2QRL2_PIG	5871		-3.1	MTTQQIVLQGPGPWGFR	RT: 141.78
iNS15-R2-1_SW_RB6_01_8020	PDZ and LIM domain 1 OS=Sus scrofa OX=9823 GN=PDLIM1 PE=1 SV=2	tr|A0A5G2QRL2|A0A5G2QRL2_PIG	2717		-4.4	LVGGKDFEQPLAISR	RT: 47.02
iNS15-R2-1_SW_RB6_01_8020	PDZ and LIM domain 1 OS=Sus scrofa OX=9823 GN=PDLIM1 PE=1 SV=2	tr|A0A5G2QRL2|A0A5G2QRL2_PIG	44783		-0.5	LVGGKDFEQPLAISR	RT: 47.02
iNS15-R2-1_SW_RB6_01_8020	PDZ and LIM domain 1 OS=Sus scrofa OX=9823 GN=PDLIM1 PE=1 SV=2	tr|A0A5G2QRL2|A0A5G2QRL2_PIG	5396		-3.6	IKGCTDNMTLTVAR	RT: 67.55
iNS15-R2-1_SW_RB6_01_8020	PDZ and LIM domain 1 OS=Sus scrofa OX=9823 GN=PDLIM1 PE=1 SV=2	tr|A0A5G2QRL2|A0A5G2QRL2_PIG	37373		4.6	GCTDNMTLTVAR	RT: 67.48
iNS15-R2-1_SW_RB6_01_8020	PDZ and LIM domain 1 OS=Sus scrofa OX=9823 GN=PDLIM1 PE=1 SV=2	tr|A0A5G2QRL2|A0A5G2QRL2_PIG	1368		-0.3	IWSPLVTEEGKR	RT: 26.42
iNS15-R2-1_SW_RB6_01_8020	PDZ and LIM domain 1 OS=Sus scrofa OX=9823 GN=PDLIM1 PE=1 SV=2	tr|A0A5G2QRL2|A0A5G2QRL2_PIG	144913		-5.8	SAMPFTASPASSASPR	RT: 64.28
iNS15-R2-1_SW_RB6_01_8020	PDZ and LIM domain 1 OS=Sus scrofa OX=9823 GN=PDLIM1 PE=1 SV=2	tr|A0A5G2QRL2|A0A5G2QRL2_PIG	148637		-5.8	SAMPFTASPASSASPR	RT: 64.28
iNS15-R2-1_SW_RB6_01_8020	PDZ and LIM domain 1 OS=Sus scrofa OX=9823 GN=PDLIM1 PE=1 SV=2	tr|A0A5G2QRL2|A0A5G2QRL2_PIG	30115		-3.4	SAMPFTASPASSASPR	RT: 35.05
iNS15-R2-1_SW_RB6_01_8020	PDZ and LIM domain 1 OS=Sus scrofa OX=9823 GN=PDLIM1 PE=1 SV=2	tr|A0A5G2QRL2|A0A5G2QRL2_PIG	912		4.1	IITNQYNNPAGLYSSENISSFNSALESK	RT: 116.04
iNS15-R2-1_SW_RB6_01_8020	PDZ and LIM domain 1 OS=Sus scrofa OX=9823 GN=PDLIM1 PE=1 SV=2	tr|A0A5G2QRL2|A0A5G2QRL2_PIG	29754		0.7	TAASGQETNGR	RT: 34.5
iNS15-R2-1_SW_RB6_01_8020	PDZ and LIM domain 1 OS=Sus scrofa OX=9823 GN=PDLIM1 PE=1 SV=2	tr|A0A5G2QRL2|A0A5G2QRL2_PIG	1235		2.2	ALDHSQLPSGLVIDK	RT: 27.59
iNS15-R2-1_SW_RB6_01_8020	PDZ and LIM domain 1 OS=Sus scrofa OX=9823 GN=PDLIM1 PE=1 SV=2	tr|A0A5G2QRL2|A0A5G2QRL2_PIG	5111		1.2	ESEVYKMLQEK	RT: 48.9
iNS15-R2-1_SW_RB6_01_8020	PDZ and LIM domain 1 OS=Sus scrofa OX=9823 GN=PDLIM1 PE=1 SV=2	tr|A0A5G2QRL2|A0A5G2QRL2_PIG	2242		2.3	MLQEKQELNEPPK	RT: 73.74
iNS15-R2-1_SW_RB6_01_8020	PDZ and LIM domain 1 OS=Sus scrofa OX=9823 GN=PDLIM1 PE=1 SV=2	tr|A0A5G2QRL2|A0A5G2QRL2_PIG	9690		0.1	QELNEPPK	RT: 64.28
iNS15-R2-1_SW_RB6_01_8020	PDZ and LIM domain 1 OS=Sus scrofa OX=9823 GN=PDLIM1 PE=1 SV=2	tr|A0A5G2QRL2|A0A5G2QRL2_PIG	11514		2.9	VAASIGNAQK	RT: 34.57
iNS15-R2-1_SW_RB6_01_8020	PDZ and LIM domain 1 OS=Sus scrofa OX=9823 GN=PDLIM1 PE=1 SV=2	tr|A0A5G2QRL2|A0A5G2QRL2_PIG	380		2	VAASIGNAQKLPMCDK	RT: 115.28
iNS15-R2-1_SW_RB6_01_8020	PDZ and LIM domain 1 OS=Sus scrofa OX=9823 GN=PDLIM1 PE=1 SV=2	tr|A0A5G2QRL2|A0A5G2QRL2_PIG	494		-3.2	LPMCDKCGTGIVGVFVK	RT: 82.65
iNS15-R3-1_SW_RC3_01_8032	PDZ and LIM domain 1 OS=Sus scrofa OX=9823 GN=PDLIM1 PE=1 SV=2	tr|A0A5G2QRL2|A0A5G2QRL2_PIG	37867		1	MTTQQIVLQGPGPWGFR	RT: 145.11
iNS15-R3-1_SW_RC3_01_8032	PDZ and LIM domain 1 OS=Sus scrofa OX=9823 GN=PDLIM1 PE=1 SV=2	tr|A0A5G2QRL2|A0A5G2QRL2_PIG	110637		2.4	LVGGKDFEQPLAISR	RT: 58.33
iNS15-R3-1_SW_RC3_01_8032	PDZ and LIM domain 1 OS=Sus scrofa OX=9823 GN=PDLIM1 PE=1 SV=2	tr|A0A5G2QRL2|A0A5G2QRL2_PIG	110276		2.4	LVGGKDFEQPLAISR	RT: 58.33
iNS15-R3-1_SW_RC3_01_8032	PDZ and LIM domain 1 OS=Sus scrofa OX=9823 GN=PDLIM1 PE=1 SV=2	tr|A0A5G2QRL2|A0A5G2QRL2_PIG	37031		-4.5	IKGCTDNMTLTVAR	RT: 70.17
iNS15-R3-1_SW_RC3_01_8032	PDZ and LIM domain 1 OS=Sus scrofa OX=9823 GN=PDLIM1 PE=1 SV=2	tr|A0A5G2QRL2|A0A5G2QRL2_PIG	287717		-5.3	GCTDNMTLTVAR	RT: 68.14
iNS15-R3-1_SW_RC3_01_8032	PDZ and LIM domain 1 OS=Sus scrofa OX=9823 GN=PDLIM1 PE=1 SV=2	tr|A0A5G2QRL2|A0A5G2QRL2_PIG	37848		-2.8	IWSPLVTEEGKR	RT: 24.18
iNS15-R3-1_SW_RC3_01_8032	PDZ and LIM domain 1 OS=Sus scrofa OX=9823 GN=PDLIM1 PE=1 SV=2	tr|A0A5G2QRL2|A0A5G2QRL2_PIG	6973		6.2	SAMPFTASPASSASPR	RT: 66.05
iNS15-R3-1_SW_RC3_01_8032	PDZ and LIM domain 1 OS=Sus scrofa OX=9823 GN=PDLIM1 PE=1 SV=2	tr|A0A5G2QRL2|A0A5G2QRL2_PIG	201685		4.1	SAMPFTASPASSASPR	RT: 66.05
iNS15-R3-1_SW_RC3_01_8032	PDZ and LIM domain 1 OS=Sus scrofa OX=9823 GN=PDLIM1 PE=1 SV=2	tr|A0A5G2QRL2|A0A5G2QRL2_PIG	60154		0.1	SAMPFTASPASSASPR	RT: 30.44
iNS15-R3-1_SW_RC3_01_8032	PDZ and LIM domain 1 OS=Sus scrofa OX=9823 GN=PDLIM1 PE=1 SV=2	tr|A0A5G2QRL2|A0A5G2QRL2_PIG	19855		-0.6	IITNQYNNPAGLYSSENISSFNSALESK	RT: 111.18
iNS15-R3-1_SW_RC3_01_8032	PDZ and LIM domain 1 OS=Sus scrofa OX=9823 GN=PDLIM1 PE=1 SV=2	tr|A0A5G2QRL2|A0A5G2QRL2_PIG	32718		-0.5	TAASGQETNGR	RT: 37.21
iNS15-R3-1_SW_RC3_01_8032	PDZ and LIM domain 1 OS=Sus scrofa OX=9823 GN=PDLIM1 PE=1 SV=2	tr|A0A5G2QRL2|A0A5G2QRL2_PIG	12635		3.4	ALDHSQLPSGLVIDK	RT: 26.34
iNS15-R3-1_SW_RC3_01_8032	PDZ and LIM domain 1 OS=Sus scrofa OX=9823 GN=PDLIM1 PE=1 SV=2	tr|A0A5G2QRL2|A0A5G2QRL2_PIG	52877		-3	ESEVYKMLQEK	RT: 48.18
iNS15-R3-1_SW_RC3_01_8032	PDZ and LIM domain 1 OS=Sus scrofa OX=9823 GN=PDLIM1 PE=1 SV=2	tr|A0A5G2QRL2|A0A5G2QRL2_PIG	17423		1	MLQEKQELNEPPK	RT: 74.54
iNS15-R3-1_SW_RC3_01_8032	PDZ and LIM domain 1 OS=Sus scrofa OX=9823 GN=PDLIM1 PE=1 SV=2	tr|A0A5G2QRL2|A0A5G2QRL2_PIG	236892		2.2	QELNEPPK	RT: 91.51
iNS15-R3-1_SW_RC3_01_8032	PDZ and LIM domain 1 OS=Sus scrofa OX=9823 GN=PDLIM1 PE=1 SV=2	tr|A0A5G2QRL2|A0A5G2QRL2_PIG	27740		0.4	VAASIGNAQK	RT: 31.07
iNS15-R3-1_SW_RC3_01_8032	PDZ and LIM domain 1 OS=Sus scrofa OX=9823 GN=PDLIM1 PE=1 SV=2	tr|A0A5G2QRL2|A0A5G2QRL2_PIG	88388		-6.1	VAASIGNAQKLPMCDK	RT: 112.3
iNS15-R3-1_SW_RC3_01_8032	PDZ and LIM domain 1 OS=Sus scrofa OX=9823 GN=PDLIM1 PE=1 SV=2	tr|A0A5G2QRL2|A0A5G2QRL2_PIG	11989		-2.8	LPMCDKCGTGIVGVFVK	RT: 80.81
iNS7-R1-1_SW_RA8_01_8013	PDZ and LIM domain 1 OS=Sus scrofa OX=9823 GN=PDLIM1 PE=1 SV=2	tr|A0A5G2QRL2|A0A5G2QRL2_PIG	137579		-0.1	MTTQQIVLQGPGPWGFR	RT: 144.65
iNS7-R1-1_SW_RA8_01_8013	PDZ and LIM domain 1 OS=Sus scrofa OX=9823 GN=PDLIM1 PE=1 SV=2	tr|A0A5G2QRL2|A0A5G2QRL2_PIG	63422		-3.8	LVGGKDFEQPLAISR	RT: 67.5
iNS7-R1-1_SW_RA8_01_8013	PDZ and LIM domain 1 OS=Sus scrofa OX=9823 GN=PDLIM1 PE=1 SV=2	tr|A0A5G2QRL2|A0A5G2QRL2_PIG	129086		-4.7	LVGGKDFEQPLAISR	RT: 67.5
iNS7-R1-1_SW_RA8_01_8013	PDZ and LIM domain 1 OS=Sus scrofa OX=9823 GN=PDLIM1 PE=1 SV=2	tr|A0A5G2QRL2|A0A5G2QRL2_PIG	1327891		-8.4	IKGCTDNMTLTVAR	RT: 68.19
iNS7-R1-1_SW_RA8_01_8013	PDZ and LIM domain 1 OS=Sus scrofa OX=9823 GN=PDLIM1 PE=1 SV=2	tr|A0A5G2QRL2|A0A5G2QRL2_PIG	1930818		-5.9	GCTDNMTLTVAR	RT: 68.19
iNS7-R1-1_SW_RA8_01_8013	PDZ and LIM domain 1 OS=Sus scrofa OX=9823 GN=PDLIM1 PE=1 SV=2	tr|A0A5G2QRL2|A0A5G2QRL2_PIG	77064		-4.9	IWSPLVTEEGKR	RT: 27.99
iNS7-R1-1_SW_RA8_01_8013	PDZ and LIM domain 1 OS=Sus scrofa OX=9823 GN=PDLIM1 PE=1 SV=2	tr|A0A5G2QRL2|A0A5G2QRL2_PIG	1741160		-6.8	SAMPFTASPASSASPR	RT: 70.84
iNS7-R1-1_SW_RA8_01_8013	PDZ and LIM domain 1 OS=Sus scrofa OX=9823 GN=PDLIM1 PE=1 SV=2	tr|A0A5G2QRL2|A0A5G2QRL2_PIG	1769527		-6.5	SAMPFTASPASSASPR	RT: 70.84
iNS7-R1-1_SW_RA8_01_8013	PDZ and LIM domain 1 OS=Sus scrofa OX=9823 GN=PDLIM1 PE=1 SV=2	tr|A0A5G2QRL2|A0A5G2QRL2_PIG	240122		-3.2	SAMPFTASPASSASPR	RT: 32.87
iNS7-R1-1_SW_RA8_01_8013	PDZ and LIM domain 1 OS=Sus scrofa OX=9823 GN=PDLIM1 PE=1 SV=2	tr|A0A5G2QRL2|A0A5G2QRL2_PIG	40584		-3.5	IITNQYNNPAGLYSSENISSFNSALESK	RT: 111.56
iNS7-R1-1_SW_RA8_01_8013	PDZ and LIM domain 1 OS=Sus scrofa OX=9823 GN=PDLIM1 PE=1 SV=2	tr|A0A5G2QRL2|A0A5G2QRL2_PIG	438862		-4.3	TAASGQETNGR	RT: 34.47
iNS7-R1-1_SW_RA8_01_8013	PDZ and LIM domain 1 OS=Sus scrofa OX=9823 GN=PDLIM1 PE=1 SV=2	tr|A0A5G2QRL2|A0A5G2QRL2_PIG	28310		4.1	ALDHSQLPSGLVIDK	RT: 31.06
iNS7-R1-1_SW_RA8_01_8013	PDZ and LIM domain 1 OS=Sus scrofa OX=9823 GN=PDLIM1 PE=1 SV=2	tr|A0A5G2QRL2|A0A5G2QRL2_PIG	100111		0.6	ESEVYKMLQEK	RT: 52.9
iNS7-R1-1_SW_RA8_01_8013	PDZ and LIM domain 1 OS=Sus scrofa OX=9823 GN=PDLIM1 PE=1 SV=2	tr|A0A5G2QRL2|A0A5G2QRL2_PIG	273049		-5.7	MLQEKQELNEPPK	RT: 75.22
iNS7-R1-1_SW_RA8_01_8013	PDZ and LIM domain 1 OS=Sus scrofa OX=9823 GN=PDLIM1 PE=1 SV=2	tr|A0A5G2QRL2|A0A5G2QRL2_PIG	144115		-1	QELNEPPK	RT: 70.7
iNS7-R1-1_SW_RA8_01_8013	PDZ and LIM domain 1 OS=Sus scrofa OX=9823 GN=PDLIM1 PE=1 SV=2	tr|A0A5G2QRL2|A0A5G2QRL2_PIG	19494		1.8	VAASIGNAQK	RT: 30.98
iNS7-R1-1_SW_RA8_01_8013	PDZ and LIM domain 1 OS=Sus scrofa OX=9823 GN=PDLIM1 PE=1 SV=2	tr|A0A5G2QRL2|A0A5G2QRL2_PIG	175199		0.7	VAASIGNAQKLPMCDK	RT: 114.07
iNS7-R1-1_SW_RA8_01_8013	PDZ and LIM domain 1 OS=Sus scrofa OX=9823 GN=PDLIM1 PE=1 SV=2	tr|A0A5G2QRL2|A0A5G2QRL2_PIG	44631		2.5	LPMCDKCGTGIVGVFVK	RT: 82.52
iNS7-R2-1_SW_RB5_01_8019	PDZ and LIM domain 1 OS=Sus scrofa OX=9823 GN=PDLIM1 PE=1 SV=2	tr|A0A5G2QRL2|A0A5G2QRL2_PIG	8474		-3.4	MTTQQIVLQGPGPWGFR	RT: 142.08
iNS7-R2-1_SW_RB5_01_8019	PDZ and LIM domain 1 OS=Sus scrofa OX=9823 GN=PDLIM1 PE=1 SV=2	tr|A0A5G2QRL2|A0A5G2QRL2_PIG	8265		-4.6	LVGGKDFEQPLAISR	RT: 55.91
iNS7-R2-1_SW_RB5_01_8019	PDZ and LIM domain 1 OS=Sus scrofa OX=9823 GN=PDLIM1 PE=1 SV=2	tr|A0A5G2QRL2|A0A5G2QRL2_PIG	572071		-0.9	LVGGKDFEQPLAISR	RT: 55.91
iNS7-R2-1_SW_RB5_01_8019	PDZ and LIM domain 1 OS=Sus scrofa OX=9823 GN=PDLIM1 PE=1 SV=2	tr|A0A5G2QRL2|A0A5G2QRL2_PIG	331265		-2.9	IKGCTDNMTLTVAR	RT: 65.79
iNS7-R2-1_SW_RB5_01_8019	PDZ and LIM domain 1 OS=Sus scrofa OX=9823 GN=PDLIM1 PE=1 SV=2	tr|A0A5G2QRL2|A0A5G2QRL2_PIG	639654		-5.2	GCTDNMTLTVAR	RT: 53.06
iNS7-R2-1_SW_RB5_01_8019	PDZ and LIM domain 1 OS=Sus scrofa OX=9823 GN=PDLIM1 PE=1 SV=2	tr|A0A5G2QRL2|A0A5G2QRL2_PIG	63688		-4.6	IWSPLVTEEGKR	RT: 26.75
iNS7-R2-1_SW_RB5_01_8019	PDZ and LIM domain 1 OS=Sus scrofa OX=9823 GN=PDLIM1 PE=1 SV=2	tr|A0A5G2QRL2|A0A5G2QRL2_PIG	563711		-3.8	SAMPFTASPASSASPR	RT: 54.73
iNS7-R2-1_SW_RB5_01_8019	PDZ and LIM domain 1 OS=Sus scrofa OX=9823 GN=PDLIM1 PE=1 SV=2	tr|A0A5G2QRL2|A0A5G2QRL2_PIG	599336		-3.7	SAMPFTASPASSASPR	RT: 54.73
iNS7-R2-1_SW_RB5_01_8019	PDZ and LIM domain 1 OS=Sus scrofa OX=9823 GN=PDLIM1 PE=1 SV=2	tr|A0A5G2QRL2|A0A5G2QRL2_PIG	467818		-5.6	SAMPFTASPASSASPR	RT: 30.52
iNS7-R2-1_SW_RB5_01_8019	PDZ and LIM domain 1 OS=Sus scrofa OX=9823 GN=PDLIM1 PE=1 SV=2	tr|A0A5G2QRL2|A0A5G2QRL2_PIG	1292		-5.7	IITNQYNNPAGLYSSENISSFNSALESK	RT: 116.52
iNS7-R2-1_SW_RB5_01_8019	PDZ and LIM domain 1 OS=Sus scrofa OX=9823 GN=PDLIM1 PE=1 SV=2	tr|A0A5G2QRL2|A0A5G2QRL2_PIG	396758		-6.7	TAASGQETNGR	RT: 35.53
iNS7-R2-1_SW_RB5_01_8019	PDZ and LIM domain 1 OS=Sus scrofa OX=9823 GN=PDLIM1 PE=1 SV=2	tr|A0A5G2QRL2|A0A5G2QRL2_PIG	30324		-3.8	ALDHSQLPSGLVIDK	RT: 29.19
iNS7-R2-1_SW_RB5_01_8019	PDZ and LIM domain 1 OS=Sus scrofa OX=9823 GN=PDLIM1 PE=1 SV=2	tr|A0A5G2QRL2|A0A5G2QRL2_PIG	130321		-2.4	ESEVYKMLQEK	RT: 47.56
iNS7-R2-1_SW_RB5_01_8019	PDZ and LIM domain 1 OS=Sus scrofa OX=9823 GN=PDLIM1 PE=1 SV=2	tr|A0A5G2QRL2|A0A5G2QRL2_PIG	29887		-5	MLQEKQELNEPPK	RT: 73.72
iNS7-R2-1_SW_RB5_01_8019	PDZ and LIM domain 1 OS=Sus scrofa OX=9823 GN=PDLIM1 PE=1 SV=2	tr|A0A5G2QRL2|A0A5G2QRL2_PIG	175503		-5.6	QELNEPPK	RT: 55.84
iNS7-R2-1_SW_RB5_01_8019	PDZ and LIM domain 1 OS=Sus scrofa OX=9823 GN=PDLIM1 PE=1 SV=2	tr|A0A5G2QRL2|A0A5G2QRL2_PIG	36860		-2.3	VAASIGNAQK	RT: 33.37
iNS7-R2-1_SW_RB5_01_8019	PDZ and LIM domain 1 OS=Sus scrofa OX=9823 GN=PDLIM1 PE=1 SV=2	tr|A0A5G2QRL2|A0A5G2QRL2_PIG	3040		-5.2	VAASIGNAQKLPMCDK	RT: 114.27
iNS7-R2-1_SW_RB5_01_8019	PDZ and LIM domain 1 OS=Sus scrofa OX=9823 GN=PDLIM1 PE=1 SV=2	tr|A0A5G2QRL2|A0A5G2QRL2_PIG	63422		0.5	LPMCDKCGTGIVGVFVK	RT: 81.18
iNS7-R3-1_SW_RC5_01_8031	PDZ and LIM domain 1 OS=Sus scrofa OX=9823 GN=PDLIM1 PE=1 SV=2	tr|A0A5G2QRL2|A0A5G2QRL2_PIG	64049		1.5	MTTQQIVLQGPGPWGFR	RT: 138.84
iNS7-R3-1_SW_RC5_01_8031	PDZ and LIM domain 1 OS=Sus scrofa OX=9823 GN=PDLIM1 PE=1 SV=2	tr|A0A5G2QRL2|A0A5G2QRL2_PIG	41230		4.1	LVGGKDFEQPLAISR	RT: 61.66
iNS7-R3-1_SW_RC5_01_8031	PDZ and LIM domain 1 OS=Sus scrofa OX=9823 GN=PDLIM1 PE=1 SV=2	tr|A0A5G2QRL2|A0A5G2QRL2_PIG	48393		4.2	LVGGKDFEQPLAISR	RT: 61.66
iNS7-R3-1_SW_RC5_01_8031	PDZ and LIM domain 1 OS=Sus scrofa OX=9823 GN=PDLIM1 PE=1 SV=2	tr|A0A5G2QRL2|A0A5G2QRL2_PIG	73283		0	IKGCTDNMTLTVAR	RT: 66.21
iNS7-R3-1_SW_RC5_01_8031	PDZ and LIM domain 1 OS=Sus scrofa OX=9823 GN=PDLIM1 PE=1 SV=2	tr|A0A5G2QRL2|A0A5G2QRL2_PIG	206340		-7.3	GCTDNMTLTVAR	RT: 85.02
iNS7-R3-1_SW_RC5_01_8031	PDZ and LIM domain 1 OS=Sus scrofa OX=9823 GN=PDLIM1 PE=1 SV=2	tr|A0A5G2QRL2|A0A5G2QRL2_PIG	35872		0	IWSPLVTEEGKR	RT: 24.17
iNS7-R3-1_SW_RC5_01_8031	PDZ and LIM domain 1 OS=Sus scrofa OX=9823 GN=PDLIM1 PE=1 SV=2	tr|A0A5G2QRL2|A0A5G2QRL2_PIG	82669		-1	SAMPFTASPASSASPR	RT: 71.19
iNS7-R3-1_SW_RC5_01_8031	PDZ and LIM domain 1 OS=Sus scrofa OX=9823 GN=PDLIM1 PE=1 SV=2	tr|A0A5G2QRL2|A0A5G2QRL2_PIG	89889		-1.6	SAMPFTASPASSASPR	RT: 71.19
iNS7-R3-1_SW_RC5_01_8031	PDZ and LIM domain 1 OS=Sus scrofa OX=9823 GN=PDLIM1 PE=1 SV=2	tr|A0A5G2QRL2|A0A5G2QRL2_PIG	76437		-9	SAMPFTASPASSASPR	RT: 27.02
iNS7-R3-1_SW_RC5_01_8031	PDZ and LIM domain 1 OS=Sus scrofa OX=9823 GN=PDLIM1 PE=1 SV=2	tr|A0A5G2QRL2|A0A5G2QRL2_PIG	20349		0.3	IITNQYNNPAGLYSSENISSFNSALESK	RT: 115.42
iNS7-R3-1_SW_RC5_01_8031	PDZ and LIM domain 1 OS=Sus scrofa OX=9823 GN=PDLIM1 PE=1 SV=2	tr|A0A5G2QRL2|A0A5G2QRL2_PIG	28462		-5.6	TAASGQETNGR	RT: 34.75
iNS7-R3-1_SW_RC5_01_8031	PDZ and LIM domain 1 OS=Sus scrofa OX=9823 GN=PDLIM1 PE=1 SV=2	tr|A0A5G2QRL2|A0A5G2QRL2_PIG	20235		-2	ALDHSQLPSGLVIDK	RT: 25.07
iNS7-R3-1_SW_RC5_01_8031	PDZ and LIM domain 1 OS=Sus scrofa OX=9823 GN=PDLIM1 PE=1 SV=2	tr|A0A5G2QRL2|A0A5G2QRL2_PIG	73435		-6.4	ESEVYKMLQEK	RT: 49.84
iNS7-R3-1_SW_RC5_01_8031	PDZ and LIM domain 1 OS=Sus scrofa OX=9823 GN=PDLIM1 PE=1 SV=2	tr|A0A5G2QRL2|A0A5G2QRL2_PIG	24415		2.6	MLQEKQELNEPPK	RT: 72.03
iNS7-R3-1_SW_RC5_01_8031	PDZ and LIM domain 1 OS=Sus scrofa OX=9823 GN=PDLIM1 PE=1 SV=2	tr|A0A5G2QRL2|A0A5G2QRL2_PIG	522766		9	QELNEPPK	RT: 86.78
iNS7-R3-1_SW_RC5_01_8031	PDZ and LIM domain 1 OS=Sus scrofa OX=9823 GN=PDLIM1 PE=1 SV=2	tr|A0A5G2QRL2|A0A5G2QRL2_PIG	18905		4.2	VAASIGNAQK	RT: 30.43
iNS7-R3-1_SW_RC5_01_8031	PDZ and LIM domain 1 OS=Sus scrofa OX=9823 GN=PDLIM1 PE=1 SV=2	tr|A0A5G2QRL2|A0A5G2QRL2_PIG	41420		-0.1	VAASIGNAQKLPMCDK	RT: 114.16
iNS7-R3-1_SW_RC5_01_8031	PDZ and LIM domain 1 OS=Sus scrofa OX=9823 GN=PDLIM1 PE=1 SV=2	tr|A0A5G2QRL2|A0A5G2QRL2_PIG	42465		4.9	LPMCDKCGTGIVGVFVK	RT: 77.53
PEF-R1-1_SW_RA7_01_8012	PDZ and LIM domain 1 OS=Sus scrofa OX=9823 GN=PDLIM1 PE=1 SV=2	tr|A0A5G2QRL2|A0A5G2QRL2_PIG	76646		-4.9	MTTQQIVLQGPGPWGFR	RT: 145.45
PEF-R1-1_SW_RA7_01_8012	PDZ and LIM domain 1 OS=Sus scrofa OX=9823 GN=PDLIM1 PE=1 SV=2	tr|A0A5G2QRL2|A0A5G2QRL2_PIG	55936		5.6	LVGGKDFEQPLAISR	RT: 44.42
PEF-R1-1_SW_RA7_01_8012	PDZ and LIM domain 1 OS=Sus scrofa OX=9823 GN=PDLIM1 PE=1 SV=2	tr|A0A5G2QRL2|A0A5G2QRL2_PIG	159942		2.6	LVGGKDFEQPLAISR	RT: 44.42
PEF-R1-1_SW_RA7_01_8012	PDZ and LIM domain 1 OS=Sus scrofa OX=9823 GN=PDLIM1 PE=1 SV=2	tr|A0A5G2QRL2|A0A5G2QRL2_PIG	95437		-4.9	IKGCTDNMTLTVAR	RT: 69.27
PEF-R1-1_SW_RA7_01_8012	PDZ and LIM domain 1 OS=Sus scrofa OX=9823 GN=PDLIM1 PE=1 SV=2	tr|A0A5G2QRL2|A0A5G2QRL2_PIG	2128095		-5.8	GCTDNMTLTVAR	RT: 93.73
PEF-R1-1_SW_RA7_01_8012	PDZ and LIM domain 1 OS=Sus scrofa OX=9823 GN=PDLIM1 PE=1 SV=2	tr|A0A5G2QRL2|A0A5G2QRL2_PIG	54359		-2.2	IWSPLVTEEGKR	RT: 27.39
PEF-R1-1_SW_RA7_01_8012	PDZ and LIM domain 1 OS=Sus scrofa OX=9823 GN=PDLIM1 PE=1 SV=2	tr|A0A5G2QRL2|A0A5G2QRL2_PIG	379620		-7.1	SAMPFTASPASSASPR	RT: 70.43
PEF-R1-1_SW_RA7_01_8012	PDZ and LIM domain 1 OS=Sus scrofa OX=9823 GN=PDLIM1 PE=1 SV=2	tr|A0A5G2QRL2|A0A5G2QRL2_PIG	387448		-6.9	SAMPFTASPASSASPR	RT: 70.43
PEF-R1-1_SW_RA7_01_8012	PDZ and LIM domain 1 OS=Sus scrofa OX=9823 GN=PDLIM1 PE=1 SV=2	tr|A0A5G2QRL2|A0A5G2QRL2_PIG	168720		-6.1	SAMPFTASPASSASPR	RT: 30.78
PEF-R1-1_SW_RA7_01_8012	PDZ and LIM domain 1 OS=Sus scrofa OX=9823 GN=PDLIM1 PE=1 SV=2	tr|A0A5G2QRL2|A0A5G2QRL2_PIG	36860		-3	IITNQYNNPAGLYSSENISSFNSALESK	RT: 113.4
PEF-R1-1_SW_RA7_01_8012	PDZ and LIM domain 1 OS=Sus scrofa OX=9823 GN=PDLIM1 PE=1 SV=2	tr|A0A5G2QRL2|A0A5G2QRL2_PIG	133608		3.5	TAASGQETNGR	RT: 33.22
PEF-R1-1_SW_RA7_01_8012	PDZ and LIM domain 1 OS=Sus scrofa OX=9823 GN=PDLIM1 PE=1 SV=2	tr|A0A5G2QRL2|A0A5G2QRL2_PIG	29868		-0.3	ALDHSQLPSGLVIDK	RT: 30.99
PEF-R1-1_SW_RA7_01_8012	PDZ and LIM domain 1 OS=Sus scrofa OX=9823 GN=PDLIM1 PE=1 SV=2	tr|A0A5G2QRL2|A0A5G2QRL2_PIG	121144		3	ESEVYKMLQEK	RT: 48.24
PEF-R1-1_SW_RA7_01_8012	PDZ and LIM domain 1 OS=Sus scrofa OX=9823 GN=PDLIM1 PE=1 SV=2	tr|A0A5G2QRL2|A0A5G2QRL2_PIG	48165		4.4	MLQEKQELNEPPK	RT: 74.25
PEF-R1-1_SW_RA7_01_8012	PDZ and LIM domain 1 OS=Sus scrofa OX=9823 GN=PDLIM1 PE=1 SV=2	tr|A0A5G2QRL2|A0A5G2QRL2_PIG	243884		5	QELNEPPK	RT: 93.59
PEF-R1-1_SW_RA7_01_8012	PDZ and LIM domain 1 OS=Sus scrofa OX=9823 GN=PDLIM1 PE=1 SV=2	tr|A0A5G2QRL2|A0A5G2QRL2_PIG	14364		-7.2	VAASIGNAQK	RT: 31.06
PEF-R1-1_SW_RA7_01_8012	PDZ and LIM domain 1 OS=Sus scrofa OX=9823 GN=PDLIM1 PE=1 SV=2	tr|A0A5G2QRL2|A0A5G2QRL2_PIG	158859		-0.1	VAASIGNAQKLPMCDK	RT: 111.81
PEF-R1-1_SW_RA7_01_8012	PDZ and LIM domain 1 OS=Sus scrofa OX=9823 GN=PDLIM1 PE=1 SV=2	tr|A0A5G2QRL2|A0A5G2QRL2_PIG	23180		-5	LPMCDKCGTGIVGVFVK	RT: 82.95
PEF-R2-1_SW_RB4_01_8018	PDZ and LIM domain 1 OS=Sus scrofa OX=9823 GN=PDLIM1 PE=1 SV=2	tr|A0A5G2QRL2|A0A5G2QRL2_PIG	1653		-4.1	MTTQQIVLQGPGPWGFR	RT: 143.7
PEF-R2-1_SW_RB4_01_8018	PDZ and LIM domain 1 OS=Sus scrofa OX=9823 GN=PDLIM1 PE=1 SV=2	tr|A0A5G2QRL2|A0A5G2QRL2_PIG	1824		-1.7	LVGGKDFEQPLAISR	RT: 52.6
PEF-R2-1_SW_RB4_01_8018	PDZ and LIM domain 1 OS=Sus scrofa OX=9823 GN=PDLIM1 PE=1 SV=2	tr|A0A5G2QRL2|A0A5G2QRL2_PIG	39292		-5.3	LVGGKDFEQPLAISR	RT: 52.6
PEF-R2-1_SW_RB4_01_8018	PDZ and LIM domain 1 OS=Sus scrofa OX=9823 GN=PDLIM1 PE=1 SV=2	tr|A0A5G2QRL2|A0A5G2QRL2_PIG	2926		-4.3	IKGCTDNMTLTVAR	RT: 66.36
PEF-R2-1_SW_RB4_01_8018	PDZ and LIM domain 1 OS=Sus scrofa OX=9823 GN=PDLIM1 PE=1 SV=2	tr|A0A5G2QRL2|A0A5G2QRL2_PIG	3564300		-2.3	GCTDNMTLTVAR	RT: 85.28
PEF-R2-1_SW_RB4_01_8018	PDZ and LIM domain 1 OS=Sus scrofa OX=9823 GN=PDLIM1 PE=1 SV=2	tr|A0A5G2QRL2|A0A5G2QRL2_PIG	2375		-1.3	IWSPLVTEEGKR	RT: 27.33
PEF-R2-1_SW_RB4_01_8018	PDZ and LIM domain 1 OS=Sus scrofa OX=9823 GN=PDLIM1 PE=1 SV=2	tr|A0A5G2QRL2|A0A5G2QRL2_PIG	322563		-3.1	SAMPFTASPASSASPR	RT: 51.88
PEF-R2-1_SW_RB4_01_8018	PDZ and LIM domain 1 OS=Sus scrofa OX=9823 GN=PDLIM1 PE=1 SV=2	tr|A0A5G2QRL2|A0A5G2QRL2_PIG	338770		-2.8	SAMPFTASPASSASPR	RT: 51.88
PEF-R2-1_SW_RB4_01_8018	PDZ and LIM domain 1 OS=Sus scrofa OX=9823 GN=PDLIM1 PE=1 SV=2	tr|A0A5G2QRL2|A0A5G2QRL2_PIG	61978		0.2	SAMPFTASPASSASPR	RT: 29.68
PEF-R2-1_SW_RB4_01_8018	PDZ and LIM domain 1 OS=Sus scrofa OX=9823 GN=PDLIM1 PE=1 SV=2	tr|A0A5G2QRL2|A0A5G2QRL2_PIG	1292		5.2	IITNQYNNPAGLYSSENISSFNSALESK	RT: 111.99
PEF-R2-1_SW_RB4_01_8018	PDZ and LIM domain 1 OS=Sus scrofa OX=9823 GN=PDLIM1 PE=1 SV=2	tr|A0A5G2QRL2|A0A5G2QRL2_PIG	43244		-2.7	TAASGQETNGR	RT: 33.17
PEF-R2-1_SW_RB4_01_8018	PDZ and LIM domain 1 OS=Sus scrofa OX=9823 GN=PDLIM1 PE=1 SV=2	tr|A0A5G2QRL2|A0A5G2QRL2_PIG	2793		3	ALDHSQLPSGLVIDK	RT: 29.9
PEF-R2-1_SW_RB4_01_8018	PDZ and LIM domain 1 OS=Sus scrofa OX=9823 GN=PDLIM1 PE=1 SV=2	tr|A0A5G2QRL2|A0A5G2QRL2_PIG	9177		-5.8	ESEVYKMLQEK	RT: 49.25
PEF-R2-1_SW_RB4_01_8018	PDZ and LIM domain 1 OS=Sus scrofa OX=9823 GN=PDLIM1 PE=1 SV=2	tr|A0A5G2QRL2|A0A5G2QRL2_PIG	988		3.2	MLQEKQELNEPPK	RT: 72.22
PEF-R2-1_SW_RB4_01_8018	PDZ and LIM domain 1 OS=Sus scrofa OX=9823 GN=PDLIM1 PE=1 SV=2	tr|A0A5G2QRL2|A0A5G2QRL2_PIG	32794		2.7	QELNEPPK	RT: 92.47
PEF-R2-1_SW_RB4_01_8018	PDZ and LIM domain 1 OS=Sus scrofa OX=9823 GN=PDLIM1 PE=1 SV=2	tr|A0A5G2QRL2|A0A5G2QRL2_PIG	5301		-0.4	VAASIGNAQK	RT: 31.29
PEF-R2-1_SW_RB4_01_8018	PDZ and LIM domain 1 OS=Sus scrofa OX=9823 GN=PDLIM1 PE=1 SV=2	tr|A0A5G2QRL2|A0A5G2QRL2_PIG	4503		-1.1	VAASIGNAQKLPMCDK	RT: 112.83
PEF-R2-1_SW_RB4_01_8018	PDZ and LIM domain 1 OS=Sus scrofa OX=9823 GN=PDLIM1 PE=1 SV=2	tr|A0A5G2QRL2|A0A5G2QRL2_PIG	3078		-0.5	LPMCDKCGTGIVGVFVK	RT: 79.52
PEF-R3-1_SW_RC1_01_8030	PDZ and LIM domain 1 OS=Sus scrofa OX=9823 GN=PDLIM1 PE=1 SV=2	tr|A0A5G2QRL2|A0A5G2QRL2_PIG	330391		-1.6	MTTQQIVLQGPGPWGFR	RT: 141.84
PEF-R3-1_SW_RC1_01_8030	PDZ and LIM domain 1 OS=Sus scrofa OX=9823 GN=PDLIM1 PE=1 SV=2	tr|A0A5G2QRL2|A0A5G2QRL2_PIG	14535		-2.5	LVGGKDFEQPLAISR	RT: 68.32
PEF-R3-1_SW_RC1_01_8030	PDZ and LIM domain 1 OS=Sus scrofa OX=9823 GN=PDLIM1 PE=1 SV=2	tr|A0A5G2QRL2|A0A5G2QRL2_PIG	2734480		0	LVGGKDFEQPLAISR	RT: 68.32
PEF-R3-1_SW_RC1_01_8030	PDZ and LIM domain 1 OS=Sus scrofa OX=9823 GN=PDLIM1 PE=1 SV=2	tr|A0A5G2QRL2|A0A5G2QRL2_PIG	2202119		1.3	IKGCTDNMTLTVAR	RT: 68.1
PEF-R3-1_SW_RC1_01_8030	PDZ and LIM domain 1 OS=Sus scrofa OX=9823 GN=PDLIM1 PE=1 SV=2	tr|A0A5G2QRL2|A0A5G2QRL2_PIG	3961785		1.6	GCTDNMTLTVAR	RT: 68.24
PEF-R3-1_SW_RC1_01_8030	PDZ and LIM domain 1 OS=Sus scrofa OX=9823 GN=PDLIM1 PE=1 SV=2	tr|A0A5G2QRL2|A0A5G2QRL2_PIG	95361		-2.2	IWSPLVTEEGKR	RT: 26.38
PEF-R3-1_SW_RC1_01_8030	PDZ and LIM domain 1 OS=Sus scrofa OX=9823 GN=PDLIM1 PE=1 SV=2	tr|A0A5G2QRL2|A0A5G2QRL2_PIG	2332022		0.2	SAMPFTASPASSASPR	RT: 68.79
PEF-R3-1_SW_RC1_01_8030	PDZ and LIM domain 1 OS=Sus scrofa OX=9823 GN=PDLIM1 PE=1 SV=2	tr|A0A5G2QRL2|A0A5G2QRL2_PIG	2356988		0.2	SAMPFTASPASSASPR	RT: 68.79
PEF-R3-1_SW_RC1_01_8030	PDZ and LIM domain 1 OS=Sus scrofa OX=9823 GN=PDLIM1 PE=1 SV=2	tr|A0A5G2QRL2|A0A5G2QRL2_PIG	220267		-4.6	SAMPFTASPASSASPR	RT: 30.77
PEF-R3-1_SW_RC1_01_8030	PDZ and LIM domain 1 OS=Sus scrofa OX=9823 GN=PDLIM1 PE=1 SV=2	tr|A0A5G2QRL2|A0A5G2QRL2_PIG	13547		-1.2	IITNQYNNPAGLYSSENISSFNSALESK	RT: 114.31
PEF-R3-1_SW_RC1_01_8030	PDZ and LIM domain 1 OS=Sus scrofa OX=9823 GN=PDLIM1 PE=1 SV=2	tr|A0A5G2QRL2|A0A5G2QRL2_PIG	312930		-3.2	TAASGQETNGR	RT: 37.37
PEF-R3-1_SW_RC1_01_8030	PDZ and LIM domain 1 OS=Sus scrofa OX=9823 GN=PDLIM1 PE=1 SV=2	tr|A0A5G2QRL2|A0A5G2QRL2_PIG	30647		-0.1	ALDHSQLPSGLVIDK	RT: 30.01
PEF-R3-1_SW_RC1_01_8030	PDZ and LIM domain 1 OS=Sus scrofa OX=9823 GN=PDLIM1 PE=1 SV=2	tr|A0A5G2QRL2|A0A5G2QRL2_PIG	359670		-3.3	ESEVYKMLQEK	RT: 45.99
PEF-R3-1_SW_RC1_01_8030	PDZ and LIM domain 1 OS=Sus scrofa OX=9823 GN=PDLIM1 PE=1 SV=2	tr|A0A5G2QRL2|A0A5G2QRL2_PIG	649211		-5.3	MLQEKQELNEPPK	RT: 73.32
PEF-R3-1_SW_RC1_01_8030	PDZ and LIM domain 1 OS=Sus scrofa OX=9823 GN=PDLIM1 PE=1 SV=2	tr|A0A5G2QRL2|A0A5G2QRL2_PIG	711265		-7.3	QELNEPPK	RT: 82.9
PEF-R3-1_SW_RC1_01_8030	PDZ and LIM domain 1 OS=Sus scrofa OX=9823 GN=PDLIM1 PE=1 SV=2	tr|A0A5G2QRL2|A0A5G2QRL2_PIG	26220		-2.4	VAASIGNAQK	RT: 33.55
PEF-R3-1_SW_RC1_01_8030	PDZ and LIM domain 1 OS=Sus scrofa OX=9823 GN=PDLIM1 PE=1 SV=2	tr|A0A5G2QRL2|A0A5G2QRL2_PIG	34770		-1.9	VAASIGNAQKLPMCDK	RT: 112.52
PEF-R3-1_SW_RC1_01_8030	PDZ and LIM domain 1 OS=Sus scrofa OX=9823 GN=PDLIM1 PE=1 SV=2	tr|A0A5G2QRL2|A0A5G2QRL2_PIG	26904		1.6	LPMCDKCGTGIVGVFVK	RT: 82.77

## Sheet: A0A5G2R0H0
Replicate	Protein Description	Protein Name	Total Area		Average Mass Error PPM	Peptide Sequence	Peptide Result
iNS15-R1-1_SW_RB1_01_8014	Electron transfer flavoprotein subunit beta OS=Sus scrofa OX=9823 GN=ETFB PE=1 SV=1	tr|A0A5G2R0H0|A0A5G2R0H0_PIG	25840		-3.7	MAELRALVAVK	RT: 42.18
iNS15-R1-1_SW_RB1_01_8014	Electron transfer flavoprotein subunit beta OS=Sus scrofa OX=9823 GN=ETFB PE=1 SV=1	tr|A0A5G2R0H0|A0A5G2R0H0_PIG	130853		3.2	MAELRALVAVK	RT: 55.82
iNS15-R1-1_SW_RB1_01_8014	Electron transfer flavoprotein subunit beta OS=Sus scrofa OX=9823 GN=ETFB PE=1 SV=1	tr|A0A5G2R0H0|A0A5G2R0H0_PIG	1463437		-7.5	VIDFAVKIR	RT: 64.5
iNS15-R1-1_SW_RB1_01_8014	Electron transfer flavoprotein subunit beta OS=Sus scrofa OX=9823 GN=ETFB PE=1 SV=1	tr|A0A5G2R0H0|A0A5G2R0H0_PIG	988494		-5.5	IRVKPDR	RT: 61.03
iNS15-R1-1_SW_RB1_01_8014	Electron transfer flavoprotein subunit beta OS=Sus scrofa OX=9823 GN=ETFB PE=1 SV=1	tr|A0A5G2R0H0|A0A5G2R0H0_PIG	190304		1.5	TGVVMDGVK	RT: 74.51
iNS15-R1-1_SW_RB1_01_8014	Electron transfer flavoprotein subunit beta OS=Sus scrofa OX=9823 GN=ETFB PE=1 SV=1	tr|A0A5G2R0H0|A0A5G2R0H0_PIG	175332		-8.8	TGVVMDGVK	RT: 58.8
iNS15-R1-1_SW_RB1_01_8014	Electron transfer flavoprotein subunit beta OS=Sus scrofa OX=9823 GN=ETFB PE=1 SV=1	tr|A0A5G2R0H0|A0A5G2R0H0_PIG	55081		-1.3	HSMNPFCEIAVEEAVR	RT: 93.64
iNS15-R1-1_SW_RB1_01_8014	Electron transfer flavoprotein subunit beta OS=Sus scrofa OX=9823 GN=ETFB PE=1 SV=1	tr|A0A5G2R0H0|A0A5G2R0H0_PIG	1156321		-2.9	EVIAVSCGPAQCQETIR	RT: 74.17
iNS15-R1-1_SW_RB1_01_8014	Electron transfer flavoprotein subunit beta OS=Sus scrofa OX=9823 GN=ETFB PE=1 SV=1	tr|A0A5G2R0H0|A0A5G2R0H0_PIG	2128152		-7.9	TALAMGADR	RT: 64.44
iNS15-R1-1_SW_RB1_01_8014	Electron transfer flavoprotein subunit beta OS=Sus scrofa OX=9823 GN=ETFB PE=1 SV=1	tr|A0A5G2R0H0|A0A5G2R0H0_PIG	2517139		-4.6	TALAMGADR	RT: 17.7
iNS15-R1-1_SW_RB1_01_8014	Electron transfer flavoprotein subunit beta OS=Sus scrofa OX=9823 GN=ETFB PE=1 SV=1	tr|A0A5G2R0H0|A0A5G2R0H0_PIG	115444		-7.5	VLAKLAQK	RT: 57.01
iNS15-R1-1_SW_RB1_01_8014	Electron transfer flavoprotein subunit beta OS=Sus scrofa OX=9823 GN=ETFB PE=1 SV=1	tr|A0A5G2R0H0|A0A5G2R0H0_PIG	243922		-6.4	VDLVLLGK	RT: 58.8
iNS15-R1-1_SW_RB1_01_8014	Electron transfer flavoprotein subunit beta OS=Sus scrofa OX=9823 GN=ETFB PE=1 SV=1	tr|A0A5G2R0H0|A0A5G2R0H0_PIG	98610		1.3	VDLVLLGKQGTFASQVTLEGDK	RT: 102.88
iNS15-R1-1_SW_RB1_01_8014	Electron transfer flavoprotein subunit beta OS=Sus scrofa OX=9823 GN=ETFB PE=1 SV=1	tr|A0A5G2R0H0|A0A5G2R0H0_PIG	233852		-0.7	QGTFASQVTLEGDK	RT: 68.26
iNS15-R1-1_SW_RB1_01_8014	Electron transfer flavoprotein subunit beta OS=Sus scrofa OX=9823 GN=ETFB PE=1 SV=1	tr|A0A5G2R0H0|A0A5G2R0H0_PIG	117895		-3.3	VEREIDGGLETLR	RT: 95.38
iNS15-R1-1_SW_RB1_01_8014	Electron transfer flavoprotein subunit beta OS=Sus scrofa OX=9823 GN=ETFB PE=1 SV=1	tr|A0A5G2R0H0|A0A5G2R0H0_PIG	1151837		-5.7	EIDGGLETLR	RT: 69.09
iNS15-R1-1_SW_RB1_01_8014	Electron transfer flavoprotein subunit beta OS=Sus scrofa OX=9823 GN=ETFB PE=1 SV=1	tr|A0A5G2R0H0|A0A5G2R0H0_PIG	1583783		-5.9	LKLPAVVTADLR	RT: 64.37
iNS15-R1-1_SW_RB1_01_8014	Electron transfer flavoprotein subunit beta OS=Sus scrofa OX=9823 GN=ETFB PE=1 SV=1	tr|A0A5G2R0H0|A0A5G2R0H0_PIG	1572801		-5.6	LPAVVTADLRLNEPR	RT: 68.4
iNS15-R1-1_SW_RB1_01_8014	Electron transfer flavoprotein subunit beta OS=Sus scrofa OX=9823 GN=ETFB PE=1 SV=1	tr|A0A5G2R0H0|A0A5G2R0H0_PIG	1554105		-5.6	LPAVVTADLRLNEPR	RT: 68.4
iNS15-R1-1_SW_RB1_01_8014	Electron transfer flavoprotein subunit beta OS=Sus scrofa OX=9823 GN=ETFB PE=1 SV=1	tr|A0A5G2R0H0|A0A5G2R0H0_PIG	165148		-4.3	AGDLGVDLTSK	RT: 68.2
iNS15-R1-1_SW_RB1_01_8014	Electron transfer flavoprotein subunit beta OS=Sus scrofa OX=9823 GN=ETFB PE=1 SV=1	tr|A0A5G2R0H0|A0A5G2R0H0_PIG	1601776		-4.3	LSVVSVEDPPQR	RT: 73.69
iNS15-R1-1_SW_RB1_01_8014	Electron transfer flavoprotein subunit beta OS=Sus scrofa OX=9823 GN=ETFB PE=1 SV=1	tr|A0A5G2R0H0|A0A5G2R0H0_PIG	1390002		-3.4	LSVVSVEDPPQR	RT: 73.69
iNS15-R1-1_SW_RB1_01_8014	Electron transfer flavoprotein subunit beta OS=Sus scrofa OX=9823 GN=ETFB PE=1 SV=1	tr|A0A5G2R0H0|A0A5G2R0H0_PIG	641098		-2.6	VAGVKVETTEDLVAK	RT: 64.16
iNS15-R2-1_SW_RB6_01_8020	Electron transfer flavoprotein subunit beta OS=Sus scrofa OX=9823 GN=ETFB PE=1 SV=1	tr|A0A5G2R0H0|A0A5G2R0H0_PIG	26562		-3.3	MAELRALVAVK	RT: 40.81
iNS15-R2-1_SW_RB6_01_8020	Electron transfer flavoprotein subunit beta OS=Sus scrofa OX=9823 GN=ETFB PE=1 SV=1	tr|A0A5G2R0H0|A0A5G2R0H0_PIG	114285		1.9	MAELRALVAVK	RT: 49.58
iNS15-R2-1_SW_RB6_01_8020	Electron transfer flavoprotein subunit beta OS=Sus scrofa OX=9823 GN=ETFB PE=1 SV=1	tr|A0A5G2R0H0|A0A5G2R0H0_PIG	566067		-4.3	VIDFAVKIR	RT: 52.08
iNS15-R2-1_SW_RB6_01_8020	Electron transfer flavoprotein subunit beta OS=Sus scrofa OX=9823 GN=ETFB PE=1 SV=1	tr|A0A5G2R0H0|A0A5G2R0H0_PIG	375953		-5.9	IRVKPDR	RT: 62.38
iNS15-R2-1_SW_RB6_01_8020	Electron transfer flavoprotein subunit beta OS=Sus scrofa OX=9823 GN=ETFB PE=1 SV=1	tr|A0A5G2R0H0|A0A5G2R0H0_PIG	100092		-1.3	TGVVMDGVK	RT: 71.97
iNS15-R2-1_SW_RB6_01_8020	Electron transfer flavoprotein subunit beta OS=Sus scrofa OX=9823 GN=ETFB PE=1 SV=1	tr|A0A5G2R0H0|A0A5G2R0H0_PIG	124697		-5	TGVVMDGVK	RT: 56.76
iNS15-R2-1_SW_RB6_01_8020	Electron transfer flavoprotein subunit beta OS=Sus scrofa OX=9823 GN=ETFB PE=1 SV=1	tr|A0A5G2R0H0|A0A5G2R0H0_PIG	22534		3.7	HSMNPFCEIAVEEAVR	RT: 90.34
iNS15-R2-1_SW_RB6_01_8020	Electron transfer flavoprotein subunit beta OS=Sus scrofa OX=9823 GN=ETFB PE=1 SV=1	tr|A0A5G2R0H0|A0A5G2R0H0_PIG	371393		-8.3	EVIAVSCGPAQCQETIR	RT: 73.5
iNS15-R2-1_SW_RB6_01_8020	Electron transfer flavoprotein subunit beta OS=Sus scrofa OX=9823 GN=ETFB PE=1 SV=1	tr|A0A5G2R0H0|A0A5G2R0H0_PIG	567777		-7.3	TALAMGADR	RT: 49.86
iNS15-R2-1_SW_RB6_01_8020	Electron transfer flavoprotein subunit beta OS=Sus scrofa OX=9823 GN=ETFB PE=1 SV=1	tr|A0A5G2R0H0|A0A5G2R0H0_PIG	2335119		-4.4	TALAMGADR	RT: 17.63
iNS15-R2-1_SW_RB6_01_8020	Electron transfer flavoprotein subunit beta OS=Sus scrofa OX=9823 GN=ETFB PE=1 SV=1	tr|A0A5G2R0H0|A0A5G2R0H0_PIG	32243		4.2	VLAKLAQK	RT: 62.59
iNS15-R2-1_SW_RB6_01_8020	Electron transfer flavoprotein subunit beta OS=Sus scrofa OX=9823 GN=ETFB PE=1 SV=1	tr|A0A5G2R0H0|A0A5G2R0H0_PIG	66747		1.7	VDLVLLGK	RT: 64.74
iNS15-R2-1_SW_RB6_01_8020	Electron transfer flavoprotein subunit beta OS=Sus scrofa OX=9823 GN=ETFB PE=1 SV=1	tr|A0A5G2R0H0|A0A5G2R0H0_PIG	4845		1.8	VDLVLLGKQGTFASQVTLEGDK	RT: 99.52
iNS15-R2-1_SW_RB6_01_8020	Electron transfer flavoprotein subunit beta OS=Sus scrofa OX=9823 GN=ETFB PE=1 SV=1	tr|A0A5G2R0H0|A0A5G2R0H0_PIG	297635		7.6	QGTFASQVTLEGDK	RT: 71.01
iNS15-R2-1_SW_RB6_01_8020	Electron transfer flavoprotein subunit beta OS=Sus scrofa OX=9823 GN=ETFB PE=1 SV=1	tr|A0A5G2R0H0|A0A5G2R0H0_PIG	27911		-2.6	VEREIDGGLETLR	RT: 93.75
iNS15-R2-1_SW_RB6_01_8020	Electron transfer flavoprotein subunit beta OS=Sus scrofa OX=9823 GN=ETFB PE=1 SV=1	tr|A0A5G2R0H0|A0A5G2R0H0_PIG	290472		-4.2	EIDGGLETLR	RT: 76.08
iNS15-R2-1_SW_RB6_01_8020	Electron transfer flavoprotein subunit beta OS=Sus scrofa OX=9823 GN=ETFB PE=1 SV=1	tr|A0A5G2R0H0|A0A5G2R0H0_PIG	1562237		-7.3	LKLPAVVTADLR	RT: 52.86
iNS15-R2-1_SW_RB6_01_8020	Electron transfer flavoprotein subunit beta OS=Sus scrofa OX=9823 GN=ETFB PE=1 SV=1	tr|A0A5G2R0H0|A0A5G2R0H0_PIG	732849		-6.6	LPAVVTADLRLNEPR	RT: 52.87
iNS15-R2-1_SW_RB6_01_8020	Electron transfer flavoprotein subunit beta OS=Sus scrofa OX=9823 GN=ETFB PE=1 SV=1	tr|A0A5G2R0H0|A0A5G2R0H0_PIG	735072		-6.7	LPAVVTADLRLNEPR	RT: 52.87
iNS15-R2-1_SW_RB6_01_8020	Electron transfer flavoprotein subunit beta OS=Sus scrofa OX=9823 GN=ETFB PE=1 SV=1	tr|A0A5G2R0H0|A0A5G2R0H0_PIG	40641		0.7	AGDLGVDLTSK	RT: 66.34
iNS15-R2-1_SW_RB6_01_8020	Electron transfer flavoprotein subunit beta OS=Sus scrofa OX=9823 GN=ETFB PE=1 SV=1	tr|A0A5G2R0H0|A0A5G2R0H0_PIG	542127		-1.8	LSVVSVEDPPQR	RT: 55.91
iNS15-R2-1_SW_RB6_01_8020	Electron transfer flavoprotein subunit beta OS=Sus scrofa OX=9823 GN=ETFB PE=1 SV=1	tr|A0A5G2R0H0|A0A5G2R0H0_PIG	609235		-2	LSVVSVEDPPQR	RT: 55.91
iNS15-R2-1_SW_RB6_01_8020	Electron transfer flavoprotein subunit beta OS=Sus scrofa OX=9823 GN=ETFB PE=1 SV=1	tr|A0A5G2R0H0|A0A5G2R0H0_PIG	97128		-5.4	VAGVKVETTEDLVAK	RT: 63.98
iNS15-R3-1_SW_RC3_01_8032	Electron transfer flavoprotein subunit beta OS=Sus scrofa OX=9823 GN=ETFB PE=1 SV=1	tr|A0A5G2R0H0|A0A5G2R0H0_PIG	14288		2.1	MAELRALVAVK	RT: 39.2
iNS15-R3-1_SW_RC3_01_8032	Electron transfer flavoprotein subunit beta OS=Sus scrofa OX=9823 GN=ETFB PE=1 SV=1	tr|A0A5G2R0H0|A0A5G2R0H0_PIG	95342		-5.7	MAELRALVAVK	RT: 52.63
iNS15-R3-1_SW_RC3_01_8032	Electron transfer flavoprotein subunit beta OS=Sus scrofa OX=9823 GN=ETFB PE=1 SV=1	tr|A0A5G2R0H0|A0A5G2R0H0_PIG	96368		-5.9	VIDFAVKIR	RT: 58.2
iNS15-R3-1_SW_RC3_01_8032	Electron transfer flavoprotein subunit beta OS=Sus scrofa OX=9823 GN=ETFB PE=1 SV=1	tr|A0A5G2R0H0|A0A5G2R0H0_PIG	27607		2.5	IRVKPDR	RT: 58.91
iNS15-R3-1_SW_RC3_01_8032	Electron transfer flavoprotein subunit beta OS=Sus scrofa OX=9823 GN=ETFB PE=1 SV=1	tr|A0A5G2R0H0|A0A5G2R0H0_PIG	92283		2.2	TGVVMDGVK	RT: 71.53
iNS15-R3-1_SW_RC3_01_8032	Electron transfer flavoprotein subunit beta OS=Sus scrofa OX=9823 GN=ETFB PE=1 SV=1	tr|A0A5G2R0H0|A0A5G2R0H0_PIG	175085		2.5	TGVVMDGVK	RT: 68.12
iNS15-R3-1_SW_RC3_01_8032	Electron transfer flavoprotein subunit beta OS=Sus scrofa OX=9823 GN=ETFB PE=1 SV=1	tr|A0A5G2R0H0|A0A5G2R0H0_PIG	61408		-1.9	HSMNPFCEIAVEEAVR	RT: 92.68
iNS15-R3-1_SW_RC3_01_8032	Electron transfer flavoprotein subunit beta OS=Sus scrofa OX=9823 GN=ETFB PE=1 SV=1	tr|A0A5G2R0H0|A0A5G2R0H0_PIG	75943		1.1	EVIAVSCGPAQCQETIR	RT: 74.04
iNS15-R3-1_SW_RC3_01_8032	Electron transfer flavoprotein subunit beta OS=Sus scrofa OX=9823 GN=ETFB PE=1 SV=1	tr|A0A5G2R0H0|A0A5G2R0H0_PIG	76494		-4.1	TALAMGADR	RT: 44.07
iNS15-R3-1_SW_RC3_01_8032	Electron transfer flavoprotein subunit beta OS=Sus scrofa OX=9823 GN=ETFB PE=1 SV=1	tr|A0A5G2R0H0|A0A5G2R0H0_PIG	223250		2.1	TALAMGADR	RT: 53.26
iNS15-R3-1_SW_RC3_01_8032	Electron transfer flavoprotein subunit beta OS=Sus scrofa OX=9823 GN=ETFB PE=1 SV=1	tr|A0A5G2R0H0|A0A5G2R0H0_PIG	20881		-1.2	VLAKLAQK	RT: 62.08
iNS15-R3-1_SW_RC3_01_8032	Electron transfer flavoprotein subunit beta OS=Sus scrofa OX=9823 GN=ETFB PE=1 SV=1	tr|A0A5G2R0H0|A0A5G2R0H0_PIG	112594		-1	VDLVLLGK	RT: 64.44
iNS15-R3-1_SW_RC3_01_8032	Electron transfer flavoprotein subunit beta OS=Sus scrofa OX=9823 GN=ETFB PE=1 SV=1	tr|A0A5G2R0H0|A0A5G2R0H0_PIG	28272		0.5	VDLVLLGKQGTFASQVTLEGDK	RT: 102.55
iNS15-R3-1_SW_RC3_01_8032	Electron transfer flavoprotein subunit beta OS=Sus scrofa OX=9823 GN=ETFB PE=1 SV=1	tr|A0A5G2R0H0|A0A5G2R0H0_PIG	192299		0.7	QGTFASQVTLEGDK	RT: 70.71
iNS15-R3-1_SW_RC3_01_8032	Electron transfer flavoprotein subunit beta OS=Sus scrofa OX=9823 GN=ETFB PE=1 SV=1	tr|A0A5G2R0H0|A0A5G2R0H0_PIG	39330		-3.1	VEREIDGGLETLR	RT: 99.55
iNS15-R3-1_SW_RC3_01_8032	Electron transfer flavoprotein subunit beta OS=Sus scrofa OX=9823 GN=ETFB PE=1 SV=1	tr|A0A5G2R0H0|A0A5G2R0H0_PIG	64315		-4.2	EIDGGLETLR	RT: 72.86
iNS15-R3-1_SW_RC3_01_8032	Electron transfer flavoprotein subunit beta OS=Sus scrofa OX=9823 GN=ETFB PE=1 SV=1	tr|A0A5G2R0H0|A0A5G2R0H0_PIG	82631		-1.4	LKLPAVVTADLR	RT: 32.03
iNS15-R3-1_SW_RC3_01_8032	Electron transfer flavoprotein subunit beta OS=Sus scrofa OX=9823 GN=ETFB PE=1 SV=1	tr|A0A5G2R0H0|A0A5G2R0H0_PIG	10735		-0.4	LPAVVTADLRLNEPR	RT: 65.92
iNS15-R3-1_SW_RC3_01_8032	Electron transfer flavoprotein subunit beta OS=Sus scrofa OX=9823 GN=ETFB PE=1 SV=1	tr|A0A5G2R0H0|A0A5G2R0H0_PIG	528447		-2.1	LPAVVTADLRLNEPR	RT: 65.92
iNS15-R3-1_SW_RC3_01_8032	Electron transfer flavoprotein subunit beta OS=Sus scrofa OX=9823 GN=ETFB PE=1 SV=1	tr|A0A5G2R0H0|A0A5G2R0H0_PIG	43947		-5.8	AGDLGVDLTSK	RT: 67.5
iNS15-R3-1_SW_RC3_01_8032	Electron transfer flavoprotein subunit beta OS=Sus scrofa OX=9823 GN=ETFB PE=1 SV=1	tr|A0A5G2R0H0|A0A5G2R0H0_PIG	107217		-4.6	LSVVSVEDPPQR	RT: 58.2
iNS15-R3-1_SW_RC3_01_8032	Electron transfer flavoprotein subunit beta OS=Sus scrofa OX=9823 GN=ETFB PE=1 SV=1	tr|A0A5G2R0H0|A0A5G2R0H0_PIG	380798		-4.8	LSVVSVEDPPQR	RT: 58.2
iNS15-R3-1_SW_RC3_01_8032	Electron transfer flavoprotein subunit beta OS=Sus scrofa OX=9823 GN=ETFB PE=1 SV=1	tr|A0A5G2R0H0|A0A5G2R0H0_PIG	41724		-4.2	VAGVKVETTEDLVAK	RT: 64.24
iNS7-R1-1_SW_RA8_01_8013	Electron transfer flavoprotein subunit beta OS=Sus scrofa OX=9823 GN=ETFB PE=1 SV=1	tr|A0A5G2R0H0|A0A5G2R0H0_PIG	312198		-2.6	MAELRALVAVK	RT: 43.24
iNS7-R1-1_SW_RA8_01_8013	Electron transfer flavoprotein subunit beta OS=Sus scrofa OX=9823 GN=ETFB PE=1 SV=1	tr|A0A5G2R0H0|A0A5G2R0H0_PIG	214776		4.9	MAELRALVAVK	RT: 53.32
iNS7-R1-1_SW_RA8_01_8013	Electron transfer flavoprotein subunit beta OS=Sus scrofa OX=9823 GN=ETFB PE=1 SV=1	tr|A0A5G2R0H0|A0A5G2R0H0_PIG	1899411		-8.9	VIDFAVKIR	RT: 65.91
iNS7-R1-1_SW_RA8_01_8013	Electron transfer flavoprotein subunit beta OS=Sus scrofa OX=9823 GN=ETFB PE=1 SV=1	tr|A0A5G2R0H0|A0A5G2R0H0_PIG	3023033		-7.1	IRVKPDR	RT: 64.31
iNS7-R1-1_SW_RA8_01_8013	Electron transfer flavoprotein subunit beta OS=Sus scrofa OX=9823 GN=ETFB PE=1 SV=1	tr|A0A5G2R0H0|A0A5G2R0H0_PIG	133722		-2.8	TGVVMDGVK	RT: 75.71
iNS7-R1-1_SW_RA8_01_8013	Electron transfer flavoprotein subunit beta OS=Sus scrofa OX=9823 GN=ETFB PE=1 SV=1	tr|A0A5G2R0H0|A0A5G2R0H0_PIG	195434		1.2	TGVVMDGVK	RT: 59.51
iNS7-R1-1_SW_RA8_01_8013	Electron transfer flavoprotein subunit beta OS=Sus scrofa OX=9823 GN=ETFB PE=1 SV=1	tr|A0A5G2R0H0|A0A5G2R0H0_PIG	49913		-3	HSMNPFCEIAVEEAVR	RT: 93.73
iNS7-R1-1_SW_RA8_01_8013	Electron transfer flavoprotein subunit beta OS=Sus scrofa OX=9823 GN=ETFB PE=1 SV=1	tr|A0A5G2R0H0|A0A5G2R0H0_PIG	978842		-5.6	EVIAVSCGPAQCQETIR	RT: 73.55
iNS7-R1-1_SW_RA8_01_8013	Electron transfer flavoprotein subunit beta OS=Sus scrofa OX=9823 GN=ETFB PE=1 SV=1	tr|A0A5G2R0H0|A0A5G2R0H0_PIG	2664541		-9	TALAMGADR	RT: 64.79
iNS7-R1-1_SW_RA8_01_8013	Electron transfer flavoprotein subunit beta OS=Sus scrofa OX=9823 GN=ETFB PE=1 SV=1	tr|A0A5G2R0H0|A0A5G2R0H0_PIG	1684445		-6.8	TALAMGADR	RT: 61.8
iNS7-R1-1_SW_RA8_01_8013	Electron transfer flavoprotein subunit beta OS=Sus scrofa OX=9823 GN=ETFB PE=1 SV=1	tr|A0A5G2R0H0|A0A5G2R0H0_PIG	68818		-5.7	VLAKLAQK	RT: 57.14
iNS7-R1-1_SW_RA8_01_8013	Electron transfer flavoprotein subunit beta OS=Sus scrofa OX=9823 GN=ETFB PE=1 SV=1	tr|A0A5G2R0H0|A0A5G2R0H0_PIG	1850239		-5.4	VDLVLLGK	RT: 59.16
iNS7-R1-1_SW_RA8_01_8013	Electron transfer flavoprotein subunit beta OS=Sus scrofa OX=9823 GN=ETFB PE=1 SV=1	tr|A0A5G2R0H0|A0A5G2R0H0_PIG	87913		-4.3	VDLVLLGKQGTFASQVTLEGDK	RT: 103.23
iNS7-R1-1_SW_RA8_01_8013	Electron transfer flavoprotein subunit beta OS=Sus scrofa OX=9823 GN=ETFB PE=1 SV=1	tr|A0A5G2R0H0|A0A5G2R0H0_PIG	335122		-1.6	QGTFASQVTLEGDK	RT: 67.43
iNS7-R1-1_SW_RA8_01_8013	Electron transfer flavoprotein subunit beta OS=Sus scrofa OX=9823 GN=ETFB PE=1 SV=1	tr|A0A5G2R0H0|A0A5G2R0H0_PIG	239799		-2.6	VEREIDGGLETLR	RT: 97.75
iNS7-R1-1_SW_RA8_01_8013	Electron transfer flavoprotein subunit beta OS=Sus scrofa OX=9823 GN=ETFB PE=1 SV=1	tr|A0A5G2R0H0|A0A5G2R0H0_PIG	2226458		-6.7	EIDGGLETLR	RT: 69.03
iNS7-R1-1_SW_RA8_01_8013	Electron transfer flavoprotein subunit beta OS=Sus scrofa OX=9823 GN=ETFB PE=1 SV=1	tr|A0A5G2R0H0|A0A5G2R0H0_PIG	2788611		-7.6	LKLPAVVTADLR	RT: 64.52
iNS7-R1-1_SW_RA8_01_8013	Electron transfer flavoprotein subunit beta OS=Sus scrofa OX=9823 GN=ETFB PE=1 SV=1	tr|A0A5G2R0H0|A0A5G2R0H0_PIG	2058422		-4.1	LPAVVTADLRLNEPR	RT: 65.21
iNS7-R1-1_SW_RA8_01_8013	Electron transfer flavoprotein subunit beta OS=Sus scrofa OX=9823 GN=ETFB PE=1 SV=1	tr|A0A5G2R0H0|A0A5G2R0H0_PIG	1921128		-4.5	LPAVVTADLRLNEPR	RT: 65.21
iNS7-R1-1_SW_RA8_01_8013	Electron transfer flavoprotein subunit beta OS=Sus scrofa OX=9823 GN=ETFB PE=1 SV=1	tr|A0A5G2R0H0|A0A5G2R0H0_PIG	369702		-4.2	AGDLGVDLTSK	RT: 69.73
iNS7-R1-1_SW_RA8_01_8013	Electron transfer flavoprotein subunit beta OS=Sus scrofa OX=9823 GN=ETFB PE=1 SV=1	tr|A0A5G2R0H0|A0A5G2R0H0_PIG	2531085		-8	LSVVSVEDPPQR	RT: 64.31
iNS7-R1-1_SW_RA8_01_8013	Electron transfer flavoprotein subunit beta OS=Sus scrofa OX=9823 GN=ETFB PE=1 SV=1	tr|A0A5G2R0H0|A0A5G2R0H0_PIG	2625971		-7.5	LSVVSVEDPPQR	RT: 64.31
iNS7-R1-1_SW_RA8_01_8013	Electron transfer flavoprotein subunit beta OS=Sus scrofa OX=9823 GN=ETFB PE=1 SV=1	tr|A0A5G2R0H0|A0A5G2R0H0_PIG	2803146		-9.1	VAGVKVETTEDLVAK	RT: 64.79
iNS7-R2-1_SW_RB5_01_8019	Electron transfer flavoprotein subunit beta OS=Sus scrofa OX=9823 GN=ETFB PE=1 SV=1	tr|A0A5G2R0H0|A0A5G2R0H0_PIG	484576		-1.7	MAELRALVAVK	RT: 43.89
iNS7-R2-1_SW_RB5_01_8019	Electron transfer flavoprotein subunit beta OS=Sus scrofa OX=9823 GN=ETFB PE=1 SV=1	tr|A0A5G2R0H0|A0A5G2R0H0_PIG	239711		-3	MAELRALVAVK	RT: 51.13
iNS7-R2-1_SW_RB5_01_8019	Electron transfer flavoprotein subunit beta OS=Sus scrofa OX=9823 GN=ETFB PE=1 SV=1	tr|A0A5G2R0H0|A0A5G2R0H0_PIG	1613101		-8	VIDFAVKIR	RT: 64.28
iNS7-R2-1_SW_RB5_01_8019	Electron transfer flavoprotein subunit beta OS=Sus scrofa OX=9823 GN=ETFB PE=1 SV=1	tr|A0A5G2R0H0|A0A5G2R0H0_PIG	1558763		-8.4	IRVKPDR	RT: 64.28
iNS7-R2-1_SW_RB5_01_8019	Electron transfer flavoprotein subunit beta OS=Sus scrofa OX=9823 GN=ETFB PE=1 SV=1	tr|A0A5G2R0H0|A0A5G2R0H0_PIG	3325		1.7	TGVVMDGVK	RT: 75.06
iNS7-R2-1_SW_RB5_01_8019	Electron transfer flavoprotein subunit beta OS=Sus scrofa OX=9823 GN=ETFB PE=1 SV=1	tr|A0A5G2R0H0|A0A5G2R0H0_PIG	11381		-6.3	TGVVMDGVK	RT: 63.3
iNS7-R2-1_SW_RB5_01_8019	Electron transfer flavoprotein subunit beta OS=Sus scrofa OX=9823 GN=ETFB PE=1 SV=1	tr|A0A5G2R0H0|A0A5G2R0H0_PIG	2093		-1.8	HSMNPFCEIAVEEAVR	RT: 93.31
iNS7-R2-1_SW_RB5_01_8019	Electron transfer flavoprotein subunit beta OS=Sus scrofa OX=9823 GN=ETFB PE=1 SV=1	tr|A0A5G2R0H0|A0A5G2R0H0_PIG	7125		4	EVIAVSCGPAQCQETIR	RT: 70.89
iNS7-R2-1_SW_RB5_01_8019	Electron transfer flavoprotein subunit beta OS=Sus scrofa OX=9823 GN=ETFB PE=1 SV=1	tr|A0A5G2R0H0|A0A5G2R0H0_PIG	46474		-2.6	TALAMGADR	RT: 37
iNS7-R2-1_SW_RB5_01_8019	Electron transfer flavoprotein subunit beta OS=Sus scrofa OX=9823 GN=ETFB PE=1 SV=1	tr|A0A5G2R0H0|A0A5G2R0H0_PIG	52877		4.2	TALAMGADR	RT: 39.85
iNS7-R2-1_SW_RB5_01_8019	Electron transfer flavoprotein subunit beta OS=Sus scrofa OX=9823 GN=ETFB PE=1 SV=1	tr|A0A5G2R0H0|A0A5G2R0H0_PIG	6270		-6.3	VLAKLAQK	RT: 65.67
iNS7-R2-1_SW_RB5_01_8019	Electron transfer flavoprotein subunit beta OS=Sus scrofa OX=9823 GN=ETFB PE=1 SV=1	tr|A0A5G2R0H0|A0A5G2R0H0_PIG	7562		5.8	VDLVLLGK	RT: 85.15
iNS7-R2-1_SW_RB5_01_8019	Electron transfer flavoprotein subunit beta OS=Sus scrofa OX=9823 GN=ETFB PE=1 SV=1	tr|A0A5G2R0H0|A0A5G2R0H0_PIG	437		-6.7	VDLVLLGKQGTFASQVTLEGDK	RT: 99.56
iNS7-R2-1_SW_RB5_01_8019	Electron transfer flavoprotein subunit beta OS=Sus scrofa OX=9823 GN=ETFB PE=1 SV=1	tr|A0A5G2R0H0|A0A5G2R0H0_PIG	6422		1.3	QGTFASQVTLEGDK	RT: 63.93
iNS7-R2-1_SW_RB5_01_8019	Electron transfer flavoprotein subunit beta OS=Sus scrofa OX=9823 GN=ETFB PE=1 SV=1	tr|A0A5G2R0H0|A0A5G2R0H0_PIG	2128		-4.7	VEREIDGGLETLR	RT: 96.49
iNS7-R2-1_SW_RB5_01_8019	Electron transfer flavoprotein subunit beta OS=Sus scrofa OX=9823 GN=ETFB PE=1 SV=1	tr|A0A5G2R0H0|A0A5G2R0H0_PIG	16340		-4.6	EIDGGLETLR	RT: 72.28
iNS7-R2-1_SW_RB5_01_8019	Electron transfer flavoprotein subunit beta OS=Sus scrofa OX=9823 GN=ETFB PE=1 SV=1	tr|A0A5G2R0H0|A0A5G2R0H0_PIG	104044		-5.7	LKLPAVVTADLR	RT: 37.55
iNS7-R2-1_SW_RB5_01_8019	Electron transfer flavoprotein subunit beta OS=Sus scrofa OX=9823 GN=ETFB PE=1 SV=1	tr|A0A5G2R0H0|A0A5G2R0H0_PIG	77292		-2.1	LPAVVTADLRLNEPR	RT: 52.79
iNS7-R2-1_SW_RB5_01_8019	Electron transfer flavoprotein subunit beta OS=Sus scrofa OX=9823 GN=ETFB PE=1 SV=1	tr|A0A5G2R0H0|A0A5G2R0H0_PIG	91846		-0.5	LPAVVTADLRLNEPR	RT: 52.79
iNS7-R2-1_SW_RB5_01_8019	Electron transfer flavoprotein subunit beta OS=Sus scrofa OX=9823 GN=ETFB PE=1 SV=1	tr|A0A5G2R0H0|A0A5G2R0H0_PIG	2166		-2.4	AGDLGVDLTSK	RT: 66.02
iNS7-R2-1_SW_RB5_01_8019	Electron transfer flavoprotein subunit beta OS=Sus scrofa OX=9823 GN=ETFB PE=1 SV=1	tr|A0A5G2R0H0|A0A5G2R0H0_PIG	159657		-8	LSVVSVEDPPQR	RT: 64.28
iNS7-R2-1_SW_RB5_01_8019	Electron transfer flavoprotein subunit beta OS=Sus scrofa OX=9823 GN=ETFB PE=1 SV=1	tr|A0A5G2R0H0|A0A5G2R0H0_PIG	161101		-8	LSVVSVEDPPQR	RT: 64.28
iNS7-R2-1_SW_RB5_01_8019	Electron transfer flavoprotein subunit beta OS=Sus scrofa OX=9823 GN=ETFB PE=1 SV=1	tr|A0A5G2R0H0|A0A5G2R0H0_PIG	85576		-1.5	VAGVKVETTEDLVAK	RT: 64.84
iNS7-R3-1_SW_RC5_01_8031	Electron transfer flavoprotein subunit beta OS=Sus scrofa OX=9823 GN=ETFB PE=1 SV=1	tr|A0A5G2R0H0|A0A5G2R0H0_PIG	397851		-2.1	MAELRALVAVK	RT: 41.72
iNS7-R3-1_SW_RC5_01_8031	Electron transfer flavoprotein subunit beta OS=Sus scrofa OX=9823 GN=ETFB PE=1 SV=1	tr|A0A5G2R0H0|A0A5G2R0H0_PIG	281548		-0.7	MAELRALVAVK	RT: 52.42
iNS7-R3-1_SW_RC5_01_8031	Electron transfer flavoprotein subunit beta OS=Sus scrofa OX=9823 GN=ETFB PE=1 SV=1	tr|A0A5G2R0H0|A0A5G2R0H0_PIG	1854052		-5.4	VIDFAVKIR	RT: 61.27
iNS7-R3-1_SW_RC5_01_8031	Electron transfer flavoprotein subunit beta OS=Sus scrofa OX=9823 GN=ETFB PE=1 SV=1	tr|A0A5G2R0H0|A0A5G2R0H0_PIG	1325666		-4	IRVKPDR	RT: 61.84
iNS7-R3-1_SW_RC5_01_8031	Electron transfer flavoprotein subunit beta OS=Sus scrofa OX=9823 GN=ETFB PE=1 SV=1	tr|A0A5G2R0H0|A0A5G2R0H0_PIG	25213		-3.6	TGVVMDGVK	RT: 75.23
iNS7-R3-1_SW_RC5_01_8031	Electron transfer flavoprotein subunit beta OS=Sus scrofa OX=9823 GN=ETFB PE=1 SV=1	tr|A0A5G2R0H0|A0A5G2R0H0_PIG	363109		1.9	TGVVMDGVK	RT: 68.07
iNS7-R3-1_SW_RC5_01_8031	Electron transfer flavoprotein subunit beta OS=Sus scrofa OX=9823 GN=ETFB PE=1 SV=1	tr|A0A5G2R0H0|A0A5G2R0H0_PIG	16283		-3.7	HSMNPFCEIAVEEAVR	RT: 92.69
iNS7-R3-1_SW_RC5_01_8031	Electron transfer flavoprotein subunit beta OS=Sus scrofa OX=9823 GN=ETFB PE=1 SV=1	tr|A0A5G2R0H0|A0A5G2R0H0_PIG	90174		-7.6	EVIAVSCGPAQCQETIR	RT: 73.49
iNS7-R3-1_SW_RC5_01_8031	Electron transfer flavoprotein subunit beta OS=Sus scrofa OX=9823 GN=ETFB PE=1 SV=1	tr|A0A5G2R0H0|A0A5G2R0H0_PIG	82954		-5.6	TALAMGADR	RT: 39.9
iNS7-R3-1_SW_RC5_01_8031	Electron transfer flavoprotein subunit beta OS=Sus scrofa OX=9823 GN=ETFB PE=1 SV=1	tr|A0A5G2R0H0|A0A5G2R0H0_PIG	126787		-1.2	TALAMGADR	RT: 17.71
iNS7-R3-1_SW_RC5_01_8031	Electron transfer flavoprotein subunit beta OS=Sus scrofa OX=9823 GN=ETFB PE=1 SV=1	tr|A0A5G2R0H0|A0A5G2R0H0_PIG	24187		-7	VLAKLAQK	RT: 60
iNS7-R3-1_SW_RC5_01_8031	Electron transfer flavoprotein subunit beta OS=Sus scrofa OX=9823 GN=ETFB PE=1 SV=1	tr|A0A5G2R0H0|A0A5G2R0H0_PIG	90212		0.7	VDLVLLGK	RT: 63.76
iNS7-R3-1_SW_RC5_01_8031	Electron transfer flavoprotein subunit beta OS=Sus scrofa OX=9823 GN=ETFB PE=1 SV=1	tr|A0A5G2R0H0|A0A5G2R0H0_PIG	35682		0.7	VDLVLLGKQGTFASQVTLEGDK	RT: 102.42
iNS7-R3-1_SW_RC5_01_8031	Electron transfer flavoprotein subunit beta OS=Sus scrofa OX=9823 GN=ETFB PE=1 SV=1	tr|A0A5G2R0H0|A0A5G2R0H0_PIG	65322		-0.9	QGTFASQVTLEGDK	RT: 68.35
iNS7-R3-1_SW_RC5_01_8031	Electron transfer flavoprotein subunit beta OS=Sus scrofa OX=9823 GN=ETFB PE=1 SV=1	tr|A0A5G2R0H0|A0A5G2R0H0_PIG	28880		3.5	VEREIDGGLETLR	RT: 102.41
iNS7-R3-1_SW_RC5_01_8031	Electron transfer flavoprotein subunit beta OS=Sus scrofa OX=9823 GN=ETFB PE=1 SV=1	tr|A0A5G2R0H0|A0A5G2R0H0_PIG	87343		-7.4	EIDGGLETLR	RT: 73.49
iNS7-R3-1_SW_RC5_01_8031	Electron transfer flavoprotein subunit beta OS=Sus scrofa OX=9823 GN=ETFB PE=1 SV=1	tr|A0A5G2R0H0|A0A5G2R0H0_PIG	37506		-5.2	LKLPAVVTADLR	RT: 37.9
iNS7-R3-1_SW_RC5_01_8031	Electron transfer flavoprotein subunit beta OS=Sus scrofa OX=9823 GN=ETFB PE=1 SV=1	tr|A0A5G2R0H0|A0A5G2R0H0_PIG	35169		7.2	LPAVVTADLRLNEPR	RT: 52.63
iNS7-R3-1_SW_RC5_01_8031	Electron transfer flavoprotein subunit beta OS=Sus scrofa OX=9823 GN=ETFB PE=1 SV=1	tr|A0A5G2R0H0|A0A5G2R0H0_PIG	166649		4	LPAVVTADLRLNEPR	RT: 52.63
iNS7-R3-1_SW_RC5_01_8031	Electron transfer flavoprotein subunit beta OS=Sus scrofa OX=9823 GN=ETFB PE=1 SV=1	tr|A0A5G2R0H0|A0A5G2R0H0_PIG	20520		-2.3	AGDLGVDLTSK	RT: 67.59
iNS7-R3-1_SW_RC5_01_8031	Electron transfer flavoprotein subunit beta OS=Sus scrofa OX=9823 GN=ETFB PE=1 SV=1	tr|A0A5G2R0H0|A0A5G2R0H0_PIG	77539		-6.5	LSVVSVEDPPQR	RT: 73.49
iNS7-R3-1_SW_RC5_01_8031	Electron transfer flavoprotein subunit beta OS=Sus scrofa OX=9823 GN=ETFB PE=1 SV=1	tr|A0A5G2R0H0|A0A5G2R0H0_PIG	78451		-6.4	LSVVSVEDPPQR	RT: 73.49
iNS7-R3-1_SW_RC5_01_8031	Electron transfer flavoprotein subunit beta OS=Sus scrofa OX=9823 GN=ETFB PE=1 SV=1	tr|A0A5G2R0H0|A0A5G2R0H0_PIG	53903		-4.1	VAGVKVETTEDLVAK	RT: 64.45
PEF-R1-1_SW_RA7_01_8012	Electron transfer flavoprotein subunit beta OS=Sus scrofa OX=9823 GN=ETFB PE=1 SV=1	tr|A0A5G2R0H0|A0A5G2R0H0_PIG	8797		3.4	MAELRALVAVK	RT: 38.88
PEF-R1-1_SW_RA7_01_8012	Electron transfer flavoprotein subunit beta OS=Sus scrofa OX=9823 GN=ETFB PE=1 SV=1	tr|A0A5G2R0H0|A0A5G2R0H0_PIG	129390		-2.5	MAELRALVAVK	RT: 51.17
PEF-R1-1_SW_RA7_01_8012	Electron transfer flavoprotein subunit beta OS=Sus scrofa OX=9823 GN=ETFB PE=1 SV=1	tr|A0A5G2R0H0|A0A5G2R0H0_PIG	327446		-5.9	VIDFAVKIR	RT: 57.78
PEF-R1-1_SW_RA7_01_8012	Electron transfer flavoprotein subunit beta OS=Sus scrofa OX=9823 GN=ETFB PE=1 SV=1	tr|A0A5G2R0H0|A0A5G2R0H0_PIG	89604		-7.5	IRVKPDR	RT: 65.71
PEF-R1-1_SW_RA7_01_8012	Electron transfer flavoprotein subunit beta OS=Sus scrofa OX=9823 GN=ETFB PE=1 SV=1	tr|A0A5G2R0H0|A0A5G2R0H0_PIG	82498		-7.1	TGVVMDGVK	RT: 74.12
PEF-R1-1_SW_RA7_01_8012	Electron transfer flavoprotein subunit beta OS=Sus scrofa OX=9823 GN=ETFB PE=1 SV=1	tr|A0A5G2R0H0|A0A5G2R0H0_PIG	255949		4.5	TGVVMDGVK	RT: 84.75
PEF-R1-1_SW_RA7_01_8012	Electron transfer flavoprotein subunit beta OS=Sus scrofa OX=9823 GN=ETFB PE=1 SV=1	tr|A0A5G2R0H0|A0A5G2R0H0_PIG	39406		-2.6	HSMNPFCEIAVEEAVR	RT: 92.55
PEF-R1-1_SW_RA7_01_8012	Electron transfer flavoprotein subunit beta OS=Sus scrofa OX=9823 GN=ETFB PE=1 SV=1	tr|A0A5G2R0H0|A0A5G2R0H0_PIG	300884		-7.4	EVIAVSCGPAQCQETIR	RT: 73.98
PEF-R1-1_SW_RA7_01_8012	Electron transfer flavoprotein subunit beta OS=Sus scrofa OX=9823 GN=ETFB PE=1 SV=1	tr|A0A5G2R0H0|A0A5G2R0H0_PIG	247209		-1.7	TALAMGADR	RT: 42.54
PEF-R1-1_SW_RA7_01_8012	Electron transfer flavoprotein subunit beta OS=Sus scrofa OX=9823 GN=ETFB PE=1 SV=1	tr|A0A5G2R0H0|A0A5G2R0H0_PIG	259654		-8	TALAMGADR	RT: 43.59
PEF-R1-1_SW_RA7_01_8012	Electron transfer flavoprotein subunit beta OS=Sus scrofa OX=9823 GN=ETFB PE=1 SV=1	tr|A0A5G2R0H0|A0A5G2R0H0_PIG	29811		-6.5	VLAKLAQK	RT: 68.49
PEF-R1-1_SW_RA7_01_8012	Electron transfer flavoprotein subunit beta OS=Sus scrofa OX=9823 GN=ETFB PE=1 SV=1	tr|A0A5G2R0H0|A0A5G2R0H0_PIG	61997		2.7	VDLVLLGK	RT: 85.73
PEF-R1-1_SW_RA7_01_8012	Electron transfer flavoprotein subunit beta OS=Sus scrofa OX=9823 GN=ETFB PE=1 SV=1	tr|A0A5G2R0H0|A0A5G2R0H0_PIG	228817		-3	VDLVLLGKQGTFASQVTLEGDK	RT: 100.47
PEF-R1-1_SW_RA7_01_8012	Electron transfer flavoprotein subunit beta OS=Sus scrofa OX=9823 GN=ETFB PE=1 SV=1	tr|A0A5G2R0H0|A0A5G2R0H0_PIG	105032		-5.6	QGTFASQVTLEGDK	RT: 69.83
PEF-R1-1_SW_RA7_01_8012	Electron transfer flavoprotein subunit beta OS=Sus scrofa OX=9823 GN=ETFB PE=1 SV=1	tr|A0A5G2R0H0|A0A5G2R0H0_PIG	91447		-3	VEREIDGGLETLR	RT: 99.92
PEF-R1-1_SW_RA7_01_8012	Electron transfer flavoprotein subunit beta OS=Sus scrofa OX=9823 GN=ETFB PE=1 SV=1	tr|A0A5G2R0H0|A0A5G2R0H0_PIG	392559		-2.7	EIDGGLETLR	RT: 72.03
PEF-R1-1_SW_RA7_01_8012	Electron transfer flavoprotein subunit beta OS=Sus scrofa OX=9823 GN=ETFB PE=1 SV=1	tr|A0A5G2R0H0|A0A5G2R0H0_PIG	361494		-7.8	LKLPAVVTADLR	RT: 55.2
PEF-R1-1_SW_RA7_01_8012	Electron transfer flavoprotein subunit beta OS=Sus scrofa OX=9823 GN=ETFB PE=1 SV=1	tr|A0A5G2R0H0|A0A5G2R0H0_PIG	313538		-7.2	LPAVVTADLRLNEPR	RT: 54.65
PEF-R1-1_SW_RA7_01_8012	Electron transfer flavoprotein subunit beta OS=Sus scrofa OX=9823 GN=ETFB PE=1 SV=1	tr|A0A5G2R0H0|A0A5G2R0H0_PIG	307097		-7.2	LPAVVTADLRLNEPR	RT: 54.65
PEF-R1-1_SW_RA7_01_8012	Electron transfer flavoprotein subunit beta OS=Sus scrofa OX=9823 GN=ETFB PE=1 SV=1	tr|A0A5G2R0H0|A0A5G2R0H0_PIG	38874		-1.2	AGDLGVDLTSK	RT: 69.25
[truncated: 49 more rows]

## Sheet: A8U4R4
Replicate	Protein Description	Protein Name	Total Area		Average Mass Error PPM	Peptide Sequence	Peptide Result
[truncated: 513 more rows]

[truncated: 10 more sheets: B0KYV5, B5APV0, C7AI81, F1RWW4, F1SFZ8, F1SGJ3, I3LPP1, Q007T0, Q6DUB7, Q6QA25]
