# Supplementary material for: Proteomic landscape of porcine induced neural stem cell reprogramming and differentiation
Source: PeerJ. 2025 Oct 3;13:e20120. doi: 10.7717/peerj.20120 (PMC12499565; doi:10.7717/peerj.20120)
Supplement: Supplemental Information 5 [file peerj-13-20120-s005.xlsx]

## Sheet: Sheet1
Enrichment FDR	nGenes	Pathway Genes	Fold Enrichment	Pathway	URL	Genes
6.82911e-16	7	9	501.549	Arp2/3 protein complex	http://amigo.geneontology.org/amigo/term/GO:0005885	ARPC1A ACTR2 ARPC3 ARPC4 ARPC5 ACTR3 ARPC2
1.07236e-12	8	41	125.824	Structural constituent of cytoskeleton	http://amigo.geneontology.org/amigo/term/GO:0005200	ACTR2 NEFL ARPC3 VIM ARPC4 ARPC5 ACTR3 ARPC2
2.98798e-12	7	25	180.558	Arp2/3 complex-mediated actin nucleation	http://amigo.geneontology.org/amigo/term/GO:0034314	ARPC1A ACTR2 ARPC3 ARPC4 ARPC5 ACTR3 ARPC2
1.55742e-11	7	32	141.061	RHO GTPases Activate WASPs and WAVEs	https://reactome.org/download/current	ARPC1A ACTR2 ARPC3 ARPC4 ARPC5 ACTR3 ARPC2
3.07685e-11	7	36	125.387	EPHB-mediated forward signaling	https://reactome.org/download/current	ARPC1A ACTR2 ARPC3 ARPC4 ARPC5 ACTR3 ARPC2
4.7092e-11	7	39	115.742	Actin nucleation	http://amigo.geneontology.org/amigo/term/GO:0045010	ARPC1A ACTR2 ARPC3 ARPC4 ARPC5 ACTR3 ARPC2
9.90988e-10	7	60	75.2323	EPH-Ephrin signaling	https://reactome.org/download/current	ARPC1A ACTR2 ARPC3 ARPC4 ARPC5 ACTR3 ARPC2
1.41331e-09	9	182	31.8881	Regulation of actin filament organization	http://amigo.geneontology.org/amigo/term/GO:0110053	ARPC1A ACTR2 ARPC3 ARPC4 ARPC5 ACTR3 ARPC2 STMN1 LIMA1
1.85729e-09	8	121	42.6346	Regulation of actin polymerization or depolymerization	http://amigo.geneontology.org/amigo/term/GO:0008064	ARPC1A ACTR2 ARPC3 ARPC4 ARPC5 ACTR3 ARPC2 LIMA1
1.85729e-09	8	121	42.6346	Regulation of actin filament length	http://amigo.geneontology.org/amigo/term/GO:0030832	ARPC1A ACTR2 ARPC3 ARPC4 ARPC5 ACTR3 ARPC2 LIMA1
1.93659e-09	7	70	64.4848	Positive regulation of actin filament polymerization	http://amigo.geneontology.org/amigo/term/GO:0030838	ARPC1A ACTR2 ARPC3 ARPC4 ARPC5 ACTR3 ARPC2
2.92353e-09	7	75	60.1859	Bacterial invasion of epithelial cells	http://www.genome.jp/kegg-bin/show_pathway?ssc05100	ARPC1A ACTR2 ARPC3 ARPC4 ARPC5 ACTR3 ARPC2
3.22426e-09	10	308	20.9366	Regulation of anatomical structure size	http://amigo.geneontology.org/amigo/term/GO:0090066	ARPC1A ACTR2 NEFL ARPC3 ARPC4 ARPC5 ACTR3 ARPC2 LIMA1 KLF2
4.57022e-09	8	141	36.5871	Actin polymerization or depolymerization	http://amigo.geneontology.org/amigo/term/GO:0008154	ARPC1A ACTR2 ARPC3 ARPC4 ARPC5 ACTR3 ARPC2 LIMA1
5.69394e-09	9	228	25.4545	Regulation of actin cytoskeleton organization	http://amigo.geneontology.org/amigo/term/GO:0032956	ARPC1A ACTR2 ARPC3 ARPC4 ARPC5 ACTR3 ARPC2 STMN1 LIMA1
6.19229e-09	8	150	34.3919	Regulation of protein polymerization	http://amigo.geneontology.org/amigo/term/GO:0032271	ARPC1A ACTR2 ARPC3 ARPC4 ARPC5 ACTR3 ARPC2 STMN1
6.19229e-09	9	233	24.9083	Regulation of cellular component size	http://amigo.geneontology.org/amigo/term/GO:0032535	ARPC1A ACTR2 NEFL ARPC3 ARPC4 ARPC5 ACTR3 ARPC2 LIMA1
7.12278e-09	7	90	50.1549	Fc gamma R-mediated phagocytosis	http://www.genome.jp/kegg-bin/show_pathway?ssc04666	ARPC1A ACTR2 ARPC3 ARPC4 ARPC5 ACTR3 ARPC2
7.12278e-09	11	476	14.902	Supramolecular fiber organization	http://amigo.geneontology.org/amigo/term/GO:0097435	ARPC1A ACTR2 NEFL ARPC3 VIM ARPC4 ARPC5 ACTR3 ARPC2 STMN1 LIMA1
8.00622e-09	7	93	48.537	Positive regulation of protein polymerization	http://amigo.geneontology.org/amigo/term/GO:0032273	ARPC1A ACTR2 ARPC3 ARPC4 ARPC5 ACTR3 ARPC2
8.00622e-09	9	246	23.592	Regulation of actin filament-based process	http://amigo.geneontology.org/amigo/term/GO:0032970	ARPC1A ACTR2 ARPC3 ARPC4 ARPC5 ACTR3 ARPC2 STMN1 LIMA1
1.01579e-08	9	254	22.849	Regulation of supramolecular fiber organization	http://amigo.geneontology.org/amigo/term/GO:1902903	ARPC1A ACTR2 ARPC3 ARPC4 ARPC5 ACTR3 ARPC2 STMN1 LIMA1
2.14024e-08	9	279	20.8016	Actin filament organization	http://amigo.geneontology.org/amigo/term/GO:0007015	ARPC1A ACTR2 ARPC3 ARPC4 ARPC5 ACTR3 ARPC2 STMN1 LIMA1
2.14024e-08	7	109	41.4123	Regulation of actin filament polymerization	http://amigo.geneontology.org/amigo/term/GO:0030833	ARPC1A ACTR2 ARPC3 ARPC4 ARPC5 ACTR3 ARPC2
3.02805e-08	8	192	26.8687	Protein polymerization	http://amigo.geneontology.org/amigo/term/GO:0051258	ARPC1A ACTR2 ARPC3 ARPC4 ARPC5 ACTR3 ARPC2 STMN1
3.42264e-08	7	118	38.2537	Actin filament polymerization	http://amigo.geneontology.org/amigo/term/GO:0030041	ARPC1A ACTR2 ARPC3 ARPC4 ARPC5 ACTR3 ARPC2
4.16947e-08	7	122	36.9995	Clathrin-mediated endocytosis	https://reactome.org/download/current	ARPC1A ACTR2 ARPC3 ARPC4 ARPC5 ACTR3 ARPC2
4.25861e-08	7	123	36.6987	Actin filament binding	http://amigo.geneontology.org/amigo/term/GO:0051015	ACTR2 ARPC3 ARPC4 ARPC5 ACTR3 ARPC2 LIMA1
6.06971e-08	7	130	34.7226	Yersinia infection	http://www.genome.jp/kegg-bin/show_pathway?ssc05135	ARPC1A ACTR2 ARPC3 ARPC4 ARPC5 ACTR3 ARPC2
8.92215e-08	7	138	32.7097	Positive regulation of supramolecular fiber organization	http://amigo.geneontology.org/amigo/term/GO:1902905	ARPC1A ACTR2 ARPC3 ARPC4 ARPC5 ACTR3 ARPC2
9.55023e-08	7	140	32.2424	Regulation of actin dynamics for phagocytic cup formation	https://reactome.org/download/current	ARPC1A ACTR2 ARPC3 ARPC4 ARPC5 ACTR3 ARPC2
1.36825e-07	9	356	16.3023	Regulation of cytoskeleton organization	http://amigo.geneontology.org/amigo/term/GO:0051493	ARPC1A ACTR2 ARPC3 ARPC4 ARPC5 ACTR3 ARPC2 STMN1 LIMA1
1.59432e-07	7	152	29.697	Positive regulation of cytoskeleton organization	http://amigo.geneontology.org/amigo/term/GO:0051495	ARPC1A ACTR2 ARPC3 ARPC4 ARPC5 ACTR3 ARPC2
1.61988e-07	7	153	29.5029	Tight junction	http://www.genome.jp/kegg-bin/show_pathway?ssc04530	ARPC1A ACTR2 ARPC3 ARPC4 ARPC5 ACTR3 ARPC2
1.96908e-07	7	158	28.5692	Positive regulation of protein-containing complex assembly	http://amigo.geneontology.org/amigo/term/GO:0031334	ARPC1A ACTR2 ARPC3 ARPC4 ARPC5 ACTR3 ARPC2
2.18231e-07	7	161	28.0369	Fcgamma receptor (FCGR) dependent phagocytosis	https://reactome.org/download/current	ARPC1A ACTR2 ARPC3 ARPC4 ARPC5 ACTR3 ARPC2
2.23447e-07	4	14	184.242	Asymmetric cell division	http://amigo.geneontology.org/amigo/term/GO:0008356	POU5F1 ACTR2 PAX6 ACTR3
3.26358e-07	12	933	8.29387	Cytoskeleton organization	http://amigo.geneontology.org/amigo/term/GO:0007010	ARPC1A ACTR2 NEFL ARPC3 VIM ARPC4 PAX6 ARPC5 ACTR3 ARPC2 STMN1 LIMA1
3.68897e-07	8	279	18.4903	Regulation of protein-containing complex assembly	http://amigo.geneontology.org/amigo/term/GO:0043254	ARPC1A ACTR2 ARPC3 ARPC4 ARPC5 ACTR3 ARPC2 STMN1
5.75743e-07	7	188	24.0103	Axon guidance	https://reactome.org/download/current	ARPC1A ACTR2 ARPC3 ARPC4 ARPC5 ACTR3 ARPC2
5.77146e-07	3	4	483.636	Citrate metabolic process	http://amigo.geneontology.org/amigo/term/GO:0006101	ACO2 ACLY CS
6.82039e-07	6	110	35.1736	Carbon metabolism	http://www.genome.jp/kegg-bin/show_pathway?ssc01200	ACO2 CAT TKT MDH2 CS ALDOB
7.34468e-07	9	447	12.9835	Actin cytoskeleton organization	http://amigo.geneontology.org/amigo/term/GO:0030036	ARPC1A ACTR2 ARPC3 ARPC4 ARPC5 ACTR3 ARPC2 STMN1 LIMA1
9.19527e-07	7	204	22.1272	Regulation of actin cytoskeleton	http://www.genome.jp/kegg-bin/show_pathway?ssc04810	ARPC1A ACTR2 ARPC3 ARPC4 ARPC5 ACTR3 ARPC2
9.9871e-07	8	323	15.9715	Actin cytoskeleton	http://amigo.geneontology.org/amigo/term/GO:0015629	ARPC1A ACTR2 ARPC3 ARPC4 ARPC5 ACTR3 ARPC2 LIMA1
1.08575e-06	10	643	10.0287	Oxidoreductase activity	http://amigo.geneontology.org/amigo/term/GO:0016491	SUOX ETFA GPHN ETFB RPE65 DPYD CP CAT MDH2 RRM2
1.08575e-06	7	211	21.3931	DOID:9007383 Chemical and Drug Induced Liver Injury	ftp://ftp.rgd.mcw.edu/pub/data_release	SUOX ALB VIM CP CAT ACTR3 ALDOB
1.24774e-06	4	22	117.245	DOID:2527 nephrosis	ftp://ftp.rgd.mcw.edu/pub/data_release	NES ALB VIM CAT
1.41936e-06	9	490	11.8442	Actin filament-based process	http://amigo.geneontology.org/amigo/term/GO:0030029	ARPC1A ACTR2 ARPC3 ARPC4 ARPC5 ACTR3 ARPC2 STMN1 LIMA1
1.89951e-06	7	231	19.5409	Endocytosis	http://www.genome.jp/kegg-bin/show_pathway?ssc04144	ARPC1A ACTR2 ARPC3 ARPC4 ARPC5 ACTR3 ARPC2
2.15604e-06	7	236	19.1269	Salmonella infection	http://www.genome.jp/kegg-bin/show_pathway?ssc05132	ARPC1A ACTR2 ARPC3 ARPC4 ARPC5 ACTR3 ARPC2
2.88759e-06	13	1429	5.86636	Metabolic pathways	http://www.genome.jp/kegg-bin/show_pathway?ssc01100	ACO2 SUOX GPHN RPE65 CA2 DPYD CAT ACLY TKT MDH2 RRM2 CS ALDOB
3.64117e-06	4	29	88.9446	Citrate cycle (TCA cycle)	http://www.genome.jp/kegg-bin/show_pathway?ssc00020	ACO2 ACLY MDH2 CS
4.11906e-06	4	30	85.9798	Glyoxylate and dicarboxylate metabolism	http://www.genome.jp/kegg-bin/show_pathway?ssc00630	ACO2 CAT MDH2 CS
4.40504e-06	7	265	17.0337	RHO GTPase Effectors	https://reactome.org/download/current	ARPC1A ACTR2 ARPC3 ARPC4 ARPC5 ACTR3 ARPC2
5.78742e-06	7	277	16.2958	Actin binding	http://amigo.geneontology.org/amigo/term/GO:0003779	ACTR2 ARPC3 ARPC4 ARPC5 ACTR3 ARPC2 LIMA1
5.78742e-06	3	8	241.818	Tricarboxylic acid metabolic process	http://amigo.geneontology.org/amigo/term/GO:0072350	ACO2 ACLY CS
7.30211e-06	9	606	9.57696	Cellular protein-containing complex assembly	http://amigo.geneontology.org/amigo/term/GO:0034622	ARPC1A ACTR2 ARPC3 ARPC4 ARPC5 ACTR3 ARPC2 STMN1 ALDOB
1.26281e-05	8	466	11.0704	Structural molecule activity	http://amigo.geneontology.org/amigo/term/GO:0005198	ACTR2 NEFL ARPC3 VIM ARPC4 ARPC5 ACTR3 ARPC2
1.32254e-05	9	653	8.88765	Cytoskeletal protein binding	http://amigo.geneontology.org/amigo/term/GO:0008092	ACTR2 ARPC3 ARPC4 ARPC5 ACTR3 ARPC2 STMN1 LIMA1 ALDOB
1.68419e-05	12	1398	5.53518	Cytoskeleton	http://amigo.geneontology.org/amigo/term/GO:0005856	NES ARPC1A ACTR2 NEFL ARPC3 VIM ARPC4 ARPC5 ACTR3 ARPC2 LIMA1 ALDOB
1.68419e-05	6	201	19.2492	Cell division	http://amigo.geneontology.org/amigo/term/GO:0051301	POU5F1 ACTR2 PAX6 ACTR3 STMN1 NANOG
2.19151e-05	7	343	13.1602	Positive regulation of organelle organization	http://amigo.geneontology.org/amigo/term/GO:0010638	ARPC1A ACTR2 ARPC3 ARPC4 ARPC5 ACTR3 ARPC2
2.35074e-05	9	705	8.23211	Protein-containing complex binding	http://amigo.geneontology.org/amigo/term/GO:0044877	NES ACTR2 ARPC3 VIM ARPC4 ARPC5 ACTR3 ARPC2 LIMA1
2.72367e-05	7	356	12.6796	Positive regulation of cellular component biogenesis	http://amigo.geneontology.org/amigo/term/GO:0044089	ARPC1A ACTR2 ARPC3 ARPC4 ARPC5 ACTR3 ARPC2
3.09022e-05	6	226	17.1199	Cell leading edge	http://amigo.geneontology.org/amigo/term/GO:0031252	ARPC3 VIM ARPC5 ACTR3 ARPC2 LIMA1
3.18928e-05	7	367	12.2996	Developmental Biology	https://reactome.org/download/current	ARPC1A ACTR2 ARPC3 ARPC4 ARPC5 ACTR3 ARPC2
3.18928e-05	9	736	7.88538	Regulation of organelle organization	http://amigo.geneontology.org/amigo/term/GO:0033043	ARPC1A ACTR2 ARPC3 ARPC4 ARPC5 ACTR3 ARPC2 STMN1 LIMA1
4.47291e-05	7	387	11.6639	Signaling by Rho GTPases	https://reactome.org/download/current	ARPC1A ACTR2 ARPC3 ARPC4 ARPC5 ACTR3 ARPC2
4.67291e-05	3	16	120.909	PW:0000159 Rab family mediated signaling pathway	ftp://ftp.rgd.mcw.edu/pub/data_release	ACTR2 ARPC4 ACTR3
5.39495e-05	4	60	42.9899	DOID:8893 psoriasis	ftp://ftp.rgd.mcw.edu/pub/data_release	ALB ARPC4 CP CAT
6.54958e-05	10	1051	6.13557	Cell projection	http://amigo.geneontology.org/amigo/term/GO:0042995	GPHN ARPC1A NEFL ARPC3 VIM ARPC4 ARPC5 ACTR3 ARPC2 LIMA1
7.58492e-05	10	1070	6.02662	Protein-containing complex subunit organization	http://amigo.geneontology.org/amigo/term/GO:0043933	ARPC1A ACTR2 ARPC3 ARPC4 ARPC5 ACTR3 ARPC2 STMN1 LIMA1 ALDOB
8.06462e-05	10	1079	5.97635	Small molecule metabolic process	http://amigo.geneontology.org/amigo/term/GO:0044281	ACO2 ETFA ETFB DPYD CAT ACLY MDH2 RRM2 CS ALDOB
8.29208e-05	6	274	14.1208	Generation of precursor metabolites and energy	http://amigo.geneontology.org/amigo/term/GO:0006091	ACO2 ETFB CAT TKT MDH2 ALDOB
8.72471e-05	3	20	96.7273	DOID:7998 hyperthyroidism	ftp://ftp.rgd.mcw.edu/pub/data_release	VIM CP CAT
9.79385e-05	4	71	36.3295	Biosynthesis of amino acids	http://www.genome.jp/kegg-bin/show_pathway?ssc01230	ACO2 TKT CS ALDOB
9.85929e-05	3	21	92.1212	Positive regulation of lamellipodium assembly	http://amigo.geneontology.org/amigo/term/GO:0010592	ACTR2 ACTR3 ARPC2
9.85929e-05	8	638	8.08587	Regulation of cellular component biogenesis	http://amigo.geneontology.org/amigo/term/GO:0044087	ARPC1A ACTR2 ARPC3 ARPC4 ARPC5 ACTR3 ARPC2 STMN1
0.000132541	11	1436	4.93965	Metabolism	https://reactome.org/download/current	ACO2 SUOX ETFA GPHN ETFB CA2 ACLY TKT RRM2 CS ALDOB
0.000132541	8	666	7.74593	Positive regulation of cellular component organization	http://amigo.geneontology.org/amigo/term/GO:0051130	ARPC1A ACTR2 NEFL ARPC3 ARPC4 ARPC5 ACTR3 ARPC2
0.000143324	2	3	429.899	Muscle cell projection	http://amigo.geneontology.org/amigo/term/GO:0036194	ARPC1A ARPC2
0.000143324	2	3	429.899	Muscle cell projection membrane	http://amigo.geneontology.org/amigo/term/GO:0036195	ARPC1A ARPC2
0.000143324	2	3	429.899	Regulation of asymmetric cell division	http://amigo.geneontology.org/amigo/term/GO:0009786	POU5F1 PAX6
0.000143324	11	1455	4.87514	Regulation of cellular component organization	http://amigo.geneontology.org/amigo/term/GO:0051128	ARPC1A ACTR2 NEFL ARPC3 VIM ARPC4 ARPC5 ACTR3 ARPC2 STMN1 LIMA1
0.00018952	9	943	6.15444	Protein-containing complex assembly	http://amigo.geneontology.org/amigo/term/GO:0065003	ARPC1A ACTR2 ARPC3 ARPC4 ARPC5 ACTR3 ARPC2 STMN1 ALDOB
0.000194112	3	27	71.6498	Positive regulation of lamellipodium organization	http://amigo.geneontology.org/amigo/term/GO:1902745	ACTR2 ACTR3 ARPC2
0.000214708	3	28	69.0909	Regulation of lamellipodium assembly	http://amigo.geneontology.org/amigo/term/GO:0010591	ACTR2 ACTR3 ARPC2
0.00026261	7	527	8.56535	Carboxylic acid metabolic process	http://amigo.geneontology.org/amigo/term/GO:0019752	ACO2 ETFA ETFB ACLY MDH2 CS ALDOB
0.000263909	7	531	8.50083	Membrane Trafficking	https://reactome.org/download/current	ARPC1A ACTR2 ARPC3 ARPC4 ARPC5 ACTR3 ARPC2
0.000263909	2	4	322.424	DOID:0060358 multiple acyl-CoA dehydrogenase deficiency	ftp://ftp.rgd.mcw.edu/pub/data_release	ETFA ETFB
0.000263909	2	4	322.424	Meiotic cytokinesis	http://amigo.geneontology.org/amigo/term/GO:0033206	ACTR2 ACTR3
0.000263909	2	4	322.424	Chromosome movement towards spindle pole	http://amigo.geneontology.org/amigo/term/GO:0051305	ACTR2 ACTR3
0.000277403	7	536	8.42153	Oxoacid metabolic process	http://amigo.geneontology.org/amigo/term/GO:0043436	ACO2 ETFA ETFB ACLY MDH2 CS ALDOB
0.000309256	7	546	8.26729	Vesicle-mediated transport	https://reactome.org/download/current	ARPC1A ACTR2 ARPC3 ARPC4 ARPC5 ACTR3 ARPC2
0.000332151	4	102	25.2882	DOID:9004575 Neoplasm Invasiveness	ftp://ftp.rgd.mcw.edu/pub/data_release	VIM CAT PAX6 TKT
0.000336519	7	555	8.13322	Organic acid metabolic process	http://amigo.geneontology.org/amigo/term/GO:0006082	ACO2 ETFA ETFB ACLY MDH2 CS ALDOB
0.000338149	4	103	25.0427	DOID:9002457 Experimental Arthritis	ftp://ftp.rgd.mcw.edu/pub/data_release	ALB VIM CP CAT
0.000352086	9	1037	5.59656	Plasma membrane bounded cell projection	http://amigo.geneontology.org/amigo/term/GO:0120025	GPHN ARPC1A NEFL ARPC3 VIM ARPC5 ACTR3 ARPC2 LIMA1
0.000374699	3	35	55.2727	Spindle localization	http://amigo.geneontology.org/amigo/term/GO:0051653	ACTR2 PAX6 ACTR3
0.000397349	2	5	257.939	Acyltransferase, acyl groups converted into alkyl on transfer	http://amigo.geneontology.org/amigo/term/GO:0046912	ACLY CS
0.000397349	2	5	257.939	Citric acid cycle (TCA cycle)	https://reactome.org/download/current	ACO2 CS
0.000402196	4	109	23.6642	DOID:2316 brain ischemia	ftp://ftp.rgd.mcw.edu/pub/data_release	NES ALB CP CAT
0.00041291	4	110	23.449	Lamellipodium	http://amigo.geneontology.org/amigo/term/GO:0030027	ARPC3 ARPC5 ACTR3 ARPC2
0.000422753	3	37	52.285	Regulation of lamellipodium organization	http://amigo.geneontology.org/amigo/term/GO:1902743	ACTR2 ACTR3 ARPC2
0.000450347	4	113	22.8265	The citric acid (TCA) cycle and respiratory electron transport	https://reactome.org/download/current	ACO2 ETFA ETFB CS
0.000695405	8	872	5.91604	Innate Immune System	https://reactome.org/download/current	ARPC1A ACTR2 ARPC3 ARPC4 ARPC5 ACTR3 ARPC2 ACLY
0.000695405	3	44	43.9669	DOID:9002669 Hypoxia	ftp://ftp.rgd.mcw.edu/pub/data_release	TKT CS ALDOB
0.000737582	11	1778	3.9895	Cellular component assembly	http://amigo.geneontology.org/amigo/term/GO:0022607	ARPC1A ACTR2 NEFL ARPC3 ARPC4 ARPC5 ACTR3 ARPC2 STMN1 LIMA1 ALDOB
0.000828346	6	441	8.77345	DOID:684 hepatocellular carcinoma	ftp://ftp.rgd.mcw.edu/pub/data_release	ETFA DPYD ALB CP ACLY STMN1
0.000828346	3	47	41.1605	PW:0000639 insulin responsive facilitative sugar transporter mediated glucose transport pathway	ftp://ftp.rgd.mcw.edu/pub/data_release	ACTR2 ARPC4 ACTR3
0.000875171	8	906	5.69403	Plasma membrane bounded cell projection organization	http://amigo.geneontology.org/amigo/term/GO:0120036	ACTR2 NEFL VIM PAX6 ACTR3 ARPC2 STMN1 LIMA1
0.000930076	8	915	5.63802	Cell projection organization	http://amigo.geneontology.org/amigo/term/GO:0030030	ACTR2 NEFL VIM PAX6 ACTR3 ARPC2 STMN1 LIMA1
0.000992568	2	8	161.212	Fatty acid beta-oxidation using acyl-CoA dehydrogenase	http://amigo.geneontology.org/amigo/term/GO:0033539	ETFA ETFB
0.00101934	3	51	37.9323	Lamellipodium assembly	http://amigo.geneontology.org/amigo/term/GO:0030032	ACTR2 ACTR3 ARPC2
0.00125294	2	9	143.3	Intermediate filament binding	http://amigo.geneontology.org/amigo/term/GO:0019215	NES VIM
0.00138198	11	1919	3.69637	Cellular component biogenesis	http://amigo.geneontology.org/amigo/term/GO:0044085	ARPC1A ACTR2 NEFL ARPC3 ARPC4 ARPC5 ACTR3 ARPC2 STMN1 LIMA1 ALDOB
0.00138698	3	57	33.9394	Cellular response to interferon-gamma	http://amigo.geneontology.org/amigo/term/GO:0071346	ACTR2 VIM ACTR3
0.00152521	2	10	128.97	DOID:2237 hepatitis	ftp://ftp.rgd.mcw.edu/pub/data_release	ALB CAT
0.00156685	5	310	10.4008	Organelle localization	http://amigo.geneontology.org/amigo/term/GO:0051640	ACTR2 ALB NEFL PAX6 ACTR3
0.00165669	3	61	31.7139	Cytoskeleton-dependent cytokinesis	http://amigo.geneontology.org/amigo/term/GO:0061640	ACTR2 ACTR3 STMN1
0.00166999	4	164	15.728	DOID:6000 congestive heart failure	ftp://ftp.rgd.mcw.edu/pub/data_release	ALB CAT ACLY CS
0.00169571	4	165	15.6327	DOID:9000217 Stomach Neoplasms	ftp://ftp.rgd.mcw.edu/pub/data_release	DPYD ALB PAX6 ALDOB
0.00177998	3	63	30.7071	Lamellipodium organization	http://amigo.geneontology.org/amigo/term/GO:0097581	ACTR2 ACTR3 ARPC2
0.00185063	3	64	30.2273	DOID:83 cataract	ftp://ftp.rgd.mcw.edu/pub/data_release	VIM CAT PAX6
0.00198651	4	173	14.9098	DOID:9004009 Reperfusion Injury	ftp://ftp.rgd.mcw.edu/pub/data_release	NES ALB VIM CAT
0.00224676	4	179	14.41	Positive regulation of cell projection organization	http://amigo.geneontology.org/amigo/term/GO:0031346	ACTR2 NEFL ACTR3 ARPC2
0.00235946	3	70	27.6364	Positive regulation of plasma membrane bounded cell projection assembly	http://amigo.geneontology.org/amigo/term/GO:0120034	ACTR2 ACTR3 ARPC2
0.00240459	2	13	99.2075	DOID:9008510 Chronic Hepatitis	ftp://ftp.rgd.mcw.edu/pub/data_release	CP CAT
0.00240459	3	71	27.2471	Response to interferon-gamma	http://amigo.geneontology.org/amigo/term/GO:0034341	ACTR2 VIM ACTR3
0.00240459	5	346	9.31862	Regulation of plasma membrane bounded cell projection organization	http://amigo.geneontology.org/amigo/term/GO:0120035	ACTR2 NEFL VIM ACTR3 ARPC2
0.00241161	5	347	9.29176	DOID:9005643 Diabetes Mellitus Experimental	ftp://ftp.rgd.mcw.edu/pub/data_release	RPE65 CP CAT PAX6 ALDOB
0.00252436	5	351	9.18588	Regulation of cell projection organization	http://amigo.geneontology.org/amigo/term/GO:0031344	ACTR2 NEFL VIM ACTR3 ARPC2
0.00272843	2	14	92.1212	DOID:0080199 colorectal carcinoma	ftp://ftp.rgd.mcw.edu/pub/data_release	ACTR2 ACTR3
0.00312184	2	15	85.9798	Mesodermal cell fate commitment	http://amigo.geneontology.org/amigo/term/GO:0001710	POU5F1 NANOG
0.00352155	3	82	23.592	DOID:9351 diabetes mellitus	ftp://ftp.rgd.mcw.edu/pub/data_release	CP CAT ALDOB
0.00352155	2	16	80.6061	Tricarboxylic acid cycle	http://amigo.geneontology.org/amigo/term/GO:0006099	ACO2 MDH2
0.00391333	6	610	6.34277	Organophosphate metabolic process	http://amigo.geneontology.org/amigo/term/GO:0019637	GPHN DPYD ACLY TKT RRM2 ALDOB
0.00391955	2	17	75.8645	PW:0000026 citric acid cycle pathway	ftp://ftp.rgd.mcw.edu/pub/data_release	ACLY CS
0.00437375	2	18	71.6498	2-Oxocarboxylic acid metabolism	http://www.genome.jp/kegg-bin/show_pathway?ssc01210	ACO2 CS
0.00467778	4	223	11.5668	Establishment of organelle localization	http://amigo.geneontology.org/amigo/term/GO:0051656	ACTR2 NEFL PAX6 ACTR3
0.00468287	3	92	21.0277	DOID:13580 cholestasis	ftp://ftp.rgd.mcw.edu/pub/data_release	ALB CP CAT
0.00468287	3	92	21.0277	DOID:3021 acute kidney failure	ftp://ftp.rgd.mcw.edu/pub/data_release	NES ALB CP
0.00468287	2	19	67.8788	DOID:9002775 Cognitive Dysfunction	ftp://ftp.rgd.mcw.edu/pub/data_release	DPYD ACTR3
0.00468287	2	19	67.8788	DOID:9003657 Perennial Allergic Rhinitis	ftp://ftp.rgd.mcw.edu/pub/data_release	ALB CAT
0.00468287	2	19	67.8788	DOID:3454 brain infarction	ftp://ftp.rgd.mcw.edu/pub/data_release	NES VIM
0.00505972	3	95	20.3636	Regulation of cell division	http://amigo.geneontology.org/amigo/term/GO:0051302	POU5F1 PAX6 NANOG
0.0051279	2	20	64.4848	PW:0000045 pentose phosphate pathway	ftp://ftp.rgd.mcw.edu/pub/data_release	TKT ALDOB
0.00554969	2	21	61.4141	DOID:9001686 Acute Coronary Syndrome	ftp://ftp.rgd.mcw.edu/pub/data_release	ALB VIM
0.00554969	2	21	61.4141	DOID:936 brain disease	ftp://ftp.rgd.mcw.edu/pub/data_release	ALB CP
0.00554969	2	21	61.4141	Intermediate filament organization	http://amigo.geneontology.org/amigo/term/GO:0045109	NEFL VIM
0.00585429	3	101	19.1539	Aerobic respiration	http://amigo.geneontology.org/amigo/term/GO:0009060	ACO2 CAT MDH2
0.00633529	3	104	18.6014	PW:0000297 platelet-derived growth factor signaling pathway	ftp://ftp.rgd.mcw.edu/pub/data_release	ACTR2 ARPC4 ACTR3
0.0065431	2	23	56.0738	DOID:655 inherited metabolic disorder	ftp://ftp.rgd.mcw.edu/pub/data_release	SUOX GPHN
0.00703958	2	24	53.7374	DOID:13241 Behcet's disease	ftp://ftp.rgd.mcw.edu/pub/data_release	VIM CAT
0.00703958	2	24	53.7374	Cell fate commitment involved in formation of primary germ layer	http://amigo.geneontology.org/amigo/term/GO:0060795	POU5F1 NANOG
0.00707998	3	109	17.7481	DOID:5082 liver cirrhosis	ftp://ftp.rgd.mcw.edu/pub/data_release	ALB VIM CP
0.0072248	3	110	17.5868	Cytokinesis	http://amigo.geneontology.org/amigo/term/GO:0000910	ACTR2 ACTR3 STMN1
0.00750007	2	25	51.5879	PW:0000738 fatty acid beta degradation pathway	ftp://ftp.rgd.mcw.edu/pub/data_release	ETFA ETFB
0.00783039	5	468	6.88941	Cellular response to cytokine stimulus	http://amigo.geneontology.org/amigo/term/GO:0071345	POU5F1 ACTR2 VIM PAX6 ACTR3
0.00796688	2	26	49.6037	DOID:5679 retinal disease	ftp://ftp.rgd.mcw.edu/pub/data_release	VIM CAT
0.00796688	2	26	49.6037	Mesodermal cell differentiation	http://amigo.geneontology.org/amigo/term/GO:0048333	POU5F1 NANOG
0.00854316	2	27	47.7666	Pyruvate metabolism and Citric Acid (TCA) cycle	https://reactome.org/download/current	ACO2 CS
0.00908	2	28	46.0606	Pentose phosphate pathway	http://www.genome.jp/kegg-bin/show_pathway?ssc00030	TKT ALDOB
0.00908	2	28	46.0606	Mitochondrion localization	http://amigo.geneontology.org/amigo/term/GO:0051646	ALB NEFL
0.00928893	3	122	15.8569	Regulation of plasma membrane bounded cell projection assembly	http://amigo.geneontology.org/amigo/term/GO:0120032	ACTR2 ACTR3 ARPC2
0.00945418	3	123	15.728	Intermediate filament cytoskeleton	http://amigo.geneontology.org/amigo/term/GO:0045111	NES NEFL VIM
0.00946886	4	282	9.14679	DOID:9352 type 2 diabetes mellitus	ftp://ftp.rgd.mcw.edu/pub/data_release	CP CAT PAX6 ALDOB
0.00950758	2	29	44.4723	Deoxyribonucleotide metabolic process	http://amigo.geneontology.org/amigo/term/GO:0009262	DPYD RRM2
0.00950758	3	124	15.6012	Regulation of cell projection assembly	http://amigo.geneontology.org/amigo/term/GO:0060491	ACTR2 ACTR3 ARPC2
0.0103005	3	128	15.1136	Establishment or maintenance of cell polarity	http://amigo.geneontology.org/amigo/term/GO:0007163	ACTR2 PAX6 ACTR3
0.0103005	3	128	15.1136	Cellular respiration	http://amigo.geneontology.org/amigo/term/GO:0045333	ACO2 CAT MDH2
0.010383	8	1389	3.71403	Identical protein binding	http://amigo.geneontology.org/amigo/term/GO:0042802	GPHN DPYD ALB NEFL VIM CAT TKT ALDOB
0.0113442	5	518	6.22441	Response to cytokine	http://amigo.geneontology.org/amigo/term/GO:0034097	POU5F1 ACTR2 VIM PAX6 ACTR3
0.0114888	3	134	14.4369	Signaling pathways regulating pluripotency of stem cells	http://www.genome.jp/kegg-bin/show_pathway?ssc04550	POU5F1 PAX6 NANOG
0.0114888	3	134	14.4369	DOID:10584 retinitis pigmentosa	ftp://ftp.rgd.mcw.edu/pub/data_release	GPHN RPE65 CAT
0.0116347	3	135	14.33	Protein-macromolecule adaptor activity	http://amigo.geneontology.org/amigo/term/GO:0030674	NEFL ARPC4 NANOG
0.0116347	2	33	39.0817	DOID:9001542 Albuminuria	ftp://ftp.rgd.mcw.edu/pub/data_release	ALB CP
0.0116347	4	303	8.51285	Nucleotide metabolic process	http://amigo.geneontology.org/amigo/term/GO:0009117	DPYD ACLY RRM2 ALDOB
0.0122812	2	34	37.9323	DOID:1312 focal segmental glomerulosclerosis	ftp://ftp.rgd.mcw.edu/pub/data_release	CAT ACTR3
0.0124049	4	310	8.32063	Nucleoside phosphate metabolic process	http://amigo.geneontology.org/amigo/term/GO:0006753	DPYD ACLY RRM2 ALDOB
0.0124049	3	139	13.9176	Lyase activity	http://amigo.geneontology.org/amigo/term/GO:0016829	ACO2 CA2 ALDOB
0.0125688	8	1443	3.57504	Cellular response to organic substance	http://amigo.geneontology.org/amigo/term/GO:0071310	POU5F1 RPE65 CA2 ACTR2 VIM PAX6 ACTR3 NANOG
0.0128734	9	1813	3.20112	Cellular response to chemical stimulus	http://amigo.geneontology.org/amigo/term/GO:0070887	POU5F1 RPE65 CA2 ACTR2 VIM PAX6 ACTR3 KLF2 NANOG
0.012914	3	142	13.6236	Cell projection membrane	http://amigo.geneontology.org/amigo/term/GO:0031253	ARPC1A ARPC2 LIMA1
0.0133708	3	144	13.4343	DOID:9000998 Brain Injuries	ftp://ftp.rgd.mcw.edu/pub/data_release	ACTR2 ALB VIM
0.0135373	4	320	8.06061	DOID:1909 melanoma	ftp://ftp.rgd.mcw.edu/pub/data_release	DPYD CP CAT PAX6
0.0135373	6	820	4.7184	Response to oxygen-containing compound	http://amigo.geneontology.org/amigo/term/GO:1901700	POU5F1 RPE65 CA2 VIM CAT NANOG
0.0137349	4	322	8.01054	Organophosphate biosynthetic process	http://amigo.geneontology.org/amigo/term/GO:0090407	GPHN ACLY TKT RRM2
0.0152937	2	39	33.0692	DOID:10591 pre-eclampsia	ftp://ftp.rgd.mcw.edu/pub/data_release	ALB CP
0.0159155	2	40	32.2424	DOID:1289 neurodegenerative disease	ftp://ftp.rgd.mcw.edu/pub/data_release	VIM CAT
0.0159155	2	40	32.2424	Cellular aldehyde metabolic process	http://amigo.geneontology.org/amigo/term/GO:0006081	RPE65 TKT
0.0166289	2	41	31.456	Intermediate filament cytoskeleton organization	http://amigo.geneontology.org/amigo/term/GO:0045104	NEFL VIM
0.0170168	6	863	4.4833	Positive regulation of transcription by RNA polymerase II	http://amigo.geneontology.org/amigo/term/GO:0045944	POU5F1 ACTR2 PAX6 ACTR3 KLF2 NANOG
0.0170503	3	160	12.0909	DOID:7148 rheumatoid arthritis	ftp://ftp.rgd.mcw.edu/pub/data_release	VIM CP CAT
0.0170503	2	42	30.7071	DOID:8466 retinal degeneration	ftp://ftp.rgd.mcw.edu/pub/data_release	RPE65 CP
0.0170503	2	42	30.7071	Intermediate filament-based process	http://amigo.geneontology.org/amigo/term/GO:0045103	NEFL VIM
0.0170503	4	346	7.4549	Nucleobase-containing small molecule metabolic process	http://amigo.geneontology.org/amigo/term/GO:0055086	DPYD ACLY RRM2 ALDOB
0.0175492	2	43	29.993	Fatty acid beta-oxidation	http://amigo.geneontology.org/amigo/term/GO:0006635	ETFA ETFB
0.0175492	2	43	29.993	DOID:9006024 Hypotension	ftp://ftp.rgd.mcw.edu/pub/data_release	ALB CAT
0.0175492	2	43	29.993	DOID:14791 Leber congenital amaurosis	ftp://ftp.rgd.mcw.edu/pub/data_release	GPHN RPE65
0.0181341	8	1552	3.32396	Immune System	https://reactome.org/download/current	ARPC1A ACTR2 ARPC3 ARPC4 ARPC5 ACTR3 ARPC2 ACLY
0.0190136	2	45	28.6599	Dicarboxylic acid metabolic process	http://amigo.geneontology.org/amigo/term/GO:0043648	ACLY MDH2
0.0192549	3	169	11.447	Cellular response to peptide	http://amigo.geneontology.org/amigo/term/GO:1901653	RPE65 CA2 VIM
0.0193812	2	46	28.0369	Hydro-lyase activity	http://amigo.geneontology.org/amigo/term/GO:0016836	ACO2 CA2
0.0193812	3	170	11.3797	Molecular adaptor activity	http://amigo.geneontology.org/amigo/term/GO:0060090	NEFL ARPC4 NANOG
0.0193812	3	170	11.3797	DOID:1793 pancreatic cancer	ftp://ftp.rgd.mcw.edu/pub/data_release	DPYD ALB CAT
0.0193812	2	46	28.0369	DOID:9006810 Drug-Related Side Effects and Adverse Reactions	ftp://ftp.rgd.mcw.edu/pub/data_release	ALB CP
0.0198598	7	1228	3.67585	Positive regulation of macromolecule biosynthetic process	http://amigo.geneontology.org/amigo/term/GO:0010557	POU5F1 ACTR2 VIM PAX6 ACTR3 KLF2 NANOG
0.0199886	3	173	11.1823	Cell fate commitment	http://amigo.geneontology.org/amigo/term/GO:0045165	POU5F1 PAX6 NANOG
0.0204985	2	48	26.8687	Iron-sulfur cluster binding	http://amigo.geneontology.org/amigo/term/GO:0051536	ACO2 DPYD
0.0204985	2	48	26.8687	Metal cluster binding	http://amigo.geneontology.org/amigo/term/GO:0051540	ACO2 DPYD
0.0204985	4	372	6.93385	DOID:9008939 Breast Neoplasms	ftp://ftp.rgd.mcw.edu/pub/data_release	DPYD VIM CAT STMN1
0.0204985	3	176	10.9917	DOID:9000965 Neoplasm Metastasis	ftp://ftp.rgd.mcw.edu/pub/data_release	DPYD VIM CAT
0.0204985	2	48	26.8687	Astrocyte differentiation	http://amigo.geneontology.org/amigo/term/GO:0048708	VIM PAX6
0.0207336	3	177	10.9296	Positive regulation of cell development	http://amigo.geneontology.org/amigo/term/GO:0010720	NEFL PAX6 ARPC2
0.0209505	2	49	26.3203	Lens development in camera-type eye	http://amigo.geneontology.org/amigo/term/GO:0002088	VIM PAX6
0.0209505	2	49	26.3203	Response to retinoic acid	http://amigo.geneontology.org/amigo/term/GO:0032526	POU5F1 NANOG
0.0209851	5	628	5.13414	Microtubule-based process	http://amigo.geneontology.org/amigo/term/GO:0007017	ACTR2 NEFL PAX6 ACTR3 STMN1
0.0214896	5	633	5.09359	Cell morphogenesis	http://amigo.geneontology.org/amigo/term/GO:0000902	NEFL PAX6 ARPC2 STMN1 KLF2
0.0214896	2	50	25.7939	DOID:114 heart disease	ftp://ftp.rgd.mcw.edu/pub/data_release	ALB CP
0.0214896	3	181	10.6881	Energy derivation by oxidation of organic compounds	http://amigo.geneontology.org/amigo/term/GO:0015980	ACO2 CAT MDH2
0.0216761	6	931	4.15584	Cell cycle	http://amigo.geneontology.org/amigo/term/GO:0007049	NES ACTR2 PAX6 ACTR3 STMN1 NANOG
0.0229233	2	52	24.8019	Pyrimidine metabolism	http://www.genome.jp/kegg-bin/show_pathway?ssc00240	DPYD RRM2
0.0234847	2	53	24.3339	DOID:9004610 Acute Lung Injury	ftp://ftp.rgd.mcw.edu/pub/data_release	ALB CAT
0.0234847	2	53	24.3339	PW:0000958 forkhead class A signaling pathway	ftp://ftp.rgd.mcw.edu/pub/data_release	ALB ALDOB
0.0234847	7	1283	3.51827	Positive regulation of cellular biosynthetic process	http://amigo.geneontology.org/amigo/term/GO:0031328	POU5F1 ACTR2 VIM PAX6 ACTR3 KLF2 NANOG
0.0241516	2	54	23.8833	Carbon-oxygen lyase activity	http://amigo.geneontology.org/amigo/term/GO:0016835	ACO2 CA2
0.0241516	5	655	4.92251	Carbohydrate derivative metabolic process	http://amigo.geneontology.org/amigo/term/GO:1901135	DPYD ACLY TKT RRM2 ALDOB
0.0249299	2	55	23.449	Drug metabolism	http://www.genome.jp/kegg-bin/show_pathway?ssc00983	DPYD RRM2
0.0249738	7	1302	3.46693	Positive regulation of biosynthetic process	http://amigo.geneontology.org/amigo/term/GO:0009891	POU5F1 ACTR2 VIM PAX6 ACTR3 KLF2 NANOG
0.0254957	2	56	23.0303	Fatty acid catabolic process	http://amigo.geneontology.org/amigo/term/GO:0009062	ETFA ETFB
0.0254957	2	56	23.0303	Mesoderm formation	http://amigo.geneontology.org/amigo/term/GO:0001707	POU5F1 NANOG
0.0271969	2	58	22.2362	Mesoderm morphogenesis	http://amigo.geneontology.org/amigo/term/GO:0048332	POU5F1 NANOG
0.0275398	1	3	214.949	Pyrimidine nucleobase catabolic process	http://amigo.geneontology.org/amigo/term/GO:0006208	DPYD
0.0275398	1	3	214.949	CMP catabolic process	http://amigo.geneontology.org/amigo/term/GO:0006248	DPYD
0.0275398	1	3	214.949	Negative regulation of guanyl-nucleotide exchange factor activity	http://amigo.geneontology.org/amigo/term/GO:1905098	STMN1
0.0275398	4	437	5.9025	Cell morphogenesis involved in differentiation	http://amigo.geneontology.org/amigo/term/GO:0000904	NEFL PAX6 ARPC2 STMN1
0.0275398	2	61	21.1426	Brush border	http://amigo.geneontology.org/amigo/term/GO:0005903	ACTR3 LIMA1
0.0275398	1	3	214.949	Actin cap	http://amigo.geneontology.org/amigo/term/GO:0030478	ACTR2
0.0275398	1	3	214.949	Peroxisome targeting sequence binding	http://amigo.geneontology.org/amigo/term/GO:0000268	CAT
0.0275398	1	3	214.949	Catalase activity	http://amigo.geneontology.org/amigo/term/GO:0004096	CAT
0.0275398	1	3	214.949	Fructose-bisphosphate aldolase activity	http://amigo.geneontology.org/amigo/term/GO:0004332	ALDOB
0.0275398	7	1353	3.33624	Movement of cell or subcellular component	http://amigo.geneontology.org/amigo/term/GO:0006928	ACTR2 NEFL PAX6 ARPC5 ACTR3 STMN1 LIMA1
0.0275398	1	3	214.949	Structural constituent of postsynaptic intermediate filament cytoskeleton	http://amigo.geneontology.org/amigo/term/GO:0099184	NEFL
0.0275398	2	60	21.4949	Respiratory electron transport	https://reactome.org/download/current	ETFA ETFB
0.0275398	2	63	20.4714	DOID:9001586 Experimental Liver Neoplasms	ftp://ftp.rgd.mcw.edu/pub/data_release	VIM CP
0.0275398	1	3	214.949	DOID:0110330 Leber congenital amaurosis 13	ftp://ftp.rgd.mcw.edu/pub/data_release	GPHN
0.0275398	2	61	21.1426	DOID:3587 pancreatic ductal carcinoma	ftp://ftp.rgd.mcw.edu/pub/data_release	ALB PAX6
0.0275398	1	3	214.949	DOID:9005647 Experimental Autoimmune Uveitis	ftp://ftp.rgd.mcw.edu/pub/data_release	RPE65
0.0275398	1	3	214.949	DOID:0050711 aceruloplasminemia	ftp://ftp.rgd.mcw.edu/pub/data_release	CP
0.0275398	1	3	214.949	DOID:9003010 Ehlers-Danlos Syndrome Type VII Autosomal Dominant	ftp://ftp.rgd.mcw.edu/pub/data_release	ALB
0.0275398	1	3	214.949	DOID:9649 congenital nystagmus	ftp://ftp.rgd.mcw.edu/pub/data_release	PAX6
0.0275398	1	3	214.949	Ectodermal cell fate commitment	http://amigo.geneontology.org/amigo/term/GO:0001712	POU5F1
0.0275398	1	3	214.949	DOID:11975 coloboma of optic nerve	ftp://ftp.rgd.mcw.edu/pub/data_release	PAX6
0.0275398	1	3	214.949	DOID:1229 paranoid schizophrenia	ftp://ftp.rgd.mcw.edu/pub/data_release	PAX6
0.0275398	1	3	214.949	DOID:14515 WAGR syndrome	ftp://ftp.rgd.mcw.edu/pub/data_release	PAX6
0.0275398	1	3	214.949	DOID:1891 optic nerve disease	ftp://ftp.rgd.mcw.edu/pub/data_release	PAX6
0.0275398	1	3	214.949	DOID:9001923 Foveal Hypoplasia	ftp://ftp.rgd.mcw.edu/pub/data_release	PAX6
0.0275398	1	3	214.949	DOID:0050782 Zollinger-Ellison syndrome	ftp://ftp.rgd.mcw.edu/pub/data_release	ALB
0.0275398	1	3	214.949	DOID:9004989 Protein Deficiency	ftp://ftp.rgd.mcw.edu/pub/data_release	CAT
0.0275398	1	3	214.949	DOID:1579 respiratory system disease	ftp://ftp.rgd.mcw.edu/pub/data_release	ALB
0.0275398	8	1743	2.95972	Response to organic substance	http://amigo.geneontology.org/amigo/term/GO:0010033	POU5F1 RPE65 CA2 ACTR2 VIM PAX6 ACTR3 NANOG
0.0275398	1	3	214.949	DOID:9869 hereditary fructose intolerance syndrome	ftp://ftp.rgd.mcw.edu/pub/data_release	ALDOB
0.0275398	1	3	214.949	DOID:0080150 adrenocorticotropic hormone deficiency	ftp://ftp.rgd.mcw.edu/pub/data_release	RPE65
0.0275398	1	3	214.949	DOID:0111164 molybdenum cofactor deficiency type A	ftp://ftp.rgd.mcw.edu/pub/data_release	GPHN
0.0275398	1	3	214.949	DOID:9003576 Prognathism	ftp://ftp.rgd.mcw.edu/pub/data_release	DPYD
0.0275398	1	3	214.949	DOID:9007271 Hypoalbuminemia	ftp://ftp.rgd.mcw.edu/pub/data_release	ALB
0.0275398	1	3	214.949	DOID:591 phobic disorder	ftp://ftp.rgd.mcw.edu/pub/data_release	CAT
0.0275398	1	3	214.949	DOID:11506 suppurative otitis media	ftp://ftp.rgd.mcw.edu/pub/data_release	ALB
0.0275398	1	3	214.949	PW:0002632 iron efflux pathway	ftp://ftp.rgd.mcw.edu/pub/data_release	CP
0.0275398	1	3	214.949	PW:0000427 molybdenum cofactor biosynthetic pathway	ftp://ftp.rgd.mcw.edu/pub/data_release	GPHN
0.0275398	1	3	214.949	PW:0000456 Inhibitory synaptic transmission pathway	ftp://ftp.rgd.mcw.edu/pub/data_release	GPHN
0.0275398	1	3	214.949	PW:0001516 organophosphate response pathway	ftp://ftp.rgd.mcw.edu/pub/data_release	ALB
0.0275398	1	3	214.949	Tetraterpenoid metabolic process	http://amigo.geneontology.org/amigo/term/GO:0016108	RPE65
0.0275398	1	3	214.949	Carotenoid metabolic process	http://amigo.geneontology.org/amigo/term/GO:0016116	RPE65
0.0275398	2	60	21.4949	Fatty acid oxidation	http://amigo.geneontology.org/amigo/term/GO:0019395	ETFA ETFB
0.0275398	1	3	214.949	Epithalamus development	http://amigo.geneontology.org/amigo/term/GO:0021538	PAX6
0.0275398	1	3	214.949	Oligodendrocyte cell fate specification	http://amigo.geneontology.org/amigo/term/GO:0021778	PAX6
0.0275398	1	3	214.949	Oligodendrocyte cell fate commitment	http://amigo.geneontology.org/amigo/term/GO:0021779	PAX6
0.0275398	1	3	214.949	Glial cell fate specification	http://amigo.geneontology.org/amigo/term/GO:0021780	PAX6
0.0275398	1	3	214.949	Habenula development	http://amigo.geneontology.org/amigo/term/GO:0021986	PAX6
0.0275398	1	3	214.949	Neurofilament bundle assembly	http://amigo.geneontology.org/amigo/term/GO:0033693	NEFL
0.0275398	2	62	20.8016	Lipid oxidation	http://amigo.geneontology.org/amigo/term/GO:0034440	ETFA ETFB
0.0275398	3	203	9.52978	Small molecule catabolic process	http://amigo.geneontology.org/amigo/term/GO:0044282	ETFA ETFB DPYD
0.0275398	2	60	21.4949	Meiotic chromosome segregation	http://amigo.geneontology.org/amigo/term/GO:0045132	ACTR2 ACTR3
0.0275398	1	3	214.949	Negative regulation of calcium ion-dependent exocytosis	http://amigo.geneontology.org/amigo/term/GO:0045955	POU5F1
0.0275398	1	3	214.949	CMP metabolic process	http://amigo.geneontology.org/amigo/term/GO:0046035	DPYD
0.0275398	1	3	214.949	Deoxyribonucleoside catabolic process	http://amigo.geneontology.org/amigo/term/GO:0046121	DPYD
0.0275398	2	63	20.4714	Chromosome localization	http://amigo.geneontology.org/amigo/term/GO:0050000	ACTR2 ACTR3
0.0275398	2	61	21.1426	Establishment of chromosome localization	http://amigo.geneontology.org/amigo/term/GO:0051303	ACTR2 ACTR3
0.0275398	1	3	214.949	Regulation of thrombin-activated receptor signaling pathway	http://amigo.geneontology.org/amigo/term/GO:0070494	STMN1
0.0275398	1	3	214.949	Negative regulation of thrombin-activated receptor signaling pathway	http://amigo.geneontology.org/amigo/term/GO:0070495	STMN1
0.0275398	3	207	9.34563	Response to peptide	http://amigo.geneontology.org/amigo/term/GO:1901652	RPE65 CA2 VIM
0.0275914	2	66	19.5409	Chaperone binding	http://amigo.geneontology.org/amigo/term/GO:0051087	ALB CP
0.0275914	8	1766	2.92117	Anatomical structure morphogenesis	http://amigo.geneontology.org/amigo/term/GO:0009653	POU5F1 RPE65 NEFL PAX6 ARPC2 STMN1 KLF2 NANOG
0.0275914	2	66	19.5409	Monocarboxylic acid catabolic process	http://amigo.geneontology.org/amigo/term/GO:0072329	ETFA ETFB
0.0282229	2	67	19.2492	DOID:9007608 Neoplastic Cell Transformation	ftp://ftp.rgd.mcw.edu/pub/data_release	VIM CAT
0.0282229	2	67	19.2492	Protein depolymerization	http://amigo.geneontology.org/amigo/term/GO:0051261	STMN1 LIMA1
0.0299719	5	735	4.38672	Cell cycle process	http://amigo.geneontology.org/amigo/term/GO:0022402	NES ACTR2 PAX6 ACTR3 STMN1
0.0302579	3	228	8.48485	Camera-type eye development	http://amigo.geneontology.org/amigo/term/GO:0043010	RPE65 VIM PAX6
0.0321306	6	1096	3.53019	Positive regulation of nucleic acid-templated transcription	http://amigo.geneontology.org/amigo/term/GO:1903508	POU5F1 ACTR2 PAX6 ACTR3 KLF2 NANOG
0.0321306	1	4	161.212	Molybdenum ion binding	http://amigo.geneontology.org/amigo/term/GO:0030151	SUOX
0.0321306	1	4	161.212	Molybdopterin cofactor binding	http://amigo.geneontology.org/amigo/term/GO:0043546	GPHN
0.0321306	1	4	161.212	Fructose binding	http://amigo.geneontology.org/amigo/term/GO:0070061	ALDOB
0.0321306	1	4	161.212	Sulfide oxidation to sulfate	https://reactome.org/download/current	SUOX
0.0321306	1	4	161.212	Fructose metabolism	https://reactome.org/download/current	ALDOB
0.0321306	1	4	161.212	Fructose catabolism	https://reactome.org/download/current	ALDOB
0.0321306	2	74	17.4283	DOID:8501 fundus dystrophy	ftp://ftp.rgd.mcw.edu/pub/data_release	GPHN RPE65
0.0321306	1	4	161.212	DOID:9007614 Paroxysmal Atrial Fibrillation	ftp://ftp.rgd.mcw.edu/pub/data_release	ALB
0.0321306	1	4	161.212	DOID:9000722 Animal Hepatitis	ftp://ftp.rgd.mcw.edu/pub/data_release	CP
0.0321306	1	4	161.212	Deoxyribonucleoside metabolic process	http://amigo.geneontology.org/amigo/term/GO:0009120	DPYD
0.0321306	1	4	161.212	DOID:12140 Chagas disease	ftp://ftp.rgd.mcw.edu/pub/data_release	VIM
0.0321306	1	4	161.212	DOID:9006008 Head Injuries Closed	ftp://ftp.rgd.mcw.edu/pub/data_release	VIM
0.0321306	1	4	161.212	Ectoderm formation	http://amigo.geneontology.org/amigo/term/GO:0001705	POU5F1
0.0321306	1	4	161.212	DOID:3491 Turner syndrome	ftp://ftp.rgd.mcw.edu/pub/data_release	CAT
0.0321306	1	4	161.212	Pyrimidine ribonucleoside monophosphate catabolic process	http://amigo.geneontology.org/amigo/term/GO:0009175	DPYD
0.0321306	1	4	161.212	DOID:9007787 Carcinoid Tumor	ftp://ftp.rgd.mcw.edu/pub/data_release	ALB
0.0321306	3	237	8.16264	Ribonucleotide metabolic process	http://amigo.geneontology.org/amigo/term/GO:0009259	DPYD ACLY ALDOB
0.0321306	1	4	161.212	DOID:0110120 Axenfeld-Rieger syndrome type 1	ftp://ftp.rgd.mcw.edu/pub/data_release	PAX6
0.0321306	1	4	161.212	DOID:9007828 Abnormalities Drug-Induced	ftp://ftp.rgd.mcw.edu/pub/data_release	CAT
0.0321306	1	4	161.212	DOID:1063 interstitial nephritis	ftp://ftp.rgd.mcw.edu/pub/data_release	ALB
0.0321306	1	4	161.212	DOID:13208 background diabetic retinopathy	ftp://ftp.rgd.mcw.edu/pub/data_release	CAT
0.0321306	1	4	161.212	DOID:653 purine-pyrimidine metabolic disorder	ftp://ftp.rgd.mcw.edu/pub/data_release	DPYD
0.0321306	1	4	161.212	DOID:161 keratosis	ftp://ftp.rgd.mcw.edu/pub/data_release	CAT
0.0321306	1	4	161.212	DOID:9004593 Drug-Induced Immune Thrombocytopenia	ftp://ftp.rgd.mcw.edu/pub/data_release	DPYD
0.0321306	1	4	161.212	DOID:0060695 hyperekplexia	ftp://ftp.rgd.mcw.edu/pub/data_release	GPHN
0.0321306	1	4	161.212	PW:0000461 cyclooxygenase mediated pathway of arachidonic acid metabolism	ftp://ftp.rgd.mcw.edu/pub/data_release	VIM
0.0321306	1	4	161.212	PW:0000029 fatty acid biosynthetic pathway	ftp://ftp.rgd.mcw.edu/pub/data_release	ACLY
0.0321306	1	4	161.212	PW:0001647 sulfite oxidase deficiency pathway	ftp://ftp.rgd.mcw.edu/pub/data_release	SUOX
0.0321306	3	238	8.12834	Ribose phosphate metabolic process	http://amigo.geneontology.org/amigo/term/GO:0019693	DPYD ACLY ALDOB
0.0321306	1	4	161.212	Germ-line stem cell population maintenance	http://amigo.geneontology.org/amigo/term/GO:0030718	POU5F1
0.0321306	6	1096	3.53019	Positive regulation of transcription, DNA-templated	http://amigo.geneontology.org/amigo/term/GO:0045893	POU5F1 ACTR2 PAX6 ACTR3 KLF2 NANOG
0.0321306	1	4	161.212	UMP catabolic process	http://amigo.geneontology.org/amigo/term/GO:0046050	DPYD
0.0321306	1	4	161.212	Gamma-aminobutyric acid receptor clustering	http://amigo.geneontology.org/amigo/term/GO:0097112	GPHN
0.0321306	6	1097	3.52697	Positive regulation of RNA biosynthetic process	http://amigo.geneontology.org/amigo/term/GO:1902680	POU5F1 ACTR2 PAX6 ACTR3 KLF2 NANOG
0.0328196	2	77	16.7493	DOID:9452 fatty liver disease	ftp://ftp.rgd.mcw.edu/pub/data_release	SUOX CAT
0.034288	3	249	7.76926	Axonogenesis	http://amigo.geneontology.org/amigo/term/GO:0007409	NEFL PAX6 STMN1
0.034288	2	79	16.3253	DOID:783 end stage renal failure	ftp://ftp.rgd.mcw.edu/pub/data_release	ALB CAT
0.0349708	1	5	128.97	Purine nucleobase catabolic process	http://amigo.geneontology.org/amigo/term/GO:0006145	DPYD
0.0349708	1	5	128.97	DCMP catabolic process	http://amigo.geneontology.org/amigo/term/GO:0006249	DPYD
0.0349708	1	5	128.97	Regulation of guanyl-nucleotide exchange factor activity	http://amigo.geneontology.org/amigo/term/GO:1905097	STMN1
0.0349708	2	85	15.1729	Response to leukemia inhibitory factor	http://amigo.geneontology.org/amigo/term/GO:1990823	POU5F1 PAX6
0.0349708	2	84	15.3535	Cellular response to leukemia inhibitory factor	http://amigo.geneontology.org/amigo/term/GO:1990830	POU5F1 PAX6
0.0349708	2	85	15.1729	Peroxisome	http://amigo.geneontology.org/amigo/term/GO:0005777	VIM CAT
0.0349708	2	84	15.3535	Intermediate filament	http://amigo.geneontology.org/amigo/term/GO:0005882	NEFL VIM
0.0349708	2	85	15.1729	Microbody	http://amigo.geneontology.org/amigo/term/GO:0042579	VIM CAT
0.0349708	1	5	128.97	Arylesterase activity	http://amigo.geneontology.org/amigo/term/GO:0004064	CA2
0.0349708	1	5	128.97	Macrolide binding	http://amigo.geneontology.org/amigo/term/GO:0005527	ALB
0.0349708	2	80	16.1212	Electron transfer activity	http://amigo.geneontology.org/amigo/term/GO:0009055	ETFA ETFB
0.0349708	1	5	128.97	Mo-molybdopterin cofactor biosynthetic process	http://amigo.geneontology.org/amigo/term/GO:0006777	GPHN
0.0349708	1	5	128.97	Toxic substance binding	http://amigo.geneontology.org/amigo/term/GO:0015643	ALB
0.0349708	3	263	7.35569	Microtubule-based movement	http://amigo.geneontology.org/amigo/term/GO:0007018	ACTR2 NEFL ACTR3
0.0349708	1	5	128.97	Keratin filament binding	http://amigo.geneontology.org/amigo/term/GO:1990254	VIM
0.0349708	1	5	128.97	Molybdenum cofactor biosynthesis	https://reactome.org/download/current	GPHN
0.0349708	3	257	7.52741	Eye development	http://amigo.geneontology.org/amigo/term/GO:0001654	RPE65 VIM PAX6
0.0349708	1	5	128.97	Caspase-mediated cleavage of cytoskeletal proteins	https://reactome.org/download/current	VIM
0.0349708	3	263	7.35569	DOID:1826 epilepsy	ftp://ftp.rgd.mcw.edu/pub/data_release	DPYD ALB CP
0.0349708	1	5	128.97	DOID:9637 stomatitis	ftp://ftp.rgd.mcw.edu/pub/data_release	CAT
0.0349708	1	5	128.97	DOID:9182 pemphigus	ftp://ftp.rgd.mcw.edu/pub/data_release	CAT
0.0349708	1	5	128.97	DOID:9004673 Hearing Loss Cisplatin-Induced	ftp://ftp.rgd.mcw.edu/pub/data_release	CAT
0.0349708	1	5	128.97	DOID:9001036 Head Injuries Penetrating	ftp://ftp.rgd.mcw.edu/pub/data_release	VIM
0.0349708	1	5	128.97	Pyrimidine ribonucleoside monophosphate metabolic process	http://amigo.geneontology.org/amigo/term/GO:0009173	DPYD
0.0349708	1	5	128.97	DOID:9002049 Anophthalmia	ftp://ftp.rgd.mcw.edu/pub/data_release	PAX6
0.0349708	1	5	128.97	DOID:2987 familial Mediterranean fever	ftp://ftp.rgd.mcw.edu/pub/data_release	CAT
0.0349708	1	5	128.97	DOID:1210 optic neuritis	ftp://ftp.rgd.mcw.edu/pub/data_release	CAT
0.0349708	1	5	128.97	DOID:9002455 Aniridia 1	ftp://ftp.rgd.mcw.edu/pub/data_release	PAX6
0.0349708	7	1492	3.02543	Response to external stimulus	http://amigo.geneontology.org/amigo/term/GO:0009605	RPE65 ACTR2 ALB VIM PAX6 ACTR3 STMN1
0.0349708	1	5	128.97	Ectodermal cell differentiation	http://amigo.geneontology.org/amigo/term/GO:0010668	POU5F1
0.0349708	1	5	128.97	Mo-molybdopterin cofactor metabolic process	http://amigo.geneontology.org/amigo/term/GO:0019720	GPHN
0.0349708	1	5	128.97	Molybdopterin cofactor metabolic process	http://amigo.geneontology.org/amigo/term/GO:0043545	GPHN
0.0349708	2	82	15.728	Cellular protein complex disassembly	http://amigo.geneontology.org/amigo/term/GO:0043624	STMN1 LIMA1
0.0349708	1	5	128.97	Dedifferentiation	http://amigo.geneontology.org/amigo/term/GO:0043696	NANOG
0.0349708	1	5	128.97	Cell dedifferentiation	http://amigo.geneontology.org/amigo/term/GO:0043697	NANOG
0.0349708	1	5	128.97	UMP metabolic process	http://amigo.geneontology.org/amigo/term/GO:0046049	DPYD
0.0349708	1	5	128.97	DCMP metabolic process	http://amigo.geneontology.org/amigo/term/GO:0046063	DPYD
0.0349708	1	5	128.97	DUMP catabolic process	http://amigo.geneontology.org/amigo/term/GO:0046079	DPYD
0.0349708	1	5	128.97	Positive regulation of retinoic acid receptor signaling pathway	http://amigo.geneontology.org/amigo/term/GO:0048386	KLF2
0.0349708	3	256	7.55682	Regulation of binding	http://amigo.geneontology.org/amigo/term/GO:0051098	NES PAX6 STMN1
0.0349708	1	5	128.97	Prosthetic group metabolic process	http://amigo.geneontology.org/amigo/term/GO:0051189	GPHN
0.0349708	1	5	128.97	Type I pneumocyte differentiation	http://amigo.geneontology.org/amigo/term/GO:0060509	KLF2
0.0349708	1	5	128.97	Vacuolar proton-transporting V-type ATPase complex assembly	http://amigo.geneontology.org/amigo/term/GO:0070072	ALDOB
0.0349708	1	5	128.97	Cellular response to laminar fluid shear stress	http://amigo.geneontology.org/amigo/term/GO:0071499	KLF2
0.0349708	3	256	7.55682	Purine-containing compound metabolic process	http://amigo.geneontology.org/amigo/term/GO:0072521	DPYD ACLY ALDOB
0.0349708	3	260	7.44056	Visual system development	http://amigo.geneontology.org/amigo/term/GO:0150063	RPE65 VIM PAX6
0.0349708	1	5	128.97	Oxaloacetate metabolic process	http://amigo.geneontology.org/amigo/term/GO:0006107	ACLY
0.0352444	3	264	7.32782	Sensory system development	http://amigo.geneontology.org/amigo/term/GO:0048880	RPE65 VIM PAX6
0.0352999	2	86	14.9965	Respiratory electron transport ATP synthesis by chemiosmotic coupling and heat production by uncoupling proteins.	https://reactome.org/download/current	ETFA ETFB
0.0360028	2	87	14.8241	Camera-type eye morphogenesis	http://amigo.geneontology.org/amigo/term/GO:0048593	RPE65 PAX6
0.0372279	1	6	107.475	Positive regulation of core promoter binding	http://amigo.geneontology.org/amigo/term/GO:1904798	PAX6
0.0372279	1	6	107.475	Neurofilament	http://amigo.geneontology.org/amigo/term/GO:0005883	NEFL
0.0372279	1	6	107.475	Cholinergic synapse	http://amigo.geneontology.org/amigo/term/GO:0098981	NEFL
0.0372279	1	6	107.475	Postsynaptic cytoskeleton	http://amigo.geneontology.org/amigo/term/GO:0099571	NEFL
0.0372279	1	6	107.475	Malate dehydrogenase activity	http://amigo.geneontology.org/amigo/term/GO:0016615	MDH2
0.0372279	1	6	107.475	Oxidoreductase activity, acting on other nitrogenous compounds as donors	http://amigo.geneontology.org/amigo/term/GO:0016661	GPHN
0.0372279	2	92	14.0184	Carboxylic ester hydrolase activity	http://amigo.geneontology.org/amigo/term/GO:0052689	RPE65 CA2
0.0372279	2	91	14.1725	Mesoderm development	http://amigo.geneontology.org/amigo/term/GO:0007498	POU5F1 NANOG
0.0372279	2	91	14.1725	DOID:9000403 Animal Mammary Neoplasms	ftp://ftp.rgd.mcw.edu/pub/data_release	TKT STMN1
0.0372279	1	6	107.475	Retrograde axonal transport	http://amigo.geneontology.org/amigo/term/GO:0008090	NEFL
0.0372279	1	6	107.475	DOID:12554 hemolytic-uremic syndrome	ftp://ftp.rgd.mcw.edu/pub/data_release	ALB
0.0372279	1	6	107.475	DOID:9002605 Delayed Hypersensitivity	ftp://ftp.rgd.mcw.edu/pub/data_release	ALB
0.0372279	1	6	107.475	DOID:9004486 Drug-induced Neutropenia	ftp://ftp.rgd.mcw.edu/pub/data_release	DPYD
0.0372279	1	6	107.475	DOID:1558 angioedema	ftp://ftp.rgd.mcw.edu/pub/data_release	ALB
0.0372279	2	90	14.33	Formation of primary germ layer	http://amigo.geneontology.org/amigo/term/GO:0001704	POU5F1 NANOG
0.0372279	1	6	107.475	DOID:9001834 Peritoneal Neoplasms	ftp://ftp.rgd.mcw.edu/pub/data_release	VIM
0.0372279	1	6	107.475	DOID:9003919 Urination Disorders	ftp://ftp.rgd.mcw.edu/pub/data_release	VIM
0.0372279	1	6	107.475	Pyrimidine nucleoside monophosphate catabolic process	http://amigo.geneontology.org/amigo/term/GO:0009131	DPYD
0.0372279	1	6	107.475	Pyrimidine deoxyribonucleoside monophosphate catabolic process	http://amigo.geneontology.org/amigo/term/GO:0009178	DPYD
0.0372279	1	6	107.475	DOID:9000955 Acute Otitis Media	ftp://ftp.rgd.mcw.edu/pub/data_release	ARPC4
0.0372279	1	6	107.475	Pyrimidine ribonucleotide catabolic process	http://amigo.geneontology.org/amigo/term/GO:0009222	DPYD
0.0372279	1	6	107.475	DOID:9008675 Dyskinesias	ftp://ftp.rgd.mcw.edu/pub/data_release	CP
0.0372279	1	6	107.475	DOID:26 pancreas disease	ftp://ftp.rgd.mcw.edu/pub/data_release	ALB
0.0372279	1	6	107.475	UV protection	http://amigo.geneontology.org/amigo/term/GO:0009650	CAT
0.0372279	1	6	107.475	DOID:13366 Stiff-Person syndrome	ftp://ftp.rgd.mcw.edu/pub/data_release	GPHN
0.0372279	1	6	107.475	PW:0001498 altered retinoid cycle metabolic pathway	ftp://ftp.rgd.mcw.edu/pub/data_release	RPE65
0.0372279	1	6	107.475	PW:0002095 GABA aminotransferase deficiency pathway	ftp://ftp.rgd.mcw.edu/pub/data_release	DPYD
0.0372279	1	6	107.475	PW:0002565 carnosinemia pathway	ftp://ftp.rgd.mcw.edu/pub/data_release	DPYD
0.0372279	1	6	107.475	Axonal transport of mitochondrion	http://amigo.geneontology.org/amigo/term/GO:0019896	NEFL
0.0372279	1	6	107.475	Cerebral cortex regionalization	http://amigo.geneontology.org/amigo/term/GO:0021796	PAX6
0.0372279	1	6	107.475	Commitment of neuronal cell to specific neuron type in forebrain	http://amigo.geneontology.org/amigo/term/GO:0021902	PAX6
0.0372279	1	6	107.475	Fructose 1,6-bisphosphate metabolic process	http://amigo.geneontology.org/amigo/term/GO:0030388	ALDOB
0.0372279	1	6	107.475	Lacrimal gland development	http://amigo.geneontology.org/amigo/term/GO:0032808	PAX6
0.0372279	4	536	4.8123	Mitotic cell cycle	http://amigo.geneontology.org/amigo/term/GO:0000278	NES PAX6 STMN1 NANOG
0.0372279	1	6	107.475	Regulation of development, heterochronic	http://amigo.geneontology.org/amigo/term/GO:0040034	PAX6
0.0372279	1	6	107.475	Erythrocyte maturation	http://amigo.geneontology.org/amigo/term/GO:0043249	KLF2
0.0372279	1	6	107.475	Intermediate filament bundle assembly	http://amigo.geneontology.org/amigo/term/GO:0045110	NEFL
0.0372279	1	6	107.475	DUMP metabolic process	http://amigo.geneontology.org/amigo/term/GO:0046078	DPYD
0.0372279	1	6	107.475	Regulation of timing of cell differentiation	http://amigo.geneontology.org/amigo/term/GO:0048505	PAX6
0.0372279	6	1181	3.27611	Positive regulation of RNA metabolic process	http://amigo.geneontology.org/amigo/term/GO:0051254	POU5F1 ACTR2 PAX6 ACTR3 KLF2 NANOG
0.0372279	3	271	7.13854	Axon development	http://amigo.geneontology.org/amigo/term/GO:0061564	NEFL PAX6 STMN1
0.0372279	1	6	107.475	Proton-transporting V-type ATPase complex assembly	http://amigo.geneontology.org/amigo/term/GO:0070070	ALDOB
0.0372279	1	6	107.475	Cellular response to electrical stimulus	http://amigo.geneontology.org/amigo/term/GO:0071257	RPE65
0.0372279	1	6	107.475	Pancreatic A cell differentiation	http://amigo.geneontology.org/amigo/term/GO:0003310	PAX6
0.0372279	1	6	107.475	Malate metabolic process	http://amigo.geneontology.org/amigo/term/GO:0006108	MDH2
0.0373645	2	94	13.7202	Cluster of actin-based cell projections	http://amigo.geneontology.org/amigo/term/GO:0098862	ACTR3 LIMA1
0.0374742	5	849	3.79769	Lipid metabolic process	http://amigo.geneontology.org/amigo/term/GO:0006629	ETFA ETFB RPE65 CAT ACLY
0.038727	2	96	13.4343	DOID:9004484 Sepsis	ftp://ftp.rgd.mcw.edu/pub/data_release	ALB CAT
0.039414	2	97	13.2958	DOID:305 carcinoma	ftp://ftp.rgd.mcw.edu/pub/data_release	TKT STMN1
0.0395976	4	550	4.68981	Neuron projection development	http://amigo.geneontology.org/amigo/term/GO:0031175	NEFL VIM PAX6 STMN1
0.0402469	1	7	92.1212	Pyrimidine nucleoside metabolic process	http://amigo.geneontology.org/amigo/term/GO:0006213	DPYD
0.0402469	1	7	92.1212	Regulation of core promoter binding	http://amigo.geneontology.org/amigo/term/GO:1904796	PAX6
0.0402469	1	7	92.1212	Regulation of stem cell division	http://amigo.geneontology.org/amigo/term/GO:2000035	NANOG
0.0402469	1	7	92.1212	Aldehyde-lyase activity	http://amigo.geneontology.org/amigo/term/GO:0016832	ALDOB
0.0402469	1	7	92.1212	ChREBP activates metabolic gene expression	https://reactome.org/download/current	ACLY
0.0402469	1	7	92.1212	DOID:6543 acne	ftp://ftp.rgd.mcw.edu/pub/data_release	CAT
0.0402469	1	7	92.1212	DOID:9007355 Hashimoto Disease	ftp://ftp.rgd.mcw.edu/pub/data_release	CAT
0.0402469	1	7	92.1212	DOID:9006832 Nephrosis Puromycin Aminonucleoside	ftp://ftp.rgd.mcw.edu/pub/data_release	ACTR2
0.0402469	1	7	92.1212	DOID:9003049 Femur Head Necrosis	ftp://ftp.rgd.mcw.edu/pub/data_release	CAT
0.0402469	1	7	92.1212	DOID:12716 newborn respiratory distress syndrome	ftp://ftp.rgd.mcw.edu/pub/data_release	CAT
0.0402469	1	7	92.1212	DOID:705 Leber hereditary optic neuropathy	ftp://ftp.rgd.mcw.edu/pub/data_release	RPE65
0.0402469	1	7	92.1212	DOID:9111 cutaneous leishmaniasis	ftp://ftp.rgd.mcw.edu/pub/data_release	CAT
0.0402469	1	7	92.1212	DOID:3121 gallbladder cancer	ftp://ftp.rgd.mcw.edu/pub/data_release	DPYD
0.0402469	1	7	92.1212	DOID:9002055 Chronic Allograft Nephropathy	ftp://ftp.rgd.mcw.edu/pub/data_release	ALB
0.0402469	1	7	92.1212	DOID:9669 senile cataract	ftp://ftp.rgd.mcw.edu/pub/data_release	CAT
0.0402469	1	7	92.1212	DOID:0002116 pterygium	ftp://ftp.rgd.mcw.edu/pub/data_release	CAT
0.0402469	1	7	92.1212	DOID:9004203 Chromosome Breakage	ftp://ftp.rgd.mcw.edu/pub/data_release	CAT
0.0402469	1	7	92.1212	DOID:9004250 Hepatic Insufficiency	ftp://ftp.rgd.mcw.edu/pub/data_release	ALB
0.0402469	1	7	92.1212	DOID:0050696 fetal alcohol spectrum disorder	ftp://ftp.rgd.mcw.edu/pub/data_release	CAT
0.0402469	1	7	92.1212	DOID:0050625 biliary tract benign neoplasm	ftp://ftp.rgd.mcw.edu/pub/data_release	ALB
0.0402469	1	7	92.1212	Forebrain dorsal/ventral pattern formation	http://amigo.geneontology.org/amigo/term/GO:0021798	PAX6
0.0402469	1	7	92.1212	Forebrain neuron fate commitment	http://amigo.geneontology.org/amigo/term/GO:0021877	PAX6
0.0402469	1	7	92.1212	Regulation of cell projection size	http://amigo.geneontology.org/amigo/term/GO:0032536	NEFL
0.0402469	1	7	92.1212	Nucleobase catabolic process	http://amigo.geneontology.org/amigo/term/GO:0046113	DPYD
0.0402469	1	7	92.1212	Pyrimidine nucleoside catabolic process	http://amigo.geneontology.org/amigo/term/GO:0046135	DPYD
0.0402469	3	294	6.58009	Regulation of cell development	http://amigo.geneontology.org/amigo/term/GO:0060284	NEFL PAX6 ARPC2
0.0402469	1	7	92.1212	Iris morphogenesis	http://amigo.geneontology.org/amigo/term/GO:0061072	PAX6
0.0402469	1	7	92.1212	Cornea development in camera-type eye	http://amigo.geneontology.org/amigo/term/GO:0061303	PAX6
0.0402469	1	7	92.1212	Cellular response to muramyl dipeptide	http://amigo.geneontology.org/amigo/term/GO:0071225	VIM
0.0404174	3	298	6.49176	DOID:9970 obesity	ftp://ftp.rgd.mcw.edu/pub/data_release	DPYD ACLY CS
0.0411138	2	103	12.5213	Negative regulation of cytoskeleton organization	http://amigo.geneontology.org/amigo/term/GO:0051494	STMN1 LIMA1
0.0411138	2	103	12.5213	Retina development in camera-type eye	http://amigo.geneontology.org/amigo/term/GO:0060041	RPE65 PAX6
0.0422037	2	105	12.2828	DOID:9074 systemic lupus erythematosus	ftp://ftp.rgd.mcw.edu/pub/data_release	VIM CAT
0.0422037	2	105	12.2828	Stem cell population maintenance	http://amigo.geneontology.org/amigo/term/GO:0019827	POU5F1 NANOG
0.0422037	2	105	12.2828	Actin filament bundle assembly	http://amigo.geneontology.org/amigo/term/GO:0051017	STMN1 LIMA1
0.0422037	2	105	12.2828	Microtubule cytoskeleton organization involved in mitosis	http://amigo.geneontology.org/amigo/term/GO:1902850	PAX6 STMN1
0.0422037	2	105	12.2828	Negative regulation of supramolecular fiber organization	http://amigo.geneontology.org/amigo/term/GO:1902904	STMN1 LIMA1
0.0428838	2	106	12.167	DOID:9002928 Colonic Neoplasms	ftp://ftp.rgd.mcw.edu/pub/data_release	DPYD CP
0.0430204	1	8	80.6061	Regulation of GTP binding	http://amigo.geneontology.org/amigo/term/GO:1904424	STMN1
0.0430204	1	8	80.6061	RNA polymerase II intronic transcription regulatory region sequence-specific DNA binding	http://amigo.geneontology.org/amigo/term/GO:0001162	POU5F1
0.0430204	1	8	80.6061	Structural constituent of postsynapse	http://amigo.geneontology.org/amigo/term/GO:0099186	NEFL
0.0430204	1	8	80.6061	DOID:9719 proliferative vitreoretinopathy	ftp://ftp.rgd.mcw.edu/pub/data_release	CAT
0.0430204	1	8	80.6061	DOID:4948 gallbladder carcinoma	ftp://ftp.rgd.mcw.edu/pub/data_release	ACTR3
0.0430204	1	8	80.6061	DOID:3458 breast adenocarcinoma	ftp://ftp.rgd.mcw.edu/pub/data_release	CAT
0.0430204	1	8	80.6061	DOID:9005725 Iron Overload	ftp://ftp.rgd.mcw.edu/pub/data_release	CP
0.0430204	1	8	80.6061	DOID:11088 asphyxia neonatorum	ftp://ftp.rgd.mcw.edu/pub/data_release	CAT
0.0430204	1	8	80.6061	DOID:520 aortic disease	ftp://ftp.rgd.mcw.edu/pub/data_release	CAT
0.0430204	1	8	80.6061	Pyrimidine deoxyribonucleoside monophosphate metabolic process	http://amigo.geneontology.org/amigo/term/GO:0009176	DPYD
0.0430204	1	8	80.6061	DOID:9009007 Tooth Abnormalities	ftp://ftp.rgd.mcw.edu/pub/data_release	PAX6
0.0430204	1	8	80.6061	DOID:9005463 Occupational Diseases	ftp://ftp.rgd.mcw.edu/pub/data_release	ALB
0.0430204	1	8	80.6061	Pyrimidine deoxyribonucleotide catabolic process	http://amigo.geneontology.org/amigo/term/GO:0009223	DPYD
0.0430204	1	8	80.6061	DOID:9002315 Kidney Calculi	ftp://ftp.rgd.mcw.edu/pub/data_release	CAT
0.0430204	1	8	80.6061	Dorsal/ventral axis specification	http://amigo.geneontology.org/amigo/term/GO:0009950	PAX6
0.0430204	1	8	80.6061	Response to laminar fluid shear stress	http://amigo.geneontology.org/amigo/term/GO:0034616	KLF2
0.0430204	2	108	11.9416	Eye morphogenesis	http://amigo.geneontology.org/amigo/term/GO:0048592	RPE65 PAX6
0.0430204	1	8	80.6061	Response to electrical stimulus	http://amigo.geneontology.org/amigo/term/GO:0051602	RPE65
0.0430204	1	8	80.6061	Neurofilament cytoskeleton organization	http://amigo.geneontology.org/amigo/term/GO:0060052	NEFL
0.0430204	2	107	12.0532	Actin filament bundle organization	http://amigo.geneontology.org/amigo/term/GO:0061572	STMN1 LIMA1
0.0430204	1	8	80.6061	Lens fiber cell development	http://amigo.geneontology.org/amigo/term/GO:0070307	VIM
0.0430204	2	107	12.0532	Maintenance of cell number	http://amigo.geneontology.org/amigo/term/GO:0098727	POU5F1 NANOG
0.0430204	1	8	80.6061	Fructose metabolic process	http://amigo.geneontology.org/amigo/term/GO:0006000	ALDOB
0.043728	2	110	11.7245	DOID:9744 type 1 diabetes mellitus	ftp://ftp.rgd.mcw.edu/pub/data_release	CP CAT
0.043728	2	110	11.7245	Meiotic nuclear division	http://amigo.geneontology.org/amigo/term/GO:0140013	ACTR2 ACTR3
0.0437491	3	315	6.14141	Monocarboxylic acid metabolic process	http://amigo.geneontology.org/amigo/term/GO:0032787	ETFA ETFB ALDOB
0.044311	2	111	11.6189	DOID:8398 osteoarthritis	ftp://ftp.rgd.mcw.edu/pub/data_release	ETFA VIM
0.0444654	6	1282	3.01801	Cell development	http://amigo.geneontology.org/amigo/term/GO:0048468	NEFL VIM PAX6 ARPC2 STMN1 KLF2
0.0445982	4	594	4.34241	Negative regulation of transcription by RNA polymerase II	http://amigo.geneontology.org/amigo/term/GO:0000122	POU5F1 PAX6 KLF2 NANOG
0.0452733	3	320	6.04545	Innate immune response	http://amigo.geneontology.org/amigo/term/GO:0045087	ACTR2 VIM ACTR3
0.045437	4	598	4.31337	Plasma membrane region	http://amigo.geneontology.org/amigo/term/GO:0098590	GPHN ARPC1A ARPC2 LIMA1
0.0457104	1	9	71.6498	Pyrimidine nucleobase metabolic process	http://amigo.geneontology.org/amigo/term/GO:0006206	DPYD
0.0457104	1	9	71.6498	Degradation of cysteine and homocysteine	https://reactome.org/download/current	SUOX
0.0457104	1	9	71.6498	Erythrocytes take up carbon dioxide and release oxygen	https://reactome.org/download/current	CA2
0.0457104	1	9	71.6498	O2/CO2 exchange in erythrocytes	https://reactome.org/download/current	CA2
0.0457104	1	9	71.6498	DOID:9281 phenylketonuria	ftp://ftp.rgd.mcw.edu/pub/data_release	CAT
0.0457104	1	9	71.6498	DOID:9006928 Viral Bronchiolitis	ftp://ftp.rgd.mcw.edu/pub/data_release	CAT
0.0457104	1	9	71.6498	DOID:10316 pneumoconiosis	ftp://ftp.rgd.mcw.edu/pub/data_release	CAT
0.0457104	1	9	71.6498	DOID:14227 azoospermia	ftp://ftp.rgd.mcw.edu/pub/data_release	ALB
0.0457104	1	9	71.6498	Pyrimidine nucleoside monophosphate metabolic process	http://amigo.geneontology.org/amigo/term/GO:0009129	DPYD
0.0457104	1	9	71.6498	Deoxyribonucleotide biosynthetic process	http://amigo.geneontology.org/amigo/term/GO:0009263	RRM2
0.0457104	1	9	71.6498	DOID:2738 pseudoxanthoma elasticum	ftp://ftp.rgd.mcw.edu/pub/data_release	CAT
0.0457104	1	9	71.6498	DOID:9000307 Presbycusis	ftp://ftp.rgd.mcw.edu/pub/data_release	CAT
0.0457104	1	9	71.6498	Terpenoid biosynthetic process	http://amigo.geneontology.org/amigo/term/GO:0016114	RPE65
0.0457104	1	9	71.6498	Glial cell fate commitment	http://amigo.geneontology.org/amigo/term/GO:0021781	PAX6
0.0457104	1	9	71.6498	Angiotensin-activated signaling pathway	http://amigo.geneontology.org/amigo/term/GO:0038166	CA2
0.0457104	1	9	71.6498	Hydrogen peroxide catabolic process	http://amigo.geneontology.org/amigo/term/GO:0042744	CAT
0.0457104	6	1292	2.99465	Positive regulation of nucleobase-containing compound metabolic process	http://amigo.geneontology.org/amigo/term/GO:0045935	POU5F1 ACTR2 PAX6 ACTR3 KLF2 NANOG
0.0457104	4	602	4.28471	Negative regulation of developmental process	http://amigo.geneontology.org/amigo/term/GO:0051093	POU5F1 PAX6 KLF2 NANOG
0.0457104	1	9	71.6498	Bergmann glial cell differentiation	http://amigo.geneontology.org/amigo/term/GO:0060020	VIM
0.0457104	3	325	5.95245	Cellular response to organonitrogen compound	http://amigo.geneontology.org/amigo/term/GO:0071417	RPE65 CA2 VIM
0.0457104	1	9	71.6498	Neurotransmitter-gated ion channel clustering	http://amigo.geneontology.org/amigo/term/GO:0072578	GPHN
0.0462609	3	328	5.898	Cell morphogenesis involved in neuron differentiation	http://amigo.geneontology.org/amigo/term/GO:0048667	NEFL PAX6 STMN1
0.04655	3	329	5.88008	DNA-binding transcription activator activity, RNA polymerase II-specific	http://amigo.geneontology.org/amigo/term/GO:0001228	POU5F1 PAX6 NANOG
0.0471474	2	118	10.9296	Focal adhesion	http://amigo.geneontology.org/amigo/term/GO:0005925	ARPC2 LIMA1
0.0473499	1	10	64.4848	Negative regulation of sprouting angiogenesis	http://amigo.geneontology.org/amigo/term/GO:1903671	KLF2
0.0473499	1	10	64.4848	Pyrimidine nucleotide catabolic process	http://amigo.geneontology.org/amigo/term/GO:0006244	DPYD
0.0473499	1	10	64.4848	Positive regulation of double-strand break repair via homologous recombination	http://amigo.geneontology.org/amigo/term/GO:1905168	ACTR2
0.0473499	3	335	5.77476	DNA-binding transcription activator activity	http://amigo.geneontology.org/amigo/term/GO:0001216	POU5F1 PAX6 NANOG
0.0473499	1	10	64.4848	NADH metabolic process	http://amigo.geneontology.org/amigo/term/GO:0006734	ALDOB
0.0473499	2	119	10.8378	Heme binding	http://amigo.geneontology.org/amigo/term/GO:0020037	SUOX CAT
0.0473499	1	10	64.4848	Co-SMAD binding	http://amigo.geneontology.org/amigo/term/GO:0070410	PAX6
0.0473499	1	10	64.4848	Sulfur metabolism	http://www.genome.jp/kegg-bin/show_pathway?ssc00920	SUOX
0.0473499	1	10	64.4848	DOID:9001004 Chronic Periodontitis	ftp://ftp.rgd.mcw.edu/pub/data_release	NES
0.0473499	1	10	64.4848	DOID:9001403 Bronchopulmonary Dysplasia	ftp://ftp.rgd.mcw.edu/pub/data_release	CAT
0.0473499	1	10	64.4848	DOID:1227 neutropenia	ftp://ftp.rgd.mcw.edu/pub/data_release	DPYD
0.0473499	1	10	64.4848	DOID:9000046 Poisoning	ftp://ftp.rgd.mcw.edu/pub/data_release	ALB
0.0473499	1	10	64.4848	DOID:3753 Hermansky-Pudlak syndrome	ftp://ftp.rgd.mcw.edu/pub/data_release	CP
0.0473499	1	10	64.4848	DOID:13207 proliferative diabetic retinopathy	ftp://ftp.rgd.mcw.edu/pub/data_release	CAT
0.0473499	1	10	64.4848	DOID:9008386 Hydrops Fetalis	ftp://ftp.rgd.mcw.edu/pub/data_release	ALB
0.0473499	1	10	64.4848	DOID:2352 hemochromatosis	ftp://ftp.rgd.mcw.edu/pub/data_release	CP
0.0473499	1	10	64.4848	Endodermal cell fate commitment	http://amigo.geneontology.org/amigo/term/GO:0001711	POU5F1
0.0473499	1	10	64.4848	Pyrimidine deoxyribonucleotide metabolic process	http://amigo.geneontology.org/amigo/term/GO:0009219	DPYD
0.0473499	1	10	64.4848	PW:0001754 pyruvate dehydrogenase E2 deficiency pathway	ftp://ftp.rgd.mcw.edu/pub/data_release	CS
0.0473499	1	10	64.4848	PW:0001755 pyruvate dehydrogenase E3 deficiency pathway	ftp://ftp.rgd.mcw.edu/pub/data_release	CS
0.0473499	1	10	64.4848	PW:0001814 mitochondrial complex II deficiency pathway	ftp://ftp.rgd.mcw.edu/pub/data_release	CS
0.0473499	1	10	64.4848	PW:0002098 fumaric aciduria pathway	ftp://ftp.rgd.mcw.edu/pub/data_release	CS
0.0473499	1	10	64.4848	PW:0001629 transaldolase deficiency pathway	ftp://ftp.rgd.mcw.edu/pub/data_release	TKT
0.0473499	1	10	64.4848	PW:0001704 ribose 5-phosphate isomerase deficiency pathway	ftp://ftp.rgd.mcw.edu/pub/data_release	TKT
0.0473499	1	10	64.4848	PW:0001005 retinoid cycle metabolic pathway	ftp://ftp.rgd.mcw.edu/pub/data_release	RPE65
0.0473499	1	10	64.4848	PW:0002101 hereditary fructose intolerance syndrome pathway	ftp://ftp.rgd.mcw.edu/pub/data_release	ALDOB
0.0473499	1	10	64.4848	PW:0002388 fructosuria pathway	ftp://ftp.rgd.mcw.edu/pub/data_release	ALDOB
0.0473499	2	122	10.5713	Lipid modification	http://amigo.geneontology.org/amigo/term/GO:0030258	ETFA ETFB
0.0473499	1	10	64.4848	Negative regulation of microtubule polymerization	http://amigo.geneontology.org/amigo/term/GO:0031115	STMN1
0.0473499	1	10	64.4848	Establishment of mitochondrion localization, microtubule-mediated	http://amigo.geneontology.org/amigo/term/GO:0034643	NEFL
0.0473499	1	10	64.4848	Mitochondrion transport along microtubule	http://amigo.geneontology.org/amigo/term/GO:0047497	NEFL
0.0473499	1	10	64.4848	Maintenance of organelle location	http://amigo.geneontology.org/amigo/term/GO:0051657	ALB
0.0473499	1	10	64.4848	Proton-transporting two-sector ATPase complex assembly	http://amigo.geneontology.org/amigo/term/GO:0070071	ALDOB
0.0473499	1	10	64.4848	Thrombin-activated receptor signaling pathway	http://amigo.geneontology.org/amigo/term/GO:0070493	STMN1
0.0473499	2	121	10.6587	Meiotic cell cycle process	http://amigo.geneontology.org/amigo/term/GO:1903046	ACTR2 ACTR3
0.0485036	2	124	10.4008	Positive regulation of neurogenesis	http://amigo.geneontology.org/amigo/term/GO:0050769	NEFL PAX6
0.0485489	4	631	4.08779	Cellular lipid metabolic process	http://amigo.geneontology.org/amigo/term/GO:0044255	ETFA ETFB RPE65 CAT
0.0490722	2	125	10.3176	Cell-substrate junction	http://amigo.geneontology.org/amigo/term/GO:0030055	ARPC2 LIMA1
0.0496416	2	126	10.2357	Tetrapyrrole binding	http://amigo.geneontology.org/amigo/term/GO:0046906	SUOX CAT
0.0496416	2	126	10.2357	DOID:9007838 Myocardial Reperfusion Injury	ftp://ftp.rgd.mcw.edu/pub/data_release	ALB CAT
0.0497502	4	637	4.04928	DNA-binding transcription factor activity, RNA polymerase II-specific	http://amigo.geneontology.org/amigo/term/GO:0000981	POU5F1 PAX6 KLF2 NANOG
0.0497639	1	11	58.6226	Intronic transcription regulatory region sequence-specific DNA binding	http://amigo.geneontology.org/amigo/term/GO:0001161	POU5F1
0.0497639	1	11	58.6226	HMG box domain binding	http://amigo.geneontology.org/amigo/term/GO:0071837	PAX6
0.0497639	2	128	10.0758	FoxO signaling pathway	http://www.genome.jp/kegg-bin/show_pathway?ssc04068	CAT KLF2
0.0497639	2	127	10.1551	DOID:9006205 Animal Disease Models	ftp://ftp.rgd.mcw.edu/pub/data_release	ALB VIM
0.0497639	2	127	10.1551	DOID:0050700 cardiomyopathy	ftp://ftp.rgd.mcw.edu/pub/data_release	CAT CS
0.0497639	1	11	58.6226	DOID:9002525 Hereditary Eye Diseases	ftp://ftp.rgd.mcw.edu/pub/data_release	RPE65
0.0497639	1	11	58.6226	DOID:9009039 Hyperemia	ftp://ftp.rgd.mcw.edu/pub/data_release	CAT
0.0497639	1	11	58.6226	DOID:231 motor neuron disease	ftp://ftp.rgd.mcw.edu/pub/data_release	VIM
0.0497639	1	11	58.6226	DOID:13550 angle-closure glaucoma	ftp://ftp.rgd.mcw.edu/pub/data_release	CAT
0.0497639	1	11	58.6226	DOID:0060673 Peters anomaly	ftp://ftp.rgd.mcw.edu/pub/data_release	PAX6
0.0497639	1	11	58.6226	Hemoglobin metabolic process	http://amigo.geneontology.org/amigo/term/GO:0020027	CAT
0.0497639	1	11	58.6226	Rostrocaudal neural tube patterning	http://amigo.geneontology.org/amigo/term/GO:0021903	PAX6
0.0497639	1	11	58.6226	Telencephalon regionalization	http://amigo.geneontology.org/amigo/term/GO:0021978	PAX6
0.0497639	1	11	58.6226	Intestinal cholesterol absorption	http://amigo.geneontology.org/amigo/term/GO:0030299	LIMA1
0.0497639	1	11	58.6226	Retinal metabolic process	http://amigo.geneontology.org/amigo/term/GO:0042574	RPE65
0.0497639	1	11	58.6226	Aldehyde biosynthetic process	http://amigo.geneontology.org/amigo/term/GO:0046184	TKT
0.0497639	2	128	10.0758	Carboxylic acid catabolic process	http://amigo.geneontology.org/amigo/term/GO:0046395	ETFA ETFB
0.0497639	1	11	58.6226	Hepatocyte growth factor receptor signaling pathway	http://amigo.geneontology.org/amigo/term/GO:0048012	STMN1
0.0497639	2	128	10.0758	Positive regulation of binding	http://amigo.geneontology.org/amigo/term/GO:0051099	PAX6 STMN1
0.0497639	3	351	5.51153	Plasma membrane bounded cell projection assembly	http://amigo.geneontology.org/amigo/term/GO:0120031	ACTR2 ACTR3 ARPC2
0.0506564	2	130	9.92075	Organic acid catabolic process	http://amigo.geneontology.org/amigo/term/GO:0016054	ETFA ETFB
0.0506564	3	355	5.44942	Cell projection assembly	http://amigo.geneontology.org/amigo/term/GO:0030031	ACTR2 ACTR3 ARPC2
0.0506564	4	648	3.98055	Neuron development	http://amigo.geneontology.org/amigo/term/GO:0048666	NEFL VIM PAX6 STMN1
0.0506564	3	355	5.44942	Neuron projection morphogenesis	http://amigo.geneontology.org/amigo/term/GO:0048812	NEFL PAX6 STMN1
0.0509258	4	650	3.9683	Enzyme linked receptor protein signaling pathway	http://amigo.geneontology.org/amigo/term/GO:0007167	RPE65 VIM STMN1 NANOG
0.0509258	2	131	9.84502	Gastrulation	http://amigo.geneontology.org/amigo/term/GO:0007369	POU5F1 NANOG
0.0509258	2	131	9.84502	Meiotic cell cycle	http://amigo.geneontology.org/amigo/term/GO:0051321	ACTR2 ACTR3
0.0514697	1	12	53.7374	Cellular response to angiotensin	http://amigo.geneontology.org/amigo/term/GO:1904385	CA2
0.0514697	1	12	53.7374	Response to angiotensin	http://amigo.geneontology.org/amigo/term/GO:1990776	CA2
0.0514697	6	1386	2.79155	Regulation of transcription by RNA polymerase II	http://amigo.geneontology.org/amigo/term/GO:0006357	POU5F1 ACTR2 PAX6 ACTR3 KLF2 NANOG
0.0514697	1	12	53.7374	Oxidoreductase activity, acting on the CH-CH group of donors, NAD or NADP as acceptor	http://amigo.geneontology.org/amigo/term/GO:0016628	DPYD
0.0514697	1	12	53.7374	Reversible hydration of carbon dioxide	https://reactome.org/download/current	CA2
0.0514697	1	12	53.7374	Apoptotic cleavage of cellular proteins	https://reactome.org/download/current	VIM
0.0514697	1	12	53.7374	DOID:9005433 Calcium Oxalate Nephrolithiasis	ftp://ftp.rgd.mcw.edu/pub/data_release	CAT
0.0514697	1	12	53.7374	DOID:9000008 Graves Ophthalmopathy	ftp://ftp.rgd.mcw.edu/pub/data_release	CAT
0.0514697	1	12	53.7374	DOID:8924 autoimmune thrombocytopenic purpura	ftp://ftp.rgd.mcw.edu/pub/data_release	ALB
0.0514697	1	12	53.7374	DOID:10976 membranous glomerulonephritis	ftp://ftp.rgd.mcw.edu/pub/data_release	ALB
0.0514697	1	12	53.7374	Ribonucleoside monophosphate catabolic process	http://amigo.geneontology.org/amigo/term/GO:0009158	DPYD
0.0514697	1	12	53.7374	DOID:916 liver benign neoplasm	ftp://ftp.rgd.mcw.edu/pub/data_release	ALDOB
0.0514697	1	12	53.7374	DOID:9000536 Anterior Segment Dysgenesis 6	ftp://ftp.rgd.mcw.edu/pub/data_release	PAX6
0.0514697	1	12	53.7374	DOID:1432 blindness	ftp://ftp.rgd.mcw.edu/pub/data_release	RPE65
0.0514697	1	12	53.7374	Negative regulation of cell fate commitment	http://amigo.geneontology.org/amigo/term/GO:0010454	NANOG
0.0514697	1	12	53.7374	NAD metabolic process	http://amigo.geneontology.org/amigo/term/GO:0019674	ALDOB
0.0514697	1	12	53.7374	Positive regulation of collagen biosynthetic process	http://amigo.geneontology.org/amigo/term/GO:0032967	VIM
0.0514697	2	134	9.6246	Cellular lipid catabolic process	http://amigo.geneontology.org/amigo/term/GO:0044242	ETFA ETFB
0.0514697	5	997	3.23394	Regulation of cell differentiation	http://amigo.geneontology.org/amigo/term/GO:0045595	POU5F1 NEFL PAX6 ARPC2 NANOG
0.0514697	1	12	53.7374	Regulation of retinoic acid receptor signaling pathway	http://amigo.geneontology.org/amigo/term/GO:0048385	KLF2
0.0514697	1	12	53.7374	Establishment of mitochondrion localization	http://amigo.geneontology.org/amigo/term/GO:0051654	NEFL
0.0514697	1	12	53.7374	Cellular response to fluid shear stress	http://amigo.geneontology.org/amigo/term/GO:0071498	KLF2
0.0514697	3	360	5.37374	Cellular response to nitrogen compound	http://amigo.geneontology.org/amigo/term/GO:1901699	RPE65 CA2 VIM
0.0514697	1	12	53.7374	Acetyl-CoA biosynthetic process	http://amigo.geneontology.org/amigo/term/GO:0006085	ACLY
0.0514697	1	12	53.7374	Negative regulation of regulated secretory pathway	http://amigo.geneontology.org/amigo/term/GO:1903306	POU5F1
0.0515845	5	1007	3.20183	Cell junction	http://amigo.geneontology.org/amigo/term/GO:0030054	GPHN NEFL ACTR3 ARPC2 LIMA1
0.0522665	3	366	5.28564	Plasma membrane bounded cell projection morphogenesis	http://amigo.geneontology.org/amigo/term/GO:0120039	NEFL PAX6 STMN1
0.0526836	3	368	5.25692	Chromatin binding	http://amigo.geneontology.org/amigo/term/GO:0003682	POU5F1 PAX6 NANOG
0.0526836	2	137	9.41385	DOID:3908 lung non-small cell carcinoma	ftp://ftp.rgd.mcw.edu/pub/data_release	ALB CAT
0.0526836	2	137	9.41385	Protein-containing complex disassembly	http://amigo.geneontology.org/amigo/term/GO:0032984	STMN1 LIMA1
0.0526836	3	368	5.25692	Cell projection morphogenesis	http://amigo.geneontology.org/amigo/term/GO:0048858	NEFL PAX6 STMN1
0.0533534	3	370	5.2285	Transcription factor binding	http://amigo.geneontology.org/amigo/term/GO:0008134	POU5F1 PAX6 NANOG
0.0534917	1	13	49.6037	Purine nucleobase metabolic process	http://amigo.geneontology.org/amigo/term/GO:0006144	DPYD
0.0534917	1	13	49.6037	Fatty acid binding	http://amigo.geneontology.org/amigo/term/GO:0005504	ALB
0.0534917	1	13	49.6037	NADPH regeneration	http://amigo.geneontology.org/amigo/term/GO:0006740	TKT
0.0534917	1	13	49.6037	Structural constituent of synapse	http://amigo.geneontology.org/amigo/term/GO:0098918	NEFL
0.0534917	1	13	49.6037	Ectoderm development	http://amigo.geneontology.org/amigo/term/GO:0007398	POU5F1
0.0534917	1	13	49.6037	DOID:12351 alcoholic hepatitis	ftp://ftp.rgd.mcw.edu/pub/data_release	ALB
0.0534917	1	13	49.6037	DOID:9006534 Nervous System Malformations	ftp://ftp.rgd.mcw.edu/pub/data_release	PAX6
0.0534917	1	13	49.6037	DOID:14018 alcoholic liver cirrhosis	ftp://ftp.rgd.mcw.edu/pub/data_release	CAT
0.0534917	1	13	49.6037	DOID:9002704 Leukoencephalopathies	ftp://ftp.rgd.mcw.edu/pub/data_release	DPYD
0.0534917	1	13	49.6037	DOID:2048 autoimmune hepatitis	ftp://ftp.rgd.mcw.edu/pub/data_release	ALDOB
0.0534917	1	13	49.6037	Positive regulation of collagen metabolic process	http://amigo.geneontology.org/amigo/term/GO:0010714	VIM
0.0534917	1	13	49.6037	PW:0000063 glyoxylate and dicarboxylate metabolic pathway	ftp://ftp.rgd.mcw.edu/pub/data_release	CS
0.0534917	1	13	49.6037	Thioester biosynthetic process	http://amigo.geneontology.org/amigo/term/GO:0035384	ACLY
0.0534917	1	13	49.6037	Lipid digestion	http://amigo.geneontology.org/amigo/term/GO:0044241	LIMA1
0.0534917	2	139	9.2784	Cellular response to peptide hormone stimulus	http://amigo.geneontology.org/amigo/term/GO:0071375	RPE65 CA2
0.0534917	1	13	49.6037	Acyl-CoA biosynthetic process	http://amigo.geneontology.org/amigo/term/GO:0071616	ACLY
0.0534917	1	13	49.6037	Intestinal lipid absorption	http://amigo.geneontology.org/amigo/term/GO:0098856	LIMA1
0.0534917	1	13	49.6037	Pentose-phosphate shunt	http://amigo.geneontology.org/amigo/term/GO:0006098	TKT
0.055455	3	380	5.09091	Carbohydrate derivative biosynthetic process	http://amigo.geneontology.org/amigo/term/GO:1901137	ACLY TKT RRM2
0.0557072	2	144	8.95623	DOID:9002165 Diabetic Nephropathies	ftp://ftp.rgd.mcw.edu/pub/data_release	ALB CAT
0.0557072	2	144	8.95623	Glial cell differentiation	http://amigo.geneontology.org/amigo/term/GO:0010001	VIM PAX6
0.0557072	2	144	8.95623	Stem cell differentiation	http://amigo.geneontology.org/amigo/term/GO:0048863	POU5F1 NANOG
0.0562598	3	383	5.05103	Cell part morphogenesis	http://amigo.geneontology.org/amigo/term/GO:0032990	NEFL PAX6 STMN1
0.0562668	1	14	46.0606	Negative regulation of neural precursor cell proliferation	http://amigo.geneontology.org/amigo/term/GO:2000178	PAX6
0.0562668	1	14	46.0606	DOID:7725 epilepsy with generalized tonic-clonic seizures	ftp://ftp.rgd.mcw.edu/pub/data_release	NES
0.0562668	1	14	46.0606	DOID:8283 peritonitis	ftp://ftp.rgd.mcw.edu/pub/data_release	ALDOB
0.0562668	1	14	46.0606	DOID:4724 brain edema	ftp://ftp.rgd.mcw.edu/pub/data_release	CP
0.0562668	1	14	46.0606	DOID:2920 membranoproliferative glomerulonephritis	ftp://ftp.rgd.mcw.edu/pub/data_release	ALB
0.0562668	1	14	46.0606	Deoxyribonucleoside monophosphate catabolic process	http://amigo.geneontology.org/amigo/term/GO:0009159	DPYD
0.0562668	1	14	46.0606	DOID:11396 pulmonary edema	ftp://ftp.rgd.mcw.edu/pub/data_release	CAT
0.0562668	1	14	46.0606	PW:0000190 porphyrin and chlorophyll metabolic pathway	ftp://ftp.rgd.mcw.edu/pub/data_release	CP
0.0562668	1	14	46.0606	Regulation of collagen biosynthetic process	http://amigo.geneontology.org/amigo/term/GO:0032965	VIM
0.0562668	3	384	5.03788	Response to lipid	http://amigo.geneontology.org/amigo/term/GO:0033993	POU5F1 VIM NANOG
0.0590561	6	1459	2.65188	Transcription by RNA polymerase II	http://amigo.geneontology.org/amigo/term/GO:0006366	POU5F1 ACTR2 PAX6 ACTR3 KLF2 NANOG
0.0590561	1	15	42.9899	Carbonate dehydratase activity	http://amigo.geneontology.org/amigo/term/GO:0004089	CA2
0.0590561	1	15	42.9899	Structural constituent of eye lens	http://amigo.geneontology.org/amigo/term/GO:0005212	VIM
0.0590561	1	15	42.9899	Oxygen binding	http://amigo.geneontology.org/amigo/term/GO:0019825	ALB
0.0590561	3	394	4.91001	DOID:1059 intellectual disability	ftp://ftp.rgd.mcw.edu/pub/data_release	RPE65 DPYD PAX6
0.0590561	1	15	42.9899	DOID:9477 pulmonary embolism	ftp://ftp.rgd.mcw.edu/pub/data_release	CAT
0.0590561	1	15	42.9899	DOID:1555 urticaria	ftp://ftp.rgd.mcw.edu/pub/data_release	ALB
0.0590561	1	15	42.9899	DOID:9008296 Eye Abnormalities	ftp://ftp.rgd.mcw.edu/pub/data_release	PAX6
0.0590561	1	15	42.9899	Nucleoside catabolic process	http://amigo.geneontology.org/amigo/term/GO:0009164	DPYD
0.0590561	2	151	8.54104	Nucleotide biosynthetic process	http://amigo.geneontology.org/amigo/term/GO:0009165	ACLY RRM2
0.0590561	1	15	42.9899	PW:0000167 pantothenic acid metabolic pathway	ftp://ftp.rgd.mcw.edu/pub/data_release	DPYD
0.0590561	1	15	42.9899	Regulation of calcium ion-dependent exocytosis	http://amigo.geneontology.org/amigo/term/GO:0017158	POU5F1
0.0590561	4	705	3.65871	Response to external biotic stimulus	http://amigo.geneontology.org/amigo/term/GO:0043207	ACTR2 VIM ACTR3 STMN1
0.0590561	4	704	3.66391	Response to other organism	http://amigo.geneontology.org/amigo/term/GO:0051707	ACTR2 VIM ACTR3 STMN1
0.0602798	3	399	4.84848	Sensory organ development	http://amigo.geneontology.org/amigo/term/GO:0007423	RPE65 VIM PAX6
0.0606341	2	154	8.37466	Epithelial cell development	http://amigo.geneontology.org/amigo/term/GO:0002064	VIM PAX6
0.0608869	3	401	4.8243	Anchoring junction	http://amigo.geneontology.org/amigo/term/GO:0070161	ACTR3 ARPC2 LIMA1
0.0614518	1	16	40.303	RNA polymerase II core promoter sequence-specific DNA binding	http://amigo.geneontology.org/amigo/term/GO:0000979	PAX6
0.0614518	1	16	40.303	Signal sequence binding	http://amigo.geneontology.org/amigo/term/GO:0005048	CAT
0.0614518	1	16	40.303	Exogenous protein binding	http://amigo.geneontology.org/amigo/term/GO:0140272	ALB
0.0614518	1	16	40.303	Nitrogen metabolism	http://www.genome.jp/kegg-bin/show_pathway?ssc00910	CA2
0.0614518	1	16	40.303	Protein methylation	https://reactome.org/download/current	ETFB
0.0614518	4	721	3.57752	DOID:5419 schizophrenia	ftp://ftp.rgd.mcw.edu/pub/data_release	ETFA DPYD CP ACTR3
0.0614518	1	16	40.303	DOID:10247 pleurisy	ftp://ftp.rgd.mcw.edu/pub/data_release	CAT
0.0614518	1	16	40.303	DOID:3969 thyroid gland papillary carcinoma	ftp://ftp.rgd.mcw.edu/pub/data_release	CAT
0.0614518	1	16	40.303	Nucleoside monophosphate catabolic process	http://amigo.geneontology.org/amigo/term/GO:0009125	DPYD
0.0614518	1	16	40.303	DOID:9004914 Postmenopausal Osteoporosis	ftp://ftp.rgd.mcw.edu/pub/data_release	CAT
0.0614518	1	16	40.303	DOID:12270 coloboma	ftp://ftp.rgd.mcw.edu/pub/data_release	PAX6
0.0614518	1	16	40.303	DOID:12271 aniridia	ftp://ftp.rgd.mcw.edu/pub/data_release	PAX6
0.0614518	1	16	40.303	Positive regulation of ATPase activity	http://amigo.geneontology.org/amigo/term/GO:0032781	ALDOB
0.0622226	2	158	8.16264	Nucleoside phosphate biosynthetic process	http://amigo.geneontology.org/amigo/term/GO:1901293	ACLY RRM2
0.0628647	2	159	8.1113	MicroRNAs in cancer	http://www.genome.jp/kegg-bin/show_pathway?ssc05206	VIM STMN1
0.0630912	1	17	37.9323	The canonical retinoid cycle in rods (twilight vision)	https://reactome.org/download/current	RPE65
0.0630912	2	160	8.06061	DOID:9005233 Mammary Neoplasms Experimental	ftp://ftp.rgd.mcw.edu/pub/data_release	TKT STMN1
0.0630912	1	17	37.9323	DOID:893 Wilson disease	ftp://ftp.rgd.mcw.edu/pub/data_release	CP
0.0630912	1	17	37.9323	DOID:1679 cystitis	ftp://ftp.rgd.mcw.edu/pub/data_release	CAT
0.0630912	1	17	37.9323	DOID:9002910 Hearing Loss Noise-Induced	ftp://ftp.rgd.mcw.edu/pub/data_release	CAT
0.0630912	1	17	37.9323	Deoxyribonucleoside monophosphate metabolic process	http://amigo.geneontology.org/amigo/term/GO:0009162	DPYD
0.0630912	1	17	37.9323	DOID:9006169 Head and Neck Neoplasms	ftp://ftp.rgd.mcw.edu/pub/data_release	DPYD
0.0630912	1	17	37.9323	Trophectodermal cell differentiation	http://amigo.geneontology.org/amigo/term/GO:0001829	POU5F1
0.0630912	1	17	37.9323	Signal transduction involved in regulation of gene expression	http://amigo.geneontology.org/amigo/term/GO:0023019	PAX6
0.0630912	3	411	4.70692	Epithelial cell differentiation	http://amigo.geneontology.org/amigo/term/GO:0030855	VIM PAX6 KLF2
0.0630912	1	17	37.9323	Positive regulation of neuroblast proliferation	http://amigo.geneontology.org/amigo/term/GO:0002052	PAX6
0.0630912	1	17	37.9323	Glandular epithelial cell development	http://amigo.geneontology.org/amigo/term/GO:0002068	PAX6
0.0630912	1	17	37.9323	Response to muramyl dipeptide	http://amigo.geneontology.org/amigo/term/GO:0032495	VIM
0.0630912	1	17	37.9323	Nucleobase-containing small molecule catabolic process	http://amigo.geneontology.org/amigo/term/GO:0034656	DPYD
0.0630912	1	17	37.9323	Negative regulation of Rho protein signal transduction	http://amigo.geneontology.org/amigo/term/GO:0035024	STMN1
0.0630912	5	1092	2.9526	Homeostatic process	http://amigo.geneontology.org/amigo/term/GO:0042592	RPE65 PAX6 STMN1 LIMA1 KLF2
0.0630912	2	162	7.96109	Response to peptide hormone	http://amigo.geneontology.org/amigo/term/GO:0043434	RPE65 CA2
0.0630912	1	17	37.9323	Detection of light stimulus involved in visual perception	http://amigo.geneontology.org/amigo/term/GO:0050908	RPE65
0.0630912	1	17	37.9323	Detection of light stimulus involved in sensory perception	http://amigo.geneontology.org/amigo/term/GO:0050962	RPE65
0.0630912	2	161	8.01054	Positive regulation of nervous system development	http://amigo.geneontology.org/amigo/term/GO:0051962	NEFL PAX6
0.0630912	1	17	37.9323	Synapse maturation	http://amigo.geneontology.org/amigo/term/GO:0060074	NEFL
0.0630912	1	17	37.9323	Positive regulation of transcription initiation from RNA polymerase II promoter	http://amigo.geneontology.org/amigo/term/GO:0060261	POU5F1
0.0633887	4	736	3.50461	Response to biotic stimulus	http://amigo.geneontology.org/amigo/term/GO:0009607	ACTR2 VIM ACTR3 STMN1
0.0649913	6	1512	2.55892	Catabolic process	http://amigo.geneontology.org/amigo/term/GO:0009056	ETFA ETFB DPYD VIM CAT ALDOB
0.0654444	1	18	35.8249	Positive regulation of transcription regulatory region DNA binding	http://amigo.geneontology.org/amigo/term/GO:2000679	PAX6
0.0654444	3	423	4.57339	Chromatin	http://amigo.geneontology.org/amigo/term/GO:0000785	POU5F1 PAX6 KLF2
0.0654444	1	18	35.8249	Metal ion SLC transporters	https://reactome.org/download/current	CP
0.0654444	1	18	35.8249	Blastocyst growth	http://amigo.geneontology.org/amigo/term/GO:0001832	POU5F1
0.0654444	1	18	35.8249	PW:0000077 beta-alanine metabolic pathway	ftp://ftp.rgd.mcw.edu/pub/data_release	DPYD
0.0654444	1	18	35.8249	PW:0001585 vitamin A deficiency pathway	ftp://ftp.rgd.mcw.edu/pub/data_release	RPE65
0.0654444	1	18	35.8249	PW:0002065 disulfiram pharmacodynamics pathway	ftp://ftp.rgd.mcw.edu/pub/data_release	CAT
0.0654444	3	424	4.56261	Microtubule cytoskeleton organization	http://amigo.geneontology.org/amigo/term/GO:0000226	NEFL PAX6 STMN1
0.0654444	1	18	35.8249	Deoxyribose phosphate catabolic process	http://amigo.geneontology.org/amigo/term/GO:0046386	DPYD
0.0654444	1	18	35.8249	Glucose 6-phosphate metabolic process	http://amigo.geneontology.org/amigo/term/GO:0051156	TKT
0.0654444	1	18	35.8249	Pyrimidine-containing compound catabolic process	http://amigo.geneontology.org/amigo/term/GO:0072529	DPYD
0.0654444	1	18	35.8249	Type B pancreatic cell differentiation	http://amigo.geneontology.org/amigo/term/GO:0003309	PAX6
0.0671121	1	19	33.9394	DOID:10952 nephritis	ftp://ftp.rgd.mcw.edu/pub/data_release	ALB
0.0671121	3	431	4.4885	DOID:9002304 Prostatic Neoplasms	ftp://ftp.rgd.mcw.edu/pub/data_release	VIM PAX6 STMN1
0.0671121	1	19	33.9394	DOID:9000058 Keloid	ftp://ftp.rgd.mcw.edu/pub/data_release	ALB
0.0671121	1	19	33.9394	DOID:10825 essential hypertension	ftp://ftp.rgd.mcw.edu/pub/data_release	CAT
0.0671121	1	19	33.9394	Pyrimidine ribonucleotide metabolic process	http://amigo.geneontology.org/amigo/term/GO:0009218	DPYD
0.0671121	1	19	33.9394	Deoxyribonucleotide catabolic process	http://amigo.geneontology.org/amigo/term/GO:0009264	DPYD
0.0671121	1	19	33.9394	DOID:9003133 Hypertelorism	ftp://ftp.rgd.mcw.edu/pub/data_release	PAX6
0.0671121	1	19	33.9394	Regulation of collagen metabolic process	http://amigo.geneontology.org/amigo/term/GO:0010712	VIM
0.0671121	1	19	33.9394	Astrocyte development	http://amigo.geneontology.org/amigo/term/GO:0014002	VIM
0.0671121	1	19	33.9394	PW:0001603 beta-ureidopropionase deficiency pathway	ftp://ftp.rgd.mcw.edu/pub/data_release	DPYD
0.0671121	1	19	33.9394	PW:0001605 orotic aciduria 1 pathway	ftp://ftp.rgd.mcw.edu/pub/data_release	DPYD
0.0671121	1	19	33.9394	PW:0002211 dihydropyrimidinase deficiency pathway	ftp://ftp.rgd.mcw.edu/pub/data_release	DPYD
0.0671121	1	19	33.9394	PW:0002365 mitochondrial neurogastrointestinal encephalopathy syndrome pathway	ftp://ftp.rgd.mcw.edu/pub/data_release	DPYD
0.0671121	3	432	4.47811	Cellular component morphogenesis	http://amigo.geneontology.org/amigo/term/GO:0032989	NEFL PAX6 STMN1
0.0671121	1	19	33.9394	Positive regulation of transcription from RNA polymerase II promoter in response to stress	http://amigo.geneontology.org/amigo/term/GO:0036003	KLF2
0.0671121	1	19	33.9394	Positive regulation of nitric oxide biosynthetic process	http://amigo.geneontology.org/amigo/term/GO:0045429	KLF2
0.0671121	3	430	4.49894	Negative regulation of cell differentiation	http://amigo.geneontology.org/amigo/term/GO:0045596	POU5F1 PAX6 NANOG
0.0671121	3	433	4.46777	Negative regulation of cellular component organization	http://amigo.geneontology.org/amigo/term/GO:0051129	VIM STMN1 LIMA1
0.0671121	7	1972	2.28902	Positive regulation of nitrogen compound metabolic process	http://amigo.geneontology.org/amigo/term/GO:0051173	POU5F1 ACTR2 VIM PAX6 ACTR3 KLF2 NANOG
0.0671121	1	19	33.9394	Establishment of skin barrier	http://amigo.geneontology.org/amigo/term/GO:0061436	STMN1
0.0671121	1	19	33.9394	Acetyl-CoA metabolic process	http://amigo.geneontology.org/amigo/term/GO:0006084	ACLY
0.0675548	4	762	3.38503	Anatomical structure formation involved in morphogenesis	http://amigo.geneontology.org/amigo/term/GO:0048646	POU5F1 PAX6 KLF2 NANOG
0.0679236	7	1979	2.28092	Phosphate-containing compound metabolic process	http://amigo.geneontology.org/amigo/term/GO:0006796	GPHN DPYD PAX6 ACLY TKT RRM2 ALDOB
0.0682246	4	765	3.37176	Chromosome	http://amigo.geneontology.org/amigo/term/GO:0005694	POU5F1 ACTR2 PAX6 KLF2
0.0682849	2	174	7.41205	Skin development	http://amigo.geneontology.org/amigo/term/GO:0043588	PAX6 STMN1
0.0685008	1	20	32.2424	Positive regulation of nitric oxide metabolic process	http://amigo.geneontology.org/amigo/term/GO:1904407	KLF2
0.0685008	7	1991	2.26717	Phosphorus metabolic process	http://amigo.geneontology.org/amigo/term/GO:0006793	GPHN DPYD PAX6 ACLY TKT RRM2 ALDOB
0.0685008	1	20	32.2424	Histone acetyltransferase binding	http://amigo.geneontology.org/amigo/term/GO:0035035	PAX6
0.0685008	1	20	32.2424	R-SMAD binding	http://amigo.geneontology.org/amigo/term/GO:0070412	PAX6
0.0685008	1	20	32.2424	Sulfur amino acid metabolism	https://reactome.org/download/current	SUOX
0.0685008	1	20	32.2424	Apoptotic execution phase	https://reactome.org/download/current	VIM
0.0685008	1	20	32.2424	DOID:9000197 Edema	ftp://ftp.rgd.mcw.edu/pub/data_release	CAT
0.0685008	1	20	32.2424	Isoprenoid biosynthetic process	http://amigo.geneontology.org/amigo/term/GO:0008299	RPE65
0.0685008	1	20	32.2424	Regulation of cell fate commitment	http://amigo.geneontology.org/amigo/term/GO:0010453	NANOG
0.0685008	1	20	32.2424	PW:0001038 maturity-onset diabetes of the young pathway	ftp://ftp.rgd.mcw.edu/pub/data_release	PAX6
0.0685008	1	20	32.2424	Stem cell division	http://amigo.geneontology.org/amigo/term/GO:0017145	NANOG
0.0685008	1	20	32.2424	Response to fluid shear stress	http://amigo.geneontology.org/amigo/term/GO:0034405	KLF2
0.0685008	1	20	32.2424	Negative regulation of exocytosis	http://amigo.geneontology.org/amigo/term/GO:0045920	POU5F1
0.0685008	1	20	32.2424	Retinoic acid receptor signaling pathway	http://amigo.geneontology.org/amigo/term/GO:0048384	KLF2
0.0685008	1	20	32.2424	Embryonic camera-type eye morphogenesis	http://amigo.geneontology.org/amigo/term/GO:0048596	PAX6
0.0685008	1	20	32.2424	Lung epithelial cell differentiation	http://amigo.geneontology.org/amigo/term/GO:0060487	KLF2
0.0685008	1	20	32.2424	Lens fiber cell differentiation	http://amigo.geneontology.org/amigo/term/GO:0070306	VIM
0.0685008	1	20	32.2424	Glycosyl compound catabolic process	http://amigo.geneontology.org/amigo/term/GO:1901658	DPYD
0.0685008	3	439	4.40671	Mitotic cell cycle process	http://amigo.geneontology.org/amigo/term/GO:1903047	NES PAX6 STMN1
0.0701403	3	446	4.33755	Embryonic morphogenesis	http://amigo.geneontology.org/amigo/term/GO:0048598	POU5F1 PAX6 NANOG
0.0703351	1	21	30.7071	Positive regulation of DNA-templated transcription, initiation	http://amigo.geneontology.org/amigo/term/GO:2000144	POU5F1
0.0703351	2	180	7.16498	DNA-binding transcription repressor activity	http://amigo.geneontology.org/amigo/term/GO:0001217	PAX6 NANOG
0.0703351	2	180	7.16498	DNA-binding transcription repressor activity, RNA polymerase II-specific	http://amigo.geneontology.org/amigo/term/GO:0001227	PAX6 NANOG
0.0703351	1	21	30.7071	Actin monomer binding	http://amigo.geneontology.org/amigo/term/GO:0003785	LIMA1
0.0703351	1	21	30.7071	Proximal tubule bicarbonate reclamation	http://www.genome.jp/kegg-bin/show_pathway?ssc04964	CA2
0.0703351	1	21	30.7071	Anterograde axonal transport	http://amigo.geneontology.org/amigo/term/GO:0008089	NEFL
0.0703351	1	21	30.7071	DOID:11713 diabetic angiopathy	ftp://ftp.rgd.mcw.edu/pub/data_release	ALB
0.0703351	1	21	30.7071	DOID:9001725 Retina Reperfusion Injury	ftp://ftp.rgd.mcw.edu/pub/data_release	CAT
0.0703351	1	21	30.7071	Nucleobase metabolic process	http://amigo.geneontology.org/amigo/term/GO:0009112	DPYD
0.0703351	1	21	30.7071	DOID:0050426 Stevens-Johnson syndrome	ftp://ftp.rgd.mcw.edu/pub/data_release	ALB
0.0703351	1	21	30.7071	Postsynaptic membrane organization	http://amigo.geneontology.org/amigo/term/GO:0001941	GPHN
0.0703351	1	21	30.7071	Collagen biosynthetic process	http://amigo.geneontology.org/amigo/term/GO:0032964	VIM
0.0703351	1	21	30.7071	Enteroendocrine cell differentiation	http://amigo.geneontology.org/amigo/term/GO:0035883	PAX6
0.0703351	1	21	30.7071	Vasodilation	http://amigo.geneontology.org/amigo/term/GO:0042311	KLF2
0.0703351	1	21	30.7071	Negative regulation of stress fiber assembly	http://amigo.geneontology.org/amigo/term/GO:0051497	STMN1
0.0703351	1	21	30.7071	Lung cell differentiation	http://amigo.geneontology.org/amigo/term/GO:0060479	KLF2
0.0716489	4	789	3.26919	Cellular response to endogenous stimulus	http://amigo.geneontology.org/amigo/term/GO:0071495	RPE65 CA2 VIM NANOG
0.0724446	1	22	29.3113	Oxidoreductase activity, acting on single donors with incorporation of molecular oxygen, incorporation of two atoms of oxygen	http://amigo.geneontology.org/amigo/term/GO:0016702	RPE65
0.0724446	1	22	29.3113	4 iron, 4 sulfur cluster binding	http://amigo.geneontology.org/amigo/term/GO:0051539	ACO2
0.0724446	1	22	29.3113	Pantothenate and CoA biosynthesis	http://www.genome.jp/kegg-bin/show_pathway?ssc00770	DPYD
0.0724446	1	22	29.3113	DOID:14250 Down syndrome	ftp://ftp.rgd.mcw.edu/pub/data_release	ARPC4
0.0724446	1	22	29.3113	DOID:14323 Marfan syndrome	ftp://ftp.rgd.mcw.edu/pub/data_release	CAT
0.0724446	1	22	29.3113	Detection of visible light	http://amigo.geneontology.org/amigo/term/GO:0009584	RPE65
0.0724446	4	793	3.2527	Embryo development	http://amigo.geneontology.org/amigo/term/GO:0009790	POU5F1 PAX6 KLF2 NANOG
0.0724446	1	22	29.3113	Axon regeneration	http://amigo.geneontology.org/amigo/term/GO:0031103	NEFL
0.0724446	1	22	29.3113	Regulation of water loss via skin	http://amigo.geneontology.org/amigo/term/GO:0033561	STMN1
0.0724446	1	22	29.3113	Hydrogen peroxide metabolic process	http://amigo.geneontology.org/amigo/term/GO:0042743	CAT
0.0724446	1	22	29.3113	Erythrocyte development	http://amigo.geneontology.org/amigo/term/GO:0048821	KLF2
0.0724446	1	22	29.3113	Regulation of transcription initiation from RNA polymerase II promoter	http://amigo.geneontology.org/amigo/term/GO:0060260	POU5F1
0.0724605	4	796	3.24044	DOID:630 genetic disease	ftp://ftp.rgd.mcw.edu/pub/data_release	ETFB DPYD CP PAX6
0.0724605	6	1593	2.42881	Regulation of developmental process	http://amigo.geneontology.org/amigo/term/GO:0050793	POU5F1 NEFL PAX6 ARPC2 KLF2 NANOG
0.0732668	3	461	4.19641	Neutrophil degranulation	https://reactome.org/download/current	ACTR2 ARPC5 ACLY
0.0734627	2	188	6.86009	Lipid catabolic process	http://amigo.geneontology.org/amigo/term/GO:0016042	ETFA ETFB
0.0734627	2	188	6.86009	Gliogenesis	http://amigo.geneontology.org/amigo/term/GO:0042063	VIM PAX6
0.0734977	1	23	28.0369	Regulation of sprouting angiogenesis	http://amigo.geneontology.org/amigo/term/GO:1903670	KLF2
0.0734977	1	23	28.0369	Gluconeogenesis	https://reactome.org/download/current	ALDOB
0.0734977	1	23	28.0369	DOID:0050745 diffuse large B-cell lymphoma	ftp://ftp.rgd.mcw.edu/pub/data_release	CAT
0.0734977	1	23	28.0369	DOID:9004866 Ataxia	ftp://ftp.rgd.mcw.edu/pub/data_release	CP
0.0734977	1	23	28.0369	DOID:1307 dementia	ftp://ftp.rgd.mcw.edu/pub/data_release	CP
0.0734977	1	23	28.0369	DOID:13619 extrahepatic cholestasis	ftp://ftp.rgd.mcw.edu/pub/data_release	ALB
0.0734977	1	23	28.0369	PW:0001497 retinitis pigmentosa pathway	ftp://ftp.rgd.mcw.edu/pub/data_release	RPE65
0.0734977	1	23	28.0369	PW:0000041 fructose and mannose metabolic pathway	ftp://ftp.rgd.mcw.edu/pub/data_release	ALDOB
0.0734977	2	189	6.82379	Developmental maturation	http://amigo.geneontology.org/amigo/term/GO:0021700	NEFL KLF2
0.0734977	1	23	28.0369	Forebrain regionalization	http://amigo.geneontology.org/amigo/term/GO:0021871	PAX6
0.0734977	1	23	28.0369	Establishment of mitotic spindle orientation	http://amigo.geneontology.org/amigo/term/GO:0000132	PAX6
0.0734977	1	23	28.0369	Negative regulation of actin filament depolymerization	http://amigo.geneontology.org/amigo/term/GO:0030835	LIMA1
0.0734977	1	23	28.0369	Neuron projection regeneration	http://amigo.geneontology.org/amigo/term/GO:0031102	NEFL
0.0734977	1	23	28.0369	Negative regulation of actin filament bundle assembly	http://amigo.geneontology.org/amigo/term/GO:0032232	STMN1
0.0734977	1	23	28.0369	Nucleoside bisphosphate biosynthetic process	http://amigo.geneontology.org/amigo/term/GO:0033866	ACLY
0.0734977	1	23	28.0369	Ribonucleoside bisphosphate biosynthetic process	http://amigo.geneontology.org/amigo/term/GO:0034030	ACLY
0.0734977	1	23	28.0369	Purine nucleoside bisphosphate biosynthetic process	http://amigo.geneontology.org/amigo/term/GO:0034033	ACLY
0.0734977	4	803	3.2122	Biological process involved in interspecies interaction between organisms	http://amigo.geneontology.org/amigo/term/GO:0044419	ACTR2 VIM ACTR3 STMN1
0.0734977	1	23	28.0369	Regulation of neuroblast proliferation	http://amigo.geneontology.org/amigo/term/GO:1902692	PAX6
0.0735023	4	807	3.19628	Neuron differentiation	http://amigo.geneontology.org/amigo/term/GO:0030182	NEFL VIM PAX6 STMN1
0.0740085	3	468	4.13364	Cis-regulatory region sequence-specific DNA binding	http://amigo.geneontology.org/amigo/term/GO:0000987	POU5F1 PAX6 NANOG
0.074327	2	192	6.71717	DOID:3070 malignant glioma	ftp://ftp.rgd.mcw.edu/pub/data_release	CAT STMN1
0.074761	3	471	4.10732	Neuron projection	http://amigo.geneontology.org/amigo/term/GO:0043005	GPHN NEFL VIM
0.074761	4	813	3.17269	DNA-binding transcription factor activity	http://amigo.geneontology.org/amigo/term/GO:0003700	POU5F1 PAX6 KLF2 NANOG
0.074761	2	193	6.68237	Response to light stimulus	http://amigo.geneontology.org/amigo/term/GO:0009416	RPE65 CAT
0.074761	4	813	3.17269	Negative regulation of transcription, DNA-templated	http://amigo.geneontology.org/amigo/term/GO:0045892	POU5F1 PAX6 KLF2 NANOG
0.075013	4	816	3.16102	Negative regulation of nucleic acid-templated transcription	http://amigo.geneontology.org/amigo/term/GO:1903507	POU5F1 PAX6 KLF2 NANOG
0.075013	1	24	26.8687	NADP metabolic process	http://amigo.geneontology.org/amigo/term/GO:0006739	TKT
0.075013	1	24	26.8687	Oxidoreductase activity, acting on single donors with incorporation of molecular oxygen	http://amigo.geneontology.org/amigo/term/GO:0016701	RPE65
0.075013	1	24	26.8687	DOID:9000310 Lung Injury	ftp://ftp.rgd.mcw.edu/pub/data_release	ALB
0.075013	1	24	26.8687	DOID:5614 eye disease	ftp://ftp.rgd.mcw.edu/pub/data_release	GPHN
0.075013	1	24	26.8687	DOID:3602 toxic encephalopathy	ftp://ftp.rgd.mcw.edu/pub/data_release	CAT
0.075013	1	24	26.8687	DOID:9007402 Gliosis	ftp://ftp.rgd.mcw.edu/pub/data_release	VIM
0.075013	1	24	26.8687	2 -deoxyribonucleotide metabolic process	http://amigo.geneontology.org/amigo/term/GO:0009394	DPYD
0.075013	1	24	26.8687	Deoxyribose phosphate metabolic process	http://amigo.geneontology.org/amigo/term/GO:0019692	DPYD
0.075013	1	24	26.8687	Eye photoreceptor cell development	http://amigo.geneontology.org/amigo/term/GO:0042462	PAX6
0.075013	4	816	3.16102	Negative regulation of RNA biosynthetic process	http://amigo.geneontology.org/amigo/term/GO:1902679	POU5F1 PAX6 KLF2 NANOG
0.0752914	3	475	4.07273	Protein homodimerization activity	http://amigo.geneontology.org/amigo/term/GO:0042803	DPYD CAT TKT
0.0760643	2	197	6.54669	Acyltransferase activity	http://amigo.geneontology.org/amigo/term/GO:0016746	ACLY CS
0.0760643	2	197	6.54669	Metabolism of carbohydrates	https://reactome.org/download/current	TKT ALDOB
0.0760643	2	197	6.54669	Sensory organ morphogenesis	http://amigo.geneontology.org/amigo/term/GO:0090596	RPE65 PAX6
0.0760643	2	197	6.54669	Nuclear chromosome segregation	http://amigo.geneontology.org/amigo/term/GO:0098813	ACTR2 ACTR3
0.076588	2	198	6.51362	Fatty acid metabolic process	http://amigo.geneontology.org/amigo/term/GO:0006631	ETFA ETFB
0.076588	2	198	6.51362	Regulation of neurogenesis	http://amigo.geneontology.org/amigo/term/GO:0050767	NEFL PAX6
0.0769931	1	25	25.7939	Collecting duct acid secretion	http://www.genome.jp/kegg-bin/show_pathway?ssc04966	CA2
0.0769931	1	25	25.7939	Salivary gland morphogenesis	http://amigo.geneontology.org/amigo/term/GO:0007435	PAX6
0.0769931	1	25	25.7939	DOID:874 bacterial pneumonia	ftp://ftp.rgd.mcw.edu/pub/data_release	CAT
0.0769931	1	25	25.7939	DOID:9000972 Fever	ftp://ftp.rgd.mcw.edu/pub/data_release	VIM
0.0769931	1	25	25.7939	Intestinal absorption	http://amigo.geneontology.org/amigo/term/GO:0050892	LIMA1
0.0787342	4	838	3.07804	Sequence-specific double-stranded DNA binding	http://amigo.geneontology.org/amigo/term/GO:1990837	POU5F1 PAX6 KLF2 NANOG
0.0787342	1	26	24.8019	Maturity onset diabetes of the young	http://www.genome.jp/kegg-bin/show_pathway?ssc04950	PAX6
0.0787342	1	26	24.8019	DOID:9004590 Acute Liver Failure	ftp://ftp.rgd.mcw.edu/pub/data_release	ALB
0.0787342	1	26	24.8019	DOID:1287 cardiovascular system disease	ftp://ftp.rgd.mcw.edu/pub/data_release	ALB
0.0787342	1	26	24.8019	PW:0000054 tryptophan metabolic pathway	ftp://ftp.rgd.mcw.edu/pub/data_release	CAT
0.0787342	1	26	24.8019	PW:0000141 retinol metabolic pathway	ftp://ftp.rgd.mcw.edu/pub/data_release	RPE65
0.0787342	1	26	24.8019	Establishment of mitotic spindle localization	http://amigo.geneontology.org/amigo/term/GO:0040001	PAX6
0.0787342	1	26	24.8019	Regulation of ATPase activity	http://amigo.geneontology.org/amigo/term/GO:0043462	ALDOB
0.0787342	1	26	24.8019	Regulation of nitric oxide biosynthetic process	http://amigo.geneontology.org/amigo/term/GO:0045428	KLF2
0.0787342	1	26	24.8019	Embryonic eye morphogenesis	http://amigo.geneontology.org/amigo/term/GO:0048048	PAX6
0.0787342	1	26	24.8019	Response to axon injury	http://amigo.geneontology.org/amigo/term/GO:0048678	NEFL
0.0787342	1	26	24.8019	Establishment of spindle orientation	http://amigo.geneontology.org/amigo/term/GO:0051294	PAX6
0.0787342	3	488	3.96423	Defense response to other organism	http://amigo.geneontology.org/amigo/term/GO:0098542	ACTR2 VIM ACTR3
0.0787342	1	26	24.8019	Axonal transport	http://amigo.geneontology.org/amigo/term/GO:0098930	NEFL
0.0801905	3	493	3.92403	Response to organonitrogen compound	http://amigo.geneontology.org/amigo/term/GO:0010243	RPE65 CA2 VIM
0.0805973	1	27	23.8833	Microtubule depolymerization	http://amigo.geneontology.org/amigo/term/GO:0007019	STMN1
0.0805973	1	27	23.8833	Striated Muscle Contraction	https://reactome.org/download/current	VIM
0.0805973	1	27	23.8833	Salivary gland development	http://amigo.geneontology.org/amigo/term/GO:0007431	PAX6
0.0805973	1	27	23.8833	DOID:326 ischemia	ftp://ftp.rgd.mcw.edu/pub/data_release	CP
0.0805973	1	27	23.8833	DOID:2513 basal cell carcinoma	ftp://ftp.rgd.mcw.edu/pub/data_release	RPE65
0.0805973	1	27	23.8833	DOID:12361 Graves' disease	ftp://ftp.rgd.mcw.edu/pub/data_release	CAT
0.0805973	1	27	23.8833	DOID:3526 cerebral infarction	ftp://ftp.rgd.mcw.edu/pub/data_release	VIM
0.0805973	1	27	23.8833	DOID:9003566 Mesothelioma	ftp://ftp.rgd.mcw.edu/pub/data_release	CAT
0.0805973	1	27	23.8833	Cell fate determination	http://amigo.geneontology.org/amigo/term/GO:0001709	PAX6
0.0805973	1	27	23.8833	DOID:9008394 Drug-Induced Dyskinesia	ftp://ftp.rgd.mcw.edu/pub/data_release	CAT
0.0805973	1	27	23.8833	Negative regulation of microtubule polymerization or depolymerization	http://amigo.geneontology.org/amigo/term/GO:0031111	STMN1
0.0813891	5	1247	2.5856	Tissue development	http://amigo.geneontology.org/amigo/term/GO:0009888	POU5F1 VIM PAX6 KLF2 NANOG
0.0823148	1	28	23.0303	Pyrimidine nucleotide metabolic process	http://amigo.geneontology.org/amigo/term/GO:0006220	DPYD
0.0823148	1	28	23.0303	Regulation of DNA-templated transcription, initiation	http://amigo.geneontology.org/amigo/term/GO:2000142	POU5F1
0.0823148	1	28	23.0303	Peroxisomal membrane	http://amigo.geneontology.org/amigo/term/GO:0005778	CAT
0.0823148	1	28	23.0303	Brush border membrane	http://amigo.geneontology.org/amigo/term/GO:0031526	LIMA1
0.0823148	1	28	23.0303	Microbody membrane	http://amigo.geneontology.org/amigo/term/GO:0031903	CAT
0.0823148	1	28	23.0303	Cleavage furrow	http://amigo.geneontology.org/amigo/term/GO:0032154	LIMA1
0.0823148	1	28	23.0303	Interconversion of nucleotide diand triphosphates	https://reactome.org/download/current	RRM2
0.0823148	1	28	23.0303	DOID:1205 allergic hypersensitivity disease	ftp://ftp.rgd.mcw.edu/pub/data_release	ALB
0.0823148	1	28	23.0303	DOID:13141 uveitis	ftp://ftp.rgd.mcw.edu/pub/data_release	ALB
0.0823148	4	855	3.01684	Response to endogenous stimulus	http://amigo.geneontology.org/amigo/term/GO:0009719	RPE65 CA2 VIM NANOG
0.0823148	1	28	23.0303	Pituitary gland development	http://amigo.geneontology.org/amigo/term/GO:0021983	PAX6
0.0823148	1	28	23.0303	Regulation of nitric oxide metabolic process	http://amigo.geneontology.org/amigo/term/GO:0080164	KLF2
0.0845341	1	29	22.2362	Monocarboxylic acid binding	http://amigo.geneontology.org/amigo/term/GO:0033293	ALB
0.0845341	1	29	22.2362	DOID:863 nervous system disease	ftp://ftp.rgd.mcw.edu/pub/data_release	DPYD
0.0845341	1	29	22.2362	DOID:0050572 cone-rod dystrophy	ftp://ftp.rgd.mcw.edu/pub/data_release	RPE65
0.0845341	1	29	22.2362	DOID:12306 vitiligo	ftp://ftp.rgd.mcw.edu/pub/data_release	CAT
0.0845341	1	29	22.2362	Ribonucleoside monophosphate metabolic process	http://amigo.geneontology.org/amigo/term/GO:0009161	DPYD
0.0845341	1	29	22.2362	Embryonic camera-type eye development	http://amigo.geneontology.org/amigo/term/GO:0031076	PAX6
0.0845341	1	29	22.2362	Columnar/cuboidal epithelial cell development	http://amigo.geneontology.org/amigo/term/GO:0002066	PAX6
0.085917	2	218	5.91604	DOID:9008443 Colorectal Neoplasms	ftp://ftp.rgd.mcw.edu/pub/data_release	DPYD ALB
0.0861064	1	30	21.4949	Positive regulation of double-strand break repair	http://amigo.geneontology.org/amigo/term/GO:2000781	ACTR2
0.0861064	2	220	5.86226	Ubiquitin protein ligase binding	http://amigo.geneontology.org/amigo/term/GO:0031625	POU5F1 PAX6
0.0861064	4	877	2.94116	Transition metal ion binding	http://amigo.geneontology.org/amigo/term/GO:0046914	ACO2 SUOX CA2 CP
0.0861064	1	30	21.4949	DOID:10808 gastric ulcer	ftp://ftp.rgd.mcw.edu/pub/data_release	CAT
0.0861064	1	30	21.4949	DOID:1240 leukemia	ftp://ftp.rgd.mcw.edu/pub/data_release	ALB
0.0861064	1	30	21.4949	DOID:1168 familial hyperlipidemia	ftp://ftp.rgd.mcw.edu/pub/data_release	ALB
0.0861064	1	30	21.4949	DOID:10603 glucose intolerance	ftp://ftp.rgd.mcw.edu/pub/data_release	PAX6
0.0861064	1	30	21.4949	Ribonucleotide catabolic process	http://amigo.geneontology.org/amigo/term/GO:0009261	DPYD
0.0861064	2	219	5.88903	Regulation of neuron projection development	http://amigo.geneontology.org/amigo/term/GO:0010975	NEFL VIM
0.0861064	1	30	21.4949	PW:0001041 pathogenic Escherichia coli infection pathway	ftp://ftp.rgd.mcw.edu/pub/data_release	ARPC4
0.0861064	1	30	21.4949	Regulation of actin filament depolymerization	http://amigo.geneontology.org/amigo/term/GO:0030834	LIMA1
0.0861064	1	30	21.4949	Lung epithelium development	http://amigo.geneontology.org/amigo/term/GO:0060428	KLF2
0.0861064	5	1279	2.52091	Organic substance catabolic process	http://amigo.geneontology.org/amigo/term/GO:1901575	ETFA ETFB DPYD VIM ALDOB
0.0880946	1	31	20.8016	Cell division site	http://amigo.geneontology.org/amigo/term/GO:0032153	LIMA1
0.0880946	4	885	2.91457	Double-stranded DNA binding	http://amigo.geneontology.org/amigo/term/GO:0003690	POU5F1 PAX6 KLF2 NANOG
0.0880946	1	31	20.8016	Fatty acyl-CoA biosynthesis	https://reactome.org/download/current	ACLY
0.0880946	1	31	20.8016	DOID:9675 pulmonary emphysema	ftp://ftp.rgd.mcw.edu/pub/data_release	ALB
0.0880946	1	31	20.8016	Endocrine pancreas development	http://amigo.geneontology.org/amigo/term/GO:0031018	PAX6
0.0880946	3	523	3.69894	Chordate embryonic development	http://amigo.geneontology.org/amigo/term/GO:0043009	POU5F1 PAX6 KLF2
0.0880946	1	31	20.8016	Receptor clustering	http://amigo.geneontology.org/amigo/term/GO:0043113	GPHN
0.0880946	1	31	20.8016	Establishment of spindle localization	http://amigo.geneontology.org/amigo/term/GO:0051293	PAX6
0.0881119	4	887	2.908	Negative regulation of RNA metabolic process	http://amigo.geneontology.org/amigo/term/GO:0051253	POU5F1 PAX6 KLF2 NANOG
0.0893908	2	226	5.70662	Cilium assembly	http://amigo.geneontology.org/amigo/term/GO:0060271	ACTR2 ACTR3
0.0894261	1	32	20.1515	Fructose and mannose metabolism	http://www.genome.jp/kegg-bin/show_pathway?ssc00051	ALDOB
0.0894261	1	32	20.1515	Porphyrin and chlorophyll metabolism	http://www.genome.jp/kegg-bin/show_pathway?ssc00860	CP
0.0894261	1	32	20.1515	DOID:9004286 Hirschsprung Disease 1	ftp://ftp.rgd.mcw.edu/pub/data_release	DPYD
0.0894261	1	32	20.1515	DOID:1470 major depressive disorder	ftp://ftp.rgd.mcw.edu/pub/data_release	CAT
0.0894261	1	32	20.1515	DOID:9004547 Thyroid Neoplasms	ftp://ftp.rgd.mcw.edu/pub/data_release	CP
0.0894261	1	32	20.1515	DOID:9001472 Nasal Polyps	ftp://ftp.rgd.mcw.edu/pub/data_release	CAT
0.0894261	1	32	20.1515	Eye photoreceptor cell differentiation	http://amigo.geneontology.org/amigo/term/GO:0001754	PAX6
0.0894261	3	529	3.65699	Embryo development ending in birth or egg hatching	http://amigo.geneontology.org/amigo/term/GO:0009792	POU5F1 PAX6 KLF2
0.0894261	1	32	20.1515	Calcium-ion regulated exocytosis	http://amigo.geneontology.org/amigo/term/GO:0017156	POU5F1
0.0894261	1	32	20.1515	Forebrain neuron differentiation	http://amigo.geneontology.org/amigo/term/GO:0021879	PAX6
0.0894261	5	1299	2.4821	Cellular catabolic process	http://amigo.geneontology.org/amigo/term/GO:0044248	ETFA ETFB DPYD VIM CAT
0.0894261	1	32	20.1515	Purine-containing compound catabolic process	http://amigo.geneontology.org/amigo/term/GO:0072523	DPYD
0.0894261	1	32	20.1515	Positive regulation of substrate adhesion-dependent cell spreading	http://amigo.geneontology.org/amigo/term/GO:1900026	ARPC2
0.0908734	2	230	5.60738	Purine ribonucleotide metabolic process	http://amigo.geneontology.org/amigo/term/GO:0009150	ACLY ALDOB
0.0910915	1	33	19.5409	Core promoter sequence-specific DNA binding	http://amigo.geneontology.org/amigo/term/GO:0001046	PAX6
0.0910915	1	33	19.5409	Peroxidase activity	http://amigo.geneontology.org/amigo/term/GO:0004601	CAT
0.0910915	1	33	19.5409	Beta-Alanine metabolism	http://www.genome.jp/kegg-bin/show_pathway?ssc00410	DPYD
0.0910915	1	33	19.5409	DOID:1588 thrombocytopenia	ftp://ftp.rgd.mcw.edu/pub/data_release	ALB
0.0910915	1	33	19.5409	DOID:9008091 Optic Nerve Injuries	ftp://ftp.rgd.mcw.edu/pub/data_release	PAX6
0.0910915	1	33	19.5409	DOID:12894 Sjogren's syndrome	ftp://ftp.rgd.mcw.edu/pub/data_release	VIM
0.0910915	1	33	19.5409	DOID:9007409 Microphthalmia Syndromic 1	ftp://ftp.rgd.mcw.edu/pub/data_release	PAX6
0.0910915	1	33	19.5409	Detection of light stimulus	http://amigo.geneontology.org/amigo/term/GO:0009583	RPE65
0.0910915	2	231	5.5831	Negative regulation of organelle organization	http://amigo.geneontology.org/amigo/term/GO:0010639	STMN1 LIMA1
0.0910915	1	33	19.5409	Negative regulation of G protein-coupled receptor signaling pathway	http://amigo.geneontology.org/amigo/term/GO:0045744	STMN1
0.0917316	4	907	2.84387	Generation of neurons	http://amigo.geneontology.org/amigo/term/GO:0048699	NEFL VIM PAX6 STMN1
0.0925375	2	234	5.51153	Ubiquitin-like protein ligase binding	http://amigo.geneontology.org/amigo/term/GO:0044389	POU5F1 PAX6
0.0925453	1	34	18.9661	Polysome	http://amigo.geneontology.org/amigo/term/GO:0005844	VIM
0.0925453	1	34	18.9661	DOID:9005749 Necrosis	ftp://ftp.rgd.mcw.edu/pub/data_release	CAT
0.0925453	1	34	18.9661	DOID:1574 alcohol use disorder	ftp://ftp.rgd.mcw.edu/pub/data_release	GPHN
0.0925453	1	34	18.9661	Nucleoside metabolic process	http://amigo.geneontology.org/amigo/term/GO:0009116	DPYD
0.0925453	1	34	18.9661	PW:0000025 glycolysis/gluconeogenesis pathway	ftp://ftp.rgd.mcw.edu/pub/data_release	ALDOB
0.0925453	1	34	18.9661	Exocrine system development	http://amigo.geneontology.org/amigo/term/GO:0035272	PAX6
0.0925453	1	34	18.9661	Photoreceptor cell development	http://amigo.geneontology.org/amigo/term/GO:0042461	PAX6
0.0925453	1	34	18.9661	Regulation of transcription from RNA polymerase II promoter in response to stress	http://amigo.geneontology.org/amigo/term/GO:0043618	KLF2
0.0925453	4	913	2.82519	Positive regulation of molecular function	http://amigo.geneontology.org/amigo/term/GO:0044093	CAT PAX6 STMN1 ALDOB
0.0925453	1	34	18.9661	Positive regulation of DNA recombination	http://amigo.geneontology.org/amigo/term/GO:0045911	ACTR2
0.0925453	3	544	3.55615	Response to nitrogen compound	http://amigo.geneontology.org/amigo/term/GO:1901698	RPE65 CA2 VIM
0.0927884	2	236	5.46482	Chromosome segregation	http://amigo.geneontology.org/amigo/term/GO:0007059	ACTR2 ACTR3
0.0944912	1	35	18.4242	Regulation of transcription regulatory region DNA binding	http://amigo.geneontology.org/amigo/term/GO:2000677	PAX6
0.0944912	1	35	18.4242	Nitric oxide biosynthetic process	http://amigo.geneontology.org/amigo/term/GO:0006809	KLF2
0.0944912	1	35	18.4242	PW:0000016 amyotrophic lateral sclerosis pathway	ftp://ftp.rgd.mcw.edu/pub/data_release	CAT
0.0944912	1	35	18.4242	Actin filament depolymerization	http://amigo.geneontology.org/amigo/term/GO:0030042	LIMA1
0.0944912	1	35	18.4242	Endodermal cell differentiation	http://amigo.geneontology.org/amigo/term/GO:0035987	POU5F1
0.0944912	2	239	5.39622	Synapse organization	http://amigo.geneontology.org/amigo/term/GO:0050808	GPHN NEFL
0.0946949	3	551	3.51097	Positive regulation of cell differentiation	http://amigo.geneontology.org/amigo/term/GO:0045597	NEFL PAX6 ARPC2
0.0947541	5	1336	2.41336	Enzyme binding	http://amigo.geneontology.org/amigo/term/GO:0019899	POU5F1 ARPC4 CAT PAX6 ALDOB
0.0957587	3	554	3.49196	Growth	http://amigo.geneontology.org/amigo/term/GO:0040007	POU5F1 TKT KLF2
0.0961334	1	36	17.9125	Oxidoreductase activity, acting on peroxide as acceptor	http://amigo.geneontology.org/amigo/term/GO:0016684	CAT
0.0961334	1	36	17.9125	NADP binding	http://amigo.geneontology.org/amigo/term/GO:0050661	CAT
0.0961334	1	36	17.9125	DOID:9743 diabetic neuropathy	ftp://ftp.rgd.mcw.edu/pub/data_release	CAT
0.0961334	1	36	17.9125	Axo-dendritic transport	http://amigo.geneontology.org/amigo/term/GO:0008088	NEFL
0.0961334	1	36	17.9125	Ventral spinal cord development	http://amigo.geneontology.org/amigo/term/GO:0021517	PAX6
0.0961334	1	36	17.9125	Pigment biosynthetic process	http://amigo.geneontology.org/amigo/term/GO:0046148	RPE65
0.0961334	6	1787	2.16513	Cellular localization	http://amigo.geneontology.org/amigo/term/GO:0051641	GPHN ACTR2 ALB NEFL PAX6 ACTR3
0.0967523	2	244	5.28564	Cilium organization	http://amigo.geneontology.org/amigo/term/GO:0044782	ACTR2 ACTR3
0.0969807	3	559	3.46073	Negative regulation of apoptotic process	http://amigo.geneontology.org/amigo/term/GO:0043066	ALB NEFL CAT
0.0972589	2	245	5.26407	Purine nucleotide metabolic process	http://amigo.geneontology.org/amigo/term/GO:0006163	ACLY ALDOB
0.0977388	1	37	17.4283	Stress fiber	http://amigo.geneontology.org/amigo/term/GO:0001725	LIMA1
0.0977388	1	37	17.4283	Contractile actin filament bundle	http://amigo.geneontology.org/amigo/term/GO:0097517	LIMA1
0.0977388	1	37	17.4283	Retinoid metabolic process	http://amigo.geneontology.org/amigo/term/GO:0001523	RPE65
0.0977388	1	37	17.4283	DOID:11394 adult respiratory distress syndrome	ftp://ftp.rgd.mcw.edu/pub/data_release	ALB
0.0977388	1	37	17.4283	Neural tube patterning	http://amigo.geneontology.org/amigo/term/GO:0021532	PAX6
0.0977388	1	37	17.4283	Glandular epithelial cell differentiation	http://amigo.geneontology.org/amigo/term/GO:0002067	PAX6
0.0977388	1	37	17.4283	Negative regulation of Ras protein signal transduction	http://amigo.geneontology.org/amigo/term/GO:0046580	STMN1
0.0985792	2	248	5.20039	Postsynapse	http://amigo.geneontology.org/amigo/term/GO:0098794	GPHN NEFL
0.0989151	1	38	16.9697	Neuromuscular junction	http://amigo.geneontology.org/amigo/term/GO:0031594	NEFL
0.0989151	1	38	16.9697	DOID:4947 cholangiocarcinoma	ftp://ftp.rgd.mcw.edu/pub/data_release	ALB
0.0989151	1	38	16.9697	Endoderm formation	http://amigo.geneontology.org/amigo/term/GO:0001706	POU5F1
0.0989151	1	38	16.9697	Blastocyst formation	http://amigo.geneontology.org/amigo/term/GO:0001825	POU5F1
