# Supplementary material for: Proteomic landscape of porcine induced neural stem cell reprogramming and differentiation
Source: PeerJ. 2025 Oct 3;13:e20120. doi: 10.7717/peerj.20120 (PMC12499565; doi:10.7717/peerj.20120)
Supplement: Supplemental Information 6 [file peerj-13-20120-s006.xlsx]

## Sheet: Sheet 1
28 from 462 Proteins
	f.value	p.value	-log10(p)	FDR	Fisher's LSD
A0A4X1VDU1	172.87	1.3026e-07	6.8852	4.3141e-05	Diff-7 - Diff-15; iNS-7 - Diff-15; Diff-7 - iNS-15; iNS-7 - Diff-7; iNS-7 - iNS-15
A4D7T6	157.73	1.8676e-07	6.7287	4.3141e-05	Diff-15 - Diff-7; Diff-15 - iNS-15; Diff-15 - iNS-7
A0A4X1U976	140.85	2.9112e-07	6.5359	4.4833e-05	Diff-15 - Diff-7; Diff-15 - iNS-15; Diff-15 - iNS-7; iNS-7 - Diff-7; iNS-7 - iNS-15
A0A4X1SY39	116.96	6.0216e-07	6.2203	5.2949e-05	Diff-15 - Diff-7; Diff-15 - iNS-15; Diff-15 - iNS-7
D5KJI2	113.09	6.8671e-07	6.1632	5.2949e-05	Diff-7 - Diff-15; Diff-7 - iNS-15; Diff-7 - iNS-7
F1SM19	111.49	7.2591e-07	6.1391	5.2949e-05	Diff-7 - Diff-15; Diff-7 - iNS-15; Diff-7 - iNS-7
A0A4X1UFG6	108.66	8.0226e-07	6.0957	5.2949e-05	Diff-7 - Diff-15; Diff-7 - iNS-15; Diff-7 - iNS-7
A0A4X1V299	100.93	1.0691e-06	5.971	5.5697e-05	Diff-7 - Diff-15; Diff-7 - iNS-15; Diff-7 - iNS-7
A0A480TWI8	98.762	1.1634e-06	5.9343	5.5697e-05	Diff-7 - Diff-15; Diff-15 - iNS-15; Diff-15 - iNS-7; Diff-7 - iNS-15; Diff-7 - iNS-7
A0A4X1TBI0	97.86	1.2056e-06	5.9188	5.5697e-05	Diff-7 - Diff-15; iNS-15 - Diff-15; iNS-7 - Diff-15; Diff-7 - iNS-15; Diff-7 - iNS-7; iNS-15 - iNS-7
A0A4X1SKN4	66.297	5.4157e-06	5.2663	0.0002268	Diff-7 - Diff-15; Diff-7 - iNS-15; Diff-7 - iNS-7
P08132	64.857	5.8908e-06	5.2298	0.0002268	Diff-7 - Diff-15; Diff-7 - iNS-15; Diff-7 - iNS-7
F1RFN3	62.803	6.6624e-06	5.1764	0.00023677	Diff-7 - Diff-15; Diff-7 - iNS-15; Diff-7 - iNS-7
P50578	52.91	1.2791e-05	4.8931	0.0004221	Diff-7 - Diff-15; Diff-7 - iNS-15; Diff-7 - iNS-7
A0A5G2QKW4	51.934	1.3725e-05	4.8625	0.00042274	Diff-7 - Diff-15; Diff-7 - iNS-15; Diff-7 - iNS-7
A0A4X1USL6	49.122	1.694e-05	4.7711	0.0004714	Diff-15 - Diff-7; Diff-15 - iNS-15; Diff-15 - iNS-7; iNS-15 - iNS-7
A0A4X1UYU1	48.814	1.7346e-05	4.7608	0.0004714	Diff-15 - Diff-7; Diff-15 - iNS-15; Diff-15 - iNS-7
A0A4X1VTD8	45.717	2.2202e-05	4.6536	0.00056986	iNS-7 - Diff-15; iNS-7 - Diff-7; iNS-7 - iNS-15
I3LP11	44.216	2.5166e-05	4.5992	0.00061194	Diff-15 - Diff-7; Diff-15 - iNS-15; Diff-15 - iNS-7
A0A4X1TWR8	43.384	2.7022e-05	4.5683	0.00062421	Diff-7 - Diff-15; Diff-15 - iNS-15; Diff-15 - iNS-7; Diff-7 - iNS-15; Diff-7 - iNS-7
D0G778	41.5	3.1903e-05	4.4962	0.00070187	Diff-15 - Diff-7; Diff-15 - iNS-15; Diff-15 - iNS-7; Diff-7 - iNS-15; Diff-7 - iNS-7
A0A4X1T7I1	39.284	3.9147e-05	4.4073	0.00082208	Diff-7 - Diff-15; Diff-7 - iNS-15; Diff-7 - iNS-7
A0A480LD68	37.982	4.437e-05	4.3529	0.00082592	Diff-7 - Diff-15; iNS-15 - Diff-15; iNS-7 - Diff-15; Diff-7 - iNS-15; iNS-7 - iNS-15
C7AI81	37.957	4.4479e-05	4.3518	0.00082592	Diff-7 - Diff-15; iNS-15 - Diff-15; iNS-7 - Diff-15; iNS-15 - Diff-7; iNS-7 - Diff-7; iNS-7 - iNS-15
A0A4X1TYS6	37.599	4.6067e-05	4.3366	0.00082592	Diff-7 - Diff-15; iNS-15 - Diff-15; iNS-7 - Diff-15; iNS-15 - Diff-7; iNS-7 - Diff-7
A0A480V6V1	37.509	4.648e-05	4.3327	0.00082592	Diff-15 - Diff-7; Diff-15 - iNS-15; Diff-15 - iNS-7
Q6DUB7	35.34	5.7938e-05	4.237	0.00095992	Diff-15 - Diff-7; Diff-15 - iNS-15; Diff-15 - iNS-7; Diff-7 - iNS-7; iNS-15 - iNS-7
F1S6R1	35.301	5.8177e-05	4.2352	0.00095992	Diff-15 - Diff-7; Diff-15 - iNS-15; Diff-15 - iNS-7
22 from 69 Proteins
	f.value	p.value	-log10(p)	FDR	Fisher's LSD
F1RG87	197.94	7.6436e-08	7.1167	5.2741e-06	Diff-7 - Diff-15; Diff-7 - iNS-15; Diff-7 - iNS-7
F1S847	128.11	4.2191e-07	6.3748	1.1593e-05	Diff-7 - Diff-15; Diff-15 - iNS-15; Diff-15 - iNS-7; Diff-7 - iNS-15; Diff-7 - iNS-7
A0A5K1U8K2	114.62	6.5171e-07	6.1859	1.1593e-05	Diff-15 - Diff-7; Diff-15 - iNS-15; Diff-15 - iNS-7; Diff-7 - iNS-15; Diff-7 - iNS-7
A0A4X1VVQ4	113.72	6.7206e-07	6.1726	1.1593e-05	Diff-15 - Diff-7; Diff-15 - iNS-15; Diff-15 - iNS-7; Diff-7 - iNS-15; Diff-7 - iNS-7
A0A4X1UFC1	81.931	2.3988e-06	5.62	3.3103e-05	Diff-7 - Diff-15; Diff-7 - iNS-15; Diff-7 - iNS-7
A0A287BJC0	60.009	7.9259e-06	5.101	9.1148e-05	Diff-7 - Diff-15; Diff-7 - iNS-15; Diff-7 - iNS-7
A0A4X1T6W5	47.827	1.8735e-05	4.7273	0.00018467	Diff-15 - Diff-7; Diff-15 - iNS-15; Diff-15 - iNS-7
Q29229	44.603	2.4356e-05	4.6134	0.00019388	Diff-7 - Diff-15; Diff-15 - iNS-15; Diff-15 - iNS-7; Diff-7 - iNS-15; Diff-7 - iNS-7
A0A5G2QHQ3	44.158	2.5289e-05	4.5971	0.00019388	Diff-15 - Diff-7; Diff-15 - iNS-15; Diff-15 - iNS-7; Diff-7 - iNS-15; Diff-7 - iNS-7
A0A4X1TE38	39.803	3.7279e-05	4.4285	0.00022291	Diff-7 - Diff-15; Diff-15 - iNS-15; Diff-15 - iNS-7; Diff-7 - iNS-15; Diff-7 - iNS-7
F1SHK2	39.528	3.8253e-05	4.4173	0.00022291	Diff-15 - Diff-7; Diff-15 - iNS-15; Diff-15 - iNS-7; Diff-7 - iNS-15; Diff-7 - iNS-7
A0A4X1W3F4	39.324	3.8997e-05	4.409	0.00022291	Diff-7 - Diff-15; Diff-7 - iNS-15; Diff-7 - iNS-7
A0A480VK41	38.548	4.1997e-05	4.3768	0.00022291	Diff-15 - Diff-7; Diff-15 - iNS-15; Diff-15 - iNS-7; Diff-7 - iNS-15; Diff-7 - iNS-7
A0A5G2R862	37.099	4.8415e-05	4.315	0.00023861	Diff-7 - Diff-15; Diff-15 - iNS-15; Diff-15 - iNS-7; Diff-7 - iNS-15; Diff-7 - iNS-7
A0A4X1TRE4	36.149	5.3295e-05	4.2733	0.00024516	Diff-15 - Diff-7; Diff-15 - iNS-15; Diff-15 - iNS-7; Diff-7 - iNS-15; Diff-7 - iNS-7
F1S1X1	33.869	6.7768e-05	4.169	0.00029225	Diff-7 - Diff-15; Diff-15 - iNS-15; Diff-15 - iNS-7; Diff-7 - iNS-15; Diff-7 - iNS-7
I3LU62	31.719	8.621e-05	4.0644	0.00034991	Diff-15 - iNS-15; Diff-15 - iNS-7; Diff-7 - iNS-15; Diff-7 - iNS-7
F1SI85	29.776	0.00010857	3.9643	0.0004162	Diff-15 - iNS-15; Diff-15 - iNS-7; Diff-7 - iNS-15; Diff-7 - iNS-7
A0A5G2QXQ1	27.325	0.00014822	3.8291	0.00053828	Diff-7 - Diff-15; Diff-7 - iNS-15; Diff-7 - iNS-7
A0A287B182	25.686	0.00018519	3.7324	0.0006389	Diff-15 - iNS-15; Diff-15 - iNS-7; Diff-7 - iNS-15; Diff-7 - iNS-7
A0A4X1SNJ0	24.375	0.00022334	3.651	0.00073385	Diff-7 - Diff-15; Diff-7 - iNS-15; Diff-7 - iNS-7
A0A287A8U2	23.957	0.00023755	3.6243	0.00074503	Diff-7 - Diff-15; Diff-7 - iNS-15; Diff-7 - iNS-7
