# Supplementary material for: Proteomic landscape of porcine induced neural stem cell reprogramming and differentiation
Source: PeerJ. 2025 Oct 3;13:e20120. doi: 10.7717/peerj.20120 (PMC12499565; doi:10.7717/peerj.20120)
Supplement: Supplemental Information 7 [file peerj-13-20120-s007.xlsx]

## Sheet: Sheet1
Protein IDs	Proteins name	Fasta headers	Number of proteins	Peptides	Sequence coverage [%]	Mol. weight [kDa]	Sequence length	Q-value	Score	MS/MS count	LFQ intensity_PEF R1	LFQ intensity_PEF R2	LFQ intensity_PEF R3	LFQ intensity_iNS-7_R1	LFQ intensity_iNS-7_R2	LFQ intensity_iNS-7_R3	LFQ intensity_iNS-15_R1	LFQ intensity_iNS-15_R2	LFQ intensity_iNS-15_R3	LFQ intensity_Diff-7_R1	LFQ intensity_Diff-7_R2	LFQ intensity_Diff-7_R3	LFQ intensity_Diff-15_R1	LFQ intensity_Diff-15_R2	LFQ intensity_Diff-15_R3	Average_PEF	Average_iNS7	Average_iNS15	Average_Diff7	Average_Diff15	C: ANOVA Significant	N: ANOVA p value	T: Significant pairs
A0A4X1SY39	Profilin	tr|A0A4X1SY39|A0A4X1SY39_PIG Profilin OS=Sus scrofa OX=9823 GN=PFN2 PE=3 SV=1;tr|A0A5G2QQU9|A0A5G2QQU9_PIG Profilin OS=Sus scrofa OX=9823 GN=PFN2 PE=1 SV=1;tr|A0A4X1SZR4|A0A4X1SZR4_PIG Profilin OS=Sus scrofa OX=9823 GN=PFN2 PE=3 SV=1;tr|A0A4X1SZN9|A0A4X1SZ	5	3	27.5	9.8402	91	0.0026042	11.985	75	200100	169030	210847	150360	172780	380850	162140	244720	158520	203650	202840	311650	1406600	1454340	1249500	193326	234663	188460	239380	1.37015e+06	+	2.38305e-08	Diff-15_iNS-15;Diff-15_PEF;Diff-15_iNS-7;Diff-15_Diff-7
A0A4X1TYS6	Elongation factor 1-alpha	tr|A0A4X1TYS6|A0A4X1TYS6_PIG Elongation factor 1-alpha OS=Sus scrofa OX=9823 GN=EEF1A1 PE=3 SV=1;tr|A0A288CG57|A0A288CG57_PIG Elongation factor 1-alpha OS=Sus scrofa OX=9823 GN=EEF1A1 PE=1 SV=2;tr|Q0PY11|Q0PY11_PIG Elongation factor 1-alpha OS=Sus scrofa O	39	20	58.2	49.07	450	0	323.31	665	3354900	2901500	2188200	7348800	6852000	8068533	6158800	6698100	7876340	3965300	4474900	3294000	2229700	2796900	1374000	2.81487e+06	7423111	6911080	3911400	2.13353e+06	+	5.99905e-06	iNS-15_Diff-15;iNS-7_Diff-15;iNS-15_PEF;iNS-7_PEF;iNS-15_Diff-7;iNS-7_Diff-7
A0A480V6V1	Drebrin isoform a	tr|A0A480V6V1|A0A480V6V1_PIG Drebrin isoform a OS=Sus scrofa OX=9823 PE=4 SV=1;tr|A0A4X1SEQ0|A0A4X1SEQ0_PIG ADF-H domain-containing protein OS=Sus scrofa OX=9823 PE=4 SV=1;tr|A0A287A0I8|A0A287A0I8_PIG Drebrin 1 OS=Sus scrofa OX=9823 GN=DBN1 PE=1 SV=2;tr|A0	7	12	23.2	69.126	634	0	276.3	79	1352630	1165900	1446700	224950	113620	262600	353680	374180	452300	161410	137700	407000	1292430	1452920	1019900	1.32174e+06	200390	393387	235370	1.25508e+06	+	1.8329e-06	Diff-15_iNS-7;PEF_iNS-7;Diff-15_Diff-7;PEF_Diff-7;Diff-15_iNS-15;PEF_iNS-15
A4D7T6	Brain-type fatty acid-binding protein	tr|A4D7T6|A4D7T6_PIG Brain-type fatty acid-binding protein OS=Sus scrofa OX=9823 GN=fabp7 PE=2 SV=1;tr|A0A5K1UAQ7|A0A5K1UAQ7_PIG Fatty acid binding protein 7 OS=Sus scrofa OX=9823 GN=FABP7 PE=1 SV=1;tr|A0A4X1TN06|A0A4X1TN06_PIG FABP domain-containing prote	5	10	50.8	14.9	132	0	323.31	152	0	0	0	956200	709400	897700	1286600	1614100	1308400	1066400	967730	1361480	11332000	14234900	14111600		854433	1.40303e+06	1131870	1.32262e+07	+	4.20447e-09	Diff-15_PEF;Diff-15_iNS-7;Diff-15_Diff-7;Diff-15_iNS-15
C7AI81	Actin alpha 2	tr|C7AI81|C7AI81_PIG Actin alpha 2 OS=Sus scrofa OX=9823 GN=ACTA2 PE=2 SV=1;tr|A0A4X1V3S0|A0A4X1V3S0_PIG Uncharacterized protein OS=Sus scrofa OX=9823 GN=ACTA2 PE=3 SV=1;tr|A0A5G2QX85|A0A5G2QX85_PIG Actin alpha 2, smooth muscle OS=Sus scrofa OX=9823 GN=ACT	6	30	74.8	42.009	377	0	323.31	124	14925000	11298000	9922310	1154600	1343710	1150381	893020	532390	808800	533760	305640	598100	77022	76038	96027	1.20484e+07	1.21623e+06	744737	479167	83029	+	6.80477e-07	PEF_Diff-15;PEF_Diff-7;PEF_iNS-15;PEF_iNS-7
D0G778	Macrophage migration inhibitory factor (Fragment)	tr|D0G778|D0G778_PIG Macrophage migration inhibitory factor (Fragment) OS=Sus scrofa OX=9823 GN=MIF PE=2 SV=1;sp|P80928|MIF_PIG Macrophage migration inhibitory factor OS=Sus scrofa OX=9823 GN=MIF PE=1 SV=3;tr|A0A4X1V382|A0A4X1V382_PIG Uncharacterized prote	5	3	22	11.874	109	0.0033389	3.0611	55	335350	292910	340365	70666	86954	91597	39747	24013	23780	127010	257511	263060	515590	429000	395030	322875	83072.3	29180	215860	446540	+	3.53293e-06	Diff-7_iNS-15;PEF_iNS-15;Diff-15_iNS-15;PEF_iNS-7;Diff-15_iNS-7;Diff-15_Diff-7
F1S6R1	Cold-inducible RNA-binding protein	tr|F1S6R1|F1S6R1_PIG Cold-inducible RNA-binding protein OS=Sus scrofa OX=9823 GN=DAZAP1 PE=1 SV=1;tr|A0A4X1VVR9|A0A4X1VVR9_PIG Cold-inducible RNA-binding protein OS=Sus scrofa OX=9823 GN=DAZAP1 PE=4 SV=1;tr|F5BHI1|F5BHI1_PIG Cold-inducible RNA-binding prot	11	5	47.7	18.607	172	0	122.08	83	40078	213580	155490	196630	288701	338180	180170	387310	266740	297960	298920	343620	814590	784650	707650	136383	274504	278073	313500	768963	+	1.15887e-05	Diff-15_PEF;Diff-15_iNS-7;Diff-15_iNS-15;Diff-15_Diff-7
I3LP11	KH RNA binding domain containing, signal transduction associated 1	tr|I3LP11|I3LP11_PIG KH RNA binding domain containing, signal transduction associated 1 OS=Sus scrofa OX=9823 GN=KHDRBS1 PE=1 SV=1;tr|A0A287AWZ0|A0A287AWZ0_PIG KH RNA binding domain containing, signal transduction associated 1 OS=Sus scrofa OX=9823 GN=KHDR	4	3	14.7	48.197	443	0.0020161	5.1045	23	0	0	0	256460	163630	133000	120790	73863	114840	429780	263880	217440	930200	1300680	1343800		184363	103164	303700	1191560	+	1.39808e-06	Diff-15_PEF;Diff-15_iNS-15;Diff-15_iNS-7;Diff-15_Diff-7
A0A4X1TWR8	H15 domain-containing protein	tr|A0A4X1TWR8|A0A4X1TWR8_PIG H15 domain-containing protein OS=Sus scrofa OX=9823 GN=LOC100516295 PE=3 SV=1	1	5	22.9	22.524	214	0	43.8	80	122690	79472	120770	96038	94927	115200	108810	141600	103510	925580	1390700	1367650	639700	619060	473700	107644	102055	117973	1.22798e+06	577487	+	1.9916e-06	Diff-15_iNS-7;Diff-7_iNS-7;Diff-15_PEF;Diff-7_PEF;Diff-15_iNS-15;Diff-7_iNS-15;Diff-7_Diff-15
A0A5G2QKW4	Exosome component 3	tr|A0A5G2QKW4|A0A5G2QKW4_PIG Exosome component 3 OS=Sus scrofa OX=9823 GN=EXOSC3 PE=4 SV=1;tr|F1ST67|F1ST67_PIG Ribosomal RNA-processing protein 40 OS=Sus scrofa OX=9823 GN=EXOSC3 PE=3 SV=1;tr|A0A4X1UUF3|A0A4X1UUF3_PIG Ribosomal RNA-processing protein 40 O	3	1	9.1	17.212	164	0.0026596	12.757	20	52587	32568	178580	67624	75919	95710	66729	81260	13780	353175	468186	394290	131330	58008	70500	87911.7	79751	53923	405217	86612.7	+	3.03163e-05	Diff-7_iNS-15;Diff-7_iNS-7;Diff-7_Diff-15;Diff-7_PEF
A0A480TWI8	Histone H1.3	tr|A0A480TWI8|A0A480TWI8_PIG Histone H1.3 OS=Sus scrofa OX=9823 PE=3 SV=1;tr|A0A480TT26|A0A480TT26_PIG Histone H1.3 OS=Sus scrofa OX=9823 PE=3 SV=1;tr|A0A480PNM6|A0A480PNM6_PIG Histone H1.4 (Fragment) OS=Sus scrofa OX=9823 PE=3 SV=1;tr|Q53DY7|Q53DY7_PIG Hi	7	17	42.6	22.368	223	0.0031696	2.7083	44	0	0	0	114370	210483	283820	102710	295830	222140	6658100	5146800	6903000	1636100	1770250	1246200		202891	206893	6.23597e+06	1550850	+	3.95751e-08	Diff-7_PEF;Diff-7_iNS-7;Diff-7_iNS-15;Diff-7_Diff-15
F1RFN3	Nuclear receptor corepressor 2	tr|F1RFN3|F1RFN3_PIG Nuclear receptor corepressor 2 OS=Sus scrofa OX=9823 GN=NCOR2 PE=3 SV=4;tr|A0A4X1UPU1|A0A4X1UPU1_PIG Uncharacterized protein OS=Sus scrofa OX=9823 PE=3 SV=1;tr|Q19LF1|Q19LF1_PIG Nuclear receptor corepressor 2 OS=Sus scrofa OX=9823 GN=N	23	4	2.1	267.25	2450	0.040331	1.2706	5	33541	64930	38930	89557	17033	21602	28485	16719	22522	1720400	1295400	1816000	468260	150310	173720	45800.3	42730.7	22575.3	1610600	264097	+	4.37089e-07	Diff-7_iNS-15;Diff-7_iNS-7;Diff-7_PEF;Diff-7_Diff-15
F1SM19	J domain-containing protein	tr|F1SM19|F1SM19_PIG J domain-containing protein OS=Sus scrofa OX=9823 GN=DNAJB3 PE=4 SV=2	1	1	5.1	28.192	254	0.52721	0.26091	2	158400	17639	38374	53321	5082.2	26049	270710	570870	228770	4372400	3366700	3987300	489390	709711	203620	71471	28150.7	356783	3908800	467574	+	2.7748e-08	Diff-7_iNS-7;Diff-7_PEF;Diff-7_iNS-15;Diff-7_Diff-15
P08132	Annexin A4	sp|P08132|ANXA4_PIG Annexin A4 OS=Sus scrofa OX=9823 GN=ANXA4 PE=1 SV=2;tr|D0G0C5|D0G0C5_PIG Annexin OS=Sus scrofa OX=9823 GN=ANXA4 PE=2 SV=1;tr|A0A287B583|A0A287B583_PIG Annexin OS=Sus scrofa OX=9823 GN=ANXA4 PE=3 SV=2;tr|A0A287AYJ2|A0A287AYJ2_PIG Annexin	5	2	8.2	35.828	319	0.0053333	1.9324	18	80239	56434	83814	51964	48827	51485	36065	44621	34701	172329	197000	224710	38930	74630	59380	73495.7	50758.7	38462.3	198013	57646.7	+	1.34523e-06	Diff-7_iNS-15;Diff-7_iNS-7;Diff-7_Diff-15;Diff-7_PEF
Q6DUB7	Stathmin	sp|Q6DUB7|STMN1_PIG Stathmin OS=Sus scrofa OX=9823 GN=STMN1 PE=2 SV=3;tr|A0A5S6HQM6|A0A5S6HQM6_PIG Stathmin OS=Sus scrofa OX=9823 GN=STMN1 PE=1 SV=1	9	9	38.3	17.302	149	0	91.282	302	535860	625850	1446000	1607300	2225200	2128700	11905500	12555400	9526200	11573200	12539200	10411000	17681900	14954800	12467000	869237	1.98707e+06	1.1329e+07	11507800	1.50346e+07	+	8.79395e-07	iNS-15_PEF;Diff-7_PEF;Diff-15_PEF;iNS-15_iNS-7;Diff-7_iNS-7;Diff-15_iNS-7
A0A5G2QHQ3	Cadherin related family member 2	tr|A0A5G2QHQ3|A0A5G2QHQ3_PIG Cadherin related family member 2 OS=Sus scrofa OX=9823 GN=CDHR2 PE=1 SV=1;tr|A0A5G2RLG3|A0A5G2RLG3_PIG Cadherin related family member 2 OS=Sus scrofa OX=9823 GN=CDHR2 PE=1 SV=1;tr|A0A480ZRP0|A0A480ZRP0_PIG Cadherin-related fami	15	1	1.1	128.74	1186	0.13857	0.81423	2	0	0	0	0	0	0	0	0	0	18480000	15920000	13462000	23364000	17334000	26039000				15954000	2.22457e+07	+	3.89386e-07	Diff-7_PEF;Diff-15_PEF;Diff-7_iNS-7;Diff-15_iNS-7;Diff-7_iNS-15;Diff-15_iNS-15
A0A5K1U8K2	Nuclear receptor coactivator 7	tr|A0A5K1U8K2|A0A5K1U8K2_PIG Nuclear receptor coactivator 7 OS=Sus scrofa OX=9823 GN=NCOA7 PE=3 SV=1;tr|A0A480DG34|A0A480DG34_PIG Nuclear receptor coactivator 7 isoform X2 OS=Sus scrofa OX=9823 PE=3 SV=1;tr|A0A286ZLV9|A0A286ZLV9_PIG Nuclear receptor coacti	4	1	1.5	105.36	932	0.59689	0.18592	2	0	0	0	0	0	0	0	0	0	100230	142350	155470	433750	420710	341270				132683	398577	+	1.18203e-08	Diff-7_PEF;Diff-15_PEF;Diff-7_iNS-7;Diff-15_iNS-7;Diff-7_iNS-15;Diff-15_iNS-15;Diff-15_Diff-7
A0A287B182	Transmembrane protein 263	tr|A0A287B182|A0A287B182_PIG Transmembrane protein 263 OS=Sus scrofa OX=9823 GN=TMEM263 PE=1 SV=1;tr|A0A4X1WCX7|A0A4X1WCX7_PIG Uncharacterized protein OS=Sus scrofa OX=9823 GN=TMEM263 PE=3 SV=1;tr|A0A5G2QVT2|A0A5G2QVT2_PIG Transmembrane protein 263 OS=Sus	3	2	22.4	11.691	116	0.18911	0.67622	4	0	0	0	0	0	0	0	0	0	64668	129740	139880	187556	138320	141667				111429	155848	+	7.76269e-06	Diff-7_PEF;Diff-15_PEF;Diff-7_iNS-7;Diff-15_iNS-7;Diff-7_iNS-15;Diff-15_iNS-15
A0A480VK41	Calcium-binding mitochondrial carrier protein SCaMC-3	tr|A0A480VK41|A0A480VK41_PIG Calcium-binding mitochondrial carrier protein SCaMC-3 OS=Sus scrofa OX=9823 PE=3 SV=1;tr|F1SBS5|F1SBS5_PIG Solute carrier family 25 member 23 OS=Sus scrofa OX=9823 GN=SLC25A23 PE=3 SV=3;tr|B2MUB7|B2MUB7_PIG Small calcium-bindin	8	2	4.7	47.791	427	0.28466	0.5806	2	0	0	0	0	0	0	0	0	0	95716	50023	94501	322700	200150	265740				80080	262863	+	2.59622e-06	Diff-15_PEF;Diff-15_iNS-7;Diff-15_iNS-15;Diff-15_Diff-7
F1SHK2	MAP3K12 binding inhibitory protein 1	tr|F1SHK2|F1SHK2_PIG MAP3K12 binding inhibitory protein 1 OS=Sus scrofa OX=9823 GN=MBIP PE=4 SV=3;tr|A0A5G2RC08|A0A5G2RC08_PIG MAP3K12 binding inhibitory protein 1 OS=Sus scrofa OX=9823 GN=MBIP PE=4 SV=1;tr|A0A4X1TCY1|A0A4X1TCY1_PIG Uncharacterized protein	9	2	11.4	35.561	315	0.18716	0.68291	2	0	0	0	0	0	0	0	0	0	552400	534990	734800	801200	1114100	1236800				607397	1050700	+	8.82694e-07	Diff-7_PEF;Diff-15_PEF;Diff-7_iNS-7;Diff-15_iNS-7;Diff-7_iNS-15;Diff-15_iNS-15;Diff-15_Diff-7
F1SI85	Phosphoinositide phospholipase C	tr|F1SI85|F1SI85_PIG Phosphoinositide phospholipase C OS=Sus scrofa OX=9823 GN=PLCL1 PE=1 SV=3;tr|A0A4X1VE58|A0A4X1VE58_PIG Phosphoinositide phospholipase C OS=Sus scrofa OX=9823 GN=PLCL1 PE=4 SV=1	2	1	1.3	112.54	987	0.45023	0.3417	7	358955	1053800	869751	0	0	0	0	0	0	318040	376130	331660	277267	377880	494960	760835			341943	383369	+	0.00129538	PEF_iNS-7;PEF_iNS-15
I3LU62	Potassium calcium-activated channel subfamily M regulatory beta subunit 3	tr|I3LU62|I3LU62_PIG Potassium calcium-activated channel subfamily M regulatory beta subunit 3 OS=Sus scrofa OX=9823 GN=KCNMB3 PE=3 SV=2;tr|A0A4X1V4U8|A0A4X1V4U8_PIG tRNA-synt_1g domain-containing protein OS=Sus scrofa OX=9823 GN=KCNMB3 PE=3 SV=1	2	2	8.2	33.209	293	0.47503	0.31423	2	0	0	0	0	0	0	0	0	0	320280	294870	437310	328130	232980	360790				350820	307300	+	1.67584e-06	Diff-15_PEF;Diff-7_PEF;Diff-15_iNS-7;Diff-7_iNS-7;Diff-15_iNS-15;Diff-7_iNS-15
Q29229	Orf protein (Fragment)	tr|Q29229|Q29229_PIG Orf protein (Fragment) OS=Sus scrofa OX=9823 GN=orf PE=2 SV=1	1	1	9.8	19.446	184	0.58433	0.20287	1	0	0	0	0	0	0	0	0	0	526550	528880	710370	329650	244330	411190				588600	328390	+	6.26551e-07	Diff-15_PEF;Diff-7_PEF;Diff-15_iNS-7;Diff-7_iNS-7;Diff-15_iNS-15;Diff-7_iNS-15;Diff-7_Diff-15
A0A4X1T6W5	Dolichyl-phosphate-mannose--protein mannosyltransferase	tr|A0A4X1T6W5|A0A4X1T6W5_PIG Dolichyl-phosphate-mannose--protein mannosyltransferase OS=Sus scrofa OX=9823 PE=3 SV=1	1	2	3.5	93.848	837	0.13962	0.8093	4	1450900	1930364	1332840	0	0	0	0	0	0	82058	103090	200990	3736300	5277300	3355700	1571368			128713	4123100	+	3.27035e-06	Diff-15_iNS-7;Diff-15_iNS-15;Diff-15_Diff-7;Diff-15_PEF
A0A4X1TE38	Ribonuclease	tr|A0A4X1TE38|A0A4X1TE38_PIG Ribonuclease OS=Sus scrofa OX=9823 GN=RNASEH2A PE=3 SV=1	1	1	3.3	30.478	274	0.64782	0.096889	1	0	0	0	0	0	0	0	0	0	311730	288450	427910	43031	126800	109220				342697	93017	+	2.61016e-06	Diff-7_PEF;Diff-7_iNS-7;Diff-7_iNS-15;Diff-7_Diff-15
A0A4X1W3F4	UPAR/Ly6 domain-containing protein	tr|A0A4X1W3F4|A0A4X1W3F4_PIG UPAR/Ly6 domain-containing protein OS=Sus scrofa OX=9823 GN=LYPD4 PE=4 SV=1	1	1	3.3	30.191	275	0.45726	0.33211	1	134820	40374	66855	0	0	0	0	0	0	236380	180190	301740	50407	25452	23361	80683			239437	33073.3	+	4.28896e-05	Diff-7_iNS-7;Diff-7_iNS-15;Diff-7_Diff-15;Diff-7_PEF
A0A5G2R862	Phospholipase B-like	tr|A0A5G2R862|A0A5G2R862_PIG Phospholipase B-like OS=Sus scrofa OX=9823 GN=PLBD2 PE=1 SV=1;tr|A0A4X1TGV5|A0A4X1TGV5_PIG Phospholipase B-like OS=Sus scrofa OX=9823 GN=PLBD2 PE=3 SV=1;tr|F1RKC7|F1RKC7_PIG Phospholipase B-like OS=Sus scrofa OX=9823 GN=PLBD2 P	6	1	2.2	59.227	536	0.28611	0.57812	2	0	0	0	0	0	0	0	0	0	75787	51876	82577	32285	35862	22101				70080	30082.7	+	2.10469e-06	Diff-15_PEF;Diff-7_PEF;Diff-15_iNS-7;Diff-7_iNS-7;Diff-15_iNS-15;Diff-7_iNS-15;Diff-7_Diff-15
A0A287BJC0	Zinc finger homeobox 4	tr|A0A287BJC0|A0A287BJC0_PIG Zinc finger homeobox 4 OS=Sus scrofa OX=9823 GN=ZFHX4 PE=4 SV=1;tr|A0A4X1UK52|A0A4X1UK52_PIG Uncharacterized protein OS=Sus scrofa OX=9823 PE=4 SV=1	2	3	1.5	394.55	3585	0.0099133	1.7144	4	26526	80435	8647	0	0	0	0	0	0	372650	274846	406490	46165	56881	96027	38536			351329	66357.7	+	1.60479e-06	Diff-7_iNS-7;Diff-7_iNS-15;Diff-7_PEF;Diff-7_Diff-15
F1S1X1	Maspardin	tr|F1S1X1|F1S1X1_PIG Maspardin OS=Sus scrofa OX=9823 GN=SPG21 PE=4 SV=2;tr|A0A4X1U5P4|A0A4X1U5P4_PIG Maspardin OS=Sus scrofa OX=9823 GN=SPG21 PE=4 SV=1	2	1	2.3	44.375	394	0.44079	0.35086	2	0	0	0	0	0	0	0	0	0	7052000	4329200	5511000	2807400	1777100	2754900				5.63073e+06	2.44647e+06	+	3.20534e-06	Diff-15_PEF;Diff-7_PEF;Diff-15_iNS-7;Diff-7_iNS-7;Diff-15_iNS-15;Diff-7_iNS-15;Diff-7_Diff-15
F1S847	Alpha-internexin	tr|F1S847|F1S847_PIG Alpha-internexin OS=Sus scrofa OX=9823 GN=INA PE=1 SV=1;tr|A0A4X1TQZ8|A0A4X1TQZ8_PIG IF rod domain-containing protein OS=Sus scrofa OX=9823 GN=INA PE=3 SV=1;tr|A0A480ZXV2|A0A480ZXV2_PIG Alpha-internexin OS=Sus scrofa OX=9823 PE=4 SV=1	4	10	21.6	55.391	499	0.0017331	3.3697	29	0	0	0	0	0	0	0	0	0	231830	270310	265590	95405	137620	146537				255910	126521	+	4.37144e-09	Diff-15_PEF;Diff-7_PEF;Diff-15_iNS-7;Diff-7_iNS-7;Diff-15_iNS-15;Diff-7_iNS-15;Diff-7_Diff-15
