# Supplementary material for: Proteomic landscape of porcine induced neural stem cell reprogramming and differentiation
Source: PeerJ. 2025 Oct 3;13:e20120. doi: 10.7717/peerj.20120 (PMC12499565; doi:10.7717/peerj.20120)
Supplement: Supplemental Information 8 [file peerj-13-20120-s008.xlsx]

## Sheet: Sheet1
Enrichment FDR	nGenes	Pathway Genes	Fold Enrichment	Pathway	URL	Genes
1.52492e-23	12	20	224	Exosome (RNase complex)	http://amigo.geneontology.org/amigo/term/GO:0000178	EXOSC6 EXOSC5 EXOSC10 DIS3L EXOSC3 EXOSC2 EXOSC4 EXOSC9 EXOSC8 DIS3 EXOSC1 EXOSC7
1.7756e-23	12	21	213.333	Exoribonuclease complex	http://amigo.geneontology.org/amigo/term/GO:1905354	EXOSC6 EXOSC5 EXOSC10 DIS3L EXOSC3 EXOSC2 EXOSC4 EXOSC9 EXOSC8 DIS3 EXOSC1 EXOSC7
8.19625e-23	11	16	256.667	Tristetraprolin (TTP ZFP36) binds and destabilizes mRNA	https://reactome.org/download/current	EXOSC6 EXOSC5 EXOSC3 EXOSC2 EXOSC4 EXOSC9 EXOSC8 DIS3 EXOSC1 EXOSC7 ZFP36
6.38725e-21	10	14	266.667	KSRP (KHSRP) binds and destabilizes mRNA	https://reactome.org/download/current	EXOSC6 EXOSC5 EXOSC3 EXOSC2 EXOSC4 EXOSC9 EXOSC8 DIS3 EXOSC1 EXOSC7
3.39286e-20	10	16	233.333	MRNA decay by 3' to 5' exoribonuclease	https://reactome.org/download/current	EXOSC6 EXOSC5 EXOSC3 EXOSC2 EXOSC4 EXOSC9 EXOSC8 DIS3 EXOSC1 EXOSC7
3.39286e-20	10	16	233.333	Butyrate Response Factor 1 (BRF1) binds and destabilizes mRNA	https://reactome.org/download/current	EXOSC6 EXOSC5 EXOSC3 EXOSC2 EXOSC4 EXOSC9 EXOSC8 DIS3 EXOSC1 EXOSC7
4.17603e-18	13	75	64.7111	RNA degradation	http://www.genome.jp/kegg-bin/show_pathway?ssc03018	EXOSC6 EXOSC5 EXOSC10 DIS3L EXOSC3 EXOSC2 EXOSC4 EXOSC9 EXOSC8 DIS3 EXOSC1 EXOSC7 C1D
1.55103e-17	11	40	102.667	Regulation of mRNA stability by proteins that bind AU-rich elements	https://reactome.org/download/current	EXOSC6 EXOSC5 EXOSC3 EXOSC2 EXOSC4 EXOSC9 EXOSC8 DIS3 EXOSC1 EXOSC7 ZFP36
1.86439e-16	25	970	9.62199	Catalytic complex	http://amigo.geneontology.org/amigo/term/GO:1902494	EP300 SIN3A EXOSC6 EXOSC5 EXOSC10 HDAC1 DIS3L EXOSC3 EXOSC2 EXOSC4 ACTB EXOSC9 EXOSC8 DIS3 EXOSC1 EXOSC7 TBL1XR1 RBBP7 HDAC3 HDAC5 KAT2B HDAC4 HDAC7 ZFP36 YY1
1.44603e-15	9	24	140	Notch-HLH transcription pathway	https://reactome.org/download/current	HDAC1 NCOR2 TBL1XR1 HDAC3 HDAC5 NCOR1 KAT2B HDAC4 TBL1X
2.45839e-14	23	951	9.02909	Negative regulation of cellular macromolecule biosynthetic process	http://amigo.geneontology.org/amigo/term/GO:2000113	PPARA EP300 SIN3A EXOSC5 EXOSC10 HDAC1 EXOSC3 EXOSC9 NCOR2 TBL1XR1 BCL6 RBBP7 AR RELA HDAC3 RARA HDAC4 ESR1 HDAC7 ZFP36 ZBTB16 THRB YY1
2.70377e-14	23	959	8.95377	Negative regulation of macromolecule biosynthetic process	http://amigo.geneontology.org/amigo/term/GO:0010558	PPARA EP300 SIN3A EXOSC5 EXOSC10 HDAC1 EXOSC3 EXOSC9 NCOR2 TBL1XR1 BCL6 RBBP7 AR RELA HDAC3 RARA HDAC4 ESR1 HDAC7 ZFP36 ZBTB16 THRB YY1
4.3351e-14	10	54	69.1358	Deadenylation-dependent mRNA decay	https://reactome.org/download/current	EXOSC6 EXOSC5 EXOSC3 EXOSC2 EXOSC4 EXOSC9 EXOSC8 DIS3 EXOSC1 EXOSC7
4.8298e-14	23	992	8.65591	Negative regulation of cellular biosynthetic process	http://amigo.geneontology.org/amigo/term/GO:0031327	PPARA EP300 SIN3A EXOSC5 EXOSC10 HDAC1 EXOSC3 EXOSC9 NCOR2 TBL1XR1 BCL6 RBBP7 AR RELA HDAC3 RARA HDAC4 ESR1 HDAC7 ZFP36 ZBTB16 THRB YY1
6.23918e-14	23	1007	8.52698	Negative regulation of biosynthetic process	http://amigo.geneontology.org/amigo/term/GO:0009890	PPARA EP300 SIN3A EXOSC5 EXOSC10 HDAC1 EXOSC3 EXOSC9 NCOR2 TBL1XR1 BCL6 RBBP7 AR RELA HDAC3 RARA HDAC4 ESR1 HDAC7 ZFP36 ZBTB16 THRB YY1
1.02903e-13	19	594	11.9416	Negative regulation of transcription by RNA polymerase II	http://amigo.geneontology.org/amigo/term/GO:0000122	PPARA EP300 SIN3A HDAC1 NCOR2 TBL1XR1 BCL6 RBBP7 AR RELA HDAC3 RARA HDAC4 ESR1 HDAC7 ZFP36 ZBTB16 THRB YY1
8.98033e-13	27	1746	5.7732	Negative regulation of macromolecule metabolic process	http://amigo.geneontology.org/amigo/term/GO:0010605	PPARA EP300 SIN3A EXOSC5 EXOSC10 HDAC1 NCOA7 EXOSC3 EXOSC4 ANXA4 EXOSC9 NCOR2 TBL1XR1 BCL6 RBBP7 AR RELA HDAC3 RARA KAT2B HDAC4 ESR1 HDAC7 ZFP36 ZBTB16 THRB YY1
1.70494e-12	25	1475	6.32768	Negative regulation of nitrogen compound metabolic process	http://amigo.geneontology.org/amigo/term/GO:0051172	PPARA EP300 SIN3A EXOSC5 EXOSC10 HDAC1 NCOA7 EXOSC3 EXOSC9 NCOR2 TBL1XR1 BCL6 RBBP7 AR RELA HDAC3 RARA KAT2B HDAC4 ESR1 HDAC7 ZFP36 ZBTB16 THRB YY1
3.11621e-12	21	957	8.19227	Negative regulation of nucleobase-containing compound metabolic process	http://amigo.geneontology.org/amigo/term/GO:0045934	PPARA EP300 SIN3A EXOSC10 HDAC1 NCOR2 TBL1XR1 BCL6 RBBP7 AR RELA HDAC3 RARA KAT2B HDAC4 ESR1 HDAC7 ZFP36 ZBTB16 THRB YY1
3.86075e-12	12	172	26.0465	Major pathway of rRNA processing in the nucleolus and cytosol	https://reactome.org/download/current	EXOSC6 EXOSC5 EXOSC10 EXOSC3 EXOSC2 EXOSC4 EXOSC9 EXOSC8 DIS3 EXOSC1 EXOSC7 C1D
3.86075e-12	12	172	26.0465	RRNA processing	https://reactome.org/download/current	EXOSC6 EXOSC5 EXOSC10 EXOSC3 EXOSC2 EXOSC4 EXOSC9 EXOSC8 DIS3 EXOSC1 EXOSC7 C1D
3.86075e-12	12	172	26.0465	RRNA processing in the nucleus and cytosol	https://reactome.org/download/current	EXOSC6 EXOSC5 EXOSC10 EXOSC3 EXOSC2 EXOSC4 EXOSC9 EXOSC8 DIS3 EXOSC1 EXOSC7 C1D
4.3124e-12	15	368	15.2174	Chromatin binding	http://amigo.geneontology.org/amigo/term/GO:0003682	EP300 MBD6 SIN3A HDAC1 BCL6 AR RELA HDAC3 RARA KAT2B HDAC4 ESR1 HDAC7 THRB YY1
6.26974e-12	27	1917	5.25822	Negative regulation of metabolic process	http://amigo.geneontology.org/amigo/term/GO:0009892	PPARA EP300 SIN3A EXOSC5 EXOSC10 HDAC1 NCOA7 EXOSC3 EXOSC4 ANXA4 EXOSC9 NCOR2 TBL1XR1 BCL6 RBBP7 AR RELA HDAC3 RARA KAT2B HDAC4 ESR1 HDAC7 ZFP36 ZBTB16 THRB YY1
6.35771e-12	7	20	130.667	Regulation of lipid metabolism by Peroxisome proliferator-activated receptor alpha (PPARalpha)	https://reactome.org/download/current	PPARA SIN3A NCOR2 TBL1XR1 HDAC3 NCOR1 TBL1X
6.84416e-12	20	887	8.41789	Negative regulation of RNA metabolic process	http://amigo.geneontology.org/amigo/term/GO:0051253	PPARA EP300 SIN3A HDAC1 NCOR2 TBL1XR1 BCL6 RBBP7 AR RELA HDAC3 RARA KAT2B HDAC4 ESR1 HDAC7 ZFP36 ZBTB16 THRB YY1
8.73879e-12	25	1613	5.78632	Negative regulation of cellular metabolic process	http://amigo.geneontology.org/amigo/term/GO:0031324	PPARA EP300 SIN3A EXOSC5 EXOSC10 HDAC1 NCOA7 EXOSC3 EXOSC9 NCOR2 TBL1XR1 BCL6 RBBP7 AR RELA HDAC3 RARA KAT2B HDAC4 ESR1 HDAC7 ZFP36 ZBTB16 THRB YY1
1.6817e-11	19	816	8.69281	Negative regulation of nucleic acid-templated transcription	http://amigo.geneontology.org/amigo/term/GO:1903507	PPARA EP300 SIN3A HDAC1 NCOR2 TBL1XR1 BCL6 RBBP7 AR RELA HDAC3 RARA HDAC4 ESR1 HDAC7 ZFP36 ZBTB16 THRB YY1
1.6817e-11	19	813	8.72489	Negative regulation of transcription, DNA-templated	http://amigo.geneontology.org/amigo/term/GO:0045892	PPARA EP300 SIN3A HDAC1 NCOR2 TBL1XR1 BCL6 RBBP7 AR RELA HDAC3 RARA HDAC4 ESR1 HDAC7 ZFP36 ZBTB16 THRB YY1
1.6817e-11	19	816	8.69281	Negative regulation of RNA biosynthetic process	http://amigo.geneontology.org/amigo/term/GO:1902679	PPARA EP300 SIN3A HDAC1 NCOR2 TBL1XR1 BCL6 RBBP7 AR RELA HDAC3 RARA HDAC4 ESR1 HDAC7 ZFP36 ZBTB16 THRB YY1
1.75772e-11	8	42	71.1111	Histone deacetylase complex	http://amigo.geneontology.org/amigo/term/GO:0000118	SIN3A HDAC1 TBL1XR1 RBBP7 HDAC3 HDAC5 HDAC4 HDAC7
2.12846e-10	17	702	9.04084	Generic Transcription Pathway	https://reactome.org/download/current	PPARA EP300 SIN3A HDAC1 NCOR2 PPARG TBL1XR1 RBBP7 HDAC3 HDAC5 RARA NCOR1 KAT2B HDAC4 RBBP4 THRB TBL1X
2.35208e-10	18	826	8.13559	Nuclear protein-containing complex	http://amigo.geneontology.org/amigo/term/GO:0140513	EP300 SIN3A EXOSC10 HDAC1 EXOSC3 EXOSC2 ACTB EXOSC9 DIS3 TBL1XR1 RBBP7 RELA HDAC3 HDAC5 KAT2B HDAC4 HDAC7 YY1
2.396e-10	22	1386	5.92593	Regulation of transcription by RNA polymerase II	http://amigo.geneontology.org/amigo/term/GO:0006357	PPARA EP300 SIN3A HDAC1 NCOA7 ANXA4 NCOR2 TBL1XR1 BCL6 RBBP7 AR RELA HDAC3 RARA KAT2B HDAC4 ESR1 HDAC7 ZFP36 ZBTB16 THRB YY1
3.36682e-10	20	1113	6.7086	Transcription regulator activity	http://amigo.geneontology.org/amigo/term/GO:0140110	PPARA EP300 SIN3A HDAC1 NCOA7 NCOR2 PPARG TBL1XR1 BCL6 AR RELA HDAC3 RARA KAT2B HDAC4 ESR1 HDAC7 ZBTB16 THRB YY1
3.60109e-10	16	619	9.64997	Negative regulation of gene expression	http://amigo.geneontology.org/amigo/term/GO:0010629	PPARA EXOSC5 EXOSC10 HDAC1 EXOSC3 EXOSC4 ANXA4 EXOSC9 NCOR2 BCL6 RARA KAT2B ESR1 HDAC7 ZFP36 YY1
5.40662e-10	5	8	233.333	Nuclear exosome (RNase complex)	http://amigo.geneontology.org/amigo/term/GO:0000176	EXOSC10 EXOSC3 EXOSC2 EXOSC9 DIS3
5.91842e-10	22	1459	5.62943	Transcription by RNA polymerase II	http://amigo.geneontology.org/amigo/term/GO:0006366	PPARA EP300 SIN3A HDAC1 NCOA7 ANXA4 NCOR2 TBL1XR1 BCL6 RBBP7 AR RELA HDAC3 RARA KAT2B HDAC4 ESR1 HDAC7 ZFP36 ZBTB16 THRB YY1
6.8181e-10	17	765	8.2963	Chromosome	http://amigo.geneontology.org/amigo/term/GO:0005694	SIN3A EXOSC5 EXOSC10 HDAC1 EXOSC3 EXOSC4 EXOSC9 EXOSC8 NCOR2 BCL6 RBBP7 AR RELA RARA KAT2B ESR1 YY1
6.84289e-10	18	891	7.54209	Gene expression (Transcription)	https://reactome.org/download/current	PPARA EP300 SIN3A HDAC1 ACTB NCOR2 PPARG TBL1XR1 RBBP7 HDAC3 HDAC5 RARA NCOR1 KAT2B HDAC4 RBBP4 THRB TBL1X
9.81299e-10	8	70	42.6667	Protein deacetylation	http://amigo.geneontology.org/amigo/term/GO:0006476	EP300 SIN3A HDAC1 BCL6 HDAC3 HDAC5 HDAC4 HDAC7
9.81299e-10	13	370	13.1171	Transcription factor binding	http://amigo.geneontology.org/amigo/term/GO:0008134	PPARA EP300 SIN3A HDAC1 ACTB ANXA4 AR RELA HDAC3 RARA KAT2B HDAC4 ESR1
1.35426e-09	8	73	40.9132	HDACs deacetylate histones	https://reactome.org/download/current	HDAC1 NCOR2 TBL1XR1 RBBP7 HDAC3 NCOR1 RBBP4 TBL1X
1.76618e-09	17	819	7.74929	RNA Polymerase II Transcription	https://reactome.org/download/current	PPARA EP300 SIN3A HDAC1 NCOR2 PPARG TBL1XR1 RBBP7 HDAC3 HDAC5 RARA NCOR1 KAT2B HDAC4 RBBP4 THRB TBL1X
1.96389e-09	7	45	58.0741	Transcription repressor complex	http://amigo.geneontology.org/amigo/term/GO:0017053	SIN3A HDAC1 NCOR2 TBL1XR1 HDAC3 HDAC4 ZBTB16
2.63376e-09	8	80	37.3333	Protein deacylation	http://amigo.geneontology.org/amigo/term/GO:0035601	EP300 SIN3A HDAC1 BCL6 HDAC3 HDAC5 HDAC4 HDAC7
2.63376e-09	8	80	37.3333	Macromolecule deacylation	http://amigo.geneontology.org/amigo/term/GO:0098732	EP300 SIN3A HDAC1 BCL6 HDAC3 HDAC5 HDAC4 HDAC7
3.63346e-09	20	1292	5.77915	Positive regulation of nucleobase-containing compound metabolic process	http://amigo.geneontology.org/amigo/term/GO:0045935	PPARA EP300 SIN3A EXOSC6 EXOSC5 HDAC1 NCOA7 EXOSC3 EXOSC9 TBL1XR1 AR RELA HDAC3 RARA KAT2B HDAC4 ESR1 ZFP36 ZBTB16 THRB
4.4416e-09	13	423	11.4736	Chromatin	http://amigo.geneontology.org/amigo/term/GO:0000785	SIN3A EXOSC5 EXOSC10 HDAC1 EXOSC3 EXOSC4 NCOR2 RBBP7 AR RELA RARA ESR1 YY1
6.34827e-09	19	1181	6.00621	Positive regulation of RNA metabolic process	http://amigo.geneontology.org/amigo/term/GO:0051254	PPARA EP300 SIN3A EXOSC5 HDAC1 NCOA7 EXOSC3 EXOSC9 TBL1XR1 AR RELA HDAC3 RARA KAT2B HDAC4 ESR1 ZFP36 ZBTB16 THRB
7.20997e-09	10	199	18.7605	Chromatin modifying enzymes	https://reactome.org/download/current	EP300 HDAC1 NCOR2 TBL1XR1 RBBP7 RELA HDAC3 NCOR1 RBBP4 TBL1X
7.20997e-09	10	199	18.7605	Chromatin organization	https://reactome.org/download/current	EP300 HDAC1 NCOR2 TBL1XR1 RBBP7 RELA HDAC3 NCOR1 RBBP4 TBL1X
1.35843e-08	4	5	298.667	DNA deamination	http://amigo.geneontology.org/amigo/term/GO:0045006	EXOSC6 EXOSC5 EXOSC3 EXOSC4
2.03279e-08	11	298	13.7808	Transcription regulator complex	http://amigo.geneontology.org/amigo/term/GO:0005667	EP300 SIN3A HDAC1 NCOR2 TBL1XR1 RBBP7 RELA HDAC3 HDAC4 ZBTB16 YY1
2.39882e-08	6	35	64	Nuclear receptor activity	http://amigo.geneontology.org/amigo/term/GO:0004879	PPARA PPARG AR RARA ESR1 THRB
2.39882e-08	6	35	64	Ligand-activated transcription factor activity	http://amigo.geneontology.org/amigo/term/GO:0098531	PPARA PPARG AR RARA ESR1 THRB
2.69317e-08	5	16	116.667	Transcriptionally active chromatin	http://amigo.geneontology.org/amigo/term/GO:0035327	EXOSC5 EXOSC10 EXOSC3 EXOSC4 ESR1
4.34433e-08	8	116	25.7471	Thyroid hormone signaling pathway	http://www.genome.jp/kegg-bin/show_pathway?ssc04919	EP300 SIN3A HDAC1 ACTB HDAC3 KAT2B ESR1 THRB
5.79307e-08	9	179	18.7709	RNA catabolic process	http://amigo.geneontology.org/amigo/term/GO:0006401	EXOSC5 EXOSC10 DIS3L EXOSC3 EXOSC4 EXOSC9 EXOSC8 DIS3 ZFP36
9.00757e-08	5	20	93.3333	Histone deacetylase activity	http://amigo.geneontology.org/amigo/term/GO:0004407	HDAC1 HDAC3 HDAC5 HDAC4 HDAC7
9.40159e-08	6	44	50.9091	Nuclear Receptor transcription pathway	https://reactome.org/download/current	PPARA NCOR2 PPARG RARA NCOR1 THRB
1.14178e-07	5	21	88.8889	Protein deacetylase activity	http://amigo.geneontology.org/amigo/term/GO:0033558	HDAC1 HDAC3 HDAC5 HDAC4 HDAC7
1.39955e-07	13	573	8.47004	Metabolism of RNA	https://reactome.org/download/current	EXOSC6 EXOSC5 EXOSC10 EXOSC3 EXOSC2 EXOSC4 EXOSC9 EXOSC8 DIS3 EXOSC1 EXOSC7 ZFP36 C1D
1.4285e-07	5	22	84.8485	NcRNA catabolic process	http://amigo.geneontology.org/amigo/term/GO:0034661	EXOSC10 DIS3L EXOSC3 EXOSC9 DIS3
1.72994e-07	6	49	45.7143	Histone deacetylation	http://amigo.geneontology.org/amigo/term/GO:0016575	HDAC1 BCL6 HDAC3 HDAC5 HDAC4 HDAC7
1.76639e-07	5	23	81.1594	NF-kappaB binding	http://amigo.geneontology.org/amigo/term/GO:0051059	EP300 HDAC1 ANXA4 RELA HDAC3
2.63081e-07	10	296	12.6126	NcRNA metabolic process	http://amigo.geneontology.org/amigo/term/GO:0034660	EXOSC10 DIS3L EXOSC3 EXOSC4 CDK5RAP1 EXOSC9 DIS3 RELA KAT2B KCNMB3
2.64692e-07	4	9	165.926	RRNA catabolic process	http://amigo.geneontology.org/amigo/term/GO:0016075	EXOSC10 DIS3L EXOSC9 DIS3
2.90396e-07	10	300	12.4444	Cellular response to hormone stimulus	http://amigo.geneontology.org/amigo/term/GO:0032870	EP300 HDAC1 NCOR2 AR RELA RARA KAT2B ESR1 ZFP36 THRB
3.14757e-07	10	303	12.3212	Transcription coregulator activity	http://amigo.geneontology.org/amigo/term/GO:0003712	EP300 SIN3A HDAC1 NCOA7 NCOR2 TBL1XR1 HDAC3 KAT2B HDAC4 HDAC7
3.54577e-07	8	155	19.2688	SUMO E3 ligases SUMOylate target proteins	https://reactome.org/download/current	PPARA EP300 SIN3A HDAC1 RELA RARA HDAC4 THRB
4.44161e-07	7	102	25.6209	RRNA metabolic process	http://amigo.geneontology.org/amigo/term/GO:0016072	EXOSC10 DIS3L EXOSC3 EXOSC4 EXOSC9 DIS3 KAT2B
4.64799e-07	8	161	18.5507	SUMOylation	https://reactome.org/download/current	PPARA EP300 SIN3A HDAC1 RELA RARA HDAC4 THRB
5.29356e-07	7	105	24.8889	Transcription corepressor activity	http://amigo.geneontology.org/amigo/term/GO:0003714	SIN3A HDAC1 NCOR2 TBL1XR1 HDAC3 HDAC4 HDAC7
5.75002e-07	8	166	17.992	Viral carcinogenesis	http://www.genome.jp/kegg-bin/show_pathway?ssc05203	EP300 HDAC1 RELA HDAC3 HDAC5 KAT2B HDAC4 HDAC7
5.98304e-07	21	1972	3.97566	Positive regulation of nitrogen compound metabolic process	http://amigo.geneontology.org/amigo/term/GO:0051173	PPARA EP300 SIN3A EXOSC6 EXOSC5 HDAC1 NCOA7 EXOSC3 EXOSC9 TBL1XR1 BCL6 AR RELA HDAC3 RARA KAT2B HDAC4 ESR1 ZFP36 ZBTB16 THRB
6.55391e-07	14	796	6.56616	DOID:630 genetic disease	ftp://ftp.rgd.mcw.edu/pub/data_release	EP300 SIN3A HDAC1 EXOSC3 ACTB TBL1XR1 SYP AR HDAC3 GFAP HDAC4 THRB YY1 TH
6.80581e-07	6	63	35.5556	DOID:9256 colorectal cancer	ftp://ftp.rgd.mcw.edu/pub/data_release	EP300 HDAC1 PPARG HDAC3 HDAC5 HDAC7
7.01845e-07	10	334	11.1776	Histone modification	http://amigo.geneontology.org/amigo/term/GO:0016570	EP300 SIN3A MBIP HDAC1 BCL6 HDAC3 HDAC5 KAT2B HDAC4 HDAC7
7.01845e-07	3	3	373.333	CUT catabolic process	http://amigo.geneontology.org/amigo/term/GO:0071034	EXOSC10 EXOSC3 DIS3
7.01845e-07	3	3	373.333	CUT metabolic process	http://amigo.geneontology.org/amigo/term/GO:0071043	EXOSC10 EXOSC3 DIS3
7.06295e-07	5	31	60.2151	Deacetylase activity	http://amigo.geneontology.org/amigo/term/GO:0019213	HDAC1 HDAC3 HDAC5 HDAC4 HDAC7
7.63843e-07	9	250	13.44	Nucleobase-containing compound catabolic process	http://amigo.geneontology.org/amigo/term/GO:0034655	EXOSC5 EXOSC10 DIS3L EXOSC3 EXOSC4 EXOSC9 EXOSC8 DIS3 ZFP36
8.26926e-07	4	12	124.444	DOID:14557 primary pulmonary hypertension	ftp://ftp.rgd.mcw.edu/pub/data_release	HDAC1 PPARG HDAC5 HDAC4
8.26926e-07	4	12	124.444	Negative regulation of pri-miRNA transcription by RNA polymerase II	http://amigo.geneontology.org/amigo/term/GO:1902894	PPARA RELA HDAC4 YY1
1.27658e-06	10	359	10.3993	Response to hormone	http://amigo.geneontology.org/amigo/term/GO:0009725	EP300 HDAC1 NCOR2 AR RELA RARA KAT2B ESR1 ZFP36 THRB
1.3617e-06	6	72	31.1111	Nuclear-transcribed mRNA catabolic process	http://amigo.geneontology.org/amigo/term/GO:0000956	EXOSC5 EXOSC10 EXOSC3 EXOSC4 EXOSC9 ZFP36
1.3617e-06	9	269	12.4907	Heterocycle catabolic process	http://amigo.geneontology.org/amigo/term/GO:0046700	EXOSC5 EXOSC10 DIS3L EXOSC3 EXOSC4 EXOSC9 EXOSC8 DIS3 ZFP36
1.38194e-06	9	270	12.4444	Cellular nitrogen compound catabolic process	http://amigo.geneontology.org/amigo/term/GO:0044270	EXOSC5 EXOSC10 DIS3L EXOSC3 EXOSC4 EXOSC9 EXOSC8 DIS3 ZFP36
1.53977e-06	14	863	6.05639	Positive regulation of transcription by RNA polymerase II	http://amigo.geneontology.org/amigo/term/GO:0045944	PPARA EP300 SIN3A HDAC1 NCOA7 TBL1XR1 AR RELA HDAC3 RARA KAT2B HDAC4 ESR1 THRB
1.70498e-06	7	128	20.4167	RNA polymerase II-specific DNA-binding transcription factor binding	http://amigo.geneontology.org/amigo/term/GO:0061629	EP300 HDAC1 ACTB ANXA4 RELA HDAC3 ESR1
1.7172e-06	9	278	12.0863	Aromatic compound catabolic process	http://amigo.geneontology.org/amigo/term/GO:0019439	EXOSC5 EXOSC10 DIS3L EXOSC3 EXOSC4 EXOSC9 EXOSC8 DIS3 ZFP36
2.41452e-06	3	4	280	Nuclear RNA surveillance	http://amigo.geneontology.org/amigo/term/GO:0071027	EXOSC10 EXOSC4 EXOSC9
2.41452e-06	3	4	280	Nuclear mRNA surveillance	http://amigo.geneontology.org/amigo/term/GO:0071028	EXOSC10 EXOSC4 EXOSC9
2.48036e-06	7	136	19.2157	PW:0001338 histone modification pathway	ftp://ftp.rgd.mcw.edu/pub/data_release	EP300 HDAC1 HDAC3 HDAC5 KAT2B HDAC4 HDAC7
2.65444e-06	9	294	11.4286	Organic cyclic compound catabolic process	http://amigo.geneontology.org/amigo/term/GO:1901361	EXOSC5 EXOSC10 DIS3L EXOSC3 EXOSC4 EXOSC9 EXOSC8 DIS3 ZFP36
2.68464e-06	6	82	27.3171	Histone deacetylase binding	http://amigo.geneontology.org/amigo/term/GO:0042826	HDAC1 NCOR2 RELA HDAC3 KAT2B HDAC4
2.68464e-06	7	138	18.9372	Neutrophil extracellular trap formation	http://www.genome.jp/kegg-bin/show_pathway?ssc04613	HDAC1 ACTB RELA HDAC3 HDAC5 HDAC4 HDAC7
3.37981e-06	4	17	87.8431	MRNA 3 -UTR AU-rich region binding	http://amigo.geneontology.org/amigo/term/GO:0035925	EXOSC4 EXOSC9 EXOSC8 ZFP36
3.76064e-06	15	1096	5.10949	Positive regulation of nucleic acid-templated transcription	http://amigo.geneontology.org/amigo/term/GO:1903508	PPARA EP300 SIN3A HDAC1 NCOA7 TBL1XR1 AR RELA HDAC3 RARA KAT2B HDAC4 ESR1 ZBTB16 THRB
3.76064e-06	12	651	6.88172	Transcription cis-regulatory region binding	http://amigo.geneontology.org/amigo/term/GO:0000976	PPARA HDAC1 TBL1XR1 BCL6 AR RELA RARA KAT2B HDAC4 ESR1 ZBTB16 YY1
3.76064e-06	12	652	6.87117	Transcription regulatory region nucleic acid binding	http://amigo.geneontology.org/amigo/term/GO:0001067	PPARA HDAC1 TBL1XR1 BCL6 AR RELA RARA KAT2B HDAC4 ESR1 ZBTB16 YY1
3.76064e-06	15	1096	5.10949	Positive regulation of transcription, DNA-templated	http://amigo.geneontology.org/amigo/term/GO:0045893	PPARA EP300 SIN3A HDAC1 NCOA7 TBL1XR1 AR RELA HDAC3 RARA KAT2B HDAC4 ESR1 ZBTB16 THRB
3.76884e-06	15	1097	5.10483	Positive regulation of RNA biosynthetic process	http://amigo.geneontology.org/amigo/term/GO:1902680	PPARA EP300 SIN3A HDAC1 NCOA7 TBL1XR1 AR RELA HDAC3 RARA KAT2B HDAC4 ESR1 ZBTB16 THRB
4.49717e-06	16	1282	4.65939	Cell development	http://amigo.geneontology.org/amigo/term/GO:0048468	EP300 SIN3A HDAC1 BCL6 OLIG1 AR MAP2 GFAP RARA HDAC4 ESR1 STMN1 ZBTB16 THRB YY1 TH
4.63811e-06	6	91	24.6154	DOID:12858 Huntington's disease	ftp://ftp.rgd.mcw.edu/pub/data_release	EP300 SIN3A HDAC1 HDAC3 MAP2 HDAC7
5.16057e-06	7	154	16.9697	Intracellular receptor signaling pathway	http://amigo.geneontology.org/amigo/term/GO:0030522	EP300 HDAC1 NCOR2 AR RELA RARA ESR1
5.5831e-06	7	156	16.7521	DNA-binding transcription factor binding	http://amigo.geneontology.org/amigo/term/GO:0140297	EP300 HDAC1 ACTB ANXA4 RELA HDAC3 ESR1
6.02204e-06	11	554	7.41276	Growth	http://amigo.geneontology.org/amigo/term/GO:0040007	EP300 SIN3A EXOSC2 EXOSC4 EXOSC9 BCL6 RBBP7 AR CDHR2 RARA ESR1
6.18585e-06	11	556	7.38609	RNA polymerase II transcription regulatory region sequence-specific DNA binding	http://amigo.geneontology.org/amigo/term/GO:0000977	PPARA HDAC1 BCL6 AR RELA RARA KAT2B HDAC4 ESR1 ZBTB16 YY1
6.19442e-06	14	983	5.31706	Sequence-specific DNA binding	http://amigo.geneontology.org/amigo/term/GO:0043565	PPARA HDAC1 PPARG TBL1XR1 BCL6 AR RELA RARA KAT2B HDAC4 ESR1 ZBTB16 THRB YY1
6.6488e-06	10	441	8.46561	DOID:684 hepatocellular carcinoma	ftp://ftp.rgd.mcw.edu/pub/data_release	EP300 ACTB PPARG AR RARA KAT2B HDAC4 ESR1 STMN1 TH
6.77449e-06	13	838	5.79157	Sequence-specific double-stranded DNA binding	http://amigo.geneontology.org/amigo/term/GO:1990837	PPARA HDAC1 TBL1XR1 BCL6 AR RELA RARA KAT2B HDAC4 ESR1 ZBTB16 THRB YY1
6.89227e-06	10	444	8.40841	RNA polymerase II cis-regulatory region sequence-specific DNA binding	http://amigo.geneontology.org/amigo/term/GO:0000978	PPARA HDAC1 BCL6 AR RELA RARA HDAC4 ESR1 ZBTB16 YY1
6.89227e-06	17	1514	4.19199	DNA binding	http://amigo.geneontology.org/amigo/term/GO:0003677	PPARA EP300 MBD6 SIN3A HDAC1 PPARG TBL1XR1 BCL6 AR RELA RARA KAT2B HDAC4 ESR1 ZBTB16 THRB YY1
7.13337e-06	16	1336	4.47106	Enzyme binding	http://amigo.geneontology.org/amigo/term/GO:0019899	PPARA HDAC1 DIS3L ACTB NCOR2 AR RELA HDAC3 RARA KAT2B HDAC4 ESR1 HDAC7 ZFP36 THRB TH
7.25454e-06	5	52	35.8974	Chromatin DNA binding	http://amigo.geneontology.org/amigo/term/GO:0031490	EP300 BCL6 RELA RARA THRB
7.48435e-06	7	165	15.8384	Transcriptional misregulation in cancer	http://www.genome.jp/kegg-bin/show_pathway?ssc05202	SIN3A HDAC1 PPARG BCL6 RELA RARA ZBTB16
8.49428e-06	18	1733	3.87767	Regulation of multicellular organismal process	http://amigo.geneontology.org/amigo/term/GO:0051239	PPARA EXOSC6 HDAC1 EXOSC3 ANXA4 BCL6 AR RELA GFAP RARA HDAC4 ESR1 HDAC7 ZFP36 ZBTB16 THRB YY1 TH
9.34306e-06	3	6	186.667	Exonucleolytic catabolism of deadenylated mRNA	http://amigo.geneontology.org/amigo/term/GO:0043928	EXOSC5 EXOSC3 EXOSC9
9.34306e-06	3	6	186.667	RNA surveillance	http://amigo.geneontology.org/amigo/term/GO:0071025	EXOSC10 EXOSC4 EXOSC9
1.00829e-05	4	23	64.9275	SUMOylation of intracellular receptors	https://reactome.org/download/current	PPARA RARA HDAC4 THRB
1.04443e-05	10	468	7.97721	Cis-regulatory region sequence-specific DNA binding	http://amigo.geneontology.org/amigo/term/GO:0000987	PPARA HDAC1 BCL6 AR RELA RARA HDAC4 ESR1 ZBTB16 YY1
1.0916e-05	5	57	32.7485	Hydrolase activity, acting on carbon-nitrogen (but not peptide) bonds, in linear amides	http://amigo.geneontology.org/amigo/term/GO:0016811	HDAC1 HDAC3 HDAC5 HDAC4 HDAC7
1.09402e-05	7	176	14.8485	Negative regulation of cytokine production	http://amigo.geneontology.org/amigo/term/GO:0001818	PPARA ANXA4 BCL6 RARA HDAC7 ZFP36 YY1
1.13103e-05	13	885	5.48399	Double-stranded DNA binding	http://amigo.geneontology.org/amigo/term/GO:0003690	PPARA HDAC1 TBL1XR1 BCL6 AR RELA RARA KAT2B HDAC4 ESR1 ZBTB16 THRB YY1
1.13333e-05	6	109	20.5505	Cellular response to steroid hormone stimulus	http://amigo.geneontology.org/amigo/term/GO:0071383	EP300 HDAC1 NCOR2 AR ESR1 ZFP36
1.30449e-05	15	1228	4.56026	Positive regulation of macromolecule biosynthetic process	http://amigo.geneontology.org/amigo/term/GO:0010557	PPARA EP300 SIN3A HDAC1 NCOA7 TBL1XR1 AR RELA HDAC3 RARA KAT2B HDAC4 ESR1 ZBTB16 THRB
1.35965e-05	12	751	5.96538	RNA binding	http://amigo.geneontology.org/amigo/term/GO:0003723	EP300 DIS3L EXOSC3 EXOSC2 EXOSC4 EXOSC9 EXOSC8 DIS3 EXOSC1 RBBP7 ZFP36 YY1
1.51894e-05	3	7	160	Nuclear-transcribed mRNA catabolic process, exonucleolytic	http://amigo.geneontology.org/amigo/term/GO:0000291	EXOSC5 EXOSC3 EXOSC9
2.14971e-05	4	28	53.3333	Regulation of TP53 Activity through Acetylation	https://reactome.org/download/current	EP300 HDAC1 RBBP7 RBBP4
2.2019e-05	15	1283	4.36477	Positive regulation of cellular biosynthetic process	http://amigo.geneontology.org/amigo/term/GO:0031328	PPARA EP300 SIN3A HDAC1 NCOA7 TBL1XR1 AR RELA HDAC3 RARA KAT2B HDAC4 ESR1 ZBTB16 THRB
2.21944e-05	12	789	5.67807	Cellular response to endogenous stimulus	http://amigo.geneontology.org/amigo/term/GO:0071495	PPARA EP300 HDAC1 ACTB NCOR2 AR RELA RARA KAT2B ESR1 ZFP36 THRB
2.43299e-05	4	29	51.4943	Response to estrogen	http://amigo.geneontology.org/amigo/term/GO:0043627	EP300 AR RARA ESR1
2.46678e-05	11	653	6.28892	Nucleolus	http://amigo.geneontology.org/amigo/term/GO:0005730	MBD6 MBIP EXOSC5 EXOSC10 EXOSC3 EXOSC2 EXOSC9 EXOSC8 EXOSC1 BCL6 RARA
2.54357e-05	8	294	10.1587	Cellular response to lipid	http://amigo.geneontology.org/amigo/term/GO:0071396	EP300 HDAC1 NCOR2 AR RELA RARA ESR1 ZFP36
2.55223e-05	15	1302	4.30108	Positive regulation of biosynthetic process	http://amigo.geneontology.org/amigo/term/GO:0009891	PPARA EP300 SIN3A HDAC1 NCOA7 TBL1XR1 AR RELA HDAC3 RARA KAT2B HDAC4 ESR1 ZBTB16 THRB
2.56575e-05	6	127	17.6378	Response to steroid hormone	http://amigo.geneontology.org/amigo/term/GO:0048545	EP300 HDAC1 NCOR2 AR ESR1 ZFP36
3.09489e-05	4	31	48.172	Nuclear-transcribed mRNA catabolic process, deadenylation-dependent decay	http://amigo.geneontology.org/amigo/term/GO:0000288	EXOSC5 EXOSC3 EXOSC9 ZFP36
3.50476e-05	4	32	46.6667	Androgen receptor signaling pathway	http://amigo.geneontology.org/amigo/term/GO:0030521	EP300 HDAC1 NCOR2 AR
3.99546e-05	7	218	11.9878	Regulation of cell growth	http://amigo.geneontology.org/amigo/term/GO:0001558	SIN3A EXOSC2 EXOSC4 EXOSC9 BCL6 RBBP7 CDHR2
3.99546e-05	6	138	16.2319	Alcoholism	http://www.genome.jp/kegg-bin/show_pathway?ssc05034	HDAC1 HDAC3 HDAC5 HDAC4 HDAC7 TH
3.99546e-05	17	1743	3.64123	Response to organic substance	http://amigo.geneontology.org/amigo/term/GO:0010033	PPARA EP300 SIN3A HDAC1 ACTB NCOR2 INA SYP AR RELA RARA KAT2B HDAC4 ESR1 ZFP36 THRB TH
3.99546e-05	5	76	24.5614	Regulation of gene expression, epigenetic	http://amigo.geneontology.org/amigo/term/GO:0040029	EP300 EXOSC10 HDAC1 HDAC5 HDAC4
4.70742e-05	12	855	5.23977	Response to endogenous stimulus	http://amigo.geneontology.org/amigo/term/GO:0009719	PPARA EP300 HDAC1 ACTB NCOR2 AR RELA RARA KAT2B ESR1 ZFP36 THRB
4.77165e-05	5	79	23.6287	Intracellular steroid hormone receptor signaling pathway	http://amigo.geneontology.org/amigo/term/GO:0030518	EP300 HDAC1 NCOR2 AR ESR1
5.65161e-05	6	147	15.2381	MRNA catabolic process	http://amigo.geneontology.org/amigo/term/GO:0006402	EXOSC5 EXOSC10 EXOSC3 EXOSC4 EXOSC9 ZFP36
6.60028e-05	17	1813	3.50064	Cellular response to chemical stimulus	http://amigo.geneontology.org/amigo/term/GO:0070887	PPARA EP300 SIN3A HDAC1 NCOA7 ACTB NCOR2 INA SYP AR RELA SLC25A23 RARA KAT2B ESR1 ZFP36 THRB
6.65019e-05	10	587	6.36002	RNA processing	http://amigo.geneontology.org/amigo/term/GO:0006396	EXOSC10 EXOSC3 EXOSC4 CDK5RAP1 EXOSC9 EXOSC8 NCOR2 EXOSC1 KAT2B ESR1
6.67748e-05	5	85	21.9608	Steroid hormone mediated signaling pathway	http://amigo.geneontology.org/amigo/term/GO:0043401	EP300 HDAC1 NCOR2 AR ESR1
7.02026e-05	11	736	5.57971	Positive regulation of gene expression	http://amigo.geneontology.org/amigo/term/GO:0010628	EP300 MBIP EXOSC6 EXOSC3 NCOR2 AR RELA RARA ESR1 ZFP36 YY1
7.6812e-05	14	1247	4.19139	Tissue development	http://amigo.geneontology.org/amigo/term/GO:0009888	PPARA EP300 HDAC1 ACTB ANXA4 AR RELA CDHR2 RARA HDAC4 ESR1 ZFP36 ZBTB16 THRB
8.08261e-05	8	349	8.55778	Regulation of growth	http://amigo.geneontology.org/amigo/term/GO:0040008	SIN3A EXOSC2 EXOSC4 EXOSC9 BCL6 RBBP7 AR CDHR2
8.13184e-05	15	1443	3.8808	Cellular response to organic substance	http://amigo.geneontology.org/amigo/term/GO:0071310	PPARA EP300 SIN3A HDAC1 ACTB NCOR2 INA SYP AR RELA RARA KAT2B ESR1 ZFP36 THRB
8.8585e-05	8	354	8.43691	Negative regulation of intracellular signal transduction	http://amigo.geneontology.org/amigo/term/GO:1902532	PPARA HDAC1 BCL6 RELA HDAC3 ESR1 STMN1 HDAC7
8.9924e-05	5	91	20.5128	Epigenetic regulation of gene expression	https://reactome.org/download/current	EP300 ACTB RBBP7 KAT2B RBBP4
9.41597e-05	4	42	35.5556	Somatic recombination of immunoglobulin gene segments	http://amigo.geneontology.org/amigo/term/GO:0016447	EXOSC6 EXOSC3 BCL6 YY1
9.41597e-05	4	42	35.5556	Pri-miRNA transcription by RNA polymerase II	http://amigo.geneontology.org/amigo/term/GO:0061614	PPARA RELA HDAC4 YY1
9.41597e-05	4	42	35.5556	Regulation of pri-miRNA transcription by RNA polymerase II	http://amigo.geneontology.org/amigo/term/GO:1902893	PPARA RELA HDAC4 YY1
9.78588e-05	14	1279	4.08653	Organic substance catabolic process	http://amigo.geneontology.org/amigo/term/GO:1901575	PPARA EP300 EXOSC5 EXOSC10 DIS3L EXOSC3 EXOSC4 EXOSC9 EXOSC8 DIS3 RELA GFAP HDAC4 ZFP36
9.90822e-05	3	13	86.1538	Cellular response to estrogen stimulus	http://amigo.geneontology.org/amigo/term/GO:0071391	AR RARA ESR1
0.000110427	7	259	10.0901	Cell growth	http://amigo.geneontology.org/amigo/term/GO:0016049	SIN3A EXOSC2 EXOSC4 EXOSC9 BCL6 RBBP7 CDHR2
0.000110427	11	778	5.27849	Epithelium development	http://amigo.geneontology.org/amigo/term/GO:0060429	EP300 HDAC1 ACTB ANXA4 AR RELA CDHR2 RARA ESR1 ZFP36 THRB
0.000124314	10	637	5.86081	DNA-binding transcription factor activity, RNA polymerase II-specific	http://amigo.geneontology.org/amigo/term/GO:0000981	PPARA PPARG BCL6 AR RELA RARA ESR1 ZBTB16 THRB YY1
0.000131236	4	46	32.4638	Somatic diversification of immunoglobulins	http://amigo.geneontology.org/amigo/term/GO:0016445	EXOSC6 EXOSC3 BCL6 YY1
0.000134328	5	100	18.6667	Hydrolase activity, acting on carbon-nitrogen (but not peptide) bonds	http://amigo.geneontology.org/amigo/term/GO:0016810	HDAC1 HDAC3 HDAC5 HDAC4 HDAC7
0.000141444	4	47	31.773	MRNA destabilization	http://amigo.geneontology.org/amigo/term/GO:0061157	EXOSC5 EXOSC3 EXOSC9 ZFP36
0.000148212	8	384	7.77778	Response to lipid	http://amigo.geneontology.org/amigo/term/GO:0033993	EP300 HDAC1 NCOR2 AR RELA RARA ESR1 ZFP36
0.000167512	5	105	17.7778	Hormone-mediated signaling pathway	http://amigo.geneontology.org/amigo/term/GO:0009755	EP300 HDAC1 NCOR2 AR ESR1
0.000174238	4	50	29.8667	DOID:114 heart disease	ftp://ftp.rgd.mcw.edu/pub/data_release	EP300 HDAC1 HDAC3 TH
0.000174238	4	50	29.8667	Somatic cell DNA recombination	http://amigo.geneontology.org/amigo/term/GO:0016444	EXOSC6 EXOSC3 BCL6 YY1
0.000174238	4	50	29.8667	Somatic diversification of immune receptors via germline recombination within a single locus	http://amigo.geneontology.org/amigo/term/GO:0002562	EXOSC6 EXOSC3 BCL6 YY1
0.000174238	4	50	29.8667	RNA destabilization	http://amigo.geneontology.org/amigo/term/GO:0050779	EXOSC5 EXOSC3 EXOSC9 ZFP36
0.000174238	4	50	29.8667	Positive regulation of mRNA catabolic process	http://amigo.geneontology.org/amigo/term/GO:0061014	EXOSC5 EXOSC3 EXOSC9 ZFP36
0.0001836	16	1766	3.38241	Anatomical structure morphogenesis	http://amigo.geneontology.org/amigo/term/GO:0009653	PPARA EP300 SIN3A HDAC1 ACTB BCL6 AR RELA RARA ESR1 STMN1 HDAC7 ZBTB16 THRB YY1 TH
0.000186546	4	51	29.281	DOID:3459 breast carcinoma	ftp://ftp.rgd.mcw.edu/pub/data_release	EP300 HDAC1 ESR1 THRB
0.000191943	5	109	17.1254	DOID:6432 pulmonary hypertension	ftp://ftp.rgd.mcw.edu/pub/data_release	HDAC1 HDAC3 HDAC5 HDAC4 ESR1
0.000228978	8	411	7.26683	Epithelial cell differentiation	http://amigo.geneontology.org/amigo/term/GO:0030855	HDAC1 ANXA4 AR CDHR2 RARA ESR1 ZFP36 THRB
0.000242019	6	196	11.4286	Chromatin organization	http://amigo.geneontology.org/amigo/term/GO:0006325	HDAC1 RELA HDAC5 KAT2B HDAC4 HDAC7
0.000242912	4	55	27.1515	Regulation of ATP metabolic process	http://amigo.geneontology.org/amigo/term/GO:1903578	PPARA EP300 SLC25A23 HDAC4
0.000242912	10	696	5.36398	Animal organ morphogenesis	http://amigo.geneontology.org/amigo/term/GO:0009887	PPARA EP300 HDAC1 AR RELA RARA ESR1 THRB YY1 TH
0.000242912	4	55	27.1515	Somatic diversification of immune receptors	http://amigo.geneontology.org/amigo/term/GO:0002200	EXOSC6 EXOSC3 BCL6 YY1
0.000242912	4	55	27.1515	Regulation of intracellular steroid hormone receptor signaling pathway	http://amigo.geneontology.org/amigo/term/GO:0033143	EP300 HDAC1 NCOR2 AR
0.000253301	13	1215	3.99451	Post-translational protein modification	https://reactome.org/download/current	PPARA EP300 MBD6 SIN3A HDAC1 ACTB RBBP7 RELA RARA KAT2B HDAC4 THRB YY1
0.000257973	11	863	4.75859	Macromolecule catabolic process	http://amigo.geneontology.org/amigo/term/GO:0009057	EXOSC5 EXOSC10 DIS3L EXOSC3 EXOSC4 EXOSC9 EXOSC8 DIS3 RELA GFAP ZFP36
0.000282375	15	1625	3.44615	Regulation of molecular function	http://amigo.geneontology.org/amigo/term/GO:0065009	PPARA EP300 SIN3A HDAC1 ACTB ANXA4 BCL6 AR RELA RARA KAT2B HDAC4 ESR1 STMN1 ZFP36
0.00028887	7	307	8.51249	Cellular response to organic cyclic compound	http://amigo.geneontology.org/amigo/term/GO:0071407	EP300 HDAC1 ACTB NCOR2 AR ESR1 ZFP36
0.000290846	4	58	25.7471	MRNA 3 -UTR binding	http://amigo.geneontology.org/amigo/term/GO:0003730	EXOSC4 EXOSC9 EXOSC8 ZFP36
0.000290846	4	58	25.7471	Notch signaling pathway	http://www.genome.jp/kegg-bin/show_pathway?ssc04330	EP300 HDAC1 NCOR2 KAT2B
0.000291718	13	1235	3.92982	Cell death	http://amigo.geneontology.org/amigo/term/GO:0008219	PPARA EP300 SIN3A HDAC1 NCOA7 BCL6 AR RELA RARA ESR1 ZFP36 ZBTB16 THRB
0.000308118	4	59	25.3107	DOID:9003373 Uterine Cervical Neoplasms	ftp://ftp.rgd.mcw.edu/pub/data_release	EP300 HDAC1 THRB YY1
0.000337779	2	3	248.889	Lysine N-acetyltransferase activity, acting on acetyl phosphate as donor	http://amigo.geneontology.org/amigo/term/GO:0004468	EP300 KAT2B
0.000337779	2	3	248.889	N-terminal peptidyl-lysine acetylation	http://amigo.geneontology.org/amigo/term/GO:0018076	EP300 KAT2B
0.000337779	2	3	248.889	Polyadenylation-dependent RNA catabolic process	http://amigo.geneontology.org/amigo/term/GO:0043633	EXOSC10 EXOSC9
0.000337779	8	439	6.80334	Multicellular organismal reproductive process	http://amigo.geneontology.org/amigo/term/GO:0048609	BCL6 AR RARA ESR1 ZBTB16 THRB YY1 TH
0.000339509	8	440	6.78788	Protein kinase binding	http://amigo.geneontology.org/amigo/term/GO:0019901	ACTB RELA RARA KAT2B HDAC4 ESR1 HDAC7 ZFP36
0.000344071	14	1455	3.59221	Regulation of cellular component organization	http://amigo.geneontology.org/amigo/term/GO:0051128	EP300 SIN3A EXOSC10 EXOSC2 EXOSC4 EXOSC9 BCL6 RBBP7 AR CDHR2 GFAP KAT2B ESR1 STMN1
0.000357627	12	1077	4.1597	Negative regulation of response to stimulus	http://amigo.geneontology.org/amigo/term/GO:0048585	PPARA HDAC1 NCOA7 NCOR2 BCL6 AR RELA HDAC3 ESR1 STMN1 HDAC7 ZFP36
0.000367149	3	21	53.3333	Downregulation of SMAD2/3:SMAD4 transcriptional activity	https://reactome.org/download/current	HDAC1 NCOR2 NCOR1
0.000396915	8	451	6.62232	Multicellular organism reproduction	http://amigo.geneontology.org/amigo/term/GO:0032504	BCL6 AR RARA ESR1 ZBTB16 THRB YY1 TH
0.00041801	3	22	50.9091	DOID:9005436 T-Cell Lymphoma	ftp://ftp.rgd.mcw.edu/pub/data_release	EP300 PPARG BCL6
0.00041801	3	22	50.9091	Regulation of androgen receptor signaling pathway	http://amigo.geneontology.org/amigo/term/GO:0060765	EP300 HDAC1 NCOR2
0.000449242	12	1105	4.0543	Apoptotic process	http://amigo.geneontology.org/amigo/term/GO:0006915	PPARA EP300 SIN3A HDAC1 BCL6 AR RELA RARA ESR1 ZFP36 ZBTB16 THRB
0.000450512	4	66	22.6263	RUNX1 regulates genes involved in megakaryocyte differentiation and platelet function	https://reactome.org/download/current	EP300 SIN3A HDAC1 KAT2B
0.000451455	9	603	5.57214	Regulation of catabolic process	http://amigo.geneontology.org/amigo/term/GO:0009894	PPARA EP300 EXOSC5 EXOSC3 EXOSC9 RELA GFAP HDAC4 ZFP36
0.000504367	14	1512	3.45679	Catabolic process	http://amigo.geneontology.org/amigo/term/GO:0009056	PPARA EP300 EXOSC5 EXOSC10 DIS3L EXOSC3 EXOSC4 EXOSC9 EXOSC8 DIS3 RELA GFAP HDAC4 ZFP36
0.000513339	5	138	13.5266	DOID:9007653 Multiple Abnormalities	ftp://ftp.rgd.mcw.edu/pub/data_release	EP300 HDAC1 EXOSC3 ACTB SYP
0.000526326	4	69	21.6425	Beta-catenin binding	http://amigo.geneontology.org/amigo/term/GO:0008013	EP300 TBL1XR1 AR ESR1
0.000526326	5	139	13.4293	Signaling by Nuclear Receptors	https://reactome.org/download/current	EP300 HDAC1 RARA KAT2B YY1
0.00052645	3	24	46.6667	3 -5 -exoribonuclease activity	http://amigo.geneontology.org/amigo/term/GO:0000175	EXOSC10 DIS3L DIS3
0.000535771	8	474	6.30098	Regulation of cytokine production	http://amigo.geneontology.org/amigo/term/GO:0001817	PPARA ANXA4 BCL6 RELA RARA HDAC7 ZFP36 YY1
0.000557415	7	347	7.53122	DOID:9005643 Diabetes Mellitus Experimental	ftp://ftp.rgd.mcw.edu/pub/data_release	EP300 HDAC1 PPARG AR HDAC4 ESR1 TH
0.000575936	4	71	21.0329	DNA modification	http://amigo.geneontology.org/amigo/term/GO:0006304	EXOSC6 EXOSC5 EXOSC3 EXOSC4
0.00057631	8	480	6.22222	Cytokine production	http://amigo.geneontology.org/amigo/term/GO:0001816	PPARA ANXA4 BCL6 RELA RARA HDAC7 ZFP36 YY1
0.00057631	9	626	5.36741	Negative regulation of molecular function	http://amigo.geneontology.org/amigo/term/GO:0044092	PPARA SIN3A ACTB ANXA4 KAT2B HDAC4 ESR1 STMN1 ZFP36
0.000600151	4	72	20.7407	Positive regulation of mRNA metabolic process	http://amigo.geneontology.org/amigo/term/GO:1903313	EXOSC5 EXOSC3 EXOSC9 ZFP36
0.000600307	5	144	12.963	DOID:9002165 Diabetic Nephropathies	ftp://ftp.rgd.mcw.edu/pub/data_release	EP300 PPARG HDAC5 HDAC4 ESR1
0.000602588	12	1147	3.90584	Programmed cell death	http://amigo.geneontology.org/amigo/term/GO:0012501	PPARA EP300 SIN3A HDAC1 BCL6 AR RELA RARA ESR1 ZFP36 ZBTB16 THRB
0.000619344	8	487	6.13279	Pathways in cancer	http://www.genome.jp/kegg-bin/show_pathway?ssc05200	EP300 HDAC1 PPARG AR RELA RARA ESR1 ZBTB16
0.000619344	4	73	20.4566	PW:0000204 Notch signaling pathway	ftp://ftp.rgd.mcw.edu/pub/data_release	EP300 HDAC1 KAT2B YY1
0.000619344	4	73	20.4566	Immunoglobulin production	http://amigo.geneontology.org/amigo/term/GO:0002377	EXOSC6 EXOSC3 BCL6 YY1
0.000637286	3	26	43.0769	DOID:12217 Lewy body dementia	ftp://ftp.rgd.mcw.edu/pub/data_release	MAP2 GFAP TH
0.000647574	4	74	20.1802	Protein N-terminus binding	http://amigo.geneontology.org/amigo/term/GO:0047485	HDAC1 NCOR2 TBL1XR1 RELA
0.000653133	13	1355	3.5818	Nervous system development	http://amigo.geneontology.org/amigo/term/GO:0007399	EP300 SIN3A HDAC1 INA BCL6 OLIG1 MAP2 GFAP RARA STMN1 ZBTB16 THRB TH
0.000691878	10	807	4.62619	Neuron differentiation	http://amigo.geneontology.org/amigo/term/GO:0030182	EP300 SIN3A HDAC1 BCL6 OLIG1 MAP2 GFAP STMN1 THRB TH
0.000698825	8	497	6.00939	Chromosome organization	http://amigo.geneontology.org/amigo/term/GO:0051276	EXOSC10 HDAC1 RELA HDAC5 KAT2B HDAC4 HDAC7 YY1
0.000699823	3	27	41.4815	Exoribonuclease activity, producing 5 -phosphomonoesters	http://amigo.geneontology.org/amigo/term/GO:0016896	EXOSC10 DIS3L DIS3
0.000726587	10	813	4.59205	DNA-binding transcription factor activity	http://amigo.geneontology.org/amigo/term/GO:0003700	PPARA PPARG BCL6 AR RELA RARA ESR1 ZBTB16 THRB YY1
0.000737259	4	77	19.3939	Estrogen-dependent gene expression	https://reactome.org/download/current	EP300 HDAC1 KAT2B YY1
0.000757552	8	504	5.92593	Kinase binding	http://amigo.geneontology.org/amigo/term/GO:0019900	ACTB RELA RARA KAT2B HDAC4 ESR1 HDAC7 ZFP36
0.000765168	14	1587	3.29343	Regulation of protein metabolic process	http://amigo.geneontology.org/amigo/term/GO:0051246	EP300 SIN3A EXOSC5 HDAC1 NCOA7 EXOSC3 EXOSC9 BCL6 RELA HDAC3 GFAP KAT2B HDAC4 ZFP36
0.000765453	3	28	40	Exoribonuclease activity	http://amigo.geneontology.org/amigo/term/GO:0004532	EXOSC10 DIS3L DIS3
0.000769577	11	997	4.11902	Regulation of cell differentiation	http://amigo.geneontology.org/amigo/term/GO:0045595	PPARA SIN3A HDAC1 BCL6 AR GFAP RARA HDAC4 HDAC7 ZFP36 ZBTB16
0.000787041	14	1593	3.28102	Regulation of developmental process	http://amigo.geneontology.org/amigo/term/GO:0050793	PPARA SIN3A EXOSC6 HDAC1 EXOSC3 BCL6 AR GFAP RARA HDAC4 ESR1 HDAC7 ZFP36 ZBTB16
0.000823971	6	256	8.75	Regulation of binding	http://amigo.geneontology.org/amigo/term/GO:0051098	EP300 SIN3A ACTB RARA HDAC4 STMN1
0.000838765	11	1008	4.07407	Regulation of cell death	http://amigo.geneontology.org/amigo/term/GO:0010941	PPARA SIN3A HDAC1 NCOA7 BCL6 AR RELA RARA ESR1 ZFP36 ZBTB16
0.000856637	10	833	4.48179	Regulation of response to stress	http://amigo.geneontology.org/amigo/term/GO:0080134	PPARA SIN3A MBIP NCOA7 BCL6 RELA SLC25A23 HDAC3 ESR1 ZFP36
0.000865216	4	81	18.4362	Regulation of generation of precursor metabolites and energy	http://amigo.geneontology.org/amigo/term/GO:0043467	PPARA EP300 SLC25A23 HDAC4
0.000873512	5	159	11.74	MicroRNAs in cancer	http://www.genome.jp/kegg-bin/show_pathway?ssc05206	EP300 HDAC1 HDAC5 HDAC4 STMN1
0.000894894	2	5	149.333	Cytoplasmic exosome (RNase complex)	http://amigo.geneontology.org/amigo/term/GO:0000177	DIS3L EXOSC3
0.000894894	2	5	149.333	Transcriptional Regulation by MECP2	https://reactome.org/download/current	SIN3A HDAC1
0.000894894	2	5	149.333	Regulation of MECP2 expression and activity	https://reactome.org/download/current	SIN3A HDAC1
0.000894894	2	5	149.333	DOID:9007181 Osteoporotic Fractures	ftp://ftp.rgd.mcw.edu/pub/data_release	AR ESR1
0.000894894	3	30	37.3333	Negative regulation of cellular carbohydrate metabolic process	http://amigo.geneontology.org/amigo/term/GO:0010677	PPARA EP300 HDAC4
0.000894894	3	30	37.3333	Regulation of isotype switching	http://amigo.geneontology.org/amigo/term/GO:0045191	EXOSC6 EXOSC3 BCL6
0.000894969	11	1020	4.02614	Regulation of intracellular signal transduction	http://amigo.geneontology.org/amigo/term/GO:1902531	PPARA EP300 MBIP HDAC1 BCL6 AR RELA HDAC3 ESR1 STMN1 HDAC7
0.000965293	12	1220	3.67213	Cellular response to stress	http://amigo.geneontology.org/amigo/term/GO:0033554	PPARA EP300 MBIP NCOA7 BCL6 RBBP7 RELA SLC25A23 HDAC3 GFAP ZFP36 YY1
0.00097423	5	164	11.3821	Rhythmic process	http://amigo.geneontology.org/amigo/term/GO:0048511	PPARA EP300 SIN3A HDAC1 ESR1
0.00097423	10	851	4.387	Positive regulation of developmental process	http://amigo.geneontology.org/amigo/term/GO:0051094	SIN3A EXOSC6 HDAC1 EXOSC3 BCL6 AR GFAP RARA ZFP36 ZBTB16
0.000988307	10	853	4.37671	Negative regulation of signal transduction	http://amigo.geneontology.org/amigo/term/GO:0009968	PPARA HDAC1 NCOR2 BCL6 AR RELA HDAC3 ESR1 STMN1 HDAC7
0.000988307	9	685	4.90511	Immune system development	http://amigo.geneontology.org/amigo/term/GO:0002520	EP300 SIN3A EXOSC6 EXOSC3 BCL6 RARA ZFP36 ZBTB16 YY1
0.000994517	7	391	6.68372	Response to organic cyclic compound	http://amigo.geneontology.org/amigo/term/GO:0014070	EP300 HDAC1 ACTB NCOR2 AR ESR1 ZFP36
0.00105468	3	32	35	Regulation of glycolytic process	http://amigo.geneontology.org/amigo/term/GO:0006110	PPARA EP300 HDAC4
0.00106503	6	272	8.23529	Peptidyl-lysine modification	http://amigo.geneontology.org/amigo/term/GO:0018205	EP300 SIN3A MBIP RELA KAT2B HDAC4
0.00106758	4	87	17.1648	Regulation of cellular carbohydrate metabolic process	http://amigo.geneontology.org/amigo/term/GO:0010675	PPARA EP300 KAT2B HDAC4
0.00108643	11	1047	3.92232	Regulation of cell population proliferation	http://amigo.geneontology.org/amigo/term/GO:0042127	HDAC1 BCL6 AR RELA GFAP RARA KAT2B HDAC4 ESR1 ZFP36 ZBTB16
0.00110751	4	88	16.9697	PW:0000718 p53 signaling pathway	ftp://ftp.rgd.mcw.edu/pub/data_release	EP300 HDAC1 KAT2B YY1
0.00113112	3	33	33.9394	DOID:8634 prostate carcinoma in situ	ftp://ftp.rgd.mcw.edu/pub/data_release	HDAC1 AR ESR1
0.00113112	3	33	33.9394	Negative regulation of carbohydrate metabolic process	http://amigo.geneontology.org/amigo/term/GO:0045912	PPARA EP300 HDAC4
0.00115605	8	545	5.48012	Multi-organism reproductive process	http://amigo.geneontology.org/amigo/term/GO:0044703	BCL6 AR RARA ESR1 ZBTB16 THRB YY1 TH
0.00115961	5	172	10.8527	Chemical carcinogenesis	http://www.genome.jp/kegg-bin/show_pathway?ssc05207	PPARA BCL6 AR RELA ESR1
0.00123636	2	6	124.444	Intracellular mRNA localization	http://amigo.geneontology.org/amigo/term/GO:0008298	EXOSC10 ZFP36
0.00123636	2	6	124.444	DOID:9003919 Urination Disorders	ftp://ftp.rgd.mcw.edu/pub/data_release	GFAP ESR1
0.00123636	8	551	5.42045	Positive regulation of cell differentiation	http://amigo.geneontology.org/amigo/term/GO:0045597	SIN3A HDAC1 BCL6 AR GFAP RARA ZFP36 ZBTB16
0.00123636	2	6	124.444	Mammary gland branching involved in pregnancy	http://amigo.geneontology.org/amigo/term/GO:0060745	AR ESR1
0.00127201	4	92	16.2319	DOID:3021 acute kidney failure	ftp://ftp.rgd.mcw.edu/pub/data_release	PPARG AR HDAC3 HDAC5
0.00130635	3	35	32	Regulation of carbohydrate catabolic process	http://amigo.geneontology.org/amigo/term/GO:0043470	PPARA EP300 HDAC4
0.00130635	3	35	32	Regulation of gluconeogenesis	http://amigo.geneontology.org/amigo/term/GO:0006111	PPARA EP300 KAT2B
0.00131025	4	93	16.0573	RRNA processing	http://amigo.geneontology.org/amigo/term/GO:0006364	EXOSC10 EXOSC3 EXOSC4 KAT2B
0.00131025	8	558	5.35245	Multi-organism process	http://amigo.geneontology.org/amigo/term/GO:0051704	BCL6 AR RARA ESR1 ZBTB16 THRB YY1 TH
0.00134721	5	179	10.4283	Positive regulation of DNA-binding transcription factor activity	http://amigo.geneontology.org/amigo/term/GO:0051091	EP300 AR RELA HDAC4 ESR1
0.00135225	4	94	15.8865	Regulation of mRNA stability	http://amigo.geneontology.org/amigo/term/GO:0043488	EXOSC5 EXOSC3 EXOSC9 ZFP36
0.0013555	9	722	4.65374	Cellular macromolecule catabolic process	http://amigo.geneontology.org/amigo/term/GO:0044265	EXOSC5 EXOSC10 DIS3L EXOSC3 EXOSC4 EXOSC9 EXOSC8 DIS3 ZFP36
0.00135784	5	180	10.3704	DNA-binding transcription repressor activity	http://amigo.geneontology.org/amigo/term/GO:0001217	PPARA BCL6 RELA ZBTB16 YY1
0.00135784	5	180	10.3704	DNA-binding transcription repressor activity, RNA polymerase II-specific	http://amigo.geneontology.org/amigo/term/GO:0001227	PPARA BCL6 RELA ZBTB16 YY1
0.00135784	5	180	10.3704	B cell activation	http://amigo.geneontology.org/amigo/term/GO:0042113	EP300 EXOSC6 EXOSC3 BCL6 YY1
0.00137619	3	36	31.1111	Regulation of gene silencing by miRNA	http://amigo.geneontology.org/amigo/term/GO:0060964	NCOR2 ESR1 ZFP36
0.00140841	6	291	7.69759	Regulation of DNA-binding transcription factor activity	http://amigo.geneontology.org/amigo/term/GO:0051090	EP300 ANXA4 AR RELA HDAC4 ESR1
0.00141466	5	182	10.2564	Positive regulation of lymphocyte activation	http://amigo.geneontology.org/amigo/term/GO:0051251	EXOSC6 EXOSC3 BCL6 RARA ZBTB16
0.00142632	10	904	4.12979	Regulation of apoptotic process	http://amigo.geneontology.org/amigo/term/GO:0042981	PPARA SIN3A HDAC1 BCL6 AR RELA RARA ESR1 ZFP36 ZBTB16
0.00145516	10	907	4.11613	Negative regulation of cell communication	http://amigo.geneontology.org/amigo/term/GO:0010648	PPARA HDAC1 NCOR2 BCL6 AR RELA HDAC3 ESR1 STMN1 HDAC7
0.00145516	10	907	4.11613	Generation of neurons	http://amigo.geneontology.org/amigo/term/GO:0048699	EP300 SIN3A HDAC1 BCL6 OLIG1 MAP2 GFAP STMN1 THRB TH
0.00145763	3	37	30.2703	Exonuclease activity, active with either ribo- or deoxyribonucleic acids and producing 5 -phosphomonoesters	http://amigo.geneontology.org/amigo/term/GO:0016796	EXOSC10 DIS3L DIS3
0.00145763	3	37	30.2703	Transcriptional regulation by RUNX3	https://reactome.org/download/current	EP300 KAT2B HDAC4
0.00145763	4	97	15.3952	Gene silencing	http://amigo.geneontology.org/amigo/term/GO:0016458	HDAC1 NCOR2 ESR1 ZFP36
0.00148742	10	911	4.09806	Negative regulation of signaling	http://amigo.geneontology.org/amigo/term/GO:0023057	PPARA HDAC1 NCOR2 BCL6 AR RELA HDAC3 ESR1 STMN1 HDAC7
0.00150607	4	98	15.2381	Negative regulation of translation	http://amigo.geneontology.org/amigo/term/GO:0017148	EXOSC5 EXOSC3 EXOSC9 ZFP36
0.00153387	2	7	106.667	CD209 (DC-SIGN) signaling	https://reactome.org/download/current	EP300 RELA
0.00153387	4	99	15.0842	ESR-mediated signaling	https://reactome.org/download/current	EP300 HDAC1 KAT2B YY1
0.00153387	2	7	106.667	RUNX3 regulates p14-ARF	https://reactome.org/download/current	EP300 HDAC4
0.00153387	2	7	106.667	Regulation of FOXO transcriptional activity by acetylation	https://reactome.org/download/current	EP300 KAT2B
0.00153387	6	298	7.51678	DOID:9970 obesity	ftp://ftp.rgd.mcw.edu/pub/data_release	EP300 PPARG AR HDAC4 ESR1 TH
0.00153387	7	431	6.06342	DOID:9002304 Prostatic Neoplasms	ftp://ftp.rgd.mcw.edu/pub/data_release	HDAC1 NCOA7 TBL1XR1 AR ESR1 STMN1 ZBTB16
0.00153387	8	579	5.15832	Positive regulation of cell population proliferation	http://amigo.geneontology.org/amigo/term/GO:0008284	HDAC1 BCL6 AR RELA GFAP RARA HDAC4 ESR1
0.00153387	3	38	29.4737	Somatic recombination of immunoglobulin genes involved in immune response	http://amigo.geneontology.org/amigo/term/GO:0002204	EXOSC6 EXOSC3 BCL6
0.00153387	3	38	29.4737	Somatic diversification of immunoglobulins involved in immune response	http://amigo.geneontology.org/amigo/term/GO:0002208	EXOSC6 EXOSC3 BCL6
0.00153387	3	38	29.4737	Isotype switching	http://amigo.geneontology.org/amigo/term/GO:0045190	EXOSC6 EXOSC3 BCL6
0.00153387	7	430	6.07752	Negative regulation of cell differentiation	http://amigo.geneontology.org/amigo/term/GO:0045596	PPARA BCL6 RARA HDAC4 HDAC7 ZFP36 ZBTB16
0.00153387	2	7	106.667	Prostate gland growth	http://amigo.geneontology.org/amigo/term/GO:0060736	AR ESR1
0.00160649	3	39	28.7179	Transcriptional activity of SMAD2/SMAD3:SMAD4 heterotrimer	https://reactome.org/download/current	HDAC1 NCOR2 NCOR1
0.00160649	3	39	28.7179	Regulation of posttranscriptional gene silencing	http://amigo.geneontology.org/amigo/term/GO:0060147	NCOR2 ESR1 ZFP36
0.00160649	5	190	9.82456	Regulation of small molecule metabolic process	http://amigo.geneontology.org/amigo/term/GO:0062012	PPARA EP300 NCOR2 KAT2B HDAC4
0.00166301	4	102	14.6405	Regulation of TP53 Activity	https://reactome.org/download/current	EP300 HDAC1 RBBP7 RBBP4
0.00166301	6	305	7.34426	Posttranscriptional regulation of gene expression	http://amigo.geneontology.org/amigo/term/GO:0010608	EXOSC5 EXOSC3 EXOSC9 NCOR2 ESR1 ZFP36
0.00167969	10	932	4.00572	Regulation of programmed cell death	http://amigo.geneontology.org/amigo/term/GO:0043067	PPARA SIN3A HDAC1 BCL6 AR RELA RARA ESR1 ZFP36 ZBTB16
0.00168974	3	40	28	3 -5 exonuclease activity	http://amigo.geneontology.org/amigo/term/GO:0008408	EXOSC10 DIS3L DIS3
0.00168974	4	103	14.4984	PW:0000017 Huntington's disease pathway	ftp://ftp.rgd.mcw.edu/pub/data_release	EP300 SIN3A HDAC1 PPARG
0.00168974	3	40	28	Viral transcription	http://amigo.geneontology.org/amigo/term/GO:0019083	EP300 HDAC1 ZFP36
0.00168974	3	40	28	Regulation of gene silencing by RNA	http://amigo.geneontology.org/amigo/term/GO:0060966	NCOR2 ESR1 ZFP36
0.00168974	4	103	14.4984	Regulation of mRNA catabolic process	http://amigo.geneontology.org/amigo/term/GO:0061013	EXOSC5 EXOSC3 EXOSC9 ZFP36
0.00172676	8	593	5.03654	Negative regulation of cellular protein metabolic process	http://amigo.geneontology.org/amigo/term/GO:0032269	SIN3A EXOSC5 NCOA7 EXOSC3 EXOSC9 RELA KAT2B ZFP36
0.0017426	4	104	14.359	Regulation of RNA stability	http://amigo.geneontology.org/amigo/term/GO:0043487	EXOSC5 EXOSC3 EXOSC9 ZFP36
0.00180115	3	41	27.3171	Structural constituent of cytoskeleton	http://amigo.geneontology.org/amigo/term/GO:0005200	ACTB INA GFAP
0.00188112	2	8	93.3333	Sin3 complex	http://amigo.geneontology.org/amigo/term/GO:0016580	SIN3A HDAC1
0.00188112	2	8	93.3333	Sin3-type complex	http://amigo.geneontology.org/amigo/term/GO:0070822	SIN3A HDAC1
0.00188112	2	8	93.3333	Structural constituent of postsynapse	http://amigo.geneontology.org/amigo/term/GO:0099186	ACTB INA
0.00188112	3	42	26.6667	Regulation of PTEN gene transcription	https://reactome.org/download/current	HDAC1 RBBP7 RBBP4
0.00188112	2	8	93.3333	DOID:0110721 neuronal ceroid lipofuscinosis 1	ftp://ftp.rgd.mcw.edu/pub/data_release	SYP GFAP
0.00188112	3	42	26.6667	Immunoglobulin production involved in immunoglobulin-mediated immune response	http://amigo.geneontology.org/amigo/term/GO:0002381	EXOSC6 EXOSC3 BCL6
0.00188112	2	8	93.3333	Regulation of T-helper 2 cell differentiation	http://amigo.geneontology.org/amigo/term/GO:0045628	BCL6 RARA
0.00188112	3	42	26.6667	Regulation of B cell mediated immunity	http://amigo.geneontology.org/amigo/term/GO:0002712	EXOSC6 EXOSC3 BCL6
0.00188112	3	42	26.6667	Regulation of immunoglobulin mediated immune response	http://amigo.geneontology.org/amigo/term/GO:0002889	EXOSC6 EXOSC3 BCL6
0.00188112	2	8	93.3333	Histone H4 deacetylation	http://amigo.geneontology.org/amigo/term/GO:0070933	HDAC1 HDAC4
0.00188112	2	8	93.3333	Histone mRNA catabolic process	http://amigo.geneontology.org/amigo/term/GO:0071044	EXOSC10 EXOSC4
0.00193433	4	108	13.8272	Regulation of carbohydrate metabolic process	http://amigo.geneontology.org/amigo/term/GO:0006109	PPARA EP300 KAT2B HDAC4
0.00199443	3	43	26.0465	Regulation of alpha-beta T cell differentiation	http://amigo.geneontology.org/amigo/term/GO:0046637	BCL6 RARA ZBTB16
0.00209522	5	205	9.10569	Positive regulation of leukocyte activation	http://amigo.geneontology.org/amigo/term/GO:0002696	EXOSC6 EXOSC3 BCL6 RARA ZBTB16
0.00209522	5	205	9.10569	Regulation of leukocyte cell-cell adhesion	http://amigo.geneontology.org/amigo/term/GO:1903037	PPARA BCL6 RELA RARA ZBTB16
0.00211683	3	44	25.4545	RNA Polymerase I Transcription Initiation	https://reactome.org/download/current	HDAC1 RBBP7 RBBP4
0.00222632	8	621	4.80945	Negative regulation of cell death	http://amigo.geneontology.org/amigo/term/GO:0060548	PPARA SIN3A HDAC1 NCOA7 BCL6 AR RELA RARA
0.00225005	3	45	24.8889	DOID:9000784 Fibrosis	ftp://ftp.rgd.mcw.edu/pub/data_release	PPARG HDAC3 HDAC4
0.00225255	4	113	13.2153	Negative regulation of cellular amide metabolic process	http://amigo.geneontology.org/amigo/term/GO:0034249	EXOSC5 EXOSC3 EXOSC9 ZFP36
0.00225687	5	209	8.93142	Positive regulation of cell activation	http://amigo.geneontology.org/amigo/term/GO:0050867	EXOSC6 EXOSC3 BCL6 RARA ZBTB16
0.00230281	7	469	5.57214	Lymphocyte activation	http://amigo.geneontology.org/amigo/term/GO:0046649	EP300 EXOSC6 EXOSC3 BCL6 RARA ZBTB16 YY1
0.00232128	2	9	82.963	NuRD complex	http://amigo.geneontology.org/amigo/term/GO:0016581	HDAC1 RBBP7
0.00232128	2	9	82.963	CHD-type complex	http://amigo.geneontology.org/amigo/term/GO:0090545	HDAC1 RBBP7
0.00232128	2	9	82.963	Positive regulation of gluconeogenesis	http://amigo.geneontology.org/amigo/term/GO:0045722	PPARA KAT2B
0.00241984	9	803	4.18431	Biological process involved in interspecies interaction between organisms	http://amigo.geneontology.org/amigo/term/GO:0044419	EP300 SIN3A EXOSC5 HDAC1 EXOSC4 RELA RARA STMN1 ZFP36
0.00241984	5	213	8.76369	Regulation of inflammatory response	http://amigo.geneontology.org/amigo/term/GO:0050727	PPARA BCL6 RELA ESR1 ZFP36
0.00242437	13	1609	3.01637	Metabolism of proteins	https://reactome.org/download/current	PPARA EP300 MBD6 SIN3A HDAC1 ACTB RBBP7 RELA RARA KAT2B HDAC4 THRB YY1
0.00242437	4	116	12.8736	Histone acetylation	http://amigo.geneontology.org/amigo/term/GO:0016573	EP300 SIN3A MBIP KAT2B
0.00245102	5	214	8.72274	NcRNA processing	http://amigo.geneontology.org/amigo/term/GO:0034470	EXOSC10 EXOSC3 EXOSC4 CDK5RAP1 KAT2B
0.0024718	3	47	23.8298	Gluconeogenesis	http://amigo.geneontology.org/amigo/term/GO:0006094	PPARA EP300 KAT2B
0.00247756	7	477	5.47869	Sexual reproduction	http://amigo.geneontology.org/amigo/term/GO:0019953	BCL6 AR RARA ZBTB16 THRB YY1 TH
0.00249434	10	994	3.75587	Neurogenesis	http://amigo.geneontology.org/amigo/term/GO:0022008	EP300 SIN3A HDAC1 BCL6 OLIG1 MAP2 GFAP STMN1 THRB TH
0.00249434	8	636	4.69602	Negative regulation of protein metabolic process	http://amigo.geneontology.org/amigo/term/GO:0051248	SIN3A EXOSC5 NCOA7 EXOSC3 EXOSC9 RELA KAT2B ZFP36
0.00253592	4	118	12.6554	Internal protein amino acid acetylation	http://amigo.geneontology.org/amigo/term/GO:0006475	EP300 SIN3A MBIP KAT2B
0.00253592	4	118	12.6554	Internal peptidyl-lysine acetylation	http://amigo.geneontology.org/amigo/term/GO:0018393	EP300 SIN3A MBIP KAT2B
0.00257204	8	640	4.66667	Zinc ion binding	http://amigo.geneontology.org/amigo/term/GO:0008270	PPARA EP300 PPARG AR RARA HDAC4 ESR1 THRB
0.00257204	8	640	4.66667	Cellular response to oxygen-containing compound	http://amigo.geneontology.org/amigo/term/GO:1901701	SIN3A ACTB AR RELA RARA KAT2B ESR1 ZFP36
0.0027245	9	820	4.09756	Response to oxygen-containing compound	http://amigo.geneontology.org/amigo/term/GO:1901700	SIN3A ACTB AR RELA RARA KAT2B ESR1 ZFP36 TH
0.00272636	3	49	22.8571	Hexose biosynthetic process	http://amigo.geneontology.org/amigo/term/GO:0019319	PPARA EP300 KAT2B
0.0027575	2	10	74.6667	Negative regulation of production of miRNAs involved in gene silencing by miRNA	http://amigo.geneontology.org/amigo/term/GO:1903799	NCOR2 ESR1
0.0027575	2	10	74.6667	T-helper 2 cell differentiation	http://amigo.geneontology.org/amigo/term/GO:0045064	BCL6 RARA
0.00284636	3	50	22.4	Signaling by TGF-beta Receptor Complex	https://reactome.org/download/current	HDAC1 NCOR2 NCOR1
0.00284636	13	1644	2.95215	Immune system process	http://amigo.geneontology.org/amigo/term/GO:0002376	EP300 SIN3A EXOSC6 EXOSC5 EXOSC3 EXOSC4 BCL6 RELA RARA ESR1 ZFP36 ZBTB16 YY1
0.00284636	3	50	22.4	Histone H3 acetylation	http://amigo.geneontology.org/amigo/term/GO:0043966	SIN3A MBIP KAT2B
0.00284636	3	50	22.4	Regulation of purine nucleotide metabolic process	http://amigo.geneontology.org/amigo/term/GO:1900542	PPARA EP300 HDAC4
0.00287952	4	123	12.1409	Peptidyl-lysine acetylation	http://amigo.geneontology.org/amigo/term/GO:0018394	EP300 SIN3A MBIP KAT2B
0.00300176	3	51	21.9608	Regulation of nucleotide metabolic process	http://amigo.geneontology.org/amigo/term/GO:0006140	PPARA EP300 HDAC4
0.00304474	4	125	11.9467	DOID:224 transient cerebral ischemia	ftp://ftp.rgd.mcw.edu/pub/data_release	EP300 SIN3A PPARG ESR1
0.0030988	5	228	8.18713	Camera-type eye development	http://amigo.geneontology.org/amigo/term/GO:0043010	HDAC1 RARA THRB YY1 TH
0.00322454	9	845	3.97633	Defense response	http://amigo.geneontology.org/amigo/term/GO:0006952	PPARA EP300 SIN3A EXOSC5 EXOSC4 BCL6 RELA ESR1 ZFP36
0.00322454	2	11	67.8788	RUNX3 regulates NOTCH signaling	https://reactome.org/download/current	EP300 KAT2B
0.00322454	2	11	67.8788	Mating behavior	http://amigo.geneontology.org/amigo/term/GO:0007617	THRB TH
0.00322454	2	11	67.8788	PW:0000564 androgen signaling pathway	ftp://ftp.rgd.mcw.edu/pub/data_release	EP300 AR
0.00322454	13	1671	2.90445	Intracellular signal transduction	http://amigo.geneontology.org/amigo/term/GO:0035556	PPARA EP300 MBIP HDAC1 BCL6 AR RELA HDAC3 HDAC4 ESR1 STMN1 HDAC7 ZFP36
0.00322454	2	11	67.8788	Negative regulation of glycolytic process	http://amigo.geneontology.org/amigo/term/GO:0045820	PPARA HDAC4
0.00322454	2	11	67.8788	Maturation of 5.8S rRNA	http://amigo.geneontology.org/amigo/term/GO:0000460	EXOSC10 EXOSC4
0.00322454	2	11	67.8788	Histone H3 deacetylation	http://amigo.geneontology.org/amigo/term/GO:0070932	HDAC1 HDAC4
0.00324164	3	53	21.1321	PW:0000958 forkhead class A signaling pathway	ftp://ftp.rgd.mcw.edu/pub/data_release	EP300 AR ESR1
0.00324164	3	53	21.1321	Viral gene expression	http://amigo.geneontology.org/amigo/term/GO:0019080	EP300 HDAC1 ZFP36
0.00324164	6	359	6.23955	Regulation of defense response	http://amigo.geneontology.org/amigo/term/GO:0031347	PPARA SIN3A BCL6 RELA ESR1 ZFP36
0.00324164	3	53	21.1321	Negative regulation of myeloid cell differentiation	http://amigo.geneontology.org/amigo/term/GO:0045638	RARA ZFP36 ZBTB16
0.00328606	5	233	8.01144	Leukocyte cell-cell adhesion	http://amigo.geneontology.org/amigo/term/GO:0007159	PPARA BCL6 RELA RARA ZBTB16
0.00328606	4	129	11.5762	Circadian rhythm	http://amigo.geneontology.org/amigo/term/GO:0007623	PPARA EP300 SIN3A HDAC1
0.00328606	4	129	11.5762	Lymphocyte activation involved in immune response	http://amigo.geneontology.org/amigo/term/GO:0002285	EXOSC6 EXOSC3 BCL6 RARA
0.00337449	4	130	11.4872	DOID:9008731 Craniofacial Abnormalities	ftp://ftp.rgd.mcw.edu/pub/data_release	EP300 SIN3A ACTB THRB
0.0033768	3	54	20.7407	Monosaccharide biosynthetic process	http://amigo.geneontology.org/amigo/term/GO:0046364	PPARA EP300 KAT2B
0.00351843	3	55	20.3636	SWI/SNF superfamily-type complex	http://amigo.geneontology.org/amigo/term/GO:0070603	HDAC1 RBBP7 YY1
0.00351843	3	55	20.3636	Steroid binding	http://amigo.geneontology.org/amigo/term/GO:0005496	SYP AR ESR1
0.00351843	11	1255	3.27224	Cell population proliferation	http://amigo.geneontology.org/amigo/term/GO:0008283	HDAC1 BCL6 AR RELA GFAP RARA KAT2B HDAC4 ESR1 ZFP36 ZBTB16
0.00351843	3	55	20.3636	Regulation of immunoglobulin production	http://amigo.geneontology.org/amigo/term/GO:0002637	EXOSC6 EXOSC3 BCL6
0.00351843	3	55	20.3636	Regulation of gene silencing	http://amigo.geneontology.org/amigo/term/GO:0060968	NCOR2 ESR1 ZFP36
0.00356455	12	1472	3.04348	Regulation of cellular protein metabolic process	http://amigo.geneontology.org/amigo/term/GO:0032268	EP300 SIN3A EXOSC5 NCOA7 EXOSC3 EXOSC9 BCL6 RELA HDAC3 KAT2B HDAC4 ZFP36
0.00365876	3	56	20	ATPase complex	http://amigo.geneontology.org/amigo/term/GO:1904949	HDAC1 RBBP7 YY1
0.00365876	4	134	11.1443	Transcriptional regulation by RUNX1	https://reactome.org/download/current	EP300 SIN3A HDAC1 KAT2B
0.00365876	4	134	11.1443	DOID:9002211 Hyperalgesia	ftp://ftp.rgd.mcw.edu/pub/data_release	EP300 SIN3A GFAP ESR1
0.00365876	2	12	62.2222	Histone mRNA metabolic process	http://amigo.geneontology.org/amigo/term/GO:0008334	EXOSC10 EXOSC4
0.00365876	2	12	62.2222	PW:0001409 CHD family mediated chromatin remodeling pathway	ftp://ftp.rgd.mcw.edu/pub/data_release	HDAC1 RBBP7
0.00365876	2	12	62.2222	Negative regulation of gene silencing by miRNA	http://amigo.geneontology.org/amigo/term/GO:0060965	NCOR2 ESR1
0.00367398	13	1704	2.8482	Regulation of localization	http://amigo.geneontology.org/amigo/term/GO:0032879	PPARA SIN3A EXOSC10 ACTB BCL6 SYP AR SLC25A23 HDAC3 GFAP STMN1 HDAC7 ZFP36
0.00373758	5	242	7.7135	Deubiquitination	https://reactome.org/download/current	EP300 MBD6 ACTB KAT2B YY1
0.00373758	4	135	11.0617	DOID:289 endometriosis	ftp://ftp.rgd.mcw.edu/pub/data_release	HDAC1 AR HDAC3 ESR1
0.0038004	3	57	19.6491	DOID:2921 glomerulonephritis	ftp://ftp.rgd.mcw.edu/pub/data_release	EP300 PPARG ESR1
0.003942	9	877	3.83124	Transition metal ion binding	http://amigo.geneontology.org/amigo/term/GO:0046914	PPARA EP300 PPARG AR RARA HDAC4 ESR1 THRB TH
0.00397995	3	58	19.3103	Gene silencing by miRNA	http://amigo.geneontology.org/amigo/term/GO:0035195	NCOR2 ESR1 ZFP36
0.00398614	7	529	4.94014	Metabolism of lipids	https://reactome.org/download/current	PPARA SIN3A NCOR2 TBL1XR1 HDAC3 NCOR1 TBL1X
0.0040065	4	138	10.8213	Production of molecular mediator of immune response	http://amigo.geneontology.org/amigo/term/GO:0002440	EXOSC6 EXOSC3 BCL6 YY1
0.00410182	7	532	4.91228	Regulation of immune response	http://amigo.geneontology.org/amigo/term/GO:0050776	SIN3A EXOSC6 EXOSC3 BCL6 RELA RARA ESR1
0.00412291	3	59	18.9831	Schaffer collateral - CA1 synapse	http://amigo.geneontology.org/amigo/term/GO:0098685	ACTB INA SYP
0.00412291	3	59	18.9831	DOID:9005930 Endotoxemia	ftp://ftp.rgd.mcw.edu/pub/data_release	EP300 PPARG MAP2
0.00412291	3	59	18.9831	DOID:9002231 Fetal Growth Retardation	ftp://ftp.rgd.mcw.edu/pub/data_release	SIN3A HDAC1 PPARG
0.00413583	2	13	57.4359	N-terminal protein amino acid acetylation	http://amigo.geneontology.org/amigo/term/GO:0006474	EP300 KAT2B
0.00413583	2	13	57.4359	Structural constituent of synapse	http://amigo.geneontology.org/amigo/term/GO:0098918	ACTB INA
0.00413583	7	534	4.89388	Positive regulation of immune system process	http://amigo.geneontology.org/amigo/term/GO:0002684	SIN3A EXOSC6 EXOSC3 BCL6 RELA RARA ZBTB16
0.00413583	2	13	57.4359	Negative regulation of androgen receptor signaling pathway	http://amigo.geneontology.org/amigo/term/GO:0060766	HDAC1 NCOR2
0.00413643	4	140	10.6667	Nuclear chromosome	http://amigo.geneontology.org/amigo/term/GO:0000228	SIN3A HDAC1 EXOSC9 YY1
0.00423706	3	60	18.6667	Post-transcriptional gene silencing by RNA	http://amigo.geneontology.org/amigo/term/GO:0035194	NCOR2 ESR1 ZFP36
0.00423706	3	60	18.6667	Regulation of carbohydrate biosynthetic process	http://amigo.geneontology.org/amigo/term/GO:0043255	PPARA EP300 KAT2B
0.00423706	3	60	18.6667	Glycolytic process	http://amigo.geneontology.org/amigo/term/GO:0006096	PPARA EP300 HDAC4
0.00423706	4	141	10.591	Positive regulation of leukocyte cell-cell adhesion	http://amigo.geneontology.org/amigo/term/GO:1903039	BCL6 RELA RARA ZBTB16
0.00440501	3	61	18.3607	Exonuclease activity	http://amigo.geneontology.org/amigo/term/GO:0004527	EXOSC10 DIS3L DIS3
0.00440501	3	61	18.3607	ATP generation from ADP	http://amigo.geneontology.org/amigo/term/GO:0006757	PPARA EP300 HDAC4
0.00440501	3	61	18.3607	PKMTs methylate histone lysines	https://reactome.org/download/current	RBBP7 RELA RBBP4
0.00440501	3	61	18.3607	Negative regulation of small molecule metabolic process	http://amigo.geneontology.org/amigo/term/GO:0062014	PPARA EP300 HDAC4
0.00459813	3	62	18.0645	Posttranscriptional gene silencing	http://amigo.geneontology.org/amigo/term/GO:0016441	NCOR2 ESR1 ZFP36
0.00459813	3	62	18.0645	Positive regulation of T cell differentiation	http://amigo.geneontology.org/amigo/term/GO:0045582	BCL6 RARA ZBTB16
0.00461649	5	257	7.26329	Eye development	http://amigo.geneontology.org/amigo/term/GO:0001654	HDAC1 RARA THRB YY1 TH
0.00463464	2	14	53.3333	RNA polymerase II general transcription initiation factor binding	http://amigo.geneontology.org/amigo/term/GO:0001091	AR ESR1
0.00463464	2	14	53.3333	PW:0000569 cortisol signaling pathway	ftp://ftp.rgd.mcw.edu/pub/data_release	EP300 KAT2B
0.00463464	2	14	53.3333	Negative regulation of posttranscriptional gene silencing	http://amigo.geneontology.org/amigo/term/GO:0060149	NCOR2 ESR1
0.00463464	2	14	53.3333	Negative regulation of gene silencing by RNA	http://amigo.geneontology.org/amigo/term/GO:0060967	NCOR2 ESR1
0.00466051	4	146	10.2283	Protein acetylation	http://amigo.geneontology.org/amigo/term/GO:0006473	EP300 SIN3A MBIP KAT2B
0.0047284	3	63	17.7778	B cell activation involved in immune response	http://amigo.geneontology.org/amigo/term/GO:0002312	EXOSC6 EXOSC3 BCL6
0.0047284	3	63	17.7778	Positive regulation of B cell activation	http://amigo.geneontology.org/amigo/term/GO:0050871	EXOSC6 EXOSC3 BCL6
0.0047737	5	260	7.17949	Visual system development	http://amigo.geneontology.org/amigo/term/GO:0150063	HDAC1 RARA THRB YY1 TH
0.00484573	5	261	7.15198	Regulation of cellular amide metabolic process	http://amigo.geneontology.org/amigo/term/GO:0034248	EXOSC5 EXOSC3 EXOSC9 RELA ZFP36
0.00485967	9	913	3.68018	Regulation of immune system process	http://amigo.geneontology.org/amigo/term/GO:0002682	SIN3A EXOSC6 EXOSC3 BCL6 RELA RARA ESR1 ZFP36 ZBTB16
0.00489411	3	64	17.5	Histone acetyltransferase complex	http://amigo.geneontology.org/amigo/term/GO:0000123	EP300 ACTB KAT2B
0.00489411	3	64	17.5	ADP metabolic process	http://amigo.geneontology.org/amigo/term/GO:0046031	PPARA EP300 HDAC4
0.00496893	5	263	7.09759	Lymphocyte differentiation	http://amigo.geneontology.org/amigo/term/GO:0030098	EP300 BCL6 RARA ZBTB16 YY1
0.00503854	4	150	9.95556	DOID:11054 urinary bladder cancer	ftp://ftp.rgd.mcw.edu/pub/data_release	EP300 PPARG HDAC4 ESR1
0.00503854	5	264	7.07071	Sensory system development	http://amigo.geneontology.org/amigo/term/GO:0048880	HDAC1 RARA THRB YY1 TH
0.00505459	7	559	4.67501	Negative regulation of apoptotic process	http://amigo.geneontology.org/amigo/term/GO:0043066	PPARA SIN3A HDAC1 BCL6 AR RELA RARA
0.00506248	3	65	17.2308	Acute myeloid leukemia	http://www.genome.jp/kegg-bin/show_pathway?ssc05221	RELA RARA ZBTB16
0.00507303	7	560	4.66667	Leukocyte activation	http://amigo.geneontology.org/amigo/term/GO:0045321	EP300 EXOSC6 EXOSC3 BCL6 RARA ZBTB16 YY1
0.00507303	9	921	3.64821	Positive regulation of multicellular organismal process	http://amigo.geneontology.org/amigo/term/GO:0051240	EXOSC6 HDAC1 EXOSC3 BCL6 AR RELA GFAP RARA ZBTB16
0.00512057	2	15	49.7778	14-3-3 protein binding	http://amigo.geneontology.org/amigo/term/GO:0071889	HDAC7 ZFP36
0.00512057	2	15	49.7778	Reproductive behavior	http://amigo.geneontology.org/amigo/term/GO:0019098	THRB TH
0.00512057	2	15	49.7778	Negative regulation of purine nucleotide metabolic process	http://amigo.geneontology.org/amigo/term/GO:1900543	PPARA HDAC4
0.00513841	8	736	4.05797	Response to biotic stimulus	http://amigo.geneontology.org/amigo/term/GO:0009607	SIN3A EXOSC5 EXOSC4 RELA CDHR2 RARA STMN1 ZFP36
0.00518695	4	152	9.82456	DOID:9000039 Spinal Cord Injuries	ftp://ftp.rgd.mcw.edu/pub/data_release	MAP2 GFAP RARA ESR1
0.00519813	3	66	16.9697	Gene silencing by RNA	http://amigo.geneontology.org/amigo/term/GO:0031047	NCOR2 ESR1 ZFP36
0.00541929	3	67	16.7164	PTEN Regulation	https://reactome.org/download/current	HDAC1 RBBP7 RBBP4
0.00545567	9	933	3.60129	Cytoskeleton organization	http://amigo.geneontology.org/amigo/term/GO:0007010	ACTB INA BCL6 HDAC3 MAP2 GFAP PFN1 KAT2B STMN1
0.00552989	4	155	9.63441	MRNA binding	http://amigo.geneontology.org/amigo/term/GO:0003729	EXOSC4 EXOSC9 EXOSC8 ZFP36
0.00559581	3	68	16.4706	Purine ribonucleoside diphosphate metabolic process	http://amigo.geneontology.org/amigo/term/GO:0009179	PPARA EP300 HDAC4
0.00559581	3	68	16.4706	Regulation of alpha-beta T cell activation	http://amigo.geneontology.org/amigo/term/GO:0046634	BCL6 RARA ZBTB16
0.00559581	3	68	16.4706	Regulation of NIK/NF-kappaB signaling	http://amigo.geneontology.org/amigo/term/GO:1901222	EP300 RELA HDAC7
0.00562877	5	273	6.83761	Spermatogenesis	http://amigo.geneontology.org/amigo/term/GO:0007283	BCL6 AR RARA ZBTB16 YY1
0.00563749	2	16	46.6667	RNA polymerase II core promoter sequence-specific DNA binding	http://amigo.geneontology.org/amigo/term/GO:0000979	HDAC1 RELA
0.00563749	2	16	46.6667	DOID:986 alopecia areata	ftp://ftp.rgd.mcw.edu/pub/data_release	HDAC1 HDAC7
0.00563749	2	16	46.6667	DOID:9004914 Postmenopausal Osteoporosis	ftp://ftp.rgd.mcw.edu/pub/data_release	AR ESR1
0.00563749	2	16	46.6667	Negative regulation of nucleotide metabolic process	http://amigo.geneontology.org/amigo/term/GO:0045980	PPARA HDAC4
0.00563749	2	16	46.6667	Mammary gland alveolus development	http://amigo.geneontology.org/amigo/term/GO:0060749	AR ESR1
0.00563749	2	16	46.6667	Mammary gland lobule development	http://amigo.geneontology.org/amigo/term/GO:0061377	AR ESR1
0.00566145	4	157	9.51168	Ribosome biogenesis	http://amigo.geneontology.org/amigo/term/GO:0042254	EXOSC10 EXOSC3 EXOSC4 KAT2B
0.00569977	3	69	16.2319	Purine nucleoside diphosphate metabolic process	http://amigo.geneontology.org/amigo/term/GO:0009135	PPARA EP300 HDAC4
0.00569977	3	69	16.2319	Ribonucleoside diphosphate metabolic process	http://amigo.geneontology.org/amigo/term/GO:0009185	PPARA EP300 HDAC4
0.00569977	7	576	4.53704	Negative regulation of programmed cell death	http://amigo.geneontology.org/amigo/term/GO:0043069	PPARA SIN3A HDAC1 BCL6 AR RELA RARA
0.00591804	3	70	16	Signaling by TGF-beta family members	https://reactome.org/download/current	HDAC1 NCOR2 NCOR1
0.00591804	3	70	16	Regulation of glucose metabolic process	http://amigo.geneontology.org/amigo/term/GO:0010906	PPARA EP300 KAT2B
0.00599643	4	160	9.33333	DOID:9005233 Mammary Neoplasms Experimental	ftp://ftp.rgd.mcw.edu/pub/data_release	ACTB AR ESR1 STMN1
0.00601743	5	279	6.69056	Regulation of cell-cell adhesion	http://amigo.geneontology.org/amigo/term/GO:0022407	PPARA BCL6 RELA RARA ZBTB16
0.00612774	3	71	15.7746	Prolactin signaling pathway	http://www.genome.jp/kegg-bin/show_pathway?ssc04917	RELA ESR1 TH
0.00614942	2	17	43.9216	Steroid hormone receptor activity	http://amigo.geneontology.org/amigo/term/GO:0003707	PPARA ESR1
0.00614942	2	17	43.9216	FOXO-mediated transcription	https://reactome.org/download/current	EP300 KAT2B
0.00614942	2	17	43.9216	G0 and Early G1	https://reactome.org/download/current	HDAC1 RBBP4
0.00614942	2	17	43.9216	Mating	http://amigo.geneontology.org/amigo/term/GO:0007618	THRB TH
0.00614942	2	17	43.9216	Negative regulation of interleukin-2 production	http://amigo.geneontology.org/amigo/term/GO:0032703	HDAC7 ZFP36
0.00614942	2	17	43.9216	Negative regulation of Rho protein signal transduction	http://amigo.geneontology.org/amigo/term/GO:0035024	BCL6 STMN1
0.00614942	2	17	43.9216	Negative regulation of NIK/NF-kappaB signaling	http://amigo.geneontology.org/amigo/term/GO:1901223	RELA HDAC7
0.00614942	2	17	43.9216	Positive regulation of transcription from RNA polymerase II promoter involved in cellular response to chemical stimulus	http://amigo.geneontology.org/amigo/term/GO:1901522	EP300 RELA
0.00617906	5	282	6.61939	DOID:9352 type 2 diabetes mellitus	ftp://ftp.rgd.mcw.edu/pub/data_release	EP300 HDAC1 PPARG AR ESR1
0.00626427	5	283	6.596	Myeloid cell differentiation	http://amigo.geneontology.org/amigo/term/GO:0030099	EP300 BCL6 RARA ZFP36 ZBTB16
0.00637797	6	428	5.23364	MRNA metabolic process	http://amigo.geneontology.org/amigo/term/GO:0016071	EXOSC5 EXOSC10 EXOSC3 EXOSC4 EXOSC9 ZFP36
0.00638032	4	164	9.10569	DOID:6000 congestive heart failure	ftp://ftp.rgd.mcw.edu/pub/data_release	EP300 PPARG YY1 TH
0.00639594	3	73	15.3425	Protein acetyltransferase complex	http://amigo.geneontology.org/amigo/term/GO:0031248	EP300 ACTB KAT2B
0.00639594	3	73	15.3425	Acetyltransferase complex	http://amigo.geneontology.org/amigo/term/GO:1902493	EP300 ACTB KAT2B
0.00639594	3	73	15.3425	Positive epigenetic regulation of rRNA expression	https://reactome.org/download/current	EP300 ACTB KAT2B
0.00639594	3	73	15.3425	B-WICH complex positively regulates rRNA expression	https://reactome.org/download/current	EP300 ACTB KAT2B
0.00639594	3	73	15.3425	DOID:9007715 Endometrial Neoplasms	ftp://ftp.rgd.mcw.edu/pub/data_release	EP300 HDAC1 ESR1
0.00639594	3	73	15.3425	Positive regulation of lymphocyte differentiation	http://amigo.geneontology.org/amigo/term/GO:0045621	BCL6 RARA ZBTB16
0.00644402	5	286	6.52681	DOID:10652 Alzheimer's disease	ftp://ftp.rgd.mcw.edu/pub/data_release	EP300 PPARG SYP MAP2 ESR1
0.00644645	11	1389	2.95656	Identical protein binding	http://amigo.geneontology.org/amigo/term/GO:0042802	MBIP ACTB ANXA4 EXOSC8 BCL6 SYP RELA GFAP HDAC4 ESR1 ZBTB16
0.00651813	5	287	6.50407	Male gamete generation	http://amigo.geneontology.org/amigo/term/GO:0048232	BCL6 AR RARA ZBTB16 YY1
0.00653705	4	166	8.99598	Positive regulation of cell-cell adhesion	http://amigo.geneontology.org/amigo/term/GO:0022409	BCL6 RELA RARA ZBTB16
0.00657211	3	74	15.1351	Immunoglobulin mediated immune response	http://amigo.geneontology.org/amigo/term/GO:0016064	EXOSC6 EXOSC3 BCL6
0.00657211	3	74	15.1351	Pyruvate metabolic process	http://amigo.geneontology.org/amigo/term/GO:0006090	PPARA EP300 HDAC4
0.00657821	6	433	5.17321	Negative regulation of cellular component organization	http://amigo.geneontology.org/amigo/term/GO:0051129	EP300 EXOSC10 AR GFAP KAT2B STMN1
0.00659988	2	18	41.4815	Regulation of production of miRNAs involved in gene silencing by miRNA	http://amigo.geneontology.org/amigo/term/GO:1903798	NCOR2 ESR1
0.00659988	2	18	41.4815	Actinin binding	http://amigo.geneontology.org/amigo/term/GO:0042805	RELA RARA
0.00659988	2	18	41.4815	PW:0001185 calcium/calmodulin dependent kinase 2 signaling pathway	ftp://ftp.rgd.mcw.edu/pub/data_release	HDAC5 HDAC4
0.00659988	2	18	41.4815	Regulation of protein sumoylation	http://amigo.geneontology.org/amigo/term/GO:0033233	RELA HDAC4
0.00659988	4	167	8.94212	Cellular carbohydrate metabolic process	http://amigo.geneontology.org/amigo/term/GO:0044262	PPARA EP300 KAT2B HDAC4
0.00672324	3	75	14.9333	B cell mediated immunity	http://amigo.geneontology.org/amigo/term/GO:0019724	EXOSC6 EXOSC3 BCL6
0.00672324	3	75	14.9333	Regulation of DNA recombination	http://amigo.geneontology.org/amigo/term/GO:0000018	EXOSC6 EXOSC3 BCL6
0.00679214	7	602	4.34109	Negative regulation of developmental process	http://amigo.geneontology.org/amigo/term/GO:0051093	PPARA BCL6 RARA HDAC4 HDAC7 ZFP36 ZBTB16
0.00680904	13	1867	2.59954	Metal ion binding	http://amigo.geneontology.org/amigo/term/GO:0046872	PPARA EP300 ANXA4 PPARG AR SLC25A23 CDHR2 RARA HDAC4 ESR1 ZFP36 THRB TH
0.00683037	7	603	4.33389	DNA metabolic process	http://amigo.geneontology.org/amigo/term/GO:0006259	EXOSC6 EXOSC5 EXOSC10 EXOSC3 EXOSC4 BCL6 YY1
0.00693063	3	76	14.7368	DOID:332 amyotrophic lateral sclerosis	ftp://ftp.rgd.mcw.edu/pub/data_release	GFAP RARA HDAC4
0.00706853	7	607	4.30533	Hemopoiesis	http://amigo.geneontology.org/amigo/term/GO:0030097	EP300 SIN3A BCL6 RARA ZFP36 ZBTB16 YY1
0.00717559	2	19	39.2982	Macrophage derived foam cell differentiation	http://amigo.geneontology.org/amigo/term/GO:0010742	PPARA EP300
0.00717559	5	296	6.30631	Regulation of lymphocyte activation	http://amigo.geneontology.org/amigo/term/GO:0051249	EXOSC6 EXOSC3 BCL6 RARA ZBTB16
0.00717559	2	19	39.2982	Negative regulation of gene silencing	http://amigo.geneontology.org/amigo/term/GO:0060969	NCOR2 ESR1
0.00717559	2	19	39.2982	Regulation of production of small RNA involved in gene silencing by RNA	http://amigo.geneontology.org/amigo/term/GO:0070920	NCOR2 ESR1
0.00717559	2	19	39.2982	Foam cell differentiation	http://amigo.geneontology.org/amigo/term/GO:0090077	PPARA EP300
0.00717559	5	296	6.30631	Mononuclear cell differentiation	http://amigo.geneontology.org/amigo/term/GO:1903131	EP300 BCL6 RARA ZBTB16 YY1
0.00728806	4	173	8.63198	DOID:9004009 Reperfusion Injury	ftp://ftp.rgd.mcw.edu/pub/data_release	EP300 PPARG MAP2 TH
0.00734014	3	78	14.359	Alpha-beta T cell differentiation	http://amigo.geneontology.org/amigo/term/GO:0046632	BCL6 RARA ZBTB16
0.00741571	4	174	8.58238	Skin development	http://amigo.geneontology.org/amigo/term/GO:0043588	HDAC1 RELA STMN1 ZFP36
0.00758577	3	79	14.1772	Nucleoside diphosphate phosphorylation	http://amigo.geneontology.org/amigo/term/GO:0006165	PPARA EP300 HDAC4
0.00770491	4	176	8.48485	Leukocyte activation involved in immune response	http://amigo.geneontology.org/amigo/term/GO:0002366	EXOSC6 EXOSC3 BCL6 RARA
0.00776747	13	1900	2.55439	Regulation of signal transduction	http://amigo.geneontology.org/amigo/term/GO:0009966	PPARA EP300 MBIP HDAC1 NCOR2 TBL1XR1 BCL6 AR RELA HDAC3 ESR1 STMN1 HDAC7
0.00782069	3	80	14	Nucleotide phosphorylation	http://amigo.geneontology.org/amigo/term/GO:0046939	PPARA EP300 HDAC4
0.0078209	9	1003	3.34995	Immune response	http://amigo.geneontology.org/amigo/term/GO:0006955	SIN3A EXOSC6 EXOSC5 EXOSC3 EXOSC4 BCL6 RELA RARA ESR1
0.0078209	2	20	37.3333	DOID:11132 prostatic hypertrophy	ftp://ftp.rgd.mcw.edu/pub/data_release	AR ESR1
0.00805928	3	81	13.8272	Ribonuclease activity	http://amigo.geneontology.org/amigo/term/GO:0004540	EXOSC10 DIS3L DIS3
0.00807413	4	179	8.34264	Epstein-Barr virus infection	http://www.genome.jp/kegg-bin/show_pathway?ssc05169	SIN3A HDAC1 NCOR2 RELA
0.00807413	4	179	8.34264	Cell activation involved in immune response	http://amigo.geneontology.org/amigo/term/GO:0002263	EXOSC6 EXOSC3 BCL6 RARA
0.00807413	4	179	8.34264	Protein acylation	http://amigo.geneontology.org/amigo/term/GO:0043543	EP300 SIN3A MBIP KAT2B
0.00822556	4	180	8.2963	ATP metabolic process	http://amigo.geneontology.org/amigo/term/GO:0046034	PPARA EP300 SLC25A23 HDAC4
0.00826985	3	82	13.6585	NIK/NF-kappaB signaling	http://amigo.geneontology.org/amigo/term/GO:0038061	EP300 RELA HDAC7
0.00836285	4	181	8.25046	Transcription coactivator activity	http://amigo.geneontology.org/amigo/term/GO:0003713	EP300 SIN3A NCOA7 KAT2B
0.00837369	7	630	4.14815	Cell activation	http://amigo.geneontology.org/amigo/term/GO:0001775	EP300 EXOSC6 EXOSC3 BCL6 RARA ZBTB16 YY1
0.00841804	2	21	35.5556	Positive regulation of glucose metabolic process	http://amigo.geneontology.org/amigo/term/GO:0010907	PPARA KAT2B
0.00841804	2	21	35.5556	N-terminal protein amino acid modification	http://amigo.geneontology.org/amigo/term/GO:0031365	EP300 KAT2B
0.00841804	2	21	35.5556	Synaptic vesicle endocytosis	http://amigo.geneontology.org/amigo/term/GO:0048488	ACTB SYP
0.00841804	2	21	35.5556	Branching involved in mammary gland duct morphogenesis	http://amigo.geneontology.org/amigo/term/GO:0060444	AR ESR1
0.00841804	2	21	35.5556	Presynaptic endocytosis	http://amigo.geneontology.org/amigo/term/GO:0140238	ACTB SYP
0.00842159	4	182	8.20513	DNA recombination	http://amigo.geneontology.org/amigo/term/GO:0006310	EXOSC6 EXOSC3 BCL6 YY1
0.00844335	6	462	4.84848	Lipid binding	http://amigo.geneontology.org/amigo/term/GO:0008289	PPARA ANXA4 SYP AR RARA ESR1
0.00848351	5	311	6.00214	Positive regulation of immune response	http://amigo.geneontology.org/amigo/term/GO:0050778	SIN3A EXOSC6 EXOSC3 RELA RARA
0.00853685	7	634	4.12198	Negative regulation of multicellular organismal process	http://amigo.geneontology.org/amigo/term/GO:0051241	PPARA ANXA4 BCL6 RARA HDAC7 ZFP36 YY1
0.0086657	3	84	13.3333	DOID:9007188 Liver Neoplasms	ftp://ftp.rgd.mcw.edu/pub/data_release	EXOSC2 PPARG ESR1
0.00889593	7	639	4.08972	Hematopoietic or lymphoid organ development	http://amigo.geneontology.org/amigo/term/GO:0048534	EP300 SIN3A BCL6 RARA ZFP36 ZBTB16 YY1
0.00893244	3	85	13.1765	Male gonad development	http://amigo.geneontology.org/amigo/term/GO:0008584	AR RARA ESR1
0.00903966	2	22	33.9394	Negative regulation of ATP metabolic process	http://amigo.geneontology.org/amigo/term/GO:1903579	PPARA HDAC4
0.00903966	2	22	33.9394	DOID:9004969 Neoplasm Recurrence Local	ftp://ftp.rgd.mcw.edu/pub/data_release	AR ESR1
0.00903966	2	22	33.9394	DOID:8991 cervix uteri carcinoma in situ	ftp://ftp.rgd.mcw.edu/pub/data_release	HDAC1 THRB
0.00903966	2	22	33.9394	Positive regulation of isotype switching	http://amigo.geneontology.org/amigo/term/GO:0045830	EXOSC6 EXOSC3
0.00903966	2	22	33.9394	Prostate gland epithelium morphogenesis	http://amigo.geneontology.org/amigo/term/GO:0060740	AR ESR1
0.00907997	4	187	7.98574	Epidermis development	http://amigo.geneontology.org/amigo/term/GO:0008544	PPARA HDAC1 RELA ZFP36
0.00907997	4	187	7.98574	Regulation of mRNA metabolic process	http://amigo.geneontology.org/amigo/term/GO:1903311	EXOSC5 EXOSC3 EXOSC9 ZFP36
0.00910246	3	86	13.0233	Development of primary male sexual characteristics	http://amigo.geneontology.org/amigo/term/GO:0046546	AR RARA ESR1
0.00918065	13	1948	2.49144	Cation binding	http://amigo.geneontology.org/amigo/term/GO:0043169	PPARA EP300 ANXA4 PPARG AR SLC25A23 CDHR2 RARA HDAC4 ESR1 ZFP36 THRB TH
0.0093754	3	87	12.8736	Camera-type eye morphogenesis	http://amigo.geneontology.org/amigo/term/GO:0048593	THRB YY1 TH
0.00942426	7	648	4.03292	Neuron development	http://amigo.geneontology.org/amigo/term/GO:0048666	EP300 SIN3A MAP2 GFAP STMN1 THRB TH
0.00961776	3	88	12.7273	PW:0000122 Hedgehog signaling pathway	ftp://ftp.rgd.mcw.edu/pub/data_release	SIN3A HDAC1 RBBP7
0.00961776	3	88	12.7273	B cell differentiation	http://amigo.geneontology.org/amigo/term/GO:0030183	EP300 BCL6 YY1
0.00961776	3	88	12.7273	Positive regulation of cell growth	http://amigo.geneontology.org/amigo/term/GO:0030307	EXOSC2 EXOSC4 EXOSC9
0.00961789	2	23	32.4638	Histone acetyltransferase activity	http://amigo.geneontology.org/amigo/term/GO:0004402	EP300 KAT2B
0.00961789	2	23	32.4638	DDX58/IFIH1-mediated induction of interferon-alpha/beta	https://reactome.org/download/current	EP300 RELA
0.00961789	2	23	32.4638	DOID:11383 cryptorchidism	ftp://ftp.rgd.mcw.edu/pub/data_release	AR ESR1
0.00961789	2	23	32.4638	PW:0000507 estrogen signaling pathway	ftp://ftp.rgd.mcw.edu/pub/data_release	EP300 ESR1
0.00961789	2	23	32.4638	PW:0001340 DNA modification pathway	ftp://ftp.rgd.mcw.edu/pub/data_release	SIN3A PPARG
0.00961789	2	23	32.4638	Prostate gland morphogenesis	http://amigo.geneontology.org/amigo/term/GO:0060512	AR ESR1
0.00969249	8	843	3.5429	Reproductive process	http://amigo.geneontology.org/amigo/term/GO:0022414	BCL6 AR RARA ESR1 ZBTB16 THRB YY1 TH
0.00973021	4	192	7.77778	DOID:3070 malignant glioma	ftp://ftp.rgd.mcw.edu/pub/data_release	PPARG ZFPL1 HDAC3 STMN1
0.00973021	8	844	3.5387	Reproduction	http://amigo.geneontology.org/amigo/term/GO:0000003	BCL6 AR RARA ESR1 ZBTB16 THRB YY1 TH
0.0097577	3	89	12.5843	Organ growth	http://amigo.geneontology.org/amigo/term/GO:0035265	AR RARA ESR1
0.00991537	11	1492	2.75246	Response to external stimulus	http://amigo.geneontology.org/amigo/term/GO:0009605	PPARA EP300 SIN3A EXOSC5 EXOSC4 BCL6 RELA RARA ESR1 STMN1 ZFP36
0.0100216	3	90	12.4444	UCH proteinases	https://reactome.org/download/current	MBD6 ACTB YY1
0.0100216	3	90	12.4444	Carbohydrate catabolic process	http://amigo.geneontology.org/amigo/term/GO:0016052	PPARA EP300 HDAC4
0.0102358	5	329	5.67376	DNA-binding transcription activator activity, RNA polymerase II-specific	http://amigo.geneontology.org/amigo/term/GO:0001228	PPARA AR RELA ESR1 YY1
0.0102358	3	91	12.3077	RNA Polymerase I Promoter Clearance	https://reactome.org/download/current	HDAC1 RBBP7 RBBP4
0.0102358	3	91	12.3077	DOID:9000403 Animal Mammary Neoplasms	ftp://ftp.rgd.mcw.edu/pub/data_release	ACTB ESR1 STMN1
0.0102358	3	91	12.3077	Nucleoside diphosphate metabolic process	http://amigo.geneontology.org/amigo/term/GO:0009132	PPARA EP300 HDAC4
0.0102358	2	24	31.1111	Eye photoreceptor cell development	http://amigo.geneontology.org/amigo/term/GO:0042462	THRB TH
0.0102358	2	24	31.1111	Regulation of T-helper cell differentiation	http://amigo.geneontology.org/amigo/term/GO:0045622	BCL6 RARA
0.0104644	4	197	7.58037	Sensory organ morphogenesis	http://amigo.geneontology.org/amigo/term/GO:0090596	HDAC1 THRB YY1 TH
0.0105232	3	92	12.1739	RNA Polymerase I Transcription	https://reactome.org/download/current	HDAC1 RBBP7 RBBP4
0.0108345	3	93	12.043	RNA localization	http://amigo.geneontology.org/amigo/term/GO:0006403	EXOSC10 ZFP36 YY1
0.0109091	5	335	5.57214	DNA-binding transcription activator activity	http://amigo.geneontology.org/amigo/term/GO:0001216	PPARA AR RELA ESR1 YY1
0.0109722	2	25	29.8667	Peptide-lysine-N-acetyltransferase activity	http://amigo.geneontology.org/amigo/term/GO:0061733	EP300 KAT2B
0.0109722	2	25	29.8667	Transcriptional Regulation by E2F6	https://reactome.org/download/current	RBBP7 RBBP4
0.0109722	2	25	29.8667	Regulation of type 2 immune response	http://amigo.geneontology.org/amigo/term/GO:0002828	BCL6 RARA
0.011394	3	95	11.7895	Prostate cancer	http://www.genome.jp/kegg-bin/show_pathway?ssc05215	EP300 AR RELA
0.011394	3	95	11.7895	Regulation of B cell activation	http://amigo.geneontology.org/amigo/term/GO:0050864	EXOSC6 EXOSC3 BCL6
0.011608	10	1299	2.87401	Cellular catabolic process	http://amigo.geneontology.org/amigo/term/GO:0044248	EXOSC5 EXOSC10 DIS3L EXOSC3 EXOSC4 EXOSC9 EXOSC8 DIS3 GFAP ZFP36
0.0116842	2	26	28.7179	DOID:127 leiomyoma	ftp://ftp.rgd.mcw.edu/pub/data_release	AR ESR1
0.0116842	2	26	28.7179	DOID:9000438 Subarachnoid Hemorrhage	ftp://ftp.rgd.mcw.edu/pub/data_release	PPARG ESR1
0.0116842	2	26	28.7179	DOID:9006102 Right Ventricular Hypertrophy	ftp://ftp.rgd.mcw.edu/pub/data_release	HDAC1 HDAC5
0.0116842	2	26	28.7179	DOID:1875 impotence	ftp://ftp.rgd.mcw.edu/pub/data_release	HDAC3 HDAC4
0.0116842	2	26	28.7179	Synaptic vesicle recycling	http://amigo.geneontology.org/amigo/term/GO:0036465	ACTB SYP
0.0116842	2	26	28.7179	Type 2 immune response	http://amigo.geneontology.org/amigo/term/GO:0042092	BCL6 RARA
0.0119266	3	97	11.5464	DOID:305 carcinoma	ftp://ftp.rgd.mcw.edu/pub/data_release	ACTB ESR1 STMN1
0.0119663	6	505	4.43564	Cell-cell adhesion	http://amigo.geneontology.org/amigo/term/GO:0098609	PPARA BCL6 RELA CDHR2 RARA ZBTB16
0.0121605	10	1310	2.84987	Positive regulation of response to stimulus	http://amigo.geneontology.org/amigo/term/GO:0048584	EP300 SIN3A MBIP EXOSC6 EXOSC3 TBL1XR1 AR RELA HDAC3 RARA
0.0122177	3	98	11.4286	DOID:9007661 Dwarfism	ftp://ftp.rgd.mcw.edu/pub/data_release	EP300 SIN3A ACTB
0.0123154	4	208	7.17949	Negative regulation of catabolic process	http://amigo.geneontology.org/amigo/term/GO:0009895	PPARA RELA HDAC4 ZFP36
0.012426	4	209	7.14514	Human T-cell leukemia virus 1 infection	http://www.genome.jp/kegg-bin/show_pathway?ssc05166	EP300 RELA KAT2B ZFP36
0.012426	2	27	27.6543	DOID:9007456 Female Infertility	ftp://ftp.rgd.mcw.edu/pub/data_release	AR ESR1
0.012426	4	209	7.14514	Response to virus	http://amigo.geneontology.org/amigo/term/GO:0009615	SIN3A EXOSC5 EXOSC4 STMN1
0.012426	2	27	27.6543	Positive regulation of cellular carbohydrate metabolic process	http://amigo.geneontology.org/amigo/term/GO:0010676	PPARA KAT2B
0.012426	2	27	27.6543	Mammary gland duct morphogenesis	http://amigo.geneontology.org/amigo/term/GO:0060603	AR ESR1
0.0124285	3	99	11.3131	DOID:9000918 Disease Progression	ftp://ftp.rgd.mcw.edu/pub/data_release	EXOSC5 ESR1 YY1
0.0125072	5	349	5.34862	Regulation of leukocyte activation	http://amigo.geneontology.org/amigo/term/GO:0002694	EXOSC6 EXOSC3 BCL6 RARA ZBTB16
0.0127037	3	100	11.2	DOID:3525 middle cerebral artery infarction	ftp://ftp.rgd.mcw.edu/pub/data_release	HDAC5 HDAC4 TH
0.0127037	3	100	11.2	DOID:3393 coronary artery disease	ftp://ftp.rgd.mcw.edu/pub/data_release	PPARG AR ESR1
0.0127037	3	100	11.2	PW:0001066 ribosome biogenesis pathway	ftp://ftp.rgd.mcw.edu/pub/data_release	EXOSC5 EXOSC10 DIS3
0.0131837	2	28	26.6667	Peptide N-acetyltransferase activity	http://amigo.geneontology.org/amigo/term/GO:0034212	EP300 KAT2B
0.0133498	3	102	10.9804	DOID:9004575 Neoplasm Invasiveness	ftp://ftp.rgd.mcw.edu/pub/data_release	ACTB ESR1 ZBTB16
0.0133498	3	102	10.9804	Male sex differentiation	http://amigo.geneontology.org/amigo/term/GO:0046661	AR RARA ESR1
0.0133498	3	102	10.9804	Positive regulation of NF-kappaB transcription factor activity	http://amigo.geneontology.org/amigo/term/GO:0051092	EP300 AR RELA
0.0136009	7	704	3.71212	Response to other organism	http://amigo.geneontology.org/amigo/term/GO:0051707	SIN3A EXOSC5 EXOSC4 RELA RARA STMN1 ZFP36
0.0136865	7	705	3.70686	Response to external biotic stimulus	http://amigo.geneontology.org/amigo/term/GO:0043207	SIN3A EXOSC5 EXOSC4 RELA RARA STMN1 ZFP36
0.0138315	4	217	6.88172	Regulation of translation	http://amigo.geneontology.org/amigo/term/GO:0006417	EXOSC5 EXOSC3 EXOSC9 ZFP36
0.0138315	4	217	6.88172	Transcriptional Regulation by TP53	https://reactome.org/download/current	EP300 HDAC1 RBBP7 RBBP4
0.0138315	2	29	25.7471	DOID:8927 learning disability	ftp://ftp.rgd.mcw.edu/pub/data_release	SYP TH
0.0138315	3	104	10.7692	DOID:9007096 Stroke	ftp://ftp.rgd.mcw.edu/pub/data_release	HDAC1 GFAP HDAC4
0.0138315	2	29	25.7471	DOID:543 dystonia	ftp://ftp.rgd.mcw.edu/pub/data_release	ACTB TH
0.0138315	2	29	25.7471	DOID:9002331 Knee Osteoarthritis	ftp://ftp.rgd.mcw.edu/pub/data_release	AR ESR1
0.0138315	2	29	25.7471	PW:0001408 INO80 family mediated chromatin remodeling pathway	ftp://ftp.rgd.mcw.edu/pub/data_release	ACTB YY1
0.0138315	2	29	25.7471	Embryonic camera-type eye development	http://amigo.geneontology.org/amigo/term/GO:0031076	RARA TH
0.0138315	2	29	25.7471	Negative regulation of intracellular steroid hormone receptor signaling pathway	http://amigo.geneontology.org/amigo/term/GO:0033144	HDAC1 NCOR2
0.0138315	3	104	10.7692	Cellular response to lipopolysaccharide	http://amigo.geneontology.org/amigo/term/GO:0071222	RELA RARA ZFP36
0.0143718	8	913	3.27127	Positive regulation of molecular function	http://amigo.geneontology.org/amigo/term/GO:0044093	EP300 HDAC1 AR RELA RARA HDAC4 ESR1 STMN1
0.0145507	3	106	10.566	Regulation of T cell differentiation	http://amigo.geneontology.org/amigo/term/GO:0045580	BCL6 RARA ZBTB16
0.0145643	2	30	24.8889	General transcription initiation factor binding	http://amigo.geneontology.org/amigo/term/GO:0140296	AR ESR1
0.0145643	2	30	24.8889	DOID:12377 spinal muscular atrophy	ftp://ftp.rgd.mcw.edu/pub/data_release	AR HDAC4
0.0145643	2	30	24.8889	DOID:1240 leukemia	ftp://ftp.rgd.mcw.edu/pub/data_release	AR ESR1
0.0145643	2	30	24.8889	DOID:9006182 Carotid Artery Injuries	ftp://ftp.rgd.mcw.edu/pub/data_release	PPARG HDAC4
0.0145643	2	30	24.8889	DOID:0060318 acute promyelocytic leukemia	ftp://ftp.rgd.mcw.edu/pub/data_release	RARA ZBTB16
0.0145643	2	30	24.8889	Regulation of CD4-positive, alpha-beta T cell differentiation	http://amigo.geneontology.org/amigo/term/GO:0043370	BCL6 RARA
0.0147519	3	107	10.4673	Negative regulation of cell growth	http://amigo.geneontology.org/amigo/term/GO:0030308	BCL6 RBBP7 CDHR2
0.0147519	3	107	10.4673	Alpha-beta T cell activation	http://amigo.geneontology.org/amigo/term/GO:0046631	BCL6 RARA ZBTB16
0.0150967	3	108	10.3704	Eye morphogenesis	http://amigo.geneontology.org/amigo/term/GO:0048592	THRB YY1 TH
0.0150967	3	108	10.3704	Cellular response to molecule of bacterial origin	http://amigo.geneontology.org/amigo/term/GO:0071219	RELA RARA ZFP36
0.0153217	2	31	24.086	DOID:1520 colon carcinoma	ftp://ftp.rgd.mcw.edu/pub/data_release	EP300 PPARG
0.0153217	2	31	24.086	Positive regulation of alpha-beta T cell differentiation	http://amigo.geneontology.org/amigo/term/GO:0046638	RARA ZBTB16
0.0153217	2	31	24.086	Positive regulation of B cell mediated immunity	http://amigo.geneontology.org/amigo/term/GO:0002714	EXOSC6 EXOSC3
0.0153217	2	31	24.086	Maternal process involved in female pregnancy	http://amigo.geneontology.org/amigo/term/GO:0060135	AR ESR1
0.0153217	2	31	24.086	Positive regulation of immunoglobulin mediated immune response	http://amigo.geneontology.org/amigo/term/GO:0002891	EXOSC6 EXOSC3
0.0153244	3	109	10.2752	Regulation of heart contraction	http://amigo.geneontology.org/amigo/term/GO:0008016	HDAC4 THRB TH
0.0153244	3	109	10.2752	Response to UV	http://amigo.geneontology.org/amigo/term/GO:0009411	EP300 RELA YY1
0.0154021	5	372	5.01792	DOID:9008939 Breast Neoplasms	ftp://ftp.rgd.mcw.edu/pub/data_release	EP300 AR RARA ESR1 STMN1
0.0154021	4	226	6.60767	Viral process	http://amigo.geneontology.org/amigo/term/GO:0016032	PPARA EP300 HDAC1 ZFP36
0.0154021	5	372	5.01792	Regulation of cell activation	http://amigo.geneontology.org/amigo/term/GO:0050865	EXOSC6 EXOSC3 BCL6 RARA ZBTB16
0.0155788	4	227	6.57856	Regulation of immune effector process	http://amigo.geneontology.org/amigo/term/GO:0002697	EXOSC6 EXOSC3 BCL6 RARA
0.015602	3	110	10.1818	DOID:9744 type 1 diabetes mellitus	ftp://ftp.rgd.mcw.edu/pub/data_release	HDAC1 HDAC3 YY1
0.0158655	5	375	4.97778	Inflammatory response	http://amigo.geneontology.org/amigo/term/GO:0006954	PPARA BCL6 RELA ESR1 ZFP36
0.0159307	3	111	10.0901	Nucleotide Excision Repair	https://reactome.org/download/current	EP300 ACTB YY1
0.0159307	3	111	10.0901	DOID:8398 osteoarthritis	ftp://ftp.rgd.mcw.edu/pub/data_release	ACTB PPARG ESR1
0.0159632	2	32	23.3333	Metalloprotease DUBs	https://reactome.org/download/current	EP300 KAT2B
0.0159632	5	376	4.96454	Gamete generation	http://amigo.geneontology.org/amigo/term/GO:0007276	BCL6 AR RARA ZBTB16 YY1
0.0159632	2	32	23.3333	Eye photoreceptor cell differentiation	http://amigo.geneontology.org/amigo/term/GO:0001754	THRB TH
0.0159632	2	32	23.3333	Prostate gland development	http://amigo.geneontology.org/amigo/term/GO:0030850	AR ESR1
0.0162126	3	112	10	Regulation of adaptive immune response based on somatic recombination of immune receptors built from immunoglobulin superfamily domains	http://amigo.geneontology.org/amigo/term/GO:0002822	EXOSC6 EXOSC3 BCL6
0.0165724	3	113	9.9115	Regulation of lymphocyte mediated immunity	http://amigo.geneontology.org/amigo/term/GO:0002706	EXOSC6 EXOSC3 BCL6
0.0165724	3	113	9.9115	Glucose metabolic process	http://amigo.geneontology.org/amigo/term/GO:0006006	PPARA EP300 KAT2B
0.0167829	2	33	22.6263	Axon terminus	http://amigo.geneontology.org/amigo/term/GO:0043679	ACTB SYP
0.0167829	2	33	22.6263	Core promoter sequence-specific DNA binding	http://amigo.geneontology.org/amigo/term/GO:0001046	HDAC1 RELA
0.0167829	2	33	22.6263	Positive regulation of gliogenesis	http://amigo.geneontology.org/amigo/term/GO:0014015	HDAC1 GFAP
0.0167829	2	33	22.6263	Negative regulation of I-kappaB kinase/NF-kappaB signaling	http://amigo.geneontology.org/amigo/term/GO:0043124	HDAC1 ESR1
0.0172779	3	115	9.73913	Multicellular organism growth	http://amigo.geneontology.org/amigo/term/GO:0035264	EP300 AR RARA
0.0173859	6	557	4.02154	Central nervous system development	http://amigo.geneontology.org/amigo/term/GO:0007417	SIN3A HDAC1 OLIG1 MAP2 GFAP ZBTB16
0.0175868	3	116	9.65517	Positive regulation of hemopoiesis	http://amigo.geneontology.org/amigo/term/GO:1903708	BCL6 RARA ZBTB16
0.0175868	2	34	21.9608	Protein sumoylation	http://amigo.geneontology.org/amigo/term/GO:0016925	RELA HDAC4
0.0175868	4	237	6.30098	Ribonucleoprotein complex biogenesis	http://amigo.geneontology.org/amigo/term/GO:0022613	EXOSC10 EXOSC3 EXOSC4 KAT2B
0.0175868	2	34	21.9608	Photoreceptor cell development	http://amigo.geneontology.org/amigo/term/GO:0042461	THRB TH
0.0175868	2	34	21.9608	Positive regulation of DNA recombination	http://amigo.geneontology.org/amigo/term/GO:0045911	EXOSC6 EXOSC3
0.0175868	3	116	9.65517	Positive regulation of leukocyte differentiation	http://amigo.geneontology.org/amigo/term/GO:1902107	BCL6 RARA ZBTB16
0.017735	5	388	4.811	Leukocyte differentiation	http://amigo.geneontology.org/amigo/term/GO:0002521	EP300 BCL6 RARA ZBTB16 YY1
0.018537	2	35	21.3333	Regulation of transcription regulatory region DNA binding	http://amigo.geneontology.org/amigo/term/GO:2000677	EP300 SIN3A
0.018537	2	35	21.3333	Genitalia development	http://amigo.geneontology.org/amigo/term/GO:0048806	AR ESR1
0.0187042	3	119	9.41176	Regulation of production of molecular mediator of immune response	http://amigo.geneontology.org/amigo/term/GO:0002700	EXOSC6 EXOSC3 BCL6
0.018813	5	394	4.73773	DOID:1059 intellectual disability	ftp://ftp.rgd.mcw.edu/pub/data_release	EP300 SIN3A HDAC4 YY1 TH
0.0190621	3	120	9.33333	Negative regulation of DNA-binding transcription factor activity	http://amigo.geneontology.org/amigo/term/GO:0043433	ANXA4 HDAC4 ESR1
0.0190621	7	762	3.42957	Anatomical structure formation involved in morphogenesis	http://amigo.geneontology.org/amigo/term/GO:0048646	PPARA EP300 HDAC1 BCL6 AR RARA HDAC7
0.0191904	4	244	6.12022	Urogenital system development	http://amigo.geneontology.org/amigo/term/GO:0001655	AR RARA ESR1 ZBTB16
0.0191904	4	244	6.12022	Regulation of DNA metabolic process	http://amigo.geneontology.org/amigo/term/GO:0051052	EXOSC6 EXOSC10 EXOSC3 BCL6
0.0193903	2	36	20.7407	Positive regulation of immunoglobulin production	http://amigo.geneontology.org/amigo/term/GO:0002639	EXOSC6 EXOSC3
0.0193943	3	121	9.2562	Regulation of adaptive immune response	http://amigo.geneontology.org/amigo/term/GO:0002819	EXOSC6 EXOSC3 BCL6
0.0196371	5	399	4.67836	Sensory organ development	http://amigo.geneontology.org/amigo/term/GO:0007423	HDAC1 RARA THRB YY1 TH
0.0197277	6	575	3.89565	Synapse	http://amigo.geneontology.org/amigo/term/GO:0045202	ACTB INA SYP RELA HDAC4 TH
0.0201936	2	37	20.1802	SUMOylation of chromatin organization proteins	https://reactome.org/download/current	HDAC1 HDAC4
0.0201936	2	37	20.1802	SUMOylation of transcription cofactors	https://reactome.org/download/current	EP300 SIN3A
0.0201936	2	37	20.1802	Intracellular estrogen receptor signaling pathway	http://amigo.geneontology.org/amigo/term/GO:0030520	AR ESR1
0.0201936	2	37	20.1802	Production of miRNAs involved in gene silencing by miRNA	http://amigo.geneontology.org/amigo/term/GO:0035196	NCOR2 ESR1
0.0201936	2	37	20.1802	Negative regulation of Ras protein signal transduction	http://amigo.geneontology.org/amigo/term/GO:0046580	BCL6 STMN1
0.0201936	2	37	20.1802	Regulation of protein deacetylation	http://amigo.geneontology.org/amigo/term/GO:0090311	EP300 BCL6
0.0205326	6	581	3.85542	Regulation of response to external stimulus	http://amigo.geneontology.org/amigo/term/GO:0032101	PPARA SIN3A BCL6 RELA ESR1 ZFP36
0.0206739	6	582	3.8488	Developmental process involved in reproduction	http://amigo.geneontology.org/amigo/term/GO:0003006	BCL6 AR RARA ESR1 ZBTB16 YY1
0.020898	3	125	8.96	Carbohydrate biosynthetic process	http://amigo.geneontology.org/amigo/term/GO:0016051	PPARA EP300 KAT2B
0.0209719	2	38	19.6491	Neuromuscular junction	http://amigo.geneontology.org/amigo/term/GO:0031594	SYP HDAC4
0.0209719	2	38	19.6491	DNA Damage Recognition in GG-NER	https://reactome.org/download/current	ACTB YY1
0.0209719	2	38	19.6491	DsRNA processing	http://amigo.geneontology.org/amigo/term/GO:0031050	NCOR2 ESR1
0.0209719	2	38	19.6491	Negative regulation of osteoblast differentiation	http://amigo.geneontology.org/amigo/term/GO:0045668	HDAC4 HDAC7
0.0209719	5	407	4.5864	Developmental growth	http://amigo.geneontology.org/amigo/term/GO:0048589	EP300 SIN3A AR RARA ESR1
0.0209719	2	38	19.6491	Mammary gland morphogenesis	http://amigo.geneontology.org/amigo/term/GO:0060443	AR ESR1
0.0209719	2	38	19.6491	Production of small RNA involved in gene silencing by RNA	http://amigo.geneontology.org/amigo/term/GO:0070918	NCOR2 ESR1
0.0210907	3	126	8.88889	Regulation of lymphocyte differentiation	http://amigo.geneontology.org/amigo/term/GO:0045619	BCL6 RARA ZBTB16
0.0210907	3	126	8.88889	Cellular response to biotic stimulus	http://amigo.geneontology.org/amigo/term/GO:0071216	RELA RARA ZFP36
0.0210909	4	253	5.9025	Catalytic activity, acting on RNA	http://amigo.geneontology.org/amigo/term/GO:0140098	EXOSC10 DIS3L DIS3 KCNMB3
0.0217546	2	39	19.1453	PcG protein complex	http://amigo.geneontology.org/amigo/term/GO:0031519	RBBP7 YY1
0.0217546	2	39	19.1453	Basal transcription machinery binding	http://amigo.geneontology.org/amigo/term/GO:0001098	AR ESR1
0.0217546	2	39	19.1453	Basal RNA polymerase II transcription machinery binding	http://amigo.geneontology.org/amigo/term/GO:0001099	AR ESR1
0.0217546	2	39	19.1453	DOID:3069 astrocytoma	ftp://ftp.rgd.mcw.edu/pub/data_release	AR ESR1
0.0217546	2	39	19.1453	Positive regulation of carbohydrate metabolic process	http://amigo.geneontology.org/amigo/term/GO:0045913	PPARA KAT2B
0.0217546	3	128	8.75	Positive regulation of T cell activation	http://amigo.geneontology.org/amigo/term/GO:0050870	BCL6 RARA ZBTB16
0.0217546	3	128	8.75	Positive regulation of binding	http://amigo.geneontology.org/amigo/term/GO:0051099	EP300 RARA STMN1
0.0217546	2	39	19.1453	Face development	http://amigo.geneontology.org/amigo/term/GO:0060324	EP300 RARA
0.0220042	4	257	5.81064	Regulation of hemopoiesis	http://amigo.geneontology.org/amigo/term/GO:1903706	BCL6 RARA ZFP36 ZBTB16
0.0221676	3	129	8.68217	Heart contraction	http://amigo.geneontology.org/amigo/term/GO:0060047	HDAC4 THRB TH
0.0222436	4	258	5.78811	Blood circulation	http://amigo.geneontology.org/amigo/term/GO:0008015	AR HDAC4 THRB TH
0.0224068	7	793	3.2955	Embryo development	http://amigo.geneontology.org/amigo/term/GO:0009790	EP300 SIN3A HDAC1 AR RARA ZBTB16 TH
0.0224845	4	259	5.76577	Positive regulation of cellular catabolic process	http://amigo.geneontology.org/amigo/term/GO:0031331	EXOSC5 EXOSC3 EXOSC9 ZFP36
0.022521	3	130	8.61538	Regulation of blood circulation	http://amigo.geneontology.org/amigo/term/GO:1903522	HDAC4 THRB TH
0.0225705	2	40	18.6667	PW:0000709 acute myeloid leukemia pathway	ftp://ftp.rgd.mcw.edu/pub/data_release	RARA ZBTB16
0.0225705	2	40	18.6667	Regulation of morphogenesis of a branching structure	http://amigo.geneontology.org/amigo/term/GO:0060688	AR ESR1
0.0226358	5	418	4.46571	Protein domain specific binding	http://amigo.geneontology.org/amigo/term/GO:0019904	HDAC1 SYP AR RELA RARA
0.0232952	7	800	3.26667	Peptidyl-amino acid modification	http://amigo.geneontology.org/amigo/term/GO:0018193	EP300 SIN3A MBIP NCOA7 RELA KAT2B HDAC4
0.0234412	8	1014	2.94543	Regulation of protein modification process	http://amigo.geneontology.org/amigo/term/GO:0031399	EP300 SIN3A NCOA7 BCL6 RELA HDAC3 KAT2B HDAC4
0.0234584	6	603	3.71476	Response to abiotic stimulus	http://amigo.geneontology.org/amigo/term/GO:0009628	EP300 RBBP7 RELA SLC25A23 YY1 TH
0.0234895	2	41	18.2114	Regulation of CD4-positive, alpha-beta T cell activation	http://amigo.geneontology.org/amigo/term/GO:2000514	BCL6 RARA
0.0234895	2	41	18.2114	Intermediate filament cytoskeleton organization	http://amigo.geneontology.org/amigo/term/GO:0045104	INA GFAP
0.0241092	11	1728	2.37654	Macromolecule localization	http://amigo.geneontology.org/amigo/term/GO:0033036	PPARA SIN3A EXOSC10 ACTB BCL6 AR HDAC3 GFAP ESR1 ZFP36 YY1
0.0244177	2	42	17.7778	Actomyosin	http://amigo.geneontology.org/amigo/term/GO:0042641	KAT2B HDAC4
0.0244177	2	42	17.7778	Neuron projection terminus	http://amigo.geneontology.org/amigo/term/GO:0044306	ACTB SYP
0.0244177	2	42	17.7778	Intermediate filament-based process	http://amigo.geneontology.org/amigo/term/GO:0045103	INA GFAP
0.0244177	2	42	17.7778	Positive regulation of alpha-beta T cell activation	http://amigo.geneontology.org/amigo/term/GO:0046635	RARA ZBTB16
0.0244177	2	42	17.7778	Negative regulation of small GTPase mediated signal transduction	http://amigo.geneontology.org/amigo/term/GO:0051058	BCL6 STMN1
0.0249942	3	136	8.23529	DOID:14330 Parkinson's disease	ftp://ftp.rgd.mcw.edu/pub/data_release	MAP2 GFAP TH
0.0250744	4	269	5.55143	Regionalization	http://amigo.geneontology.org/amigo/term/GO:0003002	EP300 AR ZBTB16 YY1
0.0253549	3	137	8.17518	DOID:3908 lung non-small cell carcinoma	ftp://ftp.rgd.mcw.edu/pub/data_release	SYP HDAC3 ESR1
0.0253549	2	43	17.3643	PW:0001274 RNA polymerase II transcription initiation pathway	ftp://ftp.rgd.mcw.edu/pub/data_release	MBIP KAT2B
0.0253549	2	43	17.3643	T-helper cell differentiation	http://amigo.geneontology.org/amigo/term/GO:0042093	BCL6 RARA
0.0253549	3	137	8.17518	Heart process	http://amigo.geneontology.org/amigo/term/GO:0003015	HDAC4 THRB TH
0.0258099	3	138	8.11594	Regulation of I-kappaB kinase/NF-kappaB signaling	http://amigo.geneontology.org/amigo/term/GO:0043122	HDAC1 RELA ESR1
0.0261939	2	44	16.9697	Protein kinase inhibitor activity	http://amigo.geneontology.org/amigo/term/GO:0004860	MBIP KAT2B
0.0261939	2	44	16.9697	DOID:12336 male infertility	ftp://ftp.rgd.mcw.edu/pub/data_release	AR ESR1
0.0261939	3	139	8.05755	Hexose metabolic process	http://amigo.geneontology.org/amigo/term/GO:0019318	PPARA EP300 KAT2B
0.0261939	2	44	16.9697	Interleukin-2 production	http://amigo.geneontology.org/amigo/term/GO:0032623	HDAC7 ZFP36
0.0261939	2	44	16.9697	Regulation of interleukin-2 production	http://amigo.geneontology.org/amigo/term/GO:0032663	HDAC7 ZFP36
0.0261939	2	44	16.9697	CD4-positive, alpha-beta T cell differentiation involved in immune response	http://amigo.geneontology.org/amigo/term/GO:0002294	BCL6 RARA
0.0261939	2	44	16.9697	Photoreceptor cell differentiation	http://amigo.geneontology.org/amigo/term/GO:0046530	THRB TH
0.0261939	3	139	8.05755	Stress-activated MAPK cascade	http://amigo.geneontology.org/amigo/term/GO:0051403	MBIP HDAC3 ZFP36
0.0262322	4	274	5.45012	Generation of precursor metabolites and energy	http://amigo.geneontology.org/amigo/term/GO:0006091	PPARA EP300 SLC25A23 HDAC4
0.0268684	4	276	5.41063	Circulatory system process	http://amigo.geneontology.org/amigo/term/GO:0003013	AR HDAC4 THRB TH
0.0269456	3	141	7.94326	Gonad development	http://amigo.geneontology.org/amigo/term/GO:0008406	AR RARA ESR1
0.0269456	3	141	7.94326	Regulation of myeloid cell differentiation	http://amigo.geneontology.org/amigo/term/GO:0045637	RARA ZFP36 ZBTB16
0.0269999	2	45	16.5926	Hormone binding	http://amigo.geneontology.org/amigo/term/GO:0042562	AR THRB
0.0269999	2	45	16.5926	DOID:0060193 amyotrophic lateral sclerosis type 1	ftp://ftp.rgd.mcw.edu/pub/data_release	INA GFAP
0.0269999	2	45	16.5926	Alpha-beta T cell activation involved in immune response	http://amigo.geneontology.org/amigo/term/GO:0002287	BCL6 RARA
0.0269999	2	45	16.5926	Alpha-beta T cell differentiation involved in immune response	http://amigo.geneontology.org/amigo/term/GO:0002293	BCL6 RARA
0.0269999	2	45	16.5926	Modulation by host of symbiont process	http://amigo.geneontology.org/amigo/term/GO:0051851	EP300 HDAC1
0.0269999	5	441	4.2328	Regulation of cellular response to stress	http://amigo.geneontology.org/amigo/term/GO:0080135	MBIP NCOA7 BCL6 SLC25A23 HDAC3
0.0276395	3	143	7.83217	Stress-activated protein kinase signaling cascade	http://amigo.geneontology.org/amigo/term/GO:0031098	MBIP HDAC3 ZFP36
0.0276395	3	143	7.83217	Negative regulation of growth	http://amigo.geneontology.org/amigo/term/GO:0045926	BCL6 RBBP7 CDHR2
0.0276395	3	143	7.83217	Appendage development	http://amigo.geneontology.org/amigo/term/GO:0048736	HDAC1 RARA ZBTB16
0.0276395	3	143	7.83217	Limb development	http://amigo.geneontology.org/amigo/term/GO:0060173	HDAC1 RARA ZBTB16
0.0277601	5	445	4.19476	Negative regulation of cell population proliferation	http://amigo.geneontology.org/amigo/term/GO:0008285	BCL6 AR KAT2B HDAC4 ZBTB16
0.0278337	2	46	16.2319	Cocaine addiction	http://www.genome.jp/kegg-bin/show_pathway?ssc05030	RELA TH
0.0278337	2	46	16.2319	DOID:9003676 Hypoxia-Ischemia Brain	ftp://ftp.rgd.mcw.edu/pub/data_release	HDAC3 MAP2
0.0278337	2	46	16.2319	Circadian regulation of gene expression	http://amigo.geneontology.org/amigo/term/GO:0032922	PPARA HDAC1
0.0278337	2	46	16.2319	Positive regulation of fat cell differentiation	http://amigo.geneontology.org/amigo/term/GO:0045600	ZFP36 ZBTB16
0.0278337	5	446	4.18535	Embryonic morphogenesis	http://amigo.geneontology.org/amigo/term/GO:0048598	HDAC1 AR RARA ZBTB16 TH
0.0278784	4	281	5.31435	DOID:10763 hypertension	ftp://ftp.rgd.mcw.edu/pub/data_release	EP300 PPARG AR TH
0.0278784	3	144	7.77778	Glial cell differentiation	http://amigo.geneontology.org/amigo/term/GO:0010001	HDAC1 OLIG1 GFAP
0.0281542	4	282	5.29551	Huntington disease	http://www.genome.jp/kegg-bin/show_pathway?ssc05016	EP300 SIN3A HDAC1 PPARG
0.0282284	3	145	7.72414	Cytoplasmic ribonucleoprotein granule	http://amigo.geneontology.org/amigo/term/GO:0036464	ACTB INA ZFP36
0.0282284	3	145	7.72414	Development of primary sexual characteristics	http://amigo.geneontology.org/amigo/term/GO:0045137	AR RARA ESR1
0.0282284	3	145	7.72414	Defense response to virus	http://amigo.geneontology.org/amigo/term/GO:0051607	SIN3A EXOSC5 EXOSC4
0.0282284	3	145	7.72414	Defense response to symbiont	http://amigo.geneontology.org/amigo/term/GO:0140546	SIN3A EXOSC5 EXOSC4
0.0286915	2	47	15.8865	Regulation of morphogenesis of an epithelium	http://amigo.geneontology.org/amigo/term/GO:1905330	AR ESR1
0.0286916	3	146	7.67123	Non-alcoholic fatty liver disease	http://www.genome.jp/kegg-bin/show_pathway?ssc04932	PPARA PPARG RELA
0.0291963	3	147	7.61905	Influenza A	http://www.genome.jp/kegg-bin/show_pathway?ssc05164	EP300 ACTB RELA
0.0297058	3	148	7.56757	Response to lipopolysaccharide	http://amigo.geneontology.org/amigo/term/GO:0032496	RELA RARA ZFP36
0.0297328	2	48	15.5556	Kinase inhibitor activity	http://amigo.geneontology.org/amigo/term/GO:0019210	MBIP KAT2B
0.0299467	1	3	124.444	Negative regulation of guanyl-nucleotide exchange factor activity	http://amigo.geneontology.org/amigo/term/GO:1905098	STMN1
0.0299467	6	646	3.46749	Peptide metabolic process	http://amigo.geneontology.org/amigo/term/GO:0006518	EXOSC5 EXOSC3 EXOSC9 RELA ZFP36 KCNMB3
0.0299467	1	3	124.444	Astrocyte end-foot	http://amigo.geneontology.org/amigo/term/GO:0097450	GFAP
0.0299467	1	3	124.444	Postsynaptic actin cytoskeleton	http://amigo.geneontology.org/amigo/term/GO:0098871	ACTB
0.0299467	6	655	3.41985	Supramolecular complex	http://amigo.geneontology.org/amigo/term/GO:0099080	SIN3A ACTB INA GFAP KAT2B ZFP36
0.0299467	2	49	15.2381	N-acetyltransferase activity	http://amigo.geneontology.org/amigo/term/GO:0008080	EP300 KAT2B
0.0299467	6	653	3.43032	Cytoskeletal protein binding	http://amigo.geneontology.org/amigo/term/GO:0008092	ACTB RELA MAP2 RARA PFN1 STMN1
0.0299467	1	3	124.444	H3 histone acetyltransferase activity	http://amigo.geneontology.org/amigo/term/GO:0010484	EP300
0.0299467	1	3	124.444	Estrogen response element binding	http://amigo.geneontology.org/amigo/term/GO:0034056	ESR1
0.0299467	1	3	124.444	Ankyrin repeat binding	http://amigo.geneontology.org/amigo/term/GO:0071532	RELA
0.0299467	1	3	124.444	Structural constituent of postsynaptic intermediate filament cytoskeleton	http://amigo.geneontology.org/amigo/term/GO:0099184	INA
0.0299467	1	3	124.444	Ssc-miR-27b-3p target gene	http://mirtarbase.mbc.nctu.edu.tw	PPARG
0.0299467	1	3	124.444	TRAF6 mediated IRF7 activation	https://reactome.org/download/current	EP300
0.0299467	1	3	124.444	Catecholamine biosynthesis	https://reactome.org/download/current	TH
0.0299467	1	3	124.444	Courtship behavior	http://amigo.geneontology.org/amigo/term/GO:0007619	THRB
0.0299467	2	50	14.9333	DOID:1094 attention deficit hyperactivity disorder	ftp://ftp.rgd.mcw.edu/pub/data_release	AR THRB
0.0299467	2	49	15.2381	DOID:418 systemic scleroderma	ftp://ftp.rgd.mcw.edu/pub/data_release	HDAC5 ESR1
0.0299467	1	3	124.444	DOID:9002239 Estrogen Resistance	ftp://ftp.rgd.mcw.edu/pub/data_release	ESR1
0.0299467	1	3	124.444	DOID:0060266 pontocerebellar hypoplasia type 1B	ftp://ftp.rgd.mcw.edu/pub/data_release	EXOSC3
0.0299467	1	3	124.444	DOID:5463 cochlear disease	ftp://ftp.rgd.mcw.edu/pub/data_release	SYP
0.0299467	1	3	124.444	DOID:9007921 Spina Bifida Cystica	ftp://ftp.rgd.mcw.edu/pub/data_release	GFAP
0.0299467	1	3	124.444	DOID:12704 ataxia telangiectasia	ftp://ftp.rgd.mcw.edu/pub/data_release	HDAC4
0.0299467	1	3	124.444	DOID:9004035 Segawa Syndrome Autosomal Recessive	ftp://ftp.rgd.mcw.edu/pub/data_release	TH
0.0299467	1	3	124.444	DOID:9001256 Chromosome 2q37 Deletion Syndrome	ftp://ftp.rgd.mcw.edu/pub/data_release	HDAC4
0.0299467	1	3	124.444	DOID:9003748 Thumb Deformity	ftp://ftp.rgd.mcw.edu/pub/data_release	EP300
0.0299467	1	3	124.444	DOID:9004980 Chronobiology Disorders	ftp://ftp.rgd.mcw.edu/pub/data_release	PPARG
0.0299467	1	3	124.444	DOID:8029 sporadic breast cancer	ftp://ftp.rgd.mcw.edu/pub/data_release	ESR1
0.0299467	1	3	124.444	DOID:0070227 intrahepatic cholestasis of pregnancy	ftp://ftp.rgd.mcw.edu/pub/data_release	HDAC3
0.0299467	1	3	124.444	DOID:9005228 Musculoskeletal Pain	ftp://ftp.rgd.mcw.edu/pub/data_release	ESR1
0.0299467	1	3	124.444	DOID:12995 conduct disorder	ftp://ftp.rgd.mcw.edu/pub/data_release	AR
0.0299467	1	3	124.444	Schwann cell proliferation	http://amigo.geneontology.org/amigo/term/GO:0014010	GFAP
0.0299467	1	3	124.444	PW:0000804 norepinephrine biosynthetic pathway	ftp://ftp.rgd.mcw.edu/pub/data_release	TH
0.0299467	1	3	124.444	PW:0001511 bisphenol A response pathway	ftp://ftp.rgd.mcw.edu/pub/data_release	ESR1
0.0299467	2	50	14.9333	Regulation of Rho protein signal transduction	http://amigo.geneontology.org/amigo/term/GO:0035023	BCL6 STMN1
0.0299467	2	49	15.2381	T cell differentiation involved in immune response	http://amigo.geneontology.org/amigo/term/GO:0002292	BCL6 RARA
0.0299467	1	3	124.444	Germ-line stem cell division	http://amigo.geneontology.org/amigo/term/GO:0042078	ZBTB16
0.0299467	3	150	7.46667	Regulation of protein binding	http://amigo.geneontology.org/amigo/term/GO:0043393	EP300 ACTB HDAC4
0.0299467	1	3	124.444	Histone H2B acetylation	http://amigo.geneontology.org/amigo/term/GO:0043969	EP300
0.0299467	1	3	124.444	Histone H3-K27 acetylation	http://amigo.geneontology.org/amigo/term/GO:0043974	SIN3A
0.0299467	1	3	124.444	Positive regulation of T-helper 2 cell differentiation	http://amigo.geneontology.org/amigo/term/GO:0045630	RARA
0.0299467	1	3	124.444	Positive regulation of integrin biosynthetic process	http://amigo.geneontology.org/amigo/term/GO:0045726	AR
0.0299467	4	289	5.16724	Positive regulation of cell adhesion	http://amigo.geneontology.org/amigo/term/GO:0045785	BCL6 RELA RARA ZBTB16
0.0299467	1	3	124.444	Positive regulation of RNA polymerase II transcription preinitiation complex assembly	http://amigo.geneontology.org/amigo/term/GO:0045899	ESR1
0.0299467	3	149	7.51678	Positive regulation of growth	http://amigo.geneontology.org/amigo/term/GO:0045927	EXOSC2 EXOSC4 EXOSC9
0.0299467	1	3	124.444	Male germ-line stem cell asymmetric division	http://amigo.geneontology.org/amigo/term/GO:0048133	ZBTB16
0.0299467	1	3	124.444	Negative regulation of isotype switching to IgE isotypes	http://amigo.geneontology.org/amigo/term/GO:0048294	BCL6
0.0299467	1	3	124.444	Male genitalia morphogenesis	http://amigo.geneontology.org/amigo/term/GO:0048808	AR
0.0299467	3	149	7.51678	Regulation of leukocyte mediated immunity	http://amigo.geneontology.org/amigo/term/GO:0002703	EXOSC6 EXOSC3 BCL6
0.0299467	1	3	124.444	Positive regulation of NK T cell differentiation	http://amigo.geneontology.org/amigo/term/GO:0051138	ZBTB16
0.0299467	1	3	124.444	Prostate glandular acinus morphogenesis	http://amigo.geneontology.org/amigo/term/GO:0060526	ESR1
0.0299467	1	3	124.444	Prostate epithelial cord arborization involved in prostate glandular acinus morphogenesis	http://amigo.geneontology.org/amigo/term/GO:0060527	ESR1
0.0299467	1	3	124.444	Prostate gland morphogenetic growth	http://amigo.geneontology.org/amigo/term/GO:0060737	ESR1
0.0299467	1	3	124.444	Positive regulation of epithelial cell proliferation involved in prostate gland development	http://amigo.geneontology.org/amigo/term/GO:0060769	AR
0.0299467	1	3	124.444	Regulation of thrombin-activated receptor signaling pathway	http://amigo.geneontology.org/amigo/term/GO:0070494	STMN1
0.0299467	1	3	124.444	Negative regulation of thrombin-activated receptor signaling pathway	http://amigo.geneontology.org/amigo/term/GO:0070495	STMN1
0.0299467	1	3	124.444	Cellular response to peptidoglycan	http://amigo.geneontology.org/amigo/term/GO:0071224	RELA
0.0299467	1	3	124.444	Protein localization to adherens junction	http://amigo.geneontology.org/amigo/term/GO:0071896	ACTB
0.0299467	1	3	124.444	Male anatomical structure morphogenesis	http://amigo.geneontology.org/amigo/term/GO:0090598	AR
0.0299467	1	3	124.444	Urea homeostasis	http://amigo.geneontology.org/amigo/term/GO:0097274	SLC25A23
0.0299467	1	3	124.444	Asymmetric stem cell division	http://amigo.geneontology.org/amigo/term/GO:0098722	ZBTB16
0.0299467	1	3	124.444	Germline stem cell asymmetric division	http://amigo.geneontology.org/amigo/term/GO:0098728	ZBTB16
0.0299467	1	3	124.444	Regulation of transepithelial transport	http://amigo.geneontology.org/amigo/term/GO:0150111	ACTB
0.0299467	2	49	15.2381	Positive regulation of NIK/NF-kappaB signaling	http://amigo.geneontology.org/amigo/term/GO:1901224	EP300 RELA
0.0299467	1	3	124.444	Regulation of histone H3-K27 acetylation	http://amigo.geneontology.org/amigo/term/GO:1901674	SIN3A
0.0299659	3	153	7.32026	Monosaccharide metabolic process	http://amigo.geneontology.org/amigo/term/GO:0005996	PPARA EP300 KAT2B
0.0303948	3	154	7.27273	Nuclease activity	http://amigo.geneontology.org/amigo/term/GO:0004518	EXOSC10 DIS3L DIS3
0.0303948	3	154	7.27273	Epithelial cell development	http://amigo.geneontology.org/amigo/term/GO:0002064	AR RARA ESR1
0.0303948	3	154	7.27273	Positive regulation of immune effector process	http://amigo.geneontology.org/amigo/term/GO:0002699	EXOSC6 EXOSC3 RARA
0.0306162	2	51	14.6405	Regulation of gliogenesis	http://amigo.geneontology.org/amigo/term/GO:0014013	HDAC1 GFAP
0.0306162	2	51	14.6405	Regulation of cartilage development	http://amigo.geneontology.org/amigo/term/GO:0061035	RARA ZBTB16
0.0306162	2	51	14.6405	Myeloid cell development	http://amigo.geneontology.org/amigo/term/GO:0061515	EP300 BCL6
0.0310671	5	470	3.97163	DOID:10283 prostate cancer	ftp://ftp.rgd.mcw.edu/pub/data_release	EP300 DIS3L AR ESR1 THRB
0.0312974	3	156	7.17949	Ribonucleoprotein granule	http://amigo.geneontology.org/amigo/term/GO:0035770	ACTB INA ZFP36
0.0314104	8	1097	2.72258	Cellular macromolecule localization	http://amigo.geneontology.org/amigo/term/GO:0070727	SIN3A EXOSC10 ACTB AR HDAC3 GFAP ESR1 ZFP36
0.0316362	2	52	14.359	DOID:3328 temporal lobe epilepsy	ftp://ftp.rgd.mcw.edu/pub/data_release	ACTB MAP2
0.0316597	3	157	7.13376	Wnt signaling pathway	http://www.genome.jp/kegg-bin/show_pathway?ssc04310	EP300 TBL1XR1 TBL1X
0.0316597	4	301	4.96124	Positive regulation of catabolic process	http://amigo.geneontology.org/amigo/term/GO:0009896	EXOSC5 EXOSC3 EXOSC9 ZFP36
0.0316597	3	157	7.13376	Respiratory system development	http://amigo.geneontology.org/amigo/term/GO:0060541	EP300 RARA THRB
0.0326662	2	53	14.0881	Mammary gland epithelium development	http://amigo.geneontology.org/amigo/term/GO:0061180	AR ESR1
0.0326929	3	159	7.04403	Response to molecule of bacterial origin	http://amigo.geneontology.org/amigo/term/GO:0002237	RELA RARA ZFP36
0.0332161	3	160	7	Negative regulation of apoptotic signaling pathway	http://amigo.geneontology.org/amigo/term/GO:2001234	HDAC1 AR RELA
0.0336273	2	54	13.8272	P53 binding	http://amigo.geneontology.org/amigo/term/GO:0002039	EP300 HDAC1
0.0336273	2	54	13.8272	C-type lectin receptors (CLRs)	https://reactome.org/download/current	EP300 RELA
0.0336273	3	161	6.95652	I-kappaB kinase/NF-kappaB signaling	http://amigo.geneontology.org/amigo/term/GO:0007249	HDAC1 RELA ESR1
0.0336273	2	54	13.8272	Regulation of neurotransmitter transport	http://amigo.geneontology.org/amigo/term/GO:0051588	SYP GFAP
0.0347555	2	55	13.5758	Regulation of epithelial cell apoptotic process	http://amigo.geneontology.org/amigo/term/GO:1904035	PPARA ZFP36
0.0347555	2	55	13.5758	ATPase binding	http://amigo.geneontology.org/amigo/term/GO:0051117	AR ESR1
0.0351886	3	164	6.82927	PIP3 activates AKT signaling	https://reactome.org/download/current	HDAC1 RBBP7 RBBP4
0.0351886	3	164	6.82927	Lymphocyte mediated immunity	http://amigo.geneontology.org/amigo/term/GO:0002449	EXOSC6 EXOSC3 BCL6
0.0357728	2	56	13.3333	PRC2 methylates histones and DNA	https://reactome.org/download/current	RBBP7 RBBP4
0.0357728	2	56	13.3333	CD4-positive, alpha-beta T cell differentiation	http://amigo.geneontology.org/amigo/term/GO:0043367	BCL6 RARA
0.0357728	2	56	13.3333	Positive regulation of neuron differentiation	http://amigo.geneontology.org/amigo/term/GO:0045666	SIN3A BCL6
0.0363503	1	4	93.3333	Regulation of chaperone-mediated autophagy	http://amigo.geneontology.org/amigo/term/GO:1904714	GFAP
0.0363503	1	4	93.3333	Spanning component of plasma membrane	http://amigo.geneontology.org/amigo/term/GO:0044214	CDHR2
0.0363503	1	4	93.3333	Spanning component of membrane	http://amigo.geneontology.org/amigo/term/GO:0089717	CDHR2
0.0363503	1	4	93.3333	CD4 receptor binding	http://amigo.geneontology.org/amigo/term/GO:0042609	SPG21
0.0363503	1	4	93.3333	Pre-mRNA intronic binding	http://amigo.geneontology.org/amigo/term/GO:0097157	EP300
0.0363503	1	4	93.3333	STAT family protein binding	http://amigo.geneontology.org/amigo/term/GO:0097677	EP300
0.0363503	3	168	6.66667	Kaposi sarcoma-associated herpesvirus infection	http://www.genome.jp/kegg-bin/show_pathway?ssc05167	EP300 RELA ZFP36
0.0363503	4	320	4.66667	DOID:1909 melanoma	ftp://ftp.rgd.mcw.edu/pub/data_release	EP300 PPARG HDAC3 ESR1
0.0363503	2	58	12.8736	DOID:9006646 Metabolic Syndrome	ftp://ftp.rgd.mcw.edu/pub/data_release	PPARG HDAC3
0.0363503	1	4	93.3333	DOID:9005040 Hand Osteoarthritis	ftp://ftp.rgd.mcw.edu/pub/data_release	ESR1
0.0363503	1	4	93.3333	DOID:2988 antiphospholipid syndrome	ftp://ftp.rgd.mcw.edu/pub/data_release	PPARG
0.0363503	1	4	93.3333	DOID:9006008 Head Injuries Closed	ftp://ftp.rgd.mcw.edu/pub/data_release	GFAP
0.0363503	1	4	93.3333	DOID:1934 dysostosis	ftp://ftp.rgd.mcw.edu/pub/data_release	ACTB
0.0363503	1	4	93.3333	DOID:9002407 Spinal Fractures	ftp://ftp.rgd.mcw.edu/pub/data_release	ESR1
0.0363503	1	4	93.3333	DOID:9000357 Male Breast Neoplasms	ftp://ftp.rgd.mcw.edu/pub/data_release	AR
0.0363503	1	4	93.3333	DOID:9006947 Fibroadenoma	ftp://ftp.rgd.mcw.edu/pub/data_release	RARA
0.0363503	1	4	93.3333	DOID:9004272 Varicose Ulcer	ftp://ftp.rgd.mcw.edu/pub/data_release	ESR1
0.0363503	1	4	93.3333	DOID:11633 thyroid hormone resistance syndrome	ftp://ftp.rgd.mcw.edu/pub/data_release	THRB
0.0363503	3	168	6.66667	Anterior/posterior pattern specification	http://amigo.geneontology.org/amigo/term/GO:0009952	EP300 ZBTB16 YY1
0.0363503	1	4	93.3333	DOID:9000466 Prostate Cancer Somatic	ftp://ftp.rgd.mcw.edu/pub/data_release	AR
0.0363503	1	4	93.3333	DOID:9004078 Pancreatic Intraepithelial Neoplasia	ftp://ftp.rgd.mcw.edu/pub/data_release	HDAC1
0.0363503	1	4	93.3333	Negative regulation of sequestering of triglyceride	http://amigo.geneontology.org/amigo/term/GO:0010891	PPARA
0.0363503	1	4	93.3333	PW:0000839 tamoxifen pharmacodynamics pathway	ftp://ftp.rgd.mcw.edu/pub/data_release	ESR1
0.0363503	1	4	93.3333	Response to inactivity	http://amigo.geneontology.org/amigo/term/GO:0014854	HDAC4
0.0363503	1	4	93.3333	Response to muscle inactivity	http://amigo.geneontology.org/amigo/term/GO:0014870	HDAC4
0.0363503	1	4	93.3333	Response to muscle inactivity involved in regulation of muscle adaptation	http://amigo.geneontology.org/amigo/term/GO:0014877	HDAC4
0.0363503	1	4	93.3333	Response to denervation involved in regulation of muscle adaptation	http://amigo.geneontology.org/amigo/term/GO:0014894	HDAC4
0.0363503	1	4	93.3333	PW:0000803 epinephrine biosynthetic pathway	ftp://ftp.rgd.mcw.edu/pub/data_release	TH
0.0363503	1	4	93.3333	PW:0001235 catecholamine biosynthetic pathway	ftp://ftp.rgd.mcw.edu/pub/data_release	TH
0.0363503	1	4	93.3333	PW:0002324 aromatic L-amino acid decarboxylase deficiency pathway	ftp://ftp.rgd.mcw.edu/pub/data_release	TH
0.0363503	5	493	3.78634	Regulation of cell adhesion	http://amigo.geneontology.org/amigo/term/GO:0030155	PPARA BCL6 RELA RARA ZBTB16
0.0363503	2	57	13.0994	Interleukin-8 production	http://amigo.geneontology.org/amigo/term/GO:0032637	ANXA4 RELA
0.0363503	2	57	13.0994	Regulation of interleukin-8 production	http://amigo.geneontology.org/amigo/term/GO:0032677	ANXA4 RELA
0.0363503	1	4	93.3333	Norepinephrine biosynthetic process	http://amigo.geneontology.org/amigo/term/GO:0042421	TH
0.0363503	1	4	93.3333	Regulation of integrin biosynthetic process	http://amigo.geneontology.org/amigo/term/GO:0045113	AR
0.0363503	3	169	6.62722	Fat cell differentiation	http://amigo.geneontology.org/amigo/term/GO:0045444	EP300 ZFP36 ZBTB16
0.0363503	1	4	93.3333	Regulation of female receptivity	http://amigo.geneontology.org/amigo/term/GO:0045924	THRB
0.0363503	1	4	93.3333	Isotype switching to IgE isotypes	http://amigo.geneontology.org/amigo/term/GO:0048289	BCL6
0.0363503	1	4	93.3333	Regulation of isotype switching to IgE isotypes	http://amigo.geneontology.org/amigo/term/GO:0048293	BCL6
0.0363503	1	4	93.3333	Regulation of skeletal muscle fiber development	http://amigo.geneontology.org/amigo/term/GO:0048742	HDAC4
0.0363503	1	4	93.3333	Regulation of NK T cell differentiation	http://amigo.geneontology.org/amigo/term/GO:0051136	ZBTB16
0.0363503	1	4	93.3333	Female mating behavior	http://amigo.geneontology.org/amigo/term/GO:0060180	THRB
0.0363503	1	4	93.3333	Chondroblast differentiation	http://amigo.geneontology.org/amigo/term/GO:0060591	RARA
0.0363503	1	4	93.3333	Regulation of branching involved in prostate gland morphogenesis	http://amigo.geneontology.org/amigo/term/GO:0060687	ESR1
0.0363503	1	4	93.3333	Epithelial cell proliferation involved in mammary gland duct elongation	http://amigo.geneontology.org/amigo/term/GO:0060750	ESR1
0.0363503	1	4	93.3333	Hair follicle placode formation	http://amigo.geneontology.org/amigo/term/GO:0060789	HDAC1
0.0363503	1	4	93.3333	Fungiform papilla morphogenesis	http://amigo.geneontology.org/amigo/term/GO:0061197	HDAC1
0.0363503	1	4	93.3333	D-aspartate transport	http://amigo.geneontology.org/amigo/term/GO:0070777	GFAP
0.0363503	1	4	93.3333	D-aspartate import across plasma membrane	http://amigo.geneontology.org/amigo/term/GO:0070779	GFAP
0.0363503	1	4	93.3333	Postsynapse to nucleus signaling pathway	http://amigo.geneontology.org/amigo/term/GO:0099527	RELA
0.0363503	1	4	93.3333	Regulation of cellular hyperosmotic salinity response	http://amigo.geneontology.org/amigo/term/GO:1900069	SLC25A23
0.0363503	1	4	93.3333	Regulation of response to salt stress	http://amigo.geneontology.org/amigo/term/GO:1901000	SLC25A23
0.0363503	1	4	93.3333	Negative regulation of peptidyl-cysteine S-nitrosylation	http://amigo.geneontology.org/amigo/term/GO:1902083	NCOA7
0.0371308	4	323	4.62332	Actin cytoskeleton	http://amigo.geneontology.org/amigo/term/GO:0015629	ACTB RARA KAT2B HDAC4
0.0371308	2	59	12.6554	DOID:769 neuroblastoma	ftp://ftp.rgd.mcw.edu/pub/data_release	ESR1 TH
0.0371308	2	59	12.6554	Odontogenesis of dentin-containing tooth	http://amigo.geneontology.org/amigo/term/GO:0042475	PPARA HDAC1
0.0371308	2	59	12.6554	Biological process involved in interaction with symbiont	http://amigo.geneontology.org/amigo/term/GO:0051702	EP300 HDAC1
0.037369	5	503	3.71107	Regulation of cellular catabolic process	http://amigo.geneontology.org/amigo/term/GO:0031329	EXOSC5 EXOSC3 EXOSC9 GFAP ZFP36
0.037369	3	172	6.51163	Adaptive immune response based on somatic recombination of immune receptors built from immunoglobulin superfamily domains	http://amigo.geneontology.org/amigo/term/GO:0002460	EXOSC6 EXOSC3 BCL6
0.0378786	3	173	6.47399	Cell fate commitment	http://amigo.geneontology.org/amigo/term/GO:0045165	OLIG1 AR RARA
0.0379345	2	60	12.4444	DOID:2349 arteriosclerosis	ftp://ftp.rgd.mcw.edu/pub/data_release	PPARG ESR1
0.0379345	2	60	12.4444	DOID:1936 atherosclerosis	ftp://ftp.rgd.mcw.edu/pub/data_release	PPARG ESR1
0.0379345	2	60	12.4444	DOID:8947 diabetic retinopathy	ftp://ftp.rgd.mcw.edu/pub/data_release	EP300 PPARG
0.0379345	2	60	12.4444	PW:0000360 hypoxia inducible factor pathway	ftp://ftp.rgd.mcw.edu/pub/data_release	EP300 HDAC7
0.0379345	2	60	12.4444	Modulation of process of other organism involved in symbiotic interaction	http://amigo.geneontology.org/amigo/term/GO:0051817	EP300 HDAC1
0.0379345	2	60	12.4444	Response to interleukin-1	http://amigo.geneontology.org/amigo/term/GO:0070555	RELA HDAC4
0.0381814	3	174	6.43678	Cell body	http://amigo.geneontology.org/amigo/term/GO:0044297	HDAC1 GFAP TH
0.0384719	9	1398	2.40343	Cytoskeleton	http://amigo.geneontology.org/amigo/term/GO:0005856	DIS3L ACTB INA TBL1XR1 HDAC3 GFAP RARA KAT2B HDAC4
0.038944	2	61	12.2404	Deposition of new CENPA-containing nucleosomes at the centromere	https://reactome.org/download/current	RBBP7 RBBP4
0.038944	2	61	12.2404	Nucleosome assembly	https://reactome.org/download/current	RBBP7 RBBP4
0.038944	2	61	12.2404	DOID:3587 pancreatic ductal carcinoma	ftp://ftp.rgd.mcw.edu/pub/data_release	HDAC1 PPARG
0.0396361	4	331	4.51158	Pattern specification process	http://amigo.geneontology.org/amigo/term/GO:0007389	EP300 AR ZBTB16 YY1
0.0396361	3	177	6.32768	Sex differentiation	http://amigo.geneontology.org/amigo/term/GO:0007548	AR RARA ESR1
0.0396361	3	177	6.32768	DOID:1612 breast cancer	ftp://ftp.rgd.mcw.edu/pub/data_release	KAT2B ESR1 THRB
0.0396361	11	1919	2.14	Cellular component biogenesis	http://amigo.geneontology.org/amigo/term/GO:0044085	EP300 EXOSC10 EXOSC3 EXOSC4 ACTB CDHR2 HDAC3 KAT2B ESR1 STMN1 HDAC7
0.0398323	2	62	12.043	DOID:9002955 Nerve Degeneration	ftp://ftp.rgd.mcw.edu/pub/data_release	PPARG TH
0.0398323	2	62	12.043	DOID:1790 malignant mesothelioma	ftp://ftp.rgd.mcw.edu/pub/data_release	TBL1XR1 HDAC4
0.0398323	2	62	12.043	Hair follicle development	http://amigo.geneontology.org/amigo/term/GO:0001942	HDAC1 RELA
0.0398323	2	62	12.043	Response to ketone	http://amigo.geneontology.org/amigo/term/GO:1901654	SIN3A AR
0.0409378	2	63	11.8519	Amphetamine addiction	http://www.genome.jp/kegg-bin/show_pathway?ssc05031	HDAC1 TH
0.0409378	2	63	11.8519	DOID:2394 ovarian cancer	ftp://ftp.rgd.mcw.edu/pub/data_release	HDAC3 ESR1
0.0409378	2	63	11.8519	Oligodendrocyte differentiation	http://amigo.geneontology.org/amigo/term/GO:0048709	HDAC1 OLIG1
0.0419016	1	5	74.6667	Negative regulation of reactive oxygen species biosynthetic process	http://amigo.geneontology.org/amigo/term/GO:1903427	PPARA
0.0419016	1	5	74.6667	Brush border assembly	http://amigo.geneontology.org/amigo/term/GO:1904970	CDHR2
0.0419016	1	5	74.6667	Regulation of guanyl-nucleotide exchange factor activity	http://amigo.geneontology.org/amigo/term/GO:1905097	STMN1
0.0419016	1	5	74.6667	Hyaloid vascular plexus regression	http://amigo.geneontology.org/amigo/term/GO:1990384	TH
0.0419016	1	5	74.6667	Regulation of peptidyl-cysteine S-nitrosylation	http://amigo.geneontology.org/amigo/term/GO:2000169	NCOA7
0.0419016	1	5	74.6667	Positive regulation of ATP biosynthetic process	http://amigo.geneontology.org/amigo/term/GO:2001171	PPARA
0.0419016	5	527	3.54206	Translation	http://amigo.geneontology.org/amigo/term/GO:0006412	EXOSC5 EXOSC3 EXOSC9 ZFP36 KCNMB3
0.0419016	1	5	74.6667	Melanosome membrane	http://amigo.geneontology.org/amigo/term/GO:0033162	TH
0.0419016	1	5	74.6667	Chitosome	http://amigo.geneontology.org/amigo/term/GO:0045009	TH
0.0419016	1	5	74.6667	Pigment granule membrane	http://amigo.geneontology.org/amigo/term/GO:0090741	TH
0.0419016	1	5	74.6667	Transcription preinitiation complex	http://amigo.geneontology.org/amigo/term/GO:0097550	ESR1
0.0419016	1	5	74.6667	Estrogen receptor activity	http://amigo.geneontology.org/amigo/term/GO:0030284	ESR1
0.0419016	1	5	74.6667	Thyroid hormone binding	http://amigo.geneontology.org/amigo/term/GO:0070324	THRB
0.0419016	1	5	74.6667	DOID:9001036 Head Injuries Penetrating	ftp://ftp.rgd.mcw.edu/pub/data_release	GFAP
0.0419016	1	5	74.6667	DOID:11717 neonatal diabetes mellitus	ftp://ftp.rgd.mcw.edu/pub/data_release	TH
0.0419016	1	5	74.6667	DOID:0111152 multicentric Castleman disease	ftp://ftp.rgd.mcw.edu/pub/data_release	AR
0.0419016	1	5	74.6667	DOID:680 tauopathy	ftp://ftp.rgd.mcw.edu/pub/data_release	HDAC1
0.0419016	1	5	74.6667	DOID:9005166 Contusions	ftp://ftp.rgd.mcw.edu/pub/data_release	TH
0.0419016	1	5	74.6667	DOID:12935 alcoholic cardiomyopathy	ftp://ftp.rgd.mcw.edu/pub/data_release	PPARG
0.0419016	1	5	74.6667	DOID:14499 Fabry disease	ftp://ftp.rgd.mcw.edu/pub/data_release	AR
0.0419016	1	5	74.6667	DOID:9001315 Autosomal Recessive Spinocerebellar Ataxia 8	ftp://ftp.rgd.mcw.edu/pub/data_release	ESR1
0.0419016	1	5	74.6667	Negative regulation of cholesterol storage	http://amigo.geneontology.org/amigo/term/GO:0010887	PPARA
0.0419016	5	527	3.54206	Carboxylic acid metabolic process	http://amigo.geneontology.org/amigo/term/GO:0019752	PPARA EP300 HDAC4 KCNMB3 TH
0.0419016	2	65	11.4872	Molting cycle process	http://amigo.geneontology.org/amigo/term/GO:0022404	HDAC1 RELA
0.0419016	2	65	11.4872	Hair cycle process	http://amigo.geneontology.org/amigo/term/GO:0022405	HDAC1 RELA
0.0419016	1	5	74.6667	Regulation of microvillus length	http://amigo.geneontology.org/amigo/term/GO:0032532	CDHR2
0.0419016	1	5	74.6667	Immunoglobulin V(D)J recombination	http://amigo.geneontology.org/amigo/term/GO:0033152	YY1
0.0419016	2	64	11.6667	Cellular response to UV	http://amigo.geneontology.org/amigo/term/GO:0034644	EP300 YY1
0.0419016	2	65	11.4872	T cell activation involved in immune response	http://amigo.geneontology.org/amigo/term/GO:0002286	BCL6 RARA
0.0419016	6	731	3.0643	Tube development	http://amigo.geneontology.org/amigo/term/GO:0035295	EP300 AR RARA ESR1 HDAC7 THRB
0.0419016	1	5	74.6667	Integrin biosynthetic process	http://amigo.geneontology.org/amigo/term/GO:0045112	AR
0.0419016	1	5	74.6667	Negative regulation of T-helper 2 cell differentiation	http://amigo.geneontology.org/amigo/term/GO:0045629	BCL6
0.0419016	1	5	74.6667	Negative regulation of isotype switching	http://amigo.geneontology.org/amigo/term/GO:0045829	BCL6
0.0419016	1	5	74.6667	Regulation of RNA polymerase II transcription preinitiation complex assembly	http://amigo.geneontology.org/amigo/term/GO:0045898	ESR1
0.0419016	1	5	74.6667	Norepinephrine uptake	http://amigo.geneontology.org/amigo/term/GO:0051620	ACTB
0.0419016	5	525	3.55556	Regulation of cellular localization	http://amigo.geneontology.org/amigo/term/GO:0060341	SIN3A ACTB AR HDAC3 ZFP36
0.0419016	1	5	74.6667	Type I pneumocyte differentiation	http://amigo.geneontology.org/amigo/term/GO:0060509	THRB
0.0419016	1	5	74.6667	Branch elongation involved in mammary gland duct branching	http://amigo.geneontology.org/amigo/term/GO:0060751	ESR1
0.0419016	1	5	74.6667	Fungiform papilla development	http://amigo.geneontology.org/amigo/term/GO:0061196	HDAC1
0.0419016	2	65	11.4872	Positive regulation of small molecule metabolic process	http://amigo.geneontology.org/amigo/term/GO:0062013	PPARA KAT2B
0.0419016	1	5	74.6667	Cellular response to nicotine	http://amigo.geneontology.org/amigo/term/GO:0071316	RELA
0.0419016	1	5	74.6667	Cellular response to testosterone stimulus	http://amigo.geneontology.org/amigo/term/GO:0071394	AR
0.0419016	1	5	74.6667	Cellular hyperosmotic salinity response	http://amigo.geneontology.org/amigo/term/GO:0071475	SLC25A23
0.0419016	1	5	74.6667	Keratinocyte apoptotic process	http://amigo.geneontology.org/amigo/term/GO:0097283	ZFP36
0.0419016	4	342	4.36647	Synaptic signaling	http://amigo.geneontology.org/amigo/term/GO:0099536	SYP RELA GFAP TH
0.0419016	2	65	11.4872	Negative regulation of leukocyte differentiation	http://amigo.geneontology.org/amigo/term/GO:1902106	BCL6 RARA
0.0419016	1	5	74.6667	Regulation of keratinocyte apoptotic process	http://amigo.geneontology.org/amigo/term/GO:1902172	ZFP36
0.0423574	2	66	11.3131	Negative regulation of hemopoiesis	http://amigo.geneontology.org/amigo/term/GO:1903707	BCL6 RARA
0.0423574	2	66	11.3131	Negative regulation of extrinsic apoptotic signaling pathway	http://amigo.geneontology.org/amigo/term/GO:2001237	AR RELA
0.0423574	2	66	11.3131	Acetyltransferase activity	http://amigo.geneontology.org/amigo/term/GO:0016407	EP300 KAT2B
0.0423574	2	66	11.3131	Glial cell development	http://amigo.geneontology.org/amigo/term/GO:0021782	OLIG1 GFAP
0.0423574	2	66	11.3131	Response to calcium ion	http://amigo.geneontology.org/amigo/term/GO:0051592	SLC25A23 KCNMB3
0.0423574	2	66	11.3131	Skin epidermis development	http://amigo.geneontology.org/amigo/term/GO:0098773	HDAC1 RELA
0.0424998	3	186	6.02151	Intracellular signaling by second messengers	https://reactome.org/download/current	HDAC1 RBBP7 RBBP4
0.0434558	2	67	11.1443	HATs acetylate histones	https://reactome.org/download/current	EP300 RBBP7
